# Supplementary material for: Quantitative proteomics identifies PTP1B as modulator of B cell antigen receptor signaling
Source: PubMed Central journal article supplement (PMC8473724; doi:10.26508/lsa.202101084), 2021-09-15
Supplement: LSA-2021-01084_SdataF3.pdf [file LSA-2021-01084_SdataF3.pdf]

Source files to Fig 3A-C

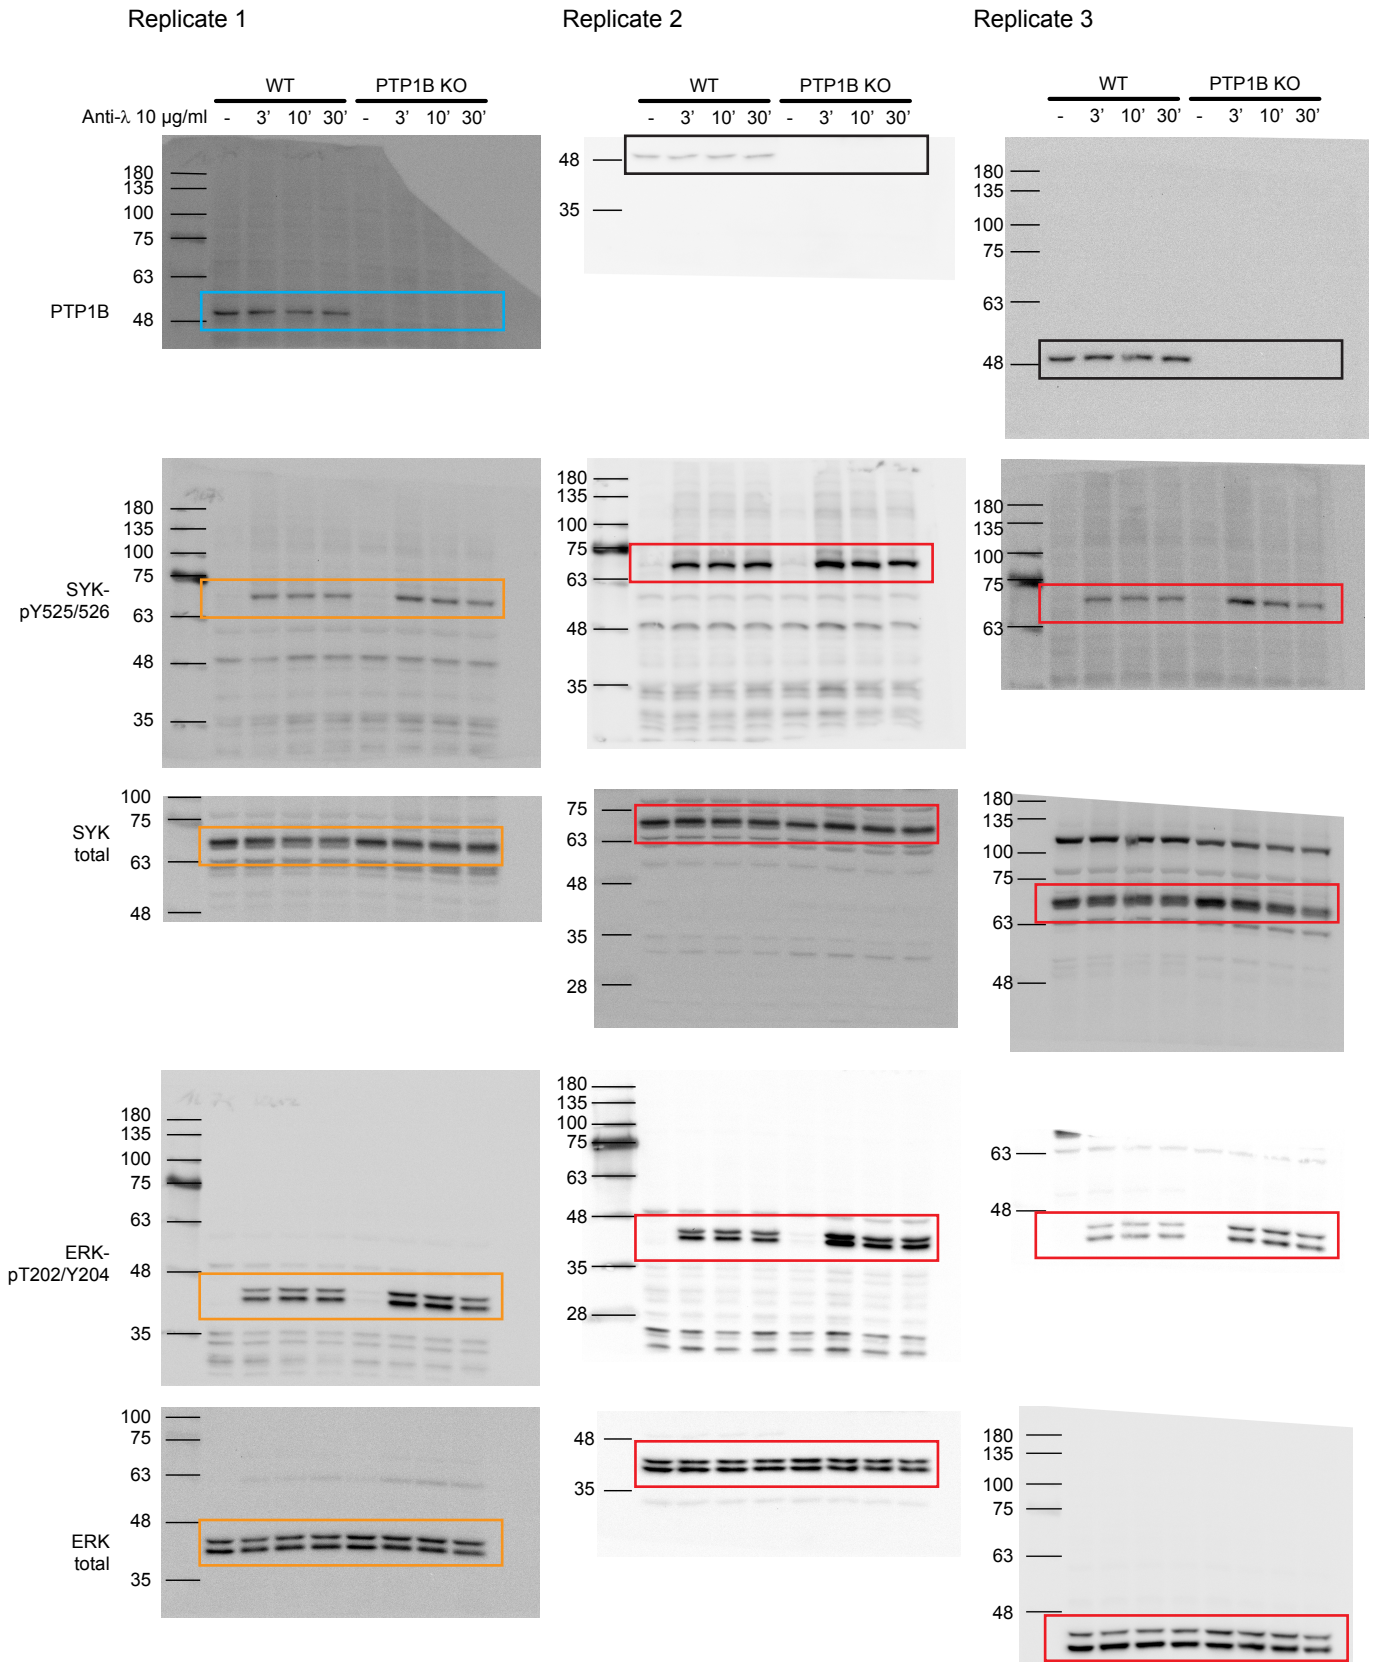

in figure and quantification
  in quantification  
 in figure
  signal in replicate

**Source files to Fig 3D-H**

**Replicate 1**

Anti- $\lambda$  10  $\mu$ g/ml  
 PTP1B KO PTP1B rescue  
 - 3' 10' 30' - 3' 10' 30'

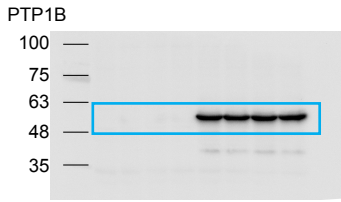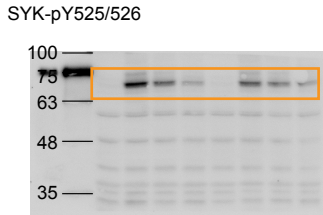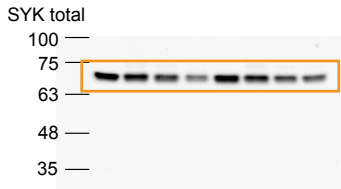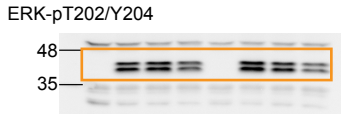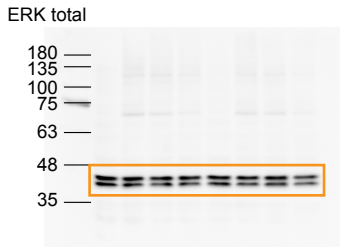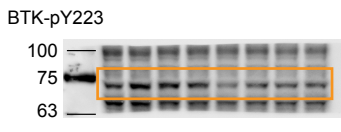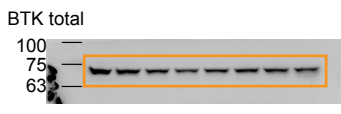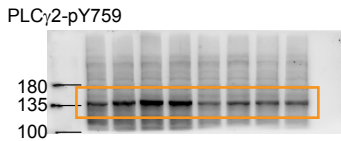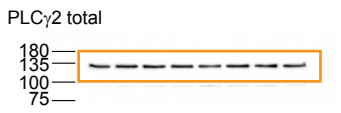

**Replicate 2**

PTP1B KO PTP1B rescue  
 - 3' 10' 30' - 3' 10' 30'

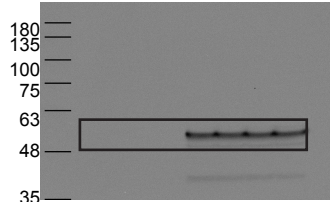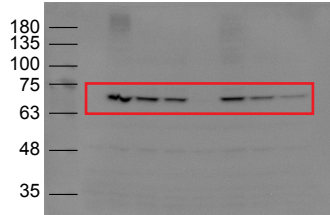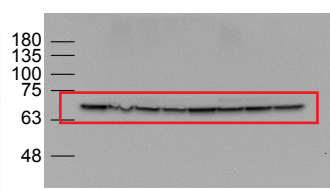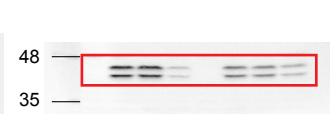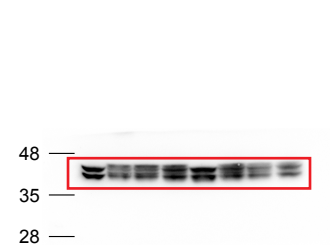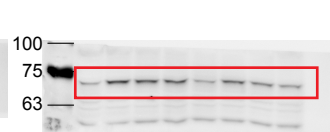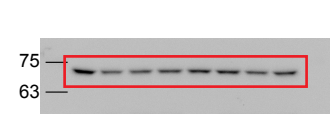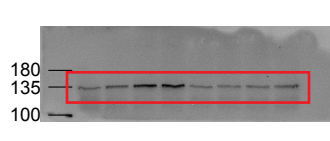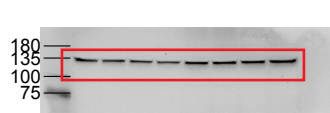

**Replicate 3**

PTP1B KO PTP1B rescue  
 - 3' 10' 30' - 3' 10' 30'

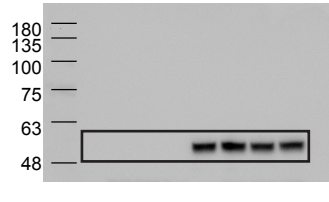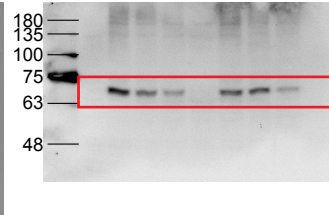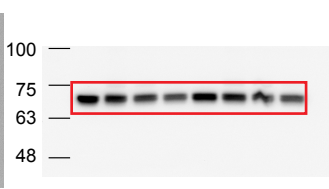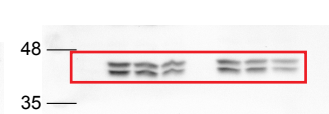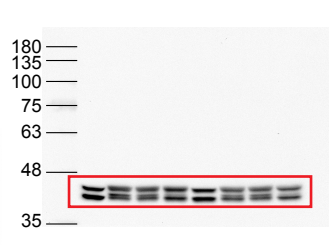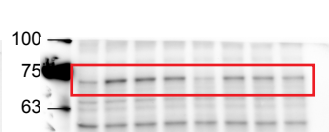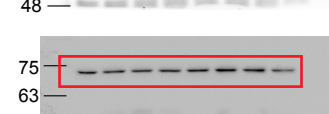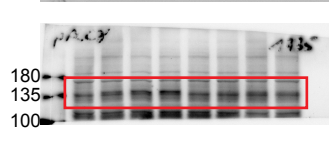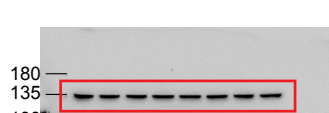

**Replicate 4**

PTP1B KO PTP1B rescue  
 - 3' 10' 30' - 3' 10' 30'

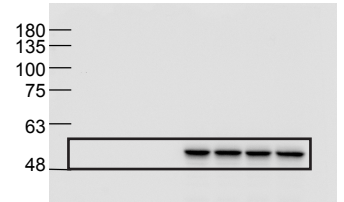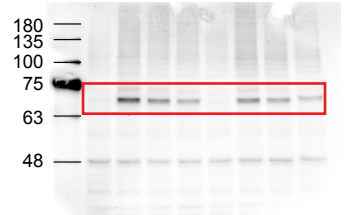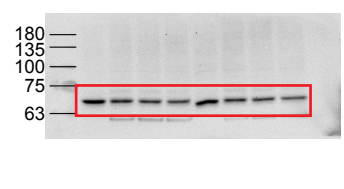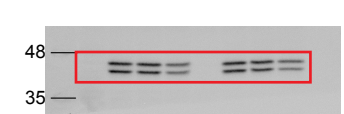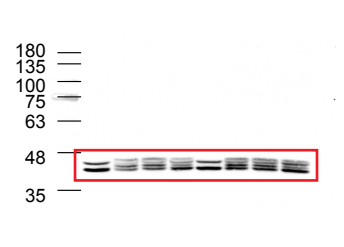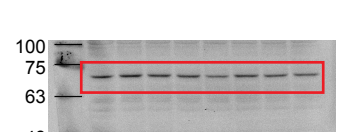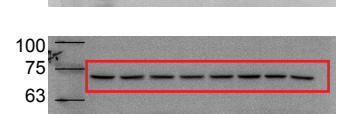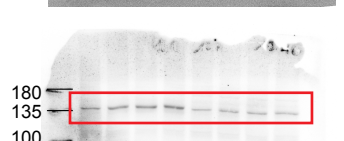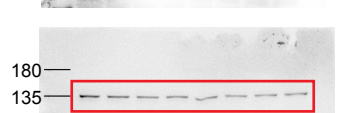

  in figure and quantification      in quantification      in figure      signal in replicate
