# Supplementary material for: Quantitative proteomics identifies PTP1B as modulator of B cell antigen receptor signaling
Source: PubMed Central journal article supplement (PMC8473724; doi:10.26508/lsa.202101084), 2021-09-15

**Source files to Fig 5A**

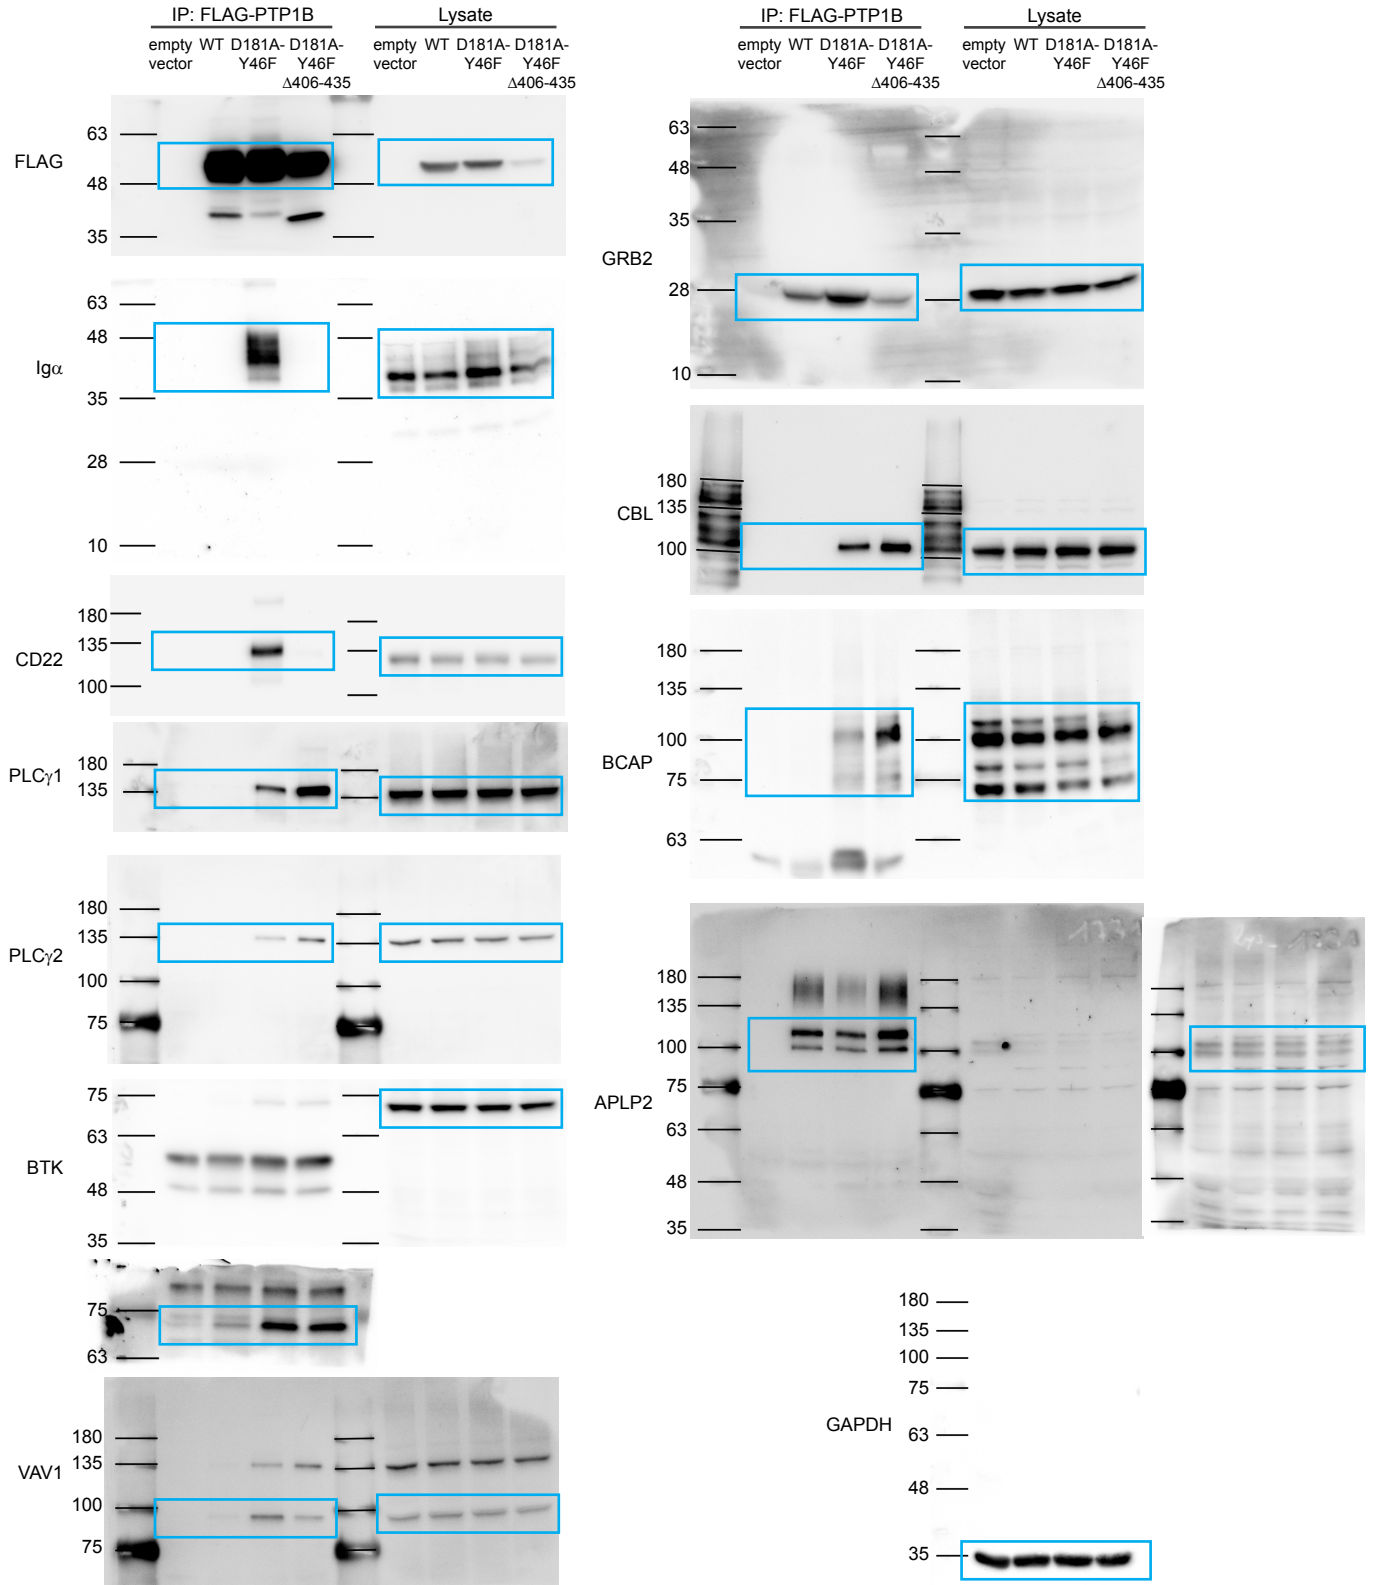

in figure

Source files to Fig 5B

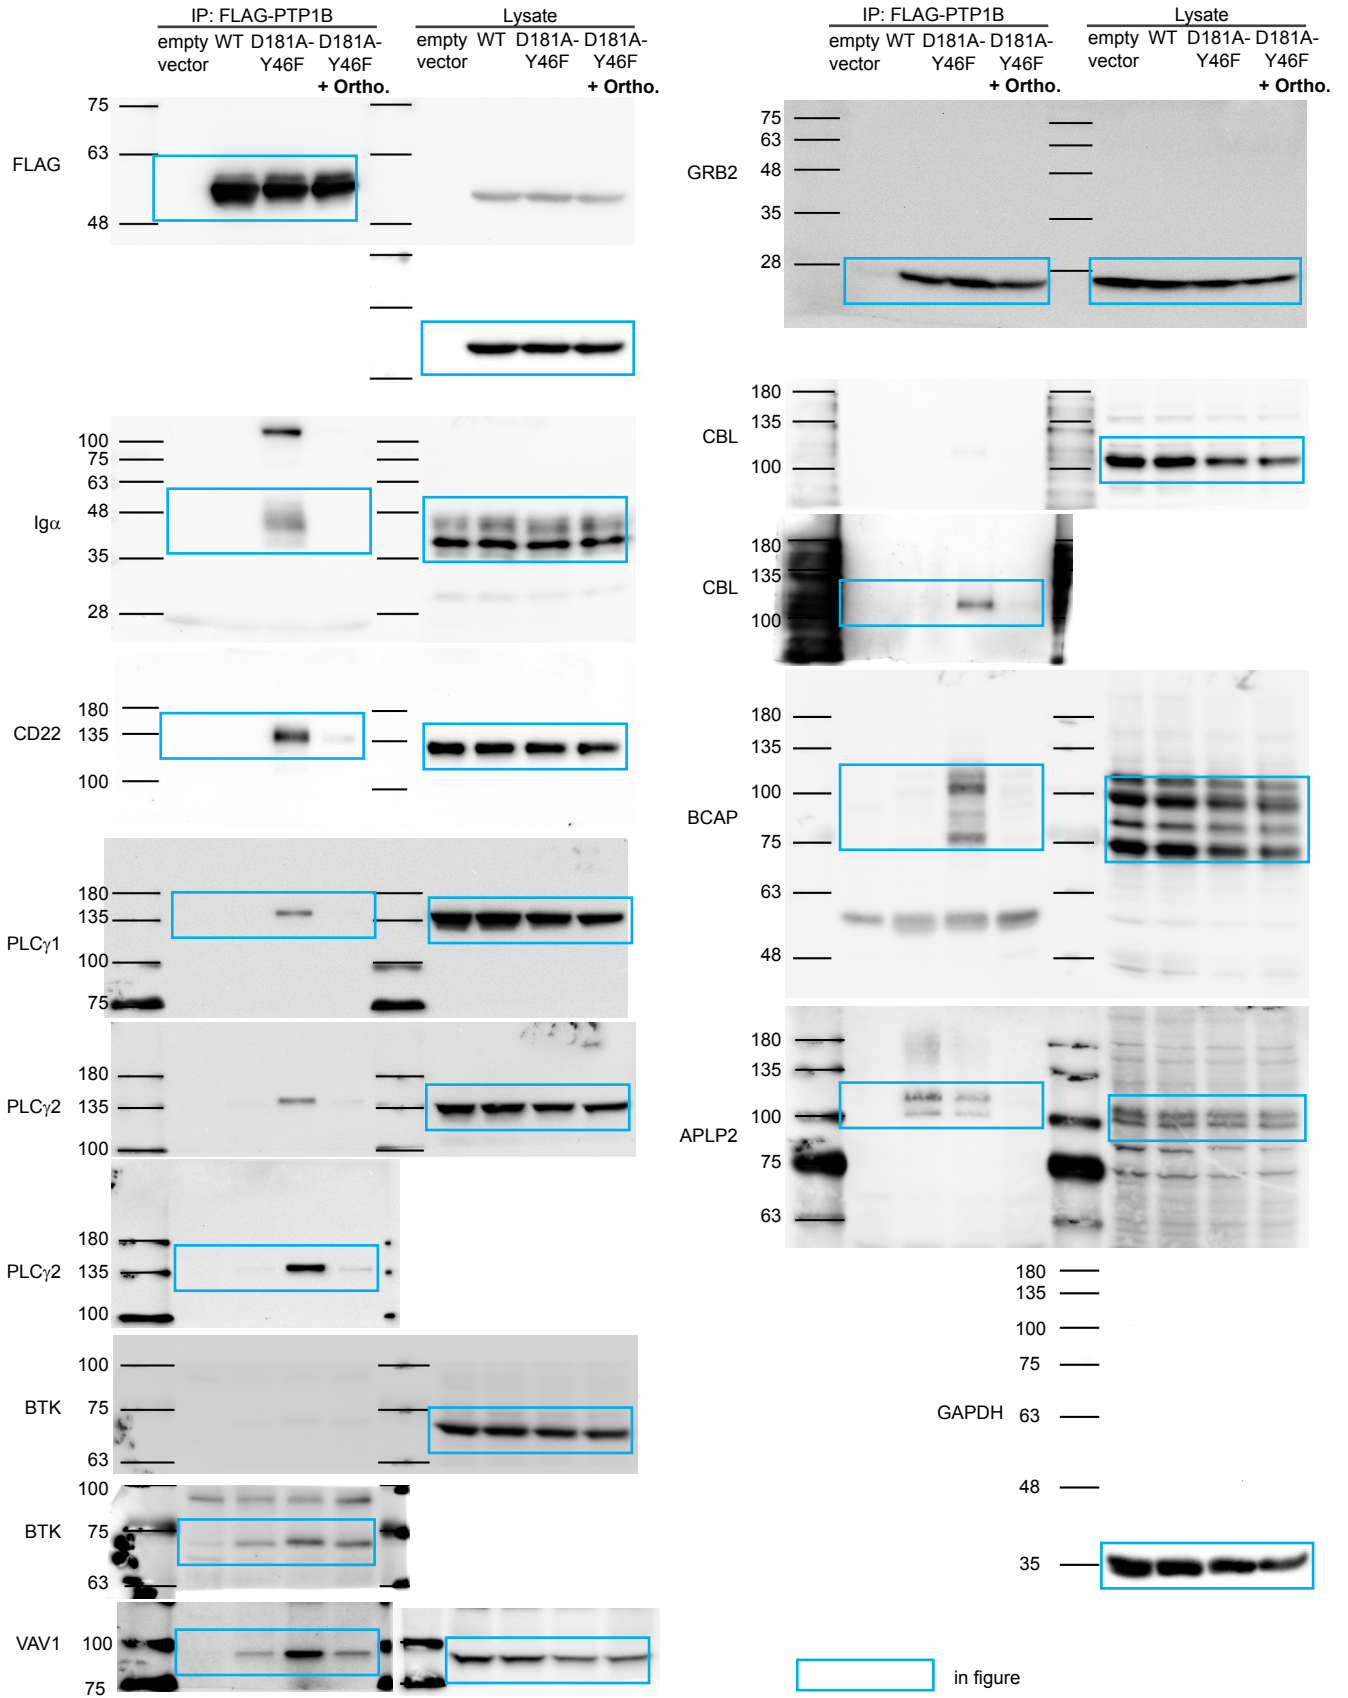

Supplement: LSA-2021-01084_SdataF5.pdf [file LSA-2021-01084_SdataF5.pdf]
