# Supplementary material for: Quantitative proteomics identifies PTP1B as modulator of B cell antigen receptor signaling
Source: PubMed Central journal article supplement (PMC8473724; doi:10.26508/lsa.202101084), 2021-09-15
Supplement: LSA-2021-01084_SdataF6_FS7.pdf [file LSA-2021-01084_SdataF6_FS7.pdf]

Source files to Fig 6C-D

Replicate 1

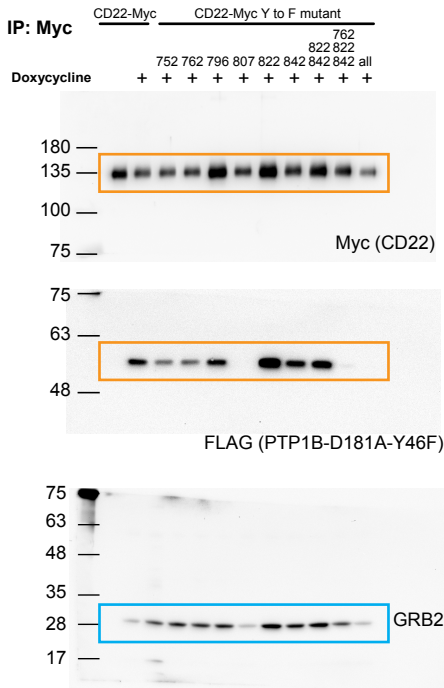

Replicate 2

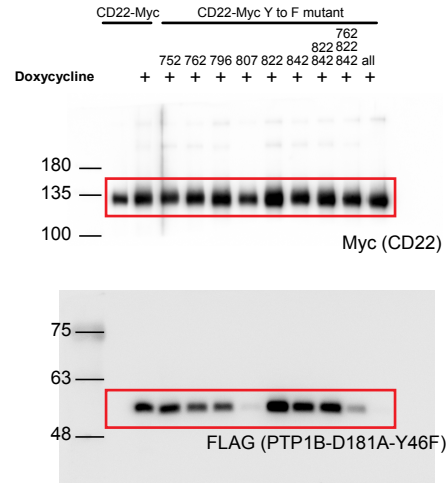

Replicate 3

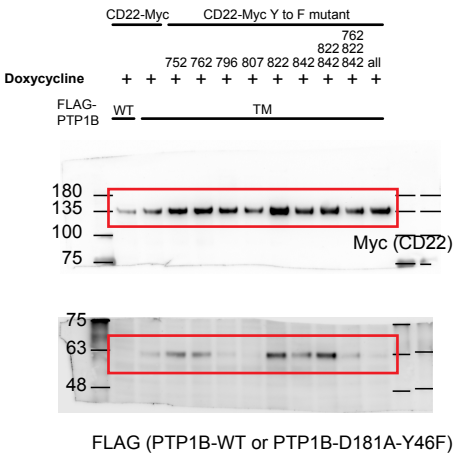

Input

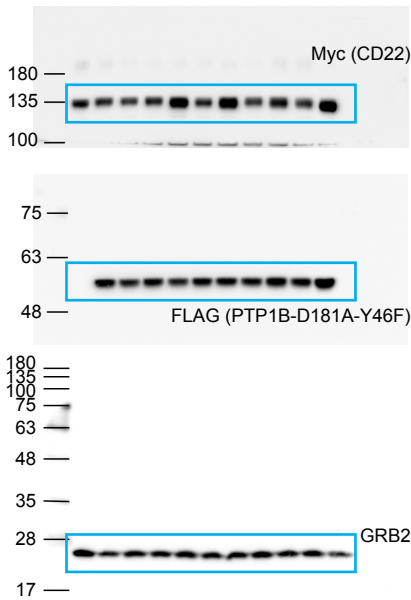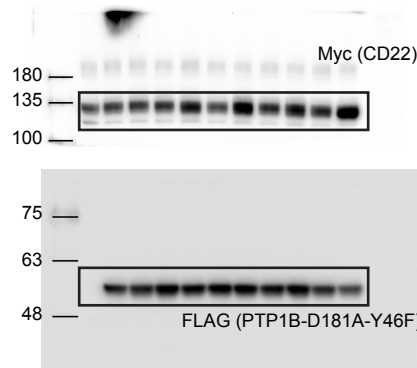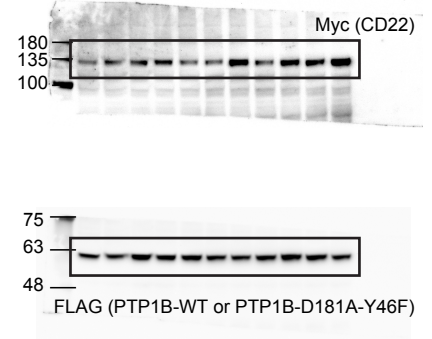

in figure and quantification  
 in figure  
 in quantification  
 signal in replicate

Source files to Fig 6E-F and Fig S7

Replicate 1

|              | IP Myc |   |   |   |   |
|--------------|--------|---|---|---|---|
| FLAG - PTP1B | +      | + | - | - | - |
| CD22-myc     | +      | + | + | + | - |
| anti-λ       | +      | - | + | - | - |

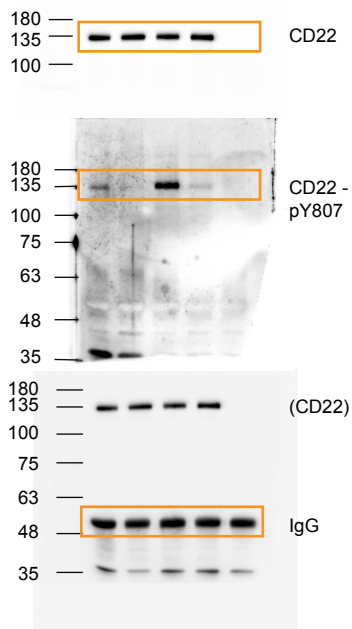

Replicate 2

|              | IP Myc |   |   |   |   |
|--------------|--------|---|---|---|---|
| FLAG - PTP1B | +      | + | - | - | - |
| CD22-myc     | +      | + | + | + | - |
| anti-λ       | +      | - | + | - | - |

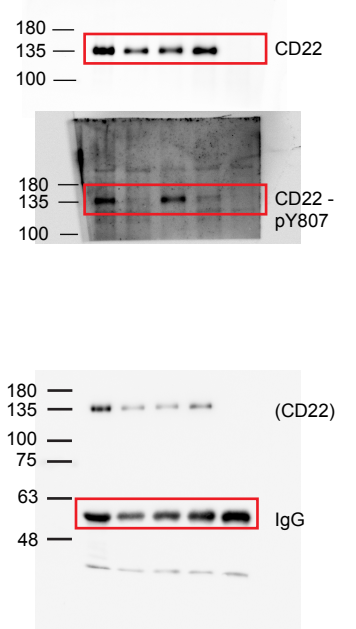

Replicate 3

|              | IP Myc |   |   |   |   |
|--------------|--------|---|---|---|---|
| FLAG - PTP1B | +      | + | - | - | - |
| CD22-myc     | +      | + | + | + | - |
| anti-λ       | +      | - | + | - | - |

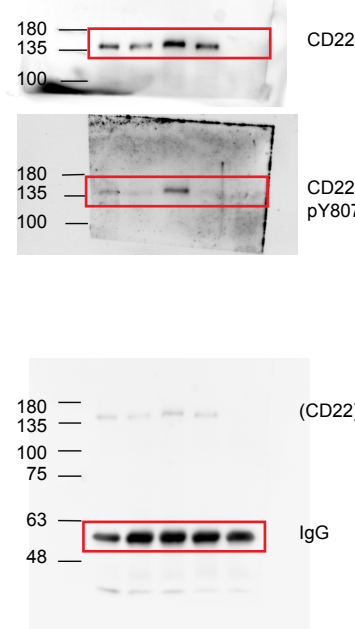

|              | Input |   |   |   |   |
|--------------|-------|---|---|---|---|
| FLAG - PTP1B | +     | + | - | - | - |
| CD22-myc     | +     | + | + | + | - |
| anti-λ       | -     | + | + | - | - |

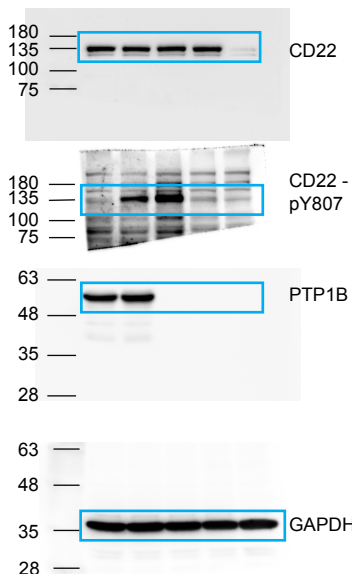

|              | Input |   |   |   |   |
|--------------|-------|---|---|---|---|
| FLAG - PTP1B | +     | + | - | - | - |
| CD22-myc     | +     | + | + | + | - |
| anti-λ       | +     | - | + | - | - |

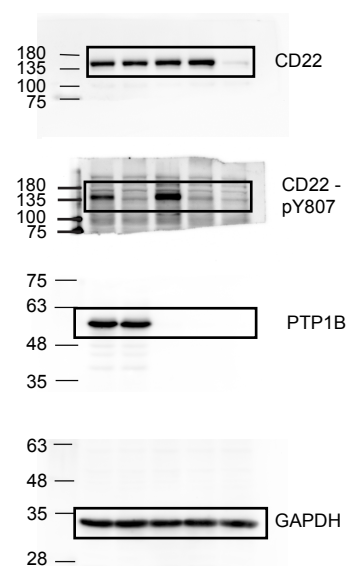

|              | Input |   |   |   |   |
|--------------|-------|---|---|---|---|
| FLAG - PTP1B | +     | + | - | - | - |
| CD22-myc     | +     | + | + | + | - |
| anti-λ       | +     | - | + | - | - |

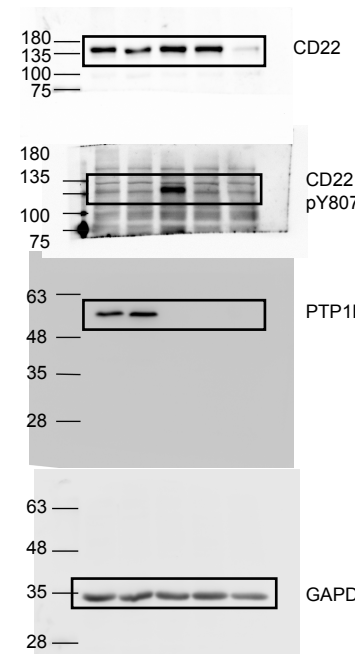

in figure and quantification  
 in figure

in quantification  
 signal in replicate
