# Supplementary material for: Quantitative proteomics identifies PTP1B as modulator of B cell antigen receptor signaling
Source: Life Sci Alliance. 2021 Sep 15;4(11):e202101084. doi: 10.26508/lsa.202101084 (PMC8473724; doi:10.26508/lsa.202101084)
Supplement: Supplementary file 1 [file LSA-2021-01084_TableS1.xlsx]

## Sheet: Information
	Quantitative Proteomics Identifies PTP1B as Modulator of B Cell Antigen Receptor Signaling
	Jennifer J. Schwarz, Lorenz Grundmann, Thomas Kokot, Kathrin Kläsener, Sandra Fotteler, David Medgyesi, Maja Köhn, Michael Reth, Bettina Warscheid
Supplemental Table 1	The Ramos B cell proteome at an absolute quantitative scale
Sheet 1	Information
Sheet 2	Copy numbers of the Ramos B cell proteome
Sheet 3	The 50 highest abundant proteins in Ramos B cells
Sheet 4	Protein Tyrosine Kinases
Sheet 5	Protein Tyrosine Phosphatases
Sheet 2	Copy numbers of the Ramos B cell proteome
Mean Copy number rank	Copy number rank determined by the proteomic ruler plugin for Perseus	Wiśniewski J. R., Hein M. Y., Cox J., and Mann M., A "proteomic ruler" for protein copy number and concentration estimation without spike-in standards. Mol Cell Proteomics, 2014, 13, pp 3497-3506
Mean LOG10 Copy number	Mean of the log10 transformed copy numbers
Mean Copy number	Mean of the copy numbers
Quantile	Indicates in which quantile (1 to 5) the protein group belongs
Protein IDs	Identifiers of the proteins contained in the protein group, sorted by number of identified peptides in descending order
Majority protein IDs	These are the IDs of those proteins that have at least half of the peptides that the leading protein has
Protein names	Names of all proteins in this group
Gene names	Gene names belonging to the proteins in this group
LOG10 Copy number Rep1	Protein copy number of the protein in the cell in replicate 1, calculated by the proteomic ruler plugin for Perseus, log10 transformed
LOG10 Copy number Rep2	Protein copy number of the protein in the cell in replicate 2, calculated by the proteomic ruler plugin for Perseus, log10 transformed
LOG10 Copy number Rep3	Protein copy number of the protein in the cell in replicate 3, calculated by the proteomic ruler plugin for Perseus, log10 transformed
Concentration [nM] Rep1	Concentration in nM of the protein in the cell in replicate 1, calculated by the proteomic ruler plugin for Perseus
Concentration [nM] Rep2	Concentration in nM of the protein in the cell in replicate 2, calculated by the proteomic ruler plugin for Perseus
Concentration [nM] Rep3	Concentration in nM of the protein in the cell in replicate 3, calculated by the proteomic ruler plugin for Perseus
LOG10 LFQ intensity Rep1	Label-free quantifcation (LFQ) intensity as calculated by MaxQuant for Replicate 1, log10 transformed	Cox J., Hein M. Y., Luber C. A., Paron I., Nagaraj N., and Mann M., Accurate Proteome-wide Label-free Quantification by Delayed Normalization and Maximal Peptide Ratio Extraction, Termed MaxLFQ. Mol Cell Proteomics, 2014, 13, pp 2513–2526.
LOG10 LFQ intensity Rep2	Label-free quantifcation (LFQ) intensity as calculated by MaxQuant for Replicate 2, log10 transformed
LOG10 LFQ intensity Rep3	Label-free quantifcation (LFQ) intensity as calculated by MaxQuant for Replicate 3, log10 transformed
Histones	Indicates with a "+" that the protein is a histone
Protein tyrosine phosphatase	Indicates with a "+" that the protein is a protein tyrosine phosphatase
Classical protein tyrosine phosphatase	Indicates with a "+" that the protein is a "classical" protein tyrosine phosphatase
Protein tyrosine kinase	Indicates with a "+" that the protein is a protein tyrosine kinase
Peptides	Number of identified peptides
Razor + unique peptides	Number of razor and unique peptides
Unique peptides	Number of unique peptides
Unique sequence coverage [%]	Protein sequence coverage in % by unique peptides
Mol. weight [Da]	Molecular weight in Da
Score	Score of the database search
Intensity	Summed up extracted ion current of all isotopic clusters associated with the identified amino acid sequence
MS/MS count	Number of the conducted MS/MS scans
Sequence length	Length of the amino acid sequence of the protein
Number of theoretical peptides (trypsin/P, 7-30)	Number of theoretical tryptic peptides of a sequence length between 7 and 30 amino acids
Sheet 3	The 50 highest abundant proteins in Ramos B cells
Mean LOG10 Copy number	Mean of the log10 transformed copy numbers
Mean Copy number	Mean of the copy numbers
Quantile	Indicates in which quantile (1 to 5) the protein group belongs
Protein IDs	Identifiers of the proteins contained in the protein group, sorted by number of identified peptides in descending order
Majority protein IDs	These are the IDs of those proteins that have at least half of the peptides that the leading protein has
Protein names	Names of all proteins in this group
Gene names	Gene names belonging to the proteins in this group
B cell specific	Term categorizing the function of the protein
V(D)J recombination	Term categorizing the function of the protein
Histones	Term categorizing the function of the protein
Cytoskeleton	Term categorizing the function of the protein
Translation / Splicing	Term categorizing the function of the protein
Glycolysis	Term categorizing the function of the protein
Chaperone	Term categorizing the function of the protein
Cancer /MYC related function	Term categorizing the function of the protein
Others	Term categorizing the function of the protein
Sheet 4	Protein Tyrosine Kinases
Mean Copy number rank	Copy number rank determined by the proteomic ruler plugin for Perseus
Mean LOG10 Copy number	Mean of the log10 transformed copy numbers
Quantile	Indicates in which quantile (1 to 5) the protein group belongs
Protein IDs	Identifiers of the proteins contained in the protein group, sorted by number of identified peptides in descending order
Majority protein IDs	These are the IDs of those proteins that have at least half of the peptides that the leading protein has
Protein names	Names of all proteins in this group
Gene names	Gene names belonging to the proteins in this group
LOG10 Copy number Rep1	Protein copy number of the protein in the cell in replicate 1, calculated by the proteomic ruler plugin for Perseus, log10 transformed
LOG10 Copy number Rep2	Protein copy number of the protein in the cell in replicate 2, calculated by the proteomic ruler plugin for Perseus, log10 transformed
LOG10 Copy number Rep3	Protein copy number of the protein in the cell in replicate 3, calculated by the proteomic ruler plugin for Perseus, log10 transformed
Concentration [nM] Rep1	Concentration in nM of the protein in the cell in replicate 1, calculated by the proteomic ruler plugin for Perseus
Concentration [nM] Rep2	Concentration in nM of the protein in the cell in replicate 2, calculated by the proteomic ruler plugin for Perseus
Concentration [nM] Rep3	Concentration in nM of the protein in the cell in replicate 3, calculated by the proteomic ruler plugin for Perseus
LOG10 LFQ intensity Rep1	Label-free quantifcation (LFQ) intensity as calculated by MaxQuant for Replicate 1, log10 transformed
LOG10 LFQ intensity Rep2	Label-free quantifcation (LFQ) intensity as calculated by MaxQuant for Replicate 2, log10 transformed
LOG10 LFQ intensity Rep3	Label-free quantifcation (LFQ) intensity as calculated by MaxQuant for Replicate 3, log10 transformed
Protein tyrosine kinase	Indicates with a "+" that the protein is a protein tyrosine kinase
Peptides	Number of identified peptides
Razor + unique peptides	Number of razor and unique peptides
Unique peptides	Number of unique peptides
Unique sequence coverage [%]	Protein sequence coverage in % by unique peptides
Mol. weight [Da]	Molecular weight in Da
Score	Score of the database search
Intensity	Summed up extracted ion current of all isotopic clusters associated with the identified amino acid sequence
MS/MS count	Number of the conducted MS/MS scans
Sequence length	Length of the amino acid sequence of the protein
Number of theoretical peptides (trypsin/P, 7-30)	Number of theoretical tryptic peptides of a sequence length between 7 and 30 amino acids
Sheet 5	Protein Tyrosine Phosphatases
Mean Copy number rank	Copy number rank determined by the proteomic ruler plugin for Perseus
Mean LOG10 Copy number	Mean of the log10 transformed copy numbers
Quantile	Indicates in which quantile (1 to 5) the protein group belongs
Protein IDs	Identifiers of the proteins contained in the protein group, sorted by number of identified peptides in descending order
Majority protein IDs	These are the IDs of those proteins that have at least half of the peptides that the leading protein has
Protein names	Names of all proteins in this group
Gene names	Gene names belonging to the proteins in this group
LOG10 Copy number Rep1	Protein copy number of the protein in the cell in replicate 1, calculated by the proteomic ruler plugin for Perseus, log10 transformed
LOG10 Copy number Rep2	Protein copy number of the protein in the cell in replicate 2, calculated by the proteomic ruler plugin for Perseus, log10 transformed
LOG10 Copy number Rep3	Protein copy number of the protein in the cell in replicate 3, calculated by the proteomic ruler plugin for Perseus, log10 transformed
Concentration [nM] Rep1	Concentration in nM of the protein in the cell in replicate 1, calculated by the proteomic ruler plugin for Perseus
Concentration [nM] Rep2	Concentration in nM of the protein in the cell in replicate 2, calculated by the proteomic ruler plugin for Perseus
Concentration [nM] Rep3	Concentration in nM of the protein in the cell in replicate 3, calculated by the proteomic ruler plugin for Perseus
LOG10 LFQ intensity Rep1	Label-free quantifcation (LFQ) intensity as calculated by MaxQuant for Replicate 1, log10 transformed
LOG10 LFQ intensity Rep2	Label-free quantifcation (LFQ) intensity as calculated by MaxQuant for Replicate 2, log10 transformed
LOG10 LFQ intensity Rep3	Label-free quantifcation (LFQ) intensity as calculated by MaxQuant for Replicate 3, log10 transformed
Protein tyrosine phosphatase	Indicates with a "+" that the protein is a protein tyrosine phosphatase
Classical protein tyrosine phosphatase	Indicates with a "+" that the protein is a "classical" protein tyrosine phosphatase
Peptides	Number of identified peptides
Razor + unique peptides	Number of razor and unique peptides
Unique peptides	Number of unique peptides
Unique sequence coverage [%]	Protein sequence coverage in % by unique peptides
Mol. weight [Da]	Molecular weight in Da
Score	Score of the database search
Intensity	Summed up extracted ion current of all isotopic clusters associated with the identified amino acid sequence
MS/MS count	Number of the conducted MS/MS scans
Sequence length	Length of the amino acid sequence of the protein
Number of theoretical peptides (trypsin/P, 7-30)	Number of theoretical tryptic peptides of a sequence length between 7 and 30 amino acids

## Sheet: Copy number_Ramos
								LOG10						LOG10
Mean Copy number rank	Mean LOG10 Copy number	Mean Copy number	Quantile	Protein IDs	Majority protein IDs	Protein names	Gene names	Copy number Rep1	Copy number Rep2	Copy number Rep3	Concentration [nM] Rep1	Concentration [nM] Rep2	Concentration [nM] Rep3	LFQ intensity Rep1	LFQ intensity Rep2	LFQ intensity Rep3	Histones	Protein tyrosine phosphatase	Classical protein tyrosine phosphatase	Protein tyrosine kinase	Peptides	Razor + unique peptides	Unique peptides	Unique sequence coverage [%]	Mol. weight [Da]	Score	Intensity	MS/MS count	Sequence length	Number of theoretical peptides (trypsin/P, 7-30)
1	8.053	1.13373e+08	Q1	P62805	P62805	Histone H4	HIST1H4A	8.08788	8.06697	8.0044	5.29355	5.25724	5.20435	11.7512	11.7303	11.6677	+				23	23	23	71.8	11367	323.31	2142000000000	2612	103	6
2	7.775	59838096	Q1	Q16777	Q16777	Histone H2A type 2-C	HIST2H2AC	7.83089	7.73921	7.75521	5.03655	4.92948	4.95517	11.415	11.3233	11.3393	+				9	9	1	19.4	13988	188.69	810170000000	1364	129	5
3	7.754	5.78387e+07	Q1	K7EK07;P84243;K7EMV3;B4DEB1;K7ES00;Q6NXT2;K7EP01	K7EK07;P84243;K7EMV3;B4DEB1;K7ES00;Q6NXT2	Histone H3;Histone H3.3;Histone H3.3C	H3F3B;H3F3A;H3F3C	7.74181	7.65837	7.86211	4.94747	4.84863	5.06206	11.2802	11.1967	11.4005	+				15	15	2	27.3	14914	170.92	791050000000	715	132	4.5
4	7.648	4.45105e+07	Q1	P60709;E7EVS6;G5E9R0;C9JZR7;C9JUM1;C9JTX5	P60709	Actin, cytoplasmic 1;Actin, cytoplasmic 1, N-terminally processed	ACTB	7.64523	7.66331	7.63641	4.8509	4.85358	4.83637	11.8314	11.8495	11.8226					36	36	1	4.5	41736	323.31	3118600000000	4315	375	20
5	7.62	41694348	Q1	P62937;F8WE65;C9J5S7;P62937-2;P0DN26;A0A0H2UH34;A0A0B4J2A2;A0A075B767;A0A075B759;Q9Y536;F5H284;E5RIZ5;P0DN37	P62937;F8WE65;C9J5S7;P62937-2	Peptidyl-prolyl cis-trans isomerase A;Peptidyl-prolyl cis-trans isomerase A, N-terminally processed;Peptidyl-prolyl cis-trans isomerase	PPIA	7.64808	7.59436	7.6161	4.85374	4.78463	4.81606	11.3783	11.3246	11.3463					18	18	18	90.9	18012	323.31	1024800000000	1349	165	7
6	7.61	40872844	Q1	P04406;E7EUT5	P04406;E7EUT5	Glyceraldehyde-3-phosphate dehydrogenase	GAPDH	7.59192	7.65114	7.58834	4.79759	4.84141	4.78829	11.6532	11.7124	11.6496					37	37	3	12.8	36053	323.31	2122200000000	3239	335	15
7	7.538	3.46268e+07	Q1	Q8N257	Q8N257	Histone H2B type 3-B	HIST3H2BB	7.56639	7.55242	7.4963	4.77206	4.74269	4.69625	11.2966	11.2827	11.2265	+				11	11	1	5.6	13908	100.3	787080000000	1055	126	7
8	7.404	2.54295e+07	Q1	P68371;M0R2D3;M0QY85;M0QZL7;M0R278;M0R0X0;M0QY37;M0QX14;M0R2T4;A0A075B724	P68371	Tubulin beta-4B chain	TUBB4B	7.44533	7.39896	7.36824	4.65099	4.58923	4.56819	11.6315	11.5851	11.5544					39	39	2	3.6	49830	323.31	1727400000000	2295	445	20
9	7.37	23506168	Q1	Q9BQE3;F5H5D3;A0A1W2PQM2	Q9BQE3;F5H5D3;A0A1W2PQM2	Tubulin alpha-1C chain	TUBA1C	7.39158	7.39336	7.32518	4.59725	4.58363	4.52513	11.599	11.6007	11.5326					38	38	3	13.4	49895	323.31	1538800000000	2106	449	21
10	7.362	23076478	Q1	P08238;Q58FF7	P08238	Heat shock protein HSP 90-beta	HSP90AB1	7.34772	7.40207	7.33686	4.55339	4.59234	4.53682	11.7514	11.8057	11.7405					83	83	54	59.8	83263	323.31	2259000000000	3273	724	33
11	7.343	2.20301e+07	Q1	P00338;P00338-3;P00338-4;P00338-5;P00338-2;F5GXY2;F5GYU2;F5GXH2;F5H5J4;F5H6W8;F5GZQ4;F5H8H6;F5GXC7;F5GWW2;F5GXU1;A0A087WUM2;Q6ZMR3	P00338;P00338-3;P00338-4;P00338-5;P00338-2	L-lactate dehydrogenase A chain	LDHA	7.33928	7.34652	7.34321	4.54495	4.53679	4.54317	11.4005	11.4078	11.4045					36	36	34	88.9	36688	323.31	1063800000000	1832	332	15
12	7.341	21954028	Q1	P62979	P62979	Ubiquitin-40S ribosomal protein S27a;Ubiquitin;40S ribosomal protein S27a	RPS27A	7.31745	7.32731	7.37738	4.52311	4.51758	4.57733	10.9808	10.9906	11.0407					13	13	6	31.4	17965	323.31	359690000000	626	156	6
13	7.34	2.18573e+07	Q1	P09211;A8MX94;A0A087X2E9;A0A087X243	P09211;A8MX94	Glutathione S-transferase P	GSTP1	7.33934	7.34008	7.33937	4.54501	4.53034	4.53932	11.2022	11.2029	11.2022					19	19	19	71.9	23356	323.31	573050000000	830	210	9.5
14	7.333	2.15286e+07	Q1	P06733;P06733-2;K7EM90;E5RI09;E5RG95;K7EPM1;K7EKN2	P06733;P06733-2	Alpha-enolase	ENO1	7.33787	7.31939	7.34147	4.54354	4.50965	4.54142	11.5131	11.4946	11.5167					38	38	34	70.7	47168	323.31	1306800000000	2023	434	19.5
15	7.329	21340092	Q1	P68104;Q5VTE0;A0A087WVQ9;P68104-2;A0A087WV01;Q5JR01;A6PW80	P68104;Q5VTE0;A0A087WVQ9;P68104-2;A0A087WV01	Elongation factor 1-alpha 1;Putative elongation factor 1-alpha-like 3;Elongation factor 1-alpha	EEF1A1;EEF1A1P5	7.3369	7.33043	7.3201	4.54256	4.5207	4.52005	11.5008	11.4943	11.484					37	37	20	49.6	50140	323.31	1394800000000	2798	462	19
16	7.322	2.10089e+07	Q1	P23528;G3V1A4;E9PK25;E9PP50;E9PQB7;E9PLJ3;E9PS23	P23528;G3V1A4;E9PK25;E9PP50;E9PQB7;E9PLJ3	Cofilin-1	CFL1	7.31426	7.34947	7.30207	4.51993	4.53974	4.50203	11.1771	11.2124	11.1649					24	24	19	69.9	18502	323.31	554110000000	552	166	9.5
17	7.268	18589860	Q1	P05387;H0YDD8;P05386-2	P05387;H0YDD8	60S acidic ribosomal protein P2	RPLP2	7.24397	7.30641	7.25486	4.44963	4.49667	4.45481	10.7823	10.8448	10.7932					12	12	11	97.4	11665	292.26	208850000000	329	115	4.5
18	7.247	1.76822e+07	Q1	P63104;E7EX29;B0AZS6;P63104-2;B7Z2E6;H0YB80;E7ESK7;E5RIR4;E9PD24;E7EVZ2;E5RGE1	P63104;E7EX29;B0AZS6;P63104-2;B7Z2E6;H0YB80;E7ESK7	14-3-3 protein zeta/delta	YWHAZ	7.22028	7.26914	7.25178	4.42595	4.45941	4.45174	11.0597	11.1085	11.0912					26	26	20	71.4	27745	323.31	505570000000	917	245	9
19	7.209	16330414	Q1	P14174	P14174	Macrophage migration inhibitory factor	MIF	7.16767	7.29306	7.16563	4.37333	4.48333	4.36559	10.7518	10.8772	10.7498					9	9	9	60.9	12476	90.123	293200000000	494	115	5
20	7.206	1.61386e+07	Q1	P09651;F8W6I7;P09651-3;P09651-2;F8VZ49;F8VTQ5;F8VYN5;F8W646;H0YH80	P09651;F8W6I7;P09651-3;P09651-2;F8VZ49;F8VTQ5;F8VYN5	Heterogeneous nuclear ribonucleoprotein A1;Heterogeneous nuclear ribonucleoprotein A1, N-terminally processed	HNRNPA1	7.15635	7.26403	7.19634	4.36202	4.4543	4.3963	11.2176	11.3253	11.2576					48	47	15	33.6	38746	323.31	722820000000	1409	372	15
21	7.193	1.56073e+07	Q1	P07108;B8ZWD1;A0A0A0MTI5;P07108-3;P07108-2;P07108-4;P07108-5;P07108-6	P07108;B8ZWD1;A0A0A0MTI5;P07108-3;P07108-2;P07108-4;P07108-5	Acyl-CoA-binding protein	DBI	7.16138	7.19717	7.21947	4.36704	4.38743	4.41943	10.7455	10.7813	10.8036					8	8	8	83.9	10044	323.31	239440000000	177	87	5
22	7.189	1.54888e+07	Q1	P11142;E9PKE3;E9PNE6;P11142-2;E9PN89;E9PLF4;E9PQQ4;E9PQK7;E9PK54;E9PPY6;E9PN25	P11142;E9PKE3;E9PNE6;P11142-2;E9PN89	Heat shock cognate 71 kDa protein	HSPA8	7.16255	7.18413	7.22133	4.36821	4.3744	4.42128	11.4456	11.4672	11.5044					56	54	6	10.4	70897	323.31	1277200000000	1785	646	25
23	7.185	1.53261e+07	Q1	Q06830;A0A0A0MSI0;A0A0A0MRQ5	Q06830;A0A0A0MSI0	Peroxiredoxin-1	PRDX1	7.18115	7.20724	7.16694	4.38682	4.39751	4.36689	11.2124	11.2385	11.1982					23	23	18	64.3	22110	323.31	652640000000	637	199	14
24	7.182	15285196	Q1	P07195;A8MW50;C9J7H8;F5H793;F5H5G7;F5H155;G3XAP5;F5H245;P07864	P07195;A8MW50	L-lactate dehydrogenase B chain;L-lactate dehydrogenase	LDHB	7.20995	7.21317	7.12392	4.41562	4.40344	4.32388	11.2254	11.2287	11.1394					24	22	22	64.4	36638	323.31	656080000000	1278	334	13.5
25	7.152	1.43503e+07	Q1	P10809;E7ESH4;E7EXB4;P10809-2;C9JL25;C9JL19;C9JCQ4;C9J0S9;F8WBB1	P10809	60 kDa heat shock protein, mitochondrial	HSPD1	7.13885	7.16629	7.15052	4.34452	4.35656	4.35047	11.5291	11.5566	11.5408					56	56	56	79.1	61054	323.31	1437700000000	2689	573	32
26	7.151	1.41916e+07	Q1	P07737;K7EJ44;I3L3D5	P07737;K7EJ44	Profilin-1	PFN1	7.18094	7.22278	7.04844	4.38661	4.41305	4.24839	10.9692	11.011	10.8367					14	14	9	56.4	15054	323.31	379220000000	793	140	8
27	7.137	1.38479e+07	Q1	P06748;P06748-2;P06748-3;E5RGW4	P06748;P06748-2;P06748-3	Nucleophosmin	NPM1	7.14612	7.20868	7.05595	4.35179	4.39895	4.2559	11.1105	11.173	11.0203					19	19	14	41.8	32575	323.31	558910000000	1111	294	12
28	7.108	1.28765e+07	Q1	P13639;M0R0I6	P13639	Elongation factor 2	EEF2	7.11221	7.15467	7.05585	4.31787	4.34494	4.25581	11.6506	11.693	11.5942					103	103	101	86.5	95337	323.31	1804100000000	3049	858	45
29	7.107	1.28662e+07	Q1	P22626;P22626-2;A0A087WUI2	P22626;P22626-2;A0A087WUI2	Heterogeneous nuclear ribonucleoproteins A2/B1	HNRNPA2B1	7.0486	7.10612	7.16665	4.25427	4.29639	4.36661	11.2125	11.27	11.3306					49	49	48	76.8	37429	323.31	805640000000	1767	353	19
30	7.077	1.19456e+07	Q1	P14618;P14618-3;B4DNK4;H3BQ34;H3BUW1;H3BTJ2;H3BT25;H3BU13;H3BN34;H3BQZ3	P14618;P14618-3;B4DNK4	Pyruvate kinase PKM;Pyruvate kinase	PKM	7.09056	7.06543	7.07526	4.29623	4.2557	4.27521	11.4671	11.442	11.4518					52	52	5	9.4	57936	323.31	1179500000000	1569	531	31
31	7.073	11913769	Q1	Q5T7C4;P09429;B2RPK0	Q5T7C4;P09429;B2RPK0	High mobility group protein B1;Putative high mobility group protein B1-like 1	HMGB1;HMGB1P1	7.04483	7.0763	7.09866	4.2505	4.26656	4.29862	10.7081	10.7396	10.762					25	25	19	54.4	18311	323.31	205170000000	474	158	6
32	7.071	11852838	Q1	P05386	P05386	60S acidic ribosomal protein P1	RPLP1	7.12127	7.11772	6.97343	4.32694	4.30799	4.17338	10.4835	10.48	10.3357					6	5	5	79.8	11514	165.71	104060000000	233	114	3
33	7.069	11725028	Q1	P04075;J3KPS3;P04075-2;H3BQN4;H3BPS8;H3BUH7;H3BR04;H3BMQ8;H3BU78;H3BR68;A0A087WXX2;P05062	P04075;J3KPS3;P04075-2;H3BQN4;H3BPS8;H3BUH7	Fructose-bisphosphate aldolase A;Fructose-bisphosphate aldolase	ALDOA	7.07474	7.05018	7.08179	4.28041	4.24045	4.28175	11.3121	11.2875	11.3191					36	36	32	77.2	39420	323.31	849660000000	1259	364	22.5
34	7.062	1.15702e+07	Q1	P62857	P62857	40S ribosomal protein S28	RPS28	7.02721	7.06515	7.095	4.23288	4.25542	4.29496	10.3895	10.4274	10.4573					8	8	8	58	7840.9	323.31	102230000000	114	69	3
35	7.043	1.10694e+07	Q1	P06576;H0YH81;F8W079;H0YI37	P06576;H0YH81;F8W079	ATP synthase subunit beta, mitochondrial;ATP synthase subunit beta	ATP5B	7.01494	7.07611	7.03913	4.22061	4.26637	4.23908	11.2011	11.2623	11.2253					34	34	19	48.6	56559	323.31	711680000000	1377	529	20
36	7.029	1.07183e+07	Q1	P01704	P01704	Ig lambda chain V-II region TOG		7.00047	7.06348	7.02409	4.20613	4.25375	4.22404	10.1867	10.2497	10.2103					1	1	1	13.3	12597	3.6512	75624000000	151	120	2
37	7.007	10175329	Q1	P62263;E5RH77;H0YB22	P62263;E5RH77	40S ribosomal protein S14	RPS14	7.0109	7.02912	6.98129	4.21657	4.21938	4.18124	10.4401	10.4583	10.4105					11	11	11	67.5	16273	323.31	98562000000	142	151	3.5
38	6.997	9990835	Q1	P62826;J3KQE5;F5H018;B5MDF5;B4DV51;H0YFC6;A0A087X0W0	P62826;J3KQE5;F5H018;B5MDF5	GTP-binding nuclear protein Ran	RAN	6.936	7.02245	7.03391	4.14167	4.21272	4.23387	10.8423	10.9288	10.9403					23	23	23	69	24423	323.31	302690000000	545	216	10.5
39	6.993	9.85033e+06	Q1	Q01469;I6L8B7;A8MUU1;REV__Q99880;REV__Q99879;REV__Q99877;REV__Q93079;REV__Q8N257;REV__Q5QNW6;REV__Q16778;REV__P62807;REV__P58876;REV__P57053;REV__P33778;REV__P23527;REV__P06899;REV__O60814;REV__Q5QNW6-2;REV__U3KQK0	Q01469;I6L8B7	Fatty acid-binding protein, epidermal	FABP5	7.01155	6.98775	6.98044	4.21722	4.17802	4.18039	10.7096	10.6858	10.6785					15	15	15	83	15164	323.31	204150000000	223	135	6.5
40	6.989	9.75942e+06	Q1	P26583;D6R9A6	P26583;D6R9A6	High mobility group protein B2	HMGB2	6.98023	6.96867	7.01784	4.18589	4.15894	4.21779	10.5643	10.5528	10.602					22	19	18	40.7	24033	278.47	134600000000	278	209	5
41	6.985	9685123	Q1	P22392-2;Q32Q12;J3KPD9	P22392-2;Q32Q12;J3KPD9	Nucleoside diphosphate kinase	NME1-NME2;NME2	7.00823	6.99524	6.95294	4.2139	4.18551	4.15289	11.1721	11.1592	11.1168					19	19	1	2.6	30137	295.49	585810000000	709	267	19
42	6.976	9.48078e+06	Q1	B4DY08	B4DY08		HNRNPC	6.9594	6.9589	7.0102	4.16507	4.14917	4.21016	11.0487	11.0482	11.0995					33	33	1	3.1	31971	323.31	420300000000	615	288	16
43	6.969	9.33754e+06	Q1	C9J9K3;A0A0C4DG17;P08865;F8WD59	C9J9K3;A0A0C4DG17;P08865	40S ribosomal protein SA	RPSA	7.01806	6.9485	6.93983	4.22373	4.13876	4.13978	11.0172	10.9476	10.9389					24	24	24	74.5	29404	323.31	355310000000	468	263	13
44	6.967	9269461	Q1	P60174;P60174-1;P60174-4;U3KPZ0;U3KQF3;U3KPS5	P60174;P60174-1;P60174-4	Triosephosphate isomerase	TPI1	6.98896	6.96765	6.94336	4.19462	4.15792	4.14331	11.1046	11.0832	11.059					26	26	26	81.8	30791	323.31	489760000000	669	286	17
45	6.959	9.15134e+06	Q1	P40926;P40926-2;G3XAL0	P40926;P40926-2;G3XAL0	Malate dehydrogenase, mitochondrial;Malate dehydrogenase	MDH2	6.97168	6.89062	7.01333	4.17735	4.08089	4.21328	11.1121	11.031	11.1538					22	22	22	69.5	35503	323.31	489680000000	601	338	18
46	6.94	8710800	Q1	P23396;P23396-2;E9PL09;E9PPU1;F2Z2S8;H0YCJ7;H0YEU2;E9PQ96;E9PJH4;H0YF32;E9PSF4;E9PQX2;H0YES8	P23396;P23396-2;E9PL09;E9PPU1;F2Z2S8;H0YCJ7;H0YEU2	40S ribosomal protein S3	RPS3	6.93502	6.94141	6.9437	4.14068	4.13168	4.14365	10.9341	10.9405	10.9428					34	34	17	56	26688	323.31	357140000000	446	243	13
47	6.924	8.39166e+06	Q1	P61978-2;P61978;S4R457	P61978-2;P61978	Heterogeneous nuclear ribonucleoprotein K	HNRNPK	6.9231	6.93425	6.91384	4.12877	4.12452	4.11379	11.1793	11.1905	11.1701					44	44	2	8	51028	323.31	629750000000	1295	464	23.5
48	6.921	8.39097e+06	Q1	P09936;D6RE83;D6R956;D6R974;D6RF53	P09936;D6RE83;D6R956;D6R974	Ubiquitin carboxyl-terminal hydrolase isozyme L1;Ubiquitin carboxyl-terminal hydrolase	UCHL1	6.88093	6.95566	6.92749	4.0866	4.14593	4.12744	10.7438	10.8185	10.7904					20	20	20	87.9	24824	323.31	260900000000	406	223	9.5
49	6.92	8.36462e+06	Q1	P62314;J3QLI9;J3QLR7	P62314;J3QLI9	Small nuclear ribonucleoprotein Sm D1	SNRPD1	7.00196	6.8626	6.89442	4.20763	4.05287	4.09438	10.3642	10.2249	10.2567					5	5	5	58.8	13281	323.31	66597000000	94	119	3
50	6.915	8.22824e+06	Q1	P13796;Q5TBN3;P13796-2;Q5TBN5;U3KQI3	P13796	Plastin-2	LCP1	6.91385	6.92584	6.90599	4.11952	4.11611	4.10594	11.3672	11.3792	11.3593					69	69	60	82.8	70288	323.31	974910000000	1667	627	37
51	6.91	8.19994e+06	Q1	P62081;B5MCP9	P62081;B5MCP9	40S ribosomal protein S7	RPS7	6.84679	6.90135	6.98248	4.05246	4.09161	4.18243	10.7319	10.7865	10.8676					19	19	19	76.3	22127	323.31	233620000000	413	194	10
52	6.89	7.84868e+06	Q1	P0DP25;P0DP24;P0DP23;H0Y7A7;M0QZ52;F8WBR5;G3V479	P0DP25;P0DP24;P0DP23;H0Y7A7		CALM2	6.89072	6.90799	6.87073	4.09639	4.09825	4.07069	10.7301	10.7474	10.7101					14	14	1	8.7	16837	323.31	248660000000	488	149	9
53	6.889	7.7639e+06	Q1	P25398	P25398	40S ribosomal protein S12	RPS12	6.78407	6.94014	6.94207	3.98974	4.1304	4.14203	10.5143	10.6704	10.6723					11	11	11	75.8	14515	291.57	162390000000	289	132	7
54	6.888	7.74847e+06	Q1	P60866;P60866-2;G3XAN0;E5RJX2;E5RIP1	P60866;P60866-2;G3XAN0	40S ribosomal protein S20	RPS20	6.84177	6.93252	6.88862	4.04744	4.12279	4.08857	10.4259	10.5166	10.4727					7	7	7	52.9	13373	58.293	118240000000	170	119	5
55	6.886	7.70319e+06	Q1	P31146;H3BRY3;H3BRJ0	P31146;H3BRY3	Coronin-1A;Coronin	CORO1A	6.86496	6.91791	6.87532	4.07062	4.10817	4.07527	10.9806	11.0335	10.9909					43	43	25	33.6	51026	323.31	372780000000	829	461	17
56	6.885	7.70064e+06	Q1	P25705;P25705-2;P25705-3;K7EK77;K7ENJ4;K7ERX7;K7EJP1;K7EQH4;K7ESA0;K7EM08	P25705;P25705-2;P25705-3	ATP synthase subunit alpha, mitochondrial	ATP5A1	6.86853	6.86031	6.92758	4.0742	4.05058	4.12754	11.2308	11.2226	11.2899					49	49	49	72.2	59750	323.31	665070000000	865	553	30
57	6.884	7698946	Q1	P37802;X6RJP6;P37802-2;C9J5W6	P37802;X6RJP6;P37802-2	Transgelin-2	TAGLN2	6.90889	6.8888	6.85523	4.11456	4.07907	4.05518	10.908	10.8879	10.8543					25	25	24	87.9	22391	323.31	327160000000	625	199	13
58	6.876	7.69167e+06	Q1	Q01105;A0A0C4DFV9;Q01105-3;Q01105-4;B2REB7	Q01105;A0A0C4DFV9;Q01105-3;Q01105-4	Protein SET	SET	6.86346	6.99892	6.76488	4.06913	4.18918	3.96483	10.6517	10.7872	10.5531					17	17	4	10.7	33488	323.31	193800000000	608	290	8
59	6.874	7.67132e+06	Q1	Q14103-3;Q14103;H0YA96;H0Y8G5;Q14103-4;Q14103-2;D6RAF8;D6RD83;D6RF44;D6RBQ9	Q14103-3;Q14103;H0YA96;H0Y8G5;Q14103-4;Q14103-2;D6RAF8	Heterogeneous nuclear ribonucleoprotein D0	HNRNPD	6.88835	6.89437	6.84009	4.09402	4.08463	4.04004	10.8527	10.8587	10.8044					27	27	25	47.7	32834	323.31	274440000000	483	306	12
60	6.873	7510264	Q1	P61604;B8ZZL8;B8ZZ54	P61604;B8ZZL8	10 kDa heat shock protein, mitochondrial	HSPE1	6.8285	6.88137	6.91042	4.03416	4.07164	4.11038	10.5887	10.6416	10.6706					13	6	6	40.2	10932	80.513	156140000000	127	102	7.5
61	6.873	7.49789e+06	Q1	P00558;P00558-2	P00558;P00558-2	Phosphoglycerate kinase 1	PGK1	6.88861	6.86134	6.86784	4.09427	4.0516	4.06779	11.197	11.1697	11.1762					36	36	31	70.7	44614	323.31	613020000000	812	417	26.5
62	6.872	7494497	Q1	P11021	P11021	78 kDa glucose-regulated protein	HSPA5	6.85516	6.90922	6.85231	4.06083	4.09949	4.05226	11.2174	11.2715	11.2146					61	61	60	68.7	72332	323.31	660270000000	1174	654	30
63	6.872	7.46499e+06	Q1	P63313	P63313	Thymosin beta-10	TMSB10	7.01867	6.75374	6.84284	4.22434	3.94401	4.04279	10.2049	9.93992	10.029					2	1	1	31.8	5025.6	6.7302	56775000000	81	44	2
64	6.87	7460217	Q1	P19338;C9JYW2;C9JLB1;C9J1H7;C9JWL1	P19338	Nucleolin	NCL	6.83491	6.90294	6.87294	4.04058	4.0932	4.07289	11.2641	11.3322	11.3022					48	48	20	18.3	76613	323.31	779440000000	1056	710	35
65	6.868	7.43279e+06	Q1	P63241;I3L397;I3L504;P63241-2;Q6IS14	P63241;I3L397;I3L504;P63241-2;Q6IS14	Eukaryotic translation initiation factor 5A-1;Eukaryotic translation initiation factor 5A;Eukaryotic translation initiation factor 5A-1-like	EIF5A;EIF5AL1	6.93489	6.92144	6.74647	4.14055	4.1117	3.94642	10.7231	10.7097	10.5347					14	14	10	59.1	16832	323.31	178230000000	425	154	8
66	6.864	7.32286e+06	Q1	Q9P1F3;Q5SZC9	Q9P1F3	Costars family protein ABRACL	ABRACL	6.85032	6.90558	6.83493	4.05598	4.09585	4.03488	10.2126	10.2678	10.1972					4	4	4	76.5	9056.4	110.24	69850000000	124	81	3
67	6.863	7.31633e+06	Q1	P07900;P07900-2;G3V2J8	P07900;P07900-2	Heat shock protein HSP 90-alpha	HSP90AA1	6.82184	6.85339	6.9127	4.02751	4.04366	4.11265	11.2752	11.3067	11.366					75	55	46	47	84659	323.31	801020000000	1504	732	37
68	6.859	7.28851e+06	Q1	O00148;O00148-2;O00148-3;K7EQN7;K7EPJ3;K7EN69;K7EIL8;K7ENP6;K7EL56;F6SXL5	O00148;O00148-2;O00148-3;K7EQN7	ATP-dependent RNA helicase DDX39A	DDX39A	6.85879	6.8772	6.84014	4.06445	4.06747	4.04009	10.7853	10.8037	10.7667					37	37	13	45.2	49129	323.31	251990000000	560	427	11
69	6.858	7.25996e+06	Q1	E9PAV3;F8VZJ2;H0YHX9;Q13765;E9PAV3-2;F8W0W4;F8W1N5;F8VNW4;F8VZ58	E9PAV3;F8VZJ2;H0YHX9;Q13765;E9PAV3-2;F8W0W4;F8W1N5;F8VNW4	Nascent polypeptide-associated complex subunit alpha, muscle-specific form;Nascent polypeptide-associated complex subunit alpha	NACA	6.87078	6.9149	6.78767	4.07644	4.10517	3.98762	10.5341	10.5782	10.451					10	10	9	9.4	205420	323.31	113400000000	184	2078	6
70	6.844	7227229	Q1	Q5JP53;P07437;Q5ST81;A6NNZ2;M0R1I1	Q5JP53;P07437;Q5ST81	Tubulin beta chain	TUBB	6.99419	6.85666	6.68211	4.19985	4.04693	3.88206	11.1581	11.0206	10.846					39	9	8	19.2	47766	323.31	457490000000	660	426	19
71	6.84	6.92654e+06	Q1	P52566;F5H3P3;F5H6Q0;F5H2R5	P52566;F5H3P3;F5H6Q0	Rho GDP-dissociation inhibitor 2	ARHGDIB	6.83089	6.84079	6.84966	4.03656	4.03105	4.04962	10.716	10.7259	10.7348					16	16	3	20.9	22988	323.31	214680000000	320	201	10
72	6.838	6903155	Q1	P35268;K7ERI7;K7ELC4;K7EMH1;K7EP65;K7EKS7;K7EJT5	P35268;K7ERI7;K7ELC4;K7EMH1;K7EP65;K7EKS7	60S ribosomal protein L22	RPL22	6.82719	6.86933	6.81893	4.03285	4.0596	4.01888	10.2564	10.2986	10.2482					8	8	6	53.1	14787	206.93	68993000000	110	128	3.5
73	6.832	6.89223e+06	Q1	Q8WVC2;P63220;Q9BYK1;Q9BYK2	Q8WVC2;P63220;Q9BYK1	40S ribosomal protein S21	RPS21	6.865	6.90377	6.72721	4.07067	4.09403	3.92716	10.4491	10.4879	10.3113					9	9	9	74.1	8850	323.31	128600000000	225	81	5
74	6.831	6.88049e+06	Q1	P62851	P62851	40S ribosomal protein S25	RPS25	6.88056	6.85085	6.76098	4.08623	4.04111	3.96093	10.4647	10.435	10.3451					7	7	7	36.8	13742	23.769	95081000000	147	125	5
75	6.83	6.81877e+06	Q1	P62328;CON__P21752	P62328	Thymosin beta-4;Hematopoietic system regulatory peptide	TMSB4X	6.83982	6.92572	6.72412	4.04549	4.11599	3.92407	10.026	10.1119	9.9103					4	4	3	61.4	5052.6	39.613	53045000000	66	44	2
76	6.823	6.65444e+06	Q1	P52565;J3KTF8;J3QQX2;J3KRE2;P52565-2;J3KRY1;J3KS60	P52565;J3KTF8;J3QQX2;J3KRE2;P52565-2;J3KRY1	Rho GDP-dissociation inhibitor 1	ARHGDIA	6.82083	6.82575	6.82275	4.02649	4.01601	4.0227	10.581	10.586	10.583					22	22	22	80.9	23207	323.31	186420000000	387	204	7.5
77	6.817	6.59771e+06	Q1	P51991;H7C1J8	P51991	Heterogeneous nuclear ribonucleoprotein A3	HNRNPA3	6.80347	6.82864	6.81787	4.00913	4.0189	4.01782	10.9674	10.9925	10.9818					42	38	7	9	39594	323.31	366490000000	908	378	19
78	6.815	6.5581e+06	Q1	P49773;D6REP8;D6RE99;D6RC06	P49773	Histidine triad nucleotide-binding protein 1	HINT1	6.87408	6.84431	6.72613	4.07975	4.03458	3.92609	10.6623	10.6326	10.5144					13	13	7	52.4	13802	323.31	196010000000	252	126	8
79	6.813	6532257	Q1	P23284	P23284	Peptidyl-prolyl cis-trans isomerase B	PPIB	6.80671	6.8716	6.75955	4.01238	4.06187	3.95951	10.771	10.8359	10.7239					22	22	22	67.1	23742	287.04	224750000000	361	216	12
80	6.811	6.50133e+06	Q1	P63244;J3KPE3;D6RAC2;H0YAF8;D6RHH4;H0Y8W2;D6REE5;H0YAM7;D6R9Z1;D6R9L0;D6RAU2;E9PD14;D6RFX4;D6RFZ9;D6RBD0;D6RF23;D6RHJ5;D6R909;H0Y8R5;D6RGK8;H0Y9P0;D6RDI0	P63244;J3KPE3;D6RAC2;H0YAF8;D6RHH4;H0Y8W2;D6REE5;H0YAM7;D6R9Z1;D6R9L0;D6RAU2;E9PD14;D6RFX4;D6RFZ9	Guanine nucleotide-binding protein subunit beta-2-like 1;Guanine nucleotide-binding protein subunit beta-2-like 1, N-terminally processed	GNB2L1	6.82164	6.86156	6.74833	4.0273	4.05182	3.94828	10.8829	10.9228	10.8096					30	30	30	94.6	35076	323.31	290980000000	527	317	15
81	6.803	6.35078e+06	Q1	P46777;Q5T7N0;R4GNJ2	P46777	60S ribosomal protein L5	RPL5	6.79745	6.81153	6.79937	4.00311	4.0018	3.99932	10.724	10.7381	10.7259					26	26	26	71	34362	255.9	219090000000	469	297	11
82	6.799	6.31739e+06	Q1	P61247;D6RAT0;D6RG13;E9PFI5;H0Y8L7;D6RB09;H0Y9Y4;D6R9B6;D6RAS7;D6RED7;D6RI02;D6RGE0	P61247;D6RAT0;D6RG13;E9PFI5;H0Y8L7;D6RB09;H0Y9Y4;D6R9B6	40S ribosomal protein S3a	RPS3A	6.81451	6.82425	6.7587	4.02018	4.01452	3.95865	10.83	10.8397	10.7742					32	32	32	72	29945	323.31	275410000000	471	264	13.5
83	6.797	6.311e+06	Q1	P46778;M0R181;G3V1B3	P46778;M0R181	60S ribosomal protein L21	RPL21	6.87187	6.76748	6.75226	4.07753	3.95775	3.95221	10.456	10.3516	10.3364					9	9	9	49.4	18565	81.392	97154000000	227	160	5
84	6.792	6.19191e+06	Q1	P29401;P29401-2;E9PFF2;F8W888;F8WAX4	P29401;P29401-2	Transketolase	TKT	6.77794	6.81019	6.78669	3.98361	4.00046	3.98665	11.0696	11.1019	11.0784					48	48	9	24.4	67877	323.31	504750000000	852	623	25.5
85	6.787	6.13612e+06	Q1	P05388-2	P05388-2			6.75231	6.784	6.82436	3.95798	3.97427	4.02431	10.7514	10.7831	10.8234					21	21	1	3.5	27435	323.31	229540000000	373	255	13
86	6.784	6.11622e+06	Q1	P18669;P15259;Q8N0Y7	P18669	Phosphoglycerate mutase 1	PGAM1	6.74798	6.76309	6.84235	3.95364	3.95336	4.04231	10.7471	10.7622	10.8415					22	22	22	83.1	28804	323.31	248450000000	526	254	13
87	6.774	6.09749e+06	Q1	Q00839;Q00839-2;A0A1W2PPS1;A0A1W2PP35;A0A1X7SBS1;Q5RI18;A0A1W2PPH7;A0A1W2PPL4;A0A1W2PQL0;A0A1W2PP34;A0A1W2PQ74;A0A1W2PRZ7;A0A1W2PQD4;A0A1W2PRI6;A0A1W2PPE9;A0A1W2PNG3;A0A087WVI9;A0A087WZF3;A0A1W2PP22	Q00839;Q00839-2;A0A1W2PPS1;A0A1W2PP35;A0A1X7SBS1;Q5RI18;A0A1W2PPH7;A0A1W2PPL4;A0A1W2PQL0;A0A1W2PP34;A0A1W2PQ74;A0A1W2PRZ7	Heterogeneous nuclear ribonucleoprotein U	HNRNPU	6.73178	6.78837	6.80289	3.93745	3.97864	4.00284	11.1012	11.1578	11.1723					60	60	60	60.6	90583	323.31	558180000000	1119	825	30.5
88	6.773	5.96231e+06	Q1	Q15365	Q15365	Poly(rC)-binding protein 1	PCBP1	6.78953	6.78499	6.74569	3.9952	3.97525	3.94564	10.9051	10.9006	10.8613					20	20	14	73.9	37497	323.31	312880000000	626	356	17
89	6.773	5.94247e+06	Q1	P50395;P50395-2;Q5SX87;Q5SX86;Q5SX91;V9GYF8;Q5SX90;V9GYJ7	P50395;P50395-2;Q5SX87	Rab GDP dissociation inhibitor beta	GDI2	6.73582	6.80678	6.7764	3.94149	3.99705	3.97635	11.0189	11.0899	11.0595					50	50	39	72.4	50663	323.31	449200000000	994	445	25
90	6.77	5.94079e+06	Q1	P60842;J3KT12;P60842-2;J3QS69;J3KTB5;J3KSZ0;J3QL43;J3KTN0;J3QR64;J3KS25;J3QL52;J3KS93;J3KT04;J3QQP0	P60842;J3KT12;P60842-2;J3QS69;J3KTB5;J3KSZ0;J3QL43	Eukaryotic initiation factor 4A-I	EIF4A1	6.75593	6.78267	6.77084	3.9616	3.97294	3.97079	10.8964	10.9231	10.9113					43	38	17	37.2	46153	323.31	381990000000	843	406	18
91	6.767	5887796	Q1	P62244;I3L3P7;I3L246;H3BV27;H3BT37;I3L303;H3BVC7	P62244;I3L3P7;I3L246	40S ribosomal protein S15a	RPS15A	6.81589	6.75391	6.73144	4.02155	3.94418	3.9314	10.5461	10.4842	10.4617					14	14	6	37.7	14839	323.31	121830000000	232	130	7
92	6.764	5.88418e+06	Q1	P15880;H0YEN5;E9PQD7;E9PMM9;I3L404;E9PM36;E9PPT0;H3BNG3;H0YE27	P15880;H0YEN5;E9PQD7;E9PMM9;I3L404;E9PM36;E9PPT0	40S ribosomal protein S2	RPS2	6.77673	6.7244	6.78939	3.98239	3.91467	3.98934	10.7411	10.6887	10.7537					22	22	22	71.3	31324	165.28	193230000000	407	293	12
93	6.763	5.86904e+06	Q1	P84103-2;P84103;A0A087X2D0	P84103-2;P84103;A0A087X2D0	Serine/arginine-rich splicing factor 3	SRSF3	6.64922	6.8207	6.81797	3.85489	4.01097	4.01792	10.3795	10.551	10.5482					12	11	11	75	14203	197.21	114030000000	231	124	7
94	6.756	5813047	Q1	Q71UI9;P0C0S5;C9J0D1;Q71UI9-4;Q71UI9-2;Q71UI9-3;C9J386;Q71UI9-5	Q71UI9;P0C0S5;C9J0D1;Q71UI9-4;Q71UI9-2;Q71UI9-3;C9J386	Histone H2A.V;Histone H2A.Z;Histone H2A	H2AFV;H2AFZ	6.54679	6.77844	6.94283	3.75246	3.9687	4.14278	10.1309	10.3626	10.5269	+				6	4	4	46.9	13509	100.44	80595000000	248	128	5
95	6.752	5.77314e+06	Q1	P62888;E5RI99;A0A0B4J213;A0A0C4DH44;E5RJH3	P62888;E5RI99	60S ribosomal protein L30	RPL30	6.74557	6.79618	6.71517	3.95123	3.98645	3.91512	10.4089	10.4595	10.3785					9	9	9	68.7	12784	173.42	84387000000	146	115	6
96	6.752	5.67021e+06	Q1	P15311;E7EQR4;E9PNP4	P15311;E7EQR4	Ezrin	EZR	6.73609	6.75519	6.76347	3.94176	3.94546	3.96342	11.1331	11.1522	11.1605					69	69	54	56.3	69412	323.31	579020000000	1164	586	32.5
97	6.747	5.6459e+06	Q1	P01871;A0A1B0GUU9;P01871-2;P04220	P01871;A0A1B0GUU9;P01871-2;P04220	Ig mu chain C region;Ig mu heavy chain disease protein	IGHM	6.71111	6.81933	6.71034	3.91678	4.0096	3.91029	10.958	11.0662	10.9572					27	27	27	69.1	49439	323.31	404620000000	687	453	23
98	6.746	5623729	Q1	P61353;K7ELC7;K7EQQ9;K7ERY7	P61353;K7ELC7;K7EQQ9	60S ribosomal protein L27	RPL27	6.75003	6.73834	6.75079	3.9557	3.92861	3.95074	10.4133	10.4016	10.4141					9	9	9	51.5	15798	195.86	100080000000	159	136	6
99	6.744	5.57959e+06	Q1	P06744;A0A0A0MTS2;P06744-2;K7EQ48;A0A0J9YXP8;A0A0J9YYH3;A0A0J9YX90;K7EPY4;K7EP41;K7ENA0;K7ERC6;K7ELR7;K7ERK8;K7EIL4;Q8N196	P06744;A0A0A0MTS2;P06744-2;K7EQ48;A0A0J9YXP8;A0A0J9YYH3;A0A0J9YX90	Glucose-6-phosphate isomerase	GPI	6.6901	6.73099	6.81005	3.89576	3.92126	4.01001	10.9177	10.9586	11.0376					43	43	30	49.1	63146	323.31	389770000000	883	558	22
100	6.742	5.57729e+06	Q1	Q9UQ80;Q9UQ80-2;F8VR77;F8W0A3;H0YIN7;F8VZ69	Q9UQ80;Q9UQ80-2;F8VR77	Proliferation-associated protein 2G4	PA2G4	6.68392	6.75172	6.78909	3.88959	3.94198	3.98904	10.8478	10.9156	10.953					37	37	37	84.3	43786	323.31	322590000000	677	394	19
101	6.738	5542825	Q1	P17987;E7EQR6;E7ERF2;F5H282;F5GZ03;F5GZI8;F5GYL4;F5H7Y1	P17987;E7EQR6;E7ERF2;F5H282	T-complex protein 1 subunit alpha	TCP1	6.71026	6.72489	6.77959	3.91593	3.91516	3.97955	10.9278	10.9425	10.9972					43	43	33	67.1	60343	323.31	370710000000	817	556	21.5
102	6.735	5486373	Q1	B8ZZQ6;P06454-2;P06454;B8ZZA1;B8ZZW7;H7C2N1	B8ZZQ6;P06454-2;P06454;B8ZZA1;B8ZZW7;H7C2N1	Prothymosin alpha;Prothymosin alpha, N-terminally processed;Thymosin alpha-1	PTMA	6.94159	6.66083	6.60187	4.14726	3.85109	3.80182	10.3708	10.09	10.0311					9	9	9	46.7	11758	323.31	77903000000	265	107	3.5
103	6.729	5.35749e+06	Q1	P32969;H0Y9V9;D6RAN4;E7ESE0;H0Y9R4	P32969;H0Y9V9;D6RAN4;E7ESE0	60S ribosomal protein L9	RPL9	6.75082	6.7145	6.72069	3.95649	3.90477	3.92064	10.5654	10.5291	10.5353					14	14	14	70.3	21863	323.31	138310000000	335	192	8.5
104	6.725	5.33011e+06	Q1	Q13185;S4R2Y4	Q13185;S4R2Y4	Chromobox protein homolog 3	CBX3	6.67968	6.7703	6.72551	3.88535	3.96056	3.92546	10.2638	10.3544	10.3096					14	14	7	48.6	20811	148.86	100790000000	261	183	5
105	6.724	5.31722e+06	Q1	P27797;K7EJB9;K7EL50	P27797;K7EJB9	Calreticulin	CALR	6.70232	6.73887	6.73046	3.90799	3.92914	3.93041	10.8428	10.8793	10.8709					32	32	32	75.3	48141	323.31	300550000000	830	417	18
106	6.722	5298653	Q1	P00441;H7BYH4	P00441;H7BYH4	Superoxide dismutase [Cu-Zn]	SOD1	6.67268	6.69327	6.80007	3.87834	3.88354	4.00002	10.4329	10.4535	10.5603					12	12	12	75.3	15936	323.31	102610000000	205	154	7.5
107	6.718	5.24213e+06	Q1	P30101	P30101	Protein disulfide-isomerase A3	PDIA3	6.69922	6.76485	6.68964	3.90489	3.95512	3.88959	11.0468	11.1124	11.0372					51	50	43	62	56782	323.31	443290000000	795	505	29
108	6.716	5.23857e+06	Q1	P12004	P12004	Proliferating cell nuclear antigen	PCNA	6.75676	6.66411	6.72758	3.96242	3.85437	3.92753	10.846	10.7534	10.8169					23	23	23	92.7	28768	323.31	277110000000	519	261	16
109	6.716	5.22212e+06	Q1	P84077	P84077	ADP-ribosylation factor 1	ARF1	6.75142	6.76328	6.63211	3.95709	3.95355	3.83207	10.6366	10.6484	10.5173					22	22	4	21.5	20697	323.31	174550000000	467	181	10
110	6.71	5.21386e+06	Q1	P61956-2;P61956	P61956-2;P61956	Small ubiquitin-related modifier 2	SUMO2	6.72329	6.80109	6.60511	3.92896	3.99136	3.80506	10.0064	10.0842	9.8882					4	4	2	19.7	8111.1	58.292	36137000000	54	71	2.5
111	6.706	5.09606e+06	Q1	P30050;P30050-2	P30050;P30050-2	60S ribosomal protein L12	RPL12	6.74209	6.70393	6.67291	3.94775	3.8942	3.87287	10.5303	10.4922	10.4611					12	12	12	72.1	17818	209.17	118420000000	146	165	8
112	6.704	5.09219e+06	Q1	P46783;Q9NQ39	P46783	40S ribosomal protein S10	RPS10	6.66451	6.70113	6.74553	3.87018	3.89139	3.94549	10.4527	10.4894	10.5338					16	16	2	9.1	18898	269.8	118780000000	270	165	8
113	6.703	5.06979e+06	Q1	P32119;A6NIW5;P32119-2	P32119;A6NIW5	Peroxiredoxin-2	PRDX2	6.68217	6.64674	6.78052	3.88784	3.837	3.98048	10.5673	10.5319	10.6657					16	15	15	64.6	21892	323.31	136870000000	183	198	10
114	6.702	5.0372e+06	Q1	P40925;P40925-3;B9A041;P40925-2;B8ZZ51;C9JF79;C9JRL4;C9JLV6;C9IZI0;F8WFC2	P40925;P40925-3;B9A041;P40925-2;B8ZZ51	Malate dehydrogenase, cytoplasmic	MDH1	6.71525	6.69703	6.69398	3.92092	3.88729	3.89394	10.6796	10.6614	10.6583					17	17	17	62.9	36426	271.6	175240000000	254	334	12
115	6.701	5.03196e+06	Q1	P78371;P78371-2;F5GWF6;F8VQ14	P78371;P78371-2;F5GWF6;F8VQ14	T-complex protein 1 subunit beta	CCT2	6.67944	6.71857	6.70629	3.8851	3.90884	3.90624	11.0417	11.0808	11.0686					45	45	45	86.7	57488	323.31	475130000000	1047	535	30
116	6.699	5.01159e+06	Q1	P22234;E9PBS1;P22234-2;D6RF62	P22234;E9PBS1;P22234-2;D6RF62	Multifunctional protein ADE2;Phosphoribosylaminoimidazole-succinocarboxamide synthase;Phosphoribosylaminoimidazole carboxylase	PAICS	6.71627	6.712	6.67018	3.92194	3.90227	3.87013	10.8802	10.8759	10.8341					41	41	41	85.4	47079	323.31	290920000000	558	425	19
117	6.697	4.981e+06	Q1	P40227;P40227-2	P40227;P40227-2	T-complex protein 1 subunit zeta	CCT6A	6.69168	6.70898	6.69105	3.89735	3.89924	3.891	10.9748	10.9921	10.9741					39	39	33	68.7	58024	323.31	384610000000	840	531	25
118	6.688	4.97754e+06	Q1	P36578;H3BM89;H3BTP7;H3BU31	P36578;H3BM89	60S ribosomal protein L4	RPL4	6.80926	6.59933	6.65438	4.01493	3.7896	3.85433	10.8247	10.6148	10.6699					33	33	33	56	47697	323.31	193860000000	349	427	13.5
119	6.686	4.88239e+06	Q1	P43487-2;P43487;F6WQW2;C9JXG8;C9JJ34;C9JGV6;C9JDM3;C9JIC6;Q5T0Z6;Q9C010;Q9C010-2	P43487-2;P43487;F6WQW2;C9JXG8	Ran-specific GTPase-activating protein	RANBP1	6.68088	6.68126	6.6956	3.88654	3.87153	3.89556	10.4691	10.4695	10.4838					15	15	15	69.5	23239	323.31	127560000000	205	200	8
120	6.686	4865729	Q1	A0A0U1RRM4;A0A0D9SF20;K7EK45;A0A087WUW5;K7ELW5;K7EKX4	A0A0U1RRM4			6.6536	6.67098	6.73281	3.85927	3.86125	3.93277	10.8398	10.8572	10.919					26	26	1	4.1	62463	323.31	329750000000	814	588	20
121	6.681	4.85251e+06	Q1	P62269;J3JS69;A0A0G2JQH2;Q5GGW2	P62269	40S ribosomal protein S18	RPS18	6.74548	6.62193	6.67532	3.95115	3.81219	3.87527	10.5849	10.4613	10.5147					16	16	16	59.9	17718	134.22	132570000000	219	152	9
122	6.674	4.82912e+06	Q1	P08708;H0YN88;A0A075B716;H0YN73;H3BNC9	P08708;H0YN88;A0A075B716	40S ribosomal protein S17	RPS17	6.69265	6.72321	6.60689	3.89832	3.91348	3.80684	10.3559	10.3865	10.2702					12	12	12	69.6	15550	240.71	102470000000	380	135	6
123	6.673	4.75317e+06	Q1	P08243;P08243-2;P08243-3;F8WEJ5;C9J057;C9JT45;C9JM09;C9JLN6;C9JLA3;C9J605	P08243;P08243-2;P08243-3;F8WEJ5	Asparagine synthetase [glutamine-hydrolyzing]	ASNS	6.69498	6.65743	6.66804	3.90064	3.8477	3.868	11.0034	10.9658	10.9764					54	54	54	87.3	64369	323.31	387790000000	909	561	26.5
124	6.671	4.74868e+06	Q1	P62249;M0R210;M0R3H0;M0R1M5;Q6IPX4;M0QX76	P62249;M0R210;M0R3H0;M0R1M5	40S ribosomal protein S16	RPS16	6.76892	6.61564	6.62789	3.97459	3.8059	3.82785	10.5835	10.4302	10.4425					17	17	17	74	16445	52.601	114790000000	222	146	8.5
125	6.67	4.71816e+06	Q1	P56279;G3V4T4;H0YJR9	P56279	T-cell leukemia/lymphoma protein 1A	TCL1A	6.69306	6.81626	6.5003	3.89873	4.00652	3.70026	10.4233	10.5465	10.2305					13	13	13	88.6	13459	217.36	111650000000	334	114	7
126	6.665	4.6252e+06	Q1	P62750;H7BY10;K7EJV9;K7ERT8;A8MUS3;K7EMA7	P62750;H7BY10;K7EJV9;K7ERT8;A8MUS3	60S ribosomal protein L23a	RPL23A	6.67057	6.65943	6.66532	3.87623	3.8497	3.86528	10.4008	10.3897	10.3956					17	17	17	57.7	17695	159.45	90891000000	185	156	7
127	6.663	4.61962e+06	Q1	O43175;Q5SZU1	O43175;Q5SZU1	D-3-phosphoglycerate dehydrogenase	PHGDH	6.64346	6.70278	6.64399	3.84913	3.89305	3.84394	10.8808	10.9401	10.8813					31	31	31	68.3	56650	323.31	315650000000	638	533	22.5
128	6.662	4.6195e+06	Q1	P48643;E7ENZ3;B7ZAR1;E9PCA1;P48643-2;D6RIZ7;H0Y914	P48643;E7ENZ3;B7ZAR1;E9PCA1;P48643-2	T-complex protein 1 subunit epsilon	CCT5	6.67055	6.69015	6.62432	3.87622	3.88042	3.82427	11.0328	11.0524	10.9866					53	53	53	86.5	59670	323.31	448490000000	1211	541	30
129	6.658	4.61654e+06	Q1	P62942;Q5W0X3;Q1JUQ5;A0A087WZM5;Q5VVH2;Q1JUQ3;A0A087WTS4;A0A087WV48	P62942;Q5W0X3;Q1JUQ5;A0A087WZM5	Peptidyl-prolyl cis-trans isomerase FKBP1A;Peptidyl-prolyl cis-trans isomerase	FKBP1A;FKBP12-Exip2	6.64756	6.7546	6.57214	3.85323	3.94487	3.7721	10.0098	10.1169	9.93441					10	10	10	86.1	11951	323.31	45335000000	124	108	3
130	6.657	4597703	Q1	Q59GN2;P62891	Q59GN2;P62891	Putative 60S ribosomal protein L39-like 5;60S ribosomal protein L39	RPL39P5;RPL39	6.58008	6.73439	NaN	3.78575	3.92466	NaN	9.46523	9.61954	NaN					1	1	1	19.6	6322.5	8.0822	8177200000	36	51	1
131	6.656	4.55565e+06	Q1	P16949;P16949-2;A2A2D0;E5RIR6;E7EVN3;Q9H169-3;Q9H169;Q9H169-4;Q9H169-2	P16949;P16949-2;A2A2D0	Stathmin	STMN1	6.71135	6.59974	6.65741	3.91702	3.79	3.85737	10.4996	10.388	10.4457					20	20	15	55	17302	91.878	108790000000	149	149	8
132	6.654	4.53008e+06	Q1	P05141;Q9H0C2	P05141	ADP/ATP translocase 2;ADP/ATP translocase 2, N-terminally processed	SLC25A5	6.64841	6.6536	6.66065	3.85407	3.84387	3.86061	10.8123	10.8175	10.8246					30	30	15	31.2	32852	246.49	237050000000	349	298	19
133	6.654	4510755	Q1	P0DOY2;P0DOY3;P0CF74;A0M8Q6	P0DOY2;P0DOY3;P0CF74	Ig lambda-6 chain C region	IGLC6	6.76682	6.66294	6.53289	3.97249	3.85321	3.73284	10.4971	10.3932	10.2631					6	6	2	27.4	11293	132.32	102390000000	171	106	7
134	6.653	4504610	Q1	G8JLB6;P31943;E9PCY7;H0YB39;D6RBM0;H0YBD7;D6RIU0;D6RFM3;D6RIT2;D6RAM1;E5RGV0;D6R9T0;D6RDU3;D6RJ04;D6RIH9;E7EQJ0;E7EN40;H0YBG7;D6RDL0;E5RGH4;H0YAQ2;D6RF17;D6R9D3;E5RJ94	G8JLB6;P31943;E9PCY7;H0YB39;D6RBM0	Heterogeneous nuclear ribonucleoprotein H;Heterogeneous nuclear ribonucleoprotein H, N-terminally processed	HNRNPH1	6.61165	6.68442	6.66175	3.81732	3.87468	3.8617	10.7272	10.8	10.7774					33	33	20	55.1	51229	323.31	248770000000	721	472	17
135	6.651	4.49272e+06	Q1	P46776;E9PLL6;E9PJD9;E9PLX7;E9PKT2;H0YF34	P46776;E9PLL6;E9PJD9;E9PLX7	60S ribosomal protein L27a	RPL27A	6.68296	6.59864	6.67122	3.88862	3.7889	3.87118	10.2671	10.1828	10.2553					6	6	6	42.6	16561	26.128	69404000000	92	148	5
136	6.648	4.47589e+06	Q1	P62277;J3KMX5;E9PS50	P62277;J3KMX5	40S ribosomal protein S13	RPS13	6.70945	6.52635	6.70825	3.91512	3.71662	3.90821	10.524	10.3409	10.5228					15	15	15	55.6	17222	108.89	107610000000	243	151	8.5
137	6.646	4.47032e+06	Q1	X1WI28;P27635;Q96L21;B8A6G2;A6QRI9	X1WI28;P27635;Q96L21	60S ribosomal protein L10;60S ribosomal protein L10-like	RPL10;RPL10L	6.71511	6.59965	6.62301	3.92078	3.78992	3.82296	10.5034	10.3879	10.4113					15	15	4	19	22975	253.89	121590000000	277	200	8
138	6.646	4.45496e+06	Q1	P62701;Q8TD47;C9JEH7;P22090	P62701	40S ribosomal protein S4, X isoform	RPS4X	6.73491	6.5715	6.63023	3.94058	3.76177	3.83018	10.8242	10.6608	10.7195					27	27	27	70.7	29597	323.31	226750000000	369	263	16
139	6.645	4.44543e+06	Q1	F8VY35;F5H4R6;P55209-2;P55209;F8VUX1;F8W0J6;H0YIV4;F8W020;F8VXI6;H0YH88;H0YHC3;F8VVB5	F8VY35;F5H4R6;P55209-2;P55209;F8VUX1;F8W0J6;H0YIV4;F8W020;F8VXI6	Nucleosome assembly protein 1-like 1	NAP1L1	6.72518	6.65387	6.55547	3.93085	3.84414	3.75542	10.7243	10.653	10.5546					20	20	6	26.1	31020	323.31	196820000000	568	264	13
140	6.645	4.42409e+06	Q1	P27348;E9PG15	P27348;E9PG15	14-3-3 protein theta	YWHAQ	6.59458	6.62193	6.71745	3.80025	3.8122	3.9174	10.5404	10.5678	10.6633					22	18	17	65.3	27764	323.31	147190000000	373	245	11.5
141	6.644	4422227	Q1	P50990;P50990-2;H7C4C8;H7C2U0	P50990;P50990-2	T-complex protein 1 subunit theta	CCT8	6.64312	6.65747	6.63248	3.84879	3.84774	3.83244	11.0846	11.0989	11.0739					53	53	8	12.2	59620	323.31	488150000000	863	548	36
142	6.644	4.41147e+06	Q1	Q9Y3U8;J3QSB5;J3KTD3	Q9Y3U8;J3QSB5	60S ribosomal protein L36	RPL36	6.66695	6.6453	6.62024	3.87262	3.83557	3.82019	10.0292	10.0076	9.98251					15	15	15	55.2	12254	152.37	42921000000	199	105	3
143	6.642	4.41042e+06	Q1	P14866;M0QXS5;P14866-2;M0R1W6;B4DVF8;M0QYL7;H7C464	P14866;M0QXS5;P14866-2	Heterogeneous nuclear ribonucleoprotein L	HNRNPL	6.6009	6.61889	6.70478	3.80657	3.80916	3.90473	10.7648	10.7828	10.8687					40	40	25	55.3	64132	323.31	280860000000	645	589	19
144	6.641	4.4049e+06	Q1	P39687;H0YN26;H7BZ09;O95626;O43423	P39687;H0YN26	Acidic leucine-rich nuclear phosphoprotein 32 family member A	ANP32A	6.66553	6.61797	6.6387	3.87119	3.80824	3.83865	10.5049	10.4574	10.4781					15	15	13	53.8	28585	323.31	118770000000	149	249	9
145	6.64	4.37693e+06	Q1	P39019;A0A075B6E2;M0R2L9;M0QXK4;M0QYF7;M0R140	P39019;A0A075B6E2	40S ribosomal protein S19	RPS19	6.63698	6.55547	6.72744	3.84264	3.74573	3.92739	10.3672	10.2857	10.4577					19	19	19	64.1	16060	139.37	97876000000	146	145	7
146	6.638	4296903	Q1	P39023;G5E9G0;H7C422;H7C3M2;B5MCW2;F8WCR1	P39023;G5E9G0;H7C422;H7C3M2;B5MCW2	60S ribosomal protein L3	RPL3	6.7532	6.56634	6.59363	3.95887	3.75661	3.79358	10.7523	10.5654	10.5927					30	30	29	61	46108	323.31	204040000000	447	403	13
147	6.631	4.28784e+06	Q1	P49368;B4DUR8;P49368-2;E9PRC8;Q5SZX6;Q5SZX9;Q5SZW8;E9PQ35;E9PM09	P49368;B4DUR8;P49368-2	T-complex protein 1 subunit gamma	CCT3	6.59574	6.63984	6.65875	3.80141	3.83011	3.8587	10.9433	10.9874	11.0063					46	46	46	74.9	60533	323.31	427550000000	733	545	29
148	6.628	4.26187e+06	Q1	Q15181;Q5SQT6	Q15181;Q5SQT6	Inorganic pyrophosphatase	PPA1	6.63055	6.64134	6.61132	3.83622	3.83161	3.81128	10.6771	10.6879	10.6578					32	32	32	91.3	32660	323.31	177820000000	414	289	14.5
149	6.628	4.24536e+06	Q1	Q99497;K7ELW0;K7EN27	Q99497;K7ELW0;K7EN27	Protein deglycase DJ-1	PARK7	6.62246	6.63543	6.62532	3.82813	3.8257	3.82527	10.549	10.562	10.5519					19	19	19	85.7	19891	323.31	142330000000	344	189	11
150	6.627	4.24397e+06	Q1	P34897-3;P34897;P34897-2;H0YIZ0;G3V2Y4;G3V5L0;G3V4W5;G3V540;G3V2W0;G3V241;G3V3Y8;G3V4T0;G3V4X0;G3V2E4;G3V2D2;G3V2Y1;G3V3C6	P34897-3;P34897;P34897-2;H0YIZ0	Serine hydroxymethyltransferase, mitochondrial;Serine hydroxymethyltransferase	SHMT2	6.6103	6.64911	6.62221	3.81597	3.83938	3.82216	10.9503	10.9891	10.9622					41	41	40	80.7	53454	323.31	389440000000	669	483	28.5
151	6.624	4.24143e+06	Q1	Q5W0H4;A0A0B4J2C3;P13693;P13693-2;E9PJF7;H0YCX0;Q56UQ5;Q9HAU6	Q5W0H4;A0A0B4J2C3;P13693;P13693-2;E9PJF7	Translationally-controlled tumor protein	TPT1	6.62151	6.7106	6.53992	3.82718	3.90087	3.73987	10.3518	10.4408	10.2702					13	13	2	10.1	21525	174.73	114190000000	267	188	7
152	6.624	4202671	Q1	A0A024R4M0;P46781;B5MCT8;C9JM19;F2Z3C0;A8MXK4	A0A024R4M0;P46781;B5MCT8;C9JM19	40S ribosomal protein S9	RPS9	6.74384	6.53175	6.59598	3.94951	3.72202	3.79593	10.6067	10.3946	10.4588					24	24	24	55.7	22591	95.596	128450000000	250	194	9.5
153	6.621	4198782	Q1	P62241;Q5JR95	P62241;Q5JR95	40S ribosomal protein S8	RPS8	6.65892	6.55935	6.64458	3.86458	3.74962	3.84454	10.4735	10.3739	10.4591					22	22	22	66.8	24205	323.31	113290000000	187	208	8.5
154	6.621	4.15552e+06	Q1	P33316-2;H0YNJ9;H0YMM5	P33316-2;H0YNJ9;H0YMM5	Deoxyuridine 5-triphosphate nucleotidohydrolase, mitochondrial	DUT	6.55079	6.64431	6.66695	3.75646	3.83458	3.86691	10.339	10.4326	10.4552					14	14	1	7.9	17748	323.31	98085000000	255	164	8
155	6.614	4.15329e+06	Q1	P18124;A8MUD9;C9JIJ5;C9JZ88	P18124;A8MUD9	60S ribosomal protein L7	RPL7	6.67306	6.5332	6.63709	3.87872	3.72346	3.83705	10.5996	10.4597	10.5636					25	25	25	65.3	29225	308.78	143490000000	272	248	11
156	6.613	4.10911e+06	Q1	P10412;P22492;Q02539	P10412	Histone H1.4	HIST1H1E	6.54532	6.58666	6.70721	3.75099	3.77693	3.90716	10.3847	10.4261	10.5466	+				10	9	3	9.6	21865	52.387	109170000000	110	219	9
157	6.613	4.08554e+06	Q1	P60660-2;G8JLA2;F8VZU9;F8W180;F8VXL3	P60660-2;G8JLA2;F8VZU9;F8W180	Myosin light polypeptide 6	MYL6	6.62984	6.6416	6.56607	3.8355	3.83187	3.76602	10.515	10.5267	10.4512					14	14	1	17.9	16961	323.31	127250000000	275	151	10
158	6.611	4.06708e+06	Q1	P62829;J3KT29;C9JD32;B9ZVP7;J3KTJ3;J3QQT9	P62829;J3KT29;C9JD32;B9ZVP7	60S ribosomal protein L23	RPL23	6.6338	6.59872	6.60031	3.83947	3.78899	3.80027	10.2971	10.262	10.2636					13	13	13	70	14865	297.64	77615000000	267	140	6
159	6.609	4.06391e+06	Q1	P62258;P62258-2;B4DJF2;I3L3T1;K7EIT4;K7EM20;I3L0W5	P62258;P62258-2	14-3-3 protein epsilon	YWHAE	6.59135	6.63184	6.60365	3.79702	3.82211	3.80361	10.6668	10.7073	10.6791					26	24	24	80	29174	323.31	208470000000	519	255	15.5
160	6.608	4.05318e+06	Q1	P31946-2;P31946;Q4VY19;A0A0J9YWE8;Q4VY20;A0A0J9YWZ2	P31946-2;P31946	14-3-3 protein beta/alpha;14-3-3 protein beta/alpha, N-terminally processed	YWHAB	6.61235	6.57713	6.63538	3.81802	3.7674	3.83533	10.6436	10.6084	10.6667					22	16	14	64.8	27850	323.31	202730000000	534	244	14
161	6.604	4.02544e+06	Q1	P84090;G3V279	P84090;G3V279	Enhancer of rudimentary homolog	ERH	6.56297	6.67915	6.57135	3.76864	3.86942	3.7713	10.1013	10.2175	10.1097					5	5	5	49	12259	204.34	55729000000	134	104	4.5
162	6.604	3.98706e+06	Q1	Q07666;Q07666-3;Q07666-2	Q07666;Q07666-3;Q07666-2	KH domain-containing, RNA-binding, signal transduction-associated protein 1	KHDRBS1	6.59396	6.63002	6.58931	3.79963	3.82028	3.78926	10.4334	10.4694	10.4287					22	22	19	43.6	48227	323.31	118560000000	282	443	9
163	6.6	3.98661e+06	Q1	P12956;P12956-2;B1AHC9	P12956;P12956-2;B1AHC9	X-ray repair cross-complementing protein 6	XRCC6	6.58195	6.62102	6.5981	3.78762	3.81128	3.79805	10.9442	10.9833	10.9604					56	56	56	77.5	69842	323.31	372130000000	921	609	30
164	6.6	3952034	Q1	Q99832;Q99832-3;Q99832-4;Q99832-2;F8WAM2;F8WBP8;A0A0D9SG95	Q99832;Q99832-3;Q99832-4;Q99832-2	T-complex protein 1 subunit eta	CCT7	6.61955	6.60651	6.57453	3.82521	3.79678	3.77448	10.944	10.931	10.899					54	54	54	85.3	59366	323.31	350090000000	880	543	27.5
165	6.594	3.92954e+06	Q1	P28066;P28066-2	P28066;P28066-2	Proteasome subunit alpha type-5	PSMA5	6.57093	6.60845	6.60272	3.77659	3.79871	3.80267	10.4338	10.4713	10.4656					15	15	15	71.4	26411	323.31	117380000000	237	241	9.5
166	6.592	3.92111e+06	Q1	P21796;C9JI87	P21796;C9JI87	Voltage-dependent anion-selective channel protein 1	VDAC1	6.58436	6.635	6.55726	3.79002	3.82526	3.75722	10.6156	10.6663	10.5885					27	27	27	89.4	30772	323.31	174190000000	399	283	14
167	6.592	3.91947e+06	Q1	Q15233;Q15233-2;H7C367;C9IZL7;C9J4X2	Q15233;Q15233-2;H7C367	Non-POU domain-containing octamer-binding protein	NONO	6.5908	6.61619	6.56759	3.79647	3.80646	3.76755	10.777	10.8024	10.7538					48	46	24	50.1	54231	323.31	273560000000	860	471	20
168	6.59	3.90826e+06	Q1	P63173;J3KT73;J3QL01;J3KSP2	P63173;J3KT73;J3QL01;J3KSP2	60S ribosomal protein L38	RPL38	6.63972	6.47841	6.65174	3.84539	3.66868	3.8517	10.002	9.84068	10.014					6	6	5	51.4	8217.8	8.9626	38457000000	61	70	3
169	6.589	3.88799e+06	Q1	S4R3N1;B4DM50	S4R3N1		HSPE1-MOB4	6.63887	6.62326	6.50575	3.84454	3.81353	3.7057	10.7001	10.6845	10.567					16	16	1	11.5	29736	235.64	174810000000	320	261	15
170	6.589	3.8696e+06	Q1	P50991;P50991-2	P50991;P50991-2	T-complex protein 1 subunit delta	CCT4	6.55619	6.57971	6.62998	3.76185	3.76998	3.82993	10.9465	10.97	11.0203					39	39	39	75.7	57924	323.31	402950000000	761	539	32
171	6.588	3.86566e+06	Q1	E5RIW3;E5RJD8;O75347;O75347-2	E5RIW3;E5RJD8;O75347;O75347-2	Tubulin-specific chaperone A	TBCA	6.58349	6.59262	6.58684	3.78916	3.78288	3.7868	10.2816	10.2907	10.2849					13	13	2	11.9	10080	77.538	77836000000	129	84	6.5
172	6.587	3.86415e+06	Q1	P62316;P62316-2;K7ERG4;K7EJB5	P62316;P62316-2;K7ERG4	Small nuclear ribonucleoprotein Sm D2	SNRPD2	6.61646	6.56854	6.5751	3.82212	3.75881	3.77506	10.3467	10.2988	10.3054					14	14	14	74.6	13527	323.31	81949000000	185	118	7
173	6.584	3.85495e+06	Q1	H0YAZ4	H0YAZ4		CNGB3	6.61725	6.51117	6.62381	3.82292	3.70143	3.82376	10.2806	10.1745	10.2871					1	1	1	10.8	12342	2.0518	69955000000	11	111	6
174	6.581	3811923	Q1	P62899;C9JU56;B7Z4E3;B7Z4C8;P62899-3;P62899-2;B8ZZK4;H7C2W9	P62899;C9JU56;B7Z4E3;B7Z4C8;P62899-3;P62899-2;B8ZZK4;H7C2W9	60S ribosomal protein L31	RPL31	6.63968	6.6198	6.48233	3.84535	3.81006	3.68228	10.303	10.2831	10.1456					11	11	11	48	14463	102.48	59665000000	92	125	6
175	6.581	3.78604e+06	Q1	P17844;J3KTA4;P17844-2;J3KRZ1;J3QRQ7;J3QSF1;J3KRX8;J3QR02;X6RLV5;J3QKN9;J3QRN5;J3QS79;J3QLG9;J3QR62	P17844;J3KTA4;P17844-2	Probable ATP-dependent RNA helicase DDX5	DDX5	6.56694	6.61139	6.56344	3.77261	3.80166	3.76339	10.9572	11.0017	10.9537					66	65	52	68.4	69147	323.31	369590000000	792	614	32
176	6.577	3.77526e+06	Q1	Q06323;Q06323-3;Q06323-2;H0YLU2;H0YKK6	Q06323;Q06323-3;Q06323-2	Proteasome activator complex subunit 1	PSME1	6.53205	6.59534	6.6037	3.73771	3.7856	3.80366	10.5933	10.6566	10.6649					23	23	23	70.3	28723	323.31	173120000000	270	249	15
177	6.577	3.71891e+06	Q1	P62308;A8MWD9;Q49AN9;F5H013;C9JVQ0	P62308;A8MWD9;Q49AN9;F5H013;C9JVQ0	Small nuclear ribonucleoprotein G;Putative small nuclear ribonucleoprotein G-like protein 15	SNRPG;SNRPGP15	6.57242	6.56839	6.58973	3.77809	3.75866	3.78968	9.93469	9.93066	9.952					6	6	6	77.6	8496	99.662	41951000000	107	76	3
178	6.57	3.69255e+06	Q1	P38646;H0Y8S0;D6RJI2;H0YBG6;D6RA73	P38646	Stress-70 protein, mitochondrial	HSPA9	6.58459	6.58203	6.54341	3.79026	3.7723	3.74336	11.0495	11.047	11.0083					68	68	67	77	73680	323.31	431970000000	1156	679	38
179	6.566	3665582	Q1	P30086	P30086	Phosphatidylethanolamine-binding protein 1;Hippocampal cholinergic neurostimulating peptide	PEBP1	6.60457	6.55461	6.54014	3.81024	3.74488	3.74009	10.4897	10.4398	10.4253					15	15	15	85	21057	323.31	105000000000	150	187	10
180	6.563	3.66466e+06	Q1	P23526;P23526-2	P23526;P23526-2	Adenosylhomocysteinase	AHCY	6.54543	6.59386	6.55118	3.75109	3.78413	3.75113	10.7093	10.7578	10.7151					33	33	33	64.4	47716	323.31	217080000000	435	432	19
181	6.557	3.61617e+06	Q1	P62854;Q5JNZ5	P62854;Q5JNZ5	40S ribosomal protein S26;Putative 40S ribosomal protein S26-like 1	RPS26;RPS26P11	6.51989	6.58676	6.56544	3.72556	3.77702	3.76539	10.104	10.1709	10.1496					5	5	5	37.4	13015	71.418	45147000000	93	115	5
182	6.556	3.59596e+06	Q1	P62273;P62273-2;A0A087WTT6	P62273;P62273-2	40S ribosomal protein S29	RPS29	6.52431	6.66795	6.4767	3.72998	3.85822	3.67665	9.8074	9.95104	9.75979					5	5	5	50	6676.7	60.041	28219000000	78	56	2.5
183	6.555	3.58225e+06	Q1	P10599;P10599-2	P10599;P10599-2	Thioredoxin	TXN	6.51781	6.59684	6.54912	3.72348	3.78711	3.74908	10.2159	10.2949	10.2472					9	9	9	66.7	11737	46.275	81406000000	138	105	6.5
184	6.554	3.573e+06	Q1	H0YMV8;Q71UM5;C9JLI6;C9J1C5	H0YMV8;Q71UM5;C9JLI6	40S ribosomal protein S27;40S ribosomal protein S27-like	RPS27L	6.55398	6.57341	6.53418	3.75965	3.76368	3.73414	10.0412	10.0606	10.0214					7	7	2	12	11345	78.503	43927000000	84	100	4
185	6.553	3.56119e+06	Q1	P61224;E7ESV4;F5H7Y6;F5GX62;P61224-3;A0A0J9YXB3;A6NIZ1;P61224-4;F5H004;F5H6R7;F5GYB5;P61224-2;F5H0B7;F5H500;F5H077;F5GWU8;F5H491;F5H4H0;F5GYH7;F8WBC0	P61224;E7ESV4;F5H7Y6;F5GX62;P61224-3;A0A0J9YXB3;A6NIZ1;P61224-4;F5H004;F5H6R7	Ras-related protein Rap-1b;Ras-related protein Rap-1b-like protein	RAP1B	6.55207	6.56429	6.54247	3.75773	3.75455	3.74243	10.4149	10.4272	10.4054					17	17	2	16.8	20825	323.31	103520000000	300	184	9.5
186	6.551	3.56024e+06	Q1	P18077;C9K025;F8WBS5;F8WB72	P18077;C9K025;F8WBS5;F8WB72	60S ribosomal protein L35a	RPL35A	6.54557	6.55852	6.55025	3.75124	3.74879	3.7502	10.1297	10.1426	10.1344					11	11	11	68.2	12538	27.178	63636000000	154	110	5
187	6.55	3.54897e+06	Q1	P61586;C9JX21;C9JNR4;Q5JR08;P08134;Q5JR07;E9PQH6;Q5JR05;U3KQA9;U3KQV3;C9JRM1;Q5JR06;E9PN11;E9PLA2	P61586;C9JX21;C9JNR4	Transforming protein RhoA	RHOA	6.52043	6.5989	6.53122	3.7261	3.78917	3.73117	10.3087	10.3871	10.3195					17	17	15	71.5	21768	217.72	82808000000	398	193	8
188	6.55	3494984	Q1	P00491;G3V5M2;G3V2H3;G3V393	P00491;G3V5M2	Purine nucleoside phosphorylase	PNP	6.55048	6.57028	6.52855	3.75615	3.76054	3.7285	10.6531	10.6729	10.6312					26	26	26	90.3	32118	323.31	186030000000	547	289	16.5
189	6.542	3.48497e+06	Q1	P05455;E7ERC4;E9PGX9;E9PFL9	P05455;E7ERC4	Lupus La protein	SSB	6.49683	6.56173	6.56825	3.7025	3.75199	3.7682	10.6124	10.6773	10.6838					39	39	39	67.6	46836	323.31	198550000000	460	408	17
190	6.541	3479071	Q1	Q8WU39;Q8WU39-3;H0Y9L3;D6RII0;Q8WU39-5;Q8WU39-4;Q8WU39-2	Q8WU39	Marginal zone B- and B1-cell-specific protein	MZB1	6.53435	6.52755	6.56173	3.74001	3.71782	3.76169	10.3737	10.3669	10.4011					12	12	12	76.2	20694	323.31	90101000000	202	189	9
191	6.538	3.46855e+06	Q1	P61313;E7EQV9;E7ENU7;E7EX53;P61313-2;E7ERA2	P61313;E7EQV9;E7ENU7;E7EX53	60S ribosomal protein L15;Ribosomal protein L15	RPL15	6.57285	6.51256	6.5285	3.77852	3.70282	3.72846	10.4122	10.352	10.3679					20	20	20	60.8	24146	276.2	100890000000	389	204	9
192	6.536	3.45721e+06	Q1	O75531;E9PJJ8	O75531	Barrier-to-autointegration factor;Barrier-to-autointegration factor, N-terminally processed	BANF1	6.52574	6.52574	6.55605	3.73141	3.71601	3.756	10.189	10.189	10.2194					15	15	15	86.5	10058	145.42	68572000000	143	89	6
193	6.535	3.43934e+06	Q1	P61254;J3QRI7;J3QQQ9;J3QQV1;J3QRC4;J3KTJ8;J3KSS0;J3KS10	P61254;J3QRI7;J3QQQ9;J3QQV1;J3QRC4;J3KTJ8	60S ribosomal protein L26	RPL26	6.60628	6.55641	6.4418	3.81195	3.74668	3.64175	10.2696	10.2197	10.1051					13	13	3	12.4	17258	110.53	62597000000	107	145	6
194	6.532	3.4362e+06	Q1	P23246;P23246-2;H0Y9K7;H0Y9U2	P23246;P23246-2	Splicing factor, proline- and glutamine-rich	SFPQ	6.47637	6.49886	6.62006	3.68203	3.68913	3.82001	10.8164	10.8389	10.9601					57	57	55	58.3	76149	323.31	302890000000	889	707	28.5
195	6.531	3.42021e+06	Q1	P42766;F2Z388	P42766	60S ribosomal protein L35	RPL35	6.418	6.51677	6.65801	3.62367	3.70703	3.85796	9.78027	9.87904	10.0203					11	11	11	47.2	14551	42.821	29201000000	80	123	3
196	6.53	3.4018e+06	Q1	K7ELC2;P62841;K7EM56;A0A0B4J2B4;S4R417;K7EQJ5;K7EJ78;S4R456	K7ELC2;P62841;K7EM56;A0A0B4J2B4;S4R417;K7EQJ5;K7EJ78;S4R456	40S ribosomal protein S15	RPS15	6.51954	6.50363	6.56692	3.72521	3.6939	3.76687	10.1828	10.1669	10.2302					8	8	8	64.5	17723	271.52	79603000000	292	152	6
197	6.527	3.39524e+06	Q1	Q01130;J3KP15;Q01130-2;J3QL05	Q01130;J3KP15;Q01130-2;J3QL05	Serine/arginine-rich splicing factor 2	SRSF2	6.52604	6.52528	6.52831	3.73171	3.71555	3.72826	10.2863	10.2855	10.2885					19	19	17	47.1	25476	323.31	78885000000	236	221	7.5
198	6.526	3.36159e+06	Q1	Q15056	Q15056	Eukaryotic translation initiation factor 4H	EIF4H	6.52819	6.54855	6.50006	3.73386	3.73881	3.70001	10.5273	10.5476	10.4992					29	29	3	13.3	27385	323.31	128340000000	372	248	13
199	6.524	3.35777e+06	Q1	P68133;A6NL76	P68133;A6NL76	Actin, alpha skeletal muscle	ACTA1	6.62192	6.52483	6.4265	3.82759	3.7151	3.62645	10.7501	10.653	10.5547					19	4	2	6.6	42051	28.464	256060000000	235	377	17.5
200	6.524	3349214	Q1	Q16629-4;Q16629;A0A0B4J1Z1;C9JAB2;Q16629-3;Q16629-2;F8WEA1;H7BZZ6	Q16629-4;Q16629;A0A0B4J1Z1;C9JAB2;Q16629-3;Q16629-2	Serine/arginine-rich splicing factor 7	SRSF7	6.50146	6.55251	6.51783	3.70713	3.74277	3.71778	10.316	10.3671	10.3324					15	15	14	46	26012	192.77	90187000000	176	226	8.5
201	6.523	3.34812e+06	Q1	Q9BTT0;Q5TB19;E9PLC4;Q9BTT0-3;Q9BTT0-2;E9PPH5;E9PI45;Q5TB25	Q9BTT0;Q5TB19;E9PLC4;Q9BTT0-3;Q9BTT0-2	Acidic leucine-rich nuclear phosphoprotein 32 family member E	ANP32E	6.62889	6.55136	6.38854	3.83455	3.74162	3.5885	10.2922	10.2147	10.0518					10	10	10	43.3	30692	323.31	53578000000	153	268	6
202	6.523	3.34548e+06	Q1	Q9HB71;Q9HB71-3;Q9HB71-2;B2ZWH1	Q9HB71;Q9HB71-3	Calcyclin-binding protein	CACYBP	6.48399	6.50267	6.58147	3.68966	3.69294	3.78142	10.4483	10.467	10.5458					28	28	28	74.6	26210	323.31	122320000000	295	228	12
203	6.521	3.32094e+06	Q1	P13010;C9JZ81;H7C0H9	P13010	X-ray repair cross-complementing protein 5	XRCC5	6.50698	6.52522	6.53122	3.71265	3.71549	3.73117	10.9719	10.9901	10.9962					70	70	70	87.4	82704	323.31	420000000000	1317	732	38
204	6.52	3.3198e+06	Q1	P52272;P52272-2;A0A087X0X3;M0R2T0;M0R2I7;M0QY96;M0QYL3	P52272;P52272-2;A0A087X0X3	Heterogeneous nuclear ribonucleoprotein M	HNRNPM	6.52237	6.54966	6.48921	3.72804	3.73992	3.68916	11.0796	11.1069	11.0465					70	70	13	19.9	77515	323.31	567820000000	1322	730	47
205	6.517	3.27465e+06	Q1	P62280;M0QZC5;M0R1H5;M0R1H6	P62280;M0QZC5	40S ribosomal protein S11	RPS11	6.62607	6.49643	6.42876	3.83174	3.6867	3.62872	10.489	10.3593	10.2916					20	20	20	63.3	18431	141.81	101540000000	166	158	9.5
206	6.513	3.262e+06	Q1	P61088;F8VSD4;F8VQQ8;F8VV71;Q5JXB2;F8VZ29	P61088;F8VSD4;F8VQQ8;F8VV71;Q5JXB2	Ubiquitin-conjugating enzyme E2 N;Putative ubiquitin-conjugating enzyme E2 N-like	UBE2N;UBE2NL	6.52834	6.4572	6.55424	3.734	3.64746	3.7542	10.3166	10.2454	10.3425					12	12	12	82.2	17138	96.814	80767000000	128	152	8
207	6.513	3.25543e+06	Q1	P62266;D6RD47;D6RDJ2;D6RIX0;D6R9I7	P62266;D6RD47	40S ribosomal protein S23	RPS23	6.48969	6.54934	6.49902	3.69536	3.73961	3.69898	10.153	10.2126	10.1623					10	10	10	49.7	15807	91.918	56844000000	122	143	6
208	6.512	3.23757e+06	Q1	O00299	O00299	Chloride intracellular channel protein 1	CLIC1	6.48975	6.55294	6.49214	3.69541	3.74321	3.6921	10.551	10.6142	10.5534					20	20	20	86.7	26922	302.52	147740000000	333	241	15
209	6.509	3.22712e+06	Q1	P24534;C9JZW3;F2Z2G2;F8WF65	P24534	Elongation factor 1-beta	EEF1B2	6.47397	6.54158	6.51247	3.67964	3.73184	3.71243	10.4383	10.5059	10.4768					16	13	13	66.2	24763	210.99	107270000000	173	225	12
210	6.506	3.2196e+06	Q1	A0A087WXM6;J3QQT2;J3KRX5;A0A0A6YYL6;P18621;P18621-3;J3QLC8;J3KRB3;A0A087WWH0;J3QS96;A0A0A0MRF8;P18621-2;A0A087WY81;J3KSJ0	A0A087WXM6;J3QQT2;J3KRX5;A0A0A6YYL6;P18621;P18621-3;J3QLC8;J3KRB3;A0A087WWH0;J3QS96;A0A0A0MRF8;P18621-2;A0A087WY81	60S ribosomal protein L17	RPL17;RPL17-C18orf32	6.57079	6.44343	6.50285	3.77646	3.6337	3.70281	10.4102	10.2828	10.3422					12	12	12	63.9	19586	211.5	95826000000	241	169	9
211	6.504	3.21308e+06	Q1	P62318-2;P62318;H3BT13	P62318-2;P62318;H3BT13	Small nuclear ribonucleoprotein Sm D3	SNRPD3	6.50046	6.43951	6.57084	3.70612	3.62978	3.77079	10.1638	10.1028	10.2341					9	9	9	64.2	13291	323.31	63271000000	158	120	6
212	6.503	3.18297e+06	Q1	Q99714;Q5H928	Q99714;Q5H928	3-hydroxyacyl-CoA dehydrogenase type-2	HSD17B10	6.45808	6.45559	6.59468	3.66375	3.64585	3.79463	10.4039	10.4014	10.5405					20	20	2	10.7	26923	323.31	111020000000	405	261	11.5
213	6.5	3.15409e+06	Q1	P98179	P98179	RNA-binding protein 3	RBM3	6.50774	6.55782	6.43411	3.71341	3.74809	3.63407	10.296	10.3461	10.2224					11	11	11	71.3	17170	291.19	85014000000	185	157	8
214	6.498	3.12917e+06	Q1	E7ETK0;A0A087WUS0;P62847-2;P62847-3;P62847;P62847-4	E7ETK0;A0A087WUS0;P62847-2;P62847-3;P62847;P62847-4	40S ribosomal protein S24	RPS24	6.52241	6.50289	6.46969	3.72808	3.69316	3.66965	10.1857	10.1662	10.133					6	6	6	35.9	15197	30.028	66127000000	129	131	6
215	6.493	3.08542e+06	Q1	F8WCF6;P59998;P59998-3;H7C0A3;R4GN08;F8WDD7;A0A0A6YYG9;P59998-4;P59998-2;F8WE39;F8WDW3	F8WCF6;P59998;P59998-3;H7C0A3;R4GN08;F8WDD7;A0A0A6YYG9;P59998-4;P59998-2	Actin-related protein 2/3 complex subunit 4	ARPC4-TTLL3;ARPC4	6.52632	6.42792	6.52492	3.73199	3.61819	3.72487	10.3657	10.2673	10.3643					16	16	16	69.6	21058	323.31	83993000000	177	181	9
216	6.489	3075842	Q1	O00410;O00410-3;H0Y8C6;E7ETV3;E7EQT5;E7EV12;C9JMV5;C9JZD8;E7EWK4;E7EX05;C9JQT6;E7ESA1;E7ESZ1;E7ETV8;C9J875;C9JXE0	O00410;O00410-3;H0Y8C6	Importin-5	IPO5	6.49087	6.50449	6.47197	3.69654	3.69476	3.67192	11.1242	11.1378	11.1053					71	71	8	6.1	123630	323.31	560970000000	1581	1097	56
217	6.487	3.07269e+06	Q1	Q7KZF4;H7C597	Q7KZF4	Staphylococcal nuclease domain-containing protein 1	SND1	6.4682	6.50153	6.49215	3.67386	3.6918	3.6921	11.0776	11.111	11.1016					82	82	82	83.4	102000	323.31	503700000000	1112	910	53
218	6.482	3.05046e+06	Q1	P61981	P61981	14-3-3 protein gamma;14-3-3 protein gamma, N-terminally processed	YWHAG	6.49243	6.47192	6.48191	3.6981	3.66218	3.68187	10.5817	10.5612	10.5712					22	17	16	78.5	28302	323.31	147430000000	468	247	16
219	6.48	3.03506e+06	Q1	P20290;H0Y9Y1	P20290	Transcription factor BTF3	BTF3	6.43046	6.50596	6.50396	3.63613	3.69623	3.70392	10.3156	10.3911	10.3891					15	15	3	10.7	22168	323.31	97248000000	316	206	10
220	6.48	3.03055e+06	Q1	P67809;H0Y449;C9J5V9	P67809;H0Y449;C9J5V9	Nuclease-sensitive element-binding protein 1	YBX1	6.3861	6.52709	6.52541	3.59177	3.71736	3.72536	10.3852	10.5262	10.5245					36	36	27	69.4	35924	323.31	119760000000	399	324	13
221	6.479	3.0209e+06	Q1	P61160;P61160-2;F5H6T1;A0A1B0GWD0;A0A1B0GWH0	P61160;P61160-2;F5H6T1	Actin-related protein 2	ACTR2	6.45941	6.49417	6.48361	3.66508	3.68444	3.68356	10.4585	10.4933	10.4827					30	30	30	69.8	44760	323.31	131100000000	396	394	13
222	6.478	3.01675e+06	Q1	P20700;E9PBF6;A0A0D9SFE5;A0A0D9SFY5;A0A0C4DGC5;Q3BDU5;Q5TCI8;P02545-5;P02545-2;P02545-4;P02545-6;P02545-3;P02545	P20700;E9PBF6;A0A0D9SFE5	Lamin-B1	LMNB1	6.43515	6.49196	6.50817	3.64082	3.68223	3.70812	10.7675	10.8243	10.8405					78	78	69	83.1	66408	323.31	267730000000	847	586	28
223	6.475	3.01512e+06	Q1	P30044;P30044-2;P30044-3;P30044-4	P30044;P30044-2;P30044-3;P30044-4	Peroxiredoxin-5, mitochondrial	PRDX5	6.49847	6.44274	6.48479	3.70413	3.63301	3.68474	10.3836	10.3279	10.3699					16	16	16	61.7	22086	323.31	91015000000	270	214	10
224	6.473	3.00462e+06	Q1	P62753;A2A3R5;A2A3R7	P62753;A2A3R5	40S ribosomal protein S6	RPS6	6.56311	6.4381	6.41743	3.76878	3.62837	3.61738	10.2934	10.1684	10.1477					20	20	20	56.2	28680	129.87	67637000000	149	249	7
225	6.472	2.99208e+06	Q1	P11940;E7ERJ7;E7EQV3;P11940-2;A0A087WTT1;H0YBN4;H0YB86;E5RJB9;E5RH24;E5RGH3;H0YAP2;H0YAS6;H0YB75;Q4VXU2;H0YAW6;H0YAS7;E5RHG7;Q4VXU2-2;H0YC10;E5RFD8;E5RGC4;E5RJM8;Q96DU9-2;Q96DU9	P11940;E7ERJ7;E7EQV3;P11940-2;A0A087WTT1	Polyadenylate-binding protein 1;Polyadenylate-binding protein	PABPC1	6.48995	6.48032	6.44669	3.69562	3.67058	3.64664	10.9066	10.8969	10.8633					51	51	8	23.7	70670	323.31	336030000000	666	636	34
226	6.471	2982447	Q1	P35232;C9JW96;E7ESE2;E9PCW0;C9JZ20;P35232-2;D6RBK0	P35232;C9JW96;E7ESE2;E9PCW0;C9JZ20	Prohibitin	PHB	6.40747	6.49405	6.51233	3.61314	3.68431	3.71228	10.4687	10.5553	10.5736					30	30	30	93.4	29804	323.31	134260000000	305	272	15
227	6.47	2.97754e+06	Q1	P60953;Q5JYX0	P60953;Q5JYX0	Cell division control protein 42 homolog	CDC42	6.42129	6.48468	6.50326	3.62696	3.67495	3.70321	10.1815	10.2449	10.2635					10	10	3	14.7	21258	208.94	59282000000	190	191	7.5
228	6.47	2.97601e+06	Q1	J3KTL2;Q07955;Q07955-3;Q07955-2;J3KSR8;J3QQV5;J3KSW7	J3KTL2;Q07955;Q07955-3;Q07955-2;J3KSR8	Serine/arginine-rich splicing factor 1	SRSF1	6.42666	6.50615	6.47609	3.63233	3.69642	3.67604	10.4579	10.5374	10.5074					37	37	36	68.4	28329	323.31	125030000000	397	253	14
229	6.468	2.96969e+06	Q1	P40429;M0QYS1;Q8J015;Q6NVV1;M0QZU1;A0A096LPE0	P40429;M0QYS1;Q8J015	60S ribosomal protein L13a	RPL13A;RPL13a	6.55429	6.36977	6.48015	3.75996	3.56004	3.6801	10.3937	10.2092	10.3195					16	16	16	61.1	23577	109.25	78957000000	212	203	9
230	6.465	2.95896e+06	Q1	P12268;H0Y4R1;E7ETK5	P12268;H0Y4R1;E7ETK5	Inosine-5-monophosphate dehydrogenase 2	IMPDH2	6.4502	6.43998	6.5035	3.65587	3.63025	3.70345	10.6778	10.6676	10.7311					39	39	36	61.9	55804	323.31	191030000000	554	514	22
231	6.464	2.95707e+06	Q1	Q9Y617;Q9Y617-2	Q9Y617;Q9Y617-2	Phosphoserine aminotransferase	PSAT1	6.45007	6.48534	6.45561	3.65573	3.67561	3.65556	10.614	10.6493	10.6195					28	28	28	74.9	40422	323.31	180440000000	343	370	19
232	6.461	2.93133e+06	Q1	P63279;H3BQQ9;B0QYN7;H3BPC4	P63279;H3BQQ9;B0QYN7;H3BPC4	SUMO-conjugating enzyme UBC9	UBE2I	6.42631	6.4778	6.47993	3.63198	3.66806	3.67989	10.1244	10.1759	10.178					13	13	13	81	18007	323.31	57818000000	132	158	6.5
233	6.461	2.92342e+06	Q1	P62906	P62906	60S ribosomal protein L10a	RPL10A	6.49432	6.36118	6.52837	3.69999	3.55144	3.72832	10.3795	10.2463	10.4135					21	21	21	61.8	24831	296.01	87947000000	227	217	10
234	6.461	2.92055e+06	Q1	Q71DI3	Q71DI3	Histone H3.2	HIST2H3A	6.27667	6.52334	6.58375	3.48234	3.71361	3.7837	9.76389	10.0106	10.071	+				15	2	2	26.5	15388	66.337	51274000000	224	136	4
235	6.458	2.91038e+06	Q1	Q04837;A0A0G2JLD8;E7EUY5;C9K0U8	Q04837;A0A0G2JLD8;E7EUY5;C9K0U8	Single-stranded DNA-binding protein, mitochondrial	SSBP1	6.48172	6.45462	6.43645	3.68738	3.64489	3.6364	10.27	10.2429	10.2247					12	12	12	64.2	17259	323.31	81302000000	199	148	8
236	6.457	2.90563e+06	Q1	K7EM18;P41567	K7EM18;P41567	Eukaryotic translation initiation factor 1	EIF1	6.39202	6.47334	6.50662	3.59769	3.66361	3.70657	10.0175	10.0989	10.1321					11	11	4	42.1	13607	323.31	45237000000	137	121	5.5
237	6.456	2897639	Q1	P62304;A6NHK2	P62304;A6NHK2	Small nuclear ribonucleoprotein E	SNRPE	6.55923	6.47546	6.33393	3.7649	3.66572	3.53388	9.9215	9.83773	9.6962					4	4	4	65.2	10803	35.816	31610000000	79	92	3
238	6.454	2.88366e+06	Q1	P62424;Q5T8U3;Q5T8U2	P62424;Q5T8U3;Q5T8U2	60S ribosomal protein L7a	RPL7A	6.57751	6.38741	6.39735	3.78318	3.57768	3.5973	10.4169	10.2268	10.2367					21	21	21	57.1	29995	145.43	84806000000	156	266	9
239	6.45	2.87075e+06	Q1	P68036;P68036-3;P68036-2;A0A1B0GUS4	P68036;P68036-3;P68036-2	Ubiquitin-conjugating enzyme E2 L3	UBE2L3	6.43193	6.46382	6.45299	3.6376	3.65409	3.65295	10.1622	10.1941	10.1832					13	13	13	74	17861	183.35	54243000000	163	154	7
240	6.449	2.8667e+06	Q1	P26641;P26641-2	P26641;P26641-2	Elongation factor 1-gamma	EEF1G	6.40802	6.51121	6.4268	3.61368	3.70147	3.62675	10.6997	10.8029	10.7185					44	44	44	81	50118	323.31	215420000000	483	437	25.5
241	6.448	2.84365e+06	Q1	P07237;H7BZ94;H0Y3Z3;I3L398;I3L312;I3L0S0;I3NI03;I3L4M2;I3L3U6;I3L3P5;I3L514;I3L1Y5	P07237;H7BZ94;H0Y3Z3	Protein disulfide-isomerase	P4HB	6.42886	6.4997	6.4154	3.63452	3.68996	3.61535	10.8325	10.9034	10.8191					43	43	43	74.4	57116	323.31	282390000000	634	508	33
242	6.447	2.8342e+06	Q1	A0A087X1Z3;Q9UL46;H0YKU2;H0YLG1;H0YLD2	A0A087X1Z3;Q9UL46	Proteasome activator complex subunit 2	PSME2	6.46388	6.4334	6.44264	3.66955	3.62367	3.64259	10.5104	10.4799	10.4892					23	23	2	7.5	29126	323.31	132210000000	289	254	14.5
243	6.447	2.82512e+06	Q1	P58546;C9JL85	P58546	Myotrophin	MTPN	6.49103	6.5044	6.34449	3.6967	3.69467	3.54444	10.1543	10.1677	10.0078					13	13	13	85.6	12895	323.31	54200000000	231	118	6
244	6.447	2.81697e+06	Q1	Q92688-2;Q92688	Q92688-2;Q92688	Acidic leucine-rich nuclear phosphoprotein 32 family member B	ANP32B	6.42538	6.36224	6.55208	3.63105	3.55251	3.75203	10.24	10.1768	10.3666					10	8	8	35.4	22276	200.09	72705000000	127	195	8.5
245	6.446	2.81569e+06	Q1	Q07020;G3V203;J3QQ67;H0YHA7;Q07020-2;F8VYV2;A0A075B7A0;F8VUA6;F8VXR6	Q07020;G3V203;J3QQ67;H0YHA7;Q07020-2;F8VYV2;A0A075B7A0;F8VUA6	60S ribosomal protein L18	RPL18	6.65829	6.36669	6.31245	3.86395	3.55696	3.5124	10.3564	10.0648	10.0105					13	13	13	55.9	21634	259.86	54932000000	281	188	6.5
246	6.441	2.79787e+06	Q1	P35579;P35579-2;Q5BKV1;B1AH99;A0A0C4DFM8;A1L2Z2;REV__S4R3H4;REV__E7EQT4;REV__Q9UKV3-5;REV__Q9UKV3;P12883;Q9UKX3;Q9Y623;P13533;P11055	P35579;P35579-2	Myosin-9	MYH9	6.40533	6.44731	6.47109	3.611	3.63758	3.67104	11.2399	11.2819	11.3056					205	205	172	66.4	226530	323.31	810100000000	2861	1960	89
247	6.439	2767514	Q1	P55327-2;P55327-4;P55327-3;P55327;P55327-5;P55327-6;E5RFR7;E5RK35	P55327-2;P55327-4;P55327-3;P55327;P55327-5;P55327-6	Tumor protein D52	TPD52	6.41821	6.4344	6.46528	3.62388	3.62467	3.66524	10.3246	10.3407	10.3716					20	20	3	22.3	19863	323.31	78462000000	194	184	10.5
248	6.439	2.75258e+06	Q1	Q12905;B4DY09;A0A0A0MRL0;X6R6Z1	Q12905;B4DY09	Interleukin enhancer-binding factor 2	ILF2	6.42968	6.42725	6.45993	3.63534	3.61752	3.65988	10.5701	10.5677	10.6004					29	29	29	85.4	43062	323.31	145590000000	393	390	18
249	6.439	2.74921e+06	Q1	E9PR30;P62861	E9PR30;P62861	40S ribosomal protein S30	FAU	6.56075	6.50061	6.25438	3.76642	3.69087	3.45434	9.92303	9.86288	9.61665					4	4	3	12.2	10905	10.384	22024000000	53	98	3
250	6.438	2.74106e+06	Q1	Q8NBS9;Q8NBS9-2	Q8NBS9;Q8NBS9-2	Thioredoxin domain-containing protein 5	TXNDC5	6.426	6.44021	6.44728	3.63167	3.63047	3.64723	10.6229	10.6371	10.6442					36	36	36	72.7	47628	323.31	160050000000	334	432	20.5
251	6.437	2.73855e+06	Q1	P61158;B4DXW1;F8WDR7;F8WEW2;F8WE84	P61158;B4DXW1	Actin-related protein 3	ACTR3	6.42845	6.42075	6.46223	3.63411	3.61102	3.66219	10.6036	10.5959	10.6374					38	38	32	74.9	47371	323.31	172340000000	573	418	19.5
252	6.435	2.72844e+06	Q1	P27695;G3V3M6;G3V5Q1;A0A0C4DGK8;G3V3C7;H7C4A8;G3V359;G3V5M0;G3V5D9;G3V3Y6	P27695;G3V3M6;G3V5Q1;A0A0C4DGK8;G3V3C7;H7C4A8	DNA-(apurinic or apyrimidinic site) lyase;DNA-(apurinic or apyrimidinic site) lyase, mitochondrial	APEX1	6.42499	6.40773	6.4724	3.63066	3.598	3.67236	10.2879	10.2706	10.3353					28	28	28	80.2	35554	323.31	79483000000	272	318	9.5
253	6.43	2.71548e+06	Q1	P49458;E9PE20;P49458-2	P49458;E9PE20;P49458-2	Signal recognition particle 9 kDa protein	SRP9	6.40552	6.44353	6.44071	3.61118	3.6338	3.64066	10.0688	10.1068	10.104					8	8	8	73.3	10112	82.42	47381000000	94	86	6
254	6.429	2.7139e+06	Q1	P52597;A0A1B0GW42	P52597	Heterogeneous nuclear ribonucleoprotein F;Heterogeneous nuclear ribonucleoprotein F, N-terminally processed	HNRNPF	6.41516	6.51253	6.35903	3.62082	3.7028	3.55898	10.4764	10.5738	10.4203					30	27	27	69.9	45671	323.31	118240000000	498	415	15
255	6.428	2.70603e+06	Q1	P61970;H3BRV9	P61970;H3BRV9	Nuclear transport factor 2	NUTF2	6.47405	6.47202	6.33731	3.67972	3.66229	3.53726	10.1373	10.1353	10.0006					6	6	6	76.4	14478	162.01	57902000000	102	127	6
256	6.425	2.69315e+06	Q1	Q9UII2;A0A0B4J230;Q9UII2-3;Q9UII2-2	Q9UII2;A0A0B4J230;Q9UII2-3;Q9UII2-2	ATPase inhibitor, mitochondrial	ATPIF1	6.41693	6.36433	6.4947	3.6226	3.5546	3.69465	10.0802	10.0276	10.158					18	18	18	64.2	12249	273.62	52081000000	239	106	6
257	6.425	2.68507e+06	Q1	P30041	P30041	Peroxiredoxin-6	PRDX6	6.47685	6.45508	6.34351	3.68252	3.64535	3.54346	10.5381	10.5163	10.4047					30	30	30	81.7	25035	323.31	120400000000	331	224	15
258	6.425	2.68316e+06	Q1	P26373;J3QSB4;P26373-2;H3BTH3;H3BUK8;J3KS98	P26373;J3QSB4;P26373-2	60S ribosomal protein L13	RPL13	6.54015	6.3295	6.40523	3.74582	3.51977	3.60519	10.2704	10.0597	10.1355					14	14	14	49.3	24261	120.33	56194000000	142	211	7
259	6.423	2.65258e+06	Q1	D3YTB1;F8W727;P62910;D3YTI8	D3YTB1;F8W727;P62910	60S ribosomal protein L32	RPL32	6.43529	6.4516	6.38101	3.64096	3.64186	3.58097	10.1655	10.1818	10.1113					11	11	11	59.4	15616	74.719	51186000000	170	133	7
260	6.419	2.63626e+06	Q1	D6R9P3;D6RD18;D6RBZ0;Q99729-3;Q99729-2	D6R9P3;D6RD18;D6RBZ0;Q99729-3;Q99729-2	Heterogeneous nuclear ribonucleoprotein A/B	HNRNPAB	6.36686	6.45366	6.43762	3.57253	3.64393	3.63758	10.366	10.4527	10.4367					21	21	2	5.4	30302	270.35	109790000000	307	280	13
261	6.412	2.60508e+06	Q1	O14818;O14818-2;H0Y586;O14818-4;F5GY34	O14818;O14818-2;H0Y586;O14818-4	Proteasome subunit alpha type-7	PSMA7	6.41071	6.3628	6.46216	3.61638	3.55307	3.66211	10.3566	10.3087	10.408					18	18	13	50.8	27887	317.35	90926000000	148	248	11.5
262	6.412	2.59291e+06	Q1	P62820;E7END7;P62820-2;P62820-3	P62820;E7END7;P62820-2;P62820-3	Ras-related protein Rab-1A	RAB1A	6.38816	6.37329	6.4731	3.59383	3.56355	3.67306	10.3525	10.3376	10.4374					20	20	11	52.7	22677	323.31	88523000000	220	205	12
263	6.411	2.5929e+06	Q1	P22087;M0QXL5;M0R2Q4;M0R0P1;M0R2U2;M0R1H0;M0R2B0	P22087;M0QXL5;M0R2Q4;M0R0P1	rRNA 2-O-methyltransferase fibrillarin	FBL	6.3617	6.43289	6.43941	3.56737	3.62315	3.63936	10.4372	10.5084	10.5149					25	25	4	15.3	33784	323.31	130320000000	296	321	15.5
264	6.411	2.58661e+06	Q1	E9PC52;Q5JP02;C9J7L0;Q5JNZ6	E9PC52		RBBP7	6.47024	6.44563	6.31645	3.67591	3.6359	3.5164	10.5315	10.5069	10.3777					27	27	1	2.2	46938	323.31	110500000000	269	416	15
265	6.41	2.57303e+06	Q1	P39748;P39748-2;I3L3E9;F5H1Y3	P39748;P39748-2;I3L3E9	Flap endonuclease 1	FEN1	6.41661	6.39826	6.41585	3.62228	3.58853	3.61581	10.5059	10.4875	10.5051					26	26	26	73.7	42592	323.31	132820000000	334	380	16
266	6.41	2.57232e+06	Q1	P52907	P52907	F-actin-capping protein subunit alpha-1	CAPZA1	6.39154	6.3936	6.44412	3.59721	3.58387	3.64408	10.3906	10.3927	10.4432					18	18	15	71.7	32922	323.31	98303000000	244	286	13
267	6.408	2.57069e+06	Q1	P38919;I3L3H2	P38919	Eukaryotic initiation factor 4A-III;Eukaryotic initiation factor 4A-III, N-terminally processed	EIF4A3	6.41385	6.44326	6.36794	3.61952	3.63352	3.5679	10.6607	10.6901	10.6148					44	44	39	79.6	46871	323.31	194110000000	648	411	23
268	6.408	2.56714e+06	Q1	P62913-2;P62913;Q5VVC8;Q5VVC9	P62913-2;P62913;Q5VVC8;Q5VVC9	60S ribosomal protein L11	RPL11	6.43222	6.38322	6.40725	3.63788	3.57349	3.60721	10.2716	10.2226	10.2467					17	17	17	74.6	20124	299.2	76544000000	220	177	9
269	6.404	2.55873e+06	Q1	J3QR09;J3KTE4;P84098;J3QL15	J3QR09;J3KTE4;P84098	Ribosomal protein L19;60S ribosomal protein L19	RPL19	6.46719	6.33882	6.40585	3.67286	3.52909	3.6058	10.1305	10.0021	10.0692					16	16	16	47.2	23134	146.09	48849000000	216	193	6
270	6.404	2.55332e+06	Q1	P49411;H3BNU3	P49411	Elongation factor Tu, mitochondrial	TUFM	6.38708	6.4163	6.40821	3.59274	3.60657	3.60817	10.7493	10.7786	10.7705					40	40	40	79.4	49541	323.31	229360000000	567	452	30
271	6.403	2.53535e+06	Q1	P50502;Q3KNR6;H7C3I1;F6VDH7;Q8IZP2;Q8NFI4;F8WAQ7	P50502;Q3KNR6;H7C3I1;F6VDH7;Q8IZP2	Hsc70-interacting protein;Putative protein FAM10A4	ST13;ST13P4	6.42757	6.40441	6.3772	3.63323	3.59468	3.57715	10.267	10.2438	10.2166					25	25	25	50.4	41331	317.11	68615000000	220	369	9
272	6.403	2.53248e+06	Q1	P62995;P62995-3;H7BXF3;H7C2L4	P62995;P62995-3;H7BXF3	Transformer-2 protein homolog beta	TRA2B	6.37178	6.40858	6.42837	3.57745	3.59885	3.62832	10.2112	10.248	10.2678					28	28	26	60.8	33665	323.31	67634000000	202	288	9
273	6.402	2.53243e+06	Q1	P62917;E9PKZ0;E9PKU4;G3V1A1;E9PP36	P62917;E9PKZ0;E9PKU4;G3V1A1	60S ribosomal protein L8	RPL8	6.51688	6.32206	6.36647	3.72255	3.51232	3.56643	10.3315	10.1366	10.181					26	26	26	64.2	28024	323.31	70897000000	186	257	8.5
274	6.4	2.51843e+06	Q1	F8W1A4;P54819-2;P54819;F8VY04;P54819-6;P54819-5;P54819-3;P54819-4;F8VZG5;G3V213;F8VPP1	F8W1A4;P54819-2;P54819;F8VY04;P54819-6;P54819-5;P54819-3;P54819-4;F8VZG5	Adenylate kinase 2, mitochondrial;Adenylate kinase 2, mitochondrial;Adenylate kinase 2, mitochondrial, N-terminally processed	AK2	6.35517	6.40227	6.44165	3.56083	3.59253	3.64161	10.3864	10.4336	10.4729					28	28	28	79.7	25630	323.31	117000000000	406	232	14
275	6.397	2510536	Q1	B4DJV2;O75390;A0A0C4DGI3;F8VRI6;F8VPA1;H0YH82;H0YIC4;F8VPF9;F8W1S4;F8VRP1;F8VX68;F8W4S1;F8VZK9;F8VX07;F8VTT8;F8VWQ5;F8VR34;F8W642;F8VU34;F8W0J2	B4DJV2;O75390;A0A0C4DGI3	Citrate synthase;Citrate synthase, mitochondrial	CS	6.40721	6.37468	6.40902	3.61287	3.56495	3.60898	10.5476	10.5151	10.5495					28	28	27	63.1	50431	323.31	141850000000	377	453	18
276	6.395	2.49605e+06	Q1	P63167;F8VXL2;F8VRV5;F8VXI7	P63167;F8VXL2;F8VRV5	Dynein light chain 1, cytoplasmic	DYNLL1	6.3957	6.40675	6.38229	3.60137	3.59702	3.58224	9.75797	9.76902	9.74456					6	6	3	33.7	10366	135.43	19337000000	64	89	3
277	6.394	2.4833e+06	Q1	Q7L2H7;Q7L2H7-2;J3KNJ2;H0YCQ8;E9PN86;E7ESM3;E9PRY0;E9PRI2	Q7L2H7;Q7L2H7-2;J3KNJ2	Eukaryotic translation initiation factor 3 subunit M	EIF3M	6.36299	6.4131	6.40464	3.56865	3.60337	3.6046	10.3273	10.3774	10.369					28	28	28	81.3	42502	323.31	89161000000	380	374	12
278	6.39	2.48031e+06	Q1	P23381;P23381-2;G3V3H8;G3V3Y5;G3V277;G3V423;G3V5U1;G3V456;G3V3P2;G3V227;H0YJP3;G3V3X0;G3V2Y7;G3V3S7;G3V4C7;G3V4N8;G3V5W1;G3V2F2;G3V3R3;G3V4S4;G3V313;G3V339;G3V2C0;G3V5H5;P78534;G3V4A3;G3V4Q0;G3V4N0	P23381;P23381-2;G3V3H8;G3V3Y5	Tryptophan--tRNA ligase, cytoplasmic;T1-TrpRS;T2-TrpRS	WARS	6.34292	6.4395	6.3889	3.54859	3.62977	3.58886	10.4184	10.515	10.4644					38	38	38	87	53165	323.31	127730000000	439	471	15.5
279	6.39	2478128	Q1	Q96AZ6;H0YMM4;H3BLY5;Q96AZ6-2	Q96AZ6;H0YMM4	Interferon-stimulated gene 20 kDa protein	ISG20	6.38499	6.36659	6.41845	3.59066	3.55686	3.61841	10.1996	10.1812	10.233					16	16	16	78.5	20363	323.31	60629000000	150	181	8.5
280	6.39	2.46737e+06	Q1	P20674;H3BNX8;H3BRM5;H3BV69;H3BRI0	P20674;H3BNX8;H3BRM5;H3BV69	Cytochrome c oxidase subunit 5A, mitochondrial	COX5A	6.36707	6.42142	6.38103	3.57274	3.61169	3.58099	10.2522	10.3066	10.2662					8	8	8	52.7	16762	150.33	75462000000	118	150	10
281	6.389	2.45779e+06	Q1	P30046;B5MC82;P30046-2;A6NHG4;J3KQ18;H7C342	P30046;B5MC82;P30046-2;A6NHG4;J3KQ18	D-dopachrome decarboxylase;D-dopachrome decarboxylase-like protein	DDT;DDTL	6.40124	6.47025	6.29424	3.60691	3.66051	3.49419	10.1315	10.2005	10.0245					10	10	10	64.4	12712	212.65	52881000000	121	118	7
282	6.386	2.45731e+06	Q1	Q02878;F8VZ45;U3KQR5;F8VR69;F8VZA3;F8VWR1;F8VU16	Q02878	60S ribosomal protein L6	RPL6	6.53186	6.277	6.34952	3.73753	3.46727	3.54948	10.531	10.2761	10.3486					24	24	24	56.6	32728	197.57	101820000000	238	288	13
283	6.385	2.43372e+06	Q1	P31948;P31948-2;P31948-3;F5H783;F5GXD8;H0YGI8	P31948;P31948-2;P31948-3	Stress-induced-phosphoprotein 1	STIP1	6.35102	6.38556	6.41954	3.55669	3.57582	3.61949	10.7802	10.8148	10.8488					49	49	49	73.3	62639	323.31	267620000000	623	543	35
284	6.385	2.43336e+06	Q1	A0A087WYT3;Q15185-4;Q15185;Q15185-3;B4DDC6;Q15185-2	A0A087WYT3;Q15185-4;Q15185;Q15185-3;B4DDC6	Prostaglandin E synthase 3	PTGES3	6.40125	6.42098	6.33138	3.60692	3.61125	3.53133	10.1895	10.2092	10.1196					10	10	10	50	19155	226.44	59200000000	104	164	8
285	6.381	2.41249e+06	Q1	P31939;P31939-2;H7C1S2;C9JLK0;F8WEF0	P31939;P31939-2	Bifunctional purine biosynthesis protein PURH;Phosphoribosylaminoimidazolecarboxamide formyltransferase;IMP cyclohydrolase	ATIC	6.36922	6.36979	6.40276	3.57489	3.56006	3.60271	10.8341	10.8347	10.8677					46	46	46	87.5	64615	323.31	274150000000	743	592	38
286	6.38	2.40682e+06	Q1	A8MXP9;Q68E03	A8MXP9		MATR3	6.34072	6.3879	6.41266	3.54639	3.57817	3.61261	10.8169	10.8641	10.8889					70	70	2	2.9	99966	323.31	298170000000	915	895	39
287	6.38	2.40503e+06	Q1	Q9UKM9;Q5QPM1;Q5QPM0	Q9UKM9;Q5QPM1;Q5QPM0	RNA-binding protein Raly	RALY	6.4043	6.40413	6.33037	3.60996	3.5944	3.53032	10.3308	10.3307	10.2569					24	24	2	9.5	32463	323.31	81866000000	166	306	11
288	6.38	2.40497e+06	Q1	Q09028-3;Q09028;E9PNS6;E9PNS2;E9PIC4	Q09028-3;Q09028	Histone-binding protein RBBP4	RBBP4	6.36006	6.34752	6.431	3.56573	3.53779	3.63095	10.3913	10.3788	10.4623					26	18	2	4.4	46158	323.31	104470000000	277	410	14
289	6.378	2.40418e+06	Q1	P37837;F2Z393;E9PM01;E9PKI8	P37837;F2Z393	Transaldolase	TALDO1	6.30723	6.40321	6.4242	3.51289	3.59348	3.62415	10.3965	10.4925	10.5135					21	21	21	48.7	37540	84.526	118300000000	188	337	16
290	6.378	2.40367e+06	Q1	P14868;P14868-2;H7BZ35;C9J7S3;C9JLC1;H7C278;C9JQM9	P14868;P14868-2	Aspartate--tRNA ligase, cytoplasmic	DARS	6.37495	6.38028	6.37867	3.58062	3.57055	3.57862	10.7916	10.7969	10.7953					49	49	49	81.2	57136	323.31	247170000000	520	501	34
291	6.374	2.38765e+06	Q1	O15144;H7C3F9;C9JTV5;G5E9J0;G5E9S7	O15144	Actin-related protein 2/3 complex subunit 2	ARPC2	6.31607	6.38943	6.41767	3.52174	3.5797	3.61762	10.5023	10.5756	10.6038					30	30	30	80.3	34333	323.31	147950000000	395	300	20
292	6.373	2.37939e+06	Q1	P54709;P54709-2;C9JA36;C9JXZ1;H7C4L9;H7C547;F8WBY4;C9J6S2	P54709;P54709-2;C9JA36;C9JXZ1	Sodium/potassium-transporting ATPase subunit beta-3	ATP1B3	6.32091	6.37462	6.42382	3.52658	3.56488	3.62378	9.94643	10.0001	10.0493					20	20	20	67	31512	139.31	37234000000	151	279	5.5
293	6.373	2.3736e+06	Q1	P00505;P00505-2	P00505;P00505-2	Aspartate aminotransferase, mitochondrial	GOT2	6.31464	6.39265	6.41038	3.52031	3.58292	3.61033	10.589	10.667	10.6847					40	40	40	71.6	47517	323.31	164160000000	368	430	24.5
294	6.371	2.37217e+06	Q1	P55769;B1AHD1	P55769;B1AHD1	NHP2-like protein 1;NHP2-like protein 1, N-terminally processed	NHP2L1	6.29476	6.37376	6.44481	3.50043	3.56402	3.64476	10.083	10.162	10.2331					11	11	11	75.8	14173	197.65	55323000000	111	128	8
295	6.371	2.37044e+06	Q1	P06331;A0A0J9YWU9;P0DP08;P0DP06;A0A0C4DH41;P01825;P01824	P06331;A0A0J9YWU9;P0DP08;P0DP06;A0A0C4DH41;P01825;P01824	Ig heavy chain V-II region ARH-77;Ig heavy chain V-II region NEWM;Ig heavy chain V-II region WAH	IGHV4-61	6.33678	6.45144	6.32468	3.54245	3.64171	3.52464	10.0001	10.1147	9.98798					2	2	2	26	13815	111.31	38319000000	42	123	6
296	6.37	2.36867e+06	Q1	O43390;O43390-3;B4DT28	O43390;O43390-3;B4DT28	Heterogeneous nuclear ribonucleoprotein R	HNRNPR	6.37201	6.38199	6.35696	3.57768	3.57225	3.55692	10.7623	10.7723	10.7473					39	39	2	2.8	70942	323.31	216660000000	501	633	32
297	6.369	2.36781e+06	Q1	Q99873-4;E9PKG1;H7C2I1;Q99873-3;Q99873-2;Q99873;E9PIX6;E9PQ98;A0A087X1W2;H0YDE4;E9PNR9;E9PMW9;E9PMZ2	Q99873-4;E9PKG1;H7C2I1;Q99873-3;Q99873-2;Q99873;E9PIX6;E9PQ98;A0A087X1W2;H0YDE4	Protein arginine N-methyltransferase 1	PRMT1	6.41855	6.34425	6.34516	3.62422	3.53452	3.54512	10.6155	10.5412	10.5421					32	32	27	70.3	40548	323.31	164060000000	378	353	20.5
298	6.367	2.3545e+06	Q1	P04080;A0A1W2PQG6;A0A1W2PS52	P04080;A0A1W2PQG6	Cystatin-B	CSTB	6.33241	6.4327	6.33675	3.53808	3.62297	3.5367	9.91653	10.0168	9.92087					8	8	8	79.6	11139	215.21	36666000000	93	98	5
299	6.367	2.34824e+06	Q1	P45880;A0A0A0MR02;P45880-2;P45880-1;Q5JSD2;Q5JSD1;A2A3S1	P45880;A0A0A0MR02;P45880-2;P45880-1;Q5JSD2;Q5JSD1	Voltage-dependent anion-selective channel protein 2	VDAC2	6.3567	6.36976	6.37514	3.56237	3.56002	3.57509	10.4032	10.4163	10.4216					17	17	17	70.4	31566	323.31	93321000000	259	294	14.5
300	6.367	2.34661e+06	Q1	Q99623;J3KPX7;F5GY37;Q99623-2;F5GWA7;F5H3X6;F5H0C5;F5H2D2;U3KPZ5	Q99623;J3KPX7;F5GY37;Q99623-2;F5GWA7;F5H3X6	Prohibitin-2	PHB2	6.35998	6.37372	6.36732	3.56564	3.56399	3.56728	10.5123	10.526	10.5196					22	22	22	75.6	33296	323.31	125710000000	240	299	18.5
301	6.367	2.34321e+06	Q1	P37108;H0YLA2	P37108;H0YLA2	Signal recognition particle 14 kDa protein	SRP14	6.29235	6.35707	6.45142	3.49801	3.54734	3.65138	10.0226	10.0873	10.1817					9	9	9	43.4	14570	113.68	52716000000	106	136	7
302	6.366	2.32953e+06	Q1	P47914;F8WF43	P47914	60S ribosomal protein L29	RPL29	6.38394	6.2062	6.50638	3.5896	3.39647	3.70634	9.87115	9.69341	9.99359					4	4	3	16.4	17752	16.898	28190000000	52	159	4
303	6.36	2.32832e+06	Q1	O14950	O14950	Myosin regulatory light chain 12B	MYL12B	6.36797	6.38171	6.33099	3.57364	3.57198	3.53094	10.2074	10.2211	10.1704					17	17	1	17.4	19779	323.31	78681000000	341	172	9
304	6.359	2.29481e+06	Q1	P49327;A0A0U1RQF0;A0A0U1RRG3;A0A1B0GTR5;J3KTF0	P49327;A0A0U1RQF0	Fatty acid synthase;[Acyl-carrier-protein] S-acetyltransferase;[Acyl-carrier-protein] S-malonyltransferase;3-oxoacyl-[acyl-carrier-protein] synthase;3-oxoacyl-[acyl-carrier-protein] reductase;3-hydroxyacyl-[acyl-carrier-protein] dehydratase;Enoyl-[acyl-carrier-protein] reductase;Oleoyl-[acyl-carrier-protein] hydrolase	FASN	6.32494	6.36107	6.39194	3.53061	3.55134	3.59189	11.307	11.3431	11.374					168	168	168	72.9	273420	323.31	857840000000	2234	2511	125
305	6.358	2.29181e+06	Q1	P49720;A0A087WXQ8;A0A087WY10;A0A087WUL2	P49720;A0A087WXQ8;A0A087WY10;A0A087WUL2	Proteasome subunit beta type-3	PSMB3	6.40951	6.34724	6.31832	3.61518	3.53751	3.51828	10.1977	10.1355	10.1066					12	12	12	59.5	22949	251.05	58587000000	224	205	8
306	6.357	2.2911e+06	Q1	Q5TEC6	Q5TEC6	Histone H3	HIST2H3PS2	6.5028	6.20078	6.36791	3.70846	3.39105	3.56786	10.2331	9.93103	10.0982	+				9	3	3	24.3	15430	45.988	55347000000	28	136	7
307	6.356	2.2899e+06	Q1	O95433;O95433-2;G3V438;H0YJG7;H0YJU2;G3V3W9;H0YJ63	O95433;O95433-2;G3V438;H0YJG7	Activator of 90 kDa heat shock protein ATPase homolog 1	AHSA1	6.37928	6.34879	6.34035	3.58495	3.53905	3.54031	10.3948	10.3643	10.3558					26	26	26	79.9	38274	323.31	109750000000	280	338	13.5
308	6.355	2.28327e+06	Q1	M0R0F0;P46782;M0R0R2;M0QZN2	M0R0F0;P46782;M0R0R2;M0QZN2	40S ribosomal protein S5;40S ribosomal protein S5, N-terminally processed	RPS5	6.4208	6.35689	6.28783	3.62647	3.54716	3.48779	10.3059	10.242	10.173					16	16	16	62.5	22391	146.03	64918000000	228	200	10
309	6.355	2.27229e+06	Q1	P25789;H0YN18;H0YL69;H0YMZ1;H0YMA1;P25789-2;H0YMI6;H0YLC2;H0YLS6	P25789;H0YN18;H0YL69;H0YMZ1;H0YMA1;P25789-2;H0YMI6;H0YLC2	Proteasome subunit alpha type-4;Proteasome subunit alpha type	PSMA4	6.30393	6.31664	6.44452	3.5096	3.50691	3.64448	10.2305	10.2432	10.3711					17	17	8	24.5	29483	323.31	74620000000	201	261	11
310	6.35	2.2436e+06	Q1	O75964;E9PN17	O75964;E9PN17	ATP synthase subunit g, mitochondrial	ATP5L	6.37213	6.35778	6.32024	3.5778	3.54805	3.52019	9.95625	9.9419	9.90436					8	8	8	65	11428	117.3	33797000000	68	103	5
311	6.349	2.24179e+06	Q1	Q96A72;F5H6N1;F5H124	Q96A72;F5H6N1	Protein mago nashi homolog 2	MAGOHB	6.30272	6.33345	6.40959	3.50839	3.52372	3.60955	10.091	10.1217	10.1978					20	20	1	6.1	17276	323.31	51462000000	207	148	8
312	6.348	2.23644e+06	Q1	P55060;P55060-3;P55060-4;P55060-2	P55060;P55060-3;P55060-4	Exportin-2	CSE1L	6.33672	6.31223	6.39546	3.54239	3.5025	3.59541	10.9294	10.9049	10.9882					70	70	70	69.3	110420	323.31	352370000000	721	971	51
313	6.348	2.23068e+06	Q1	P15153;B1AH77;B1AH80;B1AH78;B1AH79;G3V4H1;G3V476;Q9H4E5-2;Q9H4E5	P15153;B1AH77;B1AH80;B1AH78	Ras-related C3 botulinum toxin substrate 2	RAC2	6.36226	6.30829	6.37208	3.56793	3.49856	3.57204	10.0925	10.0385	10.1023					10	9	5	21.4	21429	50.188	51676000000	144	192	7
314	6.347	2.22605e+06	Q1	P48047;H7C068	P48047	ATP synthase subunit O, mitochondrial	ATP5O	6.334	6.33312	6.3742	3.53966	3.52339	3.57416	10.2983	10.2974	10.3385					16	16	7	34.7	23277	323.31	86683000000	181	213	12
315	6.344	2.2127e+06	Q1	C9JFR7;P99999	C9JFR7;P99999	Cytochrome c	CYCS	6.32111	6.37265	6.33943	3.52678	3.56291	3.53938	9.98442	10.0359	10.0027					14	14	11	53.5	11333	113.3	41723000000	164	101	6
316	6.341	2.19775e+06	Q1	A0A024RA52;P25787;C9JCK5;H3BT36;H7C402	A0A024RA52;P25787;C9JCK5	Proteasome subunit alpha type;Proteasome subunit alpha type-2	PSMA2	6.33693	6.31145	6.37518	3.54259	3.50172	3.57513	10.336	10.3105	10.3743					16	16	16	65.8	25898	306.92	81252000000	224	234	13
317	6.34	2.18931e+06	Q1	P62140;E7ETD8;C9JP48;C9J9S3	P62140;E7ETD8	Serine/threonine-protein phosphatase PP1-beta catalytic subunit;Serine/threonine-protein phosphatase	PPP1CB	6.32687	6.36431	6.32871	3.53253	3.55458	3.52866	10.3581	10.3956	10.36					25	25	12	43.1	37186	323.31	97211000000	268	327	14
318	6.338	2.1818e+06	Q1	P15374;A0A087WTB8;Q5TBK7	P15374;A0A087WTB8;Q5TBK7	Ubiquitin carboxyl-terminal hydrolase isozyme L3;Ubiquitin carboxyl-terminal hydrolase	UCHL3	6.34553	6.35557	6.31428	3.5512	3.54583	3.51424	10.3099	10.3199	10.2786					23	23	23	87	26182	323.31	88123000000	319	230	12
319	6.334	2.17402e+06	Q1	P56385	P56385	ATP synthase subunit e, mitochondrial	ATP5I	6.3242	6.3193	6.35864	3.52987	3.50956	3.55859	9.68648	9.68157	9.72091					5	5	5	62.3	7933.1	15.493	18831000000	55	69	3
320	6.331	2.15974e+06	Q1	P38159;P38159-2;H3BUY5;H3BT71;H0Y6E7;H3BR27;P38159-3;O75526;H3BNC1;Q8N7X1	P38159;P38159-2;H3BUY5;H3BT71;H0Y6E7	RNA-binding motif protein, X chromosome;RNA-binding motif protein, X chromosome, N-terminally processed	RBMX	6.28767	6.34539	6.36069	3.49334	3.53566	3.56064	10.4516	10.5093	10.5246					65	65	25	41.7	42331	323.31	122570000000	572	391	19
321	6.328	2.14966e+06	Q1	Q12906-7;Q12906-4;Q12906-6	Q12906-7;Q12906-4;Q12906-6	Interleukin enhancer-binding factor 3	ILF3	6.32129	6.31441	6.34949	3.52696	3.50467	3.54944	10.7628	10.7559	10.7909					60	60	3	5	95807	323.31	246570000000	695	898	36
322	6.323	2.13139e+06	Q1	P62306;A0A0B4J254;F8W0W6	P62306;A0A0B4J254;F8W0W6	Small nuclear ribonucleoprotein F	SNRPF	6.32392	6.18309	6.46082	3.52958	3.37336	3.66077	9.81113	9.6703	9.94803					9	9	9	98.8	9725.1	106.96	30402000000	114	86	4
323	6.321	2.11509e+06	Q1	O60664-4;O60664;K7ERZ3;O60664-2;K7EL96;K7ER39;K7EJD0	O60664-4;O60664;K7ERZ3;O60664-2	Perilipin-3	PLIN3	6.28222	6.32094	6.36112	3.48789	3.5112	3.56107	10.4998	10.5385	10.5787					28	28	2	4.3	45803	323.31	141110000000	385	422	21.5
324	6.321	2.10194e+06	Q1	P55072;C9JUP7;C9IZA5	P55072	Transitional endoplasmic reticulum ATPase	VCP	6.32543	6.34639	6.29133	3.5311	3.53666	3.49128	10.8638	10.8848	10.8297					90	90	90	85.5	89321	323.31	304120000000	1081	806	45
325	6.319	2.0972e+06	Q1	O60234;M0QYJ8;M0R0C1;M0QYG8;M0R1D2;M0QXC2;M0QX47;M0QXZ6;M0R2P2	O60234;M0QYJ8;M0R0C1;M0QYG8;M0R1D2;M0QXC2	Glia maturation factor gamma	GMFG	6.31827	6.33719	6.30269	3.52394	3.52746	3.50265	10.0485	10.0674	10.0329					14	11	11	84.5	16801	323.31	53667000000	172	142	7
326	6.318	2.08791e+06	Q1	P09874;Q5VX84;Q5VX85	P09874	Poly [ADP-ribose] polymerase 1	PARP1	6.42092	6.29791	6.23648	3.62658	3.48817	3.43643	11.0136	10.8906	10.8292					82	82	82	68.8	113080	323.31	340050000000	1010	1014	51
327	6.317	2.08745e+06	Q1	P07741;P07741-2;H3BQB1;H3BQF1;H3BQZ9;H3BSW3	P07741;P07741-2;H3BQB1;H3BQF1;H3BQZ9	Adenine phosphoribosyltransferase	APRT	6.28426	6.31428	6.3532	3.48993	3.50454	3.55315	10.1694	10.1994	10.2384					20	20	20	93.9	19608	323.31	64033000000	193	180	10
328	6.316	2.08048e+06	Q1	P61289;P61289-2;K9J957;P61289-3;A0A087WTV2;K7ENH2;K7ESG5;B3KQ25;B7Z8D3;K7EPX6;K7EKR3;K7EMD0	P61289;P61289-2;K9J957;P61289-3;A0A087WTV2;K7ENH2;K7ESG5;B3KQ25	Proteasome activator complex subunit 3	PSME3	6.35513	6.29031	6.3035	3.5608	3.48058	3.50345	10.3195	10.2546	10.2678					23	23	23	74.4	29506	323.31	82698000000	289	254	12
329	6.316	2.07599e+06	Q1	P16401	P16401	Histone H1.5	HIST1H1B	6.24101	6.31837	6.38746	3.44668	3.50864	3.58741	10.1262	10.2035	10.2726	+				12	12	11	25.7	22580	196.92	65775000000	69	226	10
330	6.315	2.07597e+06	Q1	P25788-2;P25788;G3V4X5;H0YJ03;G3V3W4;G3V5N4	P25788-2;P25788;G3V4X5	Proteasome subunit alpha type-3	PSMA3	6.29323	6.31003	6.3429	3.4989	3.50029	3.54285	10.2923	10.3091	10.342					16	16	16	68.5	27647	134.4	80056000000	148	248	13
331	6.314	2.07308e+06	Q1	P05198;G3V4T5;H0YJS4	P05198;G3V4T5;H0YJS4	Eukaryotic translation initiation factor 2 subunit 1	EIF2S1	6.28968	6.30736	6.34503	3.49535	3.49763	3.54498	10.4759	10.4935	10.5312					39	39	39	89.2	36112	323.31	121300000000	407	315	20
332	6.314	2.06955e+06	Q1	P61769;H0YLF3;F5H6I0	P61769;H0YLF3;F5H6I0	Beta-2-microglobulin;Beta-2-microglobulin form pI 5.3	B2M	6.26512	6.3782	6.29864	3.47079	3.56847	3.4986	9.84924	9.96232	9.88276					6	6	6	58	13714	178.09	29565000000	74	119	5
333	6.311	2.06368e+06	Q1	P45973;F8VNY3	P45973;F8VNY3	Chromobox protein homolog 5	CBX5	6.28674	6.29608	6.3511	3.49241	3.48635	3.55105	10.017	10.0263	10.0814					12	11	11	56.5	22225	113.16	46974000000	116	191	7
334	6.309	2.05234e+06	Q1	Q13283;E5RIZ6;E5RH42;E5RJU8;Q13283-2;E5RIF8;E5RI46;E5RH00	Q13283	Ras GTPase-activating protein-binding protein 1	G3BP1	6.31615	6.29542	6.31575	3.52182	3.48569	3.5157	10.5437	10.523	10.5433					37	37	32	59.2	52164	323.31	138300000000	527	466	22
335	6.307	2.03804e+06	Q1	Q14974;Q14974-2;J3KTM9;J3QR48;J3QKQ5;J3QRG4	Q14974;Q14974-2;J3KTM9	Importin subunit beta-1	KPNB1	6.32449	6.30842	6.28939	3.53015	3.49869	3.48935	10.7281	10.7121	10.6931					59	59	59	66.8	97169	323.31	223570000000	810	876	33
336	6.307	2.03497e+06	Q1	Q71U36;Q71U36-2;Q13748;Q13748-2;F8VQQ4;Q6PEY2	Q71U36;Q71U36-2;Q13748;Q13748-2	Tubulin alpha-1A chain;Tubulin alpha-3C/D chain	TUBA1A;TUBA3C	6.34648	6.39865	6.17702	3.55214	3.58891	3.37697	10.5539	10.606	10.3844					38	4	1	3.1	50135	318.11	151450000000	352	451	21
337	6.307	2.03081e+06	Q1	O15145;C9JZD1;F8VR50	O15145	Actin-related protein 2/3 complex subunit 3	ARPC3	6.32861	6.33699	6.25555	3.53427	3.52726	3.4555	10.2138	10.2221	10.1407					15	15	15	76.4	20546	290.9	73725000000	279	178	10
338	6.305	2.02394e+06	Q1	O75947;O75947-2;F5H608	O75947;O75947-2	ATP synthase subunit d, mitochondrial	ATP5H	6.31463	6.33242	6.2691	3.5203	3.52269	3.46906	10.154	10.1718	10.1085					17	17	17	75.2	18491	189.46	57075000000	185	161	9
339	6.305	2.02046e+06	Q1	P02786;G3V0E5;H7C3V5;F8WBE5	P02786;G3V0E5	Transferrin receptor protein 1;Transferrin receptor protein 1, serum form	TFRC	6.32057	6.28665	6.30845	3.52624	3.47692	3.5084	10.7798	10.7458	10.7676					50	50	49	64.1	84870	323.31	233480000000	502	760	37.5
340	6.305	2.01971e+06	Q1	Q08211;Q08211-2;REV__H0YA90;REV__Q7Z6J0-3	Q08211	ATP-dependent RNA helicase A	DHX9	6.2955	6.32546	6.29361	3.50117	3.51572	3.49357	10.966	10.9959	10.9641					86	86	86	65	140960	323.31	386240000000	1180	1270	61
341	6.305	2.01885e+06	Q1	P41091;Q2VIR3;H7BZU1	P41091;Q2VIR3	Eukaryotic translation initiation factor 2 subunit 3;Putative eukaryotic translation initiation factor 2 subunit 3-like protein	EIF2S3;EIF2S3L	6.28866	6.29235	6.33342	3.49433	3.48261	3.53338	10.496	10.4997	10.5408					34	34	9	19.3	51109	323.31	128680000000	332	472	21
342	6.303	2.0161e+06	Q1	P61513;C9J4Z3;Q6P4E4;E9PEL3;G5E9R3;M0R0A1;M0R2L6;A6NKH3	P61513;C9J4Z3;Q6P4E4;E9PEL3;G5E9R3;M0R0A1;M0R2L6	60S ribosomal protein L37a	RPL37A	6.31482	6.34438	6.24892	3.52048	3.53464	3.44888	9.80203	9.83159	9.73613					6	6	6	58.7	10275	70.69	23048000000	118	92	4
343	6.301	2.00583e+06	Q1	O00303;H0YDT6;E9PQV8;A0A1W2PP79	O00303	Eukaryotic translation initiation factor 3 subunit F	EIF3F	6.27807	6.34358	6.28209	3.48374	3.53384	3.48204	10.3393	10.4048	10.3433					22	22	22	71.7	37563	323.31	110620000000	281	357	15
344	6.297	1.99934e+06	Q1	P18859;P18859-2;A8MUH2	P18859;P18859-2	ATP synthase-coupling factor 6, mitochondrial	ATP5J	6.34748	6.32628	6.21815	3.55315	3.51654	3.4181	9.97299	9.95179	9.84366					11	11	11	55.6	12587	241.98	35006000000	95	108	5.5
345	6.296	1.9993e+06	Q1	K7EQ55;K7EK33;Q96EP5;Q96EP5-2;K7EQ02	K7EQ55;K7EK33;Q96EP5;Q96EP5-2;K7EQ02	DAZ-associated protein 1	DAZAP1	6.23421	6.31422	6.33889	3.43987	3.50449	3.53884	10.1194	10.1994	10.224					15	15	15	42.9	43312	266.93	65482000000	202	406	10
346	6.295	1.98852e+06	Q1	O43707;O43707-2;F5GXS2;O43707-3;H7C144;P12814-2;P12814;P12814-3;P12814-4;H9KV75;P35609-2;P35609;G3V2N5;G3V2W4;F6THM6;H7C5W8;G3V2X9;H0YJW3;K7EP19;G3V5M4;H0YJ11;G3V2E8	O43707;O43707-2	Alpha-actinin-4	ACTN4	6.25808	6.30325	6.32235	3.46375	3.49351	3.5223	10.8245	10.8696	10.8887					76	76	48	59.6	104850	323.31	293060000000	848	911	48
347	6.295	1.98621e+06	Q1	Q7L513;Q7L513-2;Q7L513-9;Q7L513-10;Q7L513-5;Q7L513-4;Q7L513-14;Q7L513-11;Q7L513-8;Q5VXA5;Q7L513-6;Q7L513-13;Q7L513-7;Q7L513-15	Q7L513;Q7L513-2;Q7L513-9;Q7L513-10;Q7L513-5;Q7L513-4;Q7L513-14;Q7L513-11;Q7L513-8	Fc receptor-like A	FCRLA	6.20369	6.2937	6.38613	3.40936	3.48397	3.58608	9.93394	10.0239	10.1164					14	14	6	24.5	38927	247.55	40976000000	197	359	7
348	6.294	1.97417e+06	Q1	D6RAH7;H9KV45;A0A087WY85;P61077;P61077-3;P61077-2;D6RFM0;A0A0A0MQU3;P62837-2;P62837;D6RAW0	D6RAH7;H9KV45;A0A087WY85;P61077;P61077-3;P61077-2;D6RFM0;A0A0A0MQU3;P62837-2;P62837	Ubiquitin-conjugating enzyme E2 D3;Ubiquitin-conjugating enzyme E2 D2	UBE2D3;UBE2D2	6.29571	6.373	6.21205	3.50137	3.56326	3.412	9.78292	9.86021	9.69926					5	5	4	43.2	13637	126.8	25292000000	55	118	4
349	6.293	1.96528e+06	Q1	O60506;O60506-2;F6UXX1	O60506;O60506-2	Heterogeneous nuclear ribonucleoprotein Q	SYNCRIP	6.30672	6.30962	6.26234	3.51238	3.49989	3.46229	10.6902	10.6931	10.6458					36	28	2	7.2	69602	323.31	183210000000	524	623	31.5
350	6.29	1.95598e+06	Q1	Q99733;Q99733-2;C9J6D1;E9PS34;E9PNJ7;A8MXH2;E9PNW0;E9PJJ2;E9PP22;E9PKI2;H0YCI4	Q99733;Q99733-2;C9J6D1;E9PS34;E9PNJ7;A8MXH2;E9PNW0;E9PJJ2	Nucleosome assembly protein 1-like 4	NAP1L4	6.28852	6.26588	6.31594	3.49419	3.45615	3.5159	10.1279	10.1053	10.1553					16	14	4	17.9	42823	323.31	57527000000	202	375	9
351	6.289	1.95253e+06	Q1	O43776;K7EIU7;O43776-2;K7EPK2;K7EJ19;K7EQ35;K7EMQ6	O43776	Asparagine--tRNA ligase, cytoplasmic	NARS	6.29594	6.28175	6.28966	3.50161	3.47202	3.48962	10.5235	10.5093	10.5172					42	42	42	58.4	62942	323.31	135770000000	451	548	22
352	6.289	1.94842e+06	Q1	P36542	P36542	ATP synthase subunit gamma, mitochondrial	ATP5C1	6.33761	6.30369	6.22528	3.54327	3.49396	3.42524	10.3367	10.3028	10.2244					18	18	1	4.4	32996	198.5	78732000000	205	298	13
353	6.288	1.94606e+06	Q1	P09661;H0YKK0;H0YMA0;H0YLR3	P09661;H0YKK0	U2 small nuclear ribonucleoprotein A	SNRPA1	6.23342	6.32254	6.30794	3.43909	3.51281	3.50789	9.99363	10.0828	10.0681					30	30	30	77.6	28415	323.31	41406000000	201	255	7.5
354	6.287	1.94564e+06	Q1	P13667;C9JMN9	P13667	Protein disulfide-isomerase A4	PDIA4	6.26982	6.3277	6.26339	3.47548	3.51797	3.46334	10.7348	10.7926	10.7283					62	62	61	70.9	72932	323.31	238550000000	685	645	38
355	6.287	1.94065e+06	Q1	P20618	P20618	Proteasome subunit beta type-1	PSMB1	6.22599	6.30992	6.32488	3.43166	3.50019	3.52484	10.2573	10.3412	10.3562					19	19	19	82.6	26489	323.31	81142000000	249	241	14
356	6.284	1.935e+06	Q1	Q01581;D6RIW1;P54868-3;P54868-2;P54868	Q01581	Hydroxymethylglutaryl-CoA synthase, cytoplasmic	HMGCS1	6.24834	6.25888	6.34605	3.45401	3.44915	3.54601	10.5649	10.5754	10.6626					37	37	37	80.4	57293	323.31	159170000000	470	520	27
357	6.283	1.92932e+06	Q1	P06493;A0A024QZP7;A0A087WZZ9;E5RIU6;P06493-2	P06493;A0A024QZP7;A0A087WZZ9;E5RIU6;P06493-2	Cyclin-dependent kinase 1	CDK1;CDC2	6.28053	6.26279	6.30682	3.4862	3.45306	3.50678	10.3418	10.324	10.3681					31	30	29	81.8	34095	323.31	80873000000	277	297	15
358	6.283	1.92203e+06	Q1	P26368-2;P26368;K7ENG2	P26368-2;P26368;K7ENG2	Splicing factor U2AF 65 kDa subunit	U2AF2	6.24627	6.31233	6.28967	3.45194	3.5026	3.48962	10.3075	10.3736	10.3509					30	30	28	55.6	53120	323.31	98891000000	422	471	15
359	6.283	1.92139e+06	Q1	P35637-2;P35637	P35637-2;P35637	RNA-binding protein FUS	FUS	6.21495	6.30139	6.3316	3.42062	3.49166	3.53156	10.2141	10.3005	10.3307					17	14	2	7	53354	323.31	73829000000	186	525	13
360	6.281	1.91559e+06	Q1	P31153;P31153-2;Q00266	P31153;P31153-2	S-adenosylmethionine synthase isoform type-2	MAT2A	6.28573	6.30813	6.25044	3.4914	3.4984	3.45039	10.375	10.3974	10.3397					27	27	27	61.3	43660	323.31	89909000000	282	395	16
361	6.281	1.91461e+06	Q1	P22314;P22314-2;Q5JRR6;Q5JRR9;Q5JRS0;Q5JRS2;Q5JRS1;Q5JRS3	P22314;P22314-2	Ubiquitin-like modifier-activating enzyme 1	UBA1	6.25008	6.28109	6.31049	3.45575	3.47135	3.51044	10.8554	10.8864	10.9158					69	69	69	89.8	117850	323.31	291000000000	893	1058	52.5
362	6.28	1.91096e+06	Q1	Q15907;Q15907-2;M0R2D0	Q15907;Q15907-2	Ras-related protein Rab-11B	RAB11B	6.28058	6.28075	6.27935	3.48625	3.47102	3.47931	10.3119	10.312	10.3106					17	17	2	13.3	24488	272.73	81871000000	155	218	14
363	6.279	1.90646e+06	Q1	Q9Y5S9;A0A0J9YW13	Q9Y5S9;A0A0J9YW13	RNA-binding protein 8A	RBM8A	6.35092	6.26689	6.21866	3.55659	3.45716	3.41862	10.049	9.96496	9.91673					10	10	2	7.5	19889	323.31	39317000000	120	174	6.5
364	6.276	1.8915e+06	Q1	P62879;E7EP32;C9JXA5;C9JIS1;P62879-2;C9JZN1	P62879;E7EP32;C9JXA5;C9JIS1;P62879-2;C9JZN1	Guanine nucleotide-binding protein G(I)/G(S)/G(T) subunit beta-2	GNB2	6.25539	6.30347	6.27015	3.46106	3.49373	3.47011	10.1183	10.1663	10.133					23	23	10	50.6	37331	323.31	53663000000	184	340	9.5
365	6.274	1.88198e+06	Q1	E5RHG8;Q15369;Q15369-2;R4GMY8	E5RHG8;Q15369;Q15369-2;R4GMY8	Transcription elongation factor B polypeptide 1	TCEB1	6.26701	6.30617	6.24866	3.47268	3.49644	3.44861	9.96508	10.0042	9.94672					9	9	9	83.1	9960.1	265.6	34757000000	99	89	6.5
366	6.272	1.87021e+06	Q1	P49321;P49321-3;P49321-2;Q5T624;E9PI86;H0YF33;H0YDS9;E9PAU3;E9PJQ2	P49321;P49321-3;P49321-2;Q5T624	Nuclear autoantigenic sperm protein	NASP	6.27782	6.25703	6.28045	3.48349	3.44729	3.4804	10.6748	10.6541	10.6775					41	41	6	5.6	85237	323.31	184330000000	715	788	32.5
367	6.271	1.86868e+06	Q1	P14324;P14324-2;A0A087WVN4;A0A087X090;A0A087X1D8;A0A087WTP2	P14324;P14324-2;A0A087WVN4;A0A087X090	Farnesyl pyrophosphate synthase	FDPS	6.27692	6.25	6.28685	3.48259	3.44027	3.4868	10.3082	10.2813	10.3181					23	23	23	57.3	48275	323.31	87993000000	275	419	14
368	6.267	1.8542e+06	Q1	P13073;H3BN72;H3BNV9;H3BPG0;Q86WV2;H3BNI5	P13073;H3BN72;H3BNV9;H3BPG0;Q86WV2	Cytochrome c oxidase subunit 4 isoform 1, mitochondrial	COX4I1	6.25731	6.30165	6.24336	3.46298	3.49192	3.44331	10.0967	10.141	10.0828					14	14	14	53.8	19576	163.5	48836000000	141	169	9
369	6.263	1.83946e+06	Q1	Q15084-3;Q15084;Q15084-4;Q15084-5;Q15084-2	Q15084-3;Q15084;Q15084-4;Q15084-5;Q15084-2	Protein disulfide-isomerase A6	PDIA6	6.24484	6.31551	6.22873	3.45051	3.50577	3.42869	10.3604	10.4311	10.3443					26	26	26	66.1	47837	323.31	97234000000	305	437	17
370	6.262	1.83864e+06	Q1	Q16543;K7EQA9;K7EIU0	Q16543;K7EQA9	Hsp90 co-chaperone Cdc37;Hsp90 co-chaperone Cdc37, N-terminally processed	CDC37	6.21194	6.25325	6.32123	3.41761	3.44352	3.52118	10.1578	10.1991	10.2671					31	31	5	11.4	44468	323.31	62517000000	265	378	11.5
371	6.26	1.82362e+06	Q1	P78417;Q5TA02;P78417-3;P78417-2;Q5TA01	P78417;Q5TA02;P78417-3;P78417-2;Q5TA01	Glutathione S-transferase omega-1	GSTO1	6.2462	6.24306	6.29181	3.45187	3.43333	3.49176	10.2105	10.2074	10.2561					25	25	25	67.6	27566	323.31	63723000000	224	241	12
372	6.258	1.82006e+06	Q1	D6RFG8;P27707;D6RCP9;D6RG38	D6RFG8;P27707;D6RCP9	Deoxycytidine kinase	DCK	6.25945	6.29581	6.21826	3.46511	3.48608	3.41821	10.2585	10.2949	10.2173					23	23	23	51.7	36764	323.31	69655000000	247	317	13
373	6.257	1.81548e+06	Q1	P09012;M0R268;M0R221;M0R2B8;M0QZG7;M0QXK2;M0R0G9	P09012;M0R268;M0R221;M0R2B8;M0QZG7;M0QXK2	U1 small nuclear ribonucleoprotein A	SNRPA	6.22916	6.28273	6.25911	3.43483	3.47299	3.45907	10.0686	10.1221	10.0985					16	16	13	47.2	31279	323.31	49519000000	201	282	9
374	6.257	1.81449e+06	Q1	Q13151	Q13151	Heterogeneous nuclear ribonucleoprotein A0	HNRNPA0	6.18209	6.31064	6.27751	3.38776	3.50091	3.47746	10.1812	10.3097	10.2766					19	19	19	58.7	30840	323.31	78621000000	218	305	13
375	6.254	1.80947e+06	Q1	P84101-4;P84101;F8WBN3;B9A031;C9JQZ0;B8ZZY7;F8WBV6;P84101-3;P84101-2	P84101-4;P84101;F8WBN3;B9A031;C9JQZ0;B8ZZY7;F8WBV6;P84101-3;P84101-2	Small EDRK-rich factor 2	SERF2	6.22727	6.19376	6.34115	3.43294	3.38403	3.54111	9.41345	9.37994	9.52733					6	6	6	48.9	5215.9	24.669	10721000000	113	45	2
376	6.252	1.79988e+06	Q1	E7EMN6;P41236;E7EUI7;G1AUC5;Q6NXS1	E7EMN6;P41236;E7EUI7	Protein phosphatase inhibitor 2	PPP1R2	6.25542	6.31221	6.18946	3.46108	3.50248	3.38941	9.98566	10.0425	9.91971					17	17	17	68.2	19245	323.31	37809000000	172	170	7
377	6.252	1.79416e+06	Q1	A0A087WVQ6;Q00610-2;Q00610;J3KS13;K7EJJ5;J3KRF5;J3KSQ2;J3QL20;F5H5N6;A0A087WV74;A0A087WXH4	A0A087WVQ6;Q00610-2;Q00610	Clathrin heavy chain;Clathrin heavy chain 1	CLTC	6.23964	6.25682	6.26025	3.44531	3.44709	3.46021	11.079	11.0962	11.0997					125	125	106	64.4	192060	323.31	496240000000	1490	1679	90
378	6.251	1.78786e+06	Q1	Q9H3K6;A0A087WZT3;Q9H3K6-2;H3BV85;H3BTW0;A0A0B4J295	Q9H3K6;A0A087WZT3;Q9H3K6-2	BolA-like protein 2	BOLA2	6.24927	6.19251	6.31163	3.45494	3.38278	3.51158	9.83339	9.77663	9.89575					9	9	5	47.7	10116	277.38	27824000000	81	86	5
379	6.245	1.77045e+06	Q1	Q9UMS4;F5GY56;F5H2I0;H0YGZ5;H0YGF3	Q9UMS4	Pre-mRNA-processing factor 19	PRPF19	6.21819	6.25067	6.26515	3.42385	3.44094	3.46511	10.3821	10.4146	10.4291					26	26	26	83.3	55180	323.31	103540000000	242	504	19
380	6.244	1.76203e+06	Q1	P30153;B3KQV6;E9PH38;M0QXG4;M0R0K6	P30153;B3KQV6	Serine/threonine-protein phosphatase 2A 65 kDa regulatory subunit A alpha isoform	PPP2R1A	6.24319	6.295	6.19398	3.44886	3.48526	3.39393	10.5832	10.635	10.534					42	42	15	31.6	65308	323.31	160520000000	543	589	28.5
381	6.242	1.7593e+06	Q1	Q86V81	Q86V81	THO complex subunit 4	ALYREF	6.26381	6.29201	6.17123	3.46948	3.48228	3.37118	10.2629	10.2911	10.1703					12	12	1	5.1	26888	323.31	72640000000	195	257	13
382	6.24	1.75837e+06	Q1	Q5T4U5;P11310;P11310-2;B7Z9I1;E9PJM9;E9PRX4;H0YDT5	Q5T4U5;P11310;P11310-2;B7Z9I1	Medium-chain specific acyl-CoA dehydrogenase, mitochondrial	ACADM	6.21539	6.26014	6.24448	3.42106	3.45041	3.44443	10.4016	10.4463	10.4307					27	27	27	58.8	50270	323.31	105200000000	338	454	20
383	6.238	1.73939e+06	Q1	P60900;G3V5Z7;G3V295;P60900-2;G3V3I1;P60900-3;G3V3U4;G3V4S5;G3V2S7;H0YJC4	P60900;G3V5Z7;G3V295;P60900-2;G3V3I1;P60900-3	Proteasome subunit alpha type-6;Proteasome subunit alpha type	PSMA6	6.19173	6.26581	6.25601	3.3974	3.45607	3.45596	10.2383	10.3123	10.3025					16	16	16	72.4	27399	323.31	79237000000	245	246	14.5
384	6.237	1.73408e+06	Q1	A6NF51;F8VVW8	A6NF51;F8VVW8		BPNT1	6.22092	6.25815	6.2329	3.42659	3.44842	3.43286	10.2522	10.2894	10.2642					22	22	2	9.3	31707	278.61	76570000000	252	291	14
385	6.236	1.72824e+06	Q1	A0A0G2JMH6;P01903;Q30118;A0A0G2JH46;A0A140TA34;P01906	A0A0G2JMH6;P01903;Q30118;A0A0G2JH46	HLA class II histocompatibility antigen, DR alpha chain	HLA-DRA	6.22745	6.27484	6.20529	3.43312	3.46511	3.40525	10.042	10.0894	10.0199					15	15	14	49.6	28621	164.03	40076000000	117	254	8.5
386	6.234	1725205	Q1	Q9BWD1;Q9BWD1-2	Q9BWD1;Q9BWD1-2	Acetyl-CoA acetyltransferase, cytosolic	ACAT2	6.23698	6.25166	6.21365	3.44264	3.44193	3.4136	10.3774	10.3921	10.3541					25	25	25	87.4	41350	323.31	102410000000	400	397	18
387	6.234	1.72024e+06	Q1	P50914;E7EPB3	P50914;E7EPB3	60S ribosomal protein L14	RPL14	6.38187	6.11495	6.2039	3.58753	3.30522	3.40385	10.0452	9.77825	9.8672					13	13	13	47	23432	31.725	30571000000	97	215	6
388	6.231	1.71544e+06	Q1	F8VVA7;P61923;P61923-4;F8VYZ4;P61923-5;F8VXB1;F8W156;F8W651;P61923-3;F8VXR1;F8VYK5;F8VUC5;F8VYE0;P61923-2	F8VVA7;P61923;P61923-4;F8VYZ4;P61923-5;F8VXB1;F8W156;F8W651;P61923-3;F8VXR1	Coatomer subunit zeta-1	COPZ1	6.31883	6.1848	6.1894	3.5245	3.37507	3.38935	9.90295	9.76892	9.77352					8	8	8	58.1	22340	187.5	23206000000	74	198	5
389	6.23	1.7085e+06	Q1	Q01518;Q5T0R1;Q5T0R4;Q5T0R3;Q5T0R2;Q5T0R7;Q5T0R6;Q5T0R5;Q5T0S3	Q01518	Adenylyl cyclase-associated protein 1	CAP1	6.18678	6.21725	6.28708	3.39245	3.40751	3.48703	10.5191	10.5495	10.6194					43	43	1	4.8	51901	323.31	146210000000	530	475	28
390	6.23	1.70775e+06	Q1	Q15717;Q15717-2;M0QZR9;M0R055;B1APY9;B1APY8;A0A0A0MRX1;A0A0R4J2E6;Q12926-2;Q12926;P26378-4;P26378-2;P26378-5;P26378;P26378-3;B1AM48	Q15717;Q15717-2	ELAV-like protein 1	ELAVL1	6.15738	6.27943	6.25183	3.36305	3.4697	3.45179	10.273	10.395	10.3674					20	20	20	70.9	36091	323.31	85969000000	218	326	17
391	6.228	1.69223e+06	Q1	P67936;P67936-2;K7ENT6;K7EMU5;K7ERG3;K7EPV9;K7EPB9	P67936;P67936-2;K7ENT6	Tropomyosin alpha-4 chain	TPM4	6.2291	6.20313	6.25102	3.43477	3.39339	3.45097	10.2904	10.2644	10.3123					21	21	10	41.5	28521	323.31	89801000000	229	248	15
392	6.227	1.69118e+06	Q1	P00492	P00492	Hypoxanthine-guanine phosphoribosyltransferase	HPRT1	6.20206	6.20859	6.27131	3.40772	3.39886	3.47126	10.2012	10.2077	10.2704					15	15	15	80.7	24579	271.85	73352000000	219	218	13
393	6.226	1.68754e+06	Q1	Q9H4M9;A0A024R571;C9JC03;C9J2Z4;C9JDQ8;C9JIJ3;C9IZH1	Q9H4M9;A0A024R571;C9JC03;C9J2Z4	EH domain-containing protein 1	EHD1	6.2459	6.21846	6.21351	3.45157	3.40873	3.41346	10.529	10.5015	10.4966					49	49	31	62	60626	323.31	124510000000	528	534	25
394	6.226	1.68342e+06	Q1	P42677;Q5T4L4	P42677;Q5T4L4	40S ribosomal protein S27	RPS27	6.279	6.19654	6.20119	3.48467	3.3868	3.40114	9.70822	9.62575	9.63041					6	1	1	13.1	9461	5.3186	19393000000	24	84	3.5
395	6.224	1.67678e+06	Q1	Q9Y265;Q9Y265-2;E7ETR0;H7C4G5;J3QLR1;H7C4I3	Q9Y265;Q9Y265-2;E7ETR0	RuvB-like 1	RUVBL1	6.23863	6.20563	6.22809	3.4443	3.39589	3.42804	10.4025	10.3695	10.392					31	31	31	79.4	50227	323.31	103420000000	399	456	19
396	6.224	1.67623e+06	Q1	P60891;P60891-2;B1ALA9;B7ZB02;B1ALA7	P60891;P60891-2;B1ALA9	Ribose-phosphate pyrophosphokinase 1	PRPS1	6.23165	6.18644	6.25272	3.43731	3.37671	3.45268	10.2629	10.2177	10.284					24	24	7	24.2	34834	230.58	68036000000	228	318	14
397	6.222	1.67142e+06	Q1	C9J0K6;P30626-2;P30626;P30626-3;B4DHQ6	C9J0K6;P30626-2;P30626;P30626-3;B4DHQ6	Sorcin	SRI	6.2531	6.23507	6.17756	3.45877	3.42533	3.37751	10.2174	10.1994	10.1419					18	18	18	87.1	17605	323.31	63573000000	161	155	12
398	6.222	1.66996e+06	Q1	P30048;P30048-2	P30048;P30048-2	Thioredoxin-dependent peroxide reductase, mitochondrial	PRDX3	6.26117	6.21558	6.18823	3.46684	3.40584	3.38818	10.3077	10.2621	10.2348					13	13	13	62.5	27692	305.48	76612000000	132	256	14.5
399	6.218	1.65489e+06	Q1	P54577;A0A0C4DGZ5	P54577;A0A0C4DGZ5	Tyrosine--tRNA ligase, cytoplasmic;Tyrosine--tRNA ligase, cytoplasmic, N-terminally processed;Tyrosine--tRNA ligase	YARS	6.21449	6.25327	6.1859	3.42015	3.44354	3.38586	10.6115	10.6503	10.5829					55	55	55	80.1	59143	323.31	158580000000	543	528	32.5
400	6.218	1.6515e+06	Q1	P28838-2;P28838;H0Y9Q1	P28838-2;P28838	Cytosol aminopeptidase	LAP3	6.21006	6.21837	6.22508	3.41572	3.40864	3.42503	10.5424	10.5507	10.5574					43	43	38	80.5	52771	323.31	142220000000	523	488	28
401	6.216	1.64561e+06	Q1	P56537;P56537-2;B7ZBH1;A0A0B4J1Y7;A0A0U1RQV5;F8WD20;F8WDS6	P56537;P56537-2	Eukaryotic translation initiation factor 6	EIF6	6.20929	6.22419	6.21329	3.41495	3.41446	3.41324	10.0944	10.1093	10.0984					12	12	12	78.4	26599	323.31	45336000000	132	245	10
402	6.214	1.64299e+06	Q1	O75083;O75083-3;D6RD66	O75083;O75083-3	WD repeat-containing protein 1	WDR1	6.2271	6.21633	6.1991	3.43277	3.40659	3.39905	10.5188	10.508	10.4908					38	38	38	84	66193	323.31	115210000000	316	606	25.5
403	6.212	1.63805e+06	Q1	Q14152;Q14152-2	Q14152;Q14152-2	Eukaryotic translation initiation factor 3 subunit A	EIF3A	6.18418	6.22011	6.23079	3.38984	3.41038	3.43075	10.8214	10.8573	10.868					150	150	150	73.9	166570	323.31	288760000000	1414	1382	56.5
404	6.212	1.63446e+06	Q1	P14625;Q96GW1;A0A1W2PRR1;H0YIV0;F8W026;F8VPC7	P14625	Endoplasmin	HSP90B1	6.19498	6.26492	6.17501	3.40065	3.45519	3.37496	10.6822	10.7521	10.6622					66	64	54	64.8	92468	323.31	207870000000	750	803	40
405	6.209	1.63206e+06	Q1	Q13243;Q13243-3;B4DJK0;B4DUA4;G3V5K8;Q13243-2	Q13243;Q13243-3;B4DJK0;B4DUA4;G3V5K8;Q13243-2	Serine/arginine-rich splicing factor 5	SRSF5	6.21267	6.17571	6.2377	3.41834	3.36597	3.43765	9.75103	9.71407	9.77606					12	11	11	40.8	31263	211.55	19568000000	78	272	4.5
406	6.208	1.62985e+06	Q1	Q13509;A0A0B4J269;Q13509-2;G3V2A3;G3V5W4;G3V2R8;G3V3R4;G3V2N6;G3V3J6;G3V3W7	Q13509;A0A0B4J269;Q13509-2	Tubulin beta-3 chain	TUBB3	6.26243	6.24765	6.11313	3.4681	3.43792	3.31308	10.4486	10.4338	10.2993					32	16	11	35.3	50432	323.31	119070000000	323	450	20
407	6.205	1.6197e+06	Q1	Q02543;M0R117;M0R0P7	Q02543;M0R117;M0R0P7	60S ribosomal protein L18a	RPL18A	6.34105	6.13838	6.13626	3.54671	3.32865	3.33621	10.1804	9.97777	9.97565					18	18	2	9.7	20762	305.21	42469000000	183	176	9
408	6.203	1.59833e+06	Q1	P62195;P62195-2;J3QQM1;J3QSA9;J3KRP2;J3QLH6;J3QSE0;J3QRW1;J3QRR3;J3KTQ9	P62195;P62195-2;J3QQM1;J3QSA9;J3KRP2	26S protease regulatory subunit 8	PSMC5	6.22534	6.20531	6.17911	3.43101	3.39558	3.37906	10.3409	10.3209	10.2947					39	38	38	76.4	45626	323.31	85596000000	410	406	17
409	6.202	1.59404e+06	Q1	Q13242;H0YIB4;S4R3G0	Q13242;H0YIB4;S4R3G0	Serine/arginine-rich splicing factor 9	SRSF9	6.22758	6.17118	6.20616	3.43325	3.36144	3.40611	10.0158	9.95942	9.9944					28	27	27	66.1	25542	183.78	41479000000	215	221	8
410	6.2	1.59316e+06	Q1	F5GZS6;P08195;J3KPF3;P08195-3;P08195-4;F5GZI0;H0YFS2;H0YFX4	F5GZS6;P08195;J3KPF3;P08195-3;P08195-4	4F2 cell-surface antigen heavy chain	SLC3A2	6.18955	6.21399	6.19738	3.39522	3.40426	3.39733	10.5219	10.5463	10.5297					46	46	4	15.2	64872	323.31	141770000000	421	599	28
411	6.199	1.58679e+06	Q1	Q07021;I3L3Q7;I3L3B0	Q07021;I3L3Q7;I3L3B0	Complement component 1 Q subcomponent-binding protein, mitochondrial	C1QBP	6.19056	6.26706	6.14043	3.39623	3.45733	3.34038	9.92081	9.99731	9.87068					10	10	10	52.5	31362	182.24	32085000000	117	282	7
412	6.199	1.58644e+06	Q1	Q13442;F8WBW6	Q13442	28 kDa heat- and acid-stable phosphoprotein	PDAP1	6.19329	6.22344	6.18035	3.39896	3.41371	3.38031	9.92354	9.95369	9.9106					16	16	16	59.1	20630	312.35	34013000000	131	181	7
413	6.199	1.58323e+06	Q1	E9PQ56	E9PQ56		PUF60	6.16399	6.20778	6.22463	3.36966	3.39805	3.42458	10.2252	10.269	10.2859					20	20	2	9.6	34428	323.31	68911000000	256	322	15
414	6.198	1.58273e+06	Q1	Q02790;F5H1U3;H0YFG2;F5H120	Q02790	Peptidyl-prolyl cis-trans isomerase FKBP4;Peptidyl-prolyl cis-trans isomerase FKBP4, N-terminally processed	FKBP4	6.13768	6.2277	6.22996	3.34334	3.41797	3.42991	10.5142	10.6042	10.6065					54	54	54	87.8	51804	323.31	141570000000	529	459	31
415	6.198	1.58197e+06	Q1	P04843;B7Z4L4;F8WF32	P04843;B7Z4L4	Dolichyl-diphosphooligosaccharide--protein glycosyltransferase subunit 1	RPN1	6.16126	6.21212	6.22181	3.36693	3.40239	3.42177	10.5649	10.6158	10.6255					48	48	48	69.9	68569	323.31	158060000000	456	607	33
416	6.197	1.58119e+06	Q1	Q9P258	Q9P258	Protein RCC2	RCC2	6.17827	6.25454	6.15808	3.38393	3.44481	3.35804	10.4948	10.5711	10.4746					34	34	34	67	56084	323.31	127660000000	359	522	27
417	6.197	1.57747e+06	Q1	P15121;E9PCX2;E9PEF9	P15121;E9PCX2	Aldose reductase	AKR1B1	6.19313	6.20696	6.18962	3.39879	3.39722	3.38957	10.2824	10.2962	10.2789					26	26	25	81.3	35853	323.31	77840000000	224	316	16
418	6.195	1.57265e+06	Q1	Q9Y2V2;H3BUY4;H3BPY5;H3BNU9;H3BSW7;H3BTK3;I3L3X8	Q9Y2V2;H3BUY4;H3BPY5;H3BNU9;H3BSW7	Calcium-regulated heat stable protein 1	CARHSP1	6.12997	6.24632	6.20959	3.33563	3.43658	3.40955	9.71409	9.83043	9.79371					10	10	10	85.7	15892	127.65	22800000000	85	147	5
419	6.193	1.56937e+06	Q1	O00571;A0A0D9SFB3;A0A0D9SG12;A0A0D9SF53;O00571-2;O15523-2;O15523;A0A0J9YYH6;O15523-3;B4DLA0;C9J081;A0A087WVZ1;C9J8G5;A0A087WX09;D6RCM4;Q9NQI0-3;Q9NQI0-2;Q9NQI0-4;Q9NQI0;H0Y960	O00571;A0A0D9SFB3;A0A0D9SG12;A0A0D9SF53;O00571-2;O15523-2;O15523	ATP-dependent RNA helicase DDX3X;ATP-dependent RNA helicase DDX3Y	DDX3X;DDX3Y	6.15714	6.20451	6.21819	3.36281	3.39478	3.41814	10.6334	10.6807	10.6944					68	68	57	64	73243	323.31	177430000000	911	662	39
420	6.193	1.56336e+06	Q1	Q13148;A0A087WX29;Q13148-4	Q13148;A0A087WX29	TAR DNA-binding protein 43	TARDBP	6.21188	6.24187	6.12515	3.41754	3.43214	3.3251	10.1762	10.2062	10.0895					19	19	1	4.3	44739	323.31	55926000000	321	414	12
421	6.192	1.55739e+06	Q1	P53396;P53396-2;P53396-3;K7EIE7;K7ESG8	P53396;P53396-2;P53396-3	ATP-citrate synthase	ACLY	6.19366	6.19593	6.18755	3.39933	3.3862	3.38751	10.8497	10.8519	10.8436					84	84	84	68.7	120840	323.31	289920000000	977	1101	59
422	6.191	1.5565e+06	Q1	Q96AE4;E9PEB5	Q96AE4;E9PEB5	Far upstream element-binding protein 1	FUBP1	6.151	6.23674	6.1839	3.35667	3.427	3.38385	10.5133	10.599	10.5462					44	44	3	7.1	67560	323.31	141770000000	436	644	30
423	6.19	1.55594e+06	Q1	Q16181;E7ES33;E7EPK1;Q16181-2;G3V1Q4;A0A0U1RRM2;Q5JXL7;A0A0U1RRE1;A0A0U1RRH9;A0A0U1RRD1;A0A0U1RQK0;Q6ZU15	Q16181;E7ES33;E7EPK1;Q16181-2;G3V1Q4	Septin-7	2017-09-07	6.15684	6.17008	6.24432	3.36251	3.36035	3.44427	10.4037	10.417	10.4912					36	35	34	68.2	50679	323.31	120770000000	370	437	23
424	6.188	1.54612e+06	Q1	P25786;P25786-2;F5GX11;B4DEV8;F5H112	P25786;P25786-2;F5GX11	Proteasome subunit alpha type-1	PSMA1	6.14313	6.21471	6.20641	3.3488	3.40498	3.40637	10.2587	10.3303	10.322					23	23	23	90.1	29555	323.31	78672000000	276	263	17
425	6.187	1.54385e+06	Q1	Q15819;G3V113;H0YBP9;H0YBX6	Q15819;G3V113;H0YBP9;H0YBX6	Ubiquitin-conjugating enzyme E2 variant 2	UBE2V2	6.15208	6.23825	6.17068	3.35774	3.42852	3.37064	9.94032	10.0265	9.95892					14	14	7	46.9	16363	113.75	41006000000	121	145	8
426	6.186	1.53809e+06	Q1	P41250;H7C443;F8WCK4	P41250	Glycine--tRNA ligase	GARS	6.16355	6.22102	6.1742	3.36922	3.41129	3.37415	10.6508	10.7082	10.6614					61	61	61	75.9	83165	323.31	192930000000	801	739	40
427	6.181	1.53696e+06	Q1	Q14444-2;Q14444;G3V153;E9PLA9	Q14444-2;Q14444;G3V153;E9PLA9	Caprin-1	CAPRIN1	6.17393	6.15341	6.21564	3.3796	3.34367	3.41559	10.3378	10.3173	10.3795					29	29	29	48.6	76861	323.31	87140000000	274	694	19
428	6.18	1.51974e+06	Q1	P27824;P27824-2;P27824-3;H0Y9Q7;D6RDP7;D6RGY2;D6RB85;D6RFL1;D6RAU8;H0Y9H1;D6RAQ8;D6RHJ3;D6RD16	P27824;P27824-2;P27824-3	Calnexin	CANX	6.08399	6.27052	6.1856	3.28966	3.46079	3.38556	10.4743	10.6608	10.5759					47	47	47	58.1	67567	323.31	157400000000	466	592	32
429	6.179	1.51708e+06	Q1	Q9Y696;A6PVS0;O15247	Q9Y696	Chloride intracellular channel protein 4	CLIC4	6.15858	6.151	6.22884	3.36425	3.34127	3.42879	10.2198	10.2122	10.2901					24	24	23	82.2	28772	323.31	78086000000	310	253	15
430	6.179	1.51674e+06	Q1	Q9Y333	Q9Y333	U6 snRNA-associated Sm-like protein LSm2	LSM2	6.23576	6.17772	6.12212	3.44143	3.36799	3.32207	9.89906	9.84102	9.78542					8	8	8	76.8	10834	235.35	26205000000	88	95	6
431	6.178	1.51318e+06	Q1	O43396;K7ER96;K7EML9;K7EPB7;K7EKG2;K7EME7	O43396;K7ER96	Thioredoxin-like protein 1	TXNL1	6.12106	6.18098	6.23073	3.32673	3.37124	3.43068	10.1823	10.2422	10.292					22	22	22	89.3	32251	323.31	68013000000	325	289	15
432	6.178	1.5054e+06	Q1	P43490;A0A0C4DFS8;C9JG65;C9JF35	P43490;A0A0C4DFS8	Nicotinamide phosphoribosyltransferase	NAMPT	6.17547	6.18597	6.17128	3.38114	3.37623	3.37124	10.4586	10.4691	10.4544					34	34	34	75.4	55520	323.31	107200000000	346	491	25
433	6.175	1.50528e+06	Q1	O14579;O14579-3;O14579-2;M0R061	O14579;O14579-3;O14579-2	Coatomer subunit epsilon	COPE	6.11808	6.18529	6.22188	3.32375	3.37555	3.42183	10.1172	10.1844	10.221					24	24	1	6.5	34482	323.31	56539000000	268	308	13
434	6.173	1.50377e+06	Q1	P17096;P17096-3	P17096;P17096-3	High mobility group protein HMG-I/HMG-Y	HMGA1	6.17858	6.24516	6.09657	3.38424	3.43543	3.29652	9.87664	9.94322	9.79463					8	8	3	23.4	11676	259.4	31798000000	75	107	6.5
435	6.171	1.48904e+06	Q1	O43324;D6RBD7;C9J1V9;O43324-2;H0YAL7;D6RCQ0;H0YAH9	O43324;D6RBD7;C9J1V9;O43324-2;H0YAL7	Eukaryotic translation elongation factor 1 epsilon-1	EEF1E1;EEF1E1-BLOC1S5	6.18155	6.14863	6.18382	3.38722	3.3389	3.38377	10.0667	10.0338	10.069					12	12	12	83.3	19810	171.13	43132000000	104	174	10
436	6.17	1.48466e+06	Q1	P09496-2;P09496-4;P09496-3;P09496;F8WF69;P09496-5;C9J8P9	P09496-2;P09496-4;P09496-3;P09496;F8WF69;P09496-5	Clathrin light chain A	CLTA	6.1868	6.19386	6.13026	3.39247	3.38412	3.33021	9.91705	9.9241	9.86051					12	12	12	38.5	23662	323.31	37574000000	96	218	7
437	6.163	1.48328e+06	Q1	Q15691	Q15691	Microtubule-associated protein RP/EB family member 1	MAPRE1	6.17983	6.15318	6.15461	3.3855	3.34345	3.35456	10.2411	10.2144	10.2158					23	23	20	82.1	29999	323.31	70167000000	290	268	15
438	6.162	1.45603e+06	Q1	Q96AG4;I3L223	Q96AG4	Leucine-rich repeat-containing protein 59	LRRC59	6.19971	6.14397	6.14339	3.40537	3.33424	3.34335	10.231	10.1753	10.1747					18	18	18	54.7	34930	323.31	58952000000	130	307	14
439	6.161	1.456e+06	Q1	Q14011;K7EJV1;K7EMY9;K7EQR7;D6W5Y5;Q14011-2;K7EJV5;K7ER40;K7ENX8;K7ELV6;K7ELT6;Q14011-3;K7EQX4;K7ENN6;K7EIF7;K7EQL0	Q14011;K7EJV1;K7EMY9;K7EQR7;D6W5Y5;Q14011-2;K7EJV5;K7ER40	Cold-inducible RNA-binding protein	CIRBP	6.1303	6.20699	6.14602	3.33596	3.39725	3.34598	9.96969	10.0464	9.98542					11	11	2	10.5	18648	238.99	38065000000	104	172	9
440	6.161	1.4545e+06	Q1	P51149;C9J592;C9J8S3;C9J4V0;C9J4S4;C9IZZ0;C9J7D1	P51149;C9J592;C9J8S3;C9J4V0	Ras-related protein Rab-7a	RAB7A	6.1521	6.22218	6.10744	3.35776	3.41245	3.3074	10.0786	10.1487	10.034					21	21	21	86.5	23489	323.31	49179000000	171	207	11
441	6.157	1.45338e+06	Q1	Q13347;Q5TFK1	Q13347	Eukaryotic translation initiation factor 3 subunit I	EIF3I	6.1492	6.15589	6.16651	3.35487	3.34616	3.36646	10.3131	10.3198	10.3304					28	28	28	89.5	36501	323.31	86104000000	270	325	19
442	6.155	1.43635e+06	Q1	Q15019;Q15019-2;Q15019-3;B5MCX3;C9J2Q4;C9JB25;H7C2Y0;C9J938;C9IY94;C9IZU3;H7C310;C9JQJ4;C9JZI2;B5MD47;A0A1B0GXJ2;C9JFT1;F8WB65;C9JT15;C9JSE7;H7C1T1	Q15019;Q15019-2;Q15019-3;B5MCX3;C9J2Q4	Septin-2	2017-09-02	6.13869	6.15795	6.16919	3.34436	3.34822	3.36914	10.3461	10.3653	10.3766					40	40	39	88.4	41487	323.31	99642000000	383	361	21
443	6.155	1.43482e+06	Q1	Q92945;A0A087WTP3;M0R0I5;M0QYH3;M0R3J3;M0QXW7;M0R0C6;M0R251;M0QYG1;M0R263	Q92945;A0A087WTP3	Far upstream element-binding protein 2	KHSRP	6.15647	6.15843	6.1491	3.36214	3.3487	3.34905	10.5794	10.5814	10.5721					43	40	40	63.2	73114	323.31	162010000000	519	711	34.5
444	6.151	1.4304e+06	Q1	Q9C005	Q9C005	Protein dpy-30 homolog	DPY30	6.24895	6.10481	6.09951	3.45462	3.29508	3.29947	9.73616	9.59202	9.58672					6	6	6	82.8	11250	110.88	14964000000	95	99	4
445	6.151	1.42787e+06	Q1	O95336;M0R261;M0R0U3;M0R1L2	O95336;M0R261	6-phosphogluconolactonase	PGLS	6.14504	6.16326	6.14471	3.35071	3.35353	3.34466	10.1094	10.1276	10.109					17	17	17	93	27547	323.31	45542000000	154	258	12
446	6.15	1.41711e+06	Q1	Q99471;H3BPF6;Q99471-3;H3BMQ1;Q99471-2;F8VNW6;F8VQZ2	Q99471;H3BPF6;Q99471-3;H3BMQ1	Prefoldin subunit 5	PFDN5	6.17005	6.11961	6.16074	3.37572	3.30988	3.36069	9.9003	9.84986	9.89099					10	10	10	77.9	17328	192.81	30429000000	139	154	7
447	6.146	1.41609e+06	Q1	O14737;O14737-2;K7ESJ4;K7EQA1;Q3HM38;X6R2P6	O14737;O14737-2;K7ESJ4;K7EQA1	Programmed cell death protein 5	PDCD5	6.16652	6.05684	6.21595	3.37219	3.24711	3.41591	9.95476	9.84508	10.0042					12	12	12	74.4	14285	85.143	39130000000	64	125	8
448	6.146	1.41475e+06	Q1	Q15370;Q15370-2;B8ZZU8;A0A0B4J296;I3L0M9	Q15370;Q15370-2;B8ZZU8;A0A0B4J296;I3L0M9	Transcription elongation factor B polypeptide 2	TCEB2	6.16613	6.12972	6.14199	3.3718	3.31999	3.34195	10.0055	9.96912	9.98139					10	10	10	98.3	13133	225.37	42502000000	123	118	9
449	6.145	1.40028e+06	Q1	Q9Y285;Q9Y285-2;K7EPH2;K7ER16;K7EK06;K7ERS0	Q9Y285;Q9Y285-2;K7EPH2;K7ER16	Phenylalanine--tRNA ligase alpha subunit	FARSA	6.17584	6.12703	6.13142	3.38151	3.3173	3.33137	10.3163	10.2675	10.2718					31	31	2	2.4	57563	323.31	83212000000	332	508	18
450	6.142	1.39743e+06	Q1	Q9UI30;Q9UI30-2;F5GX77;F5GYQ2	Q9UI30;Q9UI30-2;F5GX77;F5GYQ2	Multifunctional methyltransferase subunit TRM112-like protein	TRMT112	6.16169	6.16923	6.09578	3.36736	3.3595	3.29574	9.89194	9.89948	9.82603					8	8	8	81.6	14199	140.25	29597000000	68	125	7
451	6.142	1.39145e+06	Q1	P07814;V9GYZ6;V9GZ76	P07814;V9GYZ6	Bifunctional glutamate/proline--tRNA ligase;Glutamate--tRNA ligase;Proline--tRNA ligase	EPRS	6.13694	6.15056	6.13887	3.34261	3.34083	3.33883	10.8514	10.865	10.8533					120	120	119	77.8	170590	323.31	284380000000	1147	1512	67.5
452	6.142	1.3881e+06	Q1	P51571;A6NLM8	P51571;A6NLM8	Translocon-associated protein subunit delta	SSR4	6.13641	6.16557	6.12424	3.34207	3.35584	3.3242	9.83447	9.86363	9.82231					8	8	8	41.6	18998	119.15	25120000000	71	173	6.5
453	6.139	1.38729e+06	Q1	P10768;X6RA14;H7BZT7;U3KQT1	P10768;X6RA14;H7BZT7	S-formylglutathione hydrolase	ESD	6.13827	6.13728	6.14053	3.34394	3.32755	3.34048	10.1026	10.1016	10.1049					20	20	20	88.7	31462	323.31	53148000000	225	282	12
454	6.137	1.37636e+06	Q1	O43852;O43852-3;O43852-6;O43852-5;O43852-10;O43852-15;O43852-9;H0Y875;O43852-11;O43852-13;O43852-14;O43852-12	O43852;O43852-3;O43852-6;O43852-5;O43852-10;O43852-15;O43852-9	Calumenin	CALU	6.10144	6.18945	6.12028	3.3071	3.37972	3.32023	10.0658	10.1538	10.0846					30	30	6	14.9	37106	323.31	60569000000	367	315	12
455	6.137	1.37625e+06	Q1	P31689;P31689-2	P31689;P31689-2	DnaJ homolog subfamily A member 1	DNAJA1	6.12379	6.11931	6.16769	3.32945	3.30957	3.36764	10.2877	10.2832	10.3316					34	34	34	76.3	44868	323.31	78278000000	347	397	19
456	6.137	1.37478e+06	Q1	P29692-2;E9PRY8;A0A087X1X7;E9PIZ1;H0YE72;H0YCK7;H0YE58;E9PQC9;E9PQR8;E9PKH7;E9PNC8;E9PPY1;E9PJV8;E9PN56;E9PN71;E9PRL0	P29692-2;E9PRY8;A0A087X1X7		EEF1D	6.12478	6.14609	6.13867	3.33045	3.33636	3.33862	10.4723	10.4936	10.4862					38	38	2	4.8	71407	323.31	122610000000	285	647	29
457	6.136	1.37347e+06	Q1	Q13247-3;Q13247;Q13247-2	Q13247-3;Q13247	Serine/arginine-rich splicing factor 6	SRSF6	6.13158	6.1837	6.09342	3.33724	3.37397	3.29338	10.1928	10.2449	10.1547					20	20	14	27.8	38418	270.66	57097000000	153	335	15
458	6.136	1.3724e+06	Q1	Q5T5C7	Q5T5C7		SARS	6.14	6.11385	6.1538	3.34567	3.30411	3.35375	10.4876	10.4614	10.5014					52	52	2	3.5	61312	323.31	118460000000	452	536	29
459	6.135	1.36963e+06	Q1	Q58FF8	Q58FF8	Putative heat shock protein HSP 90-beta 2	HSP90AB2P	6.10238	6.20382	6.10023	3.30805	3.39409	3.30018	10.2886	10.39	10.2864					16	1	1	3.9	44348	56.664	87862000000	140	381	20
460	6.133	1.36835e+06	Q1	P22102;P22102-2;F8WD69;C9JBJ1;C9JTV6;C9JZG2;C9JKQ7;A0A140TA71;H7C366	P22102	Trifunctional purine biosynthetic protein adenosine-3;Phosphoribosylamine--glycine ligase;Phosphoribosylformylglycinamidine cyclo-ligase;Phosphoribosylglycinamide formyltransferase	GART	6.13778	6.12292	6.1391	3.34344	3.31318	3.33905	10.7042	10.6893	10.7055					60	60	60	73.3	107770	323.31	200240000000	648	1010	48
461	6.131	1.36446e+06	Q1	P13761;A0A140T958;Q9TQE0;P79483;A0A182DWH4	P13761;A0A140T958;Q9TQE0	HLA class II histocompatibility antigen, DRB1-7 beta chain;HLA class II histocompatibility antigen, DRB1-9 beta chain	HLA-DRB1	6.04607	6.18486	6.16163	3.25174	3.37513	3.36158	10.1073	10.2461	10.2229					16	16	8	25.9	29822	323.31	59487000000	156	266	15
462	6.131	1.35933e+06	Q1	O43143	O43143	Pre-mRNA-splicing factor ATP-dependent RNA helicase DHX15	DHX15	6.10965	6.16038	6.1223	3.31532	3.35065	3.32226	10.5859	10.6366	10.5985					58	58	57	66.7	90932	323.31	175750000000	684	795	39
463	6.13	1.35307e+06	Q1	P68431	P68431	Histone H3.1	HIST1H3A	5.83621	6.27453	6.27868	3.04187	3.4648	3.47864	9.32342	9.76174	9.76589	+				15	2	2	26.5	15404	55.109	22029000000	113	136	4
464	6.129	1346503	Q1	P52815	P52815	39S ribosomal protein L12, mitochondrial	MRPL12	6.12779	6.13083	6.129	3.33345	3.3211	3.32895	9.91603	9.91907	9.91724					9	9	1	6.6	21348	99.996	32088000000	84	198	8
465	6.127	1.34274e+06	Q1	P49721;A0A087WVV1	P49721	Proteasome subunit beta type-2	PSMB2	6.13476	6.15256	6.09465	3.34042	3.34282	3.29461	10.0199	10.0377	9.9798					22	22	22	90	22836	323.31	45871000000	194	201	10
466	6.127	1.34206e+06	Q1	Q9UHD8-4;Q9UHD8-9;Q9UHD8-3;Q9UHD8-8;Q9UHD8-7;Q9UHD8-2;Q9UHD8-5;Q9UHD8;K7EL40;K7EK18;K7ER52;K7EIE4;K7EQD7;K7ELJ9;K7EJZ2;K7EIR4;K7EKN4;K7EN52;K7ENQ5;K7ER14;K7EQ08;K7EJL9	Q9UHD8-4;Q9UHD8-9;Q9UHD8-3;Q9UHD8-8;Q9UHD8-7;Q9UHD8-2;Q9UHD8-5;Q9UHD8;K7EL40;K7EK18	Septin-9	2017-09-09	6.1512	6.14812	6.08038	3.35687	3.33839	3.28033	10.4513	10.4482	10.3805					26	26	26	78.5	38518	323.31	112080000000	271	335	26
467	6.125	1.33994e+06	Q1	J3QT28;O43684-2;O43684;J3QSX4	J3QT28;O43684-2;O43684	Mitotic checkpoint protein BUB3	BUB3	6.13868	6.16461	6.0729	3.34435	3.35488	3.27286	10.1999	10.2258	10.1341					22	22	22	80.6	31703	323.31	64578000000	195	278	15
468	6.123	1.32969e+06	Q1	P47756-2;B1AK87;B1AK88;P47756;B1AK85	P47756-2;B1AK87;B1AK88;P47756;B1AK85	F-actin-capping protein subunit beta	CAPZB	6.10851	6.16066	6.09955	3.31417	3.35093	3.2995	10.1978	10.2499	10.1888					28	28	28	76.8	30628	323.31	65819000000	283	272	16
469	6.122	1.32831e+06	Q1	Q00325-2;Q00325;F8VVM2;F8VWQ0;F8VZL5;F8VWR4;F8VY00;F8VYH5	Q00325-2;Q00325;F8VVM2	Phosphate carrier protein, mitochondrial	SLC25A3	6.1008	6.10723	6.15945	3.30647	3.2975	3.35941	10.2412	10.2477	10.2999					25	25	25	63.2	39958	256.1	78632000000	244	361	18
470	6.121	1.32293e+06	Q1	Q9UKY7;Q9UKY7-2;H0Y8K3;D6R9V8;D6RFH2;Q9UKY7-3;D6RDN0;D6RAV0;D6R973	Q9UKY7;Q9UKY7-2;H0Y8K3	Protein CDV3 homolog	CDV3	6.09556	6.13166	6.13626	3.30122	3.32192	3.33622	10.0221	10.0582	10.0628					14	14	14	74.4	27335	323.31	45175000000	162	258	11
471	6.12	1.32284e+06	Q1	A0A087WUK2;O14979	A0A087WUK2;O14979	Heterogeneous nuclear ribonucleoprotein D-like	HNRNPDL	6.0673	6.13115	6.16088	3.27297	3.32142	3.36083	10.2642	10.328	10.3578					20	18	3	17.1	40040	319.9	83635000000	196	363	20.5
472	6.119	1.31738e+06	Q1	P50453;H7BXK7;C9J7N5;A0A0C4DGW9;P50452-3;O75830	P50453	Serpin B9	SERPINB9	6.10126	6.10323	6.15267	3.30692	3.29349	3.35263	10.3288	10.3308	10.3803					30	30	27	73.4	42403	323.31	87488000000	311	376	22
473	6.115	1.3172e+06	Q1	Q9Y230;Q9Y230-2;M0R0Y3;X6R2L4;M0QXI6;M0R0Z0;M0QXZ7;A0A1W2PS48;A0A1W2PS22	Q9Y230;Q9Y230-2;M0R0Y3	RuvB-like 2	RUVBL2	6.14179	6.12626	6.07771	3.34746	3.31653	3.27767	10.4071	10.3916	10.3431					46	46	46	89	51156	323.31	102200000000	459	463	24
474	6.115	1.31366e+06	Q1	A8K878;P55145;H7C2D6	A8K878;P55145	Mesencephalic astrocyte-derived neurotrophic factor	MANF	6.06801	6.08545	6.19145	3.27368	3.27571	3.39141	9.95316	9.9706	10.0766					16	16	16	50.3	21143	181.38	41526000000	117	185	10
475	6.115	1.31322e+06	Q1	Q9UKK9;A6NFX8;A6NJU6;A6NCQ0;C9JYY9;H0YEY4	Q9UKK9;A6NFX8;A6NJU6	ADP-sugar pyrophosphatase	NUDT5	6.1114	6.07472	6.15768	3.31707	3.26498	3.35763	10.0379	10.0013	10.0842					16	16	16	73.1	24327	209.25	38803000000	165	219	11
476	6.115	1.30695e+06	Q1	P13995;P13995-2;B9A062;B8ZZU9;F8WF06;F8WF89	P13995;P13995-2;B9A062;B8ZZU9	Bifunctional methylenetetrahydrofolate dehydrogenase/cyclohydrolase, mitochondrial;NAD-dependent methylenetetrahydrofolate dehydrogenase;Methenyltetrahydrofolate cyclohydrolase	MTHFD2	6.08429	6.13755	6.12177	3.28996	3.32781	3.32172	10.1999	10.2531	10.2374					37	37	37	85.1	37895	323.31	70434000000	363	350	17
477	6.114	1.30648e+06	Q1	Q13838;Q13838-2;Q5STU3;F6WLT2;A0A0G2JJZ9;A0A140T9X3;A0A0A0MT12;F6TRA5;F6S4E6;A0A140T996;A0A140T9X9;F6UJC5;A0A140TA18;A0A140T973;A0A140T9K1;A0A140T9L4;F6R6M7;F6QYI9;A0A0G2JJL7;A0A140T9K2;A0A140T9N3;F6U6E2;H0YCC6;A0A0G2JHN7;F6S2B7;H0Y400	Q13838;Q13838-2;Q5STU3;F6WLT2;A0A0G2JJZ9;A0A140T9X3;A0A0A0MT12;F6TRA5;F6S4E6;A0A140T996;A0A140T9X9;F6UJC5;A0A140TA18	Spliceosome RNA helicase DDX39B	DDX39B	6.08951	6.11191	6.14162	3.29518	3.30218	3.34158	10.0539	10.0762	10.1059					35	19	19	50.2	48991	309.57	54716000000	261	428	12
478	6.114	1.30595e+06	Q1	Q9Y266;A0A0A0MSU9;A0A0A0MSS4	Q9Y266	Nuclear migration protein nudC	NUDC	6.06572	6.13932	6.13677	3.27139	3.32958	3.33672	10.2731	10.3467	10.3441					33	33	33	81.6	38242	323.31	92652000000	322	331	21
479	6.114	1.30457e+06	Q1	P46779;H0YKD8;P46779-2;P46779-3;H0YLP6;H0YMF4;P46779-4;P46779-5	P46779;H0YKD8;P46779-2;P46779-3;H0YLP6;H0YMF4;P46779-4;P46779-5	60S ribosomal protein L28	RPL28	6.11643	6.13295	6.09179	3.3221	3.32322	3.29174	9.931	9.94752	9.90636					10	10	10	53.3	15747	25.904	43364000000	91	137	8.5
480	6.113	1.30392e+06	Q1	P61086;D6RDM7;P61086-2;P61086-3;D6RFX1	P61086;D6RDM7;P61086-2;P61086-3	Ubiquitin-conjugating enzyme E2 K	UBE2K	6.15789	6.13901	6.04344	3.36355	3.32927	3.24339	9.97246	9.95358	9.85801					17	17	17	77	22406	287.84	35759000000	167	200	8.5
481	6.113	1303482	Q1	Q9NR30;Q9NR30-2	Q9NR30;Q9NR30-2	Nucleolar RNA helicase 2	DDX21	6.16613	6.06194	6.10975	3.3718	3.25221	3.30971	10.6367	10.5326	10.5804					66	66	64	66.5	87343	323.31	147800000000	654	783	38.5
482	6.113	1.30279e+06	Q1	O75821;K7ENA8;K7EL20;K7ER90;K7EP16;K7ENH0	O75821;K7ENA8;K7EL20;K7ER90	Eukaryotic translation initiation factor 3 subunit G	EIF3G	6.07392	6.12993	6.13385	3.27959	3.3202	3.33381	10.1766	10.2326	10.2365					29	29	20	56.9	35611	323.31	66782000000	188	320	16.5
483	6.112	1.30227e+06	Q1	P68366;P68366-2;C9JEV8;C9JQ00;C9JJQ8;C9JDL2	P68366;P68366-2	Tubulin alpha-4A chain	TUBA4A	6.18881	6.05571	6.0907	3.39448	3.24598	3.29065	10.4064	10.2733	10.3083					35	11	9	32.4	49924	205.44	79973000000	156	448	21.5
484	6.111	1.30033e+06	Q1	O15143;C9J4Z7;F8VXW2;C9JEY1;C9JQM8;C9JFG9;C9J6C8;C9JBJ7;C9K057;C9JTT6;C9JM51;F8WEB3	O15143	Actin-related protein 2/3 complex subunit 1B	ARPC1B	6.07725	6.17118	6.08507	3.28291	3.36145	3.28502	10.2177	10.3116	10.2255					23	22	3	13.2	40949	323.31	65351000000	149	372	18
485	6.111	1.29843e+06	Q1	O14561;H3BNK3;I3L505;H3BNE8	O14561;H3BNK3	Acyl carrier protein, mitochondrial;Acyl carrier protein	NDUFAB1	6.19655	6.00404	6.13289	3.40221	3.19431	3.33284	9.85985	9.66734	9.79619					6	6	6	37.8	17417	24.763	28976000000	69	156	6
486	6.111	1.29806e+06	Q1	P49207	P49207	60S ribosomal protein L34	RPL34	6.22187	6.00772	6.10275	3.42754	3.19799	3.3027	9.88517	9.67102	9.76605					6	6	6	23.1	13293	15.145	19019000000	48	117	6
487	6.11	1.29739e+06	Q1	Q9NR31;Q9NR31-2;H0Y5E8;Q5SQT8	Q9NR31;Q9NR31-2	GTP-binding protein SAR1a	SAR1A	6.04911	6.17386	6.10725	3.25478	3.36413	3.30721	9.86368	9.98843	9.92182					17	17	14	67.7	22367	323.31	37188000000	186	198	8.5
488	6.109	1.28633e+06	Q1	O95777;C9JIZ0;F2Z2Y6;C9JNV3	O95777;C9JIZ0;F2Z2Y6;C9JNV3	U6 snRNA-associated Sm-like protein LSm8	LSM8	6.11553	6.09082	6.12111	3.32119	3.28109	3.32106	9.69965	9.67494	9.70523					8	8	8	99	10403	208.88	20123000000	89	96	5
489	6.109	1.28596e+06	Q1	P18754-2;P18754;C9JW69;C9JRH2;C9JMJ4;C9JQZ4;M0R1Q8	P18754-2;P18754;C9JW69;C9JRH2;C9JMJ4;C9JQZ4	Regulator of chromosome condensation	RCC1	6.09658	6.13349	6.09655	3.30225	3.32376	3.2965	10.1121	10.149	10.112					27	27	7	25.9	48145	323.31	59356000000	235	452	13.5
490	6.108	1.28451e+06	Q1	Q04917;A2IDB2;F8WEB6;A2IDB1	Q04917	14-3-3 protein eta	YWHAH	6.07586	6.14028	6.10702	3.28152	3.33055	3.30697	10.1651	10.2295	10.1963					21	17	17	65.9	28218	323.31	65236000000	215	246	16
491	6.107	1.28385e+06	Q1	Q16836;A0A0D9SFP2;E9PF18;Q16836-3;Q16836-2;A0A0A0MSE2;A0A1W2PNM1;A0A1W2PQV5;A0A1W2PQC2;A0A1W2PQ78;A0A1W2PRT2	Q16836;A0A0D9SFP2;E9PF18;Q16836-3;Q16836-2;A0A0A0MSE2;A0A1W2PNM1;A0A1W2PQV5;A0A1W2PQC2;A0A1W2PQ78;A0A1W2PRT2	Hydroxyacyl-coenzyme A dehydrogenase, mitochondrial	HADH	6.0518	6.14095	6.12823	3.25746	3.33121	3.32818	10.0831	10.1722	10.1595					20	20	14	45.9	34293	323.31	59335000000	324	314	14
492	6.106	1.28292e+06	Q1	Q86U42-2;Q86U42;B4DEH8;G3V4T2;H0YJH9;A6NDY0-2;A6NDY0;A6NDY0-4	Q86U42-2;Q86U42;B4DEH8;G3V4T2	Polyadenylate-binding protein 2	PABPN1	6.15846	6.1004	6.06008	3.36413	3.29067	3.26003	10.085	10.0269	9.98662					12	12	3	22.6	31496	293.4	40583000000	122	296	11
493	6.106	1.28178e+06	Q1	P43686;P43686-2	P43686;P43686-2	26S protease regulatory subunit 6B	PSMC4	6.07357	6.11599	6.12897	3.27924	3.30626	3.32892	10.3389	10.3813	10.3943					44	44	44	95.2	47366	323.31	91939000000	517	418	24
494	6.104	1.27883e+06	Q1	Q13263;Q13263-2;M0R0K9;M0R3C0;M0R2I3	Q13263;Q13263-2	Transcription intermediary factor 1-beta	TRIM28	6.10112	6.14711	6.06515	3.30679	3.33738	3.26511	10.4846	10.5306	10.4486					43	43	43	75.7	88549	323.31	125160000000	498	835	31.5
495	6.104	1.27574e+06	Q1	Q13177;H7C1X3;E9PM17;B3KNX7;Q13153;Q13153-2;H0YCG5;B1AKS5	Q13177	Serine/threonine-protein kinase PAK 2;PAK-2p27;PAK-2p34	PAK2	6.10083	6.10529	6.10686	3.3065	3.29556	3.30681	10.4009	10.4054	10.407					41	41	31	61.6	58042	323.31	108020000000	331	524	26
496	6.104	1.27375e+06	Q1	Q9Y4L1;A0A087X054;E9PJ21;A0A087WWI4;K7EQK2;Q9Y4L1-2;J3KTF1;J3QL06;Q9BST8;J3QQH7;J3QLE9;A0A087WW13;A0A087X214	Q9Y4L1;A0A087X054;E9PJ21;A0A087WWI4;K7EQK2;Q9Y4L1-2	Hypoxia up-regulated protein 1	HYOU1	6.0761	6.14301	6.09334	3.28177	3.33328	3.2933	10.4991	10.566	10.5163					64	64	64	66.9	111330	323.31	138500000000	611	999	34.5
497	6.103	1.27155e+06	Q1	P31942-2;P31942;P31942-3;P31942-4;P31942-6;P31942-5	P31942-2;P31942;P31942-3;P31942-4	Heterogeneous nuclear ribonucleoprotein H3	HNRNPH3	6.06884	6.048	6.1922	3.27451	3.23827	3.39216	10.0843	10.0635	10.2077					22	20	20	74.6	35238	323.31	63566000000	247	331	13.5
498	6.103	1.27126e+06	Q1	P24539;Q5QNZ2	P24539;Q5QNZ2	ATP synthase F(0) complex subunit B1, mitochondrial	ATP5F1	6.08553	6.07457	6.14885	3.2912	3.26484	3.3488	10.1168	10.1059	10.1801					22	22	22	60.5	28908	323.31	60808000000	256	256	14
499	6.1	1.26897e+06	Q1	P78347-2;P78347-4;P78347-3;P78347;P78347-5;C9J6M0;A0A087WW90;A0A0D9SF80;A0A0A0MSY2;Q86UP8-3;Q6EKJ0;Q86UP8-4;Q86UP8-2;Q6EKJ0-2;Q86UP8-5	P78347-2;P78347-4;P78347-3;P78347	General transcription factor II-I	GTF2I	6.09889	6.11758	6.08278	3.30456	3.30784	3.28274	10.6607	10.6794	10.6446					82	82	77	69.5	107970	323.31	172440000000	746	957	47.5
500	6.099	1.25887e+06	Q1	P62495;B7Z7P8;P62495-2;I3L492;D6RJE8;D6RCB3	P62495;B7Z7P8;P62495-2	Eukaryotic peptide chain release factor subunit 1	ETF1	6.0473	6.06756	6.18285	3.25297	3.25783	3.3828	10.3127	10.3329	10.4482					33	33	33	79.9	49030	323.31	88515000000	354	437	24
501	6.098	1.25358e+06	Q1	P04899;P04899-4;P04899-6;P04899-3;P04899-5;P04899-2;P63096-2;P09471-2;P11488;P19087;A8MTJ3;P09471;A0A1W2PRE1;A2A2R6;A0A1W2PQK2;A0A087WTB6;A0A1W2PRJ7;A0A087WZE5;F8WE78;C9JPP4;A0A1W2PS82;H3BTM2;A0A1W2PP38	P04899;P04899-4;P04899-6;P04899-3;P04899-5;P04899-2	Guanine nucleotide-binding protein G(i) subunit alpha-2	GNAI2	6.07317	6.10108	6.11899	3.27883	3.29135	3.31894	10.1758	10.2037	10.2216					26	26	17	44.5	40450	323.31	62146000000	264	355	16.5
502	6.097	1.2511e+06	Q1	P62191;P62191-2;G3V4X1	P62191;P62191-2	26S protease regulatory subunit 4	PSMC1	6.09584	6.12044	6.07366	3.30151	3.31071	3.27362	10.3427	10.3673	10.3205					42	42	42	84.1	49184	323.31	90673000000	460	440	23
503	6.096	1.25046e+06	Q1	Q5JRI1;O75494-5;O75494-4;O75494-6;O75494-3;O75494-2;O75494;Q6IQ42;Q8WXF0;R4GMP8	Q5JRI1;O75494-5;O75494-4;O75494-6;O75494-3;O75494-2;O75494	Serine/arginine-rich splicing factor 10	SRSF10	6.06243	6.09851	6.12843	3.2681	3.28877	3.32838	9.90182	9.9379	9.96782					18	18	18	65.1	20913	211.76	31878000000	113	172	9
504	6.096	1.24993e+06	Q1	P28070	P28070	Proteasome subunit beta type-4	PSMB4	6.06183	6.12607	6.10036	3.2675	3.31634	3.30031	9.98838	10.0526	10.0269					13	13	13	64	29204	252.98	47789000000	171	264	11
505	6.095	1.2473e+06	Q1	Q9Y383;V9GZ75;F8WEU3	Q9Y383	Putative RNA-binding protein Luc7-like 2	LUC7L2	6.088	6.07635	6.12015	3.29367	3.26662	3.3201	10.2284	10.2168	10.2606					31	31	2	4.3	46513	323.31	74484000000	300	392	18
506	6.094	1.24518e+06	Q1	P35998;A0A1W2PQS1;P35998-2;C9JLS9	P35998;A0A1W2PQS1;P35998-2	26S protease regulatory subunit 7	PSMC2	6.082	6.09436	6.10674	3.28767	3.28463	3.30669	10.3821	10.3945	10.4069					44	44	44	84.5	48633	323.31	101390000000	402	433	26
507	6.093	1.24304e+06	Q1	Q9UBQ5;Q9UBQ5-2;K7ERF1;K7ES31;A0A087WVB9;K7EQM4	Q9UBQ5;Q9UBQ5-2;K7ERF1;K7ES31;A0A087WVB9;K7EQM4	Eukaryotic translation initiation factor 3 subunit K	EIF3K	6.0307	6.10219	6.14717	3.23636	3.29245	3.34713	9.84526	9.91675	9.96174					11	11	7	38.5	25059	264.28	30048000000	147	218	8.5
508	6.093	1.24127e+06	Q1	P34932;A0A087WYC1;A0A087WTS8;P34932-2	P34932;A0A087WYC1;A0A087WTS8	Heat shock 70 kDa protein 4	HSPA4	6.07393	6.10268	6.10306	3.2796	3.29295	3.30302	10.6025	10.6313	10.6317					82	82	78	80.7	94330	323.31	177450000000	792	840	44
509	6.092	1.24005e+06	Q1	P62993;P62993-2;J3KT38;J3QRL5;J3QLF6	P62993;P62993-2	Growth factor receptor-bound protein 2	GRB2	6.04775	6.13414	6.09542	3.25341	3.32441	3.29537	10.0121	10.0985	10.0597					21	21	21	77.9	25206	248.19	46501000000	186	217	12
510	6.091	1.23689e+06	Q1	P63208;E5RJR5;E7ERH2;F8W8N3;P63208-2;E5RGM3;E5RHM3;E5RGM4	P63208;E5RJR5;E7ERH2;F8W8N3;P63208-2	S-phase kinase-associated protein 1	SKP1	6.06845	6.11294	6.09228	3.27412	3.30321	3.29223	9.90784	9.95234	9.93167					18	18	15	64.4	18658	323.31	36074000000	211	163	9
511	6.09	1.23482e+06	Q1	P54727;P54727-2;Q5W0S5;H0Y579;Q5W0S4	P54727;P54727-2	UV excision repair protein RAD23 homolog B	RAD23B	6.02008	6.1151	6.13351	3.22574	3.30537	3.33346	9.92641	10.0214	10.0398					20	20	17	47.9	43171	320.14	40917000000	216	409	10.5
512	6.087	1227999	Q1	P35249;C9JZI1;P35249-2;C9J8M3;C9JTT7;C9JXZ7;C9JGY5;F8WE44;H7C1P0;C9JW34	P35249;C9JZI1;P35249-2;C9J8M3;C9JTT7	Replication factor C subunit 4	RFC4	6.07431	6.0451	6.14238	3.27998	3.23536	3.34233	10.1636	10.1344	10.2317					27	27	27	76	39681	323.31	53273000000	182	363	16
513	6.086	1.22343e+06	Q1	O00231;O00231-2;J3QRY4;J3QS13;J3KSW3	O00231;O00231-2	26S proteasome non-ATPase regulatory subunit 11	PSMD11	6.09166	6.08861	6.07841	3.29732	3.27888	3.27836	10.4082	10.4051	10.3949					32	32	32	73.9	47463	323.31	100840000000	267	422	27
514	6.086	1.22117e+06	Q1	Q16851;A0A087WYS1;E7EUC7;C9JQU9;C9J6Q0	Q16851;A0A087WYS1;E7EUC7	UTP--glucose-1-phosphate uridylyltransferase	UGP2	6.10008	6.0838	6.07427	3.30575	3.27407	3.27422	10.4324	10.4161	10.4066					42	42	4	6.1	56940	323.31	104710000000	443	508	28
515	6.086	1.21992e+06	Q1	Q9BUL8;C9J5C3;C9J6F3;C9J363;C9JND6;C9JSA3;H7C5M9;C9J932;F8WDF3	Q9BUL8;C9J5C3;C9J6F3;C9J363;C9JND6;C9JSA3;H7C5M9	Programmed cell death protein 10	PDCD10	6.09406	6.03745	6.12659	3.29972	3.22772	3.32654	9.97921	9.9226	10.0117					15	15	15	70.3	24701	323.31	39694000000	149	212	10
516	6.083	1.21973e+06	Q1	P0DN76;Q01081;Q01081-2;Q01081-4;Q8WU68-3;Q8WU68;A0A1B0GW87;M0QYK5;M0R2N4;Q01081-3;Q8WU68-2;K7EJH3;K7EJM7	P0DN76;Q01081;Q01081-2;Q01081-4	Splicing factor U2AF 35 kDa subunit	U2AF1	6.1292	6.10857	6.01253	3.33487	3.29883	3.21248	10.0144	9.99372	9.89768					13	13	13	60.8	27872	323.31	36897000000	150	240	10
517	6.081	1.2195e+06	Q1	Q15046;Q15046-2;H3BVA8;J3KRL2;H3BPV7;H3BRC9	Q15046;Q15046-2	Lysine--tRNA ligase	KARS	6.07086	6.09113	6.08204	3.27653	3.2814	3.282	10.4403	10.4606	10.4515					53	53	53	85.6	68047	323.31	123400000000	490	597	30.5
518	6.08	1.2106e+06	Q1	O15212;A2AB88	O15212;A2AB88	Prefoldin subunit 6	PFDN6	6.1259	5.97178	6.14306	3.33157	3.16205	3.34301	9.91414	9.76002	9.9313					13	13	13	69	14582	323.31	26732000000	86	129	8
519	6.079	1.20742e+06	Q1	P54687-4;P54687;P54687-5;P54687-3;P54687-2;F5H2F2;A0A087WYF2	P54687-4;P54687;P54687-5;P54687-3;P54687-2	Branched-chain-amino-acid aminotransferase, cytosolic	BCAT1	6.02488	6.12844	6.08403	3.23055	3.3187	3.28399	10.1653	10.2689	10.2244					22	22	22	48.8	42837	323.31	74336000000	228	385	18
520	6.077	1.20622e+06	Q1	Q9UHD1;Q9UHD1-2;E9PHZ2	Q9UHD1;Q9UHD1-2	Cysteine and histidine-rich domain-containing protein 1	CHORDC1	5.99798	6.17379	6.05857	3.20365	3.36406	3.25852	10.0735	10.2493	10.1341					27	27	13	37.3	37489	323.31	57515000000	264	332	15.5
521	6.076	1.20552e+06	Q1	P51665;H3BNT7;H3BTM8;H3BQV2	P51665;H3BNT7;H3BTM8	26S proteasome non-ATPase regulatory subunit 7	PSMD7	6.10499	6.14626	5.97698	3.31065	3.33653	3.17693	10.0315	10.0728	9.90352					17	17	17	73.1	37025	322.35	36458000000	190	324	11
522	6.076	1.1924e+06	Q1	P46940;A0A0J9YXZ5;H0YLE8;A0A087X225;A0A087WWP1;H0YKA5	P46940;A0A0J9YXZ5;H0YLE8	Ras GTPase-activating-like protein IQGAP1	IQGAP1	6.10173	6.04277	6.0827	3.3074	3.23304	3.28265	10.7722	10.7133	10.7532					129	129	124	76.3	189250	323.31	226100000000	1042	1657	61
523	6.072	1.19171e+06	Q1	Q8IUE6	Q8IUE6	Histone H2A type 2-B	HIST2H2AB	6.11289	6.05798	6.04388	3.31856	3.24824	3.24383	9.69701	9.6421	9.628	+				6	3	2	10.8	13995	58.448	16464000000	33	130	5
524	6.067	1.182e+06	Q1	P33993;P33993-3;P33993-2;C9J8M6	P33993;P33993-3	DNA replication licensing factor MCM7	MCM7	6.06206	6.07349	6.06695	3.26772	3.26376	3.2669	10.485	10.4965	10.4899					59	59	59	74.8	81307	323.31	114670000000	546	719	34.5
525	6.067	1.17331e+06	Q1	A0A087X2I1;P62333;H0YJC0;H0YJS8;H0YJX2;H0YJT1;H0YJE9	A0A087X2I1;P62333	26S protease regulatory subunit 10B	PSMC6	6.12289	6.04969	6.02936	3.32856	3.23996	3.22932	10.3505	10.2773	10.2569					30	30	30	70.7	45796	323.31	81044000000	330	403	22
526	6.067	1.17274e+06	Q1	Q9Y4Y9;Q9Y4Y9-2;B8ZZF8	Q9Y4Y9;Q9Y4Y9-2	U6 snRNA-associated Sm-like protein LSm5	LSM5	6.083	6.11528	6.00231	3.28866	3.30555	3.20226	9.36609	9.39837	9.2854					5	5	5	60.4	9937.4	41.438	8390500000	69	91	2.5
527	6.066	1.16821e+06	Q1	Q14697;F5H6X6	Q14697;F5H6X6	Neutral alpha-glucosidase AB	GANAB	6.03276	6.11238	6.05243	3.23843	3.30265	3.25238	10.52	10.5996	10.5396					67	67	2	3.4	106870	323.31	151300000000	632	944	40
528	6.065	1.16733e+06	Q1	O76003	O76003	Glutaredoxin-3	GLRX3	6.07217	6.04724	6.07421	3.27783	3.23751	3.27416	10.2126	10.1877	10.2146					28	28	28	83	37432	323.31	58663000000	270	335	18
529	6.065	1.16182e+06	Q1	Q969Q0	Q969Q0	60S ribosomal protein L36a-like	RPL36AL	6.20228	5.97665	6.01462	3.40795	3.16692	3.21457	9.6895	9.46386	9.50183					10	10	4	10.4	12469	170.2	17466000000	65	106	4
530	6.064	1.16067e+06	Q1	Q15843	Q15843	NEDD8	NEDD8	6.01244	6.09272	6.08578	3.21811	3.28299	3.28574	9.37471	9.455	9.44806					4	4	1	17.3	9071.4	55.252	13493000000	115	81	3
531	6.063	1.16031e+06	Q1	P19623;K7EKM4;K7ESL0;K7EQ47;K7EL89	P19623	Spermidine synthase	SRM	6.07513	6.00735	6.10551	3.2808	3.19762	3.30547	10.1364	10.0686	10.1668					24	24	24	96.4	33824	323.31	58064000000	212	302	15
532	6.063	1.1576e+06	Q1	P49915;P49915-2	P49915;P49915-2	GMP synthase [glutamine-hydrolyzing]	GMPS	6.03652	6.07149	6.07957	3.24218	3.26176	3.27952	10.5183	10.5532	10.5613					59	59	59	84.7	76715	323.31	155910000000	615	693	39.5
533	6.062	1.15591e+06	Q1	Q9GZT3-2;Q9GZT3;A0A087WUN7;H0YJ40;G3V4X6;G3V2S9;H0YJW7;H0YJ07;H0YJU7;H0YJI1	Q9GZT3-2;Q9GZT3;A0A087WUN7;H0YJ40;G3V4X6;G3V2S9;H0YJW7	SRA stem-loop-interacting RNA-binding protein, mitochondrial	SLIRP	6.08088	6.04497	6.05873	3.28655	3.23524	3.25869	9.81113	9.77522	9.78898					13	13	13	73.8	12122	207.16	23849000000	97	107	7
534	6.061	1.15519e+06	Q1	Q9Y277;Q9Y277-2;E5RJN6;E5RHZ6;E5RFP6;E5RHE1;E5RK27;E5RFL1	Q9Y277;Q9Y277-2;E5RJN6;E5RHZ6;E5RFP6	Voltage-dependent anion-selective channel protein 3	VDAC3	6.0301	6.11259	6.04056	3.23576	3.30285	3.24051	9.81834	9.90083	9.82879					12	12	12	56.2	30658	323.31	26641000000	86	283	8
535	6.059	1.15287e+06	Q1	Q9BQA1;Q9BQA1-2;H0Y711	Q9BQA1;Q9BQA1-2;H0Y711	Methylosome protein 50	WDR77	6.03319	6.14705	5.99582	3.23886	3.33731	3.19577	9.82143	9.93529	9.78406					18	18	18	81.6	36724	323.31	27392000000	126	342	8
536	6.058	1.149e+06	Q1	P52292;J3QLL0;J3KS65;J3QL07	P52292	Importin subunit alpha-1	KPNA2	6.00669	6.11116	6.05681	3.21236	3.30143	3.25676	10.1929	10.2973	10.243					32	32	32	73.5	57861	323.31	70296000000	278	529	20
537	6.057	1.14431e+06	Q1	P22695;H3BRG4;H3BSJ9;H3BP04;H3BUE4;H3BUI9;A0A087WVZ4	P22695;H3BRG4;H3BSJ9	Cytochrome b-c1 complex subunit 2, mitochondrial	UQCRC2	6.00703	6.10167	6.06177	3.2127	3.29194	3.26172	10.1709	10.2656	10.2257					26	26	26	75.1	48442	323.31	67262000000	293	453	19
538	6.053	1.13114e+06	Q1	P17980;E9PM69;E9PKD5;E9PMD8	P17980;E9PM69;E9PKD5;E9PMD8	26S protease regulatory subunit 6A	PSMC3	6.04793	6.05357	6.05898	3.2536	3.24384	3.25894	10.2853	10.2909	10.2963					34	34	2	3.6	49203	323.31	86603000000	431	439	22.5
539	6.051	1.12586e+06	Q1	P15170-2;P15170-3;P15170;H3BR35;H3BSV8	P15170-2;P15170-3;P15170;H3BR35	Eukaryotic peptide chain release factor GTP-binding subunit ERF3A	GSPT1	6.0252	6.06374	6.06436	3.23087	3.25401	3.26432	10.3497	10.3882	10.3888					41	41	19	31.4	68600	323.31	91992000000	439	636	27.5
540	6.048	1.12069e+06	Q1	P35244;B5MC59	P35244;B5MC59	Replication protein A 14 kDa subunit	RPA3	6.05718	6.00985	6.07793	3.26285	3.20011	3.27789	9.75524	9.70791	9.776					12	12	12	90.1	13569	264.05	23381000000	143	121	6.5
541	6.047	1.12007e+06	Q1	P28074;P28074-3;P28074-2;H0YJM8;G8JLC2;G3V3K3	P28074;P28074-3;P28074-2	Proteasome subunit beta type-5	PSMB5	6.07756	6.08112	5.9828	3.28323	3.27139	3.18275	10.0041	10.0077	9.90934					22	22	22	92	28480	323.31	39049000000	203	263	11
542	6.046	1.11509e+06	Q1	O15511;B1ALC0;O15511-2	O15511;B1ALC0;O15511-2	Actin-related protein 2/3 complex subunit 5	ARPC5	6.02152	6.01991	6.09607	3.22719	3.21017	3.29602	9.90667	9.90506	9.98122					13	12	12	64.2	16320	323.31	34397000000	95	151	10
543	6.046	1.11494e+06	Q1	F8VRH0	F8VRH0		PCBP2	6.03829	6.08184	6.0169	3.24396	3.27211	3.21686	9.96483	10.0084	9.94345					11	11	3	18.4	32035	323.31	41427000000	119	310	11
544	6.045	1.11308e+06	Q1	B3KS98;O15372;A0A087WZK9;E5RGU4;E5RFH0;E5RFW7;E5RHC7;E5RH59;REV__Q2WGJ6	B3KS98;O15372;A0A087WZK9	Eukaryotic translation initiation factor 3 subunit H	EIF3H	6.0142	6.09501	6.02462	3.21987	3.28528	3.22457	10.2004	10.2812	10.2108					24	24	8	25.7	41581	323.31	73205000000	278	366	20
545	6.044	1.11204e+06	Q1	P62877	P62877	E3 ubiquitin-protein ligase RBX1;E3 ubiquitin-protein ligase RBX1, N-terminally processed	RBX1	5.99593	6.11831	6.01745	3.2016	3.30858	3.2174	9.3582	9.48058	9.37972					5	5	5	32.4	12274	181.66	9057600000	62	108	3
546	6.043	1.1107e+06	Q1	Q9BWJ5	Q9BWJ5	Splicing factor 3B subunit 5	SF3B5	6.03672	6.07	6.02126	3.24239	3.26026	3.22121	9.62084	9.65412	9.60538					8	8	8	96.5	10135	323.31	16991000000	81	86	5
547	6.041	1.10589e+06	Q1	O75937;S4R3J5	O75937	DnaJ homolog subfamily C member 8	DNAJC8	6.00229	6.03473	6.08559	3.20796	3.225	3.28554	10.0014	10.0338	10.0847					22	22	22	65.2	29841	270.64	42556000000	178	253	13
548	6.041	1.10443e+06	Q1	Q15631;E9PGT1;H7C1D4;Q15631-2;A0A0J9YVW2	Q15631;E9PGT1;H7C1D4;Q15631-2	Translin	TSN	5.95436	6.11485	6.05274	3.16003	3.30512	3.2527	9.91869	10.0792	10.0171					17	17	17	73.7	26183	323.31	41492000000	121	228	12
549	6.04	1.10213e+06	Q1	P35659;B4DFG0;P35659-2;D6RDA2;H0Y993;D6R9L5;H0Y8X0	P35659;B4DFG0;P35659-2	Protein DEK	DEK	5.96501	6.05471	6.10065	3.17068	3.24498	3.30061	10.1289	10.2186	10.2646					21	21	21	43.5	42674	299.73	63910000000	179	375	19
550	6.039	1.09881e+06	Q1	P01591;D6RD17;D6RHJ6;C9JA05	P01591;D6RD17;D6RHJ6	Immunoglobulin J chain	IGJ;JCHAIN	6.00896	6.09996	6.00723	3.21462	3.29022	3.20718	9.7972	9.8882	9.79547					9	9	9	65.4	18098	78.248	28184000000	78	159	8
551	6.038	1.09549e+06	Q1	A0A1W2PPH1;P23368;A0A1W2PQT3;A0A1W2PQH3;A0A1W2PQY8;A0A1W2PR68;A0A1W2PQF8;P23368-2;A0A1W2PQ37;A0A1W2PRS2;A0A1W2PRY9;A0A1W2PQH4;A0A1W2PRH1;A0A1W2PPY2;Q6TCH8;E9PMB9;Q16798-2;Q16798	A0A1W2PPH1;P23368;A0A1W2PQT3;A0A1W2PQH3;A0A1W2PQY8;A0A1W2PR68;A0A1W2PQF8;P23368-2;A0A1W2PQ37	NAD-dependent malic enzyme, mitochondrial	ME2	5.99867	6.06237	6.05206	3.20433	3.25264	3.25201	10.3462	10.4099	10.3996					42	42	41	86.4	61221	323.31	100800000000	492	546	29
552	6.036	1.0929e+06	Q1	P68402;J3KNE3;P68402-3;P68402-2;P68402-4	P68402;J3KNE3;P68402-3;P68402-2;P68402-4	Platelet-activating factor acetylhydrolase IB subunit beta	PAFAH1B2	6.0405	6.09939	5.96921	3.24617	3.28966	3.16916	9.70381	9.76269	9.63251					10	10	10	82.5	25569	323.31	23026000000	129	229	6
553	6.036	1.08578e+06	Q1	D6RGI3;D6RER5;Q9NVA2;Q9NVA2-2;D6RDU5;H0Y961;D6RDP1;D6R9Y6;H0Y9G8;E7EW69;E7EX04;B5ME97;Q9P0V9-3;Q9P0V9;Q9P0V9-2	D6RGI3;D6RER5;Q9NVA2;Q9NVA2-2;D6RDU5	Septin-11	2017-09-11	6.04139	6.03186	6.03393	3.24706	3.22212	3.23388	10.2488	10.2392	10.2413					35	35	18	44.2	49005	323.31	75370000000	276	425	21
554	6.035	1.08525e+06	Q1	P42704;A0A0C4DG06;B8ZZ38;C9JCA9;H7C3W8	P42704	Leucine-rich PPR motif-containing protein, mitochondrial	LRPPRC	6.03819	6.02785	6.0376	3.24385	3.21812	3.23756	10.8776	10.8672	10.877					124	124	123	81.5	157900	323.31	297540000000	1198	1394	90
555	6.035	1.08372e+06	Q1	Q04760;Q04760-2	Q04760;Q04760-2	Lactoylglutathione lyase	GLO1	6.05613	6.03755	6.00984	3.26179	3.22781	3.20979	9.98267	9.96409	9.93638					13	13	13	84.8	20777	154.79	36366000000	104	184	11
556	6.034	1.08286e+06	Q1	Q9NSD9;Q9NSD9-2	Q9NSD9;Q9NSD9-2	Phenylalanine--tRNA ligase beta subunit	FARSB	6.04917	5.97997	6.07223	3.25484	3.17024	3.27218	10.4257	10.3565	10.4487					46	46	46	72	66115	323.31	97547000000	427	589	31
557	6.034	1.08084e+06	Q1	P41252;A0A0A0MSX9;J3KR24;Q5TCD1;Q5TCC6;Q5TCC9	P41252;A0A0A0MSX9;J3KR24	Isoleucine--tRNA ligase, cytoplasmic	IARS	6.02576	6.04287	6.03249	3.23143	3.23313	3.23244	10.6668	10.6839	10.6735					86	86	86	74.2	144500	323.31	185510000000	755	1262	57
558	6.029	1.07327e+06	Q1	O00244;E5RIM7;E5RGN3	O00244;E5RIM7;E5RGN3	Copper transport protein ATOX1	ATOX1	6.04811	6.02849	6.00935	3.25378	3.21876	3.2093	9.53532	9.5157	9.49656					11	11	11	88.2	7401.6	323.31	13005000000	97	68	4
559	6.027	1.0689e+06	Q1	P60228;E5RGA2;H0YBR5;E5RHS5;H0YAW4;E5RIT4;E5RII3;E5RIP5;E5RJ25;H0YBP5	P60228;E5RGA2	Eukaryotic translation initiation factor 3 subunit E	EIF3E	6.02191	6.06639	5.99238	3.22758	3.25665	3.19234	10.2962	10.3407	10.2667					35	35	35	77.5	52220	323.31	82439000000	374	445	24.5
560	6.027	1.06651e+06	Q1	P10606	P10606	Cytochrome c oxidase subunit 5B, mitochondrial	COX5B	6.06154	6.07665	5.94178	3.26721	3.26692	3.14174	9.84978	9.86489	9.73002					12	12	12	66.7	13696	69.507	24411000000	54	129	8
561	6.026	1.0649e+06	Q1	P49588;H3BPK7	P49588	Alanine--tRNA ligase, cytoplasmic	AARS	6.0183	6.06546	5.99518	3.22397	3.25573	3.19514	10.611	10.6582	10.5879					69	69	2	2	106810	323.31	177960000000	672	968	51
562	6.022	1.06385e+06	Q1	A0A1W2PQ51;Q92841-3;A0A0U1RQJ0	A0A1W2PQ51;Q92841-3	Probable ATP-dependent RNA helicase DDX17	DDX17	5.97988	6.05827	6.02689	3.18554	3.24854	3.22685	10.4029	10.4812	10.4499					58	44	1	2.2	80457	323.31	103800000000	364	731	34.5
563	6.02	1.05407e+06	Q1	Q96C36;A0A087WTV6;A0A087WZR9;J3KR12;A0A087WX69;A0A087WZF0	Q96C36;A0A087WTV6;A0A087WZR9;J3KR12	Pyrroline-5-carboxylate reductase 2;Pyrroline-5-carboxylate reductase	PYCR2	5.97776	6.01825	6.0654	3.18343	3.20851	3.26535	10.067	10.1075	10.1547					23	23	22	63.4	33637	323.31	52370000000	276	320	16
564	6.02	1.05183e+06	Q1	Q16555;A0A1C7CYX9;Q16555-2;Q14195;E5RFU4;Q14195-2;H0YBT4;E9PD68;Q14194;Q14194-2;D6RF19	Q16555;A0A1C7CYX9;Q16555-2	Dihydropyrimidinase-related protein 2	DPYSL2	6.04361	6.01354	6.00212	3.24928	3.20381	3.20208	10.4201	10.3901	10.3786					36	36	36	77.3	62293	323.31	100110000000	404	572	31
565	6.019	1.0474e+06	Q1	O75367-3;O75367;B4DJC3;D6RCF2;Q9P0M6;Q5SQT3	O75367-3;O75367;B4DJC3	Core histone macro-H2A.1;Histone H2A	H2AFY	6.04518	5.98833	6.02488	3.25084	3.1786	3.22483	10.1856	10.1288	10.1653	+				25	25	3	10.5	39488	323.31	61770000000	229	371	18
566	6.019	1.04736e+06	Q1	Q13907;Q13907-2;C9JKM8;C9JD53;Q9BXS1	Q13907;Q13907-2	Isopentenyl-diphosphate Delta-isomerase 1	IDI1	6.01214	6.01643	6.02858	3.21781	3.2067	3.22854	10.0112	10.0155	10.0277					14	14	14	67.4	26319	305.8	37603000000	140	227	13
567	6.018	1044979	Q1	P52209-2;P52209;K7EM49;K7EPF6;K7EMN2;K7ELN9	P52209-2;P52209	6-phosphogluconate dehydrogenase, decarboxylating	PGD	5.99817	6.06354	5.99191	3.20384	3.25381	3.19187	10.2725	10.3379	10.2662					32	32	32	73.6	51872	323.31	78784000000	278	470	24.5
568	6.018	1.04497e+06	Q1	Q16718;A0A087X1G1;H7BYD0;Q16718-2;F8WAS3;A0A087WXR5;C9IZN5	Q16718;A0A087X1G1;H7BYD0;Q16718-2;F8WAS3;A0A087WXR5	NADH dehydrogenase [ubiquinone] 1 alpha subcomplex subunit 5	NDUFA5	5.99076	6.01764	6.04477	3.19643	3.2079	3.24472	9.52912	9.556	9.58313					8	8	8	69.8	13459	251.58	13606000000	77	116	4.5
569	6.017	1.04299e+06	Q1	Q9Y262;B0QY89;Q9Y262-2;B0QY90;C9JHP4;C9K0Q7;H7C3A0;H0Y7E6	Q9Y262;B0QY89;Q9Y262-2;B0QY90	Eukaryotic translation initiation factor 3 subunit L	EIF3L	6.06362	5.99867	5.98853	3.26928	3.18893	3.18849	10.4112	10.3462	10.3361					35	35	35	66.3	66726	323.31	91751000000	273	564	29
570	6.014	1.04288e+06	Q1	P60981;P60981-2;F6RFD5	P60981;P60981-2;F6RFD5	Destrin	DSTN	6.00233	5.98491	6.05617	3.208	3.17517	3.25612	9.88748	9.87006	9.94132					22	21	21	82.4	18506	323.31	31046000000	143	165	10
571	6.014	1.03645e+06	Q1	Q96PK6;Q96PK6-2;A0A0A6YYI9;F8WDX3;A0A0A0MSL8;B8ZZ74;Q96PK6-3;Q96PK6-4	Q96PK6	RNA-binding protein 14	RBM14	5.9726	6.06392	6.00515	3.17827	3.25419	3.2051	10.2195	10.3108	10.252					43	43	34	44.4	69491	323.31	75169000000	273	669	23
572	6.012	1.03643e+06	Q1	Q9Y5V0;H0YC70;E5RHV4;H0YAP1;E5RHR6	Q9Y5V0;H0YC70;E5RHV4;H0YAP1;E5RHR6	Zinc finger protein 706	ZNF706	5.88522	5.98903	6.16099	3.09089	3.1793	3.36095	8.77037	8.87418	9.04614					2	2	2	30.3	8497.7	6.9858	3307700000	14	76	1
573	6.01	1.03289e+06	Q1	P28907;H0Y950;P28907-2	P28907	ADP-ribosyl cyclase/cyclic ADP-ribose hydrolase 1	CD38	5.9738	6.06815	5.989	3.17946	3.25842	3.18895	10.1377	10.2321	10.1529					19	19	19	53	34328	323.31	56074000000	171	300	19
574	6.008	1.02878e+06	Q1	C9J6N5;C9JQ40;C9JW51;A0A1C7CYX8;Q9H098;Q9H098-2;C9J3Q3;X6RET8;C9JP05;C9JYP1;C9J6Y8;F8WCJ2	C9J6N5;C9JQ40;C9JW51;A0A1C7CYX8;Q9H098;Q9H098-2;C9J3Q3;X6RET8;C9JP05	Protein FAM107B	FAM107B	5.95757	5.95729	6.10904	3.16323	3.14756	3.30899	9.68782	9.68754	9.83929					13	13	13	69.4	14844	323.31	24693000000	131	124	7
575	6.007	1.02085e+06	Q1	Q9Y224;G3V4C6;H0YJB9;G3V4E7	Q9Y224;G3V4C6	UPF0568 protein C14orf166	C14orf166	6.03049	6.03716	5.95448	3.23615	3.22743	3.15443	10.077	10.0837	10.001					23	23	23	81.1	28068	323.31	45163000000	186	244	14.5
576	6.006	1.01983e+06	Q1	O75995	O75995	SAM and SH3 domain-containing protein 3	SASH3	5.94948	6.01454	6.0551	3.15514	3.20481	3.25505	9.94857	10.0136	10.0542					19	19	19	77.6	41595	323.31	36926000000	185	380	13
577	6.006	1.01971e+06	Q1	B8ZZN6;P63165;B8ZZJ0;B9A032;B8ZZ67;P63165-2	B8ZZN6;P63165;B8ZZJ0;B9A032	Small ubiquitin-related modifier 1	SUMO1	5.98143	6.0082	6.02857	3.18709	3.19847	3.22852	9.60694	9.63371	9.65408					7	7	7	39	16645	137.34	16602000000	39	146	5.5
578	6.004	1.01682e+06	Q1	Q14739;C9JXK0;C9JES9	Q14739;C9JXK0	Lamin-B receptor	LBR	5.92251	6.04618	6.04206	3.12818	3.23645	3.24201	10.0118	10.1355	10.1313					25	25	25	31.7	70702	276.07	53224000000	150	615	16
579	6.003	1.01506e+06	Q1	P61221;D6R9I9;D6RGF4;H0Y990	P61221;D6R9I9	ATP-binding cassette sub-family E member 1	ABCE1	6.00291	6.00216	6.00429	3.20858	3.19243	3.20425	10.2946	10.2939	10.296					44	44	44	66.9	67314	323.31	78738000000	368	599	25.5
580	6.003	1.01339e+06	Q1	P50995-2;P50995;H0Y6E1	P50995-2;P50995	Annexin A11	ANXA11	5.9941	5.91996	6.09375	3.19976	3.11022	3.2937	10.158	10.0839	10.2576					27	27	27	50.6	51242	323.31	57751000000	246	472	19
581	6.003	1.00769e+06	Q1	B4DUT8;Q99439;B4DDF4;Q99439-2;A0A087X1X5;A0A087X271;H3BVI6;K7ES69;H3BQH0;U3KPS3;Q15417-3;Q15417;A0A087WV51;K7EQ72;E9PDU6;Q15417-2	B4DUT8;Q99439;B4DDF4;Q99439-2;A0A087X1X5;A0A087X271;H3BVI6	Calponin;Calponin-2	CNN2	6.00433	6.06631	5.93712	3.21	3.25658	3.13707	9.96866	10.0306	9.90145					18	18	17	74.2	35943	323.31	41038000000	164	330	12
582	6.002	1.00721e+06	Q1	K7EKE6;P36776-2;P36776;K7EJE8;P36776-3;K7ER27;K7ERR6;K7EQF8;K7ER56	K7EKE6;P36776-2;P36776;K7EJE8;P36776-3	Lon protease homolog, mitochondrial	LONP1	6.02069	6.00586	5.97985	3.22636	3.19613	3.17981	10.4621	10.4473	10.4213					58	58	58	77.9	95179	323.31	113520000000	515	845	36
583	6.002	1.00568e+06	Q1	Q9NPE3;H0YM60	Q9NPE3	H/ACA ribonucleoprotein complex subunit 3	NOP10	5.96417	5.9891	6.05195	3.16983	3.17937	3.2519	9.32644	9.35137	9.41422					5	5	5	70.3	7705.9	191.45	10651000000	45	64	3
584	6	1.00393e+06	Q1	O00170;E9PMH2;V9GYQ3	O00170;E9PMH2	AH receptor-interacting protein	AIP	5.97214	5.97778	6.05069	3.17781	3.16804	3.25065	10.0334	10.039	10.1119					26	26	26	76.1	37636	323.31	43627000000	228	330	15
585	5.999	1.00075e+06	Q1	P30040;F8VY02;F8W1G0;P30040-2	P30040;F8VY02	Endoplasmic reticulum resident protein 29	ERP29	6.00419	6.01287	5.98112	3.20985	3.20313	3.18107	9.93073	9.93941	9.90766					16	16	16	62.8	28993	269.59	34255000000	186	261	11
586	5.999	1.00067e+06	Q1	Q08945;E9PMD4;A0A0U1RRK2;E9PPZ7	Q08945	FACT complex subunit SSRP1	SSRP1	6.008	6.0194	5.97019	3.21367	3.20967	3.17014	10.3703	10.3817	10.3325					47	47	47	59.4	81074	323.31	90275000000	344	709	30
587	5.998	999501	Q1	Q9NZI8;Q9NZI8-2	Q9NZI8;Q9NZI8-2	Insulin-like growth factor 2 mRNA-binding protein 1	IGF2BP1	5.98851	5.99698	6.0085	3.19417	3.18725	3.20846	10.2886	10.2971	10.3086					37	37	35	51.1	63480	323.31	71704000000	275	577	26
588	5.998	999314	Q1	Q9Y2Z0	Q9Y2Z0	Suppressor of G2 allele of SKP1 homolog	SUGT1	5.93166	6.04031	6.02144	3.13733	3.23058	3.22139	10.139	10.2477	10.2288					31	31	3	16.2	41024	323.31	61010000000	231	365	21
589	5.997	999073	Q1	Q9BRT6	Q9BRT6	Protein LLP homolog	LLPH	5.98191	5.95101	6.05918	3.18757	3.14127	3.25914	9.34418	9.31328	9.42145					7	7	7	44.2	15225	123.04	10487000000	49	129	3
590	5.997	995670	Q1	P05091;P05091-2;F8VP50;S4R3S4;H0YMG7;O94788-4;O94788-2;O94788-3;O94788;H0YKL3	P05091;P05091-2	Aldehyde dehydrogenase, mitochondrial	ALDH2	5.95839	6.02642	6.00674	3.16406	3.21669	3.2067	10.186	10.254	10.2343					37	37	34	77.4	56381	323.31	68504000000	315	517	22
591	5.997	995576	Q1	C9JXB8;C9JNW5;P83731	C9JXB8;C9JNW5;P83731	60S ribosomal protein L24	RPL24	6.07154	5.95967	5.95982	3.27721	3.14994	3.15977	9.85978	9.74791	9.74806					8	8	8	47.9	14369	19.313	24584000000	41	121	8
592	5.996	991893	Q1	P53618;E9PP73;E9PP63;E9PKQ1	P53618;E9PP73	Coatomer subunit beta	COPB1	5.99392	6.00654	5.98874	3.19959	3.19681	3.18869	10.4531	10.4657	10.4479					66	66	66	69.7	107140	323.31	121300000000	541	953	37.5
593	5.995	991398	Q1	E7EU96;P68400;Q8NEV1;P68400-2;A0A087WY74;V9GYA2;V9GY80;V9GYW6	E7EU96;P68400;Q8NEV1;P68400-2	Casein kinase II subunit alpha;Casein kinase II subunit alpha 3	CSNK2A1;CSNK2A3	5.96488	6.01291	6.00765	3.17055	3.20318	3.2076	10.1288	10.1768	10.1715					24	24	24	61	45310	323.31	51305000000	215	385	19
594	5.994	990742	Q1	Q969H8;M0QXF7;M0QYN0	Q969H8;M0QXF7;M0QYN0	Myeloid-derived growth factor	MYDGF	5.94332	5.99168	6.04748	3.14899	3.18194	3.24743	9.67357	9.72193	9.77772					8	8	8	32.9	18795	127.33	21123000000	131	173	7
595	5.994	990087	Q1	P30085;Q5T0D2;P30085-2;E9PJD2	P30085;Q5T0D2;P30085-2	UMP-CMP kinase	CMPK1	5.95688	6.04002	5.98545	3.16255	3.23029	3.18541	9.84203	9.92517	9.8706					16	16	16	71.4	22222	323.31	33187000000	217	196	10
596	5.994	989694	Q1	P11766;H0YAG8;D6RFE4;D6R9G2;D6RAY0	P11766;H0YAG8	Alcohol dehydrogenase class-3	ADH5	5.97479	6.02036	5.98689	3.18045	3.21062	3.18684	10.036	10.0816	10.0481					23	23	23	73.8	39724	323.31	43197000000	160	374	15
597	5.993	987585	Q1	P27708;F8VPD4;H7C2E4;H7C3Z5	P27708;F8VPD4	CAD protein;Glutamine-dependent carbamoyl-phosphate synthase;Aspartate carbamoyltransferase;Dihydroorotase	CAD	5.98287	5.98599	6.01161	3.18854	3.17625	3.21157	10.883	10.8861	10.9117					141	141	122	71.8	242980	323.31	318700000000	1400	2225	103.5
598	5.993	987309	Q1	P23919;P23919-2;H7C312;H7BZ20;G5E9E9;H7C3A4	P23919;P23919-2;H7C312;H7BZ20	Thymidylate kinase	DTYMK	5.97985	6.03777	5.96208	3.18552	3.22804	3.16204	10.0264	10.0843	10.0086					26	26	26	85.8	23819	323.31	45041000000	167	212	14.5
599	5.993	987285	Q1	P09622;E9PEX6;P09622-2;P09622-3;F8WDM5;A0A1W2PR83;F2Z2E3	P09622;E9PEX6;P09622-2;P09622-3	Dihydrolipoyl dehydrogenase, mitochondrial;Dihydrolipoyl dehydrogenase	DLD	5.9996	5.94545	6.03411	3.20527	3.13572	3.23406	10.1965	10.1424	10.231					24	24	24	59.3	54177	323.31	65139000000	338	509	20.5
600	5.993	986068	Q1	P33991;E5RG31;E5RFJ8;E5RFR3	P33991	DNA replication licensing factor MCM4	MCM4	5.98195	5.9934	6.00328	3.18762	3.18366	3.20323	10.5203	10.5318	10.5416					55	55	54	65.6	96557	323.31	139250000000	623	863	45
601	5.992	985562	Q1	Q14498-2;Q14498;Q14498-3;G3XAC6;H0Y4X3;A0A0U1RQH7;Q5QP23;A0A0U1RQW2;Q5QP22;F8WF24;F2Z2Z5;A8MYG5;F2Z3E6;A0A087X122	Q14498-2;Q14498;Q14498-3;G3XAC6;H0Y4X3;A0A0U1RQH7	RNA-binding protein 39	RBM39	5.99277	6.0001	5.98282	3.19844	3.19037	3.18277	10.2001	10.2075	10.1902					35	35	31	59.9	58656	323.31	71367000000	357	524	21
602	5.992	983927	Q1	P17174;P17174-2	P17174;P17174-2	Aspartate aminotransferase, cytoplasmic	GOT1	5.97294	6.01546	5.98721	3.17861	3.20573	3.18716	10.1905	10.2331	10.2048					31	31	31	90.3	46247	323.31	65928000000	240	413	21.5
603	5.992	982372	Q1	Q92621;U3KPX2;U3KQ97;U3KQ47	Q92621	Nuclear pore complex protein Nup205	NUP205	5.99867	5.99037	5.98602	3.20433	3.18063	3.18597	10.875	10.8667	10.8624					86	86	86	53.9	227920	323.31	269790000000	481	2012	98
604	5.991	982268	Q1	P30049	P30049	ATP synthase subunit delta, mitochondrial	ATP5D	5.9564	5.95972	6.05778	3.16206	3.14999	3.25773	9.54052	9.54384	9.6419					5	5	5	38.1	17490	110.49	16985000000	117	168	5
605	5.991	981648	Q1	Q9H299;Q5T123	Q9H299;Q5T123	SH3 domain-binding glutamic acid-rich-like protein 3	SH3BGRL3	5.91866	5.97625	6.07782	3.12433	3.16652	3.27777	9.50278	9.56037	9.66194					3	3	3	67.7	10438	112.59	15803000000	38	93	5
606	5.99	981104	Q1	P08621;P08621-2;P08621-4;P08621-3;M0QYR1;M0QX04	P08621;P08621-2;P08621-4	U1 small nuclear ribonucleoprotein 70 kDa	SNRNP70	5.98081	6.00007	5.98864	3.18647	3.19034	3.1886	10.0701	10.0893	10.0779					37	37	37	60.4	51556	323.31	48753000000	296	437	16
607	5.988	977037	Q1	O43809;H3BND3;H3BV41	O43809;H3BND3	Cleavage and polyadenylation specificity factor subunit 5	NUDT21	5.91308	5.98899	6.06203	3.11875	3.17926	3.26198	9.85893	9.93484	10.0079					16	16	16	65.2	26227	122.66	39845000000	133	227	11.5
608	5.987	974677	Q1	P42166	P42166	Lamina-associated polypeptide 2, isoform alpha;Thymopoietin;Thymopentin	TMPO	5.95995	5.98076	6.01955	3.16561	3.17103	3.2195	10.4014	10.4222	10.461					55	55	38	67.1	75491	323.31	109480000000	534	694	36
609	5.986	971537	Q1	Q9NX55;J3QT56;Q9NX55-3	Q9NX55	Huntingtin-interacting protein K	HYPK	5.96613	5.95965	6.03154	3.1718	3.14992	3.23149	9.62943	9.62295	9.69484					12	12	12	58.9	14665	323.31	20457000000	127	129	6
610	5.985	970524	Q1	O96008;O96008-2;K7EJ57;K7EKG4	O96008;O96008-2	Mitochondrial import receptor subunit TOM40 homolog	TOMM40	5.96529	6.05975	5.93113	3.17096	3.25001	3.13108	9.80468	9.89914	9.77052					15	15	15	69	37893	323.31	26583000000	117	361	9
611	5.983	965231	Q1	Q86VP6;Q86VP6-2;A0A0C4DGH5;H0YH27;Q86VP6-3;F5H6I6;O75155-2;O75155;F8WBB8	Q86VP6;Q86VP6-2;A0A0C4DGH5	Cullin-associated NEDD8-dissociated protein 1	CAND1	5.96119	5.98519	6.00234	3.16685	3.17546	3.20229	10.6022	10.6262	10.6434					79	79	79	70	136370	323.31	165800000000	699	1230	57
612	5.981	962794	Q1	P56192;P56192-2;H0YIP0;F5H2V6;H0YHV5;H0YI94;F8VS26;F8W0M7;F8W0S4;F8VZZ9;F8VPL7;H0YHL6;H0YI27	P56192;P56192-2	Methionine--tRNA ligase, cytoplasmic	MARS	5.96873	6.00559	5.97017	3.1744	3.19586	3.17012	10.3724	10.4093	10.3738					49	49	49	64.1	101110	323.31	102040000000	451	900	33
613	5.981	962128	Q1	P11586;F5H2F4;V9GYY3;V9GY75	P11586;F5H2F4	C-1-tetrahydrofolate synthase, cytoplasmic;Methylenetetrahydrofolate dehydrogenase;Methenyltetrahydrofolate cyclohydrolase;Formyltetrahydrofolate synthetase;C-1-tetrahydrofolate synthase, cytoplasmic, N-terminally processed	MTHFD1	5.98005	6.00299	5.96128	3.18572	3.19326	3.16123	10.5976	10.6205	10.5788					69	69	67	81.2	101560	323.31	170370000000	682	935	54
614	5.981	959036	Q1	O96019;O96019-2;H7C5S0;C9JQT2;O94805	O96019;O96019-2	Actin-like protein 6A	ACTL6A	5.96957	6.05644	5.91624	3.17523	3.24671	3.11619	10.1219	10.2088	10.0686					25	25	25	62.2	47460	323.31	56728000000	241	429	18.5
615	5.98	958903	Q1	Q9Y3F4;Q9Y3F4-2;H0YH33;F5H1G1	Q9Y3F4;Q9Y3F4-2	Serine-threonine kinase receptor-associated protein	STRAP	5.94936	5.96477	6.02591	3.15503	3.15504	3.22587	10.1769	10.1923	10.2535					25	25	25	88.9	38438	323.31	65091000000	246	350	22
616	5.979	957832	Q1	Q9H773;H3BSA6;H3BPN2	Q9H773	dCTP pyrophosphatase 1	DCTPP1	6.03337	5.95846	5.94578	3.23903	3.14873	3.14574	9.95991	9.885	9.87233					18	18	18	80.6	18681	323.31	29154000000	101	170	11
617	5.979	957094	Q1	P30047;P30047-2;H0YNM1;H0YNX7;A0A087WTI4	P30047;P30047-2;H0YNM1;H0YNX7	GTP cyclohydrolase 1 feedback regulatory protein	GCHFR	5.89987	6.05453	5.9825	3.10554	3.24479	3.18246	9.32909	9.48375	9.41172					6	6	6	89.3	9698.1	125.19	11210000000	56	84	3.5
618	5.978	953327	Q1	Q9BPX5	Q9BPX5	Actin-related protein 2/3 complex subunit 5-like protein	ARPC5L	6.00253	5.96517	5.96516	3.2082	3.15544	3.16512	9.84192	9.80456	9.80456					15	15	14	70.6	16941	323.31	24720000000	108	153	9
619	5.976	950563	Q1	P07355;P07355-2;H0YN42;H0YMD0;H0YMU9;H0YM50;A6NMY6;H0YNP5;H0YN28;H0YL33;H0YKS4;H0YMM1;H0YKZ7;H0YLV6;H0YMT9;H0YKX9;H0YKL9;H0YMW4;H0YNA0;H0YKV8;H0YMD9;H0YN52;H0YNB8;H0YKN4;H0YLE2	P07355;P07355-2;H0YN42;H0YMD0;H0YMU9;H0YM50;A6NMY6	Annexin A2;Annexin;Putative annexin A2-like protein	ANXA2;ANXA2P2	6.0035	5.94914	5.97513	3.20917	3.1394	3.17508	10.1674	10.113	10.139					37	37	37	81.4	38604	323.31	54378000000	270	339	19
620	5.976	947303	Q1	Q13200;Q13200-2;C9JPC0;H7C2Q3;H7C1H2;F8WBS8	Q13200;Q13200-2	26S proteasome non-ATPase regulatory subunit 2	PSMD2	5.95368	5.98965	5.984	3.15935	3.17992	3.18396	10.4921	10.528	10.5224					72	72	19	14.9	100200	323.31	137250000000	703	908	45
621	5.975	946379	Q1	J3QQM5;Q9BT23;J3QL69;J3KRR0	J3QQM5;Q9BT23;J3QL69;J3KRR0	LIM domain-containing protein 2	LIMD2	5.9617	6.00328	5.95989	3.16737	3.19354	3.15984	9.69195	9.73353	9.69013					9	8	8	58.7	12013	110.34	21195000000	95	109	7
622	5.974	945030	Q1	Q1KMD3;H3BQZ7	Q1KMD3;H3BQZ7	Heterogeneous nuclear ribonucleoprotein U-like protein 2	HNRNPUL2;HNRNPUL2-BSCL2	5.96649	5.98869	5.96711	3.17215	3.17895	3.16706	10.4019	10.4241	10.4025					46	46	46	58.9	85104	323.31	97896000000	319	747	35.5
623	5.972	944977	Q1	Q15393;Q15393-3;Q15393-2;I3L4G7;J3QL37;H3BMB0;J3QRB2;J3QKV4	Q15393	Splicing factor 3B subunit 3	SF3B3	5.9528	5.96738	5.99665	3.15847	3.15764	3.1966	10.554	10.5685	10.5978					68	68	68	70.3	135580	323.31	155130000000	599	1217	52
624	5.972	942359	Q1	P54136;E5RJM9;E5RH09	P54136	Arginine--tRNA ligase, cytoplasmic	RARS	5.97978	5.92633	6.00985	3.18545	3.1166	3.20981	10.4331	10.3797	10.4632					54	54	5	8.2	75378	323.31	107530000000	468	660	37
625	5.971	940713	Q1	Q9H9B4;D6RFI0;S4R2X2;D6RDG7;D6RAE9	Q9H9B4;D6RFI0	Sideroflexin-1	SFXN1	5.88823	6.00195	6.02428	3.0939	3.19222	3.22424	9.88732	10.001	10.0234					19	19	18	66.1	35619	262.38	38625000000	211	322	13
626	5.97	940479	Q1	P31930	P31930	Cytochrome b-c1 complex subunit 1, mitochondrial	UQCRC1	5.93838	6.00699	5.96437	3.14405	3.19726	3.16433	10.2037	10.2723	10.2297					31	31	30	69.4	52645	323.31	74760000000	262	480	24
627	5.97	939247	Q1	P60520;H3BSM5;H3BQ50;H3BU36	P60520;H3BSM5	Gamma-aminobutyric acid receptor-associated protein-like 2	GABARAPL2	5.93099	5.96835	6.01015	3.13665	3.15862	3.2101	9.66123	9.6986	9.74039					10	10	9	61.5	13667	34.966	20095000000	60	117	7
628	5.97	938991	Q1	O75822;O75822-3;O75822-2;H0YLP3;H0YGJ7	O75822;O75822-3;O75822-2;H0YLP3	Eukaryotic translation initiation factor 3 subunit J	EIF3J	5.9202	5.98683	6.00176	3.12587	3.17709	3.20171	9.88453	9.95116	9.96609					21	21	21	77.9	29062	323.31	37346000000	165	258	12
629	5.969	935474	Q1	P51148;P51148-2;K7ENY4;K7ERI8;F8VVK3;F8VWU4;F8VSF8;K7EIP6	P51148;P51148-2;K7ENY4;K7ERI8;F8VVK3	Ras-related protein Rab-5C	RAB5C	5.90609	6.04399	5.95694	3.11176	3.23426	3.15689	9.69433	9.83223	9.74518					12	12	5	29.2	23482	132.83	23330000000	103	216	8
630	5.969	935444	Q1	P55010;H0YLZ1;H0YN40;H0YMJ8;H0YM54;H0YK11;H0YK29	P55010	Eukaryotic translation initiation factor 5	EIF5	5.92928	5.99133	5.98597	3.13495	3.1816	3.18593	10.1569	10.2189	10.2135					35	35	35	56.6	49222	323.31	67825000000	286	431	22
631	5.968	935061	Q1	P20340-2;P20340-4;Q53S08;Q9H0N0	P20340-2;P20340-4	Ras-related protein Rab-6A	RAB6A	5.87026	6.00749	6.02653	3.07593	3.19776	3.22648	9.83459	9.97182	9.99086					18	18	2	14.4	23548	243.38	33755000000	143	208	12
632	5.966	932724	Q1	Q9NQP4;E9PQY2	Q9NQP4;E9PQY2	Prefoldin subunit 4	PFDN4	6.0078	5.92807	5.96339	3.21346	3.11834	3.16334	9.37007	9.29035	9.32566					7	7	7	43.3	15314	323.31	10263000000	49	134	3
633	5.966	928214	Q1	P26038;V9GZ54	P26038	Moesin	MSN	5.93583	5.94844	6.01416	3.14149	3.13871	3.21411	10.3395	10.3521	10.4178					57	45	40	56.7	67819	323.31	103990000000	437	577	33
634	5.966	927941	Q1	P00367;P00367-3;P00367-2;P49448	P00367;P00367-3;P00367-2;P49448	Glutamate dehydrogenase 1, mitochondrial;Glutamate dehydrogenase 2, mitochondrial	GLUD1;GLUD2	5.96889	5.96447	5.96452	3.17456	3.15474	3.16447	10.3089	10.3045	10.3045					40	40	40	67	61397	323.31	77203000000	340	558	28.5
635	5.964	924624	Q1	Q9Y6A9;C9JBL1;X6R2S6	Q9Y6A9;C9JBL1;X6R2S6	Signal peptidase complex subunit 1	SPCS1	5.85746	6.11878	5.91656	3.06312	3.30905	3.11652	9.04364	9.30496	9.10274					4	4	4	32.4	11805	118.62	7672800000	55	102	2
636	5.964	922325	Q1	Q12874	Q12874	Splicing factor 3A subunit 3	SF3A3	5.94579	5.96771	5.97874	3.15145	3.15798	3.1787	10.2111	10.2331	10.2441					42	42	42	73.5	58848	323.31	67969000000	334	501	24
637	5.962	921074	Q1	Q15555;Q15555-3;Q15555-4;Q15555-2	Q15555;Q15555-3;Q15555-4;Q15555-2	Microtubule-associated protein RP/EB family member 2	MAPRE2	5.90869	5.94876	6.02852	3.11436	3.13903	3.22848	9.96993	10.01	10.0898					23	22	1	9.2	37031	323.31	36567000000	137	327	15
638	5.962	919443	Q1	B4DR80;Q9Y6E0-2;Q9Y6E0;H0Y630;Q5JV98;Q5JV99	B4DR80;Q9Y6E0-2;Q9Y6E0;H0Y630;Q5JV98	Serine/threonine-protein kinase 24;Serine/threonine-protein kinase 24 36 kDa subunit;Serine/threonine-protein kinase 24 12 kDa subunit	STK24	5.95568	5.95291	5.9768	3.16134	3.14318	3.17675	10.1419	10.1391	10.163					31	31	21	50	45835	323.31	55716000000	235	412	20
639	5.96	916069	Q1	P55884;P55884-2;C9JZG1;C9JQN7	P55884;P55884-2	Eukaryotic translation initiation factor 3 subunit B	EIF3B	5.96523	5.95827	5.95704	3.17089	3.14854	3.157	10.4244	10.4175	10.4162					51	51	51	67.8	92480	323.31	110390000000	389	814	37.5
640	5.96	913059	Q1	P42765;A0A0B4J2A4;K7EME0;K7EJ68;K7EJB1;K7ER88	P42765;A0A0B4J2A4;K7EME0	3-ketoacyl-CoA thiolase, mitochondrial	ACAA2	5.96771	5.97984	5.93257	3.17337	3.17011	3.13253	10.1751	10.1872	10.1399					27	27	27	85.9	41924	323.31	60854000000	297	397	21
641	5.959	912422	Q1	P25205;P25205-2	P25205;P25205-2	DNA replication licensing factor MCM3	MCM3	5.96267	5.96961	5.94394	3.16834	3.15988	3.1439	10.5638	10.5708	10.5451					78	78	9	6.8	90980	323.31	147950000000	860	808	52
642	5.957	909654	Q1	Q12931-2;Q12931;I3L0K7;I3L239;I3L253;I3L2D5	Q12931-2;Q12931;I3L0K7	Heat shock protein 75 kDa, mitochondrial	TRAP1	5.93914	5.97299	5.95971	3.14481	3.16325	3.15966	10.3806	10.4144	10.4012					51	51	51	68.5	74267	323.31	103780000000	420	651	36
643	5.957	907730	Q1	P09960;P09960-4;P09960-2;P09960-3;B4DEH5	P09960;P09960-4;P09960-2;P09960-3	Leukotriene A-4 hydrolase	LTA4H	5.96793	5.98614	5.91687	3.1736	3.1764	3.11682	10.3374	10.3556	10.2863					41	41	41	73.8	69284	323.31	87403000000	340	611	30.5
644	5.955	906853	Q1	Q9NR45;Q5TBR1;Q5TBR0	Q9NR45	Sialic acid synthase	NANS	5.92893	6.00141	5.93448	3.1346	3.19168	3.13443	10.0182	10.0907	10.0237					24	24	24	67.4	40307	323.31	46155000000	314	359	16
645	5.953	906775	Q1	P33992;B1AHB1;B1AHA9;F8WFD7	P33992;B1AHB1	DNA replication licensing factor MCM5;DNA helicase	MCM5	6.03723	5.89331	5.92885	3.24289	3.08358	3.1288	10.5244	10.3805	10.4161					58	58	45	62.4	82285	323.31	115280000000	524	734	40
646	5.953	904085	Q1	P54578;P54578-2;P54578-3;A6NJA2;J3QQT6;J3KS55	P54578;P54578-2;P54578-3;A6NJA2	Ubiquitin carboxyl-terminal hydrolase 14;Ubiquitin carboxyl-terminal hydrolase	USP14	5.90618	5.98716	5.96431	3.11185	3.17743	3.16426	10.1805	10.2615	10.2386					38	38	38	84.6	56068	323.31	67771000000	331	494	24.5
647	5.952	899228	Q1	Q13435;E9PPJ0;E9PJ04;H0YCG1;E9PJT3;H0YEX5;E9PIL8	Q13435;E9PPJ0	Splicing factor 3B subunit 2	SF3B2	5.91097	5.96325	5.98284	3.11663	3.15352	3.18279	10.4396	10.4918	10.5114					64	64	64	65.1	100230	323.31	123360000000	573	895	44
648	5.949	898252	Q1	O15371-3;O15371;O15371-2;B0QYA5;B0QYA6;B0QYA4;B0QYA8;A0A0D9SGB5	O15371-3;O15371;O15371-2	Eukaryotic translation initiation factor 3 subunit D	EIF3D	5.94232	5.9821	5.9213	3.14799	3.17237	3.12126	10.2254	10.2652	10.2044					35	35	35	64.5	62039	323.31	71494000000	373	533	25
649	5.948	890398	Q1	P46060;H0Y4Q3;B0QYT5;B0QYT4;B0QYT6	P46060	Ran GTPase-activating protein 1	RANGAP1	5.92615	5.91137	6.00525	3.13182	3.10164	3.2052	10.2427	10.2279	10.3218					42	42	42	72.2	63541	323.31	69277000000	348	587	27
650	5.947	889841	Q1	Q13363;Q13363-2;D6RAX2;E7ESU7;E7EPF8;E9PGB1;H0Y8W7;Q5SQP8;P56545;P56545-3;P56545-2;H0Y9M9;E7EUB3;H0Y8U5;A0A087WYL1	Q13363;Q13363-2;D6RAX2;E7ESU7;E7EPF8	C-terminal-binding protein 1	CTBP1	5.89981	5.94984	5.99225	3.10548	3.14011	3.1922	9.82635	9.87639	9.91879					23	23	23	65.5	47535	323.31	33296000000	134	440	11
651	5.946	889072	Q1	Q12907;D6RBV2;D6RDX1;D6RIU4;D6RBH1	Q12907;D6RBV2;D6RDX1;D6RIU4	Vesicular integral-membrane protein VIP36	LMAN2	5.88715	6.01042	5.93906	3.09281	3.20069	3.13902	9.94839	10.0717	10.0003					22	22	22	61.2	40228	323.31	37849000000	169	356	15
652	5.945	888177	Q1	Q16881-4;A0A087WSW9;A0A087WSY9;Q16881-3;Q16881;F8W809;A0A182DWI3;Q16881-5;Q16881-2;Q16881-6;E9PIR7;E2QRB9;Q16881-7;E9PKD3;A0A0B4J225;E9PIZ5;E9PLT3;E9PKI4;E9PQI3;E9PRI8;E9PJU2	Q16881-4;A0A087WSW9;A0A087WSY9;Q16881-3;Q16881;F8W809;A0A182DWI3;Q16881-5;Q16881-2;Q16881-6;E9PIR7;E2QRB9;Q16881-7	Thioredoxin reductase 1, cytoplasmic	TXNRD1	5.95928	5.90721	5.96756	3.16495	3.09748	3.16751	10.2758	10.2237	10.2841					42	42	41	74.6	60419	323.31	71851000000	401	551	27
653	5.943	882051	Q1	P41227;P41227-2;F8W808;C9JN83;C9JW55;Q9BSU3;H0Y8T0	P41227;P41227-2;F8W808;C9JN83	N-alpha-acetyltransferase 10	NAA10	5.90515	5.96192	5.96337	3.11081	3.15219	3.16332	9.88721	9.94398	9.94543					18	18	8	22.6	26458	323.31	34850000000	204	235	12.5
654	5.94	879656	Q1	A0A0A0MRJ6;H7BY58;P22061;P22061-2;F6S8N6;F8WDT3;F8WAV5;F8WAX2;C9J0F2;H7C4X2	A0A0A0MRJ6;H7BY58;P22061;P22061-2;F6S8N6	Protein-L-isoaspartate O-methyltransferase;Protein-L-isoaspartate(D-aspartate) O-methyltransferase	PCMT1	5.9217	5.88952	6.00778	3.12737	3.07979	3.20773	9.95298	9.9208	10.0391					15	15	15	63.9	30315	228.52	46086000000	153	285	14
655	5.939	876163	Q1	P24666;G5E9R5;P24666-4;P24666-3;F2Z2Q9	P24666;G5E9R5;P24666-4;P24666-3	Low molecular weight phosphotyrosine protein phosphatase	ACP1	5.91434	5.97989	5.92394	3.12	3.17016	3.1239	9.67455	9.7401	9.68415		+			14	14	5	22.8	18042	323.31	18018000000	95	158	7.5
656	5.939	875271	Q1	Q9ULC4;Q9ULC4-3;Q9ULC4-2	Q9ULC4;Q9ULC4-3;Q9ULC4-2	Malignant T-cell-amplified sequence 1	MCTS1	6.00207	5.89776	5.91799	3.20774	3.08803	3.11795	9.88722	9.78291	9.80314					11	11	11	79	20555	123.14	31589000000	135	181	10
657	5.939	874521	Q1	Q99613;B5ME19;Q99613-2;H3BPE4;H3BPE3;H3BTY8	Q99613;B5ME19;Q99613-2	Eukaryotic translation initiation factor 3 subunit C;Eukaryotic translation initiation factor 3 subunit C-like protein	EIF3C;EIF3CL	5.90723	5.97102	5.93845	3.11289	3.16128	3.1384	10.4156	10.4794	10.4468					50	50	50	51.5	105340	323.31	120100000000	447	913	42
658	5.938	874317	Q1	Q99436;Q5TBG5;Q99436-2	Q99436	Proteasome subunit beta type-7	PSMB7	5.9843	5.97219	5.858	3.18997	3.16245	3.05795	9.91084	9.89873	9.78454					15	15	15	84.5	29965	323.31	30457000000	191	277	11
659	5.938	873471	Q1	Q13547;Q5TEE2	Q13547	Histone deacetylase 1	HDAC1	5.86145	5.9901	5.96192	3.06711	3.18037	3.16188	10.0688	10.1975	10.1693					29	29	20	54.6	55102	323.31	59413000000	275	482	21
660	5.938	873461	Q1	Q13162;H7C3T4;A6NJJ0;A6NG45	Q13162;H7C3T4	Peroxiredoxin-4	PRDX4	5.86308	6.01386	5.93641	3.06875	3.20413	3.13636	9.87857	10.0293	9.95189					18	14	14	57.9	30540	323.31	35101000000	110	271	13.5
661	5.937	871696	Q1	P61024;Q5T179;Q9BZU3	P61024;Q5T179	Cyclin-dependent kinases regulatory subunit 1;Cyclin-dependent kinases regulatory subunit	CKS1B	5.95048	5.96441	5.89634	3.15614	3.15467	3.09629	9.43769	9.45162	9.38355					6	6	5	73.4	9660.1	278.39	11804000000	66	79	4
662	5.936	870318	Q1	O60925;E5RGS4;D6RGG5	O60925;E5RGS4	Prefoldin subunit 1	PFDN1	5.93092	5.91415	5.9642	3.13658	3.10441	3.16415	9.71916	9.70239	9.75244					10	10	10	68.9	14210	197.35	18999000000	88	122	8
663	5.935	867065	Q1	J3KNF8;J3QR91	J3KNF8		CYB5B	5.89544	5.99074	5.91847	3.10111	3.18101	3.11842	9.55874	9.65404	9.58177					10	10	3	22	16694	323.31	16158000000	101	150	6
664	5.935	865554	Q1	C9JLU1;P52434;P52434-4;P52434-3;P52434-2;P52434-5	C9JLU1;P52434;P52434-4;P52434-3	DNA-directed RNA polymerases I, II, and III subunit RPABC3	POLR2H	5.90922	5.96084	5.93403	3.11489	3.1511	3.13398	9.74861	9.80023	9.77342					10	10	10	75	16925	260.01	20593000000	60	148	9
665	5.934	864814	Q1	Q9BZZ5-2;Q9BZZ5-5	Q9BZZ5-2;Q9BZZ5-5	Apoptosis inhibitor 5	API5	5.94787	5.96063	5.89494	3.15354	3.1509	3.09489	10.2041	10.2169	10.1512					28	28	1	2.4	56769	323.31	57293000000	248	504	23.5
666	5.934	864591	Q1	E7EX17;P23588;P23588-2;F8VX11;F8VP89;F8VSC7;F8W0K0;F8VYE9;F8VRU1;REV__F8VX11;REV__P23588-2;REV__P23588;REV__E7EX17	E7EX17;P23588;P23588-2;F8VX11	Eukaryotic translation initiation factor 4B	EIF4B	5.8452	5.92197	6.03531	3.05086	3.11224	3.23527	10.1453	10.2221	10.3354					76	76	76	82.8	69697	323.31	74476000000	525	616	26
667	5.933	862572	Q1	A0A0G2JIW1;P0DMV9;P0DMV8;P0DMV8-2;V9GZ37	A0A0G2JIW1;P0DMV9;P0DMV8;P0DMV8-2;V9GZ37	Heat shock 70 kDa protein 1B;Heat shock 70 kDa protein 1A	HSPA1B;HSPA1A	5.90722	5.92126	5.97099	3.11289	3.11153	3.17095	10.2975	10.3116	10.3613					45	38	22	49.7	70108	323.31	85722000000	310	642	32
668	5.933	861789	Q1	P14317;E7EVW7;P14317-2;F8WDD5;F8WEZ6	P14317;E7EVW7	Hematopoietic lineage cell-specific protein	HCLS1	5.88583	5.90972	6.00285	3.0915	3.09998	3.20281	10.014	10.0379	10.131					30	30	30	54.1	54013	323.31	50189000000	229	486	17.5
669	5.931	861404	Q1	P11912;M0QX61;P11912-2	P11912	B-cell antigen receptor complex-associated protein alpha chain	CD79A	5.86728	6.02907	5.89804	3.07295	3.21934	3.09799	9.53058	9.69237	9.56134					6	6	6	42.5	25038	224.28	15629000000	91	226	6
670	5.931	859073	Q1	Q15459;Q15459-2;H7C1L2;F8WB66;F8WC79	Q15459;Q15459-2	Splicing factor 3A subunit 1	SF3A1	5.89605	5.91857	5.97859	3.10172	3.10884	3.17854	10.3667	10.3892	10.4492					47	47	47	62.7	88885	323.31	101690000000	456	793	38.5
671	5.929	856026	Q1	O14929;O14929-2;F8W9G7;F8WEW1	O14929;O14929-2	Histone acetyltransferase type B catalytic subunit	HAT1	5.90638	5.87757	6.00326	3.11205	3.06784	3.20321	9.92187	9.89306	10.0187					20	20	20	69.5	49512	323.31	37951000000	181	419	13.5
672	5.928	855991	Q1	P05023-4;P05023;P05023-3;P05023-2;Q5TC01;P20648;Q5TC02;Q5TC05	P05023-4;P05023;P05023-3;P05023-2	Sodium/potassium-transporting ATPase subunit alpha-1	ATP1A1	5.90699	5.96155	5.91626	3.11266	3.15182	3.11621	10.4405	10.4951	10.4498					56	56	33	31.8	113000	323.31	116900000000	419	1023	44.5
673	5.928	852218	Q1	Q16531;F5GY55;Q16531-2;F5H2L3;F5GWI0;F5GZY8;F5GYG8;F5H198	Q16531;F5GY55	DNA damage-binding protein 1	DDB1	5.92744	5.94976	5.90677	3.1331	3.14003	3.10672	10.5369	10.5592	10.5162					67	67	67	68.2	126970	323.31	138480000000	559	1140	53
674	5.927	850626	Q1	E9PKH8;P11836;P11836-2;E9PPL6	E9PKH8;P11836;P11836-2	B-lymphocyte antigen CD20	MS4A1	5.85596	5.9479	5.97644	3.06162	3.13816	3.1764	9.69535	9.78729	9.81584					14	14	14	37.3	31609	323.31	21792000000	105	284	9
675	5.926	849039	Q1	O75533;H7C341;B4DGZ4;O75533-2;F8WC19	O75533	Splicing factor 3B subunit 1	SF3B1	5.89351	5.93295	5.95132	3.09918	3.12322	3.15127	10.5711	10.6105	10.6289					108	108	108	76.6	145830	323.31	172940000000	1005	1304	62
676	5.926	847896	Q1	Q15758;M0QXM4;Q15758-3;Q15758-2;M0QX44	Q15758;M0QXM4;Q15758-3;Q15758-2	Neutral amino acid transporter B(0);Amino acid transporter	SLC1A5	5.86458	6.01403	5.89857	3.07025	3.20429	3.09852	9.82891	9.97836	9.8629					10	10	10	24.4	56598	140.63	27399000000	81	541	12
677	5.925	844482	Q1	P61106;X6RFL8	P61106;X6RFL8	Ras-related protein Rab-14	RAB14	5.89934	5.90664	5.9692	3.10501	3.09691	3.16915	9.96058	9.96788	10.0304					22	22	22	86.5	23897	323.31	38139000000	207	215	15
678	5.924	843737	Q1	P47897;P47897-2;B4DDN1;A0A0U1RQT0;C9J165;A0A0U1RQE9;A0A0U1RRI9;A0A0U1RQL2;A0A0U1RQM8;A0A0U1RQU2;F2Z2V6;A0A0U1RQC3	P47897;P47897-2;B4DDN1	Glutamine--tRNA ligase	QARS	5.92305	5.96913	5.8793	3.12871	3.15939	3.07925	10.4517	10.4977	10.4079					64	63	5	7.1	87798	323.31	117080000000	655	775	44
679	5.923	842117	Q1	Q9UKD2	Q9UKD2	mRNA turnover protein 4 homolog	MRTO4	5.9366	5.89976	5.93294	3.14227	3.09002	3.13289	9.99784	9.961	9.99418					16	16	16	59.4	27560	145.6	43769000000	145	239	15
680	5.923	841069	Q1	O75506	O75506	Heat shock factor-binding protein 1	HSBP1	5.93037	5.9703	5.86773	3.13604	3.16056	3.06768	9.5145	9.55442	9.45185					7	7	7	90.8	8543.5	282.84	14040000000	107	76	5
681	5.922	838670	Q1	Q13155;A8MU58	Q13155;A8MU58	Aminoacyl tRNA synthase complex-interacting multifunctional protein 2	AIMP2	5.88294	5.97856	5.90334	3.08861	3.16882	3.10329	9.91422	10.0098	9.93461					16	16	4	23.4	35348	323.31	32737000000	191	320	14
682	5.921	838324	Q1	Q8WXF1;Q8WXF1-2;X6RDA4;A0A0U1RQF9	Q8WXF1;Q8WXF1-2	Paraspeckle component 1	PSPC1	5.92068	5.90022	5.94248	3.12635	3.09049	3.14243	10.0489	10.0284	10.0707					43	43	43	67.1	58743	323.31	42919000000	314	523	17.5
683	5.92	834582	Q1	P47813;O14602;X6RAC9;A6NJH9	P47813;O14602;X6RAC9	Eukaryotic translation initiation factor 1A, X-chromosomal;Eukaryotic translation initiation factor 1A, Y-chromosomal	EIF1AX;EIF1AY	5.90008	5.90551	5.9554	3.10575	3.09577	3.15535	9.63033	9.63576	9.68564					13	13	13	74.3	16460	323.31	17136000000	103	144	7
684	5.92	834099	Q1	E9PES6;E7ES08;E7EQU1;O15347	E9PES6;E7ES08;E7EQU1;O15347	High mobility group protein B3	HMGB3	5.96728	5.8993	5.89311	3.17295	3.08957	3.09306	9.63058	9.5626	9.55641					15	14	14	49	17522	323.31	15239000000	94	153	6
685	5.92	833776	Q1	P30043;M0R192;M0QZL1	P30043;M0R192	Flavin reductase (NADPH)	BLVRB	5.90232	5.92791	5.92828	3.10799	3.11818	3.12823	9.78747	9.81306	9.81343					16	16	16	91.3	22119	323.31	28869000000	143	206	10
686	5.919	833534	Q1	P51858;P51858-2;P51858-3	P51858;P51858-2;P51858-3	Hepatoma-derived growth factor	HDGF	5.91146	5.94563	5.89871	3.11713	3.13589	3.09867	10.0271	10.0612	10.0143					21	20	20	72.1	26788	323.31	46330000000	148	240	17
687	5.917	831134	Q1	Q9UHV9	Q9UHV9	Prefoldin subunit 2	PFDN2	5.92354	5.89842	5.92956	3.12921	3.08868	3.12952	9.80869	9.78357	9.81471					7	7	7	53.9	16648	90.59	27258000000	77	154	10
688	5.916	829958	Q1	P04233-2	P04233-2	HLA class II histocompatibility antigen gamma chain	CD74	5.89998	5.94783	5.90032	3.10564	3.1381	3.10028	9.86431	9.91216	9.86465					13	13	2	12.5	26398	222.09	31606000000	115	232	12
689	5.916	829508	Q1	P61960;H0Y614;P61960-2	P61960;H0Y614;P61960-2	Ubiquitin-fold modifier 1	UFM1	5.85658	5.91336	5.97801	3.06225	3.10363	3.17796	9.4407	9.49748	9.56213					6	6	6	72.9	9117.5	158.78	12567000000	49	85	5
690	5.916	828035	Q1	E7ETZ4;Q9Y6E2;Q75MG1;B5MCH7;E7EMS9;B5MCE7;C9JF98;Q9Y6E2-2;E9PFE3;F8WDX8;E9PFD4	E7ETZ4;Q9Y6E2;Q75MG1;B5MCH7;E7EMS9;B5MCE7	Basic leucine zipper and W2 domain-containing protein 2	BZW2	5.89141	5.92067	5.93584	3.09708	3.11093	3.13579	10.0883	10.1176	10.1327					37	37	35	63.5	46913	323.31	45880000000	373	408	20.5
691	5.916	827238	Q1	Q96B49	Q96B49	Mitochondrial import receptor subunit TOM6 homolog	TOMM6	5.85374	5.96017	5.93332	3.0594	3.15044	3.13327	9.21601	9.32245	9.29559					4	4	4	70.3	8001.9	53.338	7179400000	44	74	3
692	5.915	826764	Q1	P08579	P08579	U2 small nuclear ribonucleoprotein B	SNRPB2	5.91572	6.00294	5.8262	3.12139	3.19321	3.02616	9.80087	9.88809	9.71135					15	12	12	52	25486	323.31	25030000000	128	225	10
693	5.915	825339	Q1	Q9BY44;Q9BY44-3;F8WAE5;Q9BY44-4;Q9BY44-2;H7C5R5;C9IZE1;H7C5Q3;F8WF18;F8WAT3	Q9BY44;Q9BY44-3;F8WAE5;Q9BY44-4;Q9BY44-2	Eukaryotic translation initiation factor 2A;Eukaryotic translation initiation factor 2A, N-terminally processed	EIF2A	5.90548	5.97898	5.86008	3.11114	3.16925	3.06003	10.282	10.3555	10.2366					40	40	40	82.7	64989	323.31	76961000000	334	585	31
694	5.913	824821	Q1	O00487;C9JW37	O00487	26S proteasome non-ATPase regulatory subunit 14	PSMD14	5.92423	5.90404	5.90968	3.1299	3.09431	3.10963	9.98547	9.96528	9.97092					19	19	19	72.9	34577	323.31	44700000000	236	310	15
695	5.912	824460	Q1	P30520;Q8N142;Q8N142-2;G3V5D8;G3V232;S4R2Z1;G3V2N1	P30520	Adenylosuccinate synthetase isozyme 2	ADSS	5.92011	5.85765	5.95886	3.12578	3.04792	3.15881	10.1063	10.0438	10.145					31	31	31	65.8	50097	323.31	46241000000	262	456	20
696	5.912	823684	Q1	Q9UMX0;Q9UMX0-3;Q9UMX0-4;H0YDS0;H0YEZ9	Q9UMX0	Ubiquilin-1	UBQLN1	5.93167	5.97271	5.83093	3.13734	3.16298	3.03088	9.93077	9.9718	9.83002					20	20	2	9.7	62518	323.31	38109000000	263	589	13
697	5.911	820711	Q1	Q12904;D6R937	Q12904	Aminoacyl tRNA synthase complex-interacting multifunctional protein 1;Endothelial monocyte-activating polypeptide 2	AIMP1	5.8693	5.94248	5.92155	3.07497	3.13275	3.1215	9.9849	10.0581	10.0372					25	25	1	2.6	34352	323.31	44368000000	202	312	17
698	5.911	820038	Q1	P28072;A0A087X2I4;I3L3X7	P28072;A0A087X2I4	Proteasome subunit beta type-6;Proteasome subunit beta type	PSMB6	5.84231	5.89026	6.0005	3.04798	3.08053	3.20045	9.6817	9.72965	9.83989					14	14	14	79.1	25357	271.73	25007000000	91	239	9
699	5.911	818097	Q1	Q9Y5B9;G3V5A4;G3V401;G3V2X0	Q9Y5B9	FACT complex subunit SPT16	SUPT16H	5.88438	5.91372	5.93398	3.09004	3.10399	3.13393	10.5019	10.5313	10.5515					81	81	81	68.9	119910	323.31	143550000000	730	1047	54
700	5.91	817961	Q1	P62312	P62312	U6 snRNA-associated Sm-like protein LSm6	LSM6	5.9091	5.85611	5.96622	3.11477	3.04638	3.16617	9.49322	9.44023	9.55034					8	8	8	90	9127.5	74.228	11514000000	42	80	5
701	5.91	816936	Q1	C9JP00;A0A0A0MQX8;Q9NR56;Q9NR56-7;Q86VM6;C9JCX1;H7C4Y1;C9J4T8	C9JP00;A0A0A0MQX8;Q9NR56;Q9NR56-7;Q86VM6	Muscleblind-like protein 1	MBNL1	5.8816	5.92933	5.91868	3.08727	3.1196	3.11864	9.80814	9.85588	9.84523					13	13	2	13.8	37898	118.27	26190000000	89	348	11
702	5.91	815018	Q1	P00813;F5GWI4;F5GXW0;F5GYD4	P00813;F5GWI4;F5GXW0	Adenosine deaminase	ADA	5.87033	5.95397	5.90423	3.07599	3.14424	3.10418	10.0777	10.1613	10.1116					40	40	40	97	40764	323.31	52143000000	298	363	21
703	5.909	814466	Q1	Q9BS26	Q9BS26	Endoplasmic reticulum resident protein 44	ERP44	5.86447	5.94008	5.92363	3.07014	3.13035	3.12359	10.0506	10.1263	10.1098					27	27	27	75.6	46971	323.31	50938000000	221	406	20
704	5.909	813937	Q1	Q9UBE0;M0QZS6;B3KNJ4;Q9UBE0-2;Q9UBE0-3;M0QX65;M0R054;M0QYM8;M0R286;M0R375;M0QYP2	Q9UBE0;M0QZS6;B3KNJ4;Q9UBE0-2;Q9UBE0-3;M0QX65	SUMO-activating enzyme subunit 1;SUMO-activating enzyme subunit 1, N-terminally processed	SAE1	5.91258	5.89562	5.91915	3.11825	3.08588	3.11911	10.0649	10.0479	10.0715					26	26	26	82.4	38449	323.31	46760000000	242	346	18.5
705	5.908	813487	Q1	O75607	O75607	Nucleoplasmin-3	NPM3	5.8751	5.90591	5.94394	3.08077	3.09618	3.14389	9.66334	9.69415	9.73218					8	8	8	65.7	19343	323.31	23681000000	114	178	8
706	5.906	811392	Q1	P49736;H0Y8E6;F8WDM3;C9JZ21;C9J013;H7C4N9	P49736;H0Y8E6	DNA replication licensing factor MCM2	MCM2	5.92946	5.92237	5.86712	3.13513	3.11264	3.06707	10.4531	10.446	10.3908					64	64	64	69.8	101890	323.31	107680000000	562	904	43.5
707	5.906	811391	Q1	P62253;I3L0Q0;I3L2Q4;I3L2H7;K7EPR7	P62253;I3L0Q0;I3L2Q4	Ubiquitin-conjugating enzyme E2 G1;Ubiquitin-conjugating enzyme E2 G1, N-terminally processed	UBE2G1	5.84094	5.91938	5.95861	3.04661	3.10965	3.15856	9.32816	9.40659	9.44582					13	13	13	65.3	19509	147.23	10486000000	85	170	4
708	5.906	811006	Q1	O43242;O43242-2;H0YGV8;F5H8K4	O43242;O43242-2	26S proteasome non-ATPase regulatory subunit 3	PSMD3	5.90355	5.94273	5.87156	3.10922	3.133	3.07152	10.2511	10.2903	10.2191					51	51	51	73.6	60977	323.31	68717000000	347	534	29
709	5.905	807604	Q1	F8VU90;Q9NYL4-2;Q9NYL4;E9PAR0;H0YHM7	F8VU90;Q9NYL4-2;Q9NYL4	Peptidyl-prolyl cis-trans isomerase;Peptidyl-prolyl cis-trans isomerase FKBP11	FKBP11	5.96618	5.96881	5.78127	3.17184	3.15908	2.98123	9.75442	9.75705	9.56951					7	7	7	46.2	19814	223.13	18577000000	56	182	8
710	5.904	807099	Q1	Q15637-5;Q15637-7;C9J792	Q15637-5;Q15637-7	Splicing factor 1	SF1	5.93241	5.91391	5.86655	3.13808	3.10417	3.0665	10.048	10.0295	9.98214					25	25	5	8.2	71751	323.31	51893000000	242	673	17
711	5.903	803832	Q1	P63218	P63218	Guanine nucleotide-binding protein G(I)/G(S)/G(O) subunit gamma-5	GNG5	5.8899	5.91398	5.9048	3.09556	3.10425	3.10475	9.37711	9.40119	9.39201					7	7	7	88.2	7318.4	188.36	9350600000	47	68	4
712	5.901	799846	Q1	Q9UJU6;Q9UJU6-2;B4DDD6;H0Y5J4;Q9UJU6-6;Q9UJU6-5;Q9UJU6-4;F8WBG8;F8WC20;F8WBB2;F8WFE1;F2Z2V3;F8WB73;F8WCK3;F2Z3E3;H7C111	Q9UJU6;Q9UJU6-2;B4DDD6;H0Y5J4;Q9UJU6-6;Q9UJU6-5;Q9UJU6-4	Drebrin-like protein	DBNL	5.89156	5.95046	5.86148	3.09722	3.14073	3.06144	9.98082	10.0397	9.95075					29	29	3	8.8	48207	323.31	38567000000	243	430	16
713	5.899	799381	Q1	O60888-3;O60888;O60888-2;C9IZG4;C9IZQ5	O60888-3;O60888;O60888-2;C9IZG4	Protein CutA	CUTA	5.94618	5.91884	5.83255	3.15185	3.10911	3.0325	9.5717	9.54435	9.45806					6	6	6	56.4	16832	197.2	17926000000	79	156	5.5
714	5.899	797688	Q1	P26885;F5H0N4	P26885;F5H0N4	Peptidyl-prolyl cis-trans isomerase FKBP2;Peptidyl-prolyl cis-trans isomerase	FKBP2	5.90701	5.90256	5.88731	3.11267	3.09282	3.08726	9.57031	9.56586	9.55061					13	13	13	72.5	15649	133.86	13709000000	123	142	6
715	5.897	793188	Q1	A0A1W2PPZ5;P23193;A0A1W2PRL9;P23193-2;E5RIS7;B7Z4S1;E5RJ93;E5RK46;A0A1W2PS15;E5RFI1;A0A1W2PPV7;O75764	A0A1W2PPZ5;P23193;A0A1W2PRL9;P23193-2	Transcription elongation factor A protein 1	TCEA1	5.86105	5.87526	5.9557	3.06672	3.06553	3.15565	9.95032	9.96453	10.045					32	32	28	71.1	33935	323.31	39803000000	302	301	16
716	5.897	792573	Q1	Q14566	Q14566	DNA replication licensing factor MCM6	MCM6	5.89638	5.87659	5.91872	3.10205	3.06686	3.11867	10.4628	10.443	10.4851					59	59	59	68.7	92888	323.31	115810000000	500	821	48
717	5.897	790169	Q1	Q9UBT2;Q9UBT2-2;K7EPL2;K7ESK7;U3KQ93;U3KQ55;K7ES38	Q9UBT2;Q9UBT2-2	SUMO-activating enzyme subunit 2	UBA2	5.87058	5.88576	5.93425	3.07625	3.07602	3.1342	10.1871	10.2023	10.2508					42	42	42	66.2	71223	323.31	70894000000	383	640	27
718	5.896	789898	Q1	P13804;H0YLU7;P13804-2;H0YK49;H0YNX6;H0YKF0;H0YL12;H0YL83;J3KN60;H0YM12	P13804;H0YLU7;P13804-2;H0YK49;H0YNX6;H0YKF0;H0YL12	Electron transfer flavoprotein subunit alpha, mitochondrial	ETFA	5.9208	5.8794	5.88705	3.12647	3.06967	3.087	10.0612	10.0198	10.0275					19	19	19	73.6	35079	323.31	46276000000	179	333	18
719	5.895	787274	Q1	O60493;O60493-2;O60493-3	O60493;O60493-2;O60493-3	Sorting nexin-3	SNX3	5.91326	5.90306	5.86811	3.11893	3.09333	3.06806	9.7015	9.6913	9.65635					17	17	3	25.9	18762	182.84	17051000000	90	162	8
720	5.893	785662	Q1	Q9UG63;Q9UG63-2;C9JHK9;C9JZV3	Q9UG63;Q9UG63-2;C9JHK9;C9JZV3	ATP-binding cassette sub-family F member 2	ABCF2	5.86659	5.89091	5.92241	3.07226	3.08118	3.12237	10.1497	10.174	10.2055					44	44	44	66.3	71289	323.31	64456000000	412	623	25
721	5.892	783263	Q1	Q14232;F5H0D0;Q14232-2;H0YGG4	Q14232;F5H0D0;Q14232-2;H0YGG4	Translation initiation factor eIF-2B subunit alpha	EIF2B1	5.86988	5.89158	5.91524	3.07555	3.08185	3.11519	9.79642	9.81813	9.84178					26	26	26	73.8	33712	323.31	24882000000	182	305	11
722	5.892	783205	Q1	Q05519-2;Q5T760;B4DWT1;S4R3C4	Q05519-2;Q5T760	Serine/arginine-rich splicing factor 11	SRSF11	5.94513	5.88774	5.84266	3.1508	3.078	3.04262	9.85147	9.79408	9.749					17	17	1	3.3	53413	301.51	20565000000	118	483	10.5
723	5.89	782907	Q1	P46976-2;P46976;C9JQ42;G5E9W8;P46976-3;C9J8R8;C9J7C7	P46976-2;P46976;C9JQ42;G5E9W8;P46976-3	Glycogenin-1	GYG1	5.82269	5.88823	5.95944	3.02836	3.0785	3.15939	9.78702	9.85257	9.92377					16	16	16	52	37478	316.54	31664000000	158	333	12
724	5.89	780962	Q1	Q9UK76;J3KT51;Q9UK76-2;Q9UK76-3;J3KSH8;F2Z3M5	Q9UK76;J3KT51;Q9UK76-2;Q9UK76-3	Hematological and neurological expressed 1 protein;Hematological and neurological expressed 1 protein, N-terminally processed	HN1	5.9428	5.83789	5.88903	3.14847	3.02816	3.08899	9.67305	9.56814	9.61928					9	9	9	79.9	16014	276.1	21136000000	53	154	7
725	5.89	779868	Q1	Q92598;Q92598-2;Q92598-4;Q92598-3;A0A0A0MSM0;Q5TBM3;R4GN69	Q92598;Q92598-2;Q92598-4;Q92598-3;A0A0A0MSM0	Heat shock protein 105 kDa	HSPH1	5.84579	5.88597	5.93777	3.05145	3.07624	3.13772	10.403	10.4432	10.495					66	63	62	74.4	96864	323.31	122930000000	576	858	47
726	5.89	778895	Q1	Q99986;H0YJ50;H0YJJ9	Q99986;H0YJ50	Serine/threonine-protein kinase VRK1	VRK1	5.92183	5.85141	5.89567	3.1275	3.04168	3.09563	10.0111	9.94068	9.98494					32	32	31	61.1	45476	323.31	35366000000	242	396	16
727	5.889	777328	Q1	O14980;C9JKM9;C9J673;C9IZS4;C9JQ02;C9JV99;F8WF71;C9IYM2;H7BZC5;C9JF49	O14980	Exportin-1	XPO1	5.90556	5.88864	5.8737	3.11123	3.0789	3.07366	10.515	10.4981	10.4831					56	56	56	61.1	123380	323.31	131970000000	575	1071	53
728	5.889	777265	Q1	J3KQ32;Q9NTK5;Q9NTK5-3;Q9NTK5-2;C9JCJ9;C9JTK6	J3KQ32;Q9NTK5;Q9NTK5-3;Q9NTK5-2	Obg-like ATPase 1	OLA1	5.84538	5.89646	5.92568	3.05105	3.08673	3.12563	10.0827	10.1338	10.163					37	37	37	79.6	46937	323.31	54258000000	293	416	22.5
729	5.889	777017	Q1	C9J406;H7C463	C9J406;H7C463		IMMT	5.85212	5.89434	5.92066	3.05779	3.0846	3.12061	10.3393	10.3816	10.4079					64	64	2	2.1	73253	323.31	95643000000	478	659	40
730	5.889	776502	Q1	Q9UNM6;A0A087WUL9;Q9UNM6-2;J3KNQ3;E9PL38;H0YD73;E9PQG3;E9PPD2;F8W8J6	Q9UNM6;A0A087WUL9;Q9UNM6-2;J3KNQ3;E9PL38	26S proteasome non-ATPase regulatory subunit 13	PSMD13	5.92137	5.9028	5.84239	3.12704	3.09307	3.04234	10.2215	10.2029	10.1425					30	30	30	84.3	42945	323.31	62416000000	231	376	26
731	5.889	776158	Q1	P78527;P78527-2;F5GX40;H0YG84	P78527;P78527-2	DNA-dependent protein kinase catalytic subunit	PRKDC	5.86643	5.90302	5.89679	3.0721	3.09329	3.09675	11.091	11.1276	11.1214					290	290	290	66.5	469080	323.31	533460000000	2480	4128	218.5
732	5.888	775345	Q1	P50213;H0YL72;P50213-2;H0YMU3;H0YLI6;H0YKD0;H0YNF5;H0YM64;H0YM46;Q68D72;H0YLF8;H0YNF8;H0YL05	P50213;H0YL72;P50213-2;H0YMU3;H0YLI6	Isocitrate dehydrogenase [NAD] subunit alpha, mitochondrial	IDH3A	5.87713	5.86843	5.91865	3.0828	3.0587	3.1186	9.9664	9.9577	10.0079					21	21	21	51.6	39591	323.31	39328000000	203	366	16
733	5.887	774535	Q1	P31350;P31350-2;C9JXC1	P31350;P31350-2;C9JXC1	Ribonucleoside-diphosphate reductase subunit M2	RRM2	5.91679	5.90837	5.83558	3.12246	3.09863	3.03554	10.1637	10.1552	10.0825					41	41	36	75.8	44877	323.31	58600000000	335	389	23
734	5.886	773800	Q1	P37268;E9PNM1;A0A1W2PQ47;P37268-2;P37268-3;P37268-4;P37268-5;E9PS69;E9PJG4;E9PQ90;E9PNJ2;E9PSH1	P37268;E9PNM1;A0A1W2PQ47;P37268-2;P37268-3;P37268-4;P37268-5	Squalene synthase	FDFT1	5.87799	5.92739	5.85312	3.08365	3.11766	3.05307	10.0184	10.0678	9.99354					29	29	29	62.4	48115	323.31	45361000000	237	417	18
735	5.886	773417	Q1	J3KR44;Q96FW1;F5GYN4;F5H6Q1;F5GYJ8;F5H3F0;Q96FW1-2	J3KR44;Q96FW1;F5GYN4;F5H6Q1;F5GYJ8;F5H3F0	Ubiquitin thioesterase OTUB1	OTUB1	5.87096	5.9037	5.88202	3.07662	3.09397	3.08197	9.9322	9.96494	9.94326					15	15	15	79	31440	323.31	32577000000	145	272	15
736	5.885	771386	Q1	P29692-4;E9PK06	P29692-4			5.86139	5.88542	5.90785	3.06706	3.07569	3.1078	9.89267	9.9167	9.93913					33	2	1	11.1	29070	41.661	23612000000	14	262	14
737	5.885	768730	Q1	Q9BV40;B8ZZT4;C9JXZ5	Q9BV40;B8ZZT4	Vesicle-associated membrane protein 8	VAMP8	5.83796	5.83074	5.98496	3.04363	3.02101	3.18491	9.50127	9.49404	9.64826					9	9	9	59	11438	85.012	18869000000	51	100	6
738	5.883	768360	Q1	P49755;G3V2K7	P49755	Transmembrane emp24 domain-containing protein 10	TMED10	5.82784	5.9137	5.90887	3.0335	3.10396	3.10883	9.79217	9.87803	9.8732					14	14	14	51.1	24976	156.95	28497000000	114	219	12
739	5.883	767895	Q1	P14550;Q5T621;V9GYP9;V9GYG2	P14550;Q5T621	Alcohol dehydrogenase [NADP(+)]	AKR1A1	5.86996	5.89688	5.88256	3.07563	3.08715	3.08251	9.9726	9.99951	9.98519					20	20	20	80.9	36573	290.92	36989000000	149	325	16.5
740	5.882	767741	Q1	Q9P0L0;J3QKM9	Q9P0L0	Vesicle-associated membrane protein-associated protein A	VAPA	5.81568	5.88773	5.94386	3.02135	3.07799	3.14381	9.84696	9.919	9.97513					23	23	2	8.4	27893	305.24	34832000000	247	249	14
741	5.881	764316	Q1	Q16630-2;F8WJN3;Q16630-3;Q16630;F8W084	Q16630-2;F8WJN3;Q16630-3;Q16630	Cleavage and polyadenylation specificity factor subunit 6	CPSF6	5.83631	5.91142	5.89549	3.04198	3.10169	3.09544	9.93895	10.0141	9.99812					22	22	22	33	63470	323.31	41312000000	181	588	16.5
742	5.879	762536	Q1	P50579;P50579-3;G3V1U3;F8VSC4	P50579;P50579-3;G3V1U3	Methionine aminopeptidase 2	METAP2	5.89937	5.8464	5.89079	3.10504	3.03667	3.09075	10.1269	10.074	10.1184					33	33	3	5.2	52891	323.31	54706000000	384	478	22
743	5.878	760612	Q1	Q9NP97;B1AKR6;Q8TF09;H3BQI1;H3BNG9;H3BPA0;Q7Z4M1;Q9NP97-2	Q9NP97;B1AKR6	Dynein light chain roadblock-type 1	DYNLRB1	5.85159	5.90989	5.87215	3.05726	3.10015	3.0721	9.58184	9.64013	9.6024					8	8	8	86.5	10921	86.067	19237000000	89	96	7
744	5.878	759759	Q1	O43447;C9JQD4;O43447-2;H0YEL5;A6NM32	O43447;C9JQD4;O43447-2;H0YEL5	Peptidyl-prolyl cis-trans isomerase H;Peptidyl-prolyl cis-trans isomerase	PPIH	5.85469	5.858	5.92074	3.06035	3.04827	3.1207	9.69408	9.6974	9.76014					18	18	18	85.3	19208	254.61	21413000000	157	177	9
745	5.877	757648	Q1	P30405;R4GN99;P30405-2;H0Y548	P30405	Peptidyl-prolyl cis-trans isomerase F, mitochondrial	PPIF	5.84452	5.86409	5.92386	3.05019	3.05435	3.12382	9.77107	9.79063	9.85041					14	13	13	66.7	22040	323.31	25589000000	92	207	11
746	5.877	756890	Q1	P32322;E2QRB3;P32322-3;P32322-2;J3KQ22;J3QL24;J3QLK9;J3QL32;J3QKT4;J3QL23;J3QRZ0;J3KTA8;J3QKT3;J3QR88;J3KSA9	P32322;E2QRB3;P32322-3;P32322-2;J3KQ22;J3QL24	Pyrroline-5-carboxylate reductase 1, mitochondrial;Pyrroline-5-carboxylate reductase	PYCR1	5.81668	5.88809	5.92539	3.02235	3.07836	3.12535	9.84796	9.91937	9.95667					17	16	16	59.6	33360	323.31	33309000000	175	319	14
747	5.876	756642	Q1	Q15428;K7EMT0	Q15428	Splicing factor 3A subunit 2	SF3A2	5.79375	5.88251	5.95152	2.99941	3.07278	3.15147	9.82502	9.91379	9.9828					25	25	25	41.4	49255	323.31	37206000000	233	464	14
748	5.876	756519	Q1	Q9UN86-2	Q9UN86-2	Ras GTPase-activating protein-binding protein 2	G3BP2	5.83093	5.92366	5.873	3.0366	3.11393	3.07296	9.99484	10.0876	10.0369					27	22	1	4.5	50817	323.31	44004000000	194	449	19
749	5.875	756047	Q1	Q9Y221;Q9Y221-2;J3QLW7;J3QRD6;J3QRR4	Q9Y221;Q9Y221-2;J3QLW7	60S ribosome subunit biogenesis protein NIP7 homolog	NIP7	5.87313	5.91634	5.83625	3.0788	3.1066	3.0362	9.71252	9.75573	9.67564					15	15	15	86.1	20462	323.31	21176000000	136	180	9
750	5.874	754268	Q1	A0A087WV05;Q99417;A0A0D9SEI7	A0A087WV05;Q99417	C-Myc-binding protein	MYCBP	5.8756	5.815	5.9319	3.08127	3.00527	3.13186	9.63582	9.57521	9.69211					10	10	10	69.1	12755	225.86	16532000000	72	110	7.5
751	5.873	753717	Q1	P00374;B4DM58;P00374-2;C9JJ68;Q86XF0	P00374;B4DM58;P00374-2	Dihydrofolate reductase	DHFR	5.94437	5.87713	5.79782	3.15003	3.0674	2.99778	9.82952	9.76228	9.68298					20	20	20	87.7	21452	257.89	24738000000	160	187	10
752	5.872	752981	Q1	P27694;I3L4R8;I3L524;I3L2M5	P27694;I3L4R8	Replication protein A 70 kDa DNA-binding subunit;Replication protein A 70 kDa DNA-binding subunit, N-terminally processed	RPA1	5.86739	5.82064	5.92876	3.07306	3.0109	3.12872	10.095	10.0482	10.1563					42	42	42	61.4	68137	323.31	52396000000	281	616	22
753	5.872	752444	Q1	P48444;B0YIW6;P48444-2;Q6P1Q5;E9PK34	P48444;B0YIW6;P48444-2	Coatomer subunit delta	ARCN1	5.8037	5.89833	5.91473	3.00936	3.0886	3.11468	10.1202	10.2148	10.2312					42	42	42	64.8	57210	323.31	65111000000	410	511	27
754	5.872	749785	Q1	Q9NVI7-2;Q9NVI7;H0Y2W2;Q9NVI7-3;Q5SV16	Q9NVI7-2;Q9NVI7;H0Y2W2;Q9NVI7-3	ATPase family AAA domain-containing protein 3A	ATAD3A	5.83359	5.88215	5.90097	3.03926	3.07242	3.10092	10.2306	10.2792	10.298					49	49	12	22.9	66217	323.31	75411000000	419	586	32.5
755	5.872	749081	Q1	P23921;E9PL69;E9PP77;H0YCY7	P23921;E9PL69	Ribonucleoside-diphosphate reductase large subunit	RRM1	5.89999	5.86249	5.85376	3.10565	3.05276	3.05371	10.3533	10.3158	10.3071					45	45	45	72.6	90069	323.31	88199000000	417	792	37
756	5.871	748331	Q1	P15927;P15927-2;P15927-3;Q5TEJ7;Q5TEJ0	P15927;P15927-2;P15927-3;Q5TEJ7	Replication protein A 32 kDa subunit	RPA2	5.86601	5.84151	5.90675	3.07168	3.03178	3.1067	9.75116	9.72666	9.7919					13	13	13	83.7	29247	323.31	23486000000	198	270	10
757	5.871	746717	Q1	P00387-2;P00387;P00387-3;B1AHF3	P00387-2;P00387;P00387-3;B1AHF3	NADH-cytochrome b5 reductase 3;NADH-cytochrome b5 reductase 3 membrane-bound form;NADH-cytochrome b5 reductase 3 soluble form	CYB5R3	5.79685	5.91369	5.90246	3.00251	3.10396	3.10241	9.81233	9.92917	9.91794					21	21	21	70.5	31628	323.31	31067000000	175	278	13.5
758	5.871	746161	Q1	Q8WUM4-2	Q8WUM4-2	Programmed cell death 6-interacting protein	PDCD6IP	5.84733	5.87654	5.88807	3.053	3.06681	3.08803	10.4137	10.4429	10.4545					67	67	1	1.6	96771	323.31	107370000000	512	873	48
759	5.87	746001	Q1	P04181;P04181-2	P04181;P04181-2	Ornithine aminotransferase, mitochondrial;Ornithine aminotransferase, hepatic form;Ornithine aminotransferase, renal form	OAT	5.81266	5.86458	5.93261	3.01833	3.05485	3.13256	9.92826	9.98018	10.0482					27	27	27	79.3	48534	323.31	40357000000	222	439	17
760	5.869	745670	Q1	P42167;G5E972;P42167-3	P42167;G5E972;P42167-3	Lamina-associated polypeptide 2, isoforms beta/gamma;Thymopoietin;Thymopentin	TMPO	5.80307	5.86728	5.9377	3.00873	3.05755	3.13766	9.98925	10.0535	10.1239					37	20	8	16.1	50670	323.31	40754000000	133	454	20
761	5.868	745384	Q1	Q9NUQ9;E5RI16;A0A1W2PRQ0;E5RJL8;A0A087X178;Q9NUQ9-2;E5RJE1;E5RIR8;E5RGI7;E5RFS4;E5RHU5;E5RK61;E5RK81;E5RH75;Q9H0Q0	Q9NUQ9;E5RI16	Protein FAM49B	FAM49B	5.88878	5.84731	5.86796	3.09444	3.03758	3.06792	9.9353	9.89383	9.91448					23	23	23	69.8	36748	323.31	33855000000	175	324	14.5
762	5.867	745183	Q1	P62714;E5RHC1;H0YC23;E7ESG8;E5RFI3;E5RHP4;H0YBN9;E5RJX4	P62714;E5RHC1	Serine/threonine-protein phosphatase 2A catalytic subunit beta isoform;Serine/threonine-protein phosphatase	PPP2CB	5.89701	5.93235	5.77197	3.10267	3.12262	2.97193	9.84285	9.8782	9.71782					22	22	2	6.8	35575	323.31	28142000000	158	309	11.5
763	5.866	742992	Q1	Q99798;A2A274	Q99798;A2A274	Aconitate hydratase, mitochondrial	ACO2	5.82643	5.88608	5.88607	3.03209	3.07635	3.08602	10.297	10.3567	10.3567					47	47	47	69.2	85424	323.31	82459000000	479	780	38.5
764	5.866	738493	Q1	P38117;P38117-2;M0QY67	P38117;P38117-2;M0QY67	Electron transfer flavoprotein subunit beta	ETFB	5.86005	5.86179	5.87626	3.06571	3.05206	3.07621	9.89133	9.89307	9.90753					25	25	25	84.7	27843	323.31	31141000000	162	255	14
765	5.866	736356	Q1	Q5U5X0;D6R994	Q5U5X0	Complex III assembly factor LYRM7	LYRM7	5.74314	5.83504	6.01884	2.9488	3.0253	3.2188	9.10541	9.19731	9.38111					5	5	5	47.1	11955	93.633	5606300000	32	104	3
766	5.862	734673	Q1	P60983;G3V4P8;G3V3X4	P60983;G3V4P8	Glia maturation factor beta	GMFB	5.82602	5.89582	5.86351	3.03168	3.08609	3.06346	9.68889	9.75869	9.72639					15	15	12	78.9	16713	323.31	21303000000	102	142	9.5
767	5.86	729664	Q1	Q01813;Q01813-2;B1APP6;B1APP8;H0Y757;Q5VSR5;V9GY25;V9GYV7;H0Y3Y3	Q01813;Q01813-2	ATP-dependent 6-phosphofructokinase, platelet type	PFKP	5.83042	5.88759	5.86156	3.03609	3.07786	3.06151	10.2341	10.2913	10.2652					44	44	40	57.8	85595	323.31	76247000000	347	784	33
768	5.859	729239	Q1	P33552	P33552	Cyclin-dependent kinases regulatory subunit 2	CKS2	5.90883	5.85762	5.81169	3.1145	3.04788	3.01164	9.39604	9.34483	9.2989					6	5	5	64.6	9860.2	156.81	10985000000	51	79	4
769	5.859	728982	Q1	Q14240;Q14240-2;E7EQG2;J3KSN7;E7EMV8;E9PBH4;C9JUF0;F8WE11	Q14240;Q14240-2;E7EQG2	Eukaryotic initiation factor 4A-II;Eukaryotic initiation factor 4A-II, N-terminally processed	EIF4A2	5.82787	5.89732	5.85277	3.03353	3.08759	3.05272	10.0747	10.1442	10.0997					42	23	23	60	46402	323.31	52058000000	283	407	23
770	5.859	726427	Q1	P40939;H0YFD6;P40939-2	P40939	Trifunctional enzyme subunit alpha, mitochondrial;Long-chain enoyl-CoA hydratase;Long chain 3-hydroxyacyl-CoA dehydrogenase	HADHA	5.89724	5.84624	5.8344	3.1029	3.03651	3.03436	10.3952	10.3442	10.3323					47	47	47	69.6	82999	323.31	92541000000	533	763	41
771	5.859	726134	Q1	E7EQ69;C9J5J3;C9JZU6	E7EQ69		NAA50	5.81002	5.91028	5.85695	3.01569	3.10055	3.0569	9.73656	9.83682	9.78349					14	14	1	8.3	19311	150.66	24302000000	90	168	11
772	5.858	725244	Q1	Q9Y3I0	Q9Y3I0	tRNA-splicing ligase RtcB homolog	RTCB	5.83047	5.84563	5.89938	3.03614	3.0359	3.09933	10.0958	10.111	10.1647					34	34	34	71.9	55210	323.31	56464000000	300	505	24
773	5.858	724895	Q1	P05204	P05204	Non-histone chromosomal protein HMG-17	HMGN2	5.8248	5.86416	5.88412	3.03046	3.05443	3.08407	9.01098	9.05034	9.0703					9	9	6	53.3	9392.6	299.54	4183300000	132	90	2
774	5.855	724702	Q1	O43252;O95340;O95340-2	O43252	Bifunctional 3-phosphoadenosine 5-phosphosulfate synthase 1;Sulfate adenylyltransferase;Adenylyl-sulfate kinase	PAPSS1	5.86536	5.85117	5.84822	3.07103	3.04144	3.04817	10.269	10.2548	10.2519					45	45	45	82.2	70832	323.31	79824000000	505	624	33
775	5.854	723623	Q1	Q9NS69	Q9NS69	Mitochondrial import receptor subunit TOM22 homolog	TOMM22	5.94967	5.88313	5.72783	3.15534	3.0734	2.92778	9.67992	9.61338	9.45808					9	9	9	78.9	15521	323.31	15452000000	113	142	7
776	5.853	722161	Q1	O00505;H0Y4S9	O00505	Importin subunit alpha-4	KPNA3	5.79746	5.87705	5.8844	3.00313	3.06732	3.08435	9.91306	9.99265	10					27	27	18	44.3	57810	323.31	36758000000	212	521	17
777	5.853	721747	Q1	Q9P2J5;Q9P2J5-2;Q9P2J5-3;A0A087WXY1	Q9P2J5;Q9P2J5-2	Leucine--tRNA ligase, cytoplasmic	LARS	5.85316	5.88147	5.82362	3.05883	3.07174	3.02357	10.5236	10.5519	10.4941					83	83	83	70.1	134460	323.31	138940000000	718	1176	61
778	5.853	718154	Q1	Q14847;Q14847-2;C9J9W2;Q14847-3;F6S2S5;K7ESD6;J3KSN1;O76041-2	Q14847;Q14847-2;C9J9W2;Q14847-3	LIM and SH3 domain protein 1	LASP1	5.89801	5.88657	5.77351	3.10368	3.07683	2.97347	9.86235	9.8509	9.73784					20	20	20	69	29717	298.91	27595000000	182	261	12
779	5.853	716112	Q1	A2ACR1;P28065-2;P28065;A0A0G2JJA7;A2ACR0;A0A0G2JJQ0;A0A0G2JJ13;A0A0G2JHI2	A2ACR1;P28065-2;P28065;A0A0G2JJA7;A2ACR0	Proteasome subunit beta type;Proteasome subunit beta type-9	PSMB9	5.85375	5.8098	5.8945	3.05942	3.00007	3.09446	9.7389	9.69496	9.77965					11	11	11	64.8	20960	161.9	21934000000	81	196	10
780	5.851	715676	Q1	H0UI06;P14406;D6R9C3;D6RIE3;D6RGV5	H0UI06;P14406;D6R9C3;D6RIE3;D6RGV5	Cytochrome c oxidase subunit 7A2, mitochondrial	COX7A2	5.76755	5.82796	5.9581	2.97322	3.01823	3.15805	9.25477	9.31517	9.44531					3	3	3	40.9	12844	14.996	8296500000	16	115	4
781	5.851	714596	Q1	Q13451;Q13451-2	Q13451	Peptidyl-prolyl cis-trans isomerase FKBP5;Peptidyl-prolyl cis-trans isomerase FKBP5, N-terminally processed	FKBP5	5.85906	5.82523	5.8692	3.06473	3.0155	3.06915	10.2066	10.1728	10.2167					36	36	36	72.6	51212	323.31	66592000000	334	457	29
782	5.85	714437	Q1	A6NMQ3;Q5T5H1;O43768-2;O43768;O43768-9;O43768-3;O43768-4;A0A1W2PRU0;O43768-8;O43768-6;O43768-5;O43768-7	A6NMQ3;Q5T5H1;O43768-2;O43768;O43768-9;O43768-3;O43768-4;A0A1W2PRU0;O43768-8;O43768-6;O43768-5;O43768-7	Alpha-endosulfine	ENSA	5.77613	5.87418	5.89928	2.98179	3.06445	3.09923	9.61552	9.71357	9.73867					13	13	12	50.7	15634	323.31	22764000000	106	140	9
783	5.85	714015	Q1	O00762;O00762-2;O00762-3;O00762-4;A0A087WVK1;A0A0A0MSE8;K4DI81	O00762;O00762-2;O00762-3;O00762-4	Ubiquitin-conjugating enzyme E2 C	UBE2C	5.80914	5.93313	5.80729	3.01481	3.1234	3.00724	9.67201	9.796	9.67016					14	14	14	94.4	19652	285.33	22352000000	111	179	9.5
784	5.85	713496	Q1	P17812;P17812-2	P17812;P17812-2	CTP synthase 1	CTPS1	5.87873	5.84174	5.82851	3.08439	3.03201	3.02846	10.1618	10.1248	10.1116					39	39	37	70.4	66690	323.31	52698000000	262	591	25
785	5.85	712899	Q1	Q8NHW5	Q8NHW5	60S acidic ribosomal protein P0-like	RPLP0P6	5.98846	5.83178	5.72842	3.19413	3.02204	2.92837	10.0197	9.86305	9.7597					15	3	1	4.1	34364	56.248	24054000000	34	317	14
786	5.849	710504	Q1	P05114;A6NEL0;F2Z2W6;F2Z2Y5;H7BXJ5;A6NL93	P05114;A6NEL0;F2Z2W6;F2Z2Y5;H7BXJ5	Non-histone chromosomal protein HMG-14	HMGN1	5.79823	5.90138	5.84753	3.0039	3.09165	3.04749	8.68338	8.78653	8.73268					7	7	7	61	10659	147.77	2269100000	39	100	1
787	5.848	709728	Q1	Q7L1Q6;Q7L1Q6-4;Q7L1Q6-3;Q7L1Q6-2;C9IZ80;C9JFN4;C9J188;C9JWF5;H0Y503;C9JV57	Q7L1Q6;Q7L1Q6-4;Q7L1Q6-3;Q7L1Q6-2;C9IZ80	Basic leucine zipper and W2 domain-containing protein 1	BZW1	5.85773	5.84744	5.83906	3.0634	3.0377	3.03901	10.1408	10.1305	10.1221					36	34	34	78.8	48043	319.97	54760000000	265	419	25
788	5.847	708243	Q1	P67870;Q5SRQ6;Q5SRQ3;N0E472;A0A0G2JM12;N0E644;A0A0G2JM58	P67870;Q5SRQ6;Q5SRQ3;N0E472;A0A0G2JM12	Casein kinase II subunit beta	CSNK2B;CSNK2B-LY6G5B-1181;CSNK2B-LY6G5B--991	5.79995	5.89081	5.85108	3.00562	3.08108	3.05103	9.68511	9.77596	9.73623					9	9	9	54.4	24942	286.86	23039000000	86	215	10
789	5.847	706098	Q1	Q9Y6C9	Q9Y6C9	Mitochondrial carrier homolog 2	MTCH2	5.79864	5.85895	5.88379	3.0043	3.04921	3.08374	9.82991	9.89022	9.91507					16	16	5	11.9	33331	323.31	29322000000	145	303	14
790	5.847	705628	Q1	Q13867;J3KSD8;K7ES02;K7ESE8;J3KS79;K7ENH5;K7EMJ3	Q13867;J3KSD8;K7ES02;K7ESE8	Bleomycin hydrolase	BLMH	5.84297	5.86366	5.83342	3.04863	3.05393	3.03337	9.93224	9.95293	9.92269					39	39	39	78	52562	323.31	37610000000	269	455	16
791	5.847	705134	Q1	O14745;O14745-2;J3QRP6;J3QRA3	O14745;O14745-2	Na(+)/H(+) exchange regulatory cofactor NHE-RF1	SLC9A3R1	5.81037	5.85914	5.87026	3.01604	3.04941	3.07022	9.913	9.96177	9.9729					28	28	28	79.1	38868	271.47	35256000000	151	358	16.5
792	5.846	704926	Q1	P55084-2;P55084;F5GZQ3;B5MD38;C9JEY0;C9JE81;C9K0M0	P55084-2;P55084;F5GZQ3;B5MD38	Trifunctional enzyme subunit beta, mitochondrial;3-ketoacyl-CoA thiolase	HADHB	5.84031	5.89056	5.80708	3.04598	3.08083	3.00703	10.0965	10.1468	10.0633					38	38	38	74.8	48879	323.31	52649000000	299	452	23.5
793	5.845	704414	Q1	Q14141;B1AMS2;Q14141-2;Q14141-4;Q14141-3	Q14141;B1AMS2;Q14141-2;Q14141-4	Septin-6	2017-09-06	5.7987	5.82399	5.91357	3.00436	3.01426	3.11352	9.98488	10.0102	10.0998					33	18	18	48.8	49716	323.31	41151000000	153	434	20
794	5.845	703653	Q1	P06730;P06730-2;D6RBW1;P06730-3;H0Y8J7;D6RFJ3;D6RHE2;H0Y8X3;A6NMX2	P06730;P06730-2;D6RBW1;P06730-3	Eukaryotic translation initiation factor 4E	EIF4E	5.83692	5.88077	5.81696	3.04258	3.07104	3.01692	9.81898	9.86284	9.79902					13	13	13	63.6	25097	143.73	25287000000	108	217	12.5
795	5.845	703633	Q1	Q9Y5L4;K7EIT2	Q9Y5L4;K7EIT2	Mitochondrial import inner membrane translocase subunit Tim13	TIMM13	5.82564	5.95955	5.74946	3.03131	3.14982	2.94941	9.45116	9.58507	9.37497					7	7	7	77.9	10500	113.99	14078000000	77	95	5.5
796	5.844	702856	Q1	Q8NFX7-2;Q8NFX7;Q8NFX7-3;F8VZZ2	Q8NFX7-2;Q8NFX7	Syntaxin-binding protein 6	STXBP6	5.84695	5.88988	5.79594	3.05262	3.08015	2.9959	9.77349	9.81643	9.72249					15	15	15	77.6	23587	323.31	26161000000	104	210	11
797	5.843	701394	Q1	Q02750;Q02750-2;H3BRW9	Q02750;Q02750-2	Dual specificity mitogen-activated protein kinase kinase 1	MAP2K1	5.81212	5.80016	5.91602	3.01778	2.99043	3.11598	9.95254	9.94058	10.0564					30	30	20	68.2	43439	323.31	41187000000	231	393	18
798	5.842	701382	Q1	O00154-4;O00154-6;O00154-7;O00154;O00154-5;K7EKP8;O00154-2;O00154-3	O00154-4;O00154-6;O00154-7;O00154;O00154-5;K7EKP8;O00154-2;O00154-3	Cytosolic acyl coenzyme A thioester hydrolase	ACOT7	5.78875	5.81564	5.9218	2.99442	3.00591	3.12176	9.91694	9.94383	10.05					20	20	19	70.1	37419	323.31	38755000000	201	338	17.5
799	5.842	701374	Q1	Q9BRA2;I3L2R6;I3L0K2;I3L3M7	Q9BRA2;I3L2R6;I3L0K2;I3L3M7	Thioredoxin domain-containing protein 17	TXNDC17	5.90729	5.79226	5.82618	3.11296	2.98252	3.02614	9.5328	9.41777	9.45169					10	10	10	78	13941	142.21	10857000000	61	123	5.5
800	5.839	700986	Q1	Q13526;K7EN45;K7EMU7;O15428	Q13526;K7EN45;K7EMU7	Peptidyl-prolyl cis-trans isomerase NIMA-interacting 1	PIN1	5.85628	5.80573	5.85467	3.06195	2.996	3.05462	9.74143	9.69088	9.73982					11	11	11	76.7	18243	323.31	25291000000	134	163	10
801	5.839	699251	Q1	Q9UHY7;D6RA00;A0A0C4DGY8;Q9UHY7-2	Q9UHY7;D6RA00;A0A0C4DGY8;Q9UHY7-2	Enolase-phosphatase E1	ENOPH1	5.78862	5.86109	5.86641	2.99428	3.05136	3.06637	9.67377	9.74624	9.75156					14	14	14	66.7	28932	321.36	17469000000	97	261	10
802	5.838	694734	Q1	Q96DI7;Q96DI7-2;Q9NSS8	Q96DI7;Q96DI7-2	U5 small nuclear ribonucleoprotein 40 kDa protein	SNRNP40	5.82173	5.86558	5.82794	3.02739	3.05585	3.02789	9.911	9.95485	9.91721					26	26	26	90.5	39310	323.31	32452000000	190	357	16
803	5.838	693879	Q1	Q99829;B0QZ18;F2Z2V0;A6PVH9;E7ENH5;Q5JX58;Q5JX59;Q5JX60;Q5JX44;Q5JX56;Q5JX45;Q5JX55;Q5JX61;Q5JX52;Q5JX54;Q5JX57;E7EV27;H0Y524;Q5JX53	Q99829;B0QZ18;F2Z2V0;A6PVH9;E7ENH5;Q5JX58;Q5JX59;Q5JX60;Q5JX44;Q5JX56;Q5JX45;Q5JX55;Q5JX61;Q5JX52	Copine-1	CPNE1	5.76245	5.89931	5.85275	2.96811	3.08958	3.0527	9.68899	9.82585	9.77929					27	27	27	57.7	59058	323.31	22489000000	190	537	11
804	5.836	692037	Q1	P31323	P31323	cAMP-dependent protein kinase type II-beta regulatory subunit	PRKAR2B	5.81403	5.82331	5.87054	3.01969	3.01358	3.0705	10.0214	10.0307	10.0779					26	26	23	79.9	46302	323.31	47294000000	288	418	21
805	5.836	691065	Q1	Q99460;A0A087WW66;Q99460-2;H7C378;C9J9M4;H7BZR6;F8WCE3	Q99460;A0A087WW66;Q99460-2	26S proteasome non-ATPase regulatory subunit 1	PSMD1	5.80591	5.8467	5.85511	3.01158	3.03696	3.05507	10.3632	10.4039	10.4124					67	67	67	79.5	105840	323.31	100260000000	582	953	47
806	5.836	690002	Q1	Q86UX7-2;Q86UX7;F5H1C6;H0YFT5;F5H3I6;G3V1L6;Q9BQL6-3;Q9BQL6	Q86UX7-2;Q86UX7;F5H1C6	Fermitin family homolog 3	FERMT3	5.81999	5.82497	5.86161	3.02566	3.01523	3.06156	10.2849	10.2899	10.3265					52	52	52	76.6	75429	323.31	76032000000	398	663	38
807	5.835	688746	Q1	Q14699;G3XAJ6;C9JHG2;C9JRN3;C9JWQ9;F8WAR1;U3KPZ2	Q14699;G3XAJ6;C9JHG2	Raftlin	RFTN1	5.8032	5.80434	5.89835	3.00887	2.9946	3.09831	10.0863	10.0874	10.1814					36	36	36	69	63145	323.31	56029000000	314	578	25
808	5.835	688077	Q1	K7ELL7;P14314-2;P14314;K7EPW7;A0A0C4DGP4;K7EKX1;K7EJ70;K7EIP3	K7ELL7;P14314-2;P14314	Glucosidase 2 subunit beta	PRKCSH	5.79223	5.88249	5.83035	2.9979	3.07275	3.0303	9.97841	10.0687	10.0165					27	27	27	48.4	60192	315.69	44747000000	204	535	20
809	5.834	686552	Q1	Q92499;F1T0B3;A0A087X2G1;Q92499-3;Q92499-2	Q92499;F1T0B3;A0A087X2G1;Q92499-3;Q92499-2	ATP-dependent RNA helicase DDX1	DDX1	5.8337	5.88277	5.78524	3.03937	3.07303	2.9852	10.2986	10.3477	10.2502					50	50	50	70.5	82431	323.31	75539000000	422	740	38
810	5.833	686445	Q1	P62310	P62310	U6 snRNA-associated Sm-like protein LSm3	LSM3	5.83077	5.76697	5.9012	3.03644	2.95723	3.10115	9.19304	9.12924	9.26347					5	5	5	50	11845	72.288	7317200000	41	102	3
811	5.833	686184	Q1	Q15029-2;Q15029;Q15029-3;K7EP67;K7EIT3;K7EIV5	Q15029-2;Q15029;Q15029-3	116 kDa U5 small nuclear ribonucleoprotein component	EFTUD2	5.84166	5.8277	5.82928	3.04732	3.01796	3.02923	10.4344	10.4204	10.422					63	61	56	72.4	105380	323.31	105150000000	524	937	51
812	5.833	686171	Q1	O00232;O00232-2;J3KTJ5;J3KSK1	O00232;O00232-2	26S proteasome non-ATPase regulatory subunit 12	PSMD12	5.81229	5.87666	5.80954	3.01796	3.06692	3.0095	10.0866	10.151	10.0839					35	35	35	70.4	52904	323.31	55507000000	306	456	24.5
813	5.833	685366	Q1	Q9Y3C8	Q9Y3C8	Ubiquitin-fold modifier-conjugating enzyme 1	UFC1	5.81588	5.89553	5.78686	3.02155	3.0858	2.98681	9.60412	9.68378	9.57509					13	13	13	62.9	19458	137.91	16116000000	78	167	8
814	5.833	685057	Q1	Q99757;M0QXH0;F8WDN2	Q99757;M0QXH0	Thioredoxin, mitochondrial	TXN2	5.86968	5.6729	5.95501	3.07535	2.86317	3.15497	9.4952	9.29842	9.58052					7	7	7	52.4	18383	105.18	9621700000	45	166	5.5
815	5.83	684268	Q1	P20042	P20042	Eukaryotic translation initiation factor 2 subunit 2	EIF2S2	5.81305	5.82233	5.85521	3.01872	3.0126	3.05517	9.99923	10.0085	10.0414					41	41	41	84.7	38388	323.31	46051000000	302	333	20
816	5.829	682268	Q1	Q9Y2L1;Q9Y2L1-2;G3V1J5;F2Z2C0	Q9Y2L1;Q9Y2L1-2;G3V1J5;F2Z2C0	Exosome complex exonuclease RRP44	DIS3	5.83894	5.86927	5.77797	3.04461	3.05953	2.97792	10.3725	10.4028	10.3115					66	66	65	66.9	109000	323.31	89867000000	527	958	44.5
817	5.827	680648	Q1	O14744;O14744-2;O14744-5;O14744-3;O14744-4;H0YJX6;G3V580;G3V2L6;G3V5L5;G3V2X6;C9JSX3;H0YJ77;G3V5T6;H0YJD3;H7BZ44;G3V507;G3V2F5;H0YJY6	O14744;O14744-2;O14744-5;O14744-3;O14744-4	Protein arginine N-methyltransferase 5;Protein arginine N-methyltransferase 5, N-terminally processed	PRMT5	5.80951	5.83804	5.83295	3.01518	3.02831	3.0329	10.186	10.2145	10.2095					40	40	40	79.3	72683	323.31	64243000000	366	637	31
818	5.827	676984	Q1	P47755;F8W9N7;A0A0D9SET8;C9JUG7;P47755-2;F8WED3	P47755;F8W9N7;A0A0D9SET8;C9JUG7;P47755-2	F-actin-capping protein subunit alpha-2	CAPZA2	5.79681	5.88082	5.80222	3.00248	3.07108	3.00217	9.63621	9.72021	9.64161					16	13	13	68.2	32949	323.31	17054000000	97	286	9
819	5.826	676651	Q1	P09669	P09669	Cytochrome c oxidase subunit 6C	COX6C	5.76581	5.74685	5.96603	2.97148	2.93712	3.16599	9.25302	9.23406	9.45324					8	8	8	53.3	8781.3	10.511	9471400000	37	75	4
820	5.825	675366	Q1	Q9NTJ3;E9PD53;Q9NTJ3-2;C9JR83;C9J9E4;C9J578;C9JVD8;C9JWF0;C9IYK2;C9JJ64;F8WCB7	Q9NTJ3;E9PD53;Q9NTJ3-2	Structural maintenance of chromosomes protein 4;Structural maintenance of chromosomes protein	SMC4	5.82713	5.80788	5.83965	3.03279	2.99815	3.03961	10.5574	10.5381	10.5699					106	106	106	74.5	147180	323.31	138630000000	936	1288	70
821	5.825	673514	Q1	Q9Y678;H0Y8X7;D6RG17;H0Y8G2	Q9Y678	Coatomer subunit gamma-1	COPG1	5.77751	5.84603	5.8503	2.98318	3.03629	3.05026	10.3529	10.4214	10.4256					71	71	65	79.4	97717	323.31	98034000000	614	874	49
822	5.824	671445	Q1	Q9Y490	Q9Y490	Talin-1	TLN1	5.79841	5.83251	5.84073	3.00408	3.02278	3.04068	10.8074	10.8415	10.8497					167	167	150	72.3	269760	323.31	280750000000	1454	2541	133
823	5.823	670047	Q1	Q16666;Q16666-2;Q16666-6;Q16666-3;A0A0A0MRB1;H3BR88;H3BM18;X6RHM1;H3BVE6;X6RHR0;Q6K0P9-6;Q6K0P9-5;Q6K0P9-4;Q6K0P9-3;Q6K0P9-2;Q6K0P9;H3BR65	Q16666;Q16666-2;Q16666-6;Q16666-3	Gamma-interferon-inducible protein 16	IFI16	5.8397	5.83469	5.79545	3.04537	3.02496	2.99541	10.2751	10.2701	10.2308					48	48	48	64.3	88255	323.31	70173000000	396	785	35.5
824	5.823	669685	Q1	A0A087WY55;Q9NP79;Q5TGM0;Q9NP79-2	A0A087WY55;Q9NP79;Q5TGM0;Q9NP79-2	Vacuolar protein sorting-associated protein VTA1 homolog	VTA1	5.80248	5.81623	5.85032	3.00815	3.00649	3.05028	9.66536	9.6791	9.7132					15	15	15	56.4	31102	323.31	19543000000	110	280	9.5
825	5.822	668473	Q1	H3BTL1;Q9GZQ8;A6NCE7;H3BTE7;Q9H492;Q9H492-2	H3BTL1;Q9GZQ8;A6NCE7	Microtubule-associated proteins 1A/1B light chain 3B;Microtubule-associated proteins 1A/1B light chain 3 beta 2	MAP1LC3B;MAP1LC3B2	5.82672	5.79634	5.84403	3.03239	2.98661	3.04399	9.31393	9.28355	9.33124					5	5	5	62.7	9011.5	15.092	7345200000	32	75	4
826	5.822	667946	Q1	A0A024R1R8;Q9Y2S6	A0A024R1R8;Q9Y2S6	Translation machinery-associated protein 7	hCG_2014768;TMA7	5.88564	5.7638	5.81614	3.09131	2.95406	3.01609	9.16873	9.04688	9.09923					2	2	2	15.6	7091.3	4.2043	5005700000	23	64	2.5
827	5.821	667216	Q1	Q96CT7;M0R2F5	Q96CT7;M0R2F5	Coiled-coil domain-containing protein 124	CCDC124	5.79406	5.80238	5.86568	2.99972	2.99265	3.06564	9.63345	9.64177	9.70508					20	20	20	64.1	25835	323.31	17536000000	136	223	9
828	5.82	666391	Q1	Q9Y3B4	Q9Y3B4	Splicing factor 3B subunit 6	SF3B6	5.79421	5.91896	5.74645	2.99988	3.10923	2.9464	9.58245	9.7072	9.53469					7	7	7	59.2	14585	115.01	14585000000	49	125	8
829	5.819	666008	Q1	P11388;P11388-2;P11388-3;P11388-4;J3KTB7;J3QR57	P11388;P11388-2;P11388-3;P11388-4	DNA topoisomerase 2-alpha	TOP2A	5.82763	5.79296	5.8362	3.0333	2.98323	3.03615	10.6292	10.5946	10.6378					107	107	90	57.7	174380	323.31	169580000000	956	1531	82.5
830	5.817	664983	Q1	R4GMR5;P48556;K7EJR3;K7EJC1;K7ERW6;K7ENY6	R4GMR5;P48556;K7EJR3	26S proteasome non-ATPase regulatory subunit 8	PSMD8	5.78591	5.82457	5.84197	2.99158	3.01484	3.04192	9.90151	9.94017	9.95757					19	19	19	71.8	32551	323.31	31224000000	168	287	17
831	5.817	663594	Q1	P28062;X5D2R7;Q5JNW7;A0A140T998;P28062-2	P28062;X5D2R7;Q5JNW7;A0A140T998;P28062-2	Proteasome subunit beta type-8;Proteasome subunit beta type	PSMB8;PSM8	5.81389	5.85855	5.7776	3.01956	3.04882	2.97756	9.92949	9.97415	9.8932					21	21	21	85.1	30354	323.31	35880000000	152	276	17
832	5.816	659681	Q1	P16885;A0A0A0MRF9;H3BQV5;H3BPZ3	P16885;A0A0A0MRF9	1-phosphatidylinositol 4,5-bisphosphate phosphodiesterase gamma-2;Phosphoinositide phospholipase C	PLCG2	5.80472	5.82118	5.82217	3.01038	3.01145	3.02212	10.535	10.5514	10.5524					102	102	101	75	147870	323.31	137640000000	774	1265	70
833	5.815	659674	Q1	P62875	P62875	DNA-directed RNA polymerases I, II, and III subunit RPABC5	POLR2L	5.81645	5.7431	5.88663	3.02211	2.93337	3.08659	9.17872	9.10537	9.2489					6	6	6	91	7645	25.317	6201300000	46	67	3
834	5.814	658895	Q1	O75534;O75534-4;E9PLD4;E9PKN4	O75534;O75534-4	Cold shock domain-containing protein E1	CSDE1	5.79805	5.81906	5.82633	3.00372	3.00932	3.02628	10.346	10.367	10.3742					64	64	3	7.3	88884	323.31	87025000000	416	798	46
835	5.814	657823	Q1	P35250;P35250-2;A0A087WVY3;H7C5P4;F8WC37;H7C5G4;H7C596;H7C5Q7;H7C5A0;H7C5P1;H7C5S7;F8WDC9	P35250;P35250-2;A0A087WVY3	Replication factor C subunit 2	RFC2	5.79833	5.85802	5.78433	3.00399	3.04829	2.98429	10.0057	10.0654	9.9917					25	25	25	78.8	39157	323.31	40162000000	189	354	21
836	5.813	657575	Q1	P36871;P36871-2;P36871-3	P36871;P36871-2;P36871-3	Phosphoglucomutase-1	PGM1	5.778	5.83105	5.83031	2.98366	3.02132	3.03027	10.1946	10.2477	10.2469					39	39	39	82.9	61448	323.31	73830000000	437	562	34
837	5.813	655018	Q1	P14854;K7EQD3	P14854	Cytochrome c oxidase subunit 6B1	COX6B1	5.7945	5.7556	5.88784	3.00017	2.94587	3.08779	9.52475	9.48585	9.61809					7	7	7	75.6	10192	109.48	15397000000	42	86	7
838	5.813	654776	Q1	P14678-2;P14678;P14678-3;J3QLE5;P63162;P63162-2;J3KRY3;S4R3P3	P14678-2;P14678;P14678-3;J3QLE5;P63162;P63162-2	Small nuclear ribonucleoprotein-associated proteins B and B;Small nuclear ribonucleoprotein-associated protein N	SNRPB;SNRPN	5.87781	5.85266	5.70726	3.08347	3.04293	2.90721	9.96707	9.94193	9.79653					11	11	11	32.9	23656	125.58	32080000000	104	231	16
839	5.81	652760	Q1	P54920;M0R0Y2;M0R2M1;M0R058;M0R0I4;M0R213;M0R027;M0QZM9;M0QZN5;M0R031	P54920;M0R0Y2;M0R2M1	Alpha-soluble NSF attachment protein	NAPA	5.79769	5.80872	5.82302	3.00335	2.99899	3.02297	9.88696	9.89799	9.91229					26	26	23	78.3	33232	323.31	33242000000	232	295	16
840	5.81	652595	Q1	Q96IX5	Q96IX5	Up-regulated during skeletal muscle growth protein 5	USMG5	5.82607	5.8214	5.78162	3.03173	3.01166	2.98157	9.18834	9.18367	9.14389					4	4	4	44.8	6457.5	100.57	4810200000	14	58	3
841	5.809	651358	Q1	Q9NPJ3;Q9NPJ3-2	Q9NPJ3;Q9NPJ3-2	Acyl-coenzyme A thioesterase 13;Acyl-coenzyme A thioesterase 13, N-terminally processed	ACOT13	5.82291	5.79525	5.80828	3.02858	2.98551	3.00824	9.36127	9.33361	9.34665					10	10	10	75.7	14960	76.576	9268900000	60	140	4.5
842	5.807	645872	Q1	Q3ZCM7;A0A075B736;Q5SQY0	Q3ZCM7;A0A075B736;Q5SQY0	Tubulin beta-8 chain	TUBB8	5.76484	5.80774	5.84968	2.97051	2.998	3.04963	9.90526	9.94816	9.9901					14	2	2	11	49775	210.98	32758000000	37	444	18
843	5.806	645553	Q1	A0A0C4DFU2;P04179;P04179-4;F5H4R2;F5GYZ5;F5H3C5;A0A0C4DFU1;P04179-2;A0A0C4DG56;P04179-3;G8JLJ2;G5E9P6;F5GXZ9	A0A0C4DFU2;P04179;P04179-4;F5H4R2;F5GYZ5;F5H3C5;A0A0C4DFU1;P04179-2;A0A0C4DG56;P04179-3	Superoxide dismutase;Superoxide dismutase [Mn], mitochondrial	SOD2	5.75531	5.85947	5.80445	2.96098	3.04974	3.00441	9.5947	9.69887	9.64385					14	14	14	66.2	24750	311.6	16405000000	102	222	9
844	5.806	644827	Q1	O60869;O60869-2;O60869-3	O60869;O60869-2;O60869-3	Endothelial differentiation-related factor 1	EDF1	5.73779	5.81776	5.86358	2.94346	3.00803	3.06353	9.62294	9.70291	9.74873					14	14	14	54.7	16368	211.77	18370000000	108	148	10
845	5.806	644111	Q1	Q9BT78;D6RFN0;D6RAX7;Q9BT78-2;D6RD63;D6REK7	Q9BT78;D6RFN0;D6RAX7;Q9BT78-2;D6RD63	COP9 signalosome complex subunit 4	COPS4	5.74856	5.82471	5.84461	2.95422	3.01498	3.04457	9.99543	10.0716	10.0915					32	32	32	91.4	46268	323.31	43516000000	295	406	23
846	5.806	643870	Q1	Q92882	Q92882	Osteoclast-stimulating factor 1	OSTF1	5.82096	5.77596	5.82091	3.02663	2.96623	3.02086	9.78529	9.74029	9.78524					15	15	15	73.8	23787	179.25	21281000000	114	214	12
847	5.805	643426	Q1	O00425;O00425-2;F8WD15;F8W930;Q9Y6M1-5;Q9Y6M1-6;Q9Y6M1-3;Q9Y6M1-4;Q9Y6M1-1;Q9Y6M1	O00425;O00425-2	Insulin-like growth factor 2 mRNA-binding protein 3	IGF2BP3	5.78662	5.80818	5.82024	2.99229	2.99845	3.02019	9.96181	9.98337	9.99542					32	30	30	49.4	63704	323.31	36660000000	217	579	19.5
848	5.804	643328	Q1	P63000;P63000-2	P63000;P63000-2	Ras-related C3 botulinum toxin substrate 1	RAC1	5.79635	5.8646	5.75078	3.00201	3.05487	2.95074	9.61092	9.67917	9.56535					10	5	3	15.1	21450	33.613	19935000000	127	192	8.5
849	5.803	642530	Q1	Q00688;G3V5F2	Q00688	Peptidyl-prolyl cis-trans isomerase FKBP3	FKBP3	5.81288	5.73363	5.86261	3.01855	2.9239	3.06257	9.69803	9.61878	9.74776					16	16	16	59.4	25177	323.31	17552000000	122	224	10
850	5.802	640404	Q1	Q15102;M0R389;M0R1K3;M0QZT2;M0QXS6;M0R323	Q15102;M0R389;M0R1K3;M0QZT2	Platelet-activating factor acetylhydrolase IB subunit gamma	PAFAH1B3	5.83372	5.8136	5.76006	3.03939	3.00387	2.96001	9.79805	9.77793	9.72439					18	18	18	97	25734	323.31	21787000000	134	231	12
851	5.802	640394	Q1	P31947;P31947-2	P31947;P31947-2	14-3-3 protein sigma	SFN	5.69624	5.85786	5.85262	2.90191	3.04813	3.05258	9.75748	9.91911	9.91387					12	9	9	54.4	27774	49.101	25817000000	46	248	15
852	5.8	640098	Q1	P37198;M0QXN5;M0QX10;M0QYY0;M0QX13;M0QZL5;M0R1S1;M0QX64;M0R302	P37198;M0QXN5	Nuclear pore glycoprotein p62	NUP62	5.796	5.77614	5.82936	3.00166	2.96641	3.02931	9.65887	9.63902	9.69223					14	14	14	41	53254	323.31	19204000000	111	522	9.5
853	5.8	638611	Q1	P47985	P47985	Cytochrome b-c1 complex subunit Rieske, mitochondrial;Cytochrome b-c1 complex subunit 11	UQCRFS1	5.81513	5.79978	5.7853	3.02079	2.99004	2.98525	9.84641	9.83106	9.81658					14	14	4	18.2	29668	166.24	30064000000	171	274	14
854	5.8	636149	Q1	O60884;A0A087WT48;I3L320	O60884	DnaJ homolog subfamily A member 2	DNAJA2	5.78124	5.81962	5.79851	2.98691	3.00989	2.99846	10.0088	10.0472	10.0261					30	30	30	71.4	45745	323.31	38077000000	288	412	22
855	5.8	635635	Q1	O14530;O14530-2;B8ZZX4;F8WCJ3;F8WBV5;G3XAJ4	O14530;O14530-2;B8ZZX4;F8WCJ3	Thioredoxin domain-containing protein 9	TXNDC9	5.81543	5.84638	5.73707	3.02109	3.03665	2.93703	9.6783	9.70925	9.59995					21	21	21	75.7	26534	323.31	17041000000	170	226	9.5
856	5.8	634698	Q1	O60264	O60264	SWI/SNF-related matrix-associated actin-dependent regulator of chromatin subfamily A member 5	SMARCA5	5.8007	5.80235	5.79558	3.00637	2.99261	2.99553	10.4262	10.4279	10.4211					93	93	67	54.5	121900	323.31	112230000000	615	1052	55
857	5.798	633897	Q1	Q16563-2;C9JYN0;Q16563;H7C4J8;A0A0U1RQT9	Q16563-2;C9JYN0;Q16563	Synaptophysin-like protein 1	SYPL1	5.75944	5.86596	5.76849	2.9651	3.05623	2.96844	9.64459	9.75111	9.65364					7	7	7	29	26411	134.44	16816000000	115	241	10
858	5.798	632494	Q1	Q9H8S9;Q9H8S9-2	Q9H8S9;Q9H8S9-2	MOB kinase activator 1A	MOB1A	5.80816	5.79025	5.79421	3.01383	2.98052	2.99416	9.5964	9.57849	9.58245					10	10	2	15.7	25079	204.44	14484000000	88	216	8
859	5.797	631978	Q1	P42574;A8MVM1;C9JXR7	P42574;A8MVM1	Caspase-3;Caspase-3 subunit p17;Caspase-3 subunit p12	CASP3	5.80897	5.79099	5.7919	3.01463	2.98126	2.99186	9.75481	9.73684	9.73775					26	26	26	82.7	31608	323.31	22462000000	200	277	11.5
860	5.797	631305	Q1	P07954-2;P07954	P07954-2;P07954	Fumarate hydratase, mitochondrial	FH	5.79734	5.78898	5.80505	3.00301	2.97925	3.005	10.0717	10.0633	10.0794					29	29	29	75.6	50212	323.31	49309000000	240	467	24.5
861	5.795	631067	Q1	P04792;F8WE04;C9J3N8	P04792	Heat shock protein beta-1	HSPB1	5.71096	5.7613	5.91156	2.91663	2.95156	3.11151	9.74224	9.79257	9.94284					17	17	17	93.2	22782	323.31	24834000000	123	205	14
862	5.795	630309	Q1	Q9UI08-2;Q9UI08-5;G3V3G2;G3V535;A0A087WYI2	Q9UI08-2;Q9UI08-5			5.78404	5.81046	5.7893	2.9897	3.00073	2.98925	9.98094	10.0074	9.9862					39	39	1	2.6	44791	323.31	40349000000	277	418	20.5
863	5.794	627491	Q1	P32519;A0A0U1RRL5;P32519-2;Q5T9E7;A0A0D9SG85;A0A087WU18;Q99607	P32519;A0A0U1RRL5;P32519-2	ETS-related transcription factor Elf-1	ELF1	5.78909	5.82386	5.76907	2.99475	3.01413	2.96902	9.97527	10.01	9.95525					24	24	23	55.6	67497	323.31	37171000000	236	619	20
864	5.794	627142	Q1	Q9Y2X3;H7BZ72;F8WED0	Q9Y2X3	Nucleolar protein 58	NOP58	5.82764	5.75467	5.79865	3.03331	2.94494	2.9986	10.093	10.02	10.064					34	34	34	65	59578	323.31	50272000000	365	529	24
865	5.793	627099	Q1	Q92979;V9GYP5;A0A087WWQ2;A0A087WVM7	Q92979;V9GYP5;A0A087WWQ2;A0A087WVM7	Ribosomal RNA small subunit methyltransferase NEP1	EMG1	5.84429	5.79171	5.7429	3.04996	2.98198	2.94286	9.82635	9.77377	9.72496					19	19	19	83.6	26720	217.4	25398000000	159	244	12.5
866	5.792	626863	Q1	P55036;H0Y3Y9	P55036	26S proteasome non-ATPase regulatory subunit 4	PSMD4	5.73524	5.77727	5.86468	2.94091	2.96754	3.06463	9.76652	9.80855	9.89596					17	17	2	6.9	40736	307.62	27512000000	130	377	14
867	5.791	624872	Q1	Q9BQ15;C9JT95;C9JMP5;F8WAF5;Q9BQ15-2;Q96AH0-2	Q9BQ15;C9JT95;C9JMP5	SOSS complex subunit B1	NABP2	5.80993	5.75724	5.80474	3.0156	2.94751	3.0047	9.54018	9.48749	9.53499					6	6	4	38.4	22338	36.27	11629000000	18	211	7
868	5.79	623653	Q1	Q9ULV4;Q9ULV4-2;Q9ULV4-3;B4E3S0;H0YHL7;F8W1H8;F8VUX3;F8VSA4;F8VRE9;F8VTT6;F8VVB7;F8VV53;J3QLV6;J3KSS5;Q6QEF8-4;Q6QEF8-3;Q6QEF8-2;Q6QEF8-5;Q6QEF8	Q9ULV4;Q9ULV4-2;Q9ULV4-3;B4E3S0;H0YHL7	Coronin-1C;Coronin	CORO1C	5.76417	5.76925	5.83735	2.96984	2.95952	3.03731	9.92807	9.93316	10.0013					38	37	36	59.5	53248	323.31	33684000000	274	474	19
869	5.79	623374	Q1	K7EM38;J3KT65;F8WCH0	K7EM38;J3KT65		ACTG1	5.9482	5.91059	5.51137	3.15386	3.10085	2.71132	9.89405	9.85643	9.45721					15	4	2	15	14522	83.736	33362000000	132	133	11.5
870	5.789	623278	Q1	P04818;P04818-2;P04818-3	P04818;P04818-2;P04818-3	Thymidylate synthase	TYMS	5.72276	5.80341	5.84133	2.92842	2.99367	3.04128	9.72185	9.8025	9.84042					24	24	24	70.9	35716	323.31	24481000000	200	313	13
871	5.789	623160	Q1	P56381;Q5VTU8	P56381;Q5VTU8	ATP synthase subunit epsilon, mitochondrial;ATP synthase subunit epsilon-like protein, mitochondrial	ATP5E;ATP5EP2	5.71593	5.71192	5.93904	2.9216	2.90219	3.13899	9.0782	9.07419	9.30131					4	4	4	51	5779.7	6.4643	5639100000	10	51	3
872	5.789	619341	Q1	P11177;P11177-3;P11177-2;C9J634;F8WF02	P11177;P11177-3;P11177-2;C9J634	Pyruvate dehydrogenase E1 component subunit beta, mitochondrial	PDHB	5.79595	5.83235	5.73747	3.00162	3.02262	2.93742	9.97113	10.0075	9.91265					19	19	19	65.5	39233	323.31	38451000000	200	359	19.5
873	5.788	618817	Q1	P61163;R4GMT0;A0A1B0GVS3	P61163;R4GMT0	Alpha-centractin	ACTR1A	5.80933	5.8041	5.75119	3.01499	2.99437	2.95114	9.97323	9.96801	9.91509					30	30	17	49.5	42613	323.31	35655000000	231	376	19
874	5.787	618412	Q1	P00846	P00846	ATP synthase subunit a	MT-ATP6	5.82943	5.87805	5.6541	3.0351	3.06832	2.85405	9.01561	9.06423	8.84028					1	1	1	4.4	24817	4.6832	3412200000	7	226	2
875	5.786	617064	Q1	P41240;H3BUM9;H3BU69;H3BN15;K7ENL8;K7ES68;K7EQY5;P42679-3;P42679;P42679-2	P41240	Tyrosine-protein kinase CSK	CSK	5.74691	5.82224	5.78968	2.95258	3.0125	2.98963	10.0792	10.1546	10.122				+	35	35	35	79.1	50704	323.31	54349000000	219	450	28
876	5.785	616111	Q1	P62136;P62136-3;E9PMD7;F5H1L6;F5H037	P62136;P62136-3;E9PMD7	Serine/threonine-protein phosphatase PP1-alpha catalytic subunit;Serine/threonine-protein phosphatase	PPP1CA	5.75466	5.80246	5.79843	2.96033	2.99273	2.99838	9.84393	9.89173	9.8877					25	12	1	3.3	37512	120.36	30774000000	107	330	16
877	5.784	615158	Q1	Q13951-2;J3KTD8	Q13951-2	Core-binding factor subunit beta	CBFB	5.7042	5.79018	5.85784	2.90987	2.98045	3.05779	9.49244	9.57842	9.64608					21	21	4	14.4	21991	323.31	14666000000	123	187	8
878	5.784	614583	Q1	H7BXD5;P28676;H7C2Z6;C9JIZ3;C9JWQ8;C9JV47	H7BXD5;P28676;H7C2Z6	Grancalcin	GCA	5.80633	5.82254	5.72173	3.012	3.01281	2.92169	9.69148	9.70769	9.60689					14	14	14	58.1	22109	170.46	20260000000	102	198	10
879	5.783	614317	Q1	P35754	P35754	Glutaredoxin-1	GLRX	5.72271	5.74684	5.87886	2.92838	2.93711	3.07882	9.30683	9.33096	9.46298					6	6	6	78.3	11776	231.14	9065100000	57	106	5
880	5.783	612866	Q1	Q8WUH6	Q8WUH6	Transmembrane protein 263	TMEM263	5.80734	5.78283	5.75745	3.01301	2.9731	2.9574	9.47065	9.44613	9.42075					7	7	7	84.5	11748	130.73	11266000000	79	116	6
881	5.78	610566	Q1	P14598;A6NI72;A8MVU1;P14598-2;A0A087X1W0	P14598;A6NI72;A8MVU1	Neutrophil cytosol factor 1;Putative neutrophil cytosol factor 1B;Putative neutrophil cytosol factor 1C	NCF1;NCF1B;NCF1C	5.739	5.81193	5.79044	2.94467	3.0022	2.99039	10.0044	10.0773	10.0558					31	31	24	55.4	44651	323.31	42812000000	288	390	24
882	5.78	610545	Q1	O15400-2;O15400	O15400-2;O15400	Syntaxin-7	STX7	5.7515	5.79225	5.79576	2.95717	2.98251	2.99572	9.65784	9.69859	9.7021					15	15	15	77	27400	323.31	18986000000	134	239	10.5
883	5.779	606762	Q1	E7EM64;Q7L5N1;H7C3T0	E7EM64;Q7L5N1	COP9 signalosome complex subunit 6	COPS6	5.81174	5.77746	5.74642	3.0174	2.96773	2.94637	9.77607	9.74179	9.71075					15	15	15	56.7	36064	323.31	21244000000	124	326	12
884	5.777	605986	Q1	O75475;O75475-2	O75475;O75475-2	PC4 and SFRS1-interacting protein	PSIP1	5.77757	5.78719	5.766	2.98323	2.97746	2.96595	10.0149	10.0245	10.0033					31	31	15	28.5	60103	323.31	42926000000	238	530	22.5
885	5.775	604677	Q1	Q9NZL9;Q9NZL9-3;H7C0X7;E5RJR3;Q9NZL9-5	Q9NZL9;Q9NZL9-3;H7C0X7	Methionine adenosyltransferase 2 subunit beta	MAT2B	5.73438	5.78896	5.80118	2.94005	2.97923	3.00114	9.73348	9.78805	9.80028					21	21	2	7.2	37551	323.31	22471000000	152	334	13
886	5.773	602971	Q1	O75396;A0A087X1A9	O75396	Vesicle-trafficking protein SEC22b	SEC22B	5.70634	5.83945	5.77271	2.912	3.02971	2.97266	9.73761	9.87073	9.80398					15	15	15	52.6	24593	321.21	28839000000	109	215	14
887	5.772	601670	Q1	P19784;H3BSA1;H3BV19;H3BNI9	P19784;H3BSA1;H3BV19	Casein kinase II subunit alpha	CSNK2A2	5.75938	5.72223	5.83378	2.96504	2.91249	3.03374	9.68592	9.64877	9.76032					28	28	28	73.7	41213	323.31	18991000000	192	350	11
888	5.772	598419	Q1	Q08J23;Q08J23-3;A0A140T9Y7	Q08J23;Q08J23-3	tRNA (cytosine(34)-C(5))-methyltransferase	NSUN2	5.73205	5.80211	5.78044	2.93771	2.99237	2.9804	10.1912	10.2613	10.2396					57	57	6	5.3	86470	323.31	67109000000	457	767	37.5
889	5.771	597342	Q1	Q96RP9;Q96RP9-2;C9IZ01;F8WAU4;C9JA25	Q96RP9;Q96RP9-2;C9IZ01;F8WAU4	Elongation factor G, mitochondrial	GFM1	5.74939	5.76038	5.80253	2.95506	2.95064	3.00249	10.2086	10.2196	10.2617					51	51	51	71.5	83471	323.31	69198000000	413	751	37.5
890	5.771	596761	Q1	Q8WXX5	Q8WXX5	DnaJ homolog subfamily C member 9	DNAJC9	5.77384	5.77526	5.76307	2.97951	2.96553	2.96302	9.77294	9.77436	9.76216					19	19	19	69.2	29909	323.31	21406000000	137	260	13
891	5.77	594705	Q1	P54105;E9PMI6;J3KN38;E9PJF4	P54105;E9PMI6;J3KN38;E9PJF4	Methylosome subunit pICln	CLNS1A	5.84685	5.84308	5.62157	3.05252	3.03334	2.82152	9.5771	9.57332	9.35182					8	8	6	56.1	26215	178.1	12091000000	69	237	7
892	5.77	592732	Q1	O00193;E9PM92;E9PRZ9;E9PQA1	O00193;E9PM92;E9PRZ9	Small acidic protein	SMAP;C11orf58	5.80332	5.72856	5.77666	3.00899	2.91883	2.97662	9.38744	9.31269	9.36078					7	7	7	41	20332	323.31	10114000000	68	183	5
893	5.769	592255	Q1	P78406;E9PQ57;E9PPG9;B0QZ36;B0QZ37	P78406;E9PQ57;E9PPG9	mRNA export factor	RAE1	5.74167	5.8077	5.75716	2.94734	2.99797	2.95711	9.74077	9.8068	9.75625					20	20	20	84.5	40968	323.31	25586000000	148	368	13
894	5.769	590715	Q1	P04844;P04844-2;Q5JYR7;Q5JYR4;F2Z3K5;Q5JYR3;H0Y5M1	P04844;P04844-2	Dolichyl-diphosphooligosaccharide--protein glycosyltransferase subunit 2	RPN2	5.68079	5.82167	5.80308	2.88645	3.01194	3.00304	9.94615	10.087	10.0685					35	35	35	63.7	69283	323.31	44274000000	324	631	24
895	5.768	590604	Q1	P61026;A0A087WWB9;P59190-2;P59190	P61026	Ras-related protein Rab-10	RAB10	5.71159	5.75719	5.83591	2.91726	2.94746	3.03586	9.71068	9.75629	9.835					16	15	13	60.5	22541	153.91	23620000000	126	200	13
896	5.767	589873	Q1	P35606;P35606-2;D6R997;H0Y938;H0YAC7;D6RBT6;D6RBZ7;D6RCL6;D6RBG7	P35606;P35606-2	Coatomer subunit beta	COPB2	5.76701	5.76717	5.76699	2.97267	2.95743	2.96694	10.3379	10.3381	10.3379					61	61	61	80	102490	323.31	79088000000	458	906	48.5
897	5.767	589670	Q1	Q13126;B4DUC8;Q13126-4;Q13126-3;Q13126-2;J3QSB7;Q13126-7;Q13126-6;Q13126-5;F2Z2F3;F8WES2;J3KRN1	Q13126;B4DUC8;Q13126-4;Q13126-3;Q13126-2;J3QSB7;Q13126-7;Q13126-6;Q13126-5	S-methyl-5-thioadenosine phosphorylase;Purine nucleoside phosphorylase	MTAP	5.7487	5.75905	5.79286	2.95436	2.94932	2.99282	9.93488	9.94523	9.97904					22	22	22	89	31236	323.31	35921000000	154	283	20
898	5.766	588531	Q1	J3KN29;O00233;F5H5V4;F5GX23;O00233-2;F5H7X1;F5H169;O00233-3	J3KN29;O00233;F5H5V4;F5GX23;O00233-2;F5H7X1;F5H169	26S proteasome non-ATPase regulatory subunit 9	PSMD9	5.77111	5.77681	5.75104	2.97677	2.96708	2.95099	9.69765	9.70335	9.67758					12	12	12	43.2	24553	286.03	18281000000	80	222	11
899	5.765	585172	Q1	O95347;O95347-2;A0A0C4DGE5;Q5T821	O95347;O95347-2	Structural maintenance of chromosomes protein 2	SMC2	5.77325	5.76021	5.76295	2.97892	2.95048	2.96291	10.4543	10.4412	10.444					89	89	89	69.8	135650	323.31	117840000000	599	1197	62.5
900	5.764	584861	Q1	O75874;C9J4N6;C9JJE5;C9JLU6	O75874	Isocitrate dehydrogenase [NADP] cytoplasmic	IDH1	5.73374	5.82331	5.73594	2.9394	3.01357	2.9359	10.0168	10.1064	10.019					27	27	26	71.5	46659	323.31	46059000000	238	414	25
901	5.764	584059	Q1	A0A1B0GWJ0;A0A1B0GTJ7;P30566;A0A0A6YY92;P30566-2;A0A1B0GWF8;A0A096LNY6;A0A1B0GTG9;A0A096LNY5;A0A096LPA2;A0A096LNY4;A0A096LP92;B4DEP1;A0A096LP72;A0A096LP76;A0A1W2PRX2;V9GY96;A0A096LNT0	A0A1B0GWJ0;A0A1B0GTJ7;P30566;A0A0A6YY92;P30566-2;A0A1B0GWF8;A0A096LNY6;A0A1B0GTG9;A0A096LNY5	Adenylosuccinate lyase	ADSL	5.74327	5.73353	5.81436	2.94894	2.9238	3.01431	9.95064	9.9409	10.0217					31	31	31	63.8	54465	323.31	40333000000	278	480	21
902	5.76	583947	Q1	Q9NRF9	Q9NRF9	DNA polymerase epsilon subunit 3	POLE3	5.76556	5.73776	5.77773	2.97123	2.92803	2.97768	9.5538	9.526	9.56597					5	5	5	49	16859	118.81	13038000000	78	147	8
903	5.76	582783	Q1	G5EA30;Q92879-4;Q92879-2;Q92879-3;Q92879-6;Q92879;Q92879-5;E9PKU1;F5H0D8;E9PSH0;E9PQK4;F5H4Y5;E9PKA1;F5H3J7;V9GYD9	G5EA30;Q92879-4;Q92879-2;Q92879-3;Q92879-6;Q92879;Q92879-5;E9PKU1	CUGBP Elav-like family member 1	CELF1	5.75163	5.82014	5.70777	2.9573	3.0104	2.90772	9.8409	9.90941	9.79704					23	23	20	43.8	55142	323.31	32260000000	236	514	16
904	5.759	582424	Q1	P49903;P49903-4;P49903-2;P49903-3;Q5T5U6;Q5T5U7	P49903;P49903-4;P49903-2;P49903-3;Q5T5U6	Selenide, water dikinase 1	SEPHS1	5.76517	5.76618	5.747	2.97083	2.95645	2.94696	9.69171	9.69272	9.67355					16	16	16	70.7	42910	323.31	21333000000	169	392	11
905	5.759	578531	Q1	P40937;P40937-2;F5H5S0;C9JH72;E9PEP3;F5H0U6;F5H304	P40937;P40937-2	Replication factor C subunit 5	RFC5	5.75767	5.79209	5.72829	2.96334	2.98236	2.92825	9.99501	10.0294	9.96562					32	32	32	82.9	38496	323.31	41188000000	230	340	22.5
906	5.759	578509	Q1	Q53GQ0;A0A1B0GV93;A0A1B0GVY6;E9PI21;Q53GQ0-2	Q53GQ0;A0A1B0GV93;A0A1B0GVY6	Very-long-chain 3-oxoacyl-CoA reductase	HSD17B12	5.7843	5.73142	5.76195	2.98997	2.92169	2.9619	9.7834	9.73052	9.76104					15	15	15	54.8	34324	189.81	24060000000	134	312	13
907	5.759	576354	Q1	Q10567-2;Q10567;C9J1E7;H7C034	Q10567-2;Q10567;C9J1E7	AP-1 complex subunit beta-1	AP1B1	5.74715	5.78623	5.74296	2.95281	2.9765	2.94291	10.2758	10.3148	10.2716					59	59	1	1.7	103920	323.31	76029000000	413	942	44
908	5.759	576327	Q1	Q13561;Q13561-3;Q13561-2;H0YI98;F8W1I6;F8VW18;F8VX93;F8VRV7;H0YHL1;F8W0U6	Q13561;Q13561-3;Q13561-2;H0YI98;F8W1I6;F8VW18	Dynactin subunit 2	DCTN2	5.76028	5.74972	5.76604	2.96595	2.93999	2.966	9.90071	9.89014	9.90647					21	21	21	63.3	44230	323.31	29015000000	160	401	18
909	5.757	575621	Q1	Q9NX40;D6RG39;D6RIT9;Q9NX40-3;Q9NX40-2;Q9NX40-4;D6RDI5;D6RA54;D6RC55;D6R918;D6RBC5;D6RF07	Q9NX40;D6RG39;D6RIT9;Q9NX40-3;Q9NX40-2;Q9NX40-4	OCIA domain-containing protein 1	OCIAD1	5.68771	5.81972	5.76462	2.89337	3.00999	2.96458	9.47595	9.60796	9.55286					16	16	5	24.5	27626	97.68	13787000000	108	245	8
910	5.757	575126	Q1	O75368	O75368	SH3 domain-binding glutamic acid-rich-like protein	SH3BGRL	5.68631	5.73768	5.84712	2.89198	2.92795	3.04708	9.47455	9.52593	9.63536					11	11	11	82.5	12774	303.08	13522000000	59	114	8
911	5.757	574829	Q1	P16615;P16615-5;P16615-2;P16615-3;P16615-4;H7C5W9;J3QSY6;H3BVB2;A0A0C4DH86;H3BTW4	P16615;P16615-5;P16615-2;P16615-3;P16615-4;H7C5W9	Sarcoplasmic/endoplasmic reticulum calcium ATPase 2	ATP2A2	5.7086	5.76707	5.79533	2.91427	2.95734	2.99528	10.247	10.3054	10.3337					57	57	39	35.6	114760	323.31	80370000000	437	1042	45
912	5.754	574409	Q1	Q16633	Q16633	POU domain class 2-associating factor 1	POU2AF1	5.84528	5.71513	5.70226	3.05095	2.9054	2.90221	9.20755	9.0774	9.06453					5	5	5	21.5	27436	59.756	5593300000	56	256	3
913	5.752	574353	Q1	Q99598;C4P0D6;C4P0D8;Q5VVQ1;C4P0D4;Q9NRI2	Q99598;C4P0D6;C4P0D8	Translin-associated protein X	TSNAX;DISC1	5.74745	5.70104	5.80749	2.95311	2.89131	3.00745	9.74654	9.70013	9.80659					22	22	22	76.6	33112	323.31	25941000000	213	290	13
914	5.752	573764	Q1	P24752;H0YEL7;P24752-2;E9PRQ6;E9PKF3	P24752	Acetyl-CoA acetyltransferase, mitochondrial	ACAT1	5.73592	5.75364	5.76625	2.94159	2.94391	2.96621	9.9828	10.0005	10.0131					24	24	24	80.8	45199	323.31	39991000000	208	427	23
915	5.75	573436	Q1	P15531;P15531-2;E7ERL0;E5RHP0;C9K028	P15531;P15531-2;E7ERL0	Nucleoside diphosphate kinase A	NME1	5.99764	5.94652	5.30732	3.20331	3.13679	2.50728	9.83703	9.78591	9.14672					12	2	2	25	17149	42.249	26782000000	44	152	9
916	5.75	571668	Q1	P54886	P54886	Delta-1-pyrroline-5-carboxylate synthase;Glutamate 5-kinase;Gamma-glutamyl phosphate reductase	ALDH18A1	5.72886	5.76271	5.75791	2.93452	2.95298	2.95786	10.2672	10.3011	10.2963					47	47	1	4	87301	323.31	81671000000	428	795	45
917	5.75	568332	Q1	O43615;M0QXU7;M0QXM9;M0R301;M0R124	O43615;M0QXU7	Mitochondrial import inner membrane translocase subunit TIM44	TIMM44	5.73538	5.76537	5.74824	2.94105	2.95564	2.94819	9.98226	10.0122	9.99512					29	29	29	60	51355	249.76	38488000000	183	452	23
918	5.749	568317	Q1	Q9BWF3;E9PB51;Q9BWF3-4;D6R9K7;J3QRR5;Q9BWF3-3;Q9BWF3-2	Q9BWF3;E9PB51;Q9BWF3-4	RNA-binding protein 4	RBM4	5.7472	5.76928	5.73151	2.95287	2.95955	2.93147	9.83647	9.85856	9.82079					27	27	1	3.6	40313	323.31	25624000000	207	364	16
919	5.749	567791	Q1	P55735;P55735-2;P55735-4;P55735-3;A8MXL6;E7ERC8	P55735;P55735-2;P55735-4;P55735-3;A8MXL6	Protein SEC13 homolog	SEC13	5.721	5.86219	5.6636	2.92667	3.05246	2.86355	9.72009	9.86128	9.66269					17	17	17	69.3	35540	323.31	23649000000	123	322	13
920	5.749	567593	Q1	Q96DH6;B4DHE8;B4DM51;Q96DH6-3;J3QKT5;H0YHB7;O43347	Q96DH6;B4DHE8;B4DM51;Q96DH6-3	RNA-binding protein Musashi homolog 2	MSI2	5.72534	5.76338	5.75734	2.93101	2.95365	2.95729	9.58822	9.62626	9.62021					18	18	2	16.8	35196	323.31	15564000000	128	328	9.5
921	5.747	565090	Q1	P17900;H0YBY3;E5RJD0	P17900	Ganglioside GM2 activator;Ganglioside GM2 activator isoform short	GM2A	5.86086	5.68603	5.69355	3.06653	2.8763	2.8935	9.6491	9.47428	9.48179					9	9	9	45.6	20838	71.086	12819000000	61	193	8
922	5.746	562445	Q1	P53999;D6RC37;D6R970	P53999	Activated RNA polymerase II transcriptional coactivator p15	SUB1	5.7996	5.81205	5.62705	3.00527	3.00231	2.82701	9.38373	9.39616	9.21117					10	10	10	55.9	14395	69.242	9263000000	65	127	5
923	5.746	562131	Q1	P03928	P03928	ATP synthase protein 8	MT-ATP8	5.6392	5.85434	5.74365	2.84487	3.04461	2.9436	9.00147	9.21661	9.10592					4	4	4	52.9	7991.6	82.192	5307600000	79	68	3
924	5.745	561837	Q1	P61081;M0QX69;M0QYI6	P61081	NEDD8-conjugating enzyme Ubc12	UBE2M	5.72785	5.75558	5.75127	2.93351	2.94584	2.95123	9.65439	9.68212	9.67782					10	10	10	54.1	20900	88.028	17011000000	58	183	11
925	5.744	561054	Q1	Q96C19;H0Y4Y4;A0A087X1Z2;Q9BUP0-2;C9JTV4;Q8WYH2	Q96C19	EF-hand domain-containing protein D2	EFHD2	5.74162	5.77775	5.71335	2.94729	2.96801	2.9133	9.66816	9.70429	9.63989					20	20	18	70.8	26697	215.51	18576000000	108	240	11
926	5.744	557494	Q1	O60711;O60711-2;B7Z5P7;E9PNX9	O60711;O60711-2;B7Z5P7	Leupaxin	LPXN	5.68236	5.7864	5.76323	2.88803	2.97667	2.96319	9.77163	9.87567	9.85251					20	20	20	64.8	43332	323.31	32247000000	244	386	16
927	5.744	556062	Q1	Q9BZL1;K7EQ43	Q9BZL1	Ubiquitin-like protein 5	UBL5	5.74057	5.78579	5.70466	2.94624	2.97606	2.90461	9.22778	9.273	9.19187					9	9	9	84.9	8546.8	108.06	7941000000	78	73	4
928	5.743	555991	Q1	Q9UJZ1;A0A087WYB4;Q9UJZ1-2;F2Z2I8	Q9UJZ1;A0A087WYB4;Q9UJZ1-2	Stomatin-like protein 2, mitochondrial	STOML2	5.6785	5.76247	5.78657	2.88416	2.95274	2.98653	9.73974	9.82371	9.84781					22	22	22	74.4	38534	323.31	26110000000	190	356	15
929	5.742	555956	Q1	P53803;E5RGX2	P53803	DNA-directed RNA polymerases I, II, and III subunit RPABC4	POLR2K	5.76694	5.77359	5.68599	2.97261	2.96385	2.88594	8.95312	8.95977	8.87217					3	3	3	44.8	7004.1	5.6694	3119400000	8	58	2
930	5.742	555836	Q1	P20073-2;P20073	P20073-2;P20073	Annexin A7	ANXA7	5.74207	5.7155	5.76734	2.94774	2.90576	2.96729	9.94944	9.92287	9.97471					24	24	24	49.4	50315	323.31	34940000000	158	466	21
931	5.741	555817	Q1	Q92900;Q92900-2	Q92900;Q92900-2	Regulator of nonsense transcripts 1	UPF1	5.74849	5.74468	5.7301	2.95416	2.93495	2.93005	10.3933	10.3895	10.3749					74	74	74	69.6	124340	323.31	95269000000	537	1129	57.5
932	5.741	554570	Q1	P61019;P61019-2;E9PKL7;H7C125;H0YD31;H0YDL5;A0A1D5RMT4	P61019;P61019-2;E9PKL7	Ras-related protein Rab-2A	RAB2A	5.69747	5.70013	5.82515	2.90314	2.89039	3.0251	9.69657	9.69922	9.82424					19	19	10	43.9	23545	295.33	21636000000	144	212	13
933	5.741	552267	Q1	P61201;P61201-2;B4DIH5;H0YKU5;H0YM03;H0YMC2	P61201;P61201-2;B4DIH5;H0YKU5	COP9 signalosome complex subunit 2	COPS2	5.7546	5.75419	5.71282	2.96027	2.94446	2.91277	9.94078	9.94037	9.899					31	31	31	70.7	51596	323.31	34138000000	234	443	20
934	5.736	551015	Q1	P08559;P08559-3;P08559-2;P08559-4;Q5JPU3;Q5JPU0;Q5JPT9;Q5JPU1;Q5JPU2;P29803	P08559;P08559-3;P08559-2;P08559-4	Pyruvate dehydrogenase E1 component subunit alpha, somatic form, mitochondrial	PDHA1	5.74452	5.73347	5.72908	2.95019	2.92374	2.92903	9.97209	9.96105	9.95665					33	33	33	75.1	43295	323.31	36202000000	210	390	22
935	5.734	550776	Q1	Q96G03;Q96G03-2;E7ENQ8;E9PD70;H0Y921	Q96G03	Phosphoglucomutase-2	PGM2	5.72454	5.71012	5.76721	2.93021	2.90039	2.96716	10.1412	10.1267	10.1838					46	46	46	65.2	68283	323.31	52921000000	246	612	34
936	5.733	547104	Q1	O43598;O43598-2;H0Y8X4	O43598;O43598-2;H0Y8X4	2-deoxynucleoside 5-phosphate N-hydrolase 1	DNPH1	5.71692	5.76406	5.71805	2.92259	2.95433	2.918	9.50516	9.5523	9.50629					12	12	12	64.9	19108	239.11	11990000000	86	174	8
937	5.733	544174	Q1	Q92973-2;Q92973;Q92973-3;S4R398;E7EW37;K7ELC3	Q92973-2;Q92973;Q92973-3	Transportin-1	TNPO1	5.71622	5.72579	5.75627	2.92189	2.91606	2.95623	10.2142	10.2237	10.2542					43	43	36	53	101310	323.31	70454000000	384	890	41
938	5.733	542798	Q1	P12081;P12081-4;B3KWE1;P12081-2;P12081-3;B4DDD8;B4E1C5;E7ETE2;D6RF05	P12081;P12081-4;B3KWE1;P12081-2;P12081-3;B4DDD8;B4E1C5;E7ETE2	Histidine--tRNA ligase, cytoplasmic	HARS	5.71012	5.74564	5.74205	2.91578	2.93591	2.942	9.99321	10.0287	10.0251					38	38	30	62.3	57410	323.31	41180000000	260	509	25
939	5.732	541468	Q1	P31040;D6RFM5;P31040-2;A0A087X1I3;P31040-3;H0Y8X1	P31040;D6RFM5;P31040-2;A0A087X1I3;P31040-3	Succinate dehydrogenase [ubiquinone] flavoprotein subunit, mitochondrial	SDHA	5.63011	5.77408	5.79255	2.83577	2.96434	2.9925	9.97766	10.1216	10.1401					35	35	35	68.4	72691	323.31	45645000000	271	664	29
940	5.732	541467	Q1	Q92804-2;Q92804;A0A075B7D9;A0A075B7F4;A0A075B7F2;A0A075B7C1;A0A075B7E4	Q92804-2;Q92804;A0A075B7D9	TATA-binding protein-associated factor 2N	TAF15	5.68543	5.75511	5.7562	2.8911	2.94537	2.95615	10.0619	10.1316	10.1327					25	25	22	51.3	61557	312.84	51048000000	240	589	31
941	5.732	541355	Q1	Q15008;Q15008-4;Q15008-3;Q15008-2;C9J0E9;C9J7B7	Q15008;Q15008-4;Q15008-3;Q15008-2	26S proteasome non-ATPase regulatory subunit 6	PSMD6	5.70095	5.72761	5.76695	2.90662	2.91788	2.96691	9.95717	9.98383	10.0232					34	34	26	54.5	45531	323.31	46102000000	211	389	23.5
942	5.732	541243	Q1	Q14204;H0YJ21	Q14204	Cytoplasmic dynein 1 heavy chain 1	DYNC1H1	5.70864	5.73822	5.74836	2.9143	2.92849	2.94831	11.0037	11.0333	11.0434					335	335	335	73.6	532400	323.31	432270000000	2518	4646	257
943	5.732	540881	Q1	Q99426;Q99426-2;K7EP07;K7EK42;K7EL99;K7EQH0;K7ER04	Q99426;Q99426-2;K7EP07;K7EK42	Tubulin-folding cofactor B	TBCB	5.70589	5.69854	5.79019	2.91156	2.8888	2.99015	9.72137	9.71402	9.80568					23	23	23	87.3	27325	323.31	24737000000	168	244	13.5
944	5.731	540624	Q1	Q9BX68	Q9BX68	Histidine triad nucleotide-binding protein 2, mitochondrial	HINT2	5.74008	5.78284	5.66986	2.94575	2.9731	2.86981	9.66662	9.70938	9.5964					9	9	9	62	17162	272.57	16507000000	74	163	11
945	5.729	540367	Q1	P14927;B7Z2R2;P14927-2	P14927;B7Z2R2;P14927-2	Cytochrome b-c1 complex subunit 7	UQCRB	5.7397	5.7599	5.68771	2.94537	2.95017	2.88766	9.52794	9.54814	9.47595					10	10	6	53.2	13530	143.85	14349000000	54	111	8
946	5.729	539588	Q1	Q9BUJ2-2;Q9BUJ2;A0A0A0MRA5;B7Z4B8;Q9BUJ2-4;Q9BUJ2-3;M0R3F1;M0QYZ0;M0QYI8;M0R0K8;M0QZV6;M0R203;M0QYM5;M0R247;A0A087X1I2;M0QYG9	Q9BUJ2-2;Q9BUJ2;A0A0A0MRA5;B7Z4B8;Q9BUJ2-4;Q9BUJ2-3;M0R3F1;M0QYZ0	Heterogeneous nuclear ribonucleoprotein U-like protein 1	HNRNPUL1	5.70537	5.75545	5.7249	2.91104	2.94572	2.92485	10.109	10.1591	10.1286					46	46	46	53.1	90291	323.31	57153000000	311	804	33
947	5.728	538161	Q1	P53621;P53621-2	P53621;P53621-2	Coatomer subunit alpha;Xenin;Proxenin	COPA	5.6904	5.74979	5.74378	2.89607	2.94005	2.94373	10.4207	10.48	10.474					95	95	95	74.5	138340	323.31	112920000000	733	1224	70
948	5.728	537224	Q1	Q96I25;Q5W012;Q5W010;Q5W011;H0Y6J6	Q96I25;Q5W012	Splicing factor 45	RBM17	5.70588	5.73733	5.74019	2.91155	2.9276	2.94014	9.83407	9.86552	9.86838					29	29	29	77.1	44961	323.31	28778000000	164	401	17.5
949	5.725	537066	Q1	P48739;P48739-3;A0A0A0MSW4;P48739-2;B3KYB7;B3KYB6	P48739;P48739-3;A0A0A0MSW4;P48739-2	Phosphatidylinositol transfer protein beta isoform	PITPNB	5.72641	5.77304	5.6745	2.93208	2.96331	2.87446	9.86683	9.91347	9.81493					25	25	24	77.1	31540	323.31	29346000000	160	271	18
950	5.725	535877	Q1	Q96KB5;Q96KB5-2;E5RFX4;E5RIE1	Q96KB5;Q96KB5-2;E5RFX4	Lymphokine-activated killer T-cell-originated protein kinase	PBK	5.74505	5.73743	5.69145	2.95071	2.9277	2.8914	9.88547	9.87786	9.83187					23	23	23	71.1	36085	245.12	30184000000	181	322	18
951	5.725	535546	Q1	Q99615;Q99615-2;K7ESP1;K7EIH8;K7EPP7;K7ELJ8;K7ER44;K7EJV7;K7EJL5;K7EN19;K7EJ24;K7EJE9;K7EK03;K7ENB7;K7EQ73	Q99615;Q99615-2	DnaJ homolog subfamily C member 7	DNAJC7	5.69119	5.7276	5.75474	2.89686	2.91786	2.95469	10.0535	10.0899	10.117					46	46	46	67.2	56440	323.31	51726000000	325	494	30
952	5.724	534659	Q1	P33241;P33241-3;E7EMG9;P33241-2;E9PBD8;C9JU59;C9JKF7;C9JDV1;C9J9B9;C9JNQ1	P33241;P33241-3;E7EMG9;P33241-2;E9PBD8	Lymphocyte-specific protein 1	LSP1	5.67608	5.72114	5.77461	2.88175	2.91141	2.97456	9.70736	9.75242	9.80589					22	22	22	84.4	37191	323.31	23463000000	134	339	14
953	5.724	533630	Q1	E9PFP8;P57721-5;P57721-4;P57721;J3QT27;P57721-2;P57721-3;C9K0A2;F8WC71;C9IZV9;C9J7A9;C9JSA6;C9J5V4;C9JTY5;C9JZY3;C9J0A4;P57723-2;P57723	E9PFP8;P57721-5;P57721-4;P57721;J3QT27;P57721-2;P57721-3	Poly(rC)-binding protein 3	PCBP3	5.75618	5.64694	5.7686	2.96184	2.83721	2.96855	9.84545	9.73621	9.85787					8	2	1	4.7	38187	4.3114	24273000000	19	361	16
954	5.723	532734	Q1	P00390-2;P00390;P00390-3;P00390-4;P00390-5;H0YC68;E5RI06	P00390-2;P00390;P00390-3;P00390-4;P00390-5	Glutathione reductase, mitochondrial	GSR	5.7089	5.74737	5.71412	2.91456	2.93764	2.91408	9.91626	9.95474	9.92149					32	32	32	77	51700	323.31	32915000000	205	479	21
955	5.723	531881	Q1	Q9HAV7	Q9HAV7	GrpE protein homolog 1, mitochondrial	GRPEL1	5.72474	5.72661	5.71687	2.93041	2.91688	2.91683	9.78598	9.78785	9.77811					16	16	16	65.4	24279	239.33	22740000000	152	217	15
956	5.722	531233	Q1	Q9GZS3;H0YN81;H0YMF9;H0YL19;H0YM76;H3BQA8;H0YLA1	Q9GZS3;H0YN81;H0YMF9;H0YL19	WD repeat-containing protein 61;WD repeat-containing protein 61, N-terminally processed	WDR61	5.69544	5.73706	5.73402	2.90111	2.92733	2.93397	9.69454	9.73616	9.73311					15	15	15	65.6	33580	323.31	21680000000	129	305	13
957	5.721	531226	Q1	Q13011;M0R248;M0QZW4;M0QXS7;M0R280;M0R1A2	Q13011;M0R248	Delta(3,5)-Delta(2,4)-dienoyl-CoA isomerase, mitochondrial	ECH1	5.71361	5.69827	5.75061	2.91928	2.88854	2.95056	9.81625	9.8009	9.85324					22	22	14	49.7	35816	323.31	27126000000	236	328	16.5
958	5.72	529422	Q1	Q9UBS4;H7C2Y5	Q9UBS4;H7C2Y5	DnaJ homolog subfamily B member 11	DNAJB11	5.67775	5.71457	5.76842	2.88341	2.90484	2.96838	9.64208	9.6789	9.73276					15	15	15	50	40513	317.28	22543000000	138	358	12
959	5.719	528156	Q1	V9GZ56;Q9Y4Z0;U3KQK1;U3KQS7;M0QXB0	V9GZ56;Q9Y4Z0;U3KQK1;U3KQS7	U6 snRNA-associated Sm-like protein LSm4	LSM4	5.74592	5.82432	5.5875	2.95159	3.01459	2.78745	9.53416	9.61256	9.37574					10	10	10	32.8	25733	206.22	13252000000	105	238	8
960	5.719	528043	Q1	Q9Y5J7;A0A1W2PRH9;A0A1W2PQS5;G3V502;G3V2F3	Q9Y5J7;A0A1W2PRH9;A0A1W2PQS5;G3V502;G3V2F3	Mitochondrial import inner membrane translocase subunit Tim9	TIMM9	5.6577	5.64178	5.85823	2.86337	2.83205	3.05819	9.24182	9.2259	9.44235					6	6	6	77.5	10378	105.45	7909600000	37	89	5
961	5.717	527937	Q1	Q16698-2;Q16698;E5RFV2;E5RJG7;E5RJD2;E5RID6;H0YAW3	Q16698-2;Q16698;E5RFV2;E5RJG7	2,4-dienoyl-CoA reductase, mitochondrial	DECR1	5.71309	5.67984	5.75906	2.91875	2.8701	2.95902	9.82869	9.79543	9.87466					19	19	19	71.2	34994	303.13	27398000000	120	326	17
962	5.717	527372	Q1	Q9UNZ2;Q9UNZ2-5;Q9UNZ2-4;F2Z2K0;Q9UNZ2-6;R4GNE6;G3V4V8;R4GMY2	Q9UNZ2;Q9UNZ2-5;Q9UNZ2-4;F2Z2K0;Q9UNZ2-6	NSFL1 cofactor p47	NSFL1C	5.67667	5.71856	5.75525	2.88234	2.90883	2.9552	9.84058	9.88247	9.91915					30	30	30	80.8	40572	323.31	30185000000	190	370	19
963	5.717	527050	Q1	H0YHG0;Q6Y2X3;H0YHH1;H0YIP3	H0YHG0			5.66773	5.74517	5.73696	2.87339	2.93544	2.93691	10.0153	10.0927	10.0845					17	17	1	1.7	59075	323.31	44688000000	144	523	29
964	5.716	526489	Q1	Q08257;Q08257-3;A6NP24;C9JH92;Q08257-2	Q08257;Q08257-3;A6NP24;C9JH92;Q08257-2	Quinone oxidoreductase	CRYZ	5.67112	5.73875	5.73748	2.87678	2.92902	2.93743	9.7024	9.77003	9.76876					24	24	24	84.2	35206	323.31	23844000000	146	329	14
965	5.715	525705	Q1	Q9H3N1;G3V448	Q9H3N1	Thioredoxin-related transmembrane protein 1	TMX1	5.62418	5.72226	5.79843	2.82984	2.91252	2.99838	9.55072	9.6488	9.72497					14	14	14	37.9	31791	323.31	15420000000	66	280	11
966	5.715	523056	Q1	P36405	P36405	ADP-ribosylation factor-like protein 3	ARL3	5.66672	5.74532	5.73271	2.87239	2.93559	2.93266	9.59326	9.67187	9.65925					13	13	13	84.1	20455	323.31	16864000000	84	182	11
967	5.714	522409	Q1	Q96K17;E9PL10;Q96K17-2;Q96K17-3	Q96K17;E9PL10;Q96K17-2	Transcription factor BTF3 homolog 4;Transcription factor BTF3	BTF3L4	5.7701	5.70105	5.67215	2.97576	2.89132	2.8721	9.50035	9.4313	9.4024					11	11	11	72.8	17270	323.31	9983500000	72	158	7
968	5.714	522374	Q1	Q9Y547;X6R7Y7;A6NG08	Q9Y547;X6R7Y7	Intraflagellar transport protein 25 homolog	HSPB11	5.75797	5.69117	5.69203	2.96364	2.88144	2.89199	9.42127	9.35447	9.35534					7	7	2	36.8	16297	323.01	8882000000	48	144	6
969	5.712	521087	Q1	E9PLK3;P55786;P55786-2;A6NEC2;E9PP11;H0YDG0;A6NEC2-2;H0YCQ5;E9PJY4;E9PPD4;E9PJ74;E9PJF9;E9PRQ5;E9PPZ2;A6NEC2-3;E9PI82	E9PLK3;P55786;P55786-2	Puromycin-sensitive aminopeptidase	NPEPPS	5.7379	5.6987	5.70017	2.94357	2.88897	2.90012	10.2951	10.256	10.2574					53	53	53	62.6	102990	323.31	73409000000	363	915	47
970	5.709	520478	Q1	Q9UBB4;Q9UBB4-2;A0A1W2PQD2;B1AHE4;B1AHE3	Q9UBB4;Q9UBB4-2;A0A1W2PQD2	Ataxin-10	ATXN10	5.70211	5.71358	5.71138	2.90778	2.90385	2.91133	9.94899	9.96046	9.95825					34	34	34	70.7	53488	323.31	39733000000	233	475	23
971	5.708	520308	Q1	H3BV80;H3BMM9;H3BTC0;Q15287;Q15287-3;Q15287-2;H3BMS0;H3BRK4;H3BTV0;H3BNI3;H3BP82;H3BTR6;H3BUG0;H3BTY0;H3BNU7;H3BUL0	H3BV80;H3BMM9;H3BTC0;Q15287;Q15287-3;Q15287-2;H3BMS0	RNA-binding protein with serine-rich domain 1	RNPS1	5.6748	5.76363	5.68493	2.88047	2.95389	2.88488	9.60134	9.69017	9.61147					8	8	2	9	24561	199.83	19846000000	95	211	11
972	5.707	518647	Q1	P22307-6;P22307-2;P22307-4;P22307-7;P22307-8;P22307;H0YF61	P22307-6;P22307-2;P22307-4;P22307-7;P22307-8;P22307;H0YF61	Non-specific lipid-transfer protein	SCP2	5.71599	5.71409	5.69186	2.92166	2.90436	2.89181	9.92336	9.92146	9.89923					13	13	13	65.7	15079	239.76	37804000000	131	140	21
973	5.707	515986	Q1	Q01085-2	Q01085-2	Nucleolysin TIAR	TIAL1	5.67067	5.75949	5.68977	2.87634	2.94975	2.88973	9.78627	9.87509	9.80537					20	20	4	9.4	43448	323.31	27641000000	152	392	17
974	5.706	514254	Q1	P18085;C9JAK5;C9JPM4;U3KQF2;F8WDB3	P18085;C9JAK5;C9JPM4;U3KQF2	ADP-ribosylation factor 4	ARF4	5.62808	5.78765	5.70312	2.83375	2.97791	2.90307	9.46748	9.62704	9.54251					16	11	11	51.7	20511	65.665	16857000000	54	180	9
975	5.706	512429	Q1	O96000;O96000-2;H3BV16;H3BPJ9	O96000;O96000-2;H3BV16;H3BPJ9	NADH dehydrogenase [ubiquinone] 1 beta subcomplex subunit 10	NDUFB10	5.67197	5.6909	5.75418	2.87764	2.88116	2.95414	9.59852	9.61744	9.68073					20	20	20	72.1	20776	323.31	17840000000	141	172	11
976	5.705	511741	Q1	O43399-2;O43399-4;O43399-3;O43399-6;A0A087WZ51	O43399-2;O43399-4;O43399-3;O43399-6;A0A087WZ51		TPD52L2	5.6968	5.72962	5.68956	2.90247	2.91989	2.88952	9.58195	9.61477	9.57471					16	16	2	7	19901	323.31	16881000000	107	186	10
977	5.705	510912	Q1	O95373;E9PLJ0;E9PLB2	O95373	Importin-7	IPO7	5.69387	5.69907	5.72149	2.89954	2.88934	2.92144	10.2023	10.2075	10.2299					55	55	54	55.4	119520	323.31	71668000000	488	1038	42
978	5.704	509860	Q1	P25685;P25685-2;M0R080;M0QYT3;M0QXK0;M0R1D6;M0QZD0;M0R128;A0A1B0GX60	P25685;P25685-2	DnaJ homolog subfamily B member 1	DNAJB1	5.69433	5.71006	5.70749	2.89999	2.90032	2.90744	9.7836	9.79933	9.79675					31	31	30	66.2	38044	184.12	22995000000	190	340	16
979	5.704	509480	Q1	Q9UMY1;H7C2B1;Q9UMY1-2	Q9UMY1;H7C2B1;Q9UMY1-2	Nucleolar protein 7	NOL7	5.64862	5.70864	5.75348	2.85429	2.89891	2.95343	9.23274	9.29277	9.3376					9	9	9	29.6	29426	253.54	6288700000	47	257	5
980	5.703	509015	Q1	P84085;C9J1Z8	P84085;C9J1Z8	ADP-ribosylation factor 5	ARF5	5.73898	5.71964	5.65127	2.94464	2.90991	2.85122	9.62413	9.60479	9.53642					17	11	11	62.8	20529	134.09	17878000000	94	180	10
981	5.703	507809	Q1	O14776;O14776-2;G3V220;Q5VWI1	O14776;O14776-2;G3V220	Transcription elongation regulator 1	TCERG1	5.66447	5.73454	5.70863	2.87013	2.92481	2.90859	10.1517	10.2218	10.1958					57	57	57	45.4	123900	323.31	58725000000	404	1098	40
982	5.702	507799	Q1	Q9NZ01;M0R3C3;M0QXM3;Q9NZ01-2;M0R329;B4DR74	Q9NZ01	Very-long-chain enoyl-CoA reductase	TECR	5.60984	5.73185	5.7638	2.81551	2.92212	2.96375	9.60893	9.73094	9.76289					15	15	15	33.1	36034	86.109	22631000000	94	308	13
983	5.701	507785	Q1	Q92616	Q92616	Translational activator GCN1	GCN1L1	5.68606	5.72113	5.69646	2.89173	2.91139	2.89642	10.7861	10.8211	10.7965					190	190	190	74.4	292750	323.31	253640000000	1582	2671	164
984	5.7	506963	Q1	E9PL01;A0A087WUC6;Q15005;E9PI68;E9PRB9;H0YE04	E9PL01;A0A087WUC6;Q15005;E9PI68;E9PRB9	Signal peptidase complex subunit 2	SPCS2	5.60515	5.7662	5.72986	2.81081	2.95647	2.92982	9.56948	9.73053	9.69419					13	13	13	63.7	17027	216.64	16752000000	109	157	12
985	5.7	506870	Q1	Q15125;C9J719;C9JJ78	Q15125;C9J719;C9JJ78	3-beta-hydroxysteroid-Delta(8),Delta(7)-isomerase	EBP	5.6006	5.89293	5.60635	2.80627	3.0832	2.80631	9.18472	9.47705	9.19047					4	4	4	18.7	26352	66.169	7209900000	29	230	5
986	5.7	506699	Q1	P04040	P04040	Catalase	CAT	5.61269	5.73264	5.75361	2.81836	2.92291	2.95357	9.96024	10.0802	10.1012					35	35	35	71.7	59755	323.31	44885000000	229	527	29
987	5.699	505836	Q1	O75608;O75608-2;A0A087X1K9;E5RGR0;B4DP64;E5RJ48;E5RI35	O75608;O75608-2;A0A087X1K9;E5RGR0;B4DP64	Acyl-protein thioesterase 1	LYPLA1	5.81159	5.79663	5.48857	3.01726	2.98689	2.68853	9.77592	9.76096	9.45291					10	10	10	77.8	24669	289.09	22343000000	97	230	12
988	5.698	505756	Q1	C9JRZ6;Q9NX63;F8WAR4;F8WD73	C9JRZ6;Q9NX63;F8WAR4	MICOS complex subunit MIC19	CHCHD3	5.67392	5.66625	5.75523	2.87959	2.85652	2.95519	9.67301	9.66535	9.75433					17	17	17	60.3	26694	247.24	20978000000	154	232	13
989	5.698	505248	Q1	O43504	O43504	Ragulator complex protein LAMTOR5	LAMTOR5	5.61377	5.73242	5.74684	2.81943	2.92268	2.94679	9.19789	9.31654	9.33096					6	6	2	37.4	9613.8	323.31	8221800000	69	91	5
990	5.696	503074	Q1	Q9BY32;Q9BY32-3;Q9BY32-2	Q9BY32;Q9BY32-3;Q9BY32-2	Inosine triphosphate pyrophosphatase	ITPA	5.74807	5.60873	5.73247	2.95373	2.79899	2.93242	9.53631	9.39697	9.52071					12	12	12	80.9	21445	173	11591000000	92	194	8
991	5.696	502883	Q1	Q9UMR2;H3BQK0;Q9UMR2-3;H3BN59;H3BMQ5	Q9UMR2;H3BQK0;Q9UMR2-3	ATP-dependent RNA helicase DDX19B	DDX19B	5.6837	5.70406	5.69998	2.88937	2.89432	2.89993	10.0002	10.0206	10.0165					33	33	1	5.6	53926	323.31	41756000000	249	479	27
992	5.696	502039	Q1	P11387;E5RJ33;H0YBR3;H0YAR3	P11387	DNA topoisomerase 1	TOP1	5.81744	5.63121	5.63901	3.02311	2.82148	2.83896	10.2824	10.0961	10.1039					53	53	47	55.2	90725	323.31	61128000000	341	765	38
993	5.696	501882	Q1	Q9BVP2-2;Q9BVP2;C9JZT7;B4DMU5;C9JYH9;Q5T376;Q9P2Q2	Q9BVP2-2;Q9BVP2	Guanine nucleotide-binding protein-like 3	GNL3	5.65288	5.73583	5.69867	2.85855	2.92609	2.89862	9.95301	10.0359	9.99879					37	37	37	56.8	60540	323.31	39661000000	266	537	26
994	5.695	501616	Q1	O43765;K7EMD6;K7ERW5	O43765;K7EMD6	Small glutamine-rich tetratricopeptide repeat-containing protein alpha	SGTA	5.67848	5.67973	5.72667	2.88415	2.87	2.92662	9.56363	9.56488	9.61182					18	18	18	46.3	34063	105.64	14119000000	106	313	10
995	5.695	500512	Q1	Q5SRN5;P04439;Q5SRN7;A0A1W2PS24;P13746;P13746-2;A0A0G2JIF2;P30455;P30443;A0A0G2JI36;A0A1W2PSE7;A0A0G2JL56;A0A1W2PQD0;P05534;P30447;P30456	Q5SRN5;P04439;Q5SRN7;A0A1W2PS24;P13746;P13746-2;A0A0G2JIF2;P30455;P30443;A0A0G2JI36;A0A1W2PSE7;A0A0G2JL56;A0A1W2PQD0;P05534	HLA class I histocompatibility antigen, A-3 alpha chain;HLA class I histocompatibility antigen, A-11 alpha chain;HLA class I histocompatibility antigen, A-36 alpha chain;HLA class I histocompatibility antigen, A-1 alpha chain;HLA class I histocompatibility antigen, A-24 alpha chain	HLA-A	5.66083	5.73947	5.68437	2.86649	2.92974	2.88432	9.85773	9.93638	9.88127					25	25	5	7	41368	323.31	30806000000	208	371	20.5
996	5.694	497865	Q1	Q9H910;Q9H910-3;A6NGP5;H3BMV3;H3BTV5;H3BMM8;B4E1P3;H3BS08	Q9H910;Q9H910-3;A6NGP5;H3BMV3;H3BTV5	Hematological and neurological expressed 1-like protein	HN1L	5.69103	5.73075	5.66138	2.8967	2.92102	2.86133	9.61758	9.65729	9.58792					12	12	3	22.1	20063	159.81	18121000000	70	190	11
997	5.694	496767	Q1	Q9NVQ4;Q9NVQ4-3;Q9NVQ4-2;C9JDZ2	Q9NVQ4;Q9NVQ4-3;Q9NVQ4-2;C9JDZ2	Fas apoptotic inhibitory molecule 1	FAIM	5.63103	5.66068	5.78968	2.83669	2.85094	2.98964	9.53737	9.56701	9.69602					13	13	13	68.7	20215	256.81	14505000000	83	179	10.5
998	5.693	496592	Q1	O60220	O60220	Mitochondrial import inner membrane translocase subunit Tim8 A	TIMM8A	5.64783	5.68394	5.74798	2.8535	2.87421	2.94793	9.23195	9.26806	9.3321					7	7	7	87.6	10998	307.63	6989800000	49	97	5
999	5.693	496074	Q1	P30740;P30740-2	P30740;P30740-2	Leukocyte elastase inhibitor	SERPINB1	5.68662	5.69921	5.69295	2.89229	2.88948	2.8929	9.74786	9.76045	9.75419					27	26	26	64.9	42741	323.31	20844000000	185	379	15
1000	5.692	495818	Q1	Q03252	Q03252	Lamin-B2	LMNB2	5.64591	5.72631	5.70468	2.85158	2.91658	2.90463	10.0993	10.1797	10.158					67	58	58	69.8	69948	323.31	53925000000	366	620	37
1001	5.69	495727	Q1	Q9NRX4;Q9NRX4-2	Q9NRX4	14 kDa phosphohistidine phosphatase	PHPT1	5.69589	5.7582	5.61705	2.90156	2.94847	2.81701	9.48413	9.54644	9.4053					7	7	7	64	13832	97.203	11806000000	70	125	8
1002	5.69	494527	Q1	P08567	P08567	Pleckstrin	PLEK	5.62583	5.7651	5.67858	2.8315	2.95537	2.87853	9.59016	9.72943	9.64291					17	17	17	50.9	40124	323.31	17775000000	139	350	12
1003	5.69	493935	Q1	P53041;H0YDU8;A8MU39	P53041;H0YDU8;A8MU39	Serine/threonine-protein phosphatase 5;Serine/threonine-protein phosphatase	PPP5C	5.71952	5.69391	5.65596	2.92518	2.88418	2.85591	10.036	10.0104	9.97247					33	33	33	70.3	56878	323.31	41813000000	236	499	27
1004	5.689	493870	Q1	Q13573;G3V3A4;G3V4X8;G3V5R3	Q13573;G3V3A4;G3V4X8	SNW domain-containing protein 1	SNW1	5.6961	5.66697	5.70509	2.90177	2.85724	2.90504	9.97919	9.95006	9.98818					35	35	35	63.1	61494	323.31	35326000000	234	536	25
1005	5.689	493124	Q1	Q15021;E7EN77;F5GZK7;F5H431;REV__Q02790	Q15021;E7EN77	Condensin complex subunit 1	NCAPD2	5.68832	5.69349	5.68633	2.89399	2.88376	2.88628	10.3516	10.3568	10.3496					87	87	87	69.7	157180	323.31	91349000000	629	1401	60
1006	5.688	490429	Q1	P19388;A0A0A0MQR7;A0A087WVZ9;A0A087WWX0;A0A087WVN5;K7EQN2;K7EJ87	P19388;A0A0A0MQR7;A0A087WVZ9;A0A087WWX0	DNA-directed RNA polymerases I, II, and III subunit RPABC1	POLR2E	5.66083	5.66602	5.73796	2.8665	2.85629	2.93791	9.56717	9.57236	9.6443					14	14	14	76.7	24551	323.31	17516000000	114	210	10.5
1007	5.688	489465	Q1	A0A0B4J220;E9PLD3;E9PRG8	A0A0B4J220;E9PLD3;E9PRG8	Uncharacterized protein C11orf98	C11orf98	5.56637	5.67729	5.82056	2.77203	2.86756	3.02052	9.05358	9.1645	9.30777					7	7	7	43.1	14234	72.872	6533400000	55	123	4
1008	5.687	489427	Q1	O75439;G3V0E4;F8WAZ6;F8WEA6;F8WBE1	O75439;G3V0E4	Mitochondrial-processing peptidase subunit beta	PMPCB	5.68146	5.70381	5.67655	2.88713	2.89407	2.87651	9.98986	10.0122	9.98495					28	27	27	63.2	54366	323.31	35481000000	186	489	26.5
1009	5.687	489090	Q1	Q9Y2W1	Q9Y2W1	Thyroid hormone receptor-associated protein 3	THRAP3	5.6787	5.70192	5.68058	2.88436	2.89219	2.88054	10.1871	10.2103	10.189					62	62	61	45.2	108660	323.31	64241000000	444	955	42
1010	5.687	487728	Q1	Q14978-2;A0A0A0MRM9;Q14978;S4R349;S4R402;S4R3C2	Q14978-2;A0A0A0MRM9;Q14978	Nucleolar and coiled-body phosphoprotein 1	NOLC1	5.66471	5.71151	5.68401	2.87038	2.90178	2.88396	10.0684	10.1152	10.0877					31	31	2	4.4	74746	247.28	50632000000	280	709	33
1011	5.687	486898	Q1	P43246;E9PHA6;P43246-2;C9J809	P43246;E9PHA6;P43246-2	DNA mismatch repair protein Msh2	MSH2	5.69802	5.68289	5.67871	2.90369	2.87316	2.87866	10.2266	10.2115	10.2073					57	57	57	67.1	104740	323.31	70808000000	423	934	44
1012	5.686	486627	Q1	J3QRS9;O43670-2;O43670;O43670-4;X6R4W8;O43670-3;J3KS31;J3QS27;J3KTL1;J3KRB6;J3KRW6;H0Y3M2	J3QRS9;O43670-2;O43670;O43670-4;X6R4W8;O43670-3	BUB3-interacting and GLEBS motif-containing protein ZNF207	ZNF207	5.67178	5.74008	5.64727	2.87745	2.93035	2.84722	9.70306	9.77136	9.67855					12	12	12	21.1	52541	245.56	24361000000	133	493	14
1013	5.686	486598	Q1	O75643;O75643-2;B4E0P5	O75643	U5 small nuclear ribonucleoprotein 200 kDa helicase	SNRNP200	5.67737	5.71131	5.66921	2.88304	2.90157	2.86916	10.6344	10.6683	10.6262					169	169	168	75.8	244500	323.31	176910000000	1204	2136	118
1014	5.685	485982	Q1	P26640;A0A140T936;A0A140T954;P26640-2;H0Y426;A2ABF4;A0A0G2JJT9;A0A140T904	P26640;A0A140T936	Valine--tRNA ligase	VARS	5.65051	5.68778	5.71614	2.85617	2.87805	2.91609	10.2953	10.3326	10.361					77	77	77	68.4	140470	323.31	87258000000	482	1264	57.5
1015	5.684	485678	Q1	Q9NYF8-3;E9PK91;E9PQN2;E9PKI6;E9PK09;A0A1W2PQ43;H0YF00;H0YF63	Q9NYF8-3;E9PK91;E9PQN2;E9PKI6;E9PK09;A0A1W2PQ43		BCLAF1	5.64605	5.69103	5.71428	2.85172	2.8813	2.91424	9.9936	10.0386	10.0618					56	56	1	1.8	100230	323.31	44813000000	342	869	29
1016	5.684	484882	Q1	P46109	P46109	Crk-like protein	CRKL	5.71192	5.69459	5.64477	2.91759	2.88486	2.84472	9.80119	9.78386	9.73404					19	19	19	70.3	33777	273.98	22576000000	111	303	16
1017	5.683	484826	Q1	Q8NDC0	Q8NDC0	MAPK-interacting and spindle-stabilizing protein-like	MAPK1IP1L	5.37337	6.08842	5.58692	2.57903	3.27868	2.78687	8.55955	9.2746	8.7731					1	1	1	6.9	24269	40.703	3232300000	31	245	2
1018	5.683	483844	Q1	Q9BXP5-4;Q9BXP5-2;Q9BXP5-3;Q9BXP5;Q9BXP5-5;H7C3A1;H7C1K0;C9JUL9;H7C0U8;A0A0A0MSP6;A0A087X0F4	Q9BXP5-4;Q9BXP5-2;Q9BXP5-3;Q9BXP5;Q9BXP5-5;H7C3A1	Serrate RNA effector molecule homolog	SRRT	5.65779	5.67833	5.71225	2.86346	2.8686	2.9122	10.1864	10.2069	10.2409					68	68	68	58.7	100150	323.31	65597000000	409	871	44
1019	5.683	483818	Q1	O75792;A0A1W2PP97	O75792	Ribonuclease H2 subunit A	RNASEH2A	5.6484	5.65737	5.74186	2.85407	2.84763	2.94181	9.70964	9.71861	9.8031					18	18	18	61.2	33395	312.18	23082000000	117	299	15
1020	5.682	483756	Q1	Q14166;V9GY16	Q14166	Tubulin--tyrosine ligase-like protein 12	TTLL12	5.66565	5.70905	5.67271	2.87132	2.89931	2.87267	10.0823	10.1257	10.0893					45	45	45	89	74403	323.31	51753000000	320	644	34
1021	5.682	483373	Q1	P63272;D3DTZ5;J3QSB9;J3KSQ6;J3QR04	P63272;D3DTZ5;J3QSB9	Transcription elongation factor SPT4	SUPT4H1	5.63569	5.67523	5.73582	2.84135	2.8655	2.93577	8.99796	9.03751	9.09809					7	7	7	59	13193	18.771	4275200000	25	117	3
1022	5.681	483295	Q1	Q99442;F8WF48;F8WCJ7	Q99442;F8WF48;F8WCJ7	Translocation protein SEC62	SEC62	5.61543	5.69234	5.73655	2.8211	2.88261	2.9365	9.27873	9.35564	9.39985					15	15	15	20.3	45861	150.24	9095700000	90	399	6
1023	5.681	483142	Q1	P60602;P60602-2	P60602;P60602-2	Reactive oxygen species modulator 1	ROMO1	5.62316	5.65797	5.76313	2.82883	2.84824	2.96308	8.90625	8.94106	9.04622					4	4	4	62	8182.8	134.49	3872700000	23	79	2.5
1024	5.68	482360	Q1	Q9UBQ7;U3KQ56;Q9UBQ7-2	Q9UBQ7;U3KQ56	Glyoxylate reductase/hydroxypyruvate reductase	GRHPR	5.70894	5.59161	5.73825	2.9146	2.78187	2.93821	9.78442	9.66709	9.81373					21	21	21	64.6	35668	323.31	25326000000	152	328	15.5
1025	5.679	481826	Q1	Q2TAY7	Q2TAY7	WD40 repeat-containing protein SMU1;WD40 repeat-containing protein SMU1, N-terminally processed	SMU1	5.6615	5.67487	5.70139	2.86717	2.86514	2.90135	9.96162	9.97499	10.0015					25	25	8	18.9	57543	323.31	39088000000	200	513	26
1026	5.678	481160	Q1	P08237;P08237-3;P08237-2;F8VX13;F8VNX2;F8VZQ1;F8VSL1;F8VW30;F8VZI0;F8VP00;F8W1J8;H0YIS9;F8VSF7;F8VUB8;F8VYK8;F8VTQ3;H0YHB8;F8VVE3	P08237;P08237-3;P08237-2	ATP-dependent 6-phosphofructokinase, muscle type	PFKM	5.63376	5.69677	5.70405	2.83943	2.88704	2.90401	10.0374	10.1004	10.1077					41	39	37	59.7	85182	323.31	49732000000	317	780	33
1027	5.678	480384	Q1	Q14019;H3BT58	Q14019	Coactosin-like protein	COTL1	5.72904	5.70603	5.59891	2.93471	2.89629	2.79887	9.56844	9.54542	9.4383					11	11	11	73.9	15945	96.818	12853000000	51	142	9
1028	5.677	478160	Q1	Q9BQ61;K7EN60;K7ELS0;K7ERU7	Q9BQ61;K7EN60	Uncharacterized protein C19orf43	C19orf43	5.65919	5.65538	5.71721	2.86486	2.84565	2.91716	9.2847	9.2809	9.34272					12	12	12	72.2	18419	201.68	9253700000	63	176	5.5
1029	5.677	477997	Q1	Q9BXJ9;A0A0B4J1W3;Q9BXJ9-4	Q9BXJ9;A0A0B4J1W3;Q9BXJ9-4	N-alpha-acetyltransferase 15, NatA auxiliary subunit	NAA15	5.67803	5.65892	5.69373	2.8837	2.84918	2.89369	10.2792	10.2601	10.2949					71	71	59	61.5	101270	323.31	81213000000	453	866	52
1030	5.677	477886	Q1	P61758;B4DWR3	P61758;B4DWR3	Prefoldin subunit 3	VBP1	5.60182	5.66112	5.76748	2.80749	2.85139	2.96743	9.66306	9.72236	9.82872					15	15	15	60.9	22658	218.87	22986000000	129	197	15
1031	5.676	476644	Q1	Q12972;Q12972-2;A0A0A0MT09;Q12972-3	Q12972	Nuclear inhibitor of protein phosphatase 1;Activator of RNA decay	PPP1R8	5.60957	5.67078	5.74697	2.81524	2.86105	2.94693	9.64085	9.70206	9.77825					25	25	25	64.4	38478	323.31	20524000000	146	351	14
1032	5.675	476121	Q1	Q9UH65;E7EMB1;E9PJM7;E9PJK8	Q9UH65;E7EMB1	Switch-associated protein 70	SWAP70	5.72102	5.69376	5.61096	2.92669	2.88403	2.81091	10.1564	10.1291	10.0463					51	51	51	79.3	68997	323.31	51693000000	341	585	35.5
1033	5.674	475876	Q1	Q9H0Z9;F6VZ39;Q9H0Z9-2;Q9BX46;H0YA61;A6NG75;H0Y8S7;Q9BX46-5;Q9BX46-2;E9PSF1	Q9H0Z9;F6VZ39;Q9H0Z9-2;Q9BX46;H0YA61	RNA-binding protein 38;RNA-binding protein 24	RBM38;RBM24	5.61606	5.65445	5.75069	2.82173	2.84471	2.95065	9.34631	9.38469	9.48094					13	13	13	52.3	25498	177.83	9598000000	73	239	7
1034	5.673	475474	Q1	O95456;O95456-2;F8WBH7	O95456;O95456-2	Proteasome assembly chaperone 1	PSMG1	5.61953	5.69337	5.70598	2.8252	2.88364	2.90594	9.66605	9.73989	9.7525					18	18	18	74.3	32854	323.31	19940000000	126	288	14.5
1035	5.672	472718	Q1	P49459;A0A0D9SG71;A0A0R4J2E5;P49459-3;A0A0D9SEZ6;P49459-2	P49459;A0A0D9SG71;A0A0R4J2E5;P49459-3;A0A0D9SEZ6;P49459-2	Ubiquitin-conjugating enzyme E2 A	UBE2A	5.6509	5.72943	5.63474	2.85657	2.9197	2.8347	9.01317	9.0917	8.99701					6	6	4	46.1	17315	145.1	4519300000	33	152	3
1036	5.671	472275	Q1	O75934	O75934	Pre-mRNA-splicing factor SPF27	BCAS2	5.68453	5.72711	5.60174	2.8902	2.91738	2.80169	9.68362	9.72621	9.60083					17	17	17	84	26131	323.31	20443000000	118	225	13
1037	5.669	471735	Q1	Q9ULZ3;Q9ULZ3-3;H3BP42	Q9ULZ3;Q9ULZ3-3	Apoptosis-associated speck-like protein containing a CARD	PYCARD	5.72498	5.70097	5.57973	2.93064	2.89124	2.77968	9.61013	9.58612	9.46488					18	18	3	23.1	21627	310.69	13664000000	147	195	10
1038	5.668	471040	Q1	P17480	P17480	Nucleolar transcription factor 1	UBTF	5.67924	5.73314	5.59257	2.8849	2.92341	2.79252	10.0959	10.1498	10.0092					49	49	2	1.6	89405	323.31	51438000000	332	764	34
1039	5.666	470025	Q1	O00567;Q5JXT2;H0YDU4;H0Y653	O00567	Nucleolar protein 56	NOP56	5.70864	5.61975	5.66944	2.9143	2.81001	2.86939	10.0852	9.99626	10.0459					43	43	43	78.8	66049	323.31	43311000000	296	594	31
1040	5.666	465003	Q1	Q9BZK7;A0A0D9SF63;A0A1B0GVH3;A0A0D9SFI2;A0A1B0GUU2;F8W9D8;C9IYU9;C9JTW8;C9JY82;C9JEC9;C9J3H2;C9J903;A0A0D9SEW5;A0A0D9SFS8;C9J7E1;C9JCW4;C9JLJ1;C9JCK0;C9JBN1;A0A0D9SF25	Q9BZK7;A0A0D9SF63	F-box-like/WD repeat-containing protein TBL1XR1	TBL1XR1	5.66068	5.70565	5.63086	2.86635	2.89592	2.83082	9.86805	9.91302	9.83823					27	27	21	71.2	55594	323.31	26794000000	175	514	21
1041	5.665	464329	Q1	A0A0A0MT22;P08575;X6R433;P08575-2;M3ZCP1;A0A075B788;E9PKH0;A0A140TA68;A0A140TA77;A0A0G2JNW2;A0A140TA57;M9MMK9	A0A0A0MT22;P08575;X6R433;P08575-2	Protein-tyrosine-phosphatase;Receptor-type tyrosine-protein phosphatase C	PTPRC / CD45	5.65919	5.66029	5.67585	2.86486	2.85056	2.8758	10.3115	10.3126	10.3282			+		71	71	71	55.1	147480	323.31	86816000000	473	1306	58.5
1042	5.665	462923	Q1	P43007;P43007-2	P43007;P43007-2	Neutral amino acid transporter A	SLC1A4	5.63288	5.70283	5.6579	2.83855	2.8931	2.85785	9.66416	9.73411	9.68918					11	11	11	27.4	55722	323.31	18851000000	91	532	14
1043	5.664	462572	Q1	P40259;P40259-3;P40259-2	P40259;P40259-3;P40259-2	B-cell antigen receptor complex-associated protein beta chain	CD79B	5.6633	5.65004	5.67807	2.86897	2.84031	2.87802	9.54845	9.53519	9.56322					6	6	6	33.2	26048	210.6	17356000000	73	229	10
1044	5.663	461604	Q1	Q8WY22;REV__Q96PE2	Q8WY22	BRI3-binding protein	BRI3BP	5.63455	5.69072	5.66244	2.84021	2.88098	2.86239	9.42279	9.47896	9.45068					8	8	8	23.5	27835	178	11781000000	46	251	8
1045	5.661	461270	Q1	Q6IBS0;D6RG15;H7C5I2	Q6IBS0;D6RG15	Twinfilin-2	TWF2	5.63404	5.68656	5.66357	2.8397	2.87683	2.86353	9.77446	9.82699	9.804					30	16	15	46.7	39548	323.31	22978000000	144	349	18
1046	5.661	460439	Q1	P45974-2;P45974;F5H571	P45974-2;P45974	Ubiquitin carboxyl-terminal hydrolase 5	USP5	5.64253	5.68171	5.65889	2.8482	2.87198	2.85884	10.1243	10.1635	10.1406					66	66	64	69.1	93307	323.31	54605000000	493	835	39.5
1047	5.661	459966	Q1	P51649;P51649-2;C9J8Q5	P51649;P51649-2;C9J8Q5	Succinate-semialdehyde dehydrogenase, mitochondrial	ALDH5A1	5.62882	5.71183	5.64247	2.83449	2.90209	2.84242	9.92894	10.012	9.94259					32	32	32	66.5	57214	323.31	37297000000	249	535	26
1048	5.661	459817	Q1	P26196;Q8IV96	P26196	Probable ATP-dependent RNA helicase DDX6	DDX6	5.66038	5.65038	5.67214	2.86605	2.84065	2.8721	9.99269	9.98269	10.0045					41	41	41	82.6	54416	323.31	42869000000	280	483	28
1049	5.659	459116	Q1	P51572;P51572-2;C9JSP1;C9JQ75;C9J0M4;C9JMD7;C9JM14	P51572;P51572-2;C9JSP1;C9JQ75;C9J0M4	B-cell receptor-associated protein 31	BCAP31	5.56912	5.66487	5.74177	2.77478	2.85514	2.94173	9.45427	9.55002	9.62692					15	15	15	38.2	27991	323.31	17028000000	135	246	10
1050	5.658	458501	Q1	P49770;G3V5E5;H0YJJ8;H0YK01	P49770;G3V5E5;H0YJJ8	Translation initiation factor eIF-2B subunit beta	EIF2B2	5.64758	5.65934	5.66805	2.85325	2.8496	2.868	9.57412	9.58588	9.59459					23	23	23	59.3	38989	218.37	15346000000	148	351	11
1051	5.658	458204	Q1	P14735;P14735-2;Q5T5N3	P14735;P14735-2	Insulin-degrading enzyme	IDE	5.63234	5.65242	5.68899	2.83801	2.84268	2.88894	10.0915	10.1116	10.1482					60	60	60	60.3	117970	323.31	51331000000	403	1019	37.5
1052	5.658	457079	Q1	Q9UBQ0;F8VXU5;Q9UBQ0-2;Q05DG7	Q9UBQ0;F8VXU5;Q9UBQ0-2	Vacuolar protein sorting-associated protein 29	VPS29	5.61327	5.68973	5.6696	2.81894	2.87999	2.86956	9.49842	9.57488	9.55476					14	14	14	68.7	20505	286.64	13772000000	96	182	10
1053	5.657	455746	Q1	O95831;O95831-3;O95831-2;E9PMA0;O95831-4;O95831-6;O95831-5	O95831;O95831-3;O95831-2	Apoptosis-inducing factor 1, mitochondrial	AIFM1	5.63466	5.65946	5.6769	2.84032	2.84972	2.87686	9.99693	10.0217	10.0392					40	40	40	65.4	66900	323.31	41015000000	281	613	30
1054	5.656	455568	Q1	P63151;P63151-2;E5RFR9;E5RIY1;A0A1W2PQI2;E5RHQ2;E5RJV2;H0YA16	P63151;P63151-2	Serine/threonine-protein phosphatase 2A 55 kDa regulatory subunit B alpha isoform	PPP2R2A	5.64826	5.70357	5.61736	2.85392	2.89384	2.81731	9.91362	9.96894	9.88272					31	31	21	71.6	51691	323.31	32976000000	257	447	24
1055	5.656	455410	Q1	D6R938;Q13557;Q13557-6;Q13557-11;E9PF82;Q13557-8;Q13557-10;Q13557-3;Q13557-4;E9PBG7;Q13557-9;Q13557-5;H0Y9J2;H0Y9C2;Q9UQM7;Q9UQM7-2;E9PBE8;E7EQE4;D6RHX9;E7ETC9	D6R938;Q13557;Q13557-6;Q13557-11;E9PF82;Q13557-8;Q13557-10;Q13557-3;Q13557-4;E9PBG7;Q13557-9;Q13557-5	Calcium/calmodulin-dependent protein kinase type II subunit delta	CAMK2D	5.66938	5.6832	5.61651	2.87504	2.87346	2.81647	9.9695	9.98332	9.91664					27	27	2	4.4	56298	323.31	35930000000	160	498	26
1056	5.656	455014	Q1	A0A087WZ13;E9PAU2;Q8IY67-2;K7EQG2;K7EKR9;Q8IY67-3	A0A087WZ13;E9PAU2;Q8IY67-2	Ribonucleoprotein PTB-binding 1	RAVER1	5.60749	5.6523	5.70839	2.81315	2.84256	2.90834	9.89058	9.93539	9.99148					35	35	16	27.9	77843	323.31	35987000000	305	739	25
1057	5.656	454854	Q1	O60739;K7EQP2	O60739	Eukaryotic translation initiation factor 1b	EIF1B	5.63932	5.6545	5.67281	2.84499	2.84477	2.87277	9.22344	9.23862	9.25693					11	4	4	45.1	12823	115.06	6949100000	37	113	5
1058	5.655	454308	Q1	O75832;B1AJY5;B1AJY7;O75832-2;B1AJY6	O75832;B1AJY5;B1AJY7;O75832-2	26S proteasome non-ATPase regulatory subunit 10	PSMD10	5.73244	5.69249	5.54063	2.93811	2.88276	2.74059	9.63878	9.59883	9.44697					14	14	14	79.6	24428	298.43	15726000000	108	226	10.5
1059	5.655	454255	Q1	Q9NPA8-2;Q9NPA8;E5RHX8;J3KNT2;E5RI00;E5RHT9;E5RJ84	Q9NPA8-2;Q9NPA8	Transcription and mRNA export factor ENY2	ENY2	5.67771	5.61886	5.66693	2.88338	2.80912	2.86689	9.26183	9.20298	9.25105					10	10	10	61.5	10984	41.216	5467100000	41	96	5
1060	5.654	453649	Q1	C9J4J4;Q02080-2;B8ZZJ5;B3KQ23	C9J4J4;Q02080-2;B8ZZJ5;B3KQ23	Myocyte-specific enhancer factor 2B	MEF2B	5.63953	5.6775	5.64644	2.84519	2.86776	2.8464	9.71501	9.75298	9.72193					25	25	10	22.9	39810	203.94	19934000000	120	375	15.5
1061	5.654	453478	Q1	O00629;H7C4F6	O00629	Importin subunit alpha-3	KPNA4	5.63248	5.71594	5.61436	2.83815	2.9062	2.81431	9.72175	9.80521	9.70363					23	14	14	38	57886	322.53	23144000000	118	521	16
1062	5.654	453322	Q1	Q96AT9;C9J9T0;C9IZU8;Q96AT9-4;Q96AT9-2;C9J6A7;Q96AT9-5;Q96AT9-3;C9IYE8;E7ESZ6;C9J8S0;Q2QD12;C9JCL8;E9PBG9;F8WBT4	Q96AT9;C9J9T0;C9IZU8;Q96AT9-4;Q96AT9-2;C9J6A7;Q96AT9-5;Q96AT9-3	Ribulose-phosphate 3-epimerase	RPE	5.72328	5.62459	5.61266	2.92894	2.81486	2.81262	9.48349	9.3848	9.37288					10	10	10	70.6	24927	150.31	11283000000	87	228	7.5
1063	5.651	452650	Q1	B0QYK0;Q01844-6;Q01844-3;Q01844;Q01844-5;A0A0D9SFL3;Q01844-2;Q01844-4	B0QYK0;Q01844-6;Q01844-3;Q01844;Q01844-5;A0A0D9SFL3;Q01844-2	RNA-binding protein EWS	EWSR1	5.66819	5.72696	5.55855	2.87386	2.91723	2.75851	9.78379	9.84256	9.67415					8	8	1	3.9	64929	312.21	29833000000	96	618	17
1064	5.651	452241	Q1	Q96C90	Q96C90	Protein phosphatase 1 regulatory subunit 14B	PPP1R14B	5.61116	5.56852	5.77269	2.81682	2.75879	2.97264	9.27446	9.23183	9.43599					6	6	5	63.3	15911	194.79	7238200000	46	147	6
1065	5.65	452112	Q1	Q8WVJ2;E5RFP0	Q8WVJ2;E5RFP0	NudC domain-containing protein 2	NUDCD2	5.6285	5.6914	5.63087	2.83417	2.88167	2.83082	9.32656	9.38947	9.32893					10	10	10	66.9	17676	107.39	8954600000	50	157	6.5
1066	5.65	451653	Q1	Q14157-1;Q14157-4	Q14157-1;Q14157-4	Ubiquitin-associated protein 2-like	UBAP2L	5.64085	5.70524	5.6044	2.84652	2.8955	2.80435	9.97316	10.0375	9.9367					32	32	3	4.5	103930	323.31	41549000000	250	983	28
1067	5.649	448933	Q1	A0A0C4DGS1;P39656-3;P39656;P39656-2;U3KQ84	A0A0C4DGS1;P39656-3;P39656;P39656-2	Dolichyl-diphosphooligosaccharide--protein glycosyltransferase 48 kDa subunit	DDOST	5.56681	5.74065	5.64102	2.77247	2.93092	2.84098	9.80414	9.97798	9.87836					17	17	17	52.4	48799	323.31	32712000000	133	439	22.5
1068	5.649	447967	Q1	A0A087WZN1;O43837;A0A087X2E5;O43837-2;O43837-3;A0A0D9SG66	A0A087WZN1;O43837;A0A087X2E5;O43837-2	Isocitrate dehydrogenase [NAD] subunit, mitochondrial;Isocitrate dehydrogenase [NAD] subunit beta, mitochondrial	IDH3B	5.67621	5.67488	5.59547	2.88188	2.86515	2.79543	9.87312	9.87179	9.79238					23	23	23	58.9	42410	323.31	32678000000	199	387	20.5
1069	5.648	447363	Q1	P10515;E9PEJ4;H0YDD4	P10515;E9PEJ4;H0YDD4	Dihydrolipoyllysine-residue acetyltransferase component of pyruvate dehydrogenase complex, mitochondrial;Acetyltransferase component of pyruvate dehydrogenase complex	DLAT	5.66676	5.63301	5.64539	2.87243	2.82328	2.84534	9.99907	9.96532	9.9777					26	26	26	48.4	68996	266.55	39608000000	198	647	28
1070	5.647	447160	Q1	Q9Y5M8;H7C4H2;C9J5Z8	Q9Y5M8;H7C4H2	Signal recognition particle receptor subunit beta	SRPRB	5.57193	5.68509	5.68541	2.77759	2.87535	2.88537	9.57102	9.68418	9.6845					20	20	20	59.8	29702	320.07	18324000000	98	271	13
1071	5.647	446400	Q1	O95861-3;F8VRY7	O95861-3			5.60085	5.70973	5.63121	2.80651	2.9	2.83116	9.69012	9.799	9.72048					17	5	1	3.2	27543	102.74	22473000000	65	253	16
1072	5.646	445257	Q1	P46063;F8WA66;F8WD97;F5H2L2;F5H4P4;F5H3W0;F5GYB7	P46063	ATP-dependent DNA helicase Q1	RECQL	5.60773	5.68124	5.64884	2.8134	2.8715	2.84879	10.0369	10.1105	10.0781					40	40	40	71.5	73457	323.31	50525000000	336	649	35
1073	5.646	445198	Q1	Q9BVC6	Q9BVC6	Transmembrane protein 109	TMEM109	5.57307	5.6792	5.68455	2.77874	2.86947	2.8845	9.36131	9.46744	9.47279					7	7	7	12.8	26210	46.525	9337100000	61	243	8
1074	5.645	443581	Q1	Q86SX6	Q86SX6	Glutaredoxin-related protein 5, mitochondrial	GLRX5	5.61332	5.67236	5.65013	2.81899	2.86262	2.85008	9.34357	9.4026	9.38037					12	12	12	56.7	16628	210.81	9368500000	73	157	7
1075	5.644	442532	Q1	P26639;P26639-2;D6R9F8;D6RCA5;D6RDJ6;D6RBR8;D6RJ97;D6RHV7;D6RCS6	P26639;P26639-2	Threonine--tRNA ligase, cytoplasmic	TARS	5.64435	5.66467	5.62437	2.85001	2.85494	2.82433	10.1527	10.1731	10.1328					59	59	53	68.6	83434	323.31	56789000000	345	723	42
1076	5.644	442246	Q1	Q9NX24;D6RC52;D6RCB9;J3QSY4;H0YC83	Q9NX24;D6RC52;D6RCB9;J3QSY4	H/ACA ribonucleoprotein complex subunit 2	NHP2	5.66045	5.62254	5.64961	2.86612	2.81281	2.84957	9.24457	9.20666	9.23373					10	10	10	80.4	17201	200.89	8239300000	70	153	5
1077	5.644	441860	Q1	Q13423;E9PCX7;D6RAI5;D6RHU2;H0Y8P5;D6RCR6	Q13423;E9PCX7	NAD(P) transhydrogenase, mitochondrial	NNT	5.64659	5.62632	5.6584	2.85226	2.81658	2.85836	10.1702	10.15	10.182					51	51	51	45.5	113890	323.31	57011000000	310	1086	43.5
1078	5.643	441342	Q1	P51114;B4DXZ6;P51114-3;C9JAJ4;H7C4S4;C9JY20;C9JZE0;C9IZ22;C9J5B4;C9JYQ6	P51114;B4DXZ6;P51114-3	Fragile X mental retardation syndrome-related protein 1	FXR1	5.58903	5.64298	5.69712	2.7947	2.83325	2.89708	9.90555	9.9595	10.0136					40	40	6	14.2	69720	323.31	38679000000	262	621	27
1079	5.643	441056	Q1	Q15382;C9J931;C9J469;F8WBL3	Q15382;C9J931	GTP-binding protein Rheb	RHEB	5.57209	5.68971	5.66648	2.77775	2.87998	2.86643	9.3323	9.44993	9.42669					11	11	11	51.1	20497	121.58	10483000000	59	184	7.5
1080	5.641	440528	Q1	O15355	O15355	Protein phosphatase 1G	PPM1G	5.6371	5.60905	5.67692	2.84276	2.79932	2.87688	9.92019	9.89214	9.96001					30	30	30	68.9	59271	323.31	36295000000	275	546	25
1081	5.641	438449	Q1	O75223;M0QZK8;B8ZZK2;O75223-3;H7BZK5;O75223-2;O75223-4;A0A0B4J1Y4	O75223;M0QZK8;B8ZZK2	Gamma-glutamylcyclotransferase	GGCT	5.65488	5.66751	5.59963	2.86055	2.85777	2.79958	9.58143	9.59405	9.52617					16	16	16	85.1	21007	263.11	16250000000	91	188	11
1082	5.641	438186	Q1	P46926;D6R9P4;D6RAY7;D6RFF8;P46926-2;D6RB13;D6R917;D6RFK5	P46926;D6R9P4;D6RAY7;D6RFF8;P46926-2;D6RB13;D6R917	Glucosamine-6-phosphate isomerase 1;Glucosamine-6-phosphate isomerase	GNPDA1	5.63481	5.6368	5.65012	2.84048	2.82707	2.85007	9.66609	9.66808	9.6814					18	18	12	57.4	32668	323.31	20182000000	142	289	14
1083	5.639	437148	Q1	P51970	P51970	NADH dehydrogenase [ubiquinone] 1 alpha subcomplex subunit 8	NDUFA8	5.60806	5.67717	5.63235	2.81373	2.86744	2.83231	9.44745	9.51656	9.47175					12	12	12	72.1	20105	141.75	10701000000	81	172	9
1084	5.638	436661	Q1	Q9Y294	Q9Y294	Histone chaperone ASF1A	ASF1A	5.60928	5.63022	5.67535	2.81495	2.82048	2.87531	9.27258	9.29352	9.33865					9	8	8	53.9	22968	157.57	5916500000	46	204	6
1085	5.636	436633	Q1	P11233;H7C3P7;C9JPE8	P11233;H7C3P7	Ras-related protein Ral-A	RALA	5.58198	5.64237	5.68226	2.78765	2.83264	2.88222	9.39655	9.45694	9.49683					16	16	9	26.7	23567	293.97	10632000000	96	206	8.5
1086	5.635	435679	Q1	Q9Y2Q9;H0YAT2;H7C5V3;E5RGC7;E5RFH3;E5RK86;E5RFT8	Q9Y2Q9;H0YAT2;H7C5V3;E5RGC7;E5RFH3	28S ribosomal protein S28, mitochondrial	MRPS28	5.57633	5.60809	5.72208	2.78199	2.79836	2.92203	9.30658	9.33834	9.45232					11	11	8	36.4	20843	150.62	9473400000	60	187	7
1087	5.635	434029	Q1	P55263;P55263-3	P55263;P55263-3	Adenosine kinase	ADK	5.58149	5.63618	5.68833	2.78716	2.82645	2.88828	9.7784	9.83308	9.88523					29	29	5	11.3	40545	323.31	28756000000	256	362	20.5
1088	5.634	433988	Q1	F5GWX5;A0A0C4DGG9;Q14839;Q14839-2;F5H6N4;F6T542;K7EPV1;K7ESA5	F5GWX5;A0A0C4DGG9;Q14839;Q14839-2	Chromodomain-helicase-DNA-binding protein 4	CHD4	5.60314	5.6371	5.66285	2.80881	2.82736	2.86281	10.4352	10.4692	10.4949					134	134	108	51.8	217100	323.31	121960000000	1036	1905	88.5
1089	5.634	433705	Q1	Q15363;F5GX39;E7EQ72	Q15363;F5GX39;E7EQ72	Transmembrane emp24 domain-containing protein 2	TMED2	5.66049	5.681	5.56083	2.86616	2.87127	2.76079	9.39074	9.41125	9.29108					11	11	11	37.8	22761	134.73	11798000000	82	201	7
1090	5.633	431569	Q1	O00429;O00429-3;O00429-6;O00429-5;O00429-7;F8VZ52;F8W1W3;F8VUJ9;B4DDQ3;B4DPZ9;F8VR28;F8VYL3;H0YHY4;H0YI79	O00429;O00429-3;O00429-6;O00429-5;O00429-7	Dynamin-1-like protein	DNM1L	5.6347	5.62279	5.64274	2.84037	2.81305	2.8427	10.2101	10.1981	10.2181					58	58	1	3	81876	323.31	66055000000	647	736	49
1091	5.63	430020	Q1	A0A0C4DGQ5;P04632;K7ELJ7;A0A075B7C0;U3KQE2;K7EKD8;K7EIV0;K7EM73;U3KPR7;K7EMQ1;K7ES78;Q96L46	A0A0C4DGQ5;P04632;K7ELJ7;A0A075B7C0;U3KQE2;K7EKD8;K7EIV0;K7EM73	Calpain small subunit 1	CAPNS1	5.63575	5.64142	5.61213	2.84142	2.83169	2.81208	9.49863	9.50429	9.475					21	21	21	73	33786	323.31	12550000000	171	322	9.5
1092	5.629	426920	Q1	O75489;E9PS48;O75489-2;G3V194;E9PKL8	O75489	NADH dehydrogenase [ubiquinone] iron-sulfur protein 3, mitochondrial	NDUFS3	5.58813	5.64482	5.65513	2.7938	2.83509	2.85509	9.70373	9.76042	9.77073					22	22	22	64.8	30241	323.31	20714000000	137	264	17
1093	5.629	426661	Q1	Q9NRN7;E9PLW6;E9PNF3;Q9NRN7-2	Q9NRN7;E9PLW6	L-aminoadipate-semialdehyde dehydrogenase-phosphopantetheinyl transferase	AASDHPPT	5.62621	5.6509	5.61006	2.83188	2.84117	2.81002	9.55275	9.57745	9.53661					19	19	19	58.9	35776	163.6	15390000000	127	309	11
1094	5.628	426532	Q1	O75340;O75340-2;A0A024QZ42;H0Y9X3;A0A087WZ38;E7EPW6;O75340-3;D6RA21;Q86W51	O75340;O75340-2;A0A024QZ42	Programmed cell death protein 6	PDCD6	5.60013	5.66395	5.62017	2.8058	2.85422	2.82013	9.52667	9.5905	9.54672					14	14	14	82.2	21868	174.04	16902000000	111	191	11
1095	5.627	426213	Q1	Q8N5M4;E9PKV8;H0YDR3;E7EST3;Q8N5M4-2	Q8N5M4;E9PKV8;H0YDR3	Tetratricopeptide repeat protein 9C	TTC9C	5.55145	5.67422	5.65484	2.75712	2.86448	2.85479	9.03866	9.16143	9.14204					10	10	10	48	20012	107.43	4956700000	42	171	4
1096	5.626	425976	Q1	A0A087X020;Q9Y3A5;F8WE72	A0A087X020;Q9Y3A5	Ribosome maturation protein SBDS	SBDS	5.63177	5.64269	5.60254	2.83744	2.83296	2.80249	9.74737	9.75829	9.71814					25	25	25	67.2	28864	323.31	20808000000	124	250	17
1097	5.625	425798	Q1	Q14677-3;Q14677-2;Q14677;H0YD52	Q14677-3;Q14677-2;Q14677	Clathrin interactor 1	CLINT1	5.58581	5.65759	5.6319	2.79148	2.84786	2.83185	9.83269	9.90447	9.87877					28	28	28	42.6	70294	323.31	29871000000	202	643	23
1098	5.624	425510	Q1	Q9UBB5;X6RBL6;Q9UBB5-3;J3KSA7	Q9UBB5	Methyl-CpG-binding domain protein 2	MBD2	5.57409	5.57905	5.71952	2.77976	2.76932	2.91947	9.68969	9.69465	9.83512					18	18	17	50.6	43254	323.31	22967000000	126	411	17
1099	5.624	424659	Q1	P61009	P61009	Signal peptidase complex subunit 3	SPCS3	5.62964	5.67835	5.56426	2.83531	2.86862	2.76422	9.35989	9.4086	9.29451					8	8	8	38.9	20313	21.601	9041600000	41	180	7
1100	5.622	423233	Q1	A8MX21;Q9UKI3	A8MX21;Q9UKI3	Pre-B lymphocyte protein 3	VPREB3	5.52255	5.66427	5.6806	2.72822	2.85454	2.88055	8.95177	9.09349	9.10981					5	5	5	62.6	12014	87.302	4845500000	42	107	3.5
1101	5.622	422771	Q1	B7ZC38;Q9NR46;Q9NR46-2;B7ZC39;F8WFB9;G5E9J1;H7C1Z6	B7ZC38;Q9NR46;Q9NR46-2;B7ZC39	Endophilin-B2	SH3GLB2	5.64191	5.65245	5.57245	2.84757	2.84271	2.7724	9.78233	9.79287	9.71287					25	25	24	58.2	44361	323.31	22879000000	120	400	18
1102	5.622	422665	Q1	E9PRQ7;Q04323;A0A087WTZ5;E9PJ81;Q04323-2;E9PS08	E9PRQ7;Q04323;A0A087WTZ5;E9PJ81;Q04323-2	UBX domain-containing protein 1	UBXN1	5.56171	5.64682	5.65775	2.76738	2.83709	2.85771	9.59299	9.6781	9.68903					23	23	23	58	32913	323.31	20633000000	137	293	14
1103	5.621	420889	Q1	Q9H444;Q96CF2;P59074	Q9H444	Charged multivesicular body protein 4b	CHMP4B	5.57463	5.67488	5.61314	2.7803	2.86514	2.81309	9.60591	9.70615	9.64442					16	16	16	79.5	24950	184.66	18292000000	103	224	14
1104	5.621	420425	Q1	P16989;P16989-3;Q9Y2T7;A0A0D9SEI8	P16989;P16989-3	Y-box-binding protein 3	YBX3	5.58639	5.62465	5.65122	2.79205	2.81491	2.85117	9.55072	9.58898	9.61555					33	24	8	21	40089	323.31	15782000000	157	372	12
1105	5.62	420423	Q1	Q16740;M0R208;M0QYV5	Q16740;M0R208	ATP-dependent Clp protease proteolytic subunit, mitochondrial;ATP-dependent Clp protease proteolytic subunit	CLPP	5.6183	5.62868	5.61318	2.82397	2.81895	2.81314	9.60036	9.61074	9.59524					14	14	14	43.7	30180	213.8	17347000000	136	277	12.5
1106	5.62	420377	Q1	P21964-2;P21964;E7EMS6;E7EUU8;H7BZ45;F8WBW9	P21964-2;P21964;E7EMS6;E7EUU8	Catechol O-methyltransferase	COMT	5.58547	5.69705	5.57752	2.79114	2.88732	2.77748	9.56753	9.67911	9.55958					19	19	19	87.3	24449	323.31	16684000000	125	221	12.5
1107	5.619	420277	Q1	P30519;A0A087WT44;I3L159;I3L1F5;I3L4P8;A0A1B0GXH0;I3L463;I3L276;I3L1Y2	P30519;A0A087WT44;I3L159;I3L1F5	Heme oxygenase 2	HMOX2	5.57263	5.65817	5.62667	2.7783	2.84843	2.82663	9.64812	9.73365	9.70215					23	23	2	5.1	36032	323.31	20903000000	182	316	15.5
1108	5.619	419623	Q1	P21281;H0YC04;C9JL73;P15313;E5RGH6;H0YAT8;C9JZ02;C9J5E3;C9JNS9;H0YC45	P21281	V-type proton ATPase subunit B, brain isoform	ATP6V1B2	5.62539	5.59664	5.6347	2.83106	2.78691	2.83466	9.90848	9.87973	9.91779					36	36	36	86.5	56500	323.31	30232000000	260	511	25
1109	5.619	418371	Q1	Q8N163-2;Q8N163;H0YB24;G3V119;E5RHJ4;E5RFJ3;A0A087X2B6;H0YC69;E5RGU7;H0YC58;E5RHH8	Q8N163-2;Q8N163;H0YB24;G3V119	Cell cycle and apoptosis regulator protein 2	CCAR2	5.64072	5.60525	5.61073	2.84638	2.79552	2.81069	10.1387	10.1032	10.1087					48	48	48	58.6	103140	323.31	52995000000	287	923	41
1110	5.619	417427	Q1	Q9Y3D6	Q9Y3D6	Mitochondrial fission 1 protein	FIS1	5.60549	5.70427	5.54649	2.81116	2.89454	2.74644	9.33574	9.43452	9.27674					7	7	7	48.7	16937	60.032	8680900000	39	152	7
1111	5.618	416970	Q1	Q9NYL9;H0YNJ8;H0YKU1;H0YNU8	Q9NYL9;H0YNJ8	Tropomodulin-3	TMOD3	5.60194	5.59013	5.66191	2.8076	2.7804	2.86186	9.70457	9.69277	9.76454					21	21	19	67	39594	323.31	19507000000	164	352	16.5
1112	5.618	416380	Q1	P0DN79;P35520;P35520-2;C9JMA6;H7C2H4;H7C1W6;H7C2W0	P0DN79;P35520;P35520-2	Cystathionine beta-synthase	CBS	5.56551	5.62828	5.65947	2.77118	2.81855	2.85942	9.86564	9.92841	9.95959					35	35	35	80.8	60586	323.31	34248000000	246	551	26
1113	5.618	416113	Q1	Q96FZ2;E7EMP6;D6R9T3;D6RAZ3;D6RGK7;D6RAI0	Q96FZ2;E7EMP6;D6R9T3;D6RAZ3	Embryonic stem cell-specific 5-hydroxymethylcytosine-binding protein	HMCES	5.61887	5.63478	5.59888	2.82453	2.82504	2.79883	9.74705	9.76296	9.72707					25	25	25	65	40574	323.31	21636000000	148	354	17.5
1114	5.617	416085	Q1	O94776;O94776-2	O94776;O94776-2	Metastasis-associated protein MTA2	MTA2	5.62125	5.58622	5.64452	2.82692	2.77648	2.84448	10.0975	10.0624	10.1207					50	50	44	69.6	75022	323.31	52134000000	315	668	39
1115	5.616	416051	Q1	O43678;O43678-2	O43678;O43678-2	NADH dehydrogenase [ubiquinone] 1 alpha subcomplex subunit 2	NDUFA2	5.60396	5.61924	5.62612	2.80963	2.80951	2.82607	9.18808	9.20336	9.21024					7	7	7	69.7	10921	95.978	5513300000	33	99	5
1116	5.616	415641	Q1	Q9H0U4;E9PLD0;Q92928	Q9H0U4;E9PLD0	Ras-related protein Rab-1B	RAB1B	5.54028	5.65765	5.6487	2.74595	2.84791	2.84865	9.57156	9.68893	9.67997					17	8	8	38.8	22171	180.86	19971000000	169	201	14
1117	5.614	415060	Q1	P22732;K7EJZ0;K7EIT1;P22732-2;K7EQI3;K7EJR1	P22732	Solute carrier family 2, facilitated glucose transporter member 5	SLC2A5	5.58945	5.67202	5.58118	2.79512	2.86228	2.78113	9.51599	9.59856	9.50772					14	14	14	23.8	54973	79.867	17121000000	59	501	11
1118	5.614	414943	Q1	P09972;A8MVZ9;J3KSV6;J3QKP5;C9J8F3;J3QKK1;K7EKH5	P09972;A8MVZ9	Fructose-bisphosphate aldolase C;Fructose-bisphosphate aldolase	ALDOC	5.59233	5.6524	5.59744	2.798	2.84267	2.79739	9.81991	9.87998	9.82501					31	27	27	75	39455	323.31	33690000000	180	364	22
1119	5.614	414720	Q1	A0A087WUT6;O60841	A0A087WUT6;O60841	Eukaryotic translation initiation factor 5B	EIF5B	5.58763	5.60268	5.65039	2.7933	2.79295	2.85035	10.1804	10.1954	10.2431					83	83	83	61.4	138680	323.31	66812000000	527	1220	51
1120	5.613	414112	Q1	Q14761	Q14761	Protein tyrosine phosphatase receptor type C-associated protein	PTPRCAP	5.58308	5.61288	5.64276	2.78875	2.80315	2.84272	9.1672	9.197	9.22688					5	5	5	39.8	21196	50.7	5293200000	24	206	5
1121	5.612	413686	Q1	O15155;H7C1N3	O15155;H7C1N3	BET1 homolog	BET1	5.5524	5.75023	5.53366	2.75807	2.9405	2.73361	8.91467	9.1125	8.89593					3	3	1	15.3	13289	52.692	3715800000	20	118	3
1122	5.612	413560	Q1	P61006;P61006-2;H0YLJ8;H0YL94;P20337;Q96E17	P61006;P61006-2	Ras-related protein Rab-8A	RAB8A	5.62978	5.61196	5.59445	2.83545	2.80222	2.79441	9.61184	9.59402	9.57651					16	13	10	50.7	23668	313.03	15593000000	87	207	12.5
1123	5.612	413229	Q1	Q15437;Q5QPE2;Q5QPE1	Q15437;Q5QPE2	Protein transport protein Sec23B	SEC23B	5.611	5.63117	5.59321	2.81667	2.82144	2.79316	9.94331	9.96348	9.92551					48	48	44	79.8	86478	323.31	34630000000	327	767	28
1124	5.611	413070	Q1	Q15404;Q15404-2	Q15404;Q15404-2	Ras suppressor protein 1	RSU1	5.57895	5.66198	5.59251	2.78462	2.85224	2.79247	9.54328	9.62631	9.55684					17	17	17	70	31540	157.93	14961000000	112	277	12
1125	5.609	412023	Q1	Q9Y6G9;E9PHI6;C9JGM7;C9JLW1	Q9Y6G9;E9PHI6	Cytoplasmic dynein 1 light intermediate chain 1	DYNC1LI1	5.56743	5.5899	5.67024	2.7731	2.78016	2.87019	9.87583	9.89829	9.97863					43	43	41	72.5	56578	323.31	31349000000	254	523	26.5
1126	5.609	411530	Q1	P53582;H0Y955;H0Y903;H0YAI3;H0Y9L0;D6RF24	P53582	Methionine aminopeptidase 1	METAP1	5.60006	5.61547	5.61191	2.80572	2.80574	2.81187	9.86542	9.88084	9.87727					25	25	25	82.9	43215	323.31	33201000000	200	386	24
1127	5.609	411092	Q1	O95372;Q5QPQ0;Q5QPQ1;Q5QPQ3;Q5QPQ2;Q5QPN9;Q5QPN5	O95372;Q5QPQ0;Q5QPQ1;Q5QPQ3;Q5QPQ2	Acyl-protein thioesterase 2	LYPLA2	5.53602	5.71897	5.57063	2.74169	2.90923	2.77058	9.32426	9.50721	9.35887					13	13	13	62.3	24737	182.17	10823000000	119	231	8
1128	5.609	410763	Q1	P62330	P62330	ADP-ribosylation factor 6	ARF6	5.60046	5.60109	5.62397	2.80613	2.79135	2.82392	9.3887	9.38932	9.41221					14	14	14	76.6	20082	255.29	10698000000	101	175	8
1129	5.607	409917	Q1	H7BZJ3	H7BZJ3		PDIA3	5.68448	5.67417	5.4614	2.89015	2.86444	2.66135	9.52388	9.51356	9.30079					8	1	1	11.4	13519	10.711	14243000000	34	123	9
1130	5.606	409546	Q1	P17066;P48741	P17066;P48741	Heat shock 70 kDa protein 6;Putative heat shock 70 kDa protein 7	HSPA6;HSPA7	5.49648	5.52307	5.79951	2.70215	2.71333	2.99946	9.83648	9.86306	10.1395					15	2	2	3.7	71027	100.03	38678000000	44	643	28.5
1131	5.606	409324	Q1	Q96SI9;Q96SI9-2;Q5JPA5;H0YC91;E9PKQ0	Q96SI9;Q96SI9-2	Spermatid perinuclear RNA-binding protein	STRBP	5.58562	5.60301	5.62965	2.79129	2.79327	2.8296	10.0674	10.0847	10.1114					50	45	45	70.1	73652	323.31	49568000000	325	672	39.5
1132	5.606	408839	Q1	Q8WW12;Q8WW12-2;Q8WW12-3	Q8WW12;Q8WW12-2	PEST proteolytic signal-containing nuclear protein	PCNP	5.54169	5.53775	5.7388	2.74735	2.72802	2.93876	9.35626	9.35232	9.55337					9	9	9	56.7	18925	157.62	10202000000	61	178	8.5
1133	5.606	408761	Q1	Q9UJS0;Q9UJS0-2;R4GN64	Q9UJS0;Q9UJS0-2	Calcium-binding mitochondrial carrier protein Aralar2	SLC25A13	5.55701	5.61235	5.64798	2.76268	2.80261	2.84793	9.97364	10.029	10.0646					44	44	33	61.5	74175	323.31	43059000000	286	675	34
1134	5.605	406628	Q1	Q8TCS8;H7C3C5;H7BXF6;F8WBI3	Q8TCS8	Polyribonucleotide nucleotidyltransferase 1, mitochondrial	PNPT1	5.60337	5.58628	5.62664	2.80904	2.77655	2.82659	10.1118	10.0947	10.135					49	49	49	73.6	85950	323.31	48779000000	372	783	42
1135	5.605	406111	Q1	P43307;P43307-2;C9J3L8;C9J5W0;E9PAL7;C9IZQ1;C9JBX5	P43307;P43307-2;C9J3L8;C9J5W0;E9PAL7;C9IZQ1	Translocon-associated protein subunit alpha	SSR1	5.62542	5.61352	5.57701	2.83109	2.80379	2.77696	9.51057	9.49867	9.46216					5	5	5	22.4	32235	130.28	12445000000	42	286	10
1136	5.605	404929	Q1	P25098;E9PRV7	P25098;E9PRV7	Beta-adrenergic receptor kinase 1	ADRBK1	5.6272	5.57402	5.61304	2.83287	2.76429	2.813	9.98947	9.93629	9.97532					55	55	42	55.6	79573	323.31	36546000000	381	689	30
1137	5.605	404167	Q1	Q9NZL4;Q9NZL4-3;Q9NZL4-2;K7EL16;K7EN20;K7ERT9;K7EKM6;K7EMM7	Q9NZL4;Q9NZL4-3;Q9NZL4-2;K7EL16	Hsp70-binding protein 1	HSPBP1	5.63077	5.60736	5.57564	2.83644	2.79763	2.7756	9.67729	9.65388	9.62216					20	20	20	66.3	39474	205.19	17348000000	148	362	14.5
1138	5.604	404084	Q1	Q13043;F5H5B4;Q13043-2;A0A087WYT4;A0A087WVN8	Q13043;F5H5B4;Q13043-2	Serine/threonine-protein kinase 4;Serine/threonine-protein kinase 4 37kDa subunit;Serine/threonine-protein kinase 4 18kDa subunit	STK4	5.56864	5.61118	5.63322	2.77431	2.80145	2.83318	9.88516	9.92769	9.94974					33	33	25	51.7	55630	323.31	33821000000	223	487	27
1139	5.604	403811	Q1	O14828	O14828	Secretory carrier-associated membrane protein 3	SCAMP3	5.53545	5.62004	5.65559	2.74112	2.81031	2.85555	9.4206	9.50519	9.54074					13	13	2	19.9	38287	257.25	10707000000	74	347	10
1140	5.603	403460	Q1	P21912;A0A087WWT1;A0A087WXX8	P21912;A0A087WWT1;A0A087WXX8	Succinate dehydrogenase [ubiquinone] iron-sulfur subunit, mitochondrial	SDHB	5.47891	5.66791	5.66256	2.68457	2.85818	2.86252	9.51018	9.69919	9.69384					17	17	17	55.7	31629	248.91	17446000000	128	280	14
1141	5.603	403408	Q1	O60488-2;O60488;H0Y9A0;D6RF95;D6RD96;D6RFW9;D6RDA8	O60488-2;O60488	Long-chain-fatty-acid--CoA ligase 4	ACSL4	5.58193	5.61336	5.61249	2.7876	2.80362	2.81244	10.0112	10.0426	10.0417					50	50	48	75.7	74435	323.31	42154000000	350	670	35
1142	5.602	403026	Q1	Q9NR28-2;Q9NR28;A0A024RBT2;F5H796;Q9NR28-3;F5GXT8;F5GYH3;F5GX50;H7BZK7;F5H0Q4;H7BZQ7	Q9NR28-2;Q9NR28;A0A024RBT2;F5H796;Q9NR28-3;F5GXT8	Diablo homolog, mitochondrial	DIABLO	5.58567	5.64249	5.57828	2.79134	2.83276	2.77823	9.47082	9.52764	9.46343					13	13	13	86.6	21232	277.14	12093000000	140	186	10
1143	5.602	402880	Q1	P11166;A6NL68;A0A0D9SG74;A0A0D9SFK9	P11166	Solute carrier family 2, facilitated glucose transporter member 1	SLC2A1	5.55245	5.64922	5.60443	2.75812	2.83948	2.80438	9.55155	9.64831	9.60352					15	15	15	17.7	54083	323.31	16622000000	107	492	13
1144	5.602	402874	Q1	O75663;O75663-2	O75663;O75663-2	TIP41-like protein	TIPRL	5.52816	5.68253	5.59394	2.73383	2.8728	2.7939	9.55944	9.71381	9.62522					15	15	15	68.4	31444	208.23	17235000000	133	272	14
1145	5.601	401631	Q1	O60828;O60828-5;O60828-2;O60828-4;C9JQA1;O60828-3;H7C053;O60828-7;O60828-6;O60828-10;O60828-9;O60828-8	O60828;O60828-5;O60828-2;O60828-4;C9JQA1;O60828-3	Polyglutamine-binding protein 1	PQBP1	5.60035	5.65886	5.54377	2.80601	2.84913	2.74372	9.46322	9.52174	9.40664					10	10	10	55.1	30472	143.92	11427000000	92	265	9.5
1146	5.601	401360	Q1	Q8WWM7;Q8WWM7-6;Q8WWM7-8;Q8WWM7-5;Q8WWM7-4;Q8WWM7-2;Q8WWM7-3;Q8WWM7-7;H3BUE3;H3BSQ5;H3BRB0;A0A0C4DGL7	Q8WWM7;Q8WWM7-6;Q8WWM7-8;Q8WWM7-5;Q8WWM7-4;Q8WWM7-2;Q8WWM7-3	Ataxin-2-like protein	ATXN2L	5.55482	5.59795	5.64932	2.76049	2.78822	2.84928	10.0082	10.0513	10.1027					49	49	2	2.1	113370	323.31	48561000000	319	1075	37
1147	5.6	400968	Q1	Q9NR33	Q9NR33	DNA polymerase epsilon subunit 4	POLE4	5.51111	5.52054	5.76818	2.71677	2.7108	2.96813	9.17441	9.18384	9.43148					5	5	5	73.5	12209	96.839	6361400000	81	117	6
1148	5.6	400715	Q1	Q15286;F5H157;Q15286-2;F5H7F8	Q15286;F5H157;Q15286-2	Ras-related protein Rab-35	RAB35	5.61894	5.62069	5.55994	2.82461	2.81096	2.7599	9.54548	9.54723	9.48649					15	15	15	74.6	23025	301.61	14485000000	104	201	11
1149	5.598	400333	Q1	P62873;P62873-2;B3KVK2;F6UT28;F6X3N5;B1AKQ8;F5H8J8;F5H100;F5H0S8;E9PCP0;P16520-2;P16520	P62873;P62873-2;B3KVK2	Guanine nucleotide-binding protein G(I)/G(S)/G(T) subunit beta-1	GNB1	5.5443	5.62069	5.63003	2.74997	2.81095	2.82998	9.5434	9.61978	9.62912					19	10	10	47.1	37377	323.31	16355000000	63	340	13
1150	5.598	399391	Q1	P00403	P00403	Cytochrome c oxidase subunit 2	MT-CO2	5.52582	5.65169	5.61716	2.73148	2.84196	2.81711	9.31406	9.43993	9.4054					7	7	7	44.9	25565	153.94	11759000000	72	227	8
1151	5.598	399228	Q1	A0A0C4DGS0;P56556;R4GN43	A0A0C4DGS0;P56556;R4GN43	NADH dehydrogenase [ubiquinone] 1 alpha subcomplex subunit 6	NDUFA6	5.59611	5.53398	5.66385	2.80178	2.72425	2.86381	9.38435	9.32222	9.45209					10	10	10	64.8	15136	116.85	9673700000	52	128	8
1152	5.597	398805	Q1	P48637;P48637-2	P48637;P48637-2	Glutathione synthetase	GSS	5.61811	5.55622	5.61802	2.82378	2.74649	2.81797	9.85545	9.79355	9.85535					31	31	31	68.8	52384	323.31	27589000000	202	474	22.5
1153	5.597	398644	Q1	P51398-2;P51398;P51398-3;V9GZ03;V9GYL9;V9GYJ9;V9GYA7;V9GZ61;V9GYC9;V9GYW1;V9GY11;V9GYJ3;V9GYF7;V9GYR8;V9GYL4	P51398-2;P51398;P51398-3;V9GZ03;V9GYL9;V9GYJ9	28S ribosomal protein S29, mitochondrial	DAP3	5.57815	5.58537	5.62871	2.78382	2.77564	2.82866	9.70634	9.71356	9.7569					22	22	22	70	41044	323.31	21724000000	132	357	17.5
1154	5.595	398110	Q1	Q9NUP9;G3V1D4;O14910;H0YIA8;H0YI92;J3KN23;Q9HAP6	Q9NUP9;G3V1D4	Protein lin-7 homolog C	LIN7C	5.55715	5.61747	5.61088	2.76282	2.80774	2.81084	9.46349	9.52381	9.51722					12	12	12	70.1	21834	323.31	11558000000	86	197	10.5
1155	5.595	396655	Q1	Q9P013	Q9P013	Spliceosome-associated protein CWC15 homolog	CWC15	5.53162	5.59345	5.65958	2.73728	2.78372	2.85954	9.31986	9.38169	9.44782					17	17	17	54.6	26624	212.54	10349000000	103	229	8
1156	5.595	396303	Q1	O75940	O75940	Survival of motor neuron-related-splicing factor 30	SMNDC1	5.58707	5.63034	5.56648	2.79274	2.82061	2.76644	9.42646	9.46973	9.40587					6	6	6	41.6	26711	250.81	11870000000	55	238	9
1157	5.595	396269	Q1	Q13217;X6R9L0	Q13217;X6R9L0	DnaJ homolog subfamily C member 3	DNAJC3	5.56925	5.64755	5.56699	2.77492	2.83782	2.76694	9.78684	9.86514	9.78458					44	44	44	70.6	57579	323.31	28650000000	226	504	21.5
1158	5.594	394844	Q1	Q14151;Q14151-2;K7EQU4;K7ERX3	Q14151	Scaffold attachment factor B2	SAFB2	5.57959	5.59213	5.61069	2.78526	2.7824	2.81065	10.0329	10.0455	10.064					79	79	56	44.5	107470	323.31	47867000000	427	953	37
1159	5.594	394679	Q1	P78344;D3DQV9;H0YCH5;H0YD77;H0YEC5;H0YE22;H0YCF8;H0YEN8;H0YDC0;H0YE44;H0YD99;H0YEI7;H0YEW3	P78344;D3DQV9;H0YCH5	Eukaryotic translation initiation factor 4 gamma 2	EIF4G2	5.5933	5.64938	5.53967	2.79897	2.83965	2.73962	10.1774	10.2335	10.1238					69	69	3	5	102360	323.31	64087000000	485	907	50
1160	5.593	394454	Q1	Q9UL25	Q9UL25	Ras-related protein Rab-21	RAB21	5.59303	5.53723	5.65016	2.79869	2.72749	2.85012	9.59212	9.53632	9.64926					13	13	13	62.7	24347	284.47	15341000000	117	225	13
1161	5.593	394382	Q1	A0A0A0MRR7;P09234;Q5TAL2	A0A0A0MRR7;P09234	U1 small nuclear ribonucleoprotein C	SNRPC	5.57095	5.57456	5.63455	2.77662	2.76483	2.8345	9.3012	9.30481	9.3648					4	4	4	22.2	19687	119.02	10053000000	32	180	7
1162	5.593	393960	Q1	Q8N1F7;H3BVG0;Q8N1F7-2;H3BM93;H3BRI8;H3BV11;H3BPA9;H3BNN5;H3BP95;H3BMX0;H3BVE2;H3BRD9;H3BV15;H3BNG7	Q8N1F7;H3BVG0;Q8N1F7-2	Nuclear pore complex protein Nup93	NUP93	5.57623	5.59457	5.60861	2.7819	2.78484	2.80857	10.1603	10.1787	10.1927					62	62	62	74.2	93487	323.31	56962000000	358	819	50
1163	5.592	393789	Q1	Q92905;E5RHH5;E5RFS1;E5RG35;E5RK55;E5RHF2	Q92905	COP9 signalosome complex subunit 5	COPS5	5.58112	5.6017	5.59408	2.78679	2.79196	2.79403	9.69672	9.7173	9.70968					23	23	23	69.2	37578	323.31	20738000000	196	334	17
1164	5.592	393168	Q1	Q8WWY3;E7EVX8;Q8WWY3-4;Q8WWY3-3;Q8WWY3-2;E7EU94;E7ESX0;E7EN72	Q8WWY3;E7EVX8;Q8WWY3-4;Q8WWY3-3;Q8WWY3-2	U4/U6 small nuclear ribonucleoprotein Prp31	PRPF31	5.56356	5.60636	5.60679	2.76923	2.79663	2.80674	9.77093	9.81373	9.81415					27	27	27	58.5	55455	323.31	27341000000	192	499	21
1165	5.592	392961	Q1	Q13409-3;Q13409-2;Q13409-7;Q13409;E7EQL5;E7EV09;E7EQU2;E7ESD3;E7ETL8;E7EMU4;E7ET01;E9PGG1;E7EUM4;E7ERR6;E7ERH4;E7EU01;E5RFE1;C9J3E7;E5RJ75	Q13409-3;Q13409-2;Q13409-7;Q13409;E7EQL5;E7EV09	Cytoplasmic dynein 1 intermediate chain 2	DYNC1I2	5.53059	5.60451	5.64141	2.73626	2.79478	2.84136	9.71677	9.79069	9.82759					34	34	1	3.9	68426	323.31	24832000000	259	612	20
1166	5.591	392939	Q1	P40938;P40938-2;A0A087X270	P40938;P40938-2	Replication factor C subunit 3	RFC3	5.59235	5.63894	5.54281	2.79802	2.8292	2.74277	9.75626	9.80284	9.70672					31	31	31	75.8	40556	323.31	23384000000	178	356	19
1167	5.591	392790	Q1	Q15041;Q15041-3;Q15041-2;H3BTX6	Q15041;Q15041-3;Q15041-2;H3BTX6	ADP-ribosylation factor-like protein 6-interacting protein 1	ARL6IP1	5.54023	5.56157	5.67215	2.74589	2.75184	2.8721	8.96944	8.99079	9.10137					6	6	1	3.4	23362	167.15	4193300000	33	203	3.5
1168	5.59	392759	Q1	Q86X55-1;Q86X55;Q86X55-2;K7EQA8;K7EPK1;K7EK20;K7EIQ8;K7ERM3;K7EQB9	Q86X55-1;Q86X55;Q86X55-2;K7EQA8	Histone-arginine methyltransferase CARM1	CARM1	5.58032	5.52398	5.66626	2.78598	2.71425	2.86621	9.7555	9.69917	9.84144					29	29	29	62.2	63459	323.31	22682000000	182	585	19.5
1169	5.59	392048	Q1	O15042-2;O15042;E7ET15;O15042-3;H0Y8D9;E7EW00;H7C4V2;C9J5L1;C9JDJ7;U3KPT1	O15042-2;O15042;E7ET15;O15042-3	U2 snRNP-associated SURP motif-containing protein	U2SURP	5.58622	5.58501	5.59739	2.79188	2.77528	2.79735	10.0624	10.0612	10.0736					48	48	48	51.3	118230	323.31	46027000000	355	1028	39
1170	5.589	391866	Q1	Q9BYG3;C9J808;C9J6C5;H7BZL0	Q9BYG3;C9J808;C9J6C5	MKI67 FHA domain-interacting nucleolar phosphoprotein	NIFK	5.54992	5.59007	5.62727	2.75558	2.78034	2.82722	9.38931	9.42946	9.46666					18	18	18	66.6	34222	323.31	12287000000	134	293	9
1171	5.589	391474	Q1	Q12974;Q12974-3;Q12974-4;E9PMY3;E9PML8;E9PJC0;E9PRR9;Q12974-2;E9PL34	Q12974;Q12974-3;Q12974-4;E9PMY3;E9PML8;E9PJC0;E9PRR9;Q12974-2	Protein tyrosine phosphatase type IVA 2	PTP4A2	5.52885	5.62422	5.61296	2.73452	2.81449	2.81291	9.15436	9.24974	9.23847		+			10	10	7	43.7	19127	82.849	6634200000	70	167	5.5
1172	5.588	391185	Q1	D6REX3;O94979;O94979-3;O94979-9;O94979-2;O94979-8;O94979-4;O94979-6;O94979-10;D6RHZ5;H7BXG7;O94979-7;O94979-5;H0Y8V7;H0Y9K1;H0Y9T9;H0Y8W8;D6RE64;D6RCQ9;H0YAF5;D6RBT0;D6RHE8;H0Y9V3	D6REX3;O94979;O94979-3;O94979-9;O94979-2;O94979-8;O94979-4;O94979-6;O94979-10;D6RHZ5;H7BXG7;O94979-7;O94979-5	Protein transport protein Sec31A	SEC31A	5.5739	5.63608	5.55397	2.77957	2.82634	2.75392	10.1025	10.1647	10.0826					52	52	30	32.5	136220	323.31	53747000000	401	1251	44
1173	5.588	390382	Q1	P53597;H7C233	P53597	Succinyl-CoA ligase [ADP/GDP-forming] subunit alpha, mitochondrial	SUCLG1	5.53087	5.58962	5.64334	2.73654	2.77988	2.8433	9.56215	9.6209	9.67462					13	13	13	41.9	36249	323.31	16344000000	141	346	14
1174	5.587	389686	Q1	Q99627;E9PGT6;Q99627-2;H7C3S9;F8WEF2	Q99627;E9PGT6;Q99627-2	COP9 signalosome complex subunit 8	COPS8	5.5848	5.629	5.54798	2.79047	2.81927	2.74793	9.31505	9.35925	9.27823					14	14	14	92.8	23225	157.19	9035700000	72	209	7
1175	5.587	389372	Q1	O75131;A0A087WYQ3;H0YB26;E5RHZ0;A0A087WXR6;A0A087WUS8;E5RFT7;E7ENV7;Q86YQ8-2;Q9HCH3-2;Q96A23;O95741;Q86YQ8;Q96A23-2;Q9HCH3;O95741-2	O75131;A0A087WYQ3	Copine-3	CPNE3	5.57357	5.59867	5.58825	2.77924	2.78894	2.78821	9.73748	9.76257	9.75216					28	28	27	60.7	60130	224.46	20890000000	176	537	19
1176	5.587	389252	Q1	Q9UK45;A0A087X2I5;K7ENY5;K7EML7	Q9UK45	U6 snRNA-associated Sm-like protein LSm7	LSM7	5.54209	5.64486	5.57296	2.74776	2.83512	2.77291	9.20539	9.30816	9.23626					7	7	7	84.5	11602	75.048	7854600000	60	103	6
1177	5.586	388666	Q1	Q9UHA4;Q9UHA4-2	Q9UHA4;Q9UHA4-2	Ragulator complex protein LAMTOR3	LAMTOR3	5.54631	5.47463	5.73706	2.75198	2.66489	2.93702	9.24438	9.17269	9.43513					5	5	5	66.9	13623	64.035	8145000000	43	124	6.5
1178	5.586	388515	Q1	J3KR35;Q8WUD4;C9JUN5;S4R331	J3KR35;Q8WUD4;C9JUN5;S4R331	Coiled-coil domain-containing protein 12	CCDC12	5.57078	5.60883	5.57697	2.77645	2.79909	2.77692	9.30103	9.33907	9.30722					16	16	16	62	20501	206.58	9307700000	84	179	7
1179	5.585	387971	Q1	P12236	P12236	ADP/ATP translocase 3;ADP/ATP translocase 3, N-terminally processed	SLC25A6	5.52903	5.60999	5.61695	2.7347	2.80026	2.8169	9.71521	9.79617	9.80313					28	15	9	21.5	32866	154.03	25237000000	140	298	20
1180	5.585	387726	Q1	P13489;H0YCR7;E9PIM9;E9PMJ3;E9PLZ3;E9PIK5;E9PMN0;E9PMA9;E9PR82;E9PMI1	P13489;H0YCR7	Ribonuclease inhibitor	RNH1	5.568	5.57816	5.60953	2.77367	2.76843	2.80949	9.77537	9.78553	9.8169					30	30	30	87.4	49973	323.31	25864000000	156	461	21
1181	5.585	386470	Q1	Q15435;Q15435-2;H7C003;C9JD73;C9J177;Q15435-3;B5MBZ8;Q15435-5;Q15435-4;C9JRC4;H7C118;H7C3Q5	Q15435;Q15435-2;H7C003;C9JD73;C9J177;Q15435-3;B5MBZ8;Q15435-5;Q15435-4	Protein phosphatase 1 regulatory subunit 7	PPP1R7	5.57591	5.57341	5.60591	2.78157	2.76368	2.80587	9.66518	9.66268	9.69518					30	30	30	84.4	41564	323.31	19465000000	158	360	16
1182	5.584	386326	Q1	Q10713;Q10713-2;Q5SXN9	Q10713;Q10713-2	Mitochondrial-processing peptidase subunit alpha	PMPCA	5.57859	5.63488	5.53925	2.78426	2.82515	2.73921	9.87872	9.93501	9.83938					34	34	34	68.2	58252	323.31	33824000000	228	525	26
1183	5.583	385502	Q1	Q9NVP1;H7C452	Q9NVP1	ATP-dependent RNA helicase DDX18	DDX18	5.70011	5.533	5.51672	2.90578	2.72327	2.71667	10.1167	9.94963	9.93335					37	37	37	63.7	75406	323.31	42545000000	318	670	34
1184	5.582	385343	Q1	O60763;O60763-2;REV__R4GMN2	O60763;O60763-2	General vesicular transport factor p115	USO1	5.55481	5.59509	5.59653	2.76047	2.78536	2.79648	10.0734	10.1137	10.1151					47	47	46	55.6	107890	323.31	49983000000	336	962	43
1185	5.58	385118	Q1	Q7Z4W1;J3KS22;J3QS36;J3QL34;J3KRZ4;J3QS45;J3KSZ5;J3QRQ2	Q7Z4W1;J3KS22;J3QS36;J3QL34;J3KRZ4	L-xylulose reductase	DCXR	5.54853	5.61448	5.57603	2.7542	2.80474	2.77598	9.57981	9.64576	9.60731					18	18	18	81.6	25913	109.9	15276000000	126	244	14
1186	5.578	384885	Q1	O00161;O00161-2;H3BM38;H3BNE1;H3BR18;H3BPJ0;H3BV99;H3BP15;H3BQY9;H3BR99;H3BNG6;H3BU94	O00161;O00161-2;H3BM38;H3BNE1;H3BR18;H3BPJ0	Synaptosomal-associated protein 23;Synaptosomal-associated protein	SNAP23	5.56064	5.59252	5.58066	2.76631	2.78279	2.78062	9.40004	9.43191	9.42005					16	16	16	82.9	23354	323.31	10500000000	83	211	9
1187	5.578	383354	Q1	P11413;P11413-2;P11413-3;E9PD92	P11413;P11413-2;P11413-3;E9PD92	Glucose-6-phosphate 1-dehydrogenase	G6PD	5.56152	5.56447	5.60755	2.76719	2.75473	2.8075	9.9969	9.99984	10.0429					48	48	19	34	59256	323.31	40537000000	313	515	35.5
1188	5.578	382443	Q1	Q15003;E9PHA2;C9J470;Q15003-2;C9JZP1;H7C415	Q15003;E9PHA2;C9J470;Q15003-2	Condensin complex subunit 2	NCAPH	5.53507	5.60113	5.59685	2.74074	2.7914	2.79681	9.9321	9.99817	9.99389					43	43	43	69	82562	323.31	37244000000	312	741	32.5
1189	5.577	381238	Q1	Q9Y376;A0A087X0K1	Q9Y376;A0A087X0K1	Calcium-binding protein 39	CAB39	5.5495	5.52612	5.65656	2.75516	2.71639	2.85651	9.7464	9.72303	9.85346					25	25	21	55.1	39869	294.36	24094000000	181	341	20.5
1190	5.577	380647	Q1	P53602;H3BP35;H3BQ47;H3BRZ1;H3BVC4	P53602;H3BP35	Diphosphomevalonate decarboxylase	MVD	5.60194	5.57889	5.55122	2.80761	2.76915	2.75118	9.70458	9.68152	9.65386					27	27	27	79.5	43404	323.31	18090000000	158	400	16.5
1191	5.577	379068	Q1	O15067;H0YGH1;J3QSG0;J3QSH6;J3KT98;J3KTQ5;J3KTL4;J3QL39	O15067	Phosphoribosylformylglycinamidine synthase	PFAS	5.58713	5.59195	5.55183	2.79279	2.78221	2.75179	10.2357	10.2405	10.2004					72	72	72	71.9	144730	323.31	66811000000	493	1338	58
1192	5.577	379012	Q1	Q96PU8;Q96PU8-9;Q96PU8-8;Q96PU8-6;Q96PU8-3;Q96PU8-5;H0YG47;F5GXS8;F5GYM3;H0YGD6;H0YFB7;F5H5U6;F5H8C8;F5GYT7	Q96PU8;Q96PU8-9;Q96PU8-8;Q96PU8-6;Q96PU8-3;Q96PU8-5;H0YG47	Protein quaking	QKI	5.56719	5.59892	5.56347	2.77286	2.78918	2.76342	9.59847	9.63019	9.59475					21	21	21	61.9	37670	257.23	16981000000	126	341	14
1193	5.576	378756	Q1	B7ZM99;Q6UB35;A0A087WVM4;H0Y327;Q6UB35-2;Q4VXM0;Q5JYA8;Q5JYA3;Q4VXM1;Q4VXV2	B7ZM99;Q6UB35;A0A087WVM4	Monofunctional C1-tetrahydrofolate synthase, mitochondrial	MTHFD1L	5.54675	5.61175	5.56868	2.75242	2.80202	2.76863	10.1395	10.2045	10.1614					61	59	59	73.7	105890	323.31	60084000000	477	979	51
1194	5.576	378564	Q1	O60343-2;O60343-3;O60343;O60343-5;O60343-4;Q5JU47	O60343-2;O60343-3;O60343	TBC1 domain family member 4	TBC1D4	5.55106	5.58867	5.5873	2.75673	2.77893	2.78725	10.2286	10.2662	10.2648					76	76	75	63	139550	323.31	71513000000	493	1235	62
1195	5.575	378308	Q1	Q15004;H0YMA4;A0A0U1RQM0;H0YKX3;A0A0U1RQC1;Q15004-2	Q15004;H0YMA4;A0A0U1RQM0;H0YKX3;A0A0U1RQC1;Q15004-2	PCNA-associated factor	KIAA0101	5.69186	5.52894	5.50537	2.89753	2.71921	2.70532	9.31737	9.15445	9.13088					8	8	8	70.3	11986	156.88	6319600000	55	111	5.5
1196	5.575	377863	Q1	Q8N684-3;Q8N684-2;Q8N684;F5H669;F5H6M0;F5H047;J3QT54;C9J286;C9J323;C9JM38;F5H5B7;F5H1W4;F5H2K8;F5H6P5;F5H6A8;F5GXA3	Q8N684-3;Q8N684-2;Q8N684;F5H669;F5H6M0;F5H047	Cleavage and polyadenylation specificity factor subunit 7	CPSF7	5.56721	5.57747	5.58111	2.77288	2.76774	2.78106	9.73111	9.74137	9.74501					20	20	20	42.8	56374	222.24	21945000000	133	514	19
1197	5.575	377415	Q1	Q16763;K7EPJ1;K7EM75	Q16763;K7EPJ1	Ubiquitin-conjugating enzyme E2 S	UBE2S	5.55	5.60103	5.57457	2.75567	2.79129	2.77452	9.49585	9.54688	9.52042					15	15	15	81.5	23845	280.85	12722000000	111	222	11.5
1198	5.575	377200	Q1	Q8N4H5;F8W8Z9;Q8N4H5-3;Q8N4H5-2;H3BUX3;H0YFG9	Q8N4H5;F8W8Z9;Q8N4H5-3;Q8N4H5-2	Mitochondrial import receptor subunit TOM5 homolog	TOMM5	5.56831	5.58873	5.56649	2.77398	2.779	2.76645	9.26637	9.28679	9.26456					9	9	9	88.2	6035.2	38.406	7961000000	59	51	6.5
1199	5.571	376723	Q1	Q9UNF0-2;Q9UNF0;A0A0U1RR22;B0QYG7;B0QYG8;H0Y923	Q9UNF0-2;Q9UNF0;A0A0U1RR22	Protein kinase C and casein kinase substrate in neurons protein 2	PACSIN2	5.58315	5.55246	5.57873	2.78882	2.74272	2.77868	9.83003	9.79933	9.82561					27	27	27	55.3	51353	306.34	26756000000	150	445	23
1200	5.571	376444	Q1	Q6PKG0;Q6PKG0-3;A0A0B4J210;E5RH50;H0YBW1;H0YC33;H0YAN4;E5RHK4;H0YBM7;H0YBR8;H0YAX9;H0YBJ5	Q6PKG0;Q6PKG0-3;A0A0B4J210;E5RH50	La-related protein 1	LARP1	5.54384	5.58814	5.58038	2.74951	2.77841	2.78034	10.1192	10.1635	10.1557					85	85	64	61.8	123510	323.31	57154000000	549	1096	49
1201	5.571	376099	Q1	Q8N1G4;J3KRP5	Q8N1G4	Leucine-rich repeat-containing protein 47	LRRC47	5.54948	5.59161	5.57096	2.75515	2.78187	2.77091	9.89703	9.93915	9.91851					38	38	38	76.3	63472	323.31	32273000000	214	583	29
1202	5.57	375516	Q1	P08574	P08574	Cytochrome c1, heme protein, mitochondrial	CYC1	5.53826	5.59285	5.57859	2.74393	2.78311	2.77854	9.65386	9.70845	9.69418					17	17	17	58.5	35422	323.31	22009000000	161	325	17
1203	5.57	373640	Q1	K7ERV3;K7ES52;K7ERJ1;K7ENW5	K7ERV3;K7ES52;K7ERJ1	Thymidine kinase	TK1	5.57801	5.58007	5.55122	2.78368	2.77033	2.75118	9.41741	9.41946	9.39062					17	17	2	6.4	28594	219.07	10457000000	81	267	9
1204	5.569	372954	Q1	P12270;P12270-2;Q5SWX9	P12270	Nucleoprotein TPR	TPR	5.55892	5.56895	5.57938	2.76459	2.75921	2.77933	10.4775	10.4875	10.4979					148	148	148	56.3	267290	323.31	119490000000	1021	2363	108
1205	5.568	372577	Q1	Q99459	Q99459	Cell division cycle 5-like protein	CDC5L	5.57341	5.58113	5.55051	2.77908	2.7714	2.75046	10.0383	10.0461	10.0154					58	58	58	73.2	92250	323.31	41585000000	345	802	38
1206	5.568	372572	Q1	Q00765;B7Z332;B7Z510;H0Y8J8;E2QRG8;Q00765-2	Q00765	Receptor expression-enhancing protein 5	REEP5	5.57752	5.54112	5.58438	2.78319	2.73138	2.78433	9.24082	9.20442	9.24768					7	7	7	25.9	21493	70.426	7140400000	45	189	6
1207	5.567	372412	Q1	Q9Y5X3;Q5QPE5;Q5QPE4;A0A087WUY5;U3KQL0;U3KQP5;Q9Y5X3-2	Q9Y5X3;Q5QPE5;Q5QPE4	Sorting nexin-5	SNX5	5.56608	5.54939	5.58646	2.77174	2.73966	2.78641	9.68168	9.66499	9.70206					29	28	28	75.5	46816	323.31	18979000000	165	404	17
1208	5.567	371969	Q1	P42126;Q96DC0;P42126-2;H3BS70	P42126;Q96DC0;P42126-2;H3BS70	Enoyl-CoA delta isomerase 1, mitochondrial	ECI1;DCI	5.50076	5.57043	5.63059	2.70642	2.76069	2.83054	9.48282	9.55249	9.61265					12	12	12	55.6	32816	193.61	13374000000	73	302	12.5
1209	5.567	371944	Q1	P01116-2;P01116	P01116-2;P01116	GTPase KRas;GTPase KRas, N-terminally processed	KRAS	5.47886	5.61133	5.61053	2.68453	2.8016	2.81049	9.31825	9.45073	9.44993					11	11	5	21.3	21424	235.18	9870100000	64	188	9
1210	5.567	371519	Q1	Q00796;H0YLA4;H0YKB3;Q00796-2	Q00796;H0YLA4	Sorbitol dehydrogenase	SORD	5.56442	5.60142	5.53379	2.77009	2.79168	2.73374	9.76133	9.79832	9.73069					26	26	26	70	38324	321.13	22875000000	170	357	20.5
1211	5.566	371506	Q1	Q3ZCQ8;Q3ZCQ8-2;Q3ZCQ8-3;M0R2F8;M0R003;M0R0C3;M0R1Y4;M0R047;M0QXC3;M0R2Z3;M0R303;M0R2D2;M0R2Q2	Q3ZCQ8;Q3ZCQ8-2;Q3ZCQ8-3;M0R2F8;M0R003;M0R0C3	Mitochondrial import inner membrane translocase subunit TIM50	TIMM50	5.50741	5.52507	5.66674	2.71307	2.71534	2.86669	9.39256	9.41022	9.55189					19	19	19	47.9	39646	246.28	11188000000	96	353	10
1212	5.565	370819	Q1	O94826	O94826	Mitochondrial import receptor subunit TOM70	TOMM70A	5.54498	5.60421	5.54507	2.75065	2.79448	2.74502	9.92149	9.98073	9.92158					38	38	38	75.8	67454	323.31	37114000000	275	608	31
1213	5.564	370291	Q1	Q15306-2	Q15306-2	Interferon regulatory factor 4	IRF4	5.53744	5.57263	5.58191	2.74311	2.7629	2.78187	9.76501	9.8002	9.80949					27	27	1	8.4	51644	323.31	26196000000	155	450	22
1214	5.563	369899	Q1	Q12849;F5H5I6;H0Y8R1;H0YAK1;Q12849-5;H0YAM1	Q12849;F5H5I6;H0Y8R1;H0YAK1;Q12849-5	G-rich sequence factor 1	GRSF1	5.56795	5.55272	5.56927	2.77362	2.74299	2.76922	9.81483	9.7996	9.81615					31	31	31	72.9	53126	323.31	28845000000	294	480	23
1215	5.562	369465	Q1	P30419;P30419-2;K7EN82;B7Z8J4;Q5VUC6;O60551;K7EN42	P30419;P30419-2	Glycylpeptide N-tetradecanoyltransferase 1	NMT1	5.53493	5.53374	5.61754	2.7406	2.72401	2.81749	9.71012	9.70892	9.79272					24	24	24	47.2	56806	323.31	24082000000	167	496	19.5
1216	5.562	369338	Q1	P35613-2;P35613;A0A087X2B5;P35613-4;I3L192;A0A087WUV8;P35613-3;R4GMX5;R4GN83	P35613-2;P35613;A0A087X2B5;P35613-4;I3L192;A0A087WUV8;P35613-3	Basigin	BSG	5.49771	5.59665	5.59057	2.70337	2.78692	2.79052	9.46204	9.56098	9.5549					9	9	9	50.2	29221	199.31	13013000000	82	269	12
1217	5.56	367845	Q1	Q9Y295;H0YI06;F8WEE0	Q9Y295	Developmentally-regulated GTP-binding protein 1	DRG1	5.58792	5.57153	5.52118	2.79359	2.76179	2.72113	9.8348	9.8184	9.76805					29	29	28	75.2	40542	323.31	24996000000	163	367	23
1218	5.56	366786	Q1	O95232;J3KPP4;D6RDI2;C9JL41;O95232-2;H0YA81;D6RHH0;H7C5U7;U3KQT3;E7EN55;H0YBV7;H0YAR4	O95232;J3KPP4	Luc7-like protein 3	LUC7L3	5.52529	5.58459	5.56933	2.73096	2.77486	2.76928	9.71147	9.77077	9.75551					30	30	30	51.2	51466	323.31	26380000000	189	432	20
1219	5.559	366389	Q1	Q6JBY9;B7ZKW8;F6T4W9;Q6JBY9-2	Q6JBY9;B7ZKW8	CapZ-interacting protein	RCSD1	5.54676	5.5953	5.53531	2.75243	2.78557	2.73526	9.71067	9.75921	9.69921					26	26	26	75.2	44503	323.31	20018000000	183	416	19
1220	5.557	366333	Q1	Q13310-2;Q13310-3;H0Y5F5;H0YEU6;H0Y6X6	Q13310-2;Q13310-3;H0Y5F5	Polyadenylate-binding protein 4;Polyadenylate-binding protein	PABPC4	5.5482	5.5581	5.56616	2.75387	2.74837	2.76611	9.96483	9.97473	9.98279					42	24	3	5.2	69578	214.98	39365000000	173	631	34
1221	5.557	365912	Q1	Q12912	Q12912	Lymphoid-restricted membrane protein;Processed lymphoid-restricted membrane protein	LRMP	5.49272	5.62246	5.55532	2.69839	2.81273	2.75527	9.89639	10.0261	9.95898					42	42	1	4.7	62121	323.31	36814000000	274	555	33
1222	5.556	364020	Q1	Q14165;F5H1S8;H0YG07;F5GX14	Q14165;F5H1S8;H0YG07	Malectin	MLEC	5.50055	5.61829	5.54914	2.70621	2.80856	2.74909	9.46488	9.58262	9.51347					20	20	20	53.1	32233	323.31	13440000000	121	292	12
1223	5.555	363460	Q1	Q9UQE7	Q9UQE7	Structural maintenance of chromosomes protein 3	SMC3	5.55464	5.56117	5.54839	2.76031	2.75144	2.74834	10.2527	10.2592	10.2464					96	96	96	70.3	141540	323.31	71638000000	578	1217	65
1224	5.554	363133	Q1	Q96M27;Q96M27-3;Q96M27-2;Q96M27-5;Q96M27-4	Q96M27;Q96M27-3;Q96M27-2;Q96M27-5	Protein PRRC1	PRRC1	5.59789	5.56242	5.50147	2.80356	2.75269	2.70142	9.56222	9.52675	9.4658					12	12	12	34.8	46701	287.69	14744000000	97	445	12
1225	5.554	363005	Q1	Q06187;Q06187-2;U3NG26;Q5JY90;J3KR66;F8W9W0;C9JXA2;Q96L35;B1AKC9;F8VP57;B7ZKW7;B7ZKJ3;A0A0B4J1T8;Q9UF33-2;Q9UF33-3;P54762-5;P54756-3;P29317;P29320;P54762;P29323-2;P54760;P29323-3;Q15375-2;Q15375-4;Q15375;P29322;P54756-2;Q9UF33;P54756;P29323	Q06187;Q06187-2;U3NG26;Q5JY90	Tyrosine-protein kinase BTK;Non-specific protein-tyrosine kinase	BTK	5.54256	5.57416	5.54498	2.74823	2.76443	2.74494	10.0075	10.0391	10.0099				+	55	55	54	81.5	76280	323.31	40850000000	304	659	38
1226	5.554	361988	Q1	P28482;P28482-2	P28482;P28482-2	Mitogen-activated protein kinase 1	MAPK1	5.57479	5.55341	5.53261	2.78046	2.74368	2.73256	9.7717	9.75032	9.72951					28	28	21	65.8	41389	323.31	20394000000	181	360	20.5
1227	5.553	361034	Q1	Q8NE71;Q8NE71-2;H0YGW7;Q5STZ8;A0A0G2JIC2;F5GYK6	Q8NE71;Q8NE71-2;H0YGW7	ATP-binding cassette sub-family F member 1	ABCF1	5.55763	5.5633	5.53941	2.7633	2.75357	2.73937	9.99908	10.0047	9.98087					51	50	50	65.8	95925	323.31	42652000000	323	845	36
1228	5.553	359528	Q1	A0A0A6YYL4;P57737-3;I3L167;E7EP81;I3L442;I3L0X9;I3L3T0;Q9Y3D7;I3L1U7;I3L351;I3L2Y6;I3L426;I3L359;I3L0X8;I3L1M1;I3NI06;I3L1G9;A0A0B4J298	A0A0A6YYL4;P57737-3	Coronin;Coronin-7	CORO7-PAM16;CORO7	5.53945	5.57209	5.54738	2.74511	2.76235	2.74733	10.0267	10.0593	10.0346					50	50	7	7.8	114160	323.31	42196000000	292	1048	40
1229	5.552	358728	Q1	A0A0C4DG89;D6RJA6;H0Y9U3	A0A0C4DG89		DDX46	5.52055	5.60052	5.53412	2.72622	2.79079	2.73407	10.13	10.2099	10.1435					71	71	1	1.9	117460	323.31	58452000000	487	1032	53
1230	5.551	358516	Q1	P80723;P80723-2;U3KQP0	P80723;P80723-2	Brain acid soluble protein 1	BASP1	5.50648	5.55288	5.59497	2.71214	2.74314	2.79492	9.45232	9.49872	9.54082					19	19	19	88.1	22693	323.31	13760000000	148	227	11.5
1231	5.551	358213	Q1	P17096-2	P17096-2	High mobility group protein HMG-I/HMG-Y	HMGA1	5.26252	5.6606	5.7304	2.46819	2.85087	2.93035	8.84664	9.24472	9.31452					6	1	1	14.6	10679	6.8855	5547100000	27	96	5
1232	5.551	358156	Q1	Q9Y3D9	Q9Y3D9	28S ribosomal protein S23, mitochondrial	MRPS23	5.4792	5.58056	5.59368	2.68486	2.77082	2.79363	9.44353	9.54489	9.55801					15	15	3	18.9	21770	323.31	13033000000	82	190	12
1233	5.551	358052	Q1	Q9BXV9;H0YJA8	Q9BXV9	Uncharacterized protein C14orf142	C14orf142	5.62628	5.52542	5.50149	2.83195	2.71569	2.70145	9.2104	9.10955	9.08561					7	7	7	94	10859	78.75	5867400000	44	100	5
1234	5.55	357739	Q1	Q08623;Q08623-4;E7EVH9;Q08623-3;Q08623-2	Q08623;Q08623-4;E7EVH9;Q08623-3;Q08623-2	Pseudouridine-5-phosphatase	HDHD1	5.59439	5.54118	5.51579	2.80006	2.73145	2.71574	9.43379	9.38057	9.35518					13	13	13	91.2	25249	252.75	10515000000	121	228	9
1235	5.549	357639	Q1	Q15126	Q15126	Phosphomevalonate kinase	PMVK	5.58112	5.52157	5.54527	2.78679	2.71184	2.74523	9.54546	9.48591	9.50961					15	15	15	65.6	21995	192.2	11594000000	89	192	12
1236	5.549	357433	Q1	Q9HD45;Q5TB53	Q9HD45;Q5TB53	Transmembrane 9 superfamily member 3	TM9SF3	5.56964	5.56616	5.51059	2.77531	2.75643	2.71055	9.67227	9.6688	9.61323					21	21	21	30.2	67887	323.31	18003000000	114	589	16.5
1237	5.549	357403	Q1	Q6IAA8;F5GX19;F5H3Y3;H0YFI1;F5H479	Q6IAA8;F5GX19;F5H3Y3	Ragulator complex protein LAMTOR1	LAMTOR1	5.56354	5.46636	5.61569	2.7692	2.65662	2.81564	9.35178	9.2546	9.40393					9	9	9	83.2	17745	127.83	7989600000	60	161	8
1238	5.548	357223	Q1	O00483	O00483	Cytochrome c oxidase subunit NDUFA4	NDUFA4	5.54452	5.46976	5.62876	2.75019	2.66003	2.82871	9.20782	9.13306	9.29206					5	5	5	46.9	9369.7	20.664	5611700000	22	81	6
1239	5.547	357151	Q1	P21291;E9PS42;E9PND2;E9PP21	P21291;E9PS42;E9PND2;E9PP21	Cysteine and glycine-rich protein 1	CSRP1	5.50386	5.62647	5.51035	2.70953	2.81673	2.7103	9.4102	9.5328	9.41669					13	13	13	64.8	20567	323.31	10651000000	98	193	10.5
1240	5.545	356950	Q1	Q9H0A0;Q9H0A0-2;A0A087WV29;E9PMU0;E9PJN6	Q9H0A0;Q9H0A0-2;A0A087WV29	N-acetyltransferase 10	NAT10	5.52951	5.57803	5.52888	2.73518	2.76829	2.72884	10.0959	10.1444	10.0953					65	65	65	69.9	115730	323.31	53203000000	477	1025	48
1241	5.545	356894	Q1	P19387;H3BRR2	P19387	DNA-directed RNA polymerase II subunit RPB3	POLR2C	5.52253	5.5451	5.56876	2.7282	2.73536	2.76871	9.55381	9.57638	9.60004					18	18	18	79.6	31441	273.56	14142000000	88	275	14
1242	5.545	356206	Q1	P11049-2;P11049;M0QZP6;B7ZAN3;P11049-3	P11049-2;P11049;M0QZP6;B7ZAN3;P11049-3	Leukocyte antigen CD37;Tetraspanin	CD37	5.57099	5.63612	5.42798	2.77666	2.82639	2.62793	9.45614	9.52127	9.31313					7	7	7	30.5	23996	323.31	10869000000	52	213	10
1243	5.545	355344	Q1	E5RGX5;Q93045;Q93045-2	E5RGX5;Q93045;Q93045-2	Stathmin;Stathmin-2	STMN2	5.69901	5.64493	5.29111	2.90468	2.8352	2.49107	9.58416	9.53008	9.17627					6	1	1	6	19574	3.0059	16226000000	20	168	10
1244	5.545	354827	Q1	O15514;E9PB93;E9PHV4	O15514;E9PB93;E9PHV4	DNA-directed RNA polymerase II subunit RPB4	POLR2D	5.6502	5.53189	5.45277	2.85587	2.72216	2.65272	9.38045	9.26214	9.18301					12	12	12	90.1	16311	164.35	6493300000	80	142	7
1245	5.545	354510	Q1	Q13098;C9JFE4;Q13098-5;Q13098-7;Q13098-6	Q13098;C9JFE4;Q13098-5;Q13098-7;Q13098-6	COP9 signalosome complex subunit 1	GPS1	5.5268	5.56835	5.53966	2.73246	2.75861	2.73961	9.66722	9.70877	9.68008					28	28	3	4.9	55536	323.31	20970000000	163	491	18
1246	5.545	353552	Q1	P82909;D6R941	P82909	28S ribosomal protein S36, mitochondrial	MRPS36	5.52306	5.61286	5.49874	2.72872	2.80312	2.69869	9.10718	9.19698	9.08286					6	6	6	72.8	11466	122.89	6062900000	41	103	5
1247	5.545	352949	Q1	P30084	P30084	Enoyl-CoA hydratase, mitochondrial	ECHS1	5.5496	5.51918	5.56527	2.75526	2.70945	2.76522	9.69002	9.6596	9.70569					15	15	15	65.9	31387	288.29	19287000000	151	290	18
1248	5.545	352095	Q1	Q96QK1;I3L4S0;A0A1W2PP10;I3L4P4	Q96QK1	Vacuolar protein sorting-associated protein 35	VPS35	5.53864	5.49566	5.59939	2.74431	2.68593	2.79934	10.047	10.0041	10.1078					44	44	44	61.3	91706	323.31	44272000000	307	796	42
1249	5.544	351927	Q1	P08240;P08240-2	P08240;P08240-2	Signal recognition particle receptor subunit alpha	SRPR	5.56761	5.58322	5.48183	2.77327	2.77349	2.68178	9.98423	9.99985	9.89846					47	47	47	69.9	69810	323.31	37675000000	332	638	34
1250	5.544	351634	Q1	Q12965;H0YNQ8;H0YLE5;H0YN00;H0YNB0;M0QXU2;M0QXE0	Q12965	Unconventional myosin-Ie	MYO1E	5.54845	5.54231	5.54083	2.75412	2.73258	2.74078	10.197	10.1909	10.1894					72	72	56	52.7	127060	323.31	63223000000	444	1108	58
1251	5.544	351457	Q1	Q14061;H7C4E5;C9J8T6	Q14061;H7C4E5;C9J8T6	Cytochrome c oxidase copper chaperone	COX17	5.50223	5.38621	5.74301	2.7079	2.57648	2.94296	8.98945	8.87342	9.23022					4	4	4	81	6915.1	109.53	5073000000	44	63	4
1252	5.544	350980	Q1	P11908-2;H7C540	P11908-2			5.47501	5.52747	5.62863	2.68067	2.71773	2.82859	9.56428	9.61674	9.7179					24	11	1	3.4	35054	217.26	16521000000	61	321	16
1253	5.543	350833	Q1	Q9P287;Q9P287-3	Q9P287;Q9P287-3	BRCA2 and CDKN1A-interacting protein	BCCIP	5.53366	5.53278	5.56398	2.73932	2.72305	2.76394	9.67408	9.6732	9.70441					19	19	5	19.1	35979	323.31	22091000000	166	314	18
1254	5.542	350261	Q1	Q7Z5R6;Q7Z5R6-2	Q7Z5R6	Amyloid beta A4 precursor protein-binding family B member 1-interacting protein	APBB1IP	5.52344	5.55023	5.55302	2.7291	2.7405	2.75298	9.73081	9.7576	9.76039					28	28	27	42	73182	323.31	20869000000	159	666	21
1255	5.541	349846	Q1	P50570-5;K7ENE7;K7EMR9	P50570-5			5.53232	5.5279	5.5623	2.73799	2.71817	2.76225	10.0987	10.0943	10.1287					54	54	1	1.3	97976	323.31	52160000000	383	869	48
1256	5.54	349719	Q1	X6RAL5;O00422;H7BZW6;U3KQ12;U3KPY7	X6RAL5;O00422;H7BZW6	Histone deacetylase complex subunit SAP18	SAP18	5.51849	5.62602	5.47439	2.72415	2.81628	2.67435	9.44503	9.55256	9.40094					14	14	14	67.4	19526	187.76	11916000000	119	172	11
1257	5.539	349538	Q1	O75400;O75400-2;F5H578;H7C2N3;F8VU11;Q6NWY9-2;Q6NWY9-3;Q6NWY9	O75400;O75400-2	Pre-mRNA-processing factor 40 homolog A	PRPF40A	5.52127	5.57396	5.5215	2.72694	2.76423	2.72146	9.92493	9.97762	9.92517					41	41	2	2.9	108800	323.31	35044000000	201	957	33
1258	5.539	348685	Q1	Q8NFH3;Q8NFH3-2;B4E301;F5H0E3;B4DVD1	Q8NFH3;Q8NFH3-2	Nucleoporin Nup43	NUP43	5.4993	5.51202	5.60517	2.70497	2.70228	2.80512	9.3387	9.35141	9.44456					9	9	9	37.1	42150	323.31	9852000000	65	380	9
1259	5.538	347898	Q1	Q13595;Q13595-3;Q13595-4;Q13595-2	Q13595;Q13595-3;Q13595-4;Q13595-2	Transformer-2 protein homolog alpha	TRA2A	5.49671	5.48032	5.63605	2.70237	2.67058	2.836	9.3361	9.31971	9.47544					17	15	15	45.4	32688	130.95	10701000000	61	282	9
1260	5.538	347626	Q1	P52701;P52701-3;P52701-4;P52701-2;A0A087WWJ1;A0A087WYT6;F8WAX8;C9JH55;C9J8Y8;C9J7Y7;U3KQ72;F8W7G9	P52701;P52701-3;P52701-4;P52701-2;A0A087WWJ1	DNA mismatch repair protein Msh6	MSH6	5.54947	5.54624	5.51684	2.75514	2.73651	2.7168	10.1981	10.1948	10.1654					81	81	81	69	152780	323.31	62172000000	533	1360	58
1261	5.537	346440	Q1	Q9GZZ9;E7EQ61;Q9GZZ9-2;E7EWE1;C9J5W5;C9JRV9;C9J0F6;D6RJC9	Q9GZZ9;E7EQ61;Q9GZZ9-2;E7EWE1;C9J5W5	Ubiquitin-like modifier-activating enzyme 5	UBA5	5.56454	5.54014	5.50761	2.77021	2.73041	2.70757	9.65381	9.62941	9.59688					16	16	16	61.4	44863	323.31	17883000000	124	404	16
1262	5.537	346264	Q1	Q9NYB0;H3BMI8	Q9NYB0	Telomeric repeat-binding factor 2-interacting protein 1	TERF2IP	5.48875	5.56682	5.55515	2.69442	2.75709	2.7551	9.69612	9.77419	9.76252					35	35	35	78.2	44259	323.31	22028000000	240	399	21
1263	5.537	345337	Q1	O75955;O75955-2;A0A140T9R1;A2AB10;A0A140T9X0;A2AB09;A2AB12;A0A140T9W4;A0A140T959;A0A140T9C3;A2AB13;A0A0G2JJQ6;A2AB11;A0A140T974;A0A140T9B1;A0A140T957;A0A140T910;A0A140T905;A2ABJ5;A0A140T907	O75955;O75955-2;A0A140T9R1;A2AB10;A0A140T9X0;A2AB09;A2AB12	Flotillin-1	FLOT1	5.50248	5.52809	5.57938	2.70814	2.71836	2.77933	9.56372	9.58934	9.64062					32	32	32	81.3	47355	323.31	15050000000	183	427	15
1264	5.537	345187	Q1	P33176;C9JWB9	P33176	Kinesin-1 heavy chain	KIF5B	5.53604	5.5279	5.54557	2.74171	2.71816	2.74552	10.1993	10.1912	10.2089					74	74	57	54.5	109680	323.31	60626000000	482	963	60
1265	5.536	345167	Q1	P23258;Q9NRH3;K7EIS0;K7EKE5	P23258;Q9NRH3	Tubulin gamma-1 chain;Tubulin gamma-2 chain	TUBG1;TUBG2	5.46281	5.58997	5.5557	2.66848	2.78023	2.75565	9.6804	9.80756	9.77329					33	33	33	84.9	51169	323.31	23668000000	191	451	21.5
1266	5.536	345014	Q1	Q93009-3;Q93009;H3BND8;F5H2X1;H3BRA2;H3BUV0;H3BTM1;H3BQD1;I3L2D8;H3BMF6;REV__J3QKR9;REV__Q86YS3	Q93009-3;Q93009;H3BND8	Ubiquitin carboxyl-terminal hydrolase 7;Ubiquitin carboxyl-terminal hydrolase	USP7	5.50213	5.53596	5.5703	2.70779	2.72622	2.77025	10.1866	10.2204	10.2548					84	84	84	76.2	126270	323.31	66735000000	581	1086	63
1267	5.536	344958	Q1	Q96GG9;C9JVE2;C9J8R4;C9JRU6;C9J0B2;C9JUW4;F8WC32;C9JRE2;C9JAV2;H7C216;Q6PH85-2;Q6PH85	Q96GG9;C9JVE2;C9J8R4	DCN1-like protein 1;DCN1-like protein	DCUN1D1	5.51306	5.5038	5.5909	2.71872	2.69407	2.79085	9.51215	9.50289	9.58999					18	18	18	48.3	30124	323.31	15756000000	96	259	13
1268	5.536	344913	Q1	Q7RTV0	Q7RTV0	PHD finger-like domain-containing protein 5A	PHF5A	5.54613	5.48492	5.57595	2.7518	2.67519	2.77591	9.33437	9.27316	9.3642					11	11	11	70.9	12405	81.654	8627500000	89	110	8
1269	5.534	344590	Q1	O95881;V9GY50;V9GYV4	O95881	Thioredoxin domain-containing protein 12	TXNDC12	5.44874	5.5861	5.56693	2.65441	2.77637	2.76688	9.33389	9.47125	9.45208					9	9	9	67.4	19206	127.09	12200000000	71	172	10
1270	5.532	344365	Q1	Q13123;E7EQZ7;D6REL4;D6RCQ4;D6RAY9;A0A0C4DGW5	Q13123;E7EQZ7	Protein Red	IK	5.52409	5.52586	5.54584	2.72975	2.71613	2.74579	9.66451	9.66628	9.68626					41	41	41	60.5	65601	323.31	18784000000	212	557	18
1271	5.532	344004	Q1	O00264;O00264-2	O00264;O00264-2	Membrane-associated progesterone receptor component 1	PGRMC1	5.53671	5.57056	5.48802	2.74237	2.76083	2.68797	9.23477	9.26862	9.18608					12	11	11	60.5	21671	106.31	7537600000	46	195	6.5
1272	5.531	341251	Q1	Q15121;Q15121-2;B1AKZ5	Q15121;Q15121-2;B1AKZ5	Astrocytic phosphoprotein PEA-15	PEA15	5.50437	5.53223	5.55769	2.71004	2.72249	2.75764	9.23462	9.26248	9.28794					10	10	10	82.3	15040	270.36	7110500000	54	130	7
1273	5.531	340441	Q1	Q13303-2;Q5TG80	Q13303-2;Q5TG80	Voltage-gated potassium channel subunit beta-2	KCNAB2	5.51285	5.53821	5.54251	2.71851	2.72848	2.74247	9.58833	9.61369	9.618					23	23	1	2.8	39287	323.31	15663000000	135	353	15.5
1274	5.53	340387	Q1	Q96PZ0;E7EUH7;H0Y863	Q96PZ0;E7EUH7	Pseudouridylate synthase 7 homolog	PUS7	5.54631	5.49446	5.54786	2.75198	2.68473	2.74781	9.92282	9.87098	9.92437					50	50	50	77.6	75035	323.31	32055000000	303	661	31
1275	5.53	339928	Q1	Q9H307;Q9H307-2;G3V5F0;G3V579	Q9H307;Q9H307-2	Pinin	PNN	5.48447	5.5329	5.57119	2.69014	2.72317	2.77114	9.84675	9.89517	9.93346					40	40	40	55.1	81613	323.31	34495000000	265	717	30
1276	5.529	339597	Q1	Q15050	Q15050	Ribosome biogenesis regulatory protein homolog	RRS1	5.52452	5.53799	5.52319	2.73019	2.72825	2.72315	9.66494	9.67841	9.66362					24	24	23	59.5	41193	323.31	18785000000	158	365	18
1277	5.528	339034	Q1	Q15785	Q15785	Mitochondrial import receptor subunit TOM34	TOMM34	5.54552	5.4866	5.5519	2.75118	2.67687	2.75185	9.68594	9.62703	9.69232					27	27	27	74.1	34559	323.31	17288000000	150	309	18
1278	5.527	338310	Q1	P49247	P49247	Ribose-5-phosphate isomerase	RPIA	5.53118	5.57327	5.4771	2.73685	2.76353	2.67706	9.69509	9.73717	9.64101					18	18	18	53.1	33269	308.24	20262000000	111	311	19
1279	5.527	338052	Q1	Q13596;Q13596-2;Q13596-3;H0YK42;H0YKT3;H0YK58;H0YK43;J3KPH4;H0YKD5;H0YKL5	Q13596;Q13596-2;Q13596-3;H0YK42	Sorting nexin-1	SNX1	5.54058	5.52446	5.51633	2.74624	2.71473	2.71629	9.78745	9.77134	9.76321					29	29	27	58.4	59069	303.07	23985000000	148	522	23
1280	5.527	338032	Q1	Q9GZL7	Q9GZL7	Ribosome biogenesis protein WDR12	WDR12	5.48679	5.57088	5.52335	2.69246	2.76114	2.72331	9.71436	9.79845	9.75093					23	23	23	75.9	47707	323.31	22137000000	143	423	22
1281	5.527	337768	Q1	O75569;O75569-3;O75569-2;G5E9Q4;F8WEG8;C9JMM3	O75569;O75569-3;O75569-2;G5E9Q4	Interferon-inducible double-stranded RNA-dependent protein kinase activator A	PRKRA	5.47649	5.58797	5.51606	2.68215	2.77824	2.71601	9.45855	9.57003	9.49812					20	20	20	55	34404	323.31	13217000000	128	313	12.5
1282	5.525	337591	Q1	O43633;M0R1L7;M0R1T5;M0QXX8	O43633;M0R1L7;M0R1T5;M0QXX8	Charged multivesicular body protein 2a	CHMP2A	5.5331	5.50169	5.53899	2.73876	2.69195	2.73894	9.37249	9.34108	9.37838					14	14	14	37.8	25104	170.07	9741800000	80	222	9
1283	5.524	337579	Q1	P06239;P06239-3;Q573B4;P06239-2;E9PJ92;E9PAP0;F8W6B9;E9PKQ8	P06239;P06239-3;Q573B4;P06239-2;E9PJ92	Tyrosine-protein kinase Lck;Non-specific protein-tyrosine kinase	LCK	5.46054	5.51032	5.60226	2.6662	2.70059	2.80221	9.68811	9.73789	9.82983				+	27	26	25	66.8	58000	323.31	22970000000	203	509	22
1284	5.523	336697	Q1	E7EVA0;P27816-2;P27816-4;B5MEG9;H0Y2V1;F8W9U4;H7C456;A0A0J9YVV8;A0A0J9YW37;P27816-7;P27816-3	E7EVA0;P27816-2	Microtubule-associated protein;Microtubule-associated protein 4	MAP4	5.50471	5.51598	5.54924	2.71038	2.70625	2.74919	10.3392	10.3505	10.3838					98	98	32	19.6	245440	323.31	95818000000	687	2297	89
1285	5.521	334885	Q1	Q9H0R4;K7ER15;K7EMY7;K7EQD2;K7EJQ8;A0A1B0GXB1;Q9H0R4-2;K7EKX8	Q9H0R4;K7ER15;K7EMY7;K7EQD2;K7EJQ8;A0A1B0GXB1;Q9H0R4-2	Haloacid dehalogenase-like hydrolase domain-containing protein 2	HDHD2	5.48752	5.53563	5.54009	2.69318	2.7259	2.74004	9.15082	9.19893	9.20339					10	10	10	58.7	28536	95.821	5992700000	85	259	6
1286	5.52	333983	Q1	Q9Y3C4;Q9Y3C4-3;Q9Y3C4-2	Q9Y3C4;Q9Y3C4-3;Q9Y3C4-2	EKC/KEOPS complex subunit TPRKB	TPRKB	5.48031	5.53216	5.54822	2.68598	2.72242	2.74817	9.26855	9.32039	9.33646					9	9	9	69.7	19661	272.18	8119900000	70	175	8
1287	5.52	332446	Q1	P38606;P38606-2;C9JVW8;C9JA17	P38606;P38606-2	V-type proton ATPase catalytic subunit A	ATP6V1A	5.49137	5.55008	5.51781	2.69704	2.74035	2.71776	9.908	9.96671	9.93444					41	41	41	82	68303	323.31	34158000000	387	617	34
1288	5.519	332035	Q1	Q8TDP1;H0YEF3;E9PN81;H0YE52;H0YCP5;E9PKP0	Q8TDP1;H0YEF3;E9PN81;H0YE52;H0YCP5	Ribonuclease H2 subunit C	RNASEH2C	5.55495	5.52882	5.47376	2.76062	2.71909	2.67371	9.34319	9.31706	9.262					13	13	13	88.4	17840	71.831	8086700000	59	164	8
1289	5.518	331498	Q1	Q9NQG5;A2A2M0;A0A087X2D2;E9PIQ9;E9PQF3;A0A087WUK3	Q9NQG5	Regulation of nuclear pre-mRNA domain-containing protein 1B	RPRD1B	5.51371	5.46969	5.57114	2.71937	2.65995	2.77109	9.54499	9.50096	9.60242					19	19	17	65.3	36899	181.43	13322000000	110	326	14
1290	5.517	331450	Q1	Q9BVK6	Q9BVK6	Transmembrane emp24 domain-containing protein 9	TMED9	5.49157	5.56632	5.49406	2.69724	2.75658	2.69402	9.52285	9.5976	9.52534					9	8	8	40	27277	155.03	14339000000	54	235	14
1291	5.517	331262	Q1	G3V5T9;P24941;P24941-2;E7ESI2;G3V317;K7EJ83	G3V5T9;P24941;P24941-2;E7ESI2	Cyclin-dependent kinase 2	CDK2	5.57439	5.45006	5.52679	2.78005	2.64033	2.72674	9.71481	9.59049	9.66721					26	24	22	61.3	39178	222.71	16673000000	140	346	18
1292	5.517	331212	Q1	P36543;P36543-3;P36543-2;C9J8H1;Q96A05	P36543;P36543-3;P36543-2;C9J8H1	V-type proton ATPase subunit E 1	ATP6V1E1	5.55063	5.52913	5.47142	2.75629	2.71939	2.67138	9.49647	9.47497	9.41727					22	22	22	77.4	26145	323.31	12078000000	191	226	11.5
1293	5.516	331177	Q1	Q96AB3;Q96AB3-2;K7EKW4;K7ENV7;Q96AB3-3	Q96AB3;Q96AB3-2;K7EKW4;K7ENV7;Q96AB3-3	Isochorismatase domain-containing protein 2, mitochondrial	ISOC2	5.53737	5.57364	5.43828	2.74304	2.76391	2.63823	9.26762	9.30389	9.16853					11	11	11	92.7	22337	323.31	8324500000	82	205	7
1294	5.515	330161	Q1	O60749;O60749-2;D6RC15	O60749;O60749-2	Sorting nexin-2	SNX2	5.5169	5.50465	5.52369	2.72257	2.69491	2.72364	9.79999	9.78774	9.80678					28	26	26	54.9	58470	265.66	26541000000	164	519	25
1295	5.514	329891	Q1	Q32MZ4-2;Q32MZ4-3;Q32MZ4;Q32MZ4-4;C9JTC6	Q32MZ4-2;Q32MZ4-3;Q32MZ4	Leucine-rich repeat flightless-interacting protein 1	LRRFIP1	5.48202	5.55222	5.50663	2.68769	2.74248	2.70658	9.88568	9.95588	9.91029					43	43	41	54	86403	323.31	37233000000	302	784	33
1296	5.514	329859	Q1	O95758-1	O95758-1	Polypyrimidine tract-binding protein 3	PTBP3	5.50884	5.54309	5.48865	2.7145	2.73336	2.6886	9.62444	9.65869	9.60425					22	19	2	3.1	56501	323.31	18448000000	149	521	17
1297	5.513	329102	Q1	Q6UXN9;C9JBU3	Q6UXN9	WD repeat-containing protein 82	WDR82	5.43219	5.57399	5.53381	2.63786	2.76425	2.73377	9.54779	9.68958	9.64941					19	19	19	73.2	35079	323.31	16708000000	119	313	17
1298	5.513	327454	Q1	Q9NVP2;K7ES22;K7ELW9;K7EIL9;K7EM93	Q9NVP2;K7ES22	Histone chaperone ASF1B	ASF1B	5.49947	5.54494	5.49481	2.70513	2.73521	2.69476	9.31404	9.35951	9.30937					9	9	8	84.2	22433	285.31	8172000000	53	202	8.5
1299	5.513	327041	Q1	O43583;F8VVL1	O43583;F8VVL1	Density-regulated protein	DENR	5.51617	5.49733	5.5249	2.72184	2.6876	2.72485	9.33074	9.3119	9.33947					13	13	13	65.7	22092	262.16	7192900000	48	198	8.5
1300	5.513	326670	Q1	P26358;P26358-2;P26358-3;K7ENW7;K7EJL0;K7EMU8;K7EIZ6;K7EP77	P26358;P26358-2;P26358-3	DNA (cytosine-5)-methyltransferase 1	DNMT1	5.52995	5.4764	5.53123	2.73562	2.66667	2.73118	10.2959	10.2424	10.2972					115	115	105	63.2	183160	323.31	76345000000	718	1616	76
1301	5.512	326574	Q1	Q9NQW7-3;Q9NQW7-4;Q9NQW7;Q9NQW7-2;Q5T6H7;Q5T6H2;Q5T6H3	Q9NQW7-3;Q9NQW7-4;Q9NQW7;Q9NQW7-2;Q5T6H7	Xaa-Pro aminopeptidase 1	XPNPEP1	5.53409	5.4793	5.52331	2.73975	2.66957	2.72327	9.93775	9.88297	9.92698					40	40	39	74.5	74797	323.31	31133000000	240	666	33
1302	5.512	326338	Q1	Q9H0P0-1;Q9H0P0-2;B9A035	Q9H0P0-1;Q9H0P0-2;B9A035	Cytosolic 5-nucleotidase 3A	NT5C3A	5.49059	5.55557	5.48846	2.69625	2.74584	2.68841	9.67677	9.74175	9.67464					23	23	3	6.1	33915	217.02	19373000000	186	297	20
1303	5.51	326039	Q1	Q00059;Q00059-2;H7BYN3	Q00059;Q00059-2;H7BYN3	Transcription factor A, mitochondrial	TFAM	5.51453	5.54066	5.47573	2.7202	2.73092	2.67569	9.57578	9.6019	9.53697					21	21	21	48.4	29096	188.75	14300000000	110	246	15
1304	5.51	325801	Q1	Q96A49	Q96A49	Synapse-associated protein 1	SYAP1	5.4778	5.51483	5.53801	2.68347	2.70509	2.73797	9.44214	9.47916	9.50235					25	25	25	71.9	39933	323.31	11770000000	127	352	12
1305	5.509	325741	Q1	Q9Y3Z3;Q9Y3Z3-4;Q9Y3Z3-3	Q9Y3Z3;Q9Y3Z3-4;Q9Y3Z3-3	Deoxynucleoside triphosphate triphosphohydrolase SAMHD1	SAMHD1	5.52204	5.5057	5.49972	2.72771	2.69597	2.69967	9.9257	9.90937	9.90338					42	42	42	72.8	72200	323.31	33704000000	252	626	33
1306	5.509	325592	Q1	J3KQ48;Q9Y3E5	J3KQ48;Q9Y3E5	Peptidyl-tRNA hydrolase 2, mitochondrial	PTRH2	5.50552	5.49129	5.53064	2.71119	2.68156	2.73059	9.29376	9.27953	9.31888					7	7	7	56.1	19325	322.16	7818700000	59	180	8
1307	5.509	325245	Q1	Q9NWV4	Q9NWV4	UPF0587 protein C1orf123	C1orf123	5.53395	5.44936	5.54381	2.73961	2.63963	2.74376	9.4191	9.33451	9.42896					11	11	11	81.9	18048	275.02	8912900000	55	160	10
1308	5.509	325033	Q1	Q14331;E9PLY7;E9PRR7;J3KSQ7;E9PI42	Q14331;E9PLY7	Protein FRG1	FRG1	5.51761	5.43956	5.56969	2.72328	2.62983	2.76965	9.40276	9.32471	9.45484					17	17	17	54.3	29172	115.02	9307900000	89	258	10
1309	5.508	324431	Q1	Q9NY33;G3V1D3;G3V180;Q9NY33-4;Q9NY33-2;E9PQ14;E9PPK9;E9PKK8;E9PNX5;E9PQF2	Q9NY33;G3V1D3;G3V180;Q9NY33-4	Dipeptidyl peptidase 3	DPP3	5.51016	5.53574	5.47713	2.71583	2.726	2.67708	9.9576	9.98318	9.92457					45	45	45	76.3	82588	323.31	36300000000	267	737	36.5
1310	5.507	324385	Q1	Q969G6;H7C4G0	Q969G6	Riboflavin kinase	RFK	5.54582	5.60607	5.37023	2.75149	2.79634	2.57018	9.27607	9.33632	9.10047					11	11	11	83.9	17623	166.52	6542700000	67	155	7
1311	5.506	324278	Q1	O60678;A0A0A0MSN7;O60678-2	O60678;A0A0A0MSN7;O60678-2	Protein arginine N-methyltransferase 3	PRMT3	5.5141	5.48278	5.52236	2.71977	2.67304	2.72232	9.65452	9.6232	9.66279					29	29	29	56.5	59875	272.78	16684000000	161	531	18
1312	5.506	323188	Q1	Q06203;D6RCC8;D6RE15	Q06203	Amidophosphoribosyltransferase	PPAT	5.40617	5.54839	5.56445	2.61183	2.73866	2.76441	9.68926	9.83148	9.84754					36	36	36	75.2	57398	323.31	24474000000	191	517	25
1313	5.506	323041	Q1	P12532;P12532-2;F8WCN3;C9JSQ1;C9JT96;C9J6W7;C9J995;C9J8F6;C9JJX8;P17540	P12532;P12532-2;F8WCN3	Creatine kinase U-type, mitochondrial	CKMT1A;CKMT1B	5.45213	5.53017	5.5363	2.6578	2.72044	2.73626	9.63831	9.71635	9.72249					25	25	25	65.2	47036	323.31	20537000000	180	417	20
1314	5.506	322491	Q1	O43709;O43709-3;H7C0G4;F8WD87;F8WD67;E9PCQ7;O43709-2;H7C170;F8VZ18;B3KR83;F2Z3D9	O43709;O43709-3	Probable 18S rRNA (guanine-N(7))-methyltransferase	WBSCR22	5.50289	5.50895	5.50622	2.70856	2.69922	2.70617	9.44874	9.4548	9.45206					14	14	14	47	31880	172.9	10128000000	74	281	11.5
1315	5.506	322355	Q1	Q14696;H0YLI4;Q14696-2	Q14696	LDLR chaperone MESD	MESDC2	5.52485	5.55238	5.43995	2.73052	2.74265	2.63991	9.41	9.43753	9.32511					16	16	16	60.7	26076	179.54	10098000000	70	234	10
1316	5.505	322335	Q1	Q14980;Q14980-4;Q14980-3;Q14980-5;F5H4J1;F5H6Y5;F5H763;F5H0Z7;F5H2F3;F5H3L6;F5GZW1;F5H1L0;F8W6T3;F5GWK2;F5H073;F5H068;F5H7R5;F5H4Y4;F5GWA2	Q14980;Q14980-4;Q14980-3	Nuclear mitotic apparatus protein 1	NUMA1	5.4819	5.51085	5.52285	2.68757	2.70112	2.7228	10.3538	10.3828	10.3948					159	159	2	0.8	238260	323.31	91767000000	836	2115	97
1317	5.505	322001	Q1	P10644;P10644-2;K7EPB2;K7EM13;K7EMZ6;K7EIE5;K7EID3;K7EJ40;K7EK41;K7EMU2;K7EQK3;X6RAV4;K7EPR5	P10644;P10644-2;K7EPB2	cAMP-dependent protein kinase type I-alpha regulatory subunit;cAMP-dependent protein kinase type I-alpha regulatory subunit, N-terminally processed	PRKAR1A	5.49878	5.49856	5.51768	2.70444	2.68883	2.71763	9.58805	9.58783	9.60695					25	25	20	54.6	42981	212.33	16274000000	171	381	16
1318	5.505	321177	Q1	P23511-2;P23511	P23511-2;P23511	Nuclear transcription factor Y subunit alpha	NFYA	5.49675	5.4797	5.53715	2.70242	2.66997	2.73711	8.68293	8.66588	8.72333					5	5	5	16.7	33939	119.58	2206400000	36	318	2
1319	5.503	320645	Q1	O00743;O00743-3;O00743-2;Q5T1S7	O00743;O00743-3;O00743-2	Serine/threonine-protein phosphatase 6 catalytic subunit;Serine/threonine-protein phosphatase 6 catalytic subunit, N-terminally processed	PPP6C	5.45642	5.57146	5.48057	2.66209	2.76173	2.68053	9.54569	9.66073	9.56984					17	17	17	68.9	35144	151.81	15556000000	124	305	16
1320	5.502	320406	Q1	Q6FI81;Q6FI81-3;H3BV90;H3BT65;H3BUG4;H3BPG7;H3BQ23;Q6FI81-2;H3BTZ8;H3BTT4	Q6FI81;Q6FI81-3;H3BV90;H3BT65;H3BUG4	Anamorsin	CIAPIN1	5.50854	5.5217	5.47703	2.71421	2.71197	2.67698	9.59782	9.61097	9.5663					23	23	23	83	33582	323.31	15470000000	151	312	16
1321	5.502	320285	Q1	Q9NRG0;H0YBP8;E5RGS9	Q9NRG0;H0YBP8	Chromatin accessibility complex protein 1	CHRAC1	5.42863	5.47126	5.60551	2.6343	2.66153	2.80546	9.01275	9.05538	9.18963					7	7	7	52.7	14710	159.69	4159000000	57	131	5
1322	5.501	320043	Q1	P49756;P49756-2;P49756-3;E9PQU5;H0YE46;E9PSE8;P49756-4	P49756	RNA-binding protein 25	RBM25	5.47129	5.49834	5.53439	2.67696	2.68861	2.73434	9.87496	9.90201	9.93805					45	45	45	49.9	100180	323.31	35687000000	263	843	33
1323	5.501	319963	Q1	O75431;O75431-2;C9JAZ1;C9JNK6;F8WE26	O75431;O75431-2;C9JAZ1;C9JNK6	Metaxin-2	MTX2	5.47366	5.50921	5.51866	2.67933	2.69948	2.71861	9.35881	9.39436	9.40381					15	15	15	73	29763	323.31	9185100000	98	263	10
1324	5.5	319620	Q1	P53992;G5EA31;P53992-2;A0A0U1RR49	P53992;G5EA31	Protein transport protein Sec24C	SEC24C	5.49831	5.49683	5.50498	2.70398	2.6871	2.70494	9.97453	9.97305	9.9812					52	52	49	58.6	118320	323.31	39154000000	309	1094	39
1325	5.5	318291	Q1	Q9UNP9;Q9UNP9-2;Q9UNP9-3;E9PEQ6;E9PK21	Q9UNP9;Q9UNP9-2;Q9UNP9-3;E9PEQ6	Peptidyl-prolyl cis-trans isomerase E;Peptidyl-prolyl cis-trans isomerase	PPIE	5.41767	5.49954	5.58132	2.62334	2.6898	2.78128	9.47891	9.56078	9.64256					16	16	4	24.3	33430	255.2	14726000000	96	301	15
1326	5.497	317792	Q1	Q9BZE4;Q9BZE4-2;Q9BZE4-3;Q5T3R7	Q9BZE4;Q9BZE4-2;Q9BZE4-3	Nucleolar GTP-binding protein 1	GTPBP4	5.54132	5.47833	5.47117	2.74698	2.6686	2.67113	9.88886	9.82588	9.81872					44	44	44	66.2	73964	323.31	27234000000	234	634	29
1327	5.497	317770	Q1	Q9Y2Q5;Q9Y2Q5-2;Q9Y2Q5-3	Q9Y2Q5;Q9Y2Q5-2;Q9Y2Q5-3	Ragulator complex protein LAMTOR2	LAMTOR2	5.46911	5.4708	5.55012	2.67478	2.66107	2.75007	9.05323	9.05492	9.13424					8	8	8	90.4	13507	176.9	4926100000	44	125	5
1328	5.496	316912	Q1	A0A087WVR3;A0A087WTW0;Q96T88;Q96T88-2;A0A087WWG9	A0A087WVR3;A0A087WTW0;Q96T88;Q96T88-2;A0A087WWG9	E3 ubiquitin-protein ligase UHRF1	UHRF1	5.48177	5.51473	5.49022	2.68744	2.705	2.69017	9.9797	10.0127	9.98815					51	51	50	72.1	91099	323.31	40354000000	364	806	41
1329	5.495	316870	Q1	Q53FT3;A0A087WYW7;E9PPG8;E9PJB2	Q53FT3;A0A087WYW7;E9PPG8	Protein Hikeshi	C11orf73	5.49493	5.48749	5.50381	2.7006	2.67776	2.70376	8.98214	8.97471	8.99102					9	9	9	66.5	21627	68.971	4438900000	49	197	4
1330	5.495	316270	Q1	Q8TEM1;Q8TEM1-2	Q8TEM1	Nuclear pore membrane glycoprotein 210	NUP210	5.43993	5.53967	5.50432	2.6456	2.72993	2.70427	10.2116	10.3113	10.276					68	68	68	48.3	205110	323.31	74464000000	459	1887	77
1331	5.494	315882	Q1	Q5BKZ1;A0A0A0MRN4;Q5BKZ1-3;Q5BKZ1-2;E2QRN4	Q5BKZ1;A0A0A0MRN4;Q5BKZ1-3	DBIRD complex subunit ZNF326	ZNF326	5.47646	5.47438	5.53264	2.68212	2.66464	2.73259	9.70403	9.70195	9.76021					26	26	26	56.9	65653	323.31	24226000000	185	582	22
1332	5.494	315031	Q1	O95478;A0A0A0MQZ6;H0YAI9	O95478;A0A0A0MQZ6	Ribosome biogenesis protein NSA2 homolog	NSA2	5.54199	5.44039	5.50077	2.74766	2.63066	2.70073	9.38139	9.27978	9.34017					18	18	18	54.6	30065	133.07	7806500000	81	260	9
1333	5.494	314930	Q1	E2QRF9;O75496;H7C608;C9K0U5	E2QRF9;O75496;H7C608	Geminin	GMNN	5.51897	5.45645	5.50586	2.72464	2.64672	2.70581	9.24922	9.1867	9.23611					8	8	8	53.6	20539	173.86	6435800000	56	179	7
1334	5.493	314848	Q1	Q92530;Q5QPM7;Q5QPM9;H0Y555;F5H4Z3	Q92530;Q5QPM7;Q5QPM9	Proteasome inhibitor PI31 subunit	PSMF1	5.44449	5.5246	5.5114	2.65015	2.71487	2.71135	9.37103	9.45114	9.43794					12	12	12	63.8	29816	182.68	10433000000	96	271	11
1335	5.492	314141	Q1	A0A0B4J2D5;P30042;H7C1F6;A0A0B4J2H4;P30042-2;F2Z2Q0;A0A096LP12	A0A0B4J2D5;P30042;H7C1F6;A0A0B4J2H4;P30042-2	ES1 protein homolog, mitochondrial	C21orf33	5.42842	5.57875	5.47004	2.63408	2.76902	2.67	9.45969	9.61003	9.50132					14	14	1	10.4	28142	278.86	13798000000	102	268	14
1336	5.492	313746	Q1	P40306;J3QQN1;J3QL48	P40306	Proteasome subunit beta type-10	PSMB10	5.48319	5.51159	5.48054	2.68886	2.70186	2.6805	9.36834	9.39674	9.36569					13	13	13	63	28936	275.6	9730300000	129	273	10
1337	5.492	313597	Q1	Q9UKF6;G5E9W3;C9JZH6	Q9UKF6;G5E9W3	Cleavage and polyadenylation specificity factor subunit 3	CPSF3	5.47196	5.51363	5.48969	2.67763	2.7039	2.68965	9.88215	9.92382	9.89989					41	41	41	71.9	77485	323.31	31988000000	301	684	33.5
1338	5.491	313185	Q1	H0Y9X1;Q96EY4;D6RA57;D6RE67;D6RC31	H0Y9X1;Q96EY4;D6RA57	Translation machinery-associated protein 16	TMA16	5.49367	5.46073	5.52001	2.69934	2.65099	2.71996	9.33306	9.30012	9.3594					19	19	19	51.7	27571	186.93	7559000000	77	242	9
1339	5.491	312940	Q1	Q6P2Q9;I3L0J9;I3L3Z8;I3L1T8	Q6P2Q9	Pre-mRNA-processing-splicing factor 8	PRPF8	5.45486	5.52186	5.49752	2.66052	2.71213	2.69747	10.4438	10.5108	10.4865					156	156	156	69	273600	323.31	122540000000	1050	2335	127
1340	5.489	312853	Q1	Q9NY12-2;Q9NY12	Q9NY12-2;Q9NY12	H/ACA ribonucleoprotein complex subunit 1	GAR1	5.5242	5.50232	5.4407	2.72987	2.69259	2.64066	9.45074	9.42886	9.36724					10	10	10	37.7	20834	108.71	9734700000	59	199	11
1341	5.489	312525	Q1	Q96HS1;Q96HS1-2;F5GXG4	Q96HS1;Q96HS1-2	Serine/threonine-protein phosphatase PGAM5, mitochondrial	PGAM5	5.4525	5.53003	5.48403	2.65816	2.7203	2.68398	9.6164	9.69394	9.64793					26	26	26	78.9	32004	188.92	18880000000	138	289	19
1342	5.489	312311	Q1	O76021;J3QSV6;I3L3U9;I3L3C4;O76021-2;I3L234;J3KPU7;I3L2F2;I3L4T8;I3L1Y4;I3L1A3	O76021;J3QSV6;I3L3U9	Ribosomal L1 domain-containing protein 1	RSL1D1	5.62151	5.35559	5.48894	2.82718	2.54586	2.68889	9.84909	9.58316	9.71651					28	28	28	47.1	54972	296.41	22019000000	187	490	22
1343	5.488	311957	Q1	Q9UNH7;A0A0A0MRI2;Q9UNH7-2;G3V5X9;H0YJF8;G3V4Z5;Q86XE0-2;Q86XE0;G3V2U1;G3V5U2	Q9UNH7;A0A0A0MRI2;Q9UNH7-2;G3V5X9	Sorting nexin-6;Sorting nexin-6, N-terminally processed	SNX6	5.45831	5.5268	5.47752	2.66398	2.71706	2.67748	9.6335	9.70198	9.65271					31	31	30	63.1	46648	323.31	18981000000	157	406	19.5
1344	5.487	311622	Q1	Q96EY1-2;Q96EY1-3	Q96EY1-2;Q96EY1-3	DnaJ homolog subfamily A member 3, mitochondrial	DNAJA3	5.47759	5.53723	5.44672	2.68326	2.7275	2.64668	9.60578	9.66542	9.57491					18	18	1	6.4	49611	214.5	14805000000	128	453	17.5
1345	5.487	310662	Q1	P12074	P12074	Cytochrome c oxidase subunit 6A1, mitochondrial	COX6A1	5.46861	5.52085	5.47113	2.67427	2.71112	2.67108	9.13191	9.18415	9.13443					4	3	3	28.4	12155	38.326	4199700000	15	109	6
1346	5.486	310558	Q1	Q969U7-2;Q969U7;K7ENR6;V9GZ55;K7ER45	Q969U7-2;Q969U7;K7ENR6;V9GZ55	Proteasome assembly chaperone 2	PSMG2	5.538	5.54892	5.37253	2.74367	2.73918	2.57248	9.44434	9.45526	9.27887					11	11	11	42.1	26321	61.423	9956800000	56	233	10.5
1347	5.486	310525	Q1	F5GWH5;P61165	F5GWH5;P61165	Transmembrane protein 258	TMEM258	5.32849	5.59993	5.53086	2.53416	2.7902	2.73081	8.38973	8.66117	8.5921					1	1	1	16.3	5706.5	2.3125	1753100000	23	49	1.5
1348	5.486	310459	Q1	Q9HAV0;C9JD14;H7C5J5	Q9HAV0	Guanine nucleotide-binding protein subunit beta-4	GNB4	5.49563	5.52623	5.43688	2.7013	2.7165	2.63683	9.52691	9.55751	9.46815					22	13	12	55.3	37567	323.31	13318000000	99	340	14
1349	5.485	309379	Q1	Q53GG5-2;A0A0A0MQY0;Q53GG5-3;Q53GG5;A0A087WYF8;D6RAF1	Q53GG5-2;A0A0A0MQY0;Q53GG5-3;Q53GG5	PDZ and LIM domain protein 3	PDLIM3	5.43321	5.51193	5.51133	2.63887	2.7022	2.71128	9.49445	9.57317	9.57257					23	23	23	86.7	34279	323.31	14531000000	174	316	15
1350	5.485	309048	Q1	Q8IWX8;J3QK89	Q8IWX8;J3QK89	Calcium homeostasis endoplasmic reticulum protein	CHERP	5.46041	5.46997	5.526	2.66608	2.66023	2.72596	9.87061	9.88016	9.9362					31	31	31	39.1	103700	323.31	32705000000	248	916	33.5
1351	5.485	308193	Q1	Q15424;Q15424-4;Q15424-3;Q15424-2;K7EII0;K7ES42	Q15424;Q15424-4;Q15424-3;Q15424-2	Scaffold attachment factor B1	SAFB	5.46587	5.46208	5.5282	2.67154	2.65234	2.72816	9.87607	9.87227	9.9384					74	51	51	41.3	102640	323.31	33426000000	307	915	33.5
1352	5.485	307973	Q1	Q9Y3B8-3	Q9Y3B8-3	Oligoribonuclease, mitochondrial	REXO2	5.48634	5.48942	5.47967	2.692	2.67968	2.67963	9.41288	9.41596	9.40622					13	13	1	4.4	23754	159.02	10268000000	75	205	11
1353	5.485	307475	Q1	Q9Y3C6	Q9Y3C6	Peptidyl-prolyl cis-trans isomerase-like 1	PPIL1	5.49882	5.49318	5.46218	2.70449	2.68345	2.66213	9.28706	9.28142	9.25042					6	6	6	56	18237	95.372	9240000000	54	166	8
1354	5.484	307282	Q1	Q06210-2;Q06210;O94808;E5RJP4	Q06210-2;Q06210	Glutamine--fructose-6-phosphate aminotransferase [isomerizing] 1	GFPT1	5.42783	5.5074	5.51783	2.63349	2.69767	2.71778	9.94137	10.0209	10.0314					47	47	47	74.9	76758	323.31	42407000000	331	681	42.5
1355	5.484	306923	Q1	Q9Y3D0;J3KS95;H3BNV7;J3QLT9	Q9Y3D0	Mitotic spindle-associated MMXD complex subunit MIP18	FAM96B	5.35139	5.57079	5.5303	2.55705	2.76105	2.73025	9.01469	9.23409	9.1936					12	12	12	90.8	17663	269.91	6305600000	72	163	6
1356	5.484	306521	Q1	Q92734-2;Q92734;Q92734-4;Q92734-3;C9JJP5;C9JUE0;C9JTY3	Q92734-2;Q92734;Q92734-4;Q92734-3;C9JJP5;C9JUE0;C9JTY3	Protein TFG	TFG	5.45707	5.53263	5.46199	2.66274	2.72289	2.66194	9.42141	9.49696	9.42632					13	13	13	45.7	43020	323.31	13123000000	87	396	12
1357	5.484	306505	Q1	Q8N335;C9JFA7;C9JM46;C9K0P5;P21695-2;P21695	Q8N335;C9JFA7;C9JM46	Glycerol-3-phosphate dehydrogenase 1-like protein;Glycerol-3-phosphate dehydrogenase [NAD(+)]	GPD1L	5.45346	5.48266	5.51484	2.65913	2.67293	2.7148	9.45255	9.48176	9.51394					25	25	25	80.3	38418	216.86	12147000000	133	351	13
1358	5.482	306318	Q1	Q16186;A0A087WX59;A0A087WUX6	Q16186	Proteasomal ubiquitin receptor ADRM1	ADRM1	5.45638	5.55049	5.44048	2.66204	2.74076	2.64043	9.38292	9.47704	9.36702					11	11	11	31.2	42153	89.224	9791600000	73	407	11
1359	5.482	305697	Q1	Q9Y316;Q9Y316-3;Q9Y316-2;B5MCI6	Q9Y316;Q9Y316-3;Q9Y316-2	Protein MEMO1	MEMO1	5.48287	5.48358	5.47939	2.68854	2.67385	2.67934	9.57214	9.57285	9.56866					22	22	22	86.9	33733	323.31	15991000000	165	297	16
1360	5.482	305662	Q1	P55957;P55957-2;P55957-4;B2ZP78;P55957-3	P55957;P55957-2;P55957-4	BH3-interacting domain death agonist;BH3-interacting domain death agonist p15;BH3-interacting domain death agonist p13;BH3-interacting domain death agonist p11	BID	5.47421	5.44341	5.52766	2.67988	2.63368	2.72762	9.35936	9.32856	9.41281					16	16	16	72.3	21994	304.32	9464000000	97	195	10
1361	5.482	305649	Q1	P43034;I3L3N5;P43034-2;I3L495	P43034	Platelet-activating factor acetylhydrolase IB subunit alpha	PAFAH1B1	5.44728	5.4727	5.52483	2.65295	2.66297	2.72478	9.69416	9.71958	9.77171					36	36	36	77.6	46637	323.31	21110000000	205	410	23
1362	5.482	305605	Q1	O43676;C9JKQ2	O43676;C9JKQ2	NADH dehydrogenase [ubiquinone] 1 beta subcomplex subunit 3	NDUFB3	5.44078	5.5573	5.44648	2.64644	2.74756	2.64643	9.0249	9.14142	9.0306					8	8	8	53.1	11402	21.367	4649300000	36	98	5
1363	5.481	305599	Q1	P42285;H0YAC4;H0Y8U3;D6REC7	P42285	Superkiller viralicidic activity 2-like 2	SKIV2L2	5.49425	5.48005	5.46843	2.69992	2.67031	2.66838	10.1428	10.1286	10.117					65	65	65	59.2	117800	323.31	51799000000	427	1042	58
1364	5.48	305509	Q1	O95168;C9JXQ9;O95168-2;F2Z3P9	O95168;C9JXQ9;O95168-2;F2Z3P9	NADH dehydrogenase [ubiquinone] 1 beta subcomplex subunit 4	NDUFB4	5.4733	5.48254	5.48325	2.67897	2.6728	2.68321	8.96051	8.96975	8.97046					9	9	9	59.7	15208	31.824	3493100000	39	129	4
1365	5.48	305435	Q1	Q9NPD8	Q9NPD8	Ubiquitin-conjugating enzyme E2 T	UBE2T	5.50479	5.48129	5.45275	2.71046	2.67156	2.6527	9.38995	9.36644	9.3379					13	13	13	62.4	22521	189.97	9257700000	74	197	10
1366	5.479	305056	Q1	P36957;P36957-2;Q86SW4;H0YJF9;G3V3F0;G3V5M3	P36957;P36957-2	Dihydrolipoyllysine-residue succinyltransferase component of 2-oxoglutarate dehydrogenase complex, mitochondrial	DLST	5.46891	5.52902	5.44048	2.67458	2.71929	2.64044	9.66582	9.72593	9.63739					21	21	21	46.6	48755	234.68	18824000000	112	453	20.5
1367	5.479	304206	Q1	C9JIF9;P13798;H7C393;H7C1U0;C9JLK2;F8WEH5;H0YFE5	C9JIF9;P13798	Acylamino-acid-releasing enzyme	APEH	5.53729	5.48189	5.41784	2.74295	2.67216	2.6178	9.89956	9.84416	9.78012					33	33	33	56.7	81673	323.31	26024000000	206	737	30
1368	5.479	303957	Q1	Q9Y6H1;Q5T1J5	Q9Y6H1;Q5T1J5	Coiled-coil-helix-coiled-coil-helix domain-containing protein 2;Putative coiled-coil-helix-coiled-coil-helix domain-containing protein CHCHD2P9, mitochondrial	CHCHD2;CHCHD2P9	5.40631	5.47639	5.55317	2.61198	2.66666	2.75312	8.99043	9.06051	9.13729					4	4	4	39.1	15512	13.83	4349100000	8	151	5
1369	5.478	303924	Q1	Q92888-4	Q92888-4			5.46295	5.48764	5.48446	2.66861	2.67791	2.68441	10.0202	10.0449	10.0417					56	56	1	1.1	105850	323.31	43539000000	347	948	47
1370	5.478	303718	Q1	P07948;E5RJ37	P07948	Tyrosine-protein kinase Lyn	LYN	5.48073	5.44881	5.50431	2.68639	2.63908	2.70426	9.79724	9.76533	9.82083				+	42	42	2	5.1	58573	323.31	27734000000	215	512	27
1371	5.477	303354	Q1	A0A087WW40;Q9Y371;Q9Y371-2;Q9Y371-3	A0A087WW40;Q9Y371;Q9Y371-2;Q9Y371-3	Endophilin-B1	SH3GLB1	5.48554	5.43892	5.50756	2.6912	2.62919	2.70751	9.56102	9.5144	9.58304					20	19	19	49.5	44260	323.31	15280000000	103	394	15.5
1372	5.477	303204	Q1	K7EMC9;Q969T9;B4DFG2;A6NG10;K7ENL2;K7EIJ0;K7EIN1;K7ESN4;K7EIK1	K7EMC9;Q969T9;B4DFG2;A6NG10;K7ENL2;K7EIJ0	WW domain-binding protein 2	WBP2	5.4634	5.5302	5.43657	2.66907	2.72047	2.63652	9.19365	9.26045	9.16681					12	12	12	59.1	27550	76.015	8372500000	98	257	7
1373	5.476	302732	Q1	Q08752;H0Y8J0	Q08752	Peptidyl-prolyl cis-trans isomerase D	PPID	5.44427	5.50653	5.47828	2.64994	2.6968	2.67823	9.72736	9.78962	9.76137					32	32	32	80.5	40763	290.83	21820000000	182	370	25
1374	5.475	302717	Q1	O00273;K7ERT1	O00273	DNA fragmentation factor subunit alpha	DFFA	5.47031	5.42156	5.53214	2.67598	2.61183	2.73209	9.61074	9.56198	9.67256					26	26	9	23	36521	323.31	16538000000	130	331	18
1375	5.475	302087	Q1	P57088;D6RAA6;H0Y8N0;J3KN43;D6RBY2	P57088;D6RAA6	Transmembrane protein 33	TMEM33	5.44924	5.50343	5.47103	2.65491	2.6937	2.67098	9.33439	9.38858	9.35618					11	11	11	42.1	27978	48.667	8756000000	33	247	10
1376	5.474	301801	Q1	A0AVT1;A0AVT1-2;A0AVT1-3;A0AVT1-4;H0Y8S8;H0Y9U5	A0AVT1;A0AVT1-2	Ubiquitin-like modifier-activating enzyme 6	UBA6	5.44891	5.47679	5.49582	2.65458	2.66705	2.69578	9.98727	10.0152	10.0342					68	68	68	78.2	117970	323.31	39637000000	455	1052	45
1377	5.474	300984	Q1	H7C2Q8;Q99848	H7C2Q8;Q99848	Probable rRNA-processing protein EBP2	EBNA1BP2	5.49451	5.45462	5.47181	2.70018	2.64488	2.67176	9.61011	9.57022	9.58741					26	26	26	45.4	40684	323.31	15311000000	156	361	17
1378	5.473	300977	Q1	Q9NRR3;D6REL0	Q9NRR3;D6REL0	CDC42 small effector protein 2	CDC42SE2	5.583	5.58315	5.25288	2.78867	2.77341	2.45283	8.64424	8.64439	8.31412					2	2	2	66.7	9223.4	92.002	1899000000	20	84	1.5
1379	5.473	300946	Q1	Q04864-2;Q04864	Q04864-2;Q04864	Proto-oncogene c-Rel	REL	5.46727	5.4831	5.46821	2.67293	2.67336	2.66816	9.71415	9.72997	9.71508					28	27	27	51.8	65224	319.31	21034000000	146	587	23
1380	5.473	300796	Q1	P48449;P48449-3;P48449-2;A0A0G2JQD0;C9J315;H7C3A5;A0A0G2JS81	P48449;P48449-3;P48449-2;A0A0G2JQD0	Lanosterol synthase	LSS	5.43441	5.53252	5.4514	2.64008	2.72278	2.65136	9.85738	9.95548	9.87437					46	46	46	67.9	83308	323.31	30509000000	233	732	34.5
1381	5.473	300160	Q1	O95197-3;B7Z4M1;O95197-6;O95197-5	O95197-3;B7Z4M1;O95197-6;O95197-5	Reticulon-3;Reticulon	RTN3	5.40481	5.55866	5.45414	2.61048	2.74893	2.65409	9.06811	9.22196	9.11744					3	3	1	6.4	25609	65.954	4948200000	19	236	6
1382	5.472	299990	Q1	Q8TBC4;Q8TBC4-2;F8W8D4;F8WF86	Q8TBC4;Q8TBC4-2;F8W8D4	NEDD8-activating enzyme E1 catalytic subunit	UBA3	5.45501	5.49923	5.46272	2.66067	2.6895	2.66267	9.64119	9.68541	9.6489					24	24	24	70.6	51852	323.31	17738000000	129	463	20
1383	5.472	299941	Q1	O76094;O76094-2;R4GNC1;D6RDY6	O76094;O76094-2	Signal recognition particle subunit SRP72	SRP72	5.4645	5.45423	5.49779	2.67016	2.64449	2.69775	9.8548	9.84453	9.88809					37	37	37	68.4	74605	323.31	28264000000	204	671	32
1384	5.472	298635	Q1	Q9Y5A9;Q9Y5A9-2;S4R3V3;S4R3J8	Q9Y5A9;Q9Y5A9-2	YTH domain-containing family protein 2	YTHDF2	5.44883	5.59842	5.36813	2.65449	2.78869	2.56809	9.60115	9.75074	9.52046					25	25	20	40.2	62333	323.31	17488000000	151	579	18.5
1385	5.472	298488	Q1	P46087;P46087-4;P46087-2;P46087-3;F5GWB7;F5H709;F5H5X6;F5GYR3;F5H359;F5H8G6	P46087;P46087-4;P46087-2;P46087-3	Probable 28S rRNA (cytosine(4447)-C(5))-methyltransferase	NOP2	5.44883	5.45566	5.51038	2.65449	2.64593	2.71033	9.83913	9.84596	9.90068					42	42	42	49.3	89301	323.31	28043000000	196	812	32
1386	5.472	298034	Q1	P63172;Q5VTU3	P63172;Q5VTU3	Dynein light chain Tctex-type 1	DYNLT1	5.47548	5.43969	5.49945	2.68114	2.62996	2.6994	9.10099	9.06521	9.12496					6	6	6	91.2	12452	191.83	5528200000	63	113	5.5
1387	5.471	297819	Q1	Q0VDF9;H7C2A1;B0YIZ1	Q0VDF9	Heat shock 70 kDa protein 14	HSPA14	5.45886	5.46882	5.48589	2.66453	2.65909	2.68584	9.77538	9.78534	9.8024					30	30	30	71.1	54794	323.31	24344000000	176	509	27
1388	5.471	297374	Q1	Q96IU4;F8W9U3;B4DQI4;Q96IU4-2	Q96IU4;F8W9U3;B4DQI4	Alpha/beta hydrolase domain-containing protein 14B	ABHD14B	5.50042	5.47251	5.44024	2.70609	2.66277	2.64019	9.42697	9.39905	9.36678					8	8	8	56.7	22345	148.61	10299000000	65	210	11
1389	5.47	297110	Q1	Q8WXC6	Q8WXC6	Myeloma-overexpressed gene 2 protein	MYEOV2	5.53205	5.63629	5.24153	2.73772	2.82655	2.44149	8.41721	8.52144	8.12668					3	3	3	100	6210.7	45.172	1387200000	90	57	1
1390	5.469	296995	Q1	P16455	P16455	Methylated-DNA--protein-cysteine methyltransferase	MGMT	5.42771	5.48132	5.49914	2.63338	2.67158	2.6991	9.2671	9.32071	9.33854					8	8	8	48.3	21646	83.457	8319100000	51	207	9
1391	5.468	296875	Q1	Q9P0J0;Q9P0J0-2	Q9P0J0;Q9P0J0-2	NADH dehydrogenase [ubiquinone] 1 alpha subcomplex subunit 13	NDUFA13	5.60419	5.49582	5.30456	2.80985	2.68609	2.50452	9.46706	9.3587	9.16744					11	11	3	27.1	16698	66.875	8017700000	56	144	9.5
1392	5.468	296830	Q1	Q9Y6M9;E9PH64;E7EWZ0;E9PF49	Q9Y6M9;E9PH64;E7EWZ0;E9PF49	NADH dehydrogenase [ubiquinone] 1 beta subcomplex subunit 9	NDUFB9	5.45379	5.40585	5.54483	2.65946	2.59612	2.74479	9.29318	9.24524	9.38423					11	11	11	69.8	21831	116.16	7371100000	65	179	9
1393	5.468	296640	Q1	P28331;P28331-2;P28331-4;P28331-5;B4DJ81;P28331-3;C9JPQ5;F8WDL5	P28331;P28331-2;P28331-4;P28331-5;B4DJ81;P28331-3	NADH-ubiquinone oxidoreductase 75 kDa subunit, mitochondrial	NDUFS1	5.45891	5.44684	5.49864	2.66457	2.63711	2.69859	9.92384	9.91178	9.96357					45	45	45	73	79467	323.31	32472000000	302	727	38
1394	5.468	296508	Q1	P49006	P49006	MARCKS-related protein	MARCKSL1	5.38727	5.45904	5.55681	2.59294	2.64931	2.75676	9.05057	9.12235	9.22011					7	7	7	73.8	19529	143.72	6048700000	42	195	6
1395	5.467	296313	Q1	Q9NZZ3;Q9NZZ3-2	Q9NZZ3;Q9NZZ3-2	Charged multivesicular body protein 5	CHMP5	5.32758	5.44675	5.62802	2.53324	2.63702	2.82798	8.99088	9.11005	9.29133					11	11	11	48.4	24570	259.04	5078000000	94	219	6
1396	5.467	296030	Q1	Q8NI22;Q8NI22-2;Q8NI22-3;H7BZ18	Q8NI22;Q8NI22-2;Q8NI22-3;H7BZ18	Multiple coagulation factor deficiency protein 2	MCFD2	5.74173	5.35467	5.30471	2.94739	2.54494	2.50466	9.43979	9.05273	9.00277					4	4	4	68.5	16390	170.29	5857300000	56	146	6.5
1397	5.467	295767	Q1	Q9Y5J1;J3KSR7;J3QR85;J3QRG0;J3QLD6;F6VJE8	Q9Y5J1	U3 small nucleolar RNA-associated protein 18 homolog	UTP18	5.42707	5.48772	5.48477	2.63274	2.67799	2.68473	9.74359	9.80424	9.80129					30	30	30	71.9	62003	323.31	22356000000	223	556	27
1398	5.466	295417	Q1	Q14683;G8JLG1;H0Y7K8;V9GY57;V9GYN9	Q14683;G8JLG1	Structural maintenance of chromosomes protein 1A;Structural maintenance of chromosomes protein	SMC1A	5.4705	5.46302	5.46499	2.67617	2.65328	2.66494	10.2069	10.1994	10.2014					103	103	103	73.5	143230	323.31	68415000000	591	1233	71
1399	5.466	294449	Q1	Q86WR0;Q86WR0-2;G3V121;B7Z2L8;Q0VGD4	Q86WR0;Q86WR0-2	Coiled-coil domain-containing protein 25	CCDC25	5.43548	5.48872	5.47346	2.64115	2.67899	2.67342	9.38133	9.43457	9.41931					19	19	19	63	24479	144.87	10578000000	99	208	11.5
1400	5.466	294237	Q1	Q9Y5K5-2;Q9Y5K5-4;Q9Y5K5-3;Q5LJA5;Q5LJB0;H0Y636;H0Y4K0	Q9Y5K5-2;Q9Y5K5-4;Q9Y5K5-3;Q5LJA5;Q5LJB0	Ubiquitin carboxyl-terminal hydrolase isozyme L5;Ubiquitin carboxyl-terminal hydrolase	UCHL5	5.49196	5.53445	5.37022	2.69763	2.72472	2.57017	9.63239	9.67487	9.51064					22	22	1	7.9	36079	323.31	16030000000	146	316	18
1401	5.465	293363	Q1	Q8N6M0;A0A087X0W9;Q8N6M0-2;A0A0C4DH76	Q8N6M0;A0A087X0W9;Q8N6M0-2	OTU domain-containing protein 6B	OTUD6B	5.50606	5.47086	5.41875	2.71173	2.66113	2.61871	9.53734	9.50214	9.45003					18	18	18	76.8	33812	323.31	12970000000	139	293	14
1402	5.465	292929	Q1	P09417;P09417-2;B7Z415;D6RGG7;H0Y8F7;D6RHJ7	P09417;P09417-2;B7Z415;D6RGG7	Dihydropteridine reductase	QDPR	5.54053	5.46206	5.39167	2.7462	2.65232	2.59162	9.46707	9.3886	9.31821					14	14	14	64.8	25789	228.06	10346000000	93	244	11
1403	5.464	292884	Q1	O00560;O00560-3;B4DHN5;E9PBU7	O00560;O00560-3;B4DHN5;E9PBU7	Syntenin-1	SDCBP	5.41809	5.44221	5.53159	2.62376	2.63248	2.73154	9.30324	9.32736	9.41674					15	15	2	12.4	32444	323.31	9334900000	75	298	10
1404	5.464	292726	Q1	Q05048;A0A0A0MSZ9;A3KFI9	Q05048;A0A0A0MSZ9	Cleavage stimulation factor subunit 1	CSTF1	5.46451	5.46621	5.461	2.67018	2.65648	2.66095	9.53999	9.54169	9.53648					19	19	19	55.7	48357	323.31	14161000000	99	431	15.5
1405	5.464	292536	Q1	Q9BUF5;K7ESM5;K7ES63;K7EK43;K7ESQ3;K7EQT3;K7EJ64;K7ERA8;K7EJZ4;K7EL29;K7EN98;K7EPE5	Q9BUF5;K7ESM5	Tubulin beta-6 chain	TUBB6	5.45552	5.48554	5.44954	2.66119	2.6758	2.64949	9.59595	9.62596	9.58996					20	5	5	16.4	49857	28.601	15711000000	29	446	18
1406	5.462	291482	Q1	Q9BVI4;F5H303	Q9BVI4	Nucleolar complex protein 4 homolog	NOC4L	5.44642	5.52037	5.41999	2.65209	2.71063	2.61995	9.80869	9.88264	9.78227					28	28	28	69.8	58467	323.31	27247000000	221	516	30
1407	5.462	291319	Q1	Q6NXE6;Q6NXE6-2;B4E1N1;F5H4P3;F5GWV0;H0YH65;F5H2K4;H0YGL0;F5H2X2;F5H052;F5H3X1;F5H6J3;F5GZP0;H0YGQ5;F5H7V0	Q6NXE6;Q6NXE6-2;B4E1N1;F5H4P3	Armadillo repeat-containing protein 6	ARMC6	5.44677	5.47147	5.46627	2.65244	2.66174	2.66622	9.6841	9.7088	9.7036					25	25	25	64.3	54141	323.31	21382000000	187	501	22.5
1408	5.461	291047	Q1	P51570;P51570-2;K7ERJ9;K7EII7;K7ERN9	P51570;P51570-2	Galactokinase	GALK1	5.43324	5.4575	5.49285	2.63891	2.64777	2.6928	9.59715	9.6214	9.65675					29	29	29	76.3	42272	323.31	16330000000	166	392	19
1409	5.461	291013	Q1	Q4G176;F5H5A1;F5H2G6;F5H755;F5H362;F5GX20;H0YGC7;F5H3B2;H0YH37;H0YGJ0	Q4G176;F5H5A1;F5H2G6	Acyl-CoA synthetase family member 3, mitochondrial	ACSF3	5.4154	5.47574	5.49038	2.62107	2.666	2.69034	9.60158	9.66192	9.67657					38	38	38	67	64129	266.93	19275000000	194	576	20
1410	5.461	290952	Q1	Q96RU3-5;Q96RU3-2;Q96RU3-3;Q96RU3;H0Y7W6	Q96RU3-5;Q96RU3-2;Q96RU3-3;Q96RU3;H0Y7W6	Formin-binding protein 1	FNBP1	5.43893	5.49221	5.45036	2.6446	2.68248	2.65031	9.77124	9.82452	9.78267					39	39	4	6.7	70751	323.31	23396000000	242	612	28
1411	5.46	289800	Q1	Q16822;B4DW73;H0YML5;P35558;P35558-2	Q16822;B4DW73;H0YML5	Phosphoenolpyruvate carboxykinase [GTP], mitochondrial	PCK2	5.41981	5.5398	5.42102	2.62548	2.73007	2.62098	9.78209	9.90207	9.7833					43	43	14	16.4	70729	323.31	29395000000	232	640	30
1412	5.459	289668	Q1	Q15427;Q5SZ64	Q15427;Q5SZ64	Splicing factor 3B subunit 4	SF3B4	5.55122	5.43928	5.3868	2.75688	2.62955	2.58676	9.53328	9.42134	9.36886					9	9	9	28.1	44385	209.35	12531000000	94	424	12.5
1413	5.459	289660	Q1	Q9UQ13;Q9UQ13-2;X6RI37	Q9UQ13;Q9UQ13-2;X6RI37	Leucine-rich repeat protein SHOC-2	SHOC2	5.52411	5.42332	5.42858	2.72977	2.61359	2.62853	9.73148	9.63069	9.63595					25	25	25	60.3	64887	308.8	17156000000	142	582	21
1414	5.458	289535	Q1	P52789;E9PB90	P52789;E9PB90	Hexokinase-2;Hexokinase	HK2	5.46871	5.46419	5.44173	2.67438	2.65446	2.64168	10.026	10.0214	9.99897					55	55	49	58.3	102380	323.31	42519000000	308	917	47
1415	5.458	289489	Q1	Q9Y2D5;Q9Y2D5-5;Q9Y2D5-6;Q9Y2D5-7;Q9Y2D5-4;C9JVY5	Q9Y2D5;Q9Y2D5-5;Q9Y2D5-6;Q9Y2D5-7;Q9Y2D5-4;C9JVY5	A-kinase anchor protein 2	AKAP2	5.43707	5.44285	5.49436	2.64274	2.63312	2.69431	9.94027	9.94605	9.99756					49	49	49	66	94659	323.31	35341000000	310	859	41.5
1416	5.457	289199	Q1	Q9Y5P6;Q9Y5P6-2	Q9Y5P6;Q9Y5P6-2	Mannose-1-phosphate guanyltransferase beta	GMPPB	5.45796	5.44798	5.4639	2.66362	2.63824	2.66385	9.61028	9.6003	9.61622					20	20	20	73.6	39834	323.01	16731000000	145	360	18.5
1417	5.456	289143	Q1	Q01658	Q01658	Protein Dr1	DR1	5.38159	5.43674	5.55008	2.58725	2.62701	2.75003	9.11183	9.16699	9.28033					10	10	10	54	19443	152.77	6113500000	65	176	7
1418	5.456	288824	Q1	J3QLS3;Q9Y2R9;J3QQS1;J3KSI8;J3QKW2	J3QLS3;Q9Y2R9;J3QQS1;J3KSI8;J3QKW2	28S ribosomal protein S7, mitochondrial	MRPS7	5.49804	5.46952	5.39959	2.70371	2.65978	2.59954	9.42459	9.39606	9.32613					14	14	14	49.1	31704	148.21	11750000000	73	271	11
1419	5.456	288287	Q1	Q9BQ67;M0QX71	Q9BQ67;M0QX71	Glutamate-rich WD repeat-containing protein 1	GRWD1	5.44475	5.47264	5.44953	2.65042	2.66291	2.64949	9.57294	9.60083	9.57772					16	16	16	50.7	49419	323.31	14437000000	109	446	17.5
1420	5.455	288191	Q1	P54725-2;P54725;K7ENJ0;K7ELW1;K7EQ16;K7ELU6	P54725-2;P54725;K7ENJ0;K7ELW1	UV excision repair protein RAD23 homolog A	RAD23A	5.41962	5.54177	5.40419	2.62529	2.73204	2.60415	9.30477	9.42692	9.28934					15	12	1	14	33433	97.957	8497800000	90	308	10
1421	5.455	287651	Q1	Q8N5K1;D6RCF4;I3L1N9	Q8N5K1;D6RCF4	CDGSH iron-sulfur domain-containing protein 2	CISD2	5.37745	5.49184	5.49567	2.58312	2.6821	2.69563	9.16569	9.28008	9.28391					5	5	5	40.7	15278	45.502	5777700000	43	135	8
1422	5.455	287322	Q1	Q9H8Y8;Q9H8Y8-3;Q9H8Y8-2	Q9H8Y8;Q9H8Y8-3;Q9H8Y8-2	Golgi reassembly-stacking protein 2	GORASP2	5.41386	5.51924	5.43136	2.61953	2.70951	2.63131	9.44514	9.55052	9.46264					16	16	16	36.5	47145	252.66	12793000000	108	452	14
1423	5.454	287303	Q1	P51659;P51659-3;E7EWE5;P51659-2;G5E9S2;E7ET17;E7ER27;E7EPL9	P51659;P51659-3;E7EWE5;P51659-2;G5E9S2;E7ET17;E7ER27;E7EPL9	Peroxisomal multifunctional enzyme type 2;(3R)-hydroxyacyl-CoA dehydrogenase;Enoyl-CoA hydratase 2	HSD17B4	5.44067	5.46023	5.46195	2.64634	2.6505	2.6619	9.88212	9.90168	9.9034					50	50	50	71.7	79685	323.31	32424000000	287	736	36
1424	5.454	286850	Q1	Q99614;H0YB37	Q99614	Tetratricopeptide repeat protein 1	TTC1	5.43023	5.49039	5.44093	2.6359	2.68065	2.64088	9.5195	9.57966	9.5302					19	19	18	64	33526	323.31	15369000000	110	292	16
1425	5.454	286629	Q1	Q92890;Q92890-1;Q92890-3;C9JNP9;C9IZG3;C9J6N9	Q92890;Q92890-1;Q92890-3	Ubiquitin fusion degradation protein 1 homolog	UFD1L	5.38396	5.47283	5.5046	2.58963	2.66309	2.70455	9.41524	9.5041	9.53588					19	19	19	66.8	34500	282.37	12435000000	132	307	14
1426	5.454	286365	Q1	Q9Y570;Q9Y570-4;Q9Y570-2;Q9Y570-3	Q9Y570;Q9Y570-4;Q9Y570-2	Protein phosphatase methylesterase 1	PPME1	5.39378	5.52399	5.44294	2.59945	2.71425	2.6429	9.50938	9.63959	9.55854					18	18	18	54.4	42315	217.83	15373000000	118	386	17
1427	5.453	286241	Q1	Q13952;Q13952-5;Q13952-3;Q5T6K7;E9PI99;Q13952-6;Q13952-7;Q13952-2;Q13952-4;A0A0A0MT00;E9PQR2;E9PJA8;E9PL11	Q13952;Q13952-5;Q13952-3;Q5T6K7;E9PI99;Q13952-6;Q13952-7;Q13952-2;Q13952-4;A0A0A0MT00	Nuclear transcription factor Y subunit gamma	NFYC	5.43532	5.42497	5.50007	2.64099	2.61523	2.70003	9.16557	9.15521	9.23032					14	14	2	8.3	50302	115.1	6212700000	55	458	7
1428	5.452	286194	Q1	O60684;Q5TFJ7;S4R3E5	O60684;Q5TFJ7	Importin subunit alpha-7	KPNA6	5.44411	5.40417	5.50831	2.64978	2.59444	2.70826	9.59643	9.5565	9.66063					27	27	16	39.7	60029	323.31	15214000000	141	536	18.5
1429	5.452	285637	Q1	Q13616;A0A0C4DGX4;Q8NI38-2	Q13616;A0A0C4DGX4	Cullin-1	CUL1	5.48394	5.46069	5.41174	2.68961	2.65096	2.6117	10.0223	9.99905	9.95011					57	57	57	65.1	89677	323.31	38888000000	329	776	45
1430	5.452	285468	Q1	J3KNL2;Q8WYJ6;Q8WYJ6-2;I3L2M1;J3QRU3;A0A087WWZ5;J3QLR2;J3QLA8;E7EQM7;O43236-6;E7EPG2;E7EX32;G3XAH0;Q99719-2;Q99719	J3KNL2;Q8WYJ6	Septin-1	2017-09-01	5.47904	5.47154	5.40431	2.6847	2.66181	2.60426	9.73526	9.72776	9.66052					31	31	28	63.5	46918	291.56	20142000000	164	414	23.5
1431	5.451	284935	Q1	Q9Y5J9;G3XAN8;E9PIR3	Q9Y5J9;G3XAN8	Mitochondrial import inner membrane translocase subunit Tim8 B	TIMM8B	5.46029	5.39992	5.49355	2.66596	2.59019	2.6935	9.12359	9.06322	9.15685					8	8	8	65.1	9343.5	204.01	6890200000	53	83	6
1432	5.451	284871	Q1	P29144	P29144	Tripeptidyl-peptidase 2	TPP2	5.4546	5.46099	5.43802	2.66027	2.65125	2.63797	10.1391	10.1455	10.1225					78	78	2	1.4	138350	323.31	51655000000	440	1249	63
1433	5.451	284700	Q1	Q9NTZ6;Q5JX62;A6PVI1;A6PVI0	Q9NTZ6	RNA-binding protein 12	RBM12	5.42525	5.48631	5.44167	2.63092	2.67658	2.64162	9.7728	9.83386	9.78921					32	32	32	39.6	97394	323.31	25589000000	186	932	29
1434	5.451	284663	Q1	K7ES61;Q9BYD3;X6RAY8;Q9BYD3-2;K7ELQ0;K7EKI4;K7ELF1;K7EJ73	K7ES61;Q9BYD3;X6RAY8;Q9BYD3-2;K7ELQ0;K7EKI4;K7ELF1	39S ribosomal protein L4, mitochondrial	MRPL4	5.51034	5.47979	5.36307	2.716	2.67006	2.56302	9.43688	9.40634	9.28961					17	17	17	63	33792	243.63	9994900000	94	300	11
1435	5.451	284295	Q1	B7Z6D5;Q96GQ7;A0A087X059;A0A087WYH5	B7Z6D5;Q96GQ7	Probable ATP-dependent RNA helicase DDX27	DDX27	5.43305	5.42469	5.49436	2.63872	2.61495	2.69431	9.89799	9.88962	9.95929					49	49	49	57.3	86604	323.31	32791000000	273	765	38
1436	5.45	283895	Q1	Q9ULX3;H3BUR4	Q9ULX3	RNA-binding protein NOB1	NOB1	5.43647	5.43223	5.482	2.64213	2.6225	2.68195	9.68334	9.67911	9.72887					20	20	20	56.8	46674	323.31	19035000000	122	412	23
1437	5.45	283768	Q1	P16220;P16220-3;P16220-2;C9J4L5;C9JBT4;H7C3I0;E7EWP8;C9J896;C9J276;H7C1R5	P16220;P16220-3;P16220-2;C9J4L5;C9JBT4;H7C3I0;E7EWP8;C9J896	Cyclic AMP-responsive element-binding protein 1	CREB1	5.51513	5.45887	5.37619	2.7208	2.64914	2.57615	8.87741	8.82114	8.73846					6	6	4	22.6	36688	48.622	2609900000	27	341	3
1438	5.45	283730	Q1	Q53H82	Q53H82	Beta-lactamase-like protein 2	LACTB2	5.43595	5.51732	5.39652	2.64162	2.70758	2.59647	9.49719	9.57856	9.45776					21	21	21	72.6	32805	266.64	12184000000	137	288	15
1439	5.45	283714	Q1	Q9GZU8;H3BP64;H3BUL4;H3BMX9;H3BTP8;H3BSY6;H3BTI2;H3BQQ6;Q6P4H7;H3BSF0;H3BU93;H3BN22;H3BPF9;H3BNK9;H3BPH9	Q9GZU8;H3BP64;H3BUL4;H3BMX9;H3BTP8;H3BSY6;H3BTI2;H3BQQ6;Q6P4H7;H3BSF0;H3BU93	Protein FAM192A	FAM192A;NIP30	5.42317	5.34701	5.57885	2.62884	2.53728	2.7788	9.15342	9.07726	9.3091					16	16	16	53.9	28912	178.82	6976400000	100	254	7
1440	5.449	283655	Q1	Q9H2H8;H7BZ14;B8ZZ77;Q9H2H8-2;C9K058;F8WC82;C9J4N2	Q9H2H8;H7BZ14;B8ZZ77;Q9H2H8-2;C9K058	Peptidyl-prolyl cis-trans isomerase-like 3;Peptidyl-prolyl cis-trans isomerase	PPIL3	5.45163	5.51418	5.38265	2.65729	2.70444	2.5826	9.41596	9.47851	9.34698					13	13	13	85.1	18154	168.72	11046000000	74	161	12
1441	5.449	283041	Q1	Q4VC31;C9JQ41;H7C525;C9JBU9	Q4VC31;C9JQ41;H7C525	Coiled-coil domain-containing protein 58	CCDC58	5.43345	5.43097	5.48212	2.63912	2.62124	2.68208	9.1637	9.16122	9.21237					8	8	8	68.8	16620	170.5	5925600000	54	144	7
1442	5.448	283025	Q1	Q9UHB9;Q9UHB9-4;Q9UHB9-2;Q9UHB9-3;K7EN53;K7EQC2	Q9UHB9;Q9UHB9-4;Q9UHB9-2	Signal recognition particle subunit SRP68	SRP68	5.42551	5.48417	5.43579	2.63118	2.67444	2.63574	9.82917	9.88784	9.83945					49	49	49	76.4	70729	323.31	26961000000	283	627	33
1443	5.448	282788	Q1	P49005;A0A087WWF6;F8W8R3;C9JLE1;C9IZD2;C9J8Z7;C9JHC7;H7C1B3	P49005;A0A087WWF6;F8W8R3;C9JLE1;C9IZD2;C9J8Z7	DNA polymerase delta subunit 2	POLD2	5.38032	5.45745	5.5073	2.58599	2.64771	2.70726	9.52074	9.59787	9.64772					24	24	24	62.5	51289	323.31	15242000000	159	469	18
1444	5.448	282689	Q1	O15160;O15160-2;E7EQB9;H0Y723;D6RDJ3;REV__P58340-2	O15160;O15160-2;E7EQB9;H0Y723	DNA-directed RNA polymerases I and III subunit RPAC1	POLR1C	5.47915	5.46512	5.40018	2.68482	2.65539	2.60014	9.54039	9.52637	9.46142					20	20	20	70.5	39249	260.94	13774000000	104	346	15
1445	5.448	282372	Q1	Q96CN7;D6RGE2	Q96CN7	Isochorismatase domain-containing protein 1	ISOC1	5.51102	5.42245	5.41061	2.71669	2.61272	2.61056	9.5423	9.45373	9.44188					14	14	14	71.8	32236	164.45	12719000000	119	298	14
1446	5.448	282225	Q1	Q9H223;Q9NZN4-2	Q9H223	EH domain-containing protein 4	EHD4	5.47986	5.4171	5.44598	2.68553	2.60737	2.64593	9.84213	9.77937	9.80825					43	39	34	76	61174	323.31	25340000000	213	541	30
1447	5.447	282091	Q1	P53990;P53990-4;P53990-2;P53990-5;H3BMU1;H3BUI0;P53990-3;H3BQF7;J3KR23;F5GXM3;P53990-6;H3BRE2;H3BPP6;H3BQ38;E9PF00	P53990;P53990-4;P53990-2;P53990-5;H3BMU1;H3BUI0;P53990-3;H3BQF7;J3KR23	IST1 homolog	IST1	5.49677	5.46158	5.38381	2.70243	2.65184	2.58376	9.42331	9.38812	9.31035					15	15	15	63.5	39750	190.16	9911300000	88	364	11
1448	5.446	281777	Q1	Q96BX8;K7ESA9;K7EPX7;K7EKK6;K7ELS3;K7ESI3;Q86TA1	Q96BX8;K7ESA9;K7EPX7;K7EKK6;K7ELS3	MOB kinase activator 3A	MOB3A	5.57296	5.4605	5.30546	2.77863	2.65076	2.50542	9.06017	8.94771	8.79267					8	8	8	37.8	25464	98.064	3283600000	40	217	4
1449	5.446	281511	Q1	Q9H0D6;Q9H0D6-2	Q9H0D6;Q9H0D6-2	5-3 exoribonuclease 2	XRN2	5.44869	5.43752	5.45158	2.65436	2.62779	2.65154	9.98705	9.97589	9.98995					69	69	69	75.1	108580	323.31	40930000000	403	950	45
1450	5.445	281508	Q1	Q9BSJ8;Q9BSJ8-2;F8VZB1	Q9BSJ8;Q9BSJ8-2	Extended synaptotagmin-1	ESYT1	5.40839	5.47931	5.44683	2.61406	2.66957	2.64679	9.98373	10.0547	10.0222					59	59	59	59.6	122850	323.31	40418000000	338	1104	49
1451	5.444	281354	Q1	P52888;K7EP46;K7EL02;P52888-2;K7EMU4;K7EIK4;K7EL32	P52888;K7EP46	Thimet oligopeptidase	THOP1	5.45238	5.45857	5.42227	2.65804	2.64883	2.62222	9.84268	9.84887	9.81257					42	42	30	40.8	78839	323.31	27155000000	217	689	32
1452	5.444	280806	Q1	Q96EE3-1;Q96EE3;K7ELV2;K7EP88;K7ENI5;K7EPZ5	Q96EE3-1;Q96EE3;K7ELV2;K7EP88	Nucleoporin SEH1	SEH1L	5.3974	5.51656	5.41851	2.60306	2.70683	2.61846	9.57258	9.69174	9.5937					21	21	21	63.2	46578	323.31	16863000000	131	421	19.5
1453	5.444	280111	Q1	Q8TDN6	Q8TDN6	Ribosome biogenesis protein BRX1 homolog	BRIX1	5.5996	5.29242	5.44026	2.80526	2.48268	2.64022	9.78578	9.4786	9.62644					22	22	22	70.5	41401	259.95	18631000000	120	353	20
1454	5.444	279239	Q1	H0YIV9;O43716;F8VRU3;J3KMY1	H0YIV9;O43716;F8VRU3	Glutamyl-tRNA(Gln) amidotransferase subunit C, mitochondrial	GATC	5.40083	5.46361	5.46656	2.6065	2.65388	2.66651	9.24023	9.303	9.30595					12	12	11	59.5	18606	146.76	7177500000	52	168	9
1455	5.444	279130	Q1	Q9Y6B6;Q9H029;D6RD69;D6R9R5;D6RDB2;D6RAA2;X1WI22	Q9Y6B6;Q9H029;D6RD69;D6R9R5	GTP-binding protein SAR1b	SAR1B;DKFZp434B2017	5.42448	5.49264	5.41344	2.63015	2.68291	2.6134	9.18469	9.25285	9.17365					17	14	14	67.2	22410	302.8	6829000000	97	198	7.5
1456	5.443	278584	Q1	P55809;E9PDW2;P55809-2;Q9BYC2	P55809;E9PDW2	Succinyl-CoA:3-ketoacid coenzyme A transferase 1, mitochondrial	OXCT1	5.4549	5.44099	5.4343	2.66056	2.63126	2.63425	9.64108	9.62717	9.62048					29	29	29	70.2	56157	323.31	18612000000	170	520	20
1457	5.443	278424	Q1	W5RWE6;Q7Z7A4;Q7Z7A4-2;Q7Z7A4-4;H7BYG4;A0A0C4DG95;Q7Z7A4-6;E9PD56;Q7Z7A4-7;Q7Z7A4-5;H7C4V0;Q7Z7A4-3;F8WDF7;C9IYJ2;U3KQS4;H7C529;F8WAW8;H7C4W2	W5RWE6;Q7Z7A4;Q7Z7A4-2;Q7Z7A4-4;H7BYG4;A0A0C4DG95;Q7Z7A4-6;E9PD56;Q7Z7A4-7;Q7Z7A4-5	PX domain-containing protein kinase-like protein	PXK	5.45215	5.46223	5.41448	2.65782	2.6525	2.61443	9.64905	9.65914	9.61138					32	32	31	55.8	63094	323.31	16789000000	228	557	20.5
1458	5.442	278414	Q1	A0A087WUB9;Q8WYA6;Q8WYA6-4;Q8WYA6-2;Q8WYA6-3;A2A2P1	A0A087WUB9;Q8WYA6;Q8WYA6-4;Q8WYA6-2;Q8WYA6-3	Beta-catenin-like protein 1	CTNNBL1	5.40705	5.45355	5.46494	2.61272	2.64381	2.6649	9.67241	9.71891	9.73031					28	28	28	46	65702	323.31	22645000000	185	568	24
1459	5.441	277639	Q1	Q9NQR4;H7C579;F8WF70	Q9NQR4;H7C579	Omega-amidase NIT2	NIT2	5.44408	5.41103	5.46677	2.64975	2.60129	2.66672	9.57227	9.53921	9.59496					19	19	19	82.2	30608	209.27	15349000000	105	276	17.5
1460	5.44	277610	Q1	O94925;H7BZD1;C9JIJ6;B7Z509;H7C201;O94925-2	O94925	Glutaminase kidney isoform, mitochondrial	GLS	5.37553	5.48856	5.45558	2.5812	2.67883	2.65553	9.80475	9.91778	9.8848					35	35	5	10	73460	323.31	31594000000	212	669	35
1461	5.44	277051	Q1	O00764;F2Z2Y4;O00764-3;O00764-2;A8MV33	O00764;F2Z2Y4;O00764-3;O00764-2	Pyridoxal kinase	PDXK	5.44855	5.47061	5.39978	2.65421	2.66088	2.59974	9.44764	9.4697	9.39888					20	20	20	67.6	35102	323.31	12717000000	147	312	13
1462	5.44	276972	Q1	Q13618;Q13618-2;Q13618-3;A0A087WTG3;H7C399;H7C1L6;A0A087X1R9	Q13618;Q13618-2;Q13618-3;A0A087WTG3	Cullin-3	CUL3	5.42302	5.46711	5.42863	2.62869	2.65738	2.62858	9.91563	9.95972	9.92123					60	60	60	68.8	88929	323.31	34226000000	349	768	40.5
1463	5.44	276887	Q1	Q9H6F5;H0YG79;Q9H6F5-2	Q9H6F5	Coiled-coil domain-containing protein 86	CCDC86	5.40865	5.482	5.42793	2.61432	2.67227	2.62789	9.54908	9.62242	9.56836					29	29	29	61.9	40235	323.31	15161000000	139	360	18
1464	5.439	276682	Q1	P62834;A0A075B6Q0	P62834;A0A075B6Q0	Ras-related protein Rap-1A	RAP1A	5.47029	5.47524	5.37295	2.67596	2.66551	2.57291	9.28486	9.28981	9.18752					16	7	7	38	20987	143.85	6270600000	52	184	8.5
1465	5.439	276614	Q1	P41223;P41223-2;C9JCD9;F8WCN7	P41223;P41223-2;C9JCD9	Protein BUD31 homolog	BUD31	5.42379	5.43502	5.45789	2.62945	2.62529	2.65784	9.21203	9.22326	9.24613					14	14	14	70.8	17000	105.02	5736100000	100	144	8
1466	5.439	276201	Q1	Q86XP3;Q86XP3-2;A0A0A0MSJ0;J3QRI2;J3KTK9;J3KRE3	Q86XP3;Q86XP3-2;A0A0A0MSJ0	ATP-dependent RNA helicase DDX42	DDX42	5.44792	5.4237	5.44499	2.65359	2.61397	2.64494	9.94586	9.92164	9.94292					52	52	52	66.6	102970	323.31	31326000000	322	938	41
1467	5.439	276115	Q1	O00267;O00267-2;M0QYL9;M0R2M5	O00267;O00267-2	Transcription elongation factor SPT5	SUPT5H	5.43553	5.41374	5.46658	2.64119	2.60401	2.66653	10.0282	10.0065	10.0593					66	66	66	61.3	121000	323.31	42105000000	352	1087	51
1468	5.438	275836	Q1	Q13895;H7BY94;F8WBL2	Q13895	Bystin	BYSL	5.47504	5.42588	5.41293	2.68071	2.61615	2.61288	9.75813	9.70897	9.69601					36	36	36	74.6	49601	323.31	20244000000	176	437	25
1469	5.437	275832	Q1	Q9Y244;A0A1W2PS02	Q9Y244;A0A1W2PS02	Proteasome maturation protein	POMP	5.51963	5.51172	5.28093	2.72529	2.70198	2.48088	9.18293	9.17502	8.94423					9	9	9	75.9	15789	89.982	4833500000	35	141	6
1470	5.437	275445	Q1	Q96J01;Q96J01-2;D6REC9;D6RGZ2;H0Y9T1;H7C0C5	Q96J01;Q96J01-2	THO complex subunit 3	THOC3	5.39816	5.40692	5.50617	2.60383	2.59719	2.70613	9.47365	9.4824	9.58165					20	20	20	72.4	38771	323.31	13316000000	127	351	15.5
1471	5.436	275369	Q1	O75306;O75306-2	O75306;O75306-2	NADH dehydrogenase [ubiquinone] iron-sulfur protein 2, mitochondrial	NDUFS2	5.40855	5.43904	5.46126	2.61422	2.62931	2.66121	9.69164	9.72213	9.74435					28	28	28	73.7	52545	323.31	22099000000	199	463	25
1472	5.436	274890	Q1	Q8NFH4;F8VTY2;H0YHK8	Q8NFH4;F8VTY2	Nucleoporin Nup37	NUP37	5.43442	5.44472	5.42872	2.64008	2.63498	2.62867	9.38026	9.39056	9.37457					17	17	17	66.9	36707	164.87	9181100000	90	326	11.5
1473	5.436	274873	Q1	P31150;G5E9U5	P31150	Rab GDP dissociation inhibitor alpha	GDI1	5.4218	5.43422	5.45097	2.62746	2.62449	2.65092	9.70489	9.71731	9.73406					40	29	29	64.7	50582	323.31	22433000000	214	447	25
1474	5.436	274792	Q1	Q15836	Q15836	Vesicle-associated membrane protein 3	VAMP3	5.44644	5.33971	5.52071	2.65211	2.52998	2.72066	9.03056	8.92384	9.10483					4	4	3	29	11309	180.21	3594900000	32	100	5
1475	5.435	274652	Q1	Q13404;I3L0A0;Q13404-7;Q13404-1;Q13404-2;Q13404-8;G3V2F7;A0A0A0MSL3;Q13404-6;E5RIF1;D6RG00	Q13404;I3L0A0;Q13404-7;Q13404-1;Q13404-2;Q13404-8;G3V2F7;A0A0A0MSL3;Q13404-6	Ubiquitin-conjugating enzyme E2 variant 1	UBE2V1;TMEM189-UBE2V1	5.41007	5.49117	5.40455	2.61573	2.68144	2.6045	9.29522	9.37632	9.2897					13	6	6	40.1	16495	60.294	7878000000	32	147	10
1476	5.435	273592	Q1	Q9BPX3;D6RA93;H0Y9Z8	Q9BPX3	Condensin complex subunit 3	NCAPG	5.45987	5.43729	5.40844	2.66554	2.62756	2.6084	10.0171	9.99454	9.96569					47	47	47	47.9	114330	323.31	37890000000	277	1015	47
1477	5.434	273412	Q1	P08397-2;P08397;F5H345;P08397-4;P08397-3;F5GY90;A0A1W2PNU5;F5H226;F5H0P4;F5H4W5;F5H4X2	P08397-2;P08397;F5H345;P08397-4;P08397-3;F5GY90;A0A1W2PNU5;F5H226	Porphobilinogen deaminase	HMBS	5.44	5.44191	5.42084	2.64567	2.63218	2.62079	9.45548	9.4574	9.43632					22	22	22	66.3	37699	234.13	10131000000	124	344	13.5
1478	5.434	273406	Q1	P42768;C9J3B7	P42768	Wiskott-Aldrich syndrome protein	WAS	5.41665	5.4619	5.42284	2.62232	2.65216	2.62279	9.64422	9.68947	9.65041					30	30	30	59	52912	323.31	18764000000	182	502	22
1479	5.433	273379	Q1	Q6DKI1;R4GMU7;Q6DKI1-2	Q6DKI1;R4GMU7;Q6DKI1-2	60S ribosomal protein L7-like 1	RPL7L1	5.46666	5.36585	5.46738	2.67233	2.55612	2.66733	9.35182	9.251	9.35253					16	16	16	61	28661	110.6	8958800000	76	246	10
1480	5.433	273151	Q1	Q92556;Q92556-3;H7C0S6;Q92556-2;H7C3P3;C9JIW2;C9IZR8;H7C0N5;C9JB20;C9J5X3	Q92556	Engulfment and cell motility protein 1	ELMO1	5.3996	5.43355	5.46521	2.60527	2.62382	2.66517	9.87582	9.90976	9.94143					50	50	43	63.1	83829	323.31	32141000000	275	727	39
1481	5.433	272898	Q1	Q562R1	Q562R1	Beta-actin-like protein 2	ACTBL2	4.96509	4.92109	6.41207	2.17075	2.11136	3.61202	9.17246	9.12846	10.6194					11	4	4	21.8	42003	6.9183	47870000000	11	376	21
1482	5.431	272802	Q1	Q9GZN8;Q9GZN8-2;H7BYU9	Q9GZN8;Q9GZN8-2;H7BYU9	UPF0687 protein C20orf27	C20orf27	5.42068	5.38685	5.48653	2.62635	2.57711	2.68649	9.26007	9.22624	9.32593					13	13	13	81.6	19291	323.31	8361200000	100	174	9
1483	5.431	272789	Q1	O94903;E5RG77;E5RFX7;H0YBG2;E5RFZ4	O94903;E5RG77;E5RFX7	Proline synthase co-transcribed bacterial homolog protein	PROSC	5.38569	5.45541	5.45167	2.59136	2.64568	2.65162	9.27084	9.34056	9.33682					12	12	12	62.2	30344	107.5	8402500000	82	275	10
1484	5.43	272716	Q1	Q8IX12-2;Q8IX12;A0A0C4DGG8;F5H2E6;F5H1H2;F5H3E1;H0YFJ7;F5H7M9	Q8IX12-2;Q8IX12;A0A0C4DGG8;F5H2E6;F5H1H2	Cell division cycle and apoptosis regulator protein 1	CCAR1	5.41788	5.44575	5.42502	2.62355	2.63602	2.62497	9.90509	9.93296	9.91223					52	52	52	49.3	131040	323.31	34134000000	342	1135	40
1485	5.429	272086	Q1	P53985;Q5T8R5;Q5T8R3;P53985-2;Q5T8R4	P53985;Q5T8R5;Q5T8R3;P53985-2	Monocarboxylate transporter 1	SLC16A1	5.34982	5.39442	5.54215	2.55549	2.58469	2.7421	9.21269	9.25729	9.40502					9	9	9	14.4	53944	294.04	8216600000	48	500	9.5
1486	5.429	271865	Q1	O60256;O60256-3;O60256-2;E7EPA1;O60256-4;C9K0K7;C9JJS3;C9JDU5;I3L0S1;C9JDH0;E7EW35;I3L164;I3L331;I3L1T1;I3L3B8;I3L2J4;I3L4G9;I3L275	O60256;O60256-3;O60256-2;E7EPA1;O60256-4;C9K0K7;C9JJS3;C9JDU5;I3L0S1	Phosphoribosyl pyrophosphate synthase-associated protein 2	PRPSAP2	5.41379	5.43463	5.43736	2.61946	2.6249	2.63732	9.52939	9.55023	9.55296					22	22	21	71	40925	323.31	14302000000	138	369	17
1487	5.427	271808	Q1	P60510;H3BTA2;H3BV22;I3L4X0;H3BPN5;H3BVE3	P60510;H3BTA2;H3BV22	Serine/threonine-protein phosphatase 4 catalytic subunit;Serine/threonine-protein phosphatase	PPP4C	5.40346	5.42389	5.45451	2.60913	2.61416	2.65447	9.40255	9.42298	9.45361					20	18	18	72.6	35080	186.67	10002000000	82	307	13
1488	5.427	271402	Q1	O60832;O60832-2;C9IYT0;H7C0M1;H7C2Q9;H7C2Q2;H7BZF2	O60832;O60832-2;C9IYT0	H/ACA ribonucleoprotein complex subunit 4	DKC1	5.54979	5.3935	5.33717	2.75546	2.58377	2.53712	9.84992	9.69362	9.63729					35	35	35	64.4	57673	323.31	20212000000	189	514	26
1489	5.426	271235	Q1	Q969Z0;Q969Z0-2;C9J7P5;C9IZN7;H7C4R5;C9J5A2;C9J347;C9J618	Q969Z0;Q969Z0-2;C9J7P5;C9IZN7	Protein TBRG4	TBRG4	5.41258	5.45679	5.40918	2.61824	2.64706	2.60914	9.59876	9.64297	9.59536					31	31	31	59.9	70737	323.31	16681000000	149	631	20
1490	5.426	270448	Q1	Q5TCJ5;Q9H3S1;Q9H3S1-2;Q5TCI6;Q5TCI4;A0A0J9YVY6;Q5TCJ7	Q5TCJ5;Q9H3S1;Q9H3S1-2;Q5TCI6	Semaphorin-4A	SEMA4A	5.38074	5.48046	5.41538	2.58641	2.67073	2.61533	9.66383	9.76356	9.69847					26	26	25	45.8	79712	323.31	19901000000	172	723	25
1491	5.425	268975	Q1	O15126;O15126-2;A0A087WXB0;A0A087WU14;A0A087WZA6;A0A087WTX8	O15126;O15126-2;A0A087WXB0	Secretory carrier-associated membrane protein 1	SCAMP1	5.38152	5.45744	5.43512	2.58718	2.64771	2.63508	9.38061	9.45653	9.43422					13	13	13	40.5	37920	279.68	10488000000	78	338	13
1492	5.424	268362	Q1	P43897;P43897-2;C9JT21;C9JG32;F8VPA7;F8VS27;P43897-4;P43897-3;F8WCK2	P43897;P43897-2;C9JT21	Elongation factor Ts, mitochondrial;Elongation factor Ts	TSFM	5.40449	5.5015	5.36739	2.61016	2.69176	2.56734	9.52009	9.6171	9.48299					15	15	15	57.8	35390	252.51	14948000000	114	325	17
1493	5.424	268045	Q1	P08473;C9JR96;C9J9X7;C9IYX7;C9JDZ3;A0A087WWM7;Q3KQS6	P08473	Neprilysin	MME	5.41017	5.42816	5.43485	2.61584	2.61842	2.63481	9.89738	9.91537	9.92207					45	45	45	56.3	85513	323.31	33061000000	258	750	40
1494	5.424	267817	Q1	Q14008;Q14008-2;Q14008-3;H0YDX5;E9PQH5;H0YEK7;H0YCF6	Q14008;Q14008-2;Q14008-3	Cytoskeleton-associated protein 5	CKAP5	5.41568	5.40861	5.44879	2.62134	2.59888	2.64874	10.3261	10.3191	10.3592					128	128	128	66.1	225490	323.31	87687000000	723	2032	106
1495	5.424	267791	Q1	Q5TFE4;Q5TFE4-2;Q5QPD0;H0YDA5	Q5TFE4;Q5TFE4-2	5-nucleotidase domain-containing protein 1	NT5DC1	5.38556	5.44104	5.44396	2.59123	2.6313	2.64391	9.64178	9.69726	9.70017					25	25	25	67	51844	323.31	19263000000	180	455	23.5
1496	5.423	267618	Q1	Q58FF6	Q58FF6	Putative heat shock protein HSP 90-beta 4	HSP90AB4P	5.57284	5.36625	5.32993	2.77851	2.55651	2.52988	9.85593	9.64934	9.61302					7	1	1	2.2	58264	5.2644	17269000000	54	505	25
1497	5.423	267387	Q1	Q9UBV8	Q9UBV8	Peflin	PEF1	5.49743	5.53853	5.23233	2.7031	2.72879	2.43228	9.28567	9.32677	9.02057					7	7	7	38.4	30381	36.803	6333000000	46	284	8
1498	5.423	267135	Q1	O95816;O95816-2	O95816;O95816-2	BAG family molecular chaperone regulator 2	BAG2	5.41934	5.41025	5.43835	2.62501	2.60051	2.63831	9.43482	9.42573	9.45384					14	14	14	68.7	23772	323.31	10855000000	103	211	13.5
1499	5.422	266593	Q1	Q02535	Q02535	DNA-binding protein inhibitor ID-3	ID3	5.35197	5.51256	5.40099	2.55764	2.70283	2.60094	8.83918	8.99977	8.8882					6	6	6	47.1	12999	73.169	2877500000	35	119	4
1500	5.42	265897	Q1	A0A140TA86;Q5XKP0;K7EIR2;A0A140TA84	A0A140TA86;Q5XKP0	Protein QIL1	QIL1	5.36653	5.32179	5.57276	2.5722	2.51206	2.77272	8.95065	8.90591	9.15688					5	5	5	62.1	15436	104.13	4045300000	57	140	5
1501	5.42	265778	Q1	Q9BVJ6;Q9BVJ6-3;Q9BVJ6-2;Q5TAP6;X6RJY0	Q9BVJ6;Q9BVJ6-3;Q9BVJ6-2	U3 small nucleolar RNA-associated protein 14 homolog A	UTP14A	5.40086	5.43659	5.42335	2.60653	2.62685	2.62331	9.84232	9.87804	9.86481					43	43	43	56.3	87977	323.31	27232000000	243	771	36
1502	5.42	265667	Q1	Q9Y314;A0A075B6F9;M0R3B2;M0R1K2;A0A075B797;M0QX85;M0R1T7	Q9Y314;A0A075B6F9;M0R3B2	Nitric oxide synthase-interacting protein	NOSIP	5.39895	5.45046	5.41123	2.60461	2.64073	2.61118	9.51455	9.56606	9.52683					19	19	19	68.1	33172	221.63	13071000000	117	301	17
1503	5.42	265004	Q1	Q9BXY0;H0YBV6	Q9BXY0;H0YBV6	Protein MAK16 homolog	MAK16	5.38924	5.38329	5.4866	2.5949	2.57355	2.68655	9.27439	9.26844	9.37175					11	11	11	41	35368	236.69	7650800000	59	300	10
1504	5.42	264731	Q1	E7ETB3;Q9ULA0;E7EMB6;C9JBE1;F8WAN0;C9J1E2	E7ETB3;Q9ULA0;E7EMB6;C9JBE1	Aspartyl aminopeptidase	DNPEP	5.38755	5.42034	5.45097	2.59321	2.6106	2.65093	9.55145	9.58424	9.61488					27	27	17	45.2	54502	323.31	15691000000	187	493	19
1505	5.419	264538	Q1	Q969X6;H3BSH7;Q969X6-3;Q969X6-2;A0A0J9YWM9;A0A0J9YWK2;A0A0J9YXV4;H3BPD7;I3L4T9;J3KSI1;H3BRM8;J3KTR0;J3KSE6;A0A0J9YX18	Q969X6;H3BSH7;Q969X6-3;Q969X6-2;A0A0J9YWM9;A0A0J9YWK2;A0A0J9YXV4	Cirhin	CIRH1A	5.38349	5.44407	5.43089	2.58916	2.63434	2.63085	9.68361	9.7442	9.73102					33	33	33	61.5	76889	323.31	21000000000	201	686	26
1506	5.419	264507	Q1	Q9UJY4;H3BMM6;H3BPI3;I3L2C4;H3BMN6;I3L263	Q9UJY4	ADP-ribosylation factor-binding protein GGA2	GGA2	5.42887	5.41146	5.41566	2.63453	2.60173	2.61562	9.69423	9.67682	9.68102					34	34	32	57.7	67150	323.31	18508000000	187	613	24
1507	5.419	264455	Q1	Q9Y512	Q9Y512	Sorting and assembly machinery component 50 homolog	SAMM50	5.38165	5.5064	5.36789	2.58732	2.69667	2.56785	9.7292	9.85395	9.71544					30	30	30	58.8	51976	323.31	23668000000	151	469	29
[truncated: 6,579 more rows]

## Sheet: Top 50 proteins
Mean Copy number rank	Mean LOG10 Copy number	Mean Copy number	Quantile	Protein IDs	Majority protein IDs	Protein names	Gene names	B cell specific	V(D)J recombination	Histones	Cytoskeleton	Translation / Splicing	Glycolysis	Chaperone	Cancer /MYC related function	Others
[truncated: 50 more rows]

## Sheet: PTKs
							LOG10						LOG10
[truncated: 31 more rows]

[truncated: 1 more sheets: PTPs]
