# Supplementary material for: Quantitative proteomics identifies PTP1B as modulator of B cell antigen receptor signaling
Source: Life Sci Alliance. 2021 Sep 15;4(11):e202101084. doi: 10.26508/lsa.202101084 (PMC8473724; doi:10.26508/lsa.202101084)
Supplement: Supplementary file 3 [file LSA-2021-01084_TableS3.xlsx]

## Sheet: Information
	Quantitative Proteomics Identifies PTP1B as Modulator of B Cell Antigen Receptor Signaling
	Jennifer J. Schwarz, Lorenz Grundmann, Thomas Kokot, Kathrin Kläsener, Sandra Fotteler, David Medgyesi, Maja Köhn, Michael Reth, Bettina Warscheid
Supplemental Table 3	Comparison of the copy numbers in Ramos B cells to naïve B cells from Rieckmann et al. 2017
Ramos B cells_Mean LOG10 copy number	Mean of the log10 transformed copy numbers
Naive B cells_Mean LOG10 copy number (Rieckmann, 2017)	Mean of the log10 transformed copy numbers from Rieckmann et al. 2017	Rieckmann J. C., Geiger R., Hornburg D., Wolf T., Kveler K., Jarrossay D., Sallusto F., Shen-Orr S. S., Lanzavecchia A., Mann M., and Meissner F., Social network architecture of human immune cells unveiled by quantitative proteomics. Nat Immunol, 2017, 18 pp.583-593.
Protein IDs	Identifiers of the proteins contained in the protein group, sorted by number of identified peptides in descending order
Majority protein IDs	These are the IDs of those proteins that have at least half of the peptides that the leading protein has
Protein names	Names of all proteins in this group
Gene names	Gene names belonging to the proteins in this group
"classical" Protein Tyrosine Phosphatase	Indicates with a "+" that the protein is a "classical" protein tyrosine phosphatase
Protein Tyrosine Kinase	Indicates with a "+" that the protein is a protein tyrosine kinase

## Sheet: Copy number comparison
Ramos B cells_Mean LOG10 copy number	Naive B cells_Mean LOG10 copy number (Rieckmann, 2017)	Protein IDs	Majority protein IDs	Protein names	Gene names	"classical" Protein Tyrosine Phosphatase	Protein Tyrosine Kinase
8.053	7.76683	P62805	P62805	Histone H4	HIST1H4A
7.775	7.61723	Q16777	Q16777	Histone H2A type 2-C	HIST2H2AC
7.754	7.06985	K7EK07;P84243;K7EMV3;B4DEB1;K7ES00;Q6NXT2;K7EP01	K7EK07;P84243;K7EMV3;B4DEB1;K7ES00;Q6NXT2	Histone H3;Histone H3.3;Histone H3.3C	H3F3B;H3F3A;H3F3C
7.648	7.42871	P60709;E7EVS6;G5E9R0;C9JZR7;C9JUM1;C9JTX5	P60709	Actin, cytoplasmic 1;Actin, cytoplasmic 1, N-terminally processed	ACTB
7.62	7.02763	P62937;F8WE65;C9J5S7;P62937-2;P0DN26;A0A0H2UH34;A0A0B4J2A2;A0A075B767;A0A075B759;Q9Y536;F5H284;E5RIZ5;P0DN37	P62937;F8WE65;C9J5S7;P62937-2	Peptidyl-prolyl cis-trans isomerase A;Peptidyl-prolyl cis-trans isomerase A, N-terminally processed;Peptidyl-prolyl cis-trans isomerase	PPIA
7.61	6.73553	P04406;E7EUT5	P04406;E7EUT5	Glyceraldehyde-3-phosphate dehydrogenase	GAPDH
7.538	NaN	Q8N257	Q8N257	Histone H2B type 3-B	HIST3H2BB
7.404	6.17794	P68371;M0R2D3;M0QY85;M0QZL7;M0R278;M0R0X0;M0QY37;M0QX14;M0R2T4;A0A075B724	P68371	Tubulin beta-4B chain	TUBB4B
7.37	3.05318	Q9BQE3;F5H5D3;A0A1W2PQM2	Q9BQE3;F5H5D3;A0A1W2PQM2	Tubulin alpha-1C chain	TUBA1C
7.362	6.15599	P08238;Q58FF7	P08238	Heat shock protein HSP 90-beta	HSP90AB1
7.343	6.12826	P00338;P00338-3;P00338-4;P00338-5;P00338-2;F5GXY2;F5GYU2;F5GXH2;F5H5J4;F5H6W8;F5GZQ4;F5H8H6;F5GXC7;F5GWW2;F5GXU1;A0A087WUM2;Q6ZMR3	P00338;P00338-3;P00338-4;P00338-5;P00338-2	L-lactate dehydrogenase A chain	LDHA
7.341	6.92669	P62979	P62979	Ubiquitin-40S ribosomal protein S27a;Ubiquitin;40S ribosomal protein S27a	RPS27A
7.34	6.04264	P09211;A8MX94;A0A087X2E9;A0A087X243	P09211;A8MX94	Glutathione S-transferase P	GSTP1
7.333	6.56829	P06733;P06733-2;K7EM90;E5RI09;E5RG95;K7EPM1;K7EKN2	P06733;P06733-2	Alpha-enolase	ENO1
7.329	6.34232	P68104;Q5VTE0;A0A087WVQ9;P68104-2;A0A087WV01;Q5JR01;A6PW80	P68104;Q5VTE0;A0A087WVQ9;P68104-2;A0A087WV01	Elongation factor 1-alpha 1;Putative elongation factor 1-alpha-like 3;Elongation factor 1-alpha	EEF1A1;EEF1A1P5
7.322	7.09839	P23528;G3V1A4;E9PK25;E9PP50;E9PQB7;E9PLJ3;E9PS23	P23528;G3V1A4;E9PK25;E9PP50;E9PQB7;E9PLJ3	Cofilin-1	CFL1
7.268	6.47043	P05387;H0YDD8;P05386-2	P05387;H0YDD8	60S acidic ribosomal protein P2	RPLP2
7.247	6.98083	P63104;E7EX29;B0AZS6;P63104-2;B7Z2E6;H0YB80;E7ESK7;E5RIR4;E9PD24;E7EVZ2;E5RGE1	P63104;E7EX29;B0AZS6;P63104-2;B7Z2E6;H0YB80;E7ESK7	14-3-3 protein zeta/delta	YWHAZ
7.209	5.98404	P14174	P14174	Macrophage migration inhibitory factor	MIF
7.206	6.45969	P09651;F8W6I7;P09651-3;P09651-2;F8VZ49;F8VTQ5;F8VYN5;F8W646;H0YH80	P09651;F8W6I7;P09651-3;P09651-2;F8VZ49;F8VTQ5;F8VYN5	Heterogeneous nuclear ribonucleoprotein A1;Heterogeneous nuclear ribonucleoprotein A1, N-terminally processed	HNRNPA1
7.193	5.92484	P07108;B8ZWD1;A0A0A0MTI5;P07108-3;P07108-2;P07108-4;P07108-5;P07108-6	P07108;B8ZWD1;A0A0A0MTI5;P07108-3;P07108-2;P07108-4;P07108-5	Acyl-CoA-binding protein	DBI
7.189	6.36274	P11142;E9PKE3;E9PNE6;P11142-2;E9PN89;E9PLF4;E9PQQ4;E9PQK7;E9PK54;E9PPY6;E9PN25	P11142;E9PKE3;E9PNE6;P11142-2;E9PN89	Heat shock cognate 71 kDa protein	HSPA8
7.185	6.5512	Q06830;A0A0A0MSI0;A0A0A0MRQ5	Q06830;A0A0A0MSI0	Peroxiredoxin-1	PRDX1
7.182	6.10897	P07195;A8MW50;C9J7H8;F5H793;F5H5G7;F5H155;G3XAP5;F5H245;P07864	P07195;A8MW50	L-lactate dehydrogenase B chain;L-lactate dehydrogenase	LDHB
7.152	6.30172	P10809;E7ESH4;E7EXB4;P10809-2;C9JL25;C9JL19;C9JCQ4;C9J0S9;F8WBB1	P10809	60 kDa heat shock protein, mitochondrial	HSPD1
7.151	7.12046	P07737;K7EJ44;I3L3D5	P07737;K7EJ44	Profilin-1	PFN1
7.137	6.42431	P06748;P06748-2;P06748-3;E5RGW4	P06748;P06748-2;P06748-3	Nucleophosmin	NPM1
7.108	6.18347	P13639;M0R0I6	P13639	Elongation factor 2	EEF2
7.107	6.81741	P22626;P22626-2;A0A087WUI2	P22626;P22626-2;A0A087WUI2	Heterogeneous nuclear ribonucleoproteins A2/B1	HNRNPA2B1
7.077	4.98966	P14618;P14618-3;B4DNK4;H3BQ34;H3BUW1;H3BTJ2;H3BT25;H3BU13;H3BN34;H3BQZ3	P14618;P14618-3;B4DNK4	Pyruvate kinase PKM;Pyruvate kinase	PKM
7.073	6.60596	Q5T7C4;P09429;B2RPK0	Q5T7C4;P09429;B2RPK0	High mobility group protein B1;Putative high mobility group protein B1-like 1	HMGB1;HMGB1P1
7.071	6.38108	P05386	P05386	60S acidic ribosomal protein P1	RPLP1
7.069	6.27943	P04075;J3KPS3;P04075-2;H3BQN4;H3BPS8;H3BUH7;H3BR04;H3BMQ8;H3BU78;H3BR68;A0A087WXX2;P05062	P04075;J3KPS3;P04075-2;H3BQN4;H3BPS8;H3BUH7	Fructose-bisphosphate aldolase A;Fructose-bisphosphate aldolase	ALDOA
7.062	6.12274	P62857	P62857	40S ribosomal protein S28	RPS28
7.043	6.53533	P06576;H0YH81;F8W079;H0YI37	P06576;H0YH81;F8W079	ATP synthase subunit beta, mitochondrial;ATP synthase subunit beta	ATP5B
7.029	NaN	P01704	P01704	Ig lambda chain V-II region TOG
7.007	6.24398	P62263;E5RH77;H0YB22	P62263;E5RH77	40S ribosomal protein S14	RPS14
6.997	6.37253	P62826;J3KQE5;F5H018;B5MDF5;B4DV51;H0YFC6;A0A087X0W0	P62826;J3KQE5;F5H018;B5MDF5	GTP-binding nuclear protein Ran	RAN
6.993	5.39377	Q01469;I6L8B7;A8MUU1;REV__Q99880;REV__Q99879;REV__Q99877;REV__Q93079;REV__Q8N257;REV__Q5QNW6;REV__Q16778;REV__P62807;REV__P58876;REV__P57053;REV__P33778;REV__P23527;REV__P06899;REV__O60814;REV__Q5QNW6-2;REV__U3KQK0	Q01469;I6L8B7	Fatty acid-binding protein, epidermal	FABP5
6.989	6.07445	P26583;D6R9A6	P26583;D6R9A6	High mobility group protein B2	HMGB2
6.985	5.89097	P22392-2;Q32Q12;J3KPD9	P22392-2;Q32Q12;J3KPD9	Nucleoside diphosphate kinase	NME1-NME2;NME2
6.976	NaN	B4DY08	B4DY08		HNRNPC
6.969	6.06896	C9J9K3;A0A0C4DG17;P08865;F8WD59	C9J9K3;A0A0C4DG17;P08865	40S ribosomal protein SA	RPSA
6.967	6.69433	P60174;P60174-1;P60174-4;U3KPZ0;U3KQF3;U3KPS5	P60174;P60174-1;P60174-4	Triosephosphate isomerase	TPI1
6.959	6.39211	P40926;P40926-2;G3XAL0	P40926;P40926-2;G3XAL0	Malate dehydrogenase, mitochondrial;Malate dehydrogenase	MDH2
6.94	6.29485	P23396;P23396-2;E9PL09;E9PPU1;F2Z2S8;H0YCJ7;H0YEU2;E9PQ96;E9PJH4;H0YF32;E9PSF4;E9PQX2;H0YES8	P23396;P23396-2;E9PL09;E9PPU1;F2Z2S8;H0YCJ7;H0YEU2	40S ribosomal protein S3	RPS3
6.924	6.59581	P61978-2;P61978;S4R457	P61978-2;P61978	Heterogeneous nuclear ribonucleoprotein K	HNRNPK
6.921	NaN	P09936;D6RE83;D6R956;D6R974;D6RF53	P09936;D6RE83;D6R956;D6R974	Ubiquitin carboxyl-terminal hydrolase isozyme L1;Ubiquitin carboxyl-terminal hydrolase	UCHL1
6.92	5.97204	P62314;J3QLI9;J3QLR7	P62314;J3QLI9	Small nuclear ribonucleoprotein Sm D1	SNRPD1
6.915	6.5786	P13796;Q5TBN3;P13796-2;Q5TBN5;U3KQI3	P13796	Plastin-2	LCP1
6.91	6.30561	P62081;B5MCP9	P62081;B5MCP9	40S ribosomal protein S7	RPS7
6.89	6.44373	P0DP25;P0DP24;P0DP23;H0Y7A7;M0QZ52;F8WBR5;G3V479	P0DP25;P0DP24;P0DP23;H0Y7A7		CALM2
6.889	6.39494	P25398	P25398	40S ribosomal protein S12	RPS12
6.888	6.02693	P60866;P60866-2;G3XAN0;E5RJX2;E5RIP1	P60866;P60866-2;G3XAN0	40S ribosomal protein S20	RPS20
6.886	6.74798	P31146;H3BRY3;H3BRJ0	P31146;H3BRY3	Coronin-1A;Coronin	CORO1A
6.885	6.4148	P25705;P25705-2;P25705-3;K7EK77;K7ENJ4;K7ERX7;K7EJP1;K7EQH4;K7ESA0;K7EM08	P25705;P25705-2;P25705-3	ATP synthase subunit alpha, mitochondrial	ATP5A1
6.884	6.54401	P37802;X6RJP6;P37802-2;C9J5W6	P37802;X6RJP6;P37802-2	Transgelin-2	TAGLN2
6.876	5.35951	Q01105;A0A0C4DFV9;Q01105-3;Q01105-4;B2REB7	Q01105;A0A0C4DFV9;Q01105-3;Q01105-4	Protein SET	SET
6.874	6.355	Q14103-3;Q14103;H0YA96;H0Y8G5;Q14103-4;Q14103-2;D6RAF8;D6RD83;D6RF44;D6RBQ9	Q14103-3;Q14103;H0YA96;H0Y8G5;Q14103-4;Q14103-2;D6RAF8	Heterogeneous nuclear ribonucleoprotein D0	HNRNPD
6.873	6.26523	P61604;B8ZZL8;B8ZZ54	P61604;B8ZZL8	10 kDa heat shock protein, mitochondrial	HSPE1
6.873	6.46615	P00558;P00558-2	P00558;P00558-2	Phosphoglycerate kinase 1	PGK1
6.872	5.74912	P11021	P11021	78 kDa glucose-regulated protein	HSPA5
6.872	6.74537	P63313	P63313	Thymosin beta-10	TMSB10
6.87	6.37178	P19338;C9JYW2;C9JLB1;C9J1H7;C9JWL1	P19338	Nucleolin	NCL
6.868	5.98386	P63241;I3L397;I3L504;P63241-2;Q6IS14	P63241;I3L397;I3L504;P63241-2;Q6IS14	Eukaryotic translation initiation factor 5A-1;Eukaryotic translation initiation factor 5A;Eukaryotic translation initiation factor 5A-1-like	EIF5A;EIF5AL1
6.864	5.95831	Q9P1F3;Q5SZC9	Q9P1F3	Costars family protein ABRACL	ABRACL
6.863	5.78824	P07900;P07900-2;G3V2J8	P07900;P07900-2	Heat shock protein HSP 90-alpha	HSP90AA1
6.859	5.21031	O00148;O00148-2;O00148-3;K7EQN7;K7EPJ3;K7EN69;K7EIL8;K7ENP6;K7EL56;F6SXL5	O00148;O00148-2;O00148-3;K7EQN7	ATP-dependent RNA helicase DDX39A	DDX39A
6.858	4.71326	E9PAV3;F8VZJ2;H0YHX9;Q13765;E9PAV3-2;F8W0W4;F8W1N5;F8VNW4;F8VZ58	E9PAV3;F8VZJ2;H0YHX9;Q13765;E9PAV3-2;F8W0W4;F8W1N5;F8VNW4	Nascent polypeptide-associated complex subunit alpha, muscle-specific form;Nascent polypeptide-associated complex subunit alpha	NACA
6.844	5.66528	Q5JP53;P07437;Q5ST81;A6NNZ2;M0R1I1	Q5JP53;P07437;Q5ST81	Tubulin beta chain	TUBB
6.84	6.75689	P52566;F5H3P3;F5H6Q0;F5H2R5	P52566;F5H3P3;F5H6Q0	Rho GDP-dissociation inhibitor 2	ARHGDIB
6.838	6.18354	P35268;K7ERI7;K7ELC4;K7EMH1;K7EP65;K7EKS7;K7EJT5	P35268;K7ERI7;K7ELC4;K7EMH1;K7EP65;K7EKS7	60S ribosomal protein L22	RPL22
6.832	6.16966	Q8WVC2;P63220;Q9BYK1;Q9BYK2	Q8WVC2;P63220;Q9BYK1	40S ribosomal protein S21	RPS21
6.831	6.19225	P62851	P62851	40S ribosomal protein S25	RPS25
6.83	7.12599	P62328;CON__P21752	P62328	Thymosin beta-4;Hematopoietic system regulatory peptide	TMSB4X
6.823	5.75842	P52565;J3KTF8;J3QQX2;J3KRE2;P52565-2;J3KRY1;J3KS60	P52565;J3KTF8;J3QQX2;J3KRE2;P52565-2;J3KRY1	Rho GDP-dissociation inhibitor 1	ARHGDIA
6.817	6.27397	P51991;H7C1J8	P51991	Heterogeneous nuclear ribonucleoprotein A3	HNRNPA3
6.815	5.74436	P49773;D6REP8;D6RE99;D6RC06	P49773	Histidine triad nucleotide-binding protein 1	HINT1
6.813	6.10273	P23284	P23284	Peptidyl-prolyl cis-trans isomerase B	PPIB
6.811	6.0586	P63244;J3KPE3;D6RAC2;H0YAF8;D6RHH4;H0Y8W2;D6REE5;H0YAM7;D6R9Z1;D6R9L0;D6RAU2;E9PD14;D6RFX4;D6RFZ9;D6RBD0;D6RF23;D6RHJ5;D6R909;H0Y8R5;D6RGK8;H0Y9P0;D6RDI0	P63244;J3KPE3;D6RAC2;H0YAF8;D6RHH4;H0Y8W2;D6REE5;H0YAM7;D6R9Z1;D6R9L0;D6RAU2;E9PD14;D6RFX4;D6RFZ9	Guanine nucleotide-binding protein subunit beta-2-like 1;Guanine nucleotide-binding protein subunit beta-2-like 1, N-terminally processed	GNB2L1
6.803	5.91336	P46777;Q5T7N0;R4GNJ2	P46777	60S ribosomal protein L5	RPL5
6.799	6.21078	P61247;D6RAT0;D6RG13;E9PFI5;H0Y8L7;D6RB09;H0Y9Y4;D6R9B6;D6RAS7;D6RED7;D6RI02;D6RGE0	P61247;D6RAT0;D6RG13;E9PFI5;H0Y8L7;D6RB09;H0Y9Y4;D6R9B6	40S ribosomal protein S3a	RPS3A
6.797	5.94469	P46778;M0R181;G3V1B3	P46778;M0R181	60S ribosomal protein L21	RPL21
6.792	6.06182	P29401;P29401-2;E9PFF2;F8W888;F8WAX4	P29401;P29401-2	Transketolase	TKT
6.787	6.0793	P05388-2	P05388-2
6.784	6.11241	P18669;P15259;Q8N0Y7	P18669	Phosphoglycerate mutase 1	PGAM1
6.774	6.29974	Q00839;Q00839-2;A0A1W2PPS1;A0A1W2PP35;A0A1X7SBS1;Q5RI18;A0A1W2PPH7;A0A1W2PPL4;A0A1W2PQL0;A0A1W2PP34;A0A1W2PQ74;A0A1W2PRZ7;A0A1W2PQD4;A0A1W2PRI6;A0A1W2PPE9;A0A1W2PNG3;A0A087WVI9;A0A087WZF3;A0A1W2PP22	Q00839;Q00839-2;A0A1W2PPS1;A0A1W2PP35;A0A1X7SBS1;Q5RI18;A0A1W2PPH7;A0A1W2PPL4;A0A1W2PQL0;A0A1W2PP34;A0A1W2PQ74;A0A1W2PRZ7	Heterogeneous nuclear ribonucleoprotein U	HNRNPU
6.773	6.06484	Q15365	Q15365	Poly(rC)-binding protein 1	PCBP1
6.773	6.19508	P50395;P50395-2;Q5SX87;Q5SX86;Q5SX91;V9GYF8;Q5SX90;V9GYJ7	P50395;P50395-2;Q5SX87	Rab GDP dissociation inhibitor beta	GDI2
6.77	5.72887	P60842;J3KT12;P60842-2;J3QS69;J3KTB5;J3KSZ0;J3QL43;J3KTN0;J3QR64;J3KS25;J3QL52;J3KS93;J3KT04;J3QQP0	P60842;J3KT12;P60842-2;J3QS69;J3KTB5;J3KSZ0;J3QL43	Eukaryotic initiation factor 4A-I	EIF4A1
6.767	6.13596	P62244;I3L3P7;I3L246;H3BV27;H3BT37;I3L303;H3BVC7	P62244;I3L3P7;I3L246	40S ribosomal protein S15a	RPS15A
6.764	6.07412	P15880;H0YEN5;E9PQD7;E9PMM9;I3L404;E9PM36;E9PPT0;H3BNG3;H0YE27	P15880;H0YEN5;E9PQD7;E9PMM9;I3L404;E9PM36;E9PPT0	40S ribosomal protein S2	RPS2
6.763	6.3611	P84103-2;P84103;A0A087X2D0	P84103-2;P84103;A0A087X2D0	Serine/arginine-rich splicing factor 3	SRSF3
6.756	6.35972	Q71UI9;P0C0S5;C9J0D1;Q71UI9-4;Q71UI9-2;Q71UI9-3;C9J386;Q71UI9-5	Q71UI9;P0C0S5;C9J0D1;Q71UI9-4;Q71UI9-2;Q71UI9-3;C9J386	Histone H2A.V;Histone H2A.Z;Histone H2A	H2AFV;H2AFZ
6.752	6.2038	P62888;E5RI99;A0A0B4J213;A0A0C4DH44;E5RJH3	P62888;E5RI99	60S ribosomal protein L30	RPL30
6.752	5.90667	P15311;E7EQR4;E9PNP4	P15311;E7EQR4	Ezrin	EZR
6.747	6.06847	P01871;A0A1B0GUU9;P01871-2;P04220	P01871;A0A1B0GUU9;P01871-2;P04220	Ig mu chain C region;Ig mu heavy chain disease protein	IGHM
6.746	6.11315	P61353;K7ELC7;K7EQQ9;K7ERY7	P61353;K7ELC7;K7EQQ9	60S ribosomal protein L27	RPL27
6.744	5.71759	P06744;A0A0A0MTS2;P06744-2;K7EQ48;A0A0J9YXP8;A0A0J9YYH3;A0A0J9YX90;K7EPY4;K7EP41;K7ENA0;K7ERC6;K7ELR7;K7ERK8;K7EIL4;Q8N196	P06744;A0A0A0MTS2;P06744-2;K7EQ48;A0A0J9YXP8;A0A0J9YYH3;A0A0J9YX90	Glucose-6-phosphate isomerase	GPI
6.742	5.71832	Q9UQ80;Q9UQ80-2;F8VR77;F8W0A3;H0YIN7;F8VZ69	Q9UQ80;Q9UQ80-2;F8VR77	Proliferation-associated protein 2G4	PA2G4
6.738	5.82992	P17987;E7EQR6;E7ERF2;F5H282;F5GZ03;F5GZI8;F5GYL4;F5H7Y1	P17987;E7EQR6;E7ERF2;F5H282	T-complex protein 1 subunit alpha	TCP1
6.735	6.70373	B8ZZQ6;P06454-2;P06454;B8ZZA1;B8ZZW7;H7C2N1	B8ZZQ6;P06454-2;P06454;B8ZZA1;B8ZZW7;H7C2N1	Prothymosin alpha;Prothymosin alpha, N-terminally processed;Thymosin alpha-1	PTMA
6.729	6.0292	P32969;H0Y9V9;D6RAN4;E7ESE0;H0Y9R4	P32969;H0Y9V9;D6RAN4;E7ESE0	60S ribosomal protein L9	RPL9
6.725	6.00013	Q13185;S4R2Y4	Q13185;S4R2Y4	Chromobox protein homolog 3	CBX3
6.724	5.9039	P27797;K7EJB9;K7EL50	P27797;K7EJB9	Calreticulin	CALR
6.722	5.68479	P00441;H7BYH4	P00441;H7BYH4	Superoxide dismutase [Cu-Zn]	SOD1
6.718	6.12347	P30101	P30101	Protein disulfide-isomerase A3	PDIA3
6.716	5.02282	P12004	P12004	Proliferating cell nuclear antigen	PCNA
6.716	6.06168	P84077	P84077	ADP-ribosylation factor 1	ARF1
6.71	6.33582	P61956-2;P61956	P61956-2;P61956	Small ubiquitin-related modifier 2	SUMO2
6.706	6.21809	P30050;P30050-2	P30050;P30050-2	60S ribosomal protein L12	RPL12
6.704	4.7449	P46783;Q9NQ39	P46783	40S ribosomal protein S10	RPS10
6.703	6.10613	P32119;A6NIW5;P32119-2	P32119;A6NIW5	Peroxiredoxin-2	PRDX2
6.702	6.1788	P40925;P40925-3;B9A041;P40925-2;B8ZZ51;C9JF79;C9JRL4;C9JLV6;C9IZI0;F8WFC2	P40925;P40925-3;B9A041;P40925-2;B8ZZ51	Malate dehydrogenase, cytoplasmic	MDH1
6.701	5.82198	P78371;P78371-2;F5GWF6;F8VQ14	P78371;P78371-2;F5GWF6;F8VQ14	T-complex protein 1 subunit beta	CCT2
6.699	5.2468	P22234;E9PBS1;P22234-2;D6RF62	P22234;E9PBS1;P22234-2;D6RF62	Multifunctional protein ADE2;Phosphoribosylaminoimidazole-succinocarboxamide synthase;Phosphoribosylaminoimidazole carboxylase	PAICS
6.697	5.70287	P40227;P40227-2	P40227;P40227-2	T-complex protein 1 subunit zeta	CCT6A
6.688	6.03181	P36578;H3BM89;H3BTP7;H3BU31	P36578;H3BM89	60S ribosomal protein L4	RPL4
6.686	4.44334	P43487-2;P43487;F6WQW2;C9JXG8;C9JJ34;C9JGV6;C9JDM3;C9JIC6;Q5T0Z6;Q9C010;Q9C010-2	P43487-2;P43487;F6WQW2;C9JXG8	Ran-specific GTPase-activating protein	RANBP1
6.686	NaN	A0A0U1RRM4;A0A0D9SF20;K7EK45;A0A087WUW5;K7ELW5;K7EKX4	A0A0U1RRM4
6.681	6.37862	P62269;J3JS69;A0A0G2JQH2;Q5GGW2	P62269	40S ribosomal protein S18	RPS18
6.674	6.20699	P08708;H0YN88;A0A075B716;H0YN73;H3BNC9	P08708;H0YN88;A0A075B716	40S ribosomal protein S17	RPS17
6.673	2.84888	P08243;P08243-2;P08243-3;F8WEJ5;C9J057;C9JT45;C9JM09;C9JLN6;C9JLA3;C9J605	P08243;P08243-2;P08243-3;F8WEJ5	Asparagine synthetase [glutamine-hydrolyzing]	ASNS
6.671	6.24811	P62249;M0R210;M0R3H0;M0R1M5;Q6IPX4;M0QX76	P62249;M0R210;M0R3H0;M0R1M5	40S ribosomal protein S16	RPS16
6.67	6.4719	P56279;G3V4T4;H0YJR9	P56279	T-cell leukemia/lymphoma protein 1A	TCL1A
6.665	6.14166	P62750;H7BY10;K7EJV9;K7ERT8;A8MUS3;K7EMA7	P62750;H7BY10;K7EJV9;K7ERT8;A8MUS3	60S ribosomal protein L23a	RPL23A
6.663	3.86488	O43175;Q5SZU1	O43175;Q5SZU1	D-3-phosphoglycerate dehydrogenase	PHGDH
6.662	5.84076	P48643;E7ENZ3;B7ZAR1;E9PCA1;P48643-2;D6RIZ7;H0Y914	P48643;E7ENZ3;B7ZAR1;E9PCA1;P48643-2	T-complex protein 1 subunit epsilon	CCT5
6.658	5.71121	P62942;Q5W0X3;Q1JUQ5;A0A087WZM5;Q5VVH2;Q1JUQ3;A0A087WTS4;A0A087WV48	P62942;Q5W0X3;Q1JUQ5;A0A087WZM5	Peptidyl-prolyl cis-trans isomerase FKBP1A;Peptidyl-prolyl cis-trans isomerase	FKBP1A;FKBP12-Exip2
6.657	5.67143	Q59GN2;P62891	Q59GN2;P62891	Putative 60S ribosomal protein L39-like 5;60S ribosomal protein L39	RPL39P5;RPL39
6.656	5.1267	P16949;P16949-2;A2A2D0;E5RIR6;E7EVN3;Q9H169-3;Q9H169;Q9H169-4;Q9H169-2	P16949;P16949-2;A2A2D0	Stathmin	STMN1
6.654	6.13799	P05141;Q9H0C2	P05141	ADP/ATP translocase 2;ADP/ATP translocase 2, N-terminally processed	SLC25A5
6.654	NaN	P0DOY2;P0DOY3;P0CF74;A0M8Q6	P0DOY2;P0DOY3;P0CF74	Ig lambda-6 chain C region	IGLC6
6.653	6.12386	G8JLB6;P31943;E9PCY7;H0YB39;D6RBM0;H0YBD7;D6RIU0;D6RFM3;D6RIT2;D6RAM1;E5RGV0;D6R9T0;D6RDU3;D6RJ04;D6RIH9;E7EQJ0;E7EN40;H0YBG7;D6RDL0;E5RGH4;H0YAQ2;D6RF17;D6R9D3;E5RJ94	G8JLB6;P31943;E9PCY7;H0YB39;D6RBM0	Heterogeneous nuclear ribonucleoprotein H;Heterogeneous nuclear ribonucleoprotein H, N-terminally processed	HNRNPH1
6.651	6.17839	P46776;E9PLL6;E9PJD9;E9PLX7;E9PKT2;H0YF34	P46776;E9PLL6;E9PJD9;E9PLX7	60S ribosomal protein L27a	RPL27A
6.648	6.23074	P62277;J3KMX5;E9PS50	P62277;J3KMX5	40S ribosomal protein S13	RPS13
6.646	6.0843	X1WI28;P27635;Q96L21;B8A6G2;A6QRI9	X1WI28;P27635;Q96L21	60S ribosomal protein L10;60S ribosomal protein L10-like	RPL10;RPL10L
6.646	6.24735	P62701;Q8TD47;C9JEH7;P22090	P62701	40S ribosomal protein S4, X isoform	RPS4X
6.645	5.05491	F8VY35;F5H4R6;P55209-2;P55209;F8VUX1;F8W0J6;H0YIV4;F8W020;F8VXI6;H0YH88;H0YHC3;F8VVB5	F8VY35;F5H4R6;P55209-2;P55209;F8VUX1;F8W0J6;H0YIV4;F8W020;F8VXI6	Nucleosome assembly protein 1-like 1	NAP1L1
6.645	5.97413	P27348;E9PG15	P27348;E9PG15	14-3-3 protein theta	YWHAQ
6.644	5.8398	P50990;P50990-2;H7C4C8;H7C2U0	P50990;P50990-2	T-complex protein 1 subunit theta	CCT8
6.644	5.94731	Q9Y3U8;J3QSB5;J3KTD3	Q9Y3U8;J3QSB5	60S ribosomal protein L36	RPL36
6.642	6.0334	P14866;M0QXS5;P14866-2;M0R1W6;B4DVF8;M0QYL7;H7C464	P14866;M0QXS5;P14866-2	Heterogeneous nuclear ribonucleoprotein L	HNRNPL
6.641	6.21114	P39687;H0YN26;H7BZ09;O95626;O43423	P39687;H0YN26	Acidic leucine-rich nuclear phosphoprotein 32 family member A	ANP32A
6.64	6.29056	P39019;A0A075B6E2;M0R2L9;M0QXK4;M0QYF7;M0R140	P39019;A0A075B6E2	40S ribosomal protein S19	RPS19
6.638	5.97292	P39023;G5E9G0;H7C422;H7C3M2;B5MCW2;F8WCR1	P39023;G5E9G0;H7C422;H7C3M2;B5MCW2	60S ribosomal protein L3	RPL3
6.631	5.68404	P49368;B4DUR8;P49368-2;E9PRC8;Q5SZX6;Q5SZX9;Q5SZW8;E9PQ35;E9PM09	P49368;B4DUR8;P49368-2	T-complex protein 1 subunit gamma	CCT3
6.628	5.31402	Q15181;Q5SQT6	Q15181;Q5SQT6	Inorganic pyrophosphatase	PPA1
6.628	6.29553	Q99497;K7ELW0;K7EN27	Q99497;K7ELW0;K7EN27	Protein deglycase DJ-1	PARK7
6.627	5.43804	P34897-3;P34897;P34897-2;H0YIZ0;G3V2Y4;G3V5L0;G3V4W5;G3V540;G3V2W0;G3V241;G3V3Y8;G3V4T0;G3V4X0;G3V2E4;G3V2D2;G3V2Y1;G3V3C6	P34897-3;P34897;P34897-2;H0YIZ0	Serine hydroxymethyltransferase, mitochondrial;Serine hydroxymethyltransferase	SHMT2
6.624	5.28197	Q5W0H4;A0A0B4J2C3;P13693;P13693-2;E9PJF7;H0YCX0;Q56UQ5;Q9HAU6	Q5W0H4;A0A0B4J2C3;P13693;P13693-2;E9PJF7	Translationally-controlled tumor protein	TPT1
6.624	6.21744	A0A024R4M0;P46781;B5MCT8;C9JM19;F2Z3C0;A8MXK4	A0A024R4M0;P46781;B5MCT8;C9JM19	40S ribosomal protein S9	RPS9
6.621	6.34372	P62241;Q5JR95	P62241;Q5JR95	40S ribosomal protein S8	RPS8
6.621	4.91839	P33316-2;H0YNJ9;H0YMM5	P33316-2;H0YNJ9;H0YMM5	Deoxyuridine 5-triphosphate nucleotidohydrolase, mitochondrial	DUT
6.614	6.21436	P18124;A8MUD9;C9JIJ5;C9JZ88	P18124;A8MUD9	60S ribosomal protein L7	RPL7
6.613	7.51176	P10412;P22492;Q02539	P10412	Histone H1.4	HIST1H1E
6.613	4.27345	P60660-2;G8JLA2;F8VZU9;F8W180;F8VXL3	P60660-2;G8JLA2;F8VZU9;F8W180	Myosin light polypeptide 6	MYL6
6.611	6.16152	P62829;J3KT29;C9JD32;B9ZVP7;J3KTJ3;J3QQT9	P62829;J3KT29;C9JD32;B9ZVP7	60S ribosomal protein L23	RPL23
6.609	5.91769	P62258;P62258-2;B4DJF2;I3L3T1;K7EIT4;K7EM20;I3L0W5	P62258;P62258-2	14-3-3 protein epsilon	YWHAE
6.608	6.52682	P31946-2;P31946;Q4VY19;A0A0J9YWE8;Q4VY20;A0A0J9YWZ2	P31946-2;P31946	14-3-3 protein beta/alpha;14-3-3 protein beta/alpha, N-terminally processed	YWHAB
6.604	6.25169	P84090;G3V279	P84090;G3V279	Enhancer of rudimentary homolog	ERH
6.604	5.73483	Q07666;Q07666-3;Q07666-2	Q07666;Q07666-3;Q07666-2	KH domain-containing, RNA-binding, signal transduction-associated protein 1	KHDRBS1
6.6	6.19849	P12956;P12956-2;B1AHC9	P12956;P12956-2;B1AHC9	X-ray repair cross-complementing protein 6	XRCC6
6.6	5.65895	Q99832;Q99832-3;Q99832-4;Q99832-2;F8WAM2;F8WBP8;A0A0D9SG95	Q99832;Q99832-3;Q99832-4;Q99832-2	T-complex protein 1 subunit eta	CCT7
6.594	5.6899	P28066;P28066-2	P28066;P28066-2	Proteasome subunit alpha type-5	PSMA5
6.592	5.97445	P21796;C9JI87	P21796;C9JI87	Voltage-dependent anion-selective channel protein 1	VDAC1
6.592	6.03192	Q15233;Q15233-2;H7C367;C9IZL7;C9J4X2	Q15233;Q15233-2;H7C367	Non-POU domain-containing octamer-binding protein	NONO
6.59	5.88342	P63173;J3KT73;J3QL01;J3KSP2	P63173;J3KT73;J3QL01;J3KSP2	60S ribosomal protein L38	RPL38
6.589	5.91343	S4R3N1;B4DM50	S4R3N1		HSPE1-MOB4
6.589	5.73919	P50991;P50991-2	P50991;P50991-2	T-complex protein 1 subunit delta	CCT4
6.588	5.46508	E5RIW3;E5RJD8;O75347;O75347-2	E5RIW3;E5RJD8;O75347;O75347-2	Tubulin-specific chaperone A	TBCA
6.587	6.1512	P62316;P62316-2;K7ERG4;K7EJB5	P62316;P62316-2;K7ERG4	Small nuclear ribonucleoprotein Sm D2	SNRPD2
6.584	NaN	H0YAZ4	H0YAZ4		CNGB3
6.581	6.30609	P62899;C9JU56;B7Z4E3;B7Z4C8;P62899-3;P62899-2;B8ZZK4;H7C2W9	P62899;C9JU56;B7Z4E3;B7Z4C8;P62899-3;P62899-2;B8ZZK4;H7C2W9	60S ribosomal protein L31	RPL31
6.581	5.81702	P17844;J3KTA4;P17844-2;J3KRZ1;J3QRQ7;J3QSF1;J3KRX8;J3QR02;X6RLV5;J3QKN9;J3QRN5;J3QS79;J3QLG9;J3QR62	P17844;J3KTA4;P17844-2	Probable ATP-dependent RNA helicase DDX5	DDX5
6.577	6.4118	Q06323;Q06323-3;Q06323-2;H0YLU2;H0YKK6	Q06323;Q06323-3;Q06323-2	Proteasome activator complex subunit 1	PSME1
6.577	5.71356	P62308;A8MWD9;Q49AN9;F5H013;C9JVQ0	P62308;A8MWD9;Q49AN9;F5H013;C9JVQ0	Small nuclear ribonucleoprotein G;Putative small nuclear ribonucleoprotein G-like protein 15	SNRPG;SNRPGP15
6.57	5.76241	P38646;H0Y8S0;D6RJI2;H0YBG6;D6RA73	P38646	Stress-70 protein, mitochondrial	HSPA9
6.566	6.00629	P30086	P30086	Phosphatidylethanolamine-binding protein 1;Hippocampal cholinergic neurostimulating peptide	PEBP1
6.563	5.59613	P23526;P23526-2	P23526;P23526-2	Adenosylhomocysteinase	AHCY
6.557	6.0278	P62854;Q5JNZ5	P62854;Q5JNZ5	40S ribosomal protein S26;Putative 40S ribosomal protein S26-like 1	RPS26;RPS26P11
6.556	5.96405	P62273;P62273-2;A0A087WTT6	P62273;P62273-2	40S ribosomal protein S29	RPS29
6.555	5.68817	P10599;P10599-2	P10599;P10599-2	Thioredoxin	TXN
6.554	6.0783	H0YMV8;Q71UM5;C9JLI6;C9J1C5	H0YMV8;Q71UM5;C9JLI6	40S ribosomal protein S27;40S ribosomal protein S27-like	RPS27L
6.553	6.01235	P61224;E7ESV4;F5H7Y6;F5GX62;P61224-3;A0A0J9YXB3;A6NIZ1;P61224-4;F5H004;F5H6R7;F5GYB5;P61224-2;F5H0B7;F5H500;F5H077;F5GWU8;F5H491;F5H4H0;F5GYH7;F8WBC0	P61224;E7ESV4;F5H7Y6;F5GX62;P61224-3;A0A0J9YXB3;A6NIZ1;P61224-4;F5H004;F5H6R7	Ras-related protein Rap-1b;Ras-related protein Rap-1b-like protein	RAP1B
6.551	5.86586	P18077;C9K025;F8WBS5;F8WB72	P18077;C9K025;F8WBS5;F8WB72	60S ribosomal protein L35a	RPL35A
6.55	6.03888	P61586;C9JX21;C9JNR4;Q5JR08;P08134;Q5JR07;E9PQH6;Q5JR05;U3KQA9;U3KQV3;C9JRM1;Q5JR06;E9PN11;E9PLA2	P61586;C9JX21;C9JNR4	Transforming protein RhoA	RHOA
6.55	5.84358	P00491;G3V5M2;G3V2H3;G3V393	P00491;G3V5M2	Purine nucleoside phosphorylase	PNP
6.542	5.7568	P05455;E7ERC4;E9PGX9;E9PFL9	P05455;E7ERC4	Lupus La protein	SSB
6.541	4.69902	Q8WU39;Q8WU39-3;H0Y9L3;D6RII0;Q8WU39-5;Q8WU39-4;Q8WU39-2	Q8WU39	Marginal zone B- and B1-cell-specific protein	MZB1
6.538	5.9751	P61313;E7EQV9;E7ENU7;E7EX53;P61313-2;E7ERA2	P61313;E7EQV9;E7ENU7;E7EX53	60S ribosomal protein L15;Ribosomal protein L15	RPL15
6.536	6.26814	O75531;E9PJJ8	O75531	Barrier-to-autointegration factor;Barrier-to-autointegration factor, N-terminally processed	BANF1
6.535	6.25864	P61254;J3QRI7;J3QQQ9;J3QQV1;J3QRC4;J3KTJ8;J3KSS0;J3KS10	P61254;J3QRI7;J3QQQ9;J3QQV1;J3QRC4;J3KTJ8	60S ribosomal protein L26	RPL26
6.532	6.0728	P23246;P23246-2;H0Y9K7;H0Y9U2	P23246;P23246-2	Splicing factor, proline- and glutamine-rich	SFPQ
6.531	6.08811	P42766;F2Z388	P42766	60S ribosomal protein L35	RPL35
6.53	5.8095	K7ELC2;P62841;K7EM56;A0A0B4J2B4;S4R417;K7EQJ5;K7EJ78;S4R456	K7ELC2;P62841;K7EM56;A0A0B4J2B4;S4R417;K7EQJ5;K7EJ78;S4R456	40S ribosomal protein S15	RPS15
6.527	5.86708	Q01130;J3KP15;Q01130-2;J3QL05	Q01130;J3KP15;Q01130-2;J3QL05	Serine/arginine-rich splicing factor 2	SRSF2
6.526	NaN	Q15056	Q15056	Eukaryotic translation initiation factor 4H	EIF4H
6.524	5.93939	P68133;A6NL76	P68133;A6NL76	Actin, alpha skeletal muscle	ACTA1
6.524	5.87303	Q16629-4;Q16629;A0A0B4J1Z1;C9JAB2;Q16629-3;Q16629-2;F8WEA1;H7BZZ6	Q16629-4;Q16629;A0A0B4J1Z1;C9JAB2;Q16629-3;Q16629-2	Serine/arginine-rich splicing factor 7	SRSF7
6.523	5.52253	Q9BTT0;Q5TB19;E9PLC4;Q9BTT0-3;Q9BTT0-2;E9PPH5;E9PI45;Q5TB25	Q9BTT0;Q5TB19;E9PLC4;Q9BTT0-3;Q9BTT0-2	Acidic leucine-rich nuclear phosphoprotein 32 family member E	ANP32E
6.523	5.14243	Q9HB71;Q9HB71-3;Q9HB71-2;B2ZWH1	Q9HB71;Q9HB71-3	Calcyclin-binding protein	CACYBP
6.521	6.17979	P13010;C9JZ81;H7C0H9	P13010	X-ray repair cross-complementing protein 5	XRCC5
6.52	6.09626	P52272;P52272-2;A0A087X0X3;M0R2T0;M0R2I7;M0QY96;M0QYL3	P52272;P52272-2;A0A087X0X3	Heterogeneous nuclear ribonucleoprotein M	HNRNPM
6.517	6.30695	P62280;M0QZC5;M0R1H5;M0R1H6	P62280;M0QZC5	40S ribosomal protein S11	RPS11
6.513	6.14374	P61088;F8VSD4;F8VQQ8;F8VV71;Q5JXB2;F8VZ29	P61088;F8VSD4;F8VQQ8;F8VV71;Q5JXB2	Ubiquitin-conjugating enzyme E2 N;Putative ubiquitin-conjugating enzyme E2 N-like	UBE2N;UBE2NL
6.513	6.07326	P62266;D6RD47;D6RDJ2;D6RIX0;D6R9I7	P62266;D6RD47	40S ribosomal protein S23	RPS23
6.512	6.21181	O00299	O00299	Chloride intracellular channel protein 1	CLIC1
6.509	5.59788	P24534;C9JZW3;F2Z2G2;F8WF65	P24534	Elongation factor 1-beta	EEF1B2
6.506	5.9412	A0A087WXM6;J3QQT2;J3KRX5;A0A0A6YYL6;P18621;P18621-3;J3QLC8;J3KRB3;A0A087WWH0;J3QS96;A0A0A0MRF8;P18621-2;A0A087WY81;J3KSJ0	A0A087WXM6;J3QQT2;J3KRX5;A0A0A6YYL6;P18621;P18621-3;J3QLC8;J3KRB3;A0A087WWH0;J3QS96;A0A0A0MRF8;P18621-2;A0A087WY81	60S ribosomal protein L17	RPL17;RPL17-C18orf32
6.504	6.05109	P62318-2;P62318;H3BT13	P62318-2;P62318;H3BT13	Small nuclear ribonucleoprotein Sm D3	SNRPD3
6.503	6.23101	Q99714;Q5H928	Q99714;Q5H928	3-hydroxyacyl-CoA dehydrogenase type-2	HSD17B10
6.5	5.81209	P98179	P98179	RNA-binding protein 3	RBM3
6.498	5.83428	E7ETK0;A0A087WUS0;P62847-2;P62847-3;P62847;P62847-4	E7ETK0;A0A087WUS0;P62847-2;P62847-3;P62847;P62847-4	40S ribosomal protein S24	RPS24
6.493	6.10954	F8WCF6;P59998;P59998-3;H7C0A3;R4GN08;F8WDD7;A0A0A6YYG9;P59998-4;P59998-2;F8WE39;F8WDW3	F8WCF6;P59998;P59998-3;H7C0A3;R4GN08;F8WDD7;A0A0A6YYG9;P59998-4;P59998-2	Actin-related protein 2/3 complex subunit 4	ARPC4-TTLL3;ARPC4
6.489	4.96474	O00410;O00410-3;H0Y8C6;E7ETV3;E7EQT5;E7EV12;C9JMV5;C9JZD8;E7EWK4;E7EX05;C9JQT6;E7ESA1;E7ESZ1;E7ETV8;C9J875;C9JXE0	O00410;O00410-3;H0Y8C6	Importin-5	IPO5
6.487	5.38069	Q7KZF4;H7C597	Q7KZF4	Staphylococcal nuclease domain-containing protein 1	SND1
6.482	5.89154	P61981	P61981	14-3-3 protein gamma;14-3-3 protein gamma, N-terminally processed	YWHAG
6.48	5.08275	P20290;H0Y9Y1	P20290	Transcription factor BTF3	BTF3
6.48	5.72167	P67809;H0Y449;C9J5V9	P67809;H0Y449;C9J5V9	Nuclease-sensitive element-binding protein 1	YBX1
6.479	5.95521	P61160;P61160-2;F5H6T1;A0A1B0GWD0;A0A1B0GWH0	P61160;P61160-2;F5H6T1	Actin-related protein 2	ACTR2
6.478	6.57762	P20700;E9PBF6;A0A0D9SFE5;A0A0D9SFY5;A0A0C4DGC5;Q3BDU5;Q5TCI8;P02545-5;P02545-2;P02545-4;P02545-6;P02545-3;P02545	P20700;E9PBF6;A0A0D9SFE5	Lamin-B1	LMNB1
6.475	6.10229	P30044;P30044-2;P30044-3;P30044-4	P30044;P30044-2;P30044-3;P30044-4	Peroxiredoxin-5, mitochondrial	PRDX5
6.473	5.96204	P62753;A2A3R5;A2A3R7	P62753;A2A3R5	40S ribosomal protein S6	RPS6
6.472	5.55118	P11940;E7ERJ7;E7EQV3;P11940-2;A0A087WTT1;H0YBN4;H0YB86;E5RJB9;E5RH24;E5RGH3;H0YAP2;H0YAS6;H0YB75;Q4VXU2;H0YAW6;H0YAS7;E5RHG7;Q4VXU2-2;H0YC10;E5RFD8;E5RGC4;E5RJM8;Q96DU9-2;Q96DU9	P11940;E7ERJ7;E7EQV3;P11940-2;A0A087WTT1	Polyadenylate-binding protein 1;Polyadenylate-binding protein	PABPC1
6.471	6.3013	P35232;C9JW96;E7ESE2;E9PCW0;C9JZ20;P35232-2;D6RBK0	P35232;C9JW96;E7ESE2;E9PCW0;C9JZ20	Prohibitin	PHB
6.47	4.75121	P60953;Q5JYX0	P60953;Q5JYX0	Cell division control protein 42 homolog	CDC42
6.47	6.09355	J3KTL2;Q07955;Q07955-3;Q07955-2;J3KSR8;J3QQV5;J3KSW7	J3KTL2;Q07955;Q07955-3;Q07955-2;J3KSR8	Serine/arginine-rich splicing factor 1	SRSF1
6.468	5.93482	P40429;M0QYS1;Q8J015;Q6NVV1;M0QZU1;A0A096LPE0	P40429;M0QYS1;Q8J015	60S ribosomal protein L13a	RPL13A;RPL13a
6.465	5.28285	P12268;H0Y4R1;E7ETK5	P12268;H0Y4R1;E7ETK5	Inosine-5-monophosphate dehydrogenase 2	IMPDH2
6.464	3.69661	Q9Y617;Q9Y617-2	Q9Y617;Q9Y617-2	Phosphoserine aminotransferase	PSAT1
6.461	5.9067	P63279;H3BQQ9;B0QYN7;H3BPC4	P63279;H3BQQ9;B0QYN7;H3BPC4	SUMO-conjugating enzyme UBC9	UBE2I
6.461	6.02342	P62906	P62906	60S ribosomal protein L10a	RPL10A
6.461	7.40217	Q71DI3	Q71DI3	Histone H3.2	HIST2H3A
6.458	5.54205	Q04837;A0A0G2JLD8;E7EUY5;C9K0U8	Q04837;A0A0G2JLD8;E7EUY5;C9K0U8	Single-stranded DNA-binding protein, mitochondrial	SSBP1
6.457	5.63166	K7EM18;P41567	K7EM18;P41567	Eukaryotic translation initiation factor 1	EIF1
6.456	5.70411	P62304;A6NHK2	P62304;A6NHK2	Small nuclear ribonucleoprotein E	SNRPE
6.454	4.83549	P62424;Q5T8U3;Q5T8U2	P62424;Q5T8U3;Q5T8U2	60S ribosomal protein L7a	RPL7A
6.45	5.10486	P68036;P68036-3;P68036-2;A0A1B0GUS4	P68036;P68036-3;P68036-2	Ubiquitin-conjugating enzyme E2 L3	UBE2L3
6.449	5.66425	P26641;P26641-2	P26641;P26641-2	Elongation factor 1-gamma	EEF1G
6.448	5.58962	P07237;H7BZ94;H0Y3Z3;I3L398;I3L312;I3L0S0;I3NI03;I3L4M2;I3L3U6;I3L3P5;I3L514;I3L1Y5	P07237;H7BZ94;H0Y3Z3	Protein disulfide-isomerase	P4HB
6.447	6.09045	A0A087X1Z3;Q9UL46;H0YKU2;H0YLG1;H0YLD2	A0A087X1Z3;Q9UL46	Proteasome activator complex subunit 2	PSME2
6.447	6.10087	P58546;C9JL85	P58546	Myotrophin	MTPN
6.447	5.65178	Q92688-2;Q92688	Q92688-2;Q92688	Acidic leucine-rich nuclear phosphoprotein 32 family member B	ANP32B
6.446	6.1984	Q07020;G3V203;J3QQ67;H0YHA7;Q07020-2;F8VYV2;A0A075B7A0;F8VUA6;F8VXR6	Q07020;G3V203;J3QQ67;H0YHA7;Q07020-2;F8VYV2;A0A075B7A0;F8VUA6	60S ribosomal protein L18	RPL18
6.441	6.25735	P35579;P35579-2;Q5BKV1;B1AH99;A0A0C4DFM8;A1L2Z2;REV__S4R3H4;REV__E7EQT4;REV__Q9UKV3-5;REV__Q9UKV3;P12883;Q9UKX3;Q9Y623;P13533;P11055	P35579;P35579-2	Myosin-9	MYH9
6.439	5.84343	P55327-2;P55327-4;P55327-3;P55327;P55327-5;P55327-6;E5RFR7;E5RK35	P55327-2;P55327-4;P55327-3;P55327;P55327-5;P55327-6	Tumor protein D52	TPD52
6.439	5.73636	Q12905;B4DY09;A0A0A0MRL0;X6R6Z1	Q12905;B4DY09	Interleukin enhancer-binding factor 2	ILF2
6.439	5.95521	E9PR30;P62861	E9PR30;P62861	40S ribosomal protein S30	FAU
6.438	5.57717	Q8NBS9;Q8NBS9-2	Q8NBS9;Q8NBS9-2	Thioredoxin domain-containing protein 5	TXNDC5
6.437	6.19901	P61158;B4DXW1;F8WDR7;F8WEW2;F8WE84	P61158;B4DXW1	Actin-related protein 3	ACTR3
6.435	6.28987	P27695;G3V3M6;G3V5Q1;A0A0C4DGK8;G3V3C7;H7C4A8;G3V359;G3V5M0;G3V5D9;G3V3Y6	P27695;G3V3M6;G3V5Q1;A0A0C4DGK8;G3V3C7;H7C4A8	DNA-(apurinic or apyrimidinic site) lyase;DNA-(apurinic or apyrimidinic site) lyase, mitochondrial	APEX1
6.43	6.15643	P49458;E9PE20;P49458-2	P49458;E9PE20;P49458-2	Signal recognition particle 9 kDa protein	SRP9
6.429	5.93451	P52597;A0A1B0GW42	P52597	Heterogeneous nuclear ribonucleoprotein F;Heterogeneous nuclear ribonucleoprotein F, N-terminally processed	HNRNPF
6.428	5.71656	P61970;H3BRV9	P61970;H3BRV9	Nuclear transport factor 2	NUTF2
6.425	5.14977	Q9UII2;A0A0B4J230;Q9UII2-3;Q9UII2-2	Q9UII2;A0A0B4J230;Q9UII2-3;Q9UII2-2	ATPase inhibitor, mitochondrial	ATPIF1
6.425	5.89079	P30041	P30041	Peroxiredoxin-6	PRDX6
6.425	6.22163	P26373;J3QSB4;P26373-2;H3BTH3;H3BUK8;J3KS98	P26373;J3QSB4;P26373-2	60S ribosomal protein L13	RPL13
6.423	6.02767	D3YTB1;F8W727;P62910;D3YTI8	D3YTB1;F8W727;P62910	60S ribosomal protein L32	RPL32
6.419	5.58821	D6R9P3;D6RD18;D6RBZ0;Q99729-3;Q99729-2	D6R9P3;D6RD18;D6RBZ0;Q99729-3;Q99729-2	Heterogeneous nuclear ribonucleoprotein A/B	HNRNPAB
6.412	5.52031	O14818;O14818-2;H0Y586;O14818-4;F5GY34	O14818;O14818-2;H0Y586;O14818-4	Proteasome subunit alpha type-7	PSMA7
6.412	5.94117	P62820;E7END7;P62820-2;P62820-3	P62820;E7END7;P62820-2;P62820-3	Ras-related protein Rab-1A	RAB1A
6.411	5.90073	P22087;M0QXL5;M0R2Q4;M0R0P1;M0R2U2;M0R1H0;M0R2B0	P22087;M0QXL5;M0R2Q4;M0R0P1	rRNA 2-O-methyltransferase fibrillarin	FBL
6.411	5.0931	E9PC52;Q5JP02;C9J7L0;Q5JNZ6	E9PC52		RBBP7
6.41	5.12975	P39748;P39748-2;I3L3E9;F5H1Y3	P39748;P39748-2;I3L3E9	Flap endonuclease 1	FEN1
6.41	6.10156	P52907	P52907	F-actin-capping protein subunit alpha-1	CAPZA1
6.408	5.64848	P38919;I3L3H2	P38919	Eukaryotic initiation factor 4A-III;Eukaryotic initiation factor 4A-III, N-terminally processed	EIF4A3
6.408	5.9494	P62913-2;P62913;Q5VVC8;Q5VVC9	P62913-2;P62913;Q5VVC8;Q5VVC9	60S ribosomal protein L11	RPL11
6.404	5.98024	J3QR09;J3KTE4;P84098;J3QL15	J3QR09;J3KTE4;P84098	Ribosomal protein L19;60S ribosomal protein L19	RPL19
6.404	6.07926	P49411;H3BNU3	P49411	Elongation factor Tu, mitochondrial	TUFM
6.403	5.37335	P50502;Q3KNR6;H7C3I1;F6VDH7;Q8IZP2;Q8NFI4;F8WAQ7	P50502;Q3KNR6;H7C3I1;F6VDH7;Q8IZP2	Hsc70-interacting protein;Putative protein FAM10A4	ST13;ST13P4
6.403	5.71302	P62995;P62995-3;H7BXF3;H7C2L4	P62995;P62995-3;H7BXF3	Transformer-2 protein homolog beta	TRA2B
6.402	6.06555	P62917;E9PKZ0;E9PKU4;G3V1A1;E9PP36	P62917;E9PKZ0;E9PKU4;G3V1A1	60S ribosomal protein L8	RPL8
6.4	5.90984	F8W1A4;P54819-2;P54819;F8VY04;P54819-6;P54819-5;P54819-3;P54819-4;F8VZG5;G3V213;F8VPP1	F8W1A4;P54819-2;P54819;F8VY04;P54819-6;P54819-5;P54819-3;P54819-4;F8VZG5	Adenylate kinase 2, mitochondrial;Adenylate kinase 2, mitochondrial;Adenylate kinase 2, mitochondrial, N-terminally processed	AK2
6.397	5.84711	B4DJV2;O75390;A0A0C4DGI3;F8VRI6;F8VPA1;H0YH82;H0YIC4;F8VPF9;F8W1S4;F8VRP1;F8VX68;F8W4S1;F8VZK9;F8VX07;F8VTT8;F8VWQ5;F8VR34;F8W642;F8VU34;F8W0J2	B4DJV2;O75390;A0A0C4DGI3	Citrate synthase;Citrate synthase, mitochondrial	CS
6.395	5.66453	P63167;F8VXL2;F8VRV5;F8VXI7	P63167;F8VXL2;F8VRV5	Dynein light chain 1, cytoplasmic	DYNLL1
6.394	5.15238	Q7L2H7;Q7L2H7-2;J3KNJ2;H0YCQ8;E9PN86;E7ESM3;E9PRY0;E9PRI2	Q7L2H7;Q7L2H7-2;J3KNJ2	Eukaryotic translation initiation factor 3 subunit M	EIF3M
6.39	5.38873	P23381;P23381-2;G3V3H8;G3V3Y5;G3V277;G3V423;G3V5U1;G3V456;G3V3P2;G3V227;H0YJP3;G3V3X0;G3V2Y7;G3V3S7;G3V4C7;G3V4N8;G3V5W1;G3V2F2;G3V3R3;G3V4S4;G3V313;G3V339;G3V2C0;G3V5H5;P78534;G3V4A3;G3V4Q0;G3V4N0	P23381;P23381-2;G3V3H8;G3V3Y5	Tryptophan--tRNA ligase, cytoplasmic;T1-TrpRS;T2-TrpRS	WARS
6.39	5.40372	Q96AZ6;H0YMM4;H3BLY5;Q96AZ6-2	Q96AZ6;H0YMM4	Interferon-stimulated gene 20 kDa protein	ISG20
6.39	6.12475	P20674;H3BNX8;H3BRM5;H3BV69;H3BRI0	P20674;H3BNX8;H3BRM5;H3BV69	Cytochrome c oxidase subunit 5A, mitochondrial	COX5A
6.389	5.56183	P30046;B5MC82;P30046-2;A6NHG4;J3KQ18;H7C342	P30046;B5MC82;P30046-2;A6NHG4;J3KQ18	D-dopachrome decarboxylase;D-dopachrome decarboxylase-like protein	DDT;DDTL
6.386	6.36341	Q02878;F8VZ45;U3KQR5;F8VR69;F8VZA3;F8VWR1;F8VU16	Q02878	60S ribosomal protein L6	RPL6
6.385	5.76112	P31948;P31948-2;P31948-3;F5H783;F5GXD8;H0YGI8	P31948;P31948-2;P31948-3	Stress-induced-phosphoprotein 1	STIP1
6.385	5.87761	A0A087WYT3;Q15185-4;Q15185;Q15185-3;B4DDC6;Q15185-2	A0A087WYT3;Q15185-4;Q15185;Q15185-3;B4DDC6	Prostaglandin E synthase 3	PTGES3
6.381	5.67179	P31939;P31939-2;H7C1S2;C9JLK0;F8WEF0	P31939;P31939-2	Bifunctional purine biosynthesis protein PURH;Phosphoribosylaminoimidazolecarboxamide formyltransferase;IMP cyclohydrolase	ATIC
6.38	3.15837	A8MXP9;Q68E03	A8MXP9		MATR3
6.38	5.90466	Q9UKM9;Q5QPM1;Q5QPM0	Q9UKM9;Q5QPM1;Q5QPM0	RNA-binding protein Raly	RALY
6.38	5.54823	Q09028-3;Q09028;E9PNS6;E9PNS2;E9PIC4	Q09028-3;Q09028	Histone-binding protein RBBP4	RBBP4
6.378	6.21376	P37837;F2Z393;E9PM01;E9PKI8	P37837;F2Z393	Transaldolase	TALDO1
6.378	5.46567	P14868;P14868-2;H7BZ35;C9J7S3;C9JLC1;H7C278;C9JQM9	P14868;P14868-2	Aspartate--tRNA ligase, cytoplasmic	DARS
6.374	6.1003	O15144;H7C3F9;C9JTV5;G5E9J0;G5E9S7	O15144	Actin-related protein 2/3 complex subunit 2	ARPC2
6.373	4.54918	P54709;P54709-2;C9JA36;C9JXZ1;H7C4L9;H7C547;F8WBY4;C9J6S2	P54709;P54709-2;C9JA36;C9JXZ1	Sodium/potassium-transporting ATPase subunit beta-3	ATP1B3
6.373	5.63865	P00505;P00505-2	P00505;P00505-2	Aspartate aminotransferase, mitochondrial	GOT2
6.371	6.33251	P55769;B1AHD1	P55769;B1AHD1	NHP2-like protein 1;NHP2-like protein 1, N-terminally processed	NHP2L1
6.371	4.93994	P06331;A0A0J9YWU9;P0DP08;P0DP06;A0A0C4DH41;P01825;P01824	P06331;A0A0J9YWU9;P0DP08;P0DP06;A0A0C4DH41;P01825;P01824	Ig heavy chain V-II region ARH-77;Ig heavy chain V-II region NEWM;Ig heavy chain V-II region WAH	IGHV4-61
6.37	5.86371	O43390;O43390-3;B4DT28	O43390;O43390-3;B4DT28	Heterogeneous nuclear ribonucleoprotein R	HNRNPR
6.369	5.2996	Q99873-4;E9PKG1;H7C2I1;Q99873-3;Q99873-2;Q99873;E9PIX6;E9PQ98;A0A087X1W2;H0YDE4;E9PNR9;E9PMW9;E9PMZ2	Q99873-4;E9PKG1;H7C2I1;Q99873-3;Q99873-2;Q99873;E9PIX6;E9PQ98;A0A087X1W2;H0YDE4	Protein arginine N-methyltransferase 1	PRMT1
6.367	6.04354	P04080;A0A1W2PQG6;A0A1W2PS52	P04080;A0A1W2PQG6	Cystatin-B	CSTB
6.367	5.91317	P45880;A0A0A0MR02;P45880-2;P45880-1;Q5JSD2;Q5JSD1;A2A3S1	P45880;A0A0A0MR02;P45880-2;P45880-1;Q5JSD2;Q5JSD1	Voltage-dependent anion-selective channel protein 2	VDAC2
6.367	6.07006	Q99623;J3KPX7;F5GY37;Q99623-2;F5GWA7;F5H3X6;F5H0C5;F5H2D2;U3KPZ5	Q99623;J3KPX7;F5GY37;Q99623-2;F5GWA7;F5H3X6	Prohibitin-2	PHB2
6.367	6.21976	P37108;H0YLA2	P37108;H0YLA2	Signal recognition particle 14 kDa protein	SRP14
6.366	5.91938	P47914;F8WF43	P47914	60S ribosomal protein L29	RPL29
6.36	3.31635	O14950	O14950	Myosin regulatory light chain 12B	MYL12B
6.359	4.16706	P49327;A0A0U1RQF0;A0A0U1RRG3;A0A1B0GTR5;J3KTF0	P49327;A0A0U1RQF0	Fatty acid synthase;[Acyl-carrier-protein] S-acetyltransferase;[Acyl-carrier-protein] S-malonyltransferase;3-oxoacyl-[acyl-carrier-protein] synthase;3-oxoacyl-[acyl-carrier-protein] reductase;3-hydroxyacyl-[acyl-carrier-protein] dehydratase;Enoyl-[acyl-carrier-protein] reductase;Oleoyl-[acyl-carrier-protein] hydrolase	FASN
6.358	5.37788	P49720;A0A087WXQ8;A0A087WY10;A0A087WUL2	P49720;A0A087WXQ8;A0A087WY10;A0A087WUL2	Proteasome subunit beta type-3	PSMB3
6.357	6.47083	Q5TEC6	Q5TEC6	Histone H3	HIST2H3PS2
6.356	5.10782	O95433;O95433-2;G3V438;H0YJG7;H0YJU2;G3V3W9;H0YJ63	O95433;O95433-2;G3V438;H0YJG7	Activator of 90 kDa heat shock protein ATPase homolog 1	AHSA1
6.355	6.05719	M0R0F0;P46782;M0R0R2;M0QZN2	M0R0F0;P46782;M0R0R2;M0QZN2	40S ribosomal protein S5;40S ribosomal protein S5, N-terminally processed	RPS5
6.355	5.64967	P25789;H0YN18;H0YL69;H0YMZ1;H0YMA1;P25789-2;H0YMI6;H0YLC2;H0YLS6	P25789;H0YN18;H0YL69;H0YMZ1;H0YMA1;P25789-2;H0YMI6;H0YLC2	Proteasome subunit alpha type-4;Proteasome subunit alpha type	PSMA4
6.35	5.93079	O75964;E9PN17	O75964;E9PN17	ATP synthase subunit g, mitochondrial	ATP5L
6.349	5.52088	Q96A72;F5H6N1;F5H124	Q96A72;F5H6N1	Protein mago nashi homolog 2	MAGOHB
6.348	5.80422	P55060;P55060-3;P55060-4;P55060-2	P55060;P55060-3;P55060-4	Exportin-2	CSE1L
6.348	6.20747	P15153;B1AH77;B1AH80;B1AH78;B1AH79;G3V4H1;G3V476;Q9H4E5-2;Q9H4E5	P15153;B1AH77;B1AH80;B1AH78	Ras-related C3 botulinum toxin substrate 2	RAC2
6.347	6.05107	P48047;H7C068	P48047	ATP synthase subunit O, mitochondrial	ATP5O
6.344	6.0635	C9JFR7;P99999	C9JFR7;P99999	Cytochrome c	CYCS
6.341	5.38893	A0A024RA52;P25787;C9JCK5;H3BT36;H7C402	A0A024RA52;P25787;C9JCK5	Proteasome subunit alpha type;Proteasome subunit alpha type-2	PSMA2
6.34	4.95704	P62140;E7ETD8;C9JP48;C9J9S3	P62140;E7ETD8	Serine/threonine-protein phosphatase PP1-beta catalytic subunit;Serine/threonine-protein phosphatase	PPP1CB
6.338	4.90386	P15374;A0A087WTB8;Q5TBK7	P15374;A0A087WTB8;Q5TBK7	Ubiquitin carboxyl-terminal hydrolase isozyme L3;Ubiquitin carboxyl-terminal hydrolase	UCHL3
6.334	5.88639	P56385	P56385	ATP synthase subunit e, mitochondrial	ATP5I
6.331	6.17745	P38159;P38159-2;H3BUY5;H3BT71;H0Y6E7;H3BR27;P38159-3;O75526;H3BNC1;Q8N7X1	P38159;P38159-2;H3BUY5;H3BT71;H0Y6E7	RNA-binding motif protein, X chromosome;RNA-binding motif protein, X chromosome, N-terminally processed	RBMX
6.328	5.76431	Q12906-7;Q12906-4;Q12906-6	Q12906-7;Q12906-4;Q12906-6	Interleukin enhancer-binding factor 3	ILF3
6.323	6.05605	P62306;A0A0B4J254;F8W0W6	P62306;A0A0B4J254;F8W0W6	Small nuclear ribonucleoprotein F	SNRPF
6.321	4.19349	O60664-4;O60664;K7ERZ3;O60664-2;K7EL96;K7ER39;K7EJD0	O60664-4;O60664;K7ERZ3;O60664-2	Perilipin-3	PLIN3
6.321	5.97439	P55072;C9JUP7;C9IZA5	P55072	Transitional endoplasmic reticulum ATPase	VCP
6.319	5.74971	O60234;M0QYJ8;M0R0C1;M0QYG8;M0R1D2;M0QXC2;M0QX47;M0QXZ6;M0R2P2	O60234;M0QYJ8;M0R0C1;M0QYG8;M0R1D2;M0QXC2	Glia maturation factor gamma	GMFG
6.318	6.15181	P09874;Q5VX84;Q5VX85	P09874	Poly [ADP-ribose] polymerase 1	PARP1
6.317	6.17069	P07741;P07741-2;H3BQB1;H3BQF1;H3BQZ9;H3BSW3	P07741;P07741-2;H3BQB1;H3BQF1;H3BQZ9	Adenine phosphoribosyltransferase	APRT
6.316	4.7343	P61289;P61289-2;K9J957;P61289-3;A0A087WTV2;K7ENH2;K7ESG5;B3KQ25;B7Z8D3;K7EPX6;K7EKR3;K7EMD0	P61289;P61289-2;K9J957;P61289-3;A0A087WTV2;K7ENH2;K7ESG5;B3KQ25	Proteasome activator complex subunit 3	PSME3
6.316	6.78824	P16401	P16401	Histone H1.5	HIST1H1B
6.315	5.53008	P25788-2;P25788;G3V4X5;H0YJ03;G3V3W4;G3V5N4	P25788-2;P25788;G3V4X5	Proteasome subunit alpha type-3	PSMA3
6.314	5.37714	P05198;G3V4T5;H0YJS4	P05198;G3V4T5;H0YJS4	Eukaryotic translation initiation factor 2 subunit 1	EIF2S1
6.314	6.4165	P61769;H0YLF3;F5H6I0	P61769;H0YLF3;F5H6I0	Beta-2-microglobulin;Beta-2-microglobulin form pI 5.3	B2M
6.311	5.47705	P45973;F8VNY3	P45973;F8VNY3	Chromobox protein homolog 5	CBX5
6.309	5.15189	Q13283;E5RIZ6;E5RH42;E5RJU8;Q13283-2;E5RIF8;E5RI46;E5RH00	Q13283	Ras GTPase-activating protein-binding protein 1	G3BP1
6.307	5.76897	Q14974;Q14974-2;J3KTM9;J3QR48;J3QKQ5;J3QRG4	Q14974;Q14974-2;J3KTM9	Importin subunit beta-1	KPNB1
6.307	4.15587	Q71U36;Q71U36-2;Q13748;Q13748-2;F8VQQ4;Q6PEY2	Q71U36;Q71U36-2;Q13748;Q13748-2	Tubulin alpha-1A chain;Tubulin alpha-3C/D chain	TUBA1A;TUBA3C
6.307	6.26945	O15145;C9JZD1;F8VR50	O15145	Actin-related protein 2/3 complex subunit 3	ARPC3
6.305	6.01638	O75947;O75947-2;F5H608	O75947;O75947-2	ATP synthase subunit d, mitochondrial	ATP5H
6.305	4.1352	P02786;G3V0E5;H7C3V5;F8WBE5	P02786;G3V0E5	Transferrin receptor protein 1;Transferrin receptor protein 1, serum form	TFRC
6.305	5.71875	Q08211;Q08211-2;REV__H0YA90;REV__Q7Z6J0-3	Q08211	ATP-dependent RNA helicase A	DHX9
6.305	5.31341	P41091;Q2VIR3;H7BZU1	P41091;Q2VIR3	Eukaryotic translation initiation factor 2 subunit 3;Putative eukaryotic translation initiation factor 2 subunit 3-like protein	EIF2S3;EIF2S3L
6.303	5.79283	P61513;C9J4Z3;Q6P4E4;E9PEL3;G5E9R3;M0R0A1;M0R2L6;A6NKH3	P61513;C9J4Z3;Q6P4E4;E9PEL3;G5E9R3;M0R0A1;M0R2L6	60S ribosomal protein L37a	RPL37A
6.301	5.13316	O00303;H0YDT6;E9PQV8;A0A1W2PP79	O00303	Eukaryotic translation initiation factor 3 subunit F	EIF3F
6.297	5.77734	P18859;P18859-2;A8MUH2	P18859;P18859-2	ATP synthase-coupling factor 6, mitochondrial	ATP5J
6.296	5.30836	K7EQ55;K7EK33;Q96EP5;Q96EP5-2;K7EQ02	K7EQ55;K7EK33;Q96EP5;Q96EP5-2;K7EQ02	DAZ-associated protein 1	DAZAP1
6.295	5.83194	O43707;O43707-2;F5GXS2;O43707-3;H7C144;P12814-2;P12814;P12814-3;P12814-4;H9KV75;P35609-2;P35609;G3V2N5;G3V2W4;F6THM6;H7C5W8;G3V2X9;H0YJW3;K7EP19;G3V5M4;H0YJ11;G3V2E8	O43707;O43707-2	Alpha-actinin-4	ACTN4
6.295	4.67529	Q7L513;Q7L513-2;Q7L513-9;Q7L513-10;Q7L513-5;Q7L513-4;Q7L513-14;Q7L513-11;Q7L513-8;Q5VXA5;Q7L513-6;Q7L513-13;Q7L513-7;Q7L513-15	Q7L513;Q7L513-2;Q7L513-9;Q7L513-10;Q7L513-5;Q7L513-4;Q7L513-14;Q7L513-11;Q7L513-8	Fc receptor-like A	FCRLA
6.294	5.23416	D6RAH7;H9KV45;A0A087WY85;P61077;P61077-3;P61077-2;D6RFM0;A0A0A0MQU3;P62837-2;P62837;D6RAW0	D6RAH7;H9KV45;A0A087WY85;P61077;P61077-3;P61077-2;D6RFM0;A0A0A0MQU3;P62837-2;P62837	Ubiquitin-conjugating enzyme E2 D3;Ubiquitin-conjugating enzyme E2 D2	UBE2D3;UBE2D2
6.293	5.38681	O60506;O60506-2;F6UXX1	O60506;O60506-2	Heterogeneous nuclear ribonucleoprotein Q	SYNCRIP
6.29	5.49622	Q99733;Q99733-2;C9J6D1;E9PS34;E9PNJ7;A8MXH2;E9PNW0;E9PJJ2;E9PP22;E9PKI2;H0YCI4	Q99733;Q99733-2;C9J6D1;E9PS34;E9PNJ7;A8MXH2;E9PNW0;E9PJJ2	Nucleosome assembly protein 1-like 4	NAP1L4
6.289	4.79543	O43776;K7EIU7;O43776-2;K7EPK2;K7EJ19;K7EQ35;K7EMQ6	O43776	Asparagine--tRNA ligase, cytoplasmic	NARS
6.289	5.92075	P36542	P36542	ATP synthase subunit gamma, mitochondrial	ATP5C1
6.288	5.65583	P09661;H0YKK0;H0YMA0;H0YLR3	P09661;H0YKK0	U2 small nuclear ribonucleoprotein A	SNRPA1
6.287	5.36285	P13667;C9JMN9	P13667	Protein disulfide-isomerase A4	PDIA4
6.287	5.55252	P20618	P20618	Proteasome subunit beta type-1	PSMB1
6.284	3.14507	Q01581;D6RIW1;P54868-3;P54868-2;P54868	Q01581	Hydroxymethylglutaryl-CoA synthase, cytoplasmic	HMGCS1
6.283	2.98159	P06493;A0A024QZP7;A0A087WZZ9;E5RIU6;P06493-2	P06493;A0A024QZP7;A0A087WZZ9;E5RIU6;P06493-2	Cyclin-dependent kinase 1	CDK1;CDC2
6.283	5.57493	P26368-2;P26368;K7ENG2	P26368-2;P26368;K7ENG2	Splicing factor U2AF 65 kDa subunit	U2AF2
6.283	5.37551	P35637-2;P35637	P35637-2;P35637	RNA-binding protein FUS	FUS
6.281	4.97906	P31153;P31153-2;Q00266	P31153;P31153-2	S-adenosylmethionine synthase isoform type-2	MAT2A
6.281	4.53205	P22314;P22314-2;Q5JRR6;Q5JRR9;Q5JRS0;Q5JRS2;Q5JRS1;Q5JRS3	P22314;P22314-2	Ubiquitin-like modifier-activating enzyme 1	UBA1
6.28	5.84179	Q15907;Q15907-2;M0R2D0	Q15907;Q15907-2	Ras-related protein Rab-11B	RAB11B
6.279	5.61143	Q9Y5S9;A0A0J9YW13	Q9Y5S9;A0A0J9YW13	RNA-binding protein 8A	RBM8A
6.276	5.71036	P62879;E7EP32;C9JXA5;C9JIS1;P62879-2;C9JZN1	P62879;E7EP32;C9JXA5;C9JIS1;P62879-2;C9JZN1	Guanine nucleotide-binding protein G(I)/G(S)/G(T) subunit beta-2	GNB2
6.274	5.32974	E5RHG8;Q15369;Q15369-2;R4GMY8	E5RHG8;Q15369;Q15369-2;R4GMY8	Transcription elongation factor B polypeptide 1	TCEB1
6.272	5.19998	P49321;P49321-3;P49321-2;Q5T624;E9PI86;H0YF33;H0YDS9;E9PAU3;E9PJQ2	P49321;P49321-3;P49321-2;Q5T624	Nuclear autoantigenic sperm protein	NASP
6.271	4.80636	P14324;P14324-2;A0A087WVN4;A0A087X090;A0A087X1D8;A0A087WTP2	P14324;P14324-2;A0A087WVN4;A0A087X090	Farnesyl pyrophosphate synthase	FDPS
6.267	6.06903	P13073;H3BN72;H3BNV9;H3BPG0;Q86WV2;H3BNI5	P13073;H3BN72;H3BNV9;H3BPG0;Q86WV2	Cytochrome c oxidase subunit 4 isoform 1, mitochondrial	COX4I1
6.263	5.3948	Q15084-3;Q15084;Q15084-4;Q15084-5;Q15084-2	Q15084-3;Q15084;Q15084-4;Q15084-5;Q15084-2	Protein disulfide-isomerase A6	PDIA6
6.262	5.03913	Q16543;K7EQA9;K7EIU0	Q16543;K7EQA9	Hsp90 co-chaperone Cdc37;Hsp90 co-chaperone Cdc37, N-terminally processed	CDC37
6.26	5.69029	P78417;Q5TA02;P78417-3;P78417-2;Q5TA01	P78417;Q5TA02;P78417-3;P78417-2;Q5TA01	Glutathione S-transferase omega-1	GSTO1
6.258	5.31615	D6RFG8;P27707;D6RCP9;D6RG38	D6RFG8;P27707;D6RCP9	Deoxycytidine kinase	DCK
6.257	5.52367	P09012;M0R268;M0R221;M0R2B8;M0QZG7;M0QXK2;M0R0G9	P09012;M0R268;M0R221;M0R2B8;M0QZG7;M0QXK2	U1 small nuclear ribonucleoprotein A	SNRPA
6.257	6.06655	Q13151	Q13151	Heterogeneous nuclear ribonucleoprotein A0	HNRNPA0
6.254	4.56528	P84101-4;P84101;F8WBN3;B9A031;C9JQZ0;B8ZZY7;F8WBV6;P84101-3;P84101-2	P84101-4;P84101;F8WBN3;B9A031;C9JQZ0;B8ZZY7;F8WBV6;P84101-3;P84101-2	Small EDRK-rich factor 2	SERF2
6.252	4.92862	E7EMN6;P41236;E7EUI7;G1AUC5;Q6NXS1	E7EMN6;P41236;E7EUI7	Protein phosphatase inhibitor 2	PPP1R2
6.252	5.70009	A0A087WVQ6;Q00610-2;Q00610;J3KS13;K7EJJ5;J3KRF5;J3KSQ2;J3QL20;F5H5N6;A0A087WV74;A0A087WXH4	A0A087WVQ6;Q00610-2;Q00610	Clathrin heavy chain;Clathrin heavy chain 1	CLTC
6.251	5.35934	Q9H3K6;A0A087WZT3;Q9H3K6-2;H3BV85;H3BTW0;A0A0B4J295	Q9H3K6;A0A087WZT3;Q9H3K6-2	BolA-like protein 2	BOLA2
6.245	5.5823	Q9UMS4;F5GY56;F5H2I0;H0YGZ5;H0YGF3	Q9UMS4	Pre-mRNA-processing factor 19	PRPF19
6.244	5.63053	P30153;B3KQV6;E9PH38;M0QXG4;M0R0K6	P30153;B3KQV6	Serine/threonine-protein phosphatase 2A 65 kDa regulatory subunit A alpha isoform	PPP2R1A
6.242	5.72652	Q86V81	Q86V81	THO complex subunit 4	ALYREF
6.24	5.37619	Q5T4U5;P11310;P11310-2;B7Z9I1;E9PJM9;E9PRX4;H0YDT5	Q5T4U5;P11310;P11310-2;B7Z9I1	Medium-chain specific acyl-CoA dehydrogenase, mitochondrial	ACADM
6.238	5.82958	P60900;G3V5Z7;G3V295;P60900-2;G3V3I1;P60900-3;G3V3U4;G3V4S5;G3V2S7;H0YJC4	P60900;G3V5Z7;G3V295;P60900-2;G3V3I1;P60900-3	Proteasome subunit alpha type-6;Proteasome subunit alpha type	PSMA6
6.237	5.08556	A6NF51;F8VVW8	A6NF51;F8VVW8		BPNT1
6.236	5.69345	A0A0G2JMH6;P01903;Q30118;A0A0G2JH46;A0A140TA34;P01906	A0A0G2JMH6;P01903;Q30118;A0A0G2JH46	HLA class II histocompatibility antigen, DR alpha chain	HLA-DRA
6.234	5.10228	Q9BWD1;Q9BWD1-2	Q9BWD1;Q9BWD1-2	Acetyl-CoA acetyltransferase, cytosolic	ACAT2
6.234	5.98286	P50914;E7EPB3	P50914;E7EPB3	60S ribosomal protein L14	RPL14
6.231	5.09991	F8VVA7;P61923;P61923-4;F8VYZ4;P61923-5;F8VXB1;F8W156;F8W651;P61923-3;F8VXR1;F8VYK5;F8VUC5;F8VYE0;P61923-2	F8VVA7;P61923;P61923-4;F8VYZ4;P61923-5;F8VXB1;F8W156;F8W651;P61923-3;F8VXR1	Coatomer subunit zeta-1	COPZ1
6.23	6.53702	Q01518;Q5T0R1;Q5T0R4;Q5T0R3;Q5T0R2;Q5T0R7;Q5T0R6;Q5T0R5;Q5T0S3	Q01518	Adenylyl cyclase-associated protein 1	CAP1
6.23	5.8651	Q15717;Q15717-2;M0QZR9;M0R055;B1APY9;B1APY8;A0A0A0MRX1;A0A0R4J2E6;Q12926-2;Q12926;P26378-4;P26378-2;P26378-5;P26378;P26378-3;B1AM48	Q15717;Q15717-2	ELAV-like protein 1	ELAVL1
6.228	5.76609	P67936;P67936-2;K7ENT6;K7EMU5;K7ERG3;K7EPV9;K7EPB9	P67936;P67936-2;K7ENT6	Tropomyosin alpha-4 chain	TPM4
6.227	5.2891	P00492	P00492	Hypoxanthine-guanine phosphoribosyltransferase	HPRT1
6.226	5.22052	Q9H4M9;A0A024R571;C9JC03;C9J2Z4;C9JDQ8;C9JIJ3;C9IZH1	Q9H4M9;A0A024R571;C9JC03;C9J2Z4	EH domain-containing protein 1	EHD1
6.226	5.72922	P42677;Q5T4L4	P42677;Q5T4L4	40S ribosomal protein S27	RPS27
6.224	5.3925	Q9Y265;Q9Y265-2;E7ETR0;H7C4G5;J3QLR1;H7C4I3	Q9Y265;Q9Y265-2;E7ETR0	RuvB-like 1	RUVBL1
6.224	5.62289	P60891;P60891-2;B1ALA9;B7ZB02;B1ALA7	P60891;P60891-2;B1ALA9	Ribose-phosphate pyrophosphokinase 1	PRPS1
6.222	5.51348	C9J0K6;P30626-2;P30626;P30626-3;B4DHQ6	C9J0K6;P30626-2;P30626;P30626-3;B4DHQ6	Sorcin	SRI
6.222	5.64267	P30048;P30048-2	P30048;P30048-2	Thioredoxin-dependent peroxide reductase, mitochondrial	PRDX3
6.218	5.16614	P54577;A0A0C4DGZ5	P54577;A0A0C4DGZ5	Tyrosine--tRNA ligase, cytoplasmic;Tyrosine--tRNA ligase, cytoplasmic, N-terminally processed;Tyrosine--tRNA ligase	YARS
6.218	5.10819	P28838-2;P28838;H0Y9Q1	P28838-2;P28838	Cytosol aminopeptidase	LAP3
6.216	5.38667	P56537;P56537-2;B7ZBH1;A0A0B4J1Y7;A0A0U1RQV5;F8WD20;F8WDS6	P56537;P56537-2	Eukaryotic translation initiation factor 6	EIF6
6.214	5.66834	O75083;O75083-3;D6RD66	O75083;O75083-3	WD repeat-containing protein 1	WDR1
6.212	5.29831	Q14152;Q14152-2	Q14152;Q14152-2	Eukaryotic translation initiation factor 3 subunit A	EIF3A
6.212	5.69838	P14625;Q96GW1;A0A1W2PRR1;H0YIV0;F8W026;F8VPC7	P14625	Endoplasmin	HSP90B1
6.209	4.90619	Q13243;Q13243-3;B4DJK0;B4DUA4;G3V5K8;Q13243-2	Q13243;Q13243-3;B4DJK0;B4DUA4;G3V5K8;Q13243-2	Serine/arginine-rich splicing factor 5	SRSF5
6.208	3.25991	Q13509;A0A0B4J269;Q13509-2;G3V2A3;G3V5W4;G3V2R8;G3V3R4;G3V2N6;G3V3J6;G3V3W7	Q13509;A0A0B4J269;Q13509-2	Tubulin beta-3 chain	TUBB3
6.205	6.05921	Q02543;M0R117;M0R0P7	Q02543;M0R117;M0R0P7	60S ribosomal protein L18a	RPL18A
6.203	5.20754	P62195;P62195-2;J3QQM1;J3QSA9;J3KRP2;J3QLH6;J3QSE0;J3QRW1;J3QRR3;J3KTQ9	P62195;P62195-2;J3QQM1;J3QSA9;J3KRP2	26S protease regulatory subunit 8	PSMC5
6.202	5.47395	Q13242;H0YIB4;S4R3G0	Q13242;H0YIB4;S4R3G0	Serine/arginine-rich splicing factor 9	SRSF9
6.2	4.45482	F5GZS6;P08195;J3KPF3;P08195-3;P08195-4;F5GZI0;H0YFS2;H0YFX4	F5GZS6;P08195;J3KPF3;P08195-3;P08195-4	4F2 cell-surface antigen heavy chain	SLC3A2
6.199	5.80415	Q07021;I3L3Q7;I3L3B0	Q07021;I3L3Q7;I3L3B0	Complement component 1 Q subcomponent-binding protein, mitochondrial	C1QBP
6.199	5.38218	Q13442;F8WBW6	Q13442	28 kDa heat- and acid-stable phosphoprotein	PDAP1
6.199	3.11747	E9PQ56	E9PQ56		PUF60
6.198	5.16098	Q02790;F5H1U3;H0YFG2;F5H120	Q02790	Peptidyl-prolyl cis-trans isomerase FKBP4;Peptidyl-prolyl cis-trans isomerase FKBP4, N-terminally processed	FKBP4
6.198	5.37935	P04843;B7Z4L4;F8WF32	P04843;B7Z4L4	Dolichyl-diphosphooligosaccharide--protein glycosyltransferase subunit 1	RPN1
6.197	5.48993	Q9P258	Q9P258	Protein RCC2	RCC2
6.197	5.72696	P15121;E9PCX2;E9PEF9	P15121;E9PCX2	Aldose reductase	AKR1B1
6.195	4.62057	Q9Y2V2;H3BUY4;H3BPY5;H3BNU9;H3BSW7;H3BTK3;I3L3X8	Q9Y2V2;H3BUY4;H3BPY5;H3BNU9;H3BSW7	Calcium-regulated heat stable protein 1	CARHSP1
6.193	4.57272	O00571;A0A0D9SFB3;A0A0D9SG12;A0A0D9SF53;O00571-2;O15523-2;O15523;A0A0J9YYH6;O15523-3;B4DLA0;C9J081;A0A087WVZ1;C9J8G5;A0A087WX09;D6RCM4;Q9NQI0-3;Q9NQI0-2;Q9NQI0-4;Q9NQI0;H0Y960	O00571;A0A0D9SFB3;A0A0D9SG12;A0A0D9SF53;O00571-2;O15523-2;O15523	ATP-dependent RNA helicase DDX3X;ATP-dependent RNA helicase DDX3Y	DDX3X;DDX3Y
6.193	5.60578	Q13148;A0A087WX29;Q13148-4	Q13148;A0A087WX29	TAR DNA-binding protein 43	TARDBP
6.192	5.34108	P53396;P53396-2;P53396-3;K7EIE7;K7ESG8	P53396;P53396-2;P53396-3	ATP-citrate synthase	ACLY
6.191	5.64542	Q96AE4;E9PEB5	Q96AE4;E9PEB5	Far upstream element-binding protein 1	FUBP1
6.19	5.65849	Q16181;E7ES33;E7EPK1;Q16181-2;G3V1Q4;A0A0U1RRM2;Q5JXL7;A0A0U1RRE1;A0A0U1RRH9;A0A0U1RRD1;A0A0U1RQK0;Q6ZU15	Q16181;E7ES33;E7EPK1;Q16181-2;G3V1Q4	Septin-7	2018-09-07
6.188	5.72944	P25786;P25786-2;F5GX11;B4DEV8;F5H112	P25786;P25786-2;F5GX11	Proteasome subunit alpha type-1	PSMA1
6.187	4.9887	Q15819;G3V113;H0YBP9;H0YBX6	Q15819;G3V113;H0YBP9;H0YBX6	Ubiquitin-conjugating enzyme E2 variant 2	UBE2V2
6.186	4.91811	P41250;H7C443;F8WCK4	P41250	Glycine--tRNA ligase	GARS
6.181	4.69599	Q14444-2;Q14444;G3V153;E9PLA9	Q14444-2;Q14444;G3V153;E9PLA9	Caprin-1	CAPRIN1
6.18	5.62077	P27824;P27824-2;P27824-3;H0Y9Q7;D6RDP7;D6RGY2;D6RB85;D6RFL1;D6RAU8;H0Y9H1;D6RAQ8;D6RHJ3;D6RD16	P27824;P27824-2;P27824-3	Calnexin	CANX
6.179	5.42028	Q9Y696;A6PVS0;O15247	Q9Y696	Chloride intracellular channel protein 4	CLIC4
6.179	5.79154	Q9Y333	Q9Y333	U6 snRNA-associated Sm-like protein LSm2	LSM2
6.178	5.05712	O43396;K7ER96;K7EML9;K7EPB7;K7EKG2;K7EME7	O43396;K7ER96	Thioredoxin-like protein 1	TXNL1
6.178	4.78814	P43490;A0A0C4DFS8;C9JG65;C9JF35	P43490;A0A0C4DFS8	Nicotinamide phosphoribosyltransferase	NAMPT
6.175	5.13458	O14579;O14579-3;O14579-2;M0R061	O14579;O14579-3;O14579-2	Coatomer subunit epsilon	COPE
6.173	6.38244	P17096;P17096-3	P17096;P17096-3	High mobility group protein HMG-I/HMG-Y	HMGA1
6.171	4.93694	O43324;D6RBD7;C9J1V9;O43324-2;H0YAL7;D6RCQ0;H0YAH9	O43324;D6RBD7;C9J1V9;O43324-2;H0YAL7	Eukaryotic translation elongation factor 1 epsilon-1	EEF1E1;EEF1E1-BLOC1S5
6.17	5.42291	P09496-2;P09496-4;P09496-3;P09496;F8WF69;P09496-5;C9J8P9	P09496-2;P09496-4;P09496-3;P09496;F8WF69;P09496-5	Clathrin light chain A	CLTA
6.163	5.60363	Q15691	Q15691	Microtubule-associated protein RP/EB family member 1	MAPRE1
6.162	4.93712	Q96AG4;I3L223	Q96AG4	Leucine-rich repeat-containing protein 59	LRRC59
6.161	5.70728	Q14011;K7EJV1;K7EMY9;K7EQR7;D6W5Y5;Q14011-2;K7EJV5;K7ER40;K7ENX8;K7ELV6;K7ELT6;Q14011-3;K7EQX4;K7ENN6;K7EIF7;K7EQL0	Q14011;K7EJV1;K7EMY9;K7EQR7;D6W5Y5;Q14011-2;K7EJV5;K7ER40	Cold-inducible RNA-binding protein	CIRBP
6.161	5.855	P51149;C9J592;C9J8S3;C9J4V0;C9J4S4;C9IZZ0;C9J7D1	P51149;C9J592;C9J8S3;C9J4V0	Ras-related protein Rab-7a	RAB7A
6.157	5.3296	Q13347;Q5TFK1	Q13347	Eukaryotic translation initiation factor 3 subunit I	EIF3I
6.155	5.53083	Q15019;Q15019-2;Q15019-3;B5MCX3;C9J2Q4;C9JB25;H7C2Y0;C9J938;C9IY94;C9IZU3;H7C310;C9JQJ4;C9JZI2;B5MD47;A0A1B0GXJ2;C9JFT1;F8WB65;C9JT15;C9JSE7;H7C1T1	Q15019;Q15019-2;Q15019-3;B5MCX3;C9J2Q4	Septin-2	2018-09-02
6.155	5.62474	Q92945;A0A087WTP3;M0R0I5;M0QYH3;M0R3J3;M0QXW7;M0R0C6;M0R251;M0QYG1;M0R263	Q92945;A0A087WTP3	Far upstream element-binding protein 2	KHSRP
6.151	5.46766	Q9C005	Q9C005	Protein dpy-30 homolog	DPY30
6.151	5.39246	O95336;M0R261;M0R0U3;M0R1L2	O95336;M0R261	6-phosphogluconolactonase	PGLS
6.15	5.05604	Q99471;H3BPF6;Q99471-3;H3BMQ1;Q99471-2;F8VNW6;F8VQZ2	Q99471;H3BPF6;Q99471-3;H3BMQ1	Prefoldin subunit 5	PFDN5
6.146	5.20363	O14737;O14737-2;K7ESJ4;K7EQA1;Q3HM38;X6R2P6	O14737;O14737-2;K7ESJ4;K7EQA1	Programmed cell death protein 5	PDCD5
6.146	5.60404	Q15370;Q15370-2;B8ZZU8;A0A0B4J296;I3L0M9	Q15370;Q15370-2;B8ZZU8;A0A0B4J296;I3L0M9	Transcription elongation factor B polypeptide 2	TCEB2
6.145	5.02354	Q9Y285;Q9Y285-2;K7EPH2;K7ER16;K7EK06;K7ERS0	Q9Y285;Q9Y285-2;K7EPH2;K7ER16	Phenylalanine--tRNA ligase alpha subunit	FARSA
6.142	5.03008	Q9UI30;Q9UI30-2;F5GX77;F5GYQ2	Q9UI30;Q9UI30-2;F5GX77;F5GYQ2	Multifunctional methyltransferase subunit TRM112-like protein	TRMT112
6.142	5.09048	P07814;V9GYZ6;V9GZ76	P07814;V9GYZ6	Bifunctional glutamate/proline--tRNA ligase;Glutamate--tRNA ligase;Proline--tRNA ligase	EPRS
6.142	5.40262	P51571;A6NLM8	P51571;A6NLM8	Translocon-associated protein subunit delta	SSR4
6.139	5.50545	P10768;X6RA14;H7BZT7;U3KQT1	P10768;X6RA14;H7BZT7	S-formylglutathione hydrolase	ESD
6.137	4.24225	O43852;O43852-3;O43852-6;O43852-5;O43852-10;O43852-15;O43852-9;H0Y875;O43852-11;O43852-13;O43852-14;O43852-12	O43852;O43852-3;O43852-6;O43852-5;O43852-10;O43852-15;O43852-9	Calumenin	CALU
6.137	4.99104	P31689;P31689-2	P31689;P31689-2	DnaJ homolog subfamily A member 1	DNAJA1
6.137	5.68987	P29692-2;E9PRY8;A0A087X1X7;E9PIZ1;H0YE72;H0YCK7;H0YE58;E9PQC9;E9PQR8;E9PKH7;E9PNC8;E9PPY1;E9PJV8;E9PN56;E9PN71;E9PRL0	P29692-2;E9PRY8;A0A087X1X7		EEF1D
6.136	5.22066	Q13247-3;Q13247;Q13247-2	Q13247-3;Q13247	Serine/arginine-rich splicing factor 6	SRSF6
6.136	5.17256	Q5T5C7	Q5T5C7		SARS
6.135	4.55657	Q58FF8	Q58FF8	Putative heat shock protein HSP 90-beta 2	HSP90AB2P
6.133	4.91982	P22102;P22102-2;F8WD69;C9JBJ1;C9JTV6;C9JZG2;C9JKQ7;A0A140TA71;H7C366	P22102	Trifunctional purine biosynthetic protein adenosine-3;Phosphoribosylamine--glycine ligase;Phosphoribosylformylglycinamidine cyclo-ligase;Phosphoribosylglycinamide formyltransferase	GART
6.131	NaN	P13761;A0A140T958;Q9TQE0;P79483;A0A182DWH4	P13761;A0A140T958;Q9TQE0	HLA class II histocompatibility antigen, DRB1-7 beta chain;HLA class II histocompatibility antigen, DRB1-9 beta chain	HLA-DRB1
6.131	5.3103	O43143	O43143	Pre-mRNA-splicing factor ATP-dependent RNA helicase DHX15	DHX15
6.13	6.21407	P68431	P68431	Histone H3.1	HIST1H3A
6.129	4.12411	P52815	P52815	39S ribosomal protein L12, mitochondrial	MRPL12
6.127	5.60004	P49721;A0A087WVV1	P49721	Proteasome subunit beta type-2	PSMB2
6.127	5.69182	Q9UHD8-4;Q9UHD8-9;Q9UHD8-3;Q9UHD8-8;Q9UHD8-7;Q9UHD8-2;Q9UHD8-5;Q9UHD8;K7EL40;K7EK18;K7ER52;K7EIE4;K7EQD7;K7ELJ9;K7EJZ2;K7EIR4;K7EKN4;K7EN52;K7ENQ5;K7ER14;K7EQ08;K7EJL9	Q9UHD8-4;Q9UHD8-9;Q9UHD8-3;Q9UHD8-8;Q9UHD8-7;Q9UHD8-2;Q9UHD8-5;Q9UHD8;K7EL40;K7EK18	Septin-9	2018-09-09
6.125	5.4162	J3QT28;O43684-2;O43684;J3QSX4	J3QT28;O43684-2;O43684	Mitotic checkpoint protein BUB3	BUB3
6.123	6.24155	P47756-2;B1AK87;B1AK88;P47756;B1AK85	P47756-2;B1AK87;B1AK88;P47756;B1AK85	F-actin-capping protein subunit beta	CAPZB
6.122	5.80748	Q00325-2;Q00325;F8VVM2;F8VWQ0;F8VZL5;F8VWR4;F8VY00;F8VYH5	Q00325-2;Q00325;F8VVM2	Phosphate carrier protein, mitochondrial	SLC25A3
6.121	5.38346	Q9UKY7;Q9UKY7-2;H0Y8K3;D6R9V8;D6RFH2;Q9UKY7-3;D6RDN0;D6RAV0;D6R973	Q9UKY7;Q9UKY7-2;H0Y8K3	Protein CDV3 homolog	CDV3
6.12	5.56487	A0A087WUK2;O14979	A0A087WUK2;O14979	Heterogeneous nuclear ribonucleoprotein D-like	HNRNPDL
6.119	5.87136	P50453;H7BXK7;C9J7N5;A0A0C4DGW9;P50452-3;O75830	P50453	Serpin B9	SERPINB9
6.115	5.515	Q9Y230;Q9Y230-2;M0R0Y3;X6R2L4;M0QXI6;M0R0Z0;M0QXZ7;A0A1W2PS48;A0A1W2PS22	Q9Y230;Q9Y230-2;M0R0Y3	RuvB-like 2	RUVBL2
6.115	5.09348	A8K878;P55145;H7C2D6	A8K878;P55145	Mesencephalic astrocyte-derived neurotrophic factor	MANF
6.115	5.16959	Q9UKK9;A6NFX8;A6NJU6;A6NCQ0;C9JYY9;H0YEY4	Q9UKK9;A6NFX8;A6NJU6	ADP-sugar pyrophosphatase	NUDT5
6.115	2.75049	P13995;P13995-2;B9A062;B8ZZU9;F8WF06;F8WF89	P13995;P13995-2;B9A062;B8ZZU9	Bifunctional methylenetetrahydrofolate dehydrogenase/cyclohydrolase, mitochondrial;NAD-dependent methylenetetrahydrofolate dehydrogenase;Methenyltetrahydrofolate cyclohydrolase	MTHFD2
6.114	6.07189	Q13838;Q13838-2;Q5STU3;F6WLT2;A0A0G2JJZ9;A0A140T9X3;A0A0A0MT12;F6TRA5;F6S4E6;A0A140T996;A0A140T9X9;F6UJC5;A0A140TA18;A0A140T973;A0A140T9K1;A0A140T9L4;F6R6M7;F6QYI9;A0A0G2JJL7;A0A140T9K2;A0A140T9N3;F6U6E2;H0YCC6;A0A0G2JHN7;F6S2B7;H0Y400	Q13838;Q13838-2;Q5STU3;F6WLT2;A0A0G2JJZ9;A0A140T9X3;A0A0A0MT12;F6TRA5;F6S4E6;A0A140T996;A0A140T9X9;F6UJC5;A0A140TA18	Spliceosome RNA helicase DDX39B	DDX39B
6.114	5.3301	Q9Y266;A0A0A0MSU9;A0A0A0MSS4	Q9Y266	Nuclear migration protein nudC	NUDC
6.114	6.32322	P46779;H0YKD8;P46779-2;P46779-3;H0YLP6;H0YMF4;P46779-4;P46779-5	P46779;H0YKD8;P46779-2;P46779-3;H0YLP6;H0YMF4;P46779-4;P46779-5	60S ribosomal protein L28	RPL28
6.113	4.58831	P61086;D6RDM7;P61086-2;P61086-3;D6RFX1	P61086;D6RDM7;P61086-2;P61086-3	Ubiquitin-conjugating enzyme E2 K	UBE2K
6.113	5.19869	Q9NR30;Q9NR30-2	Q9NR30;Q9NR30-2	Nucleolar RNA helicase 2	DDX21
6.113	5.2584	O75821;K7ENA8;K7EL20;K7ER90;K7EP16;K7ENH0	O75821;K7ENA8;K7EL20;K7ER90	Eukaryotic translation initiation factor 3 subunit G	EIF3G
6.112	5.55184	P68366;P68366-2;C9JEV8;C9JQ00;C9JJQ8;C9JDL2	P68366;P68366-2	Tubulin alpha-4A chain	TUBA4A
6.111	5.96494	O15143;C9J4Z7;F8VXW2;C9JEY1;C9JQM8;C9JFG9;C9J6C8;C9JBJ7;C9K057;C9JTT6;C9JM51;F8WEB3	O15143	Actin-related protein 2/3 complex subunit 1B	ARPC1B
6.111	5.21381	O14561;H3BNK3;I3L505;H3BNE8	O14561;H3BNK3	Acyl carrier protein, mitochondrial;Acyl carrier protein	NDUFAB1
6.111	6.16655	P49207	P49207	60S ribosomal protein L34	RPL34
6.11	5.38884	Q9NR31;Q9NR31-2;H0Y5E8;Q5SQT8	Q9NR31;Q9NR31-2	GTP-binding protein SAR1a	SAR1A
6.109	5.57837	O95777;C9JIZ0;F2Z2Y6;C9JNV3	O95777;C9JIZ0;F2Z2Y6;C9JNV3	U6 snRNA-associated Sm-like protein LSm8	LSM8
6.109	5.26327	P18754-2;P18754;C9JW69;C9JRH2;C9JMJ4;C9JQZ4;M0R1Q8	P18754-2;P18754;C9JW69;C9JRH2;C9JMJ4;C9JQZ4	Regulator of chromosome condensation	RCC1
6.108	5.23735	Q04917;A2IDB2;F8WEB6;A2IDB1	Q04917	14-3-3 protein eta	YWHAH
6.107	5.61855	Q16836;A0A0D9SFP2;E9PF18;Q16836-3;Q16836-2;A0A0A0MSE2;A0A1W2PNM1;A0A1W2PQV5;A0A1W2PQC2;A0A1W2PQ78;A0A1W2PRT2	Q16836;A0A0D9SFP2;E9PF18;Q16836-3;Q16836-2;A0A0A0MSE2;A0A1W2PNM1;A0A1W2PQV5;A0A1W2PQC2;A0A1W2PQ78;A0A1W2PRT2	Hydroxyacyl-coenzyme A dehydrogenase, mitochondrial	HADH
6.106	5.38552	Q86U42-2;Q86U42;B4DEH8;G3V4T2;H0YJH9;A6NDY0-2;A6NDY0;A6NDY0-4	Q86U42-2;Q86U42;B4DEH8;G3V4T2	Polyadenylate-binding protein 2	PABPN1
6.106	5.24738	P43686;P43686-2	P43686;P43686-2	26S protease regulatory subunit 6B	PSMC4
6.104	5.54559	Q13263;Q13263-2;M0R0K9;M0R3C0;M0R2I3	Q13263;Q13263-2	Transcription intermediary factor 1-beta	TRIM28
6.104	5.43104	Q13177;H7C1X3;E9PM17;B3KNX7;Q13153;Q13153-2;H0YCG5;B1AKS5	Q13177	Serine/threonine-protein kinase PAK 2;PAK-2p27;PAK-2p34	PAK2
6.104	4.80635	Q9Y4L1;A0A087X054;E9PJ21;A0A087WWI4;K7EQK2;Q9Y4L1-2;J3KTF1;J3QL06;Q9BST8;J3QQH7;J3QLE9;A0A087WW13;A0A087X214	Q9Y4L1;A0A087X054;E9PJ21;A0A087WWI4;K7EQK2;Q9Y4L1-2	Hypoxia up-regulated protein 1	HYOU1
6.103	5.71583	P31942-2;P31942;P31942-3;P31942-4;P31942-6;P31942-5	P31942-2;P31942;P31942-3;P31942-4	Heterogeneous nuclear ribonucleoprotein H3	HNRNPH3
6.103	5.7845	P24539;Q5QNZ2	P24539;Q5QNZ2	ATP synthase F(0) complex subunit B1, mitochondrial	ATP5F1
6.1	5.25694	P78347-2;P78347-4;P78347-3;P78347;P78347-5;C9J6M0;A0A087WW90;A0A0D9SF80;A0A0A0MSY2;Q86UP8-3;Q6EKJ0;Q86UP8-4;Q86UP8-2;Q6EKJ0-2;Q86UP8-5	P78347-2;P78347-4;P78347-3;P78347	General transcription factor II-I	GTF2I
6.099	4.93212	P62495;B7Z7P8;P62495-2;I3L492;D6RJE8;D6RCB3	P62495;B7Z7P8;P62495-2	Eukaryotic peptide chain release factor subunit 1	ETF1
6.098	6.1067	P04899;P04899-4;P04899-6;P04899-3;P04899-5;P04899-2;P63096-2;P09471-2;P11488;P19087;A8MTJ3;P09471;A0A1W2PRE1;A2A2R6;A0A1W2PQK2;A0A087WTB6;A0A1W2PRJ7;A0A087WZE5;F8WE78;C9JPP4;A0A1W2PS82;H3BTM2;A0A1W2PP38	P04899;P04899-4;P04899-6;P04899-3;P04899-5;P04899-2	Guanine nucleotide-binding protein G(i) subunit alpha-2	GNAI2
6.097	5.16361	P62191;P62191-2;G3V4X1	P62191;P62191-2	26S protease regulatory subunit 4	PSMC1
6.096	5.31466	Q5JRI1;O75494-5;O75494-4;O75494-6;O75494-3;O75494-2;O75494;Q6IQ42;Q8WXF0;R4GMP8	Q5JRI1;O75494-5;O75494-4;O75494-6;O75494-3;O75494-2;O75494	Serine/arginine-rich splicing factor 10	SRSF10
6.096	5.37156	P28070	P28070	Proteasome subunit beta type-4	PSMB4
6.095	4.31108	Q9Y383;V9GZ75;F8WEU3	Q9Y383	Putative RNA-binding protein Luc7-like 2	LUC7L2
6.094	5.24368	P35998;A0A1W2PQS1;P35998-2;C9JLS9	P35998;A0A1W2PQS1;P35998-2	26S protease regulatory subunit 7	PSMC2
6.093	5.2456	Q9UBQ5;Q9UBQ5-2;K7ERF1;K7ES31;A0A087WVB9;K7EQM4	Q9UBQ5;Q9UBQ5-2;K7ERF1;K7ES31;A0A087WVB9;K7EQM4	Eukaryotic translation initiation factor 3 subunit K	EIF3K
6.093	5.42602	P34932;A0A087WYC1;A0A087WTS8;P34932-2	P34932;A0A087WYC1;A0A087WTS8	Heat shock 70 kDa protein 4	HSPA4
6.092	5.94899	P62993;P62993-2;J3KT38;J3QRL5;J3QLF6	P62993;P62993-2	Growth factor receptor-bound protein 2	GRB2
6.091	5.39891	P63208;E5RJR5;E7ERH2;F8W8N3;P63208-2;E5RGM3;E5RHM3;E5RGM4	P63208;E5RJR5;E7ERH2;F8W8N3;P63208-2	S-phase kinase-associated protein 1	SKP1
6.09	5.62304	P54727;P54727-2;Q5W0S5;H0Y579;Q5W0S4	P54727;P54727-2	UV excision repair protein RAD23 homolog B	RAD23B
6.087	4.62618	P35249;C9JZI1;P35249-2;C9J8M3;C9JTT7;C9JXZ7;C9JGY5;F8WE44;H7C1P0;C9JW34	P35249;C9JZI1;P35249-2;C9J8M3;C9JTT7	Replication factor C subunit 4	RFC4
6.086	5.24775	O00231;O00231-2;J3QRY4;J3QS13;J3KSW3	O00231;O00231-2	26S proteasome non-ATPase regulatory subunit 11	PSMD11
6.086	5.49104	Q16851;A0A087WYS1;E7EUC7;C9JQU9;C9J6Q0	Q16851;A0A087WYS1;E7EUC7	UTP--glucose-1-phosphate uridylyltransferase	UGP2
6.086	5.22751	Q9BUL8;C9J5C3;C9J6F3;C9J363;C9JND6;C9JSA3;H7C5M9;C9J932;F8WDF3	Q9BUL8;C9J5C3;C9J6F3;C9J363;C9JND6;C9JSA3;H7C5M9	Programmed cell death protein 10	PDCD10
6.083	5.72182	P0DN76;Q01081;Q01081-2;Q01081-4;Q8WU68-3;Q8WU68;A0A1B0GW87;M0QYK5;M0R2N4;Q01081-3;Q8WU68-2;K7EJH3;K7EJM7	P0DN76;Q01081;Q01081-2;Q01081-4	Splicing factor U2AF 35 kDa subunit	U2AF1
6.081	5.2655	Q15046;Q15046-2;H3BVA8;J3KRL2;H3BPV7;H3BRC9	Q15046;Q15046-2	Lysine--tRNA ligase	KARS
6.08	5.16355	O15212;A2AB88	O15212;A2AB88	Prefoldin subunit 6	PFDN6
6.079	2.06212	P54687-4;P54687;P54687-5;P54687-3;P54687-2;F5H2F2;A0A087WYF2	P54687-4;P54687;P54687-5;P54687-3;P54687-2	Branched-chain-amino-acid aminotransferase, cytosolic	BCAT1
6.077	4.98046	Q9UHD1;Q9UHD1-2;E9PHZ2	Q9UHD1;Q9UHD1-2	Cysteine and histidine-rich domain-containing protein 1	CHORDC1
6.076	5.0122	P51665;H3BNT7;H3BTM8;H3BQV2	P51665;H3BNT7;H3BTM8	26S proteasome non-ATPase regulatory subunit 7	PSMD7
6.076	5.66377	P46940;A0A0J9YXZ5;H0YLE8;A0A087X225;A0A087WWP1;H0YKA5	P46940;A0A0J9YXZ5;H0YLE8	Ras GTPase-activating-like protein IQGAP1	IQGAP1
6.072	5.22432	Q8IUE6	Q8IUE6	Histone H2A type 2-B	HIST2H2AB
6.067	3.99597	P33993;P33993-3;P33993-2;C9J8M6	P33993;P33993-3	DNA replication licensing factor MCM7	MCM7
6.067	5.2428	A0A087X2I1;P62333;H0YJC0;H0YJS8;H0YJX2;H0YJT1;H0YJE9	A0A087X2I1;P62333	26S protease regulatory subunit 10B	PSMC6
6.067	5.60009	Q9Y4Y9;Q9Y4Y9-2;B8ZZF8	Q9Y4Y9;Q9Y4Y9-2	U6 snRNA-associated Sm-like protein LSm5	LSM5
6.066	3.61024	Q14697;F5H6X6	Q14697;F5H6X6	Neutral alpha-glucosidase AB	GANAB
6.065	4.96573	O76003	O76003	Glutaredoxin-3	GLRX3
6.065	5.9508	Q969Q0	Q969Q0	60S ribosomal protein L36a-like	RPL36AL
6.064	4.66442	Q15843	Q15843	NEDD8	NEDD8
6.063	4.67029	P19623;K7EKM4;K7ESL0;K7EQ47;K7EL89	P19623	Spermidine synthase	SRM
6.063	4.72697	P49915;P49915-2	P49915;P49915-2	GMP synthase [glutamine-hydrolyzing]	GMPS
6.062	5.39083	Q9GZT3-2;Q9GZT3;A0A087WUN7;H0YJ40;G3V4X6;G3V2S9;H0YJW7;H0YJ07;H0YJU7;H0YJI1	Q9GZT3-2;Q9GZT3;A0A087WUN7;H0YJ40;G3V4X6;G3V2S9;H0YJW7	SRA stem-loop-interacting RNA-binding protein, mitochondrial	SLIRP
6.061	5.55835	Q9Y277;Q9Y277-2;E5RJN6;E5RHZ6;E5RFP6;E5RHE1;E5RK27;E5RFL1	Q9Y277;Q9Y277-2;E5RJN6;E5RHZ6;E5RFP6	Voltage-dependent anion-selective channel protein 3	VDAC3
6.059	4.71307	Q9BQA1;Q9BQA1-2;H0Y711	Q9BQA1;Q9BQA1-2;H0Y711	Methylosome protein 50	WDR77
6.058	2.63936	P52292;J3QLL0;J3KS65;J3QL07	P52292	Importin subunit alpha-1	KPNA2
6.057	5.70295	P22695;H3BRG4;H3BSJ9;H3BP04;H3BUE4;H3BUI9;A0A087WVZ4	P22695;H3BRG4;H3BSJ9	Cytochrome b-c1 complex subunit 2, mitochondrial	UQCRC2
6.053	5.2218	P17980;E9PM69;E9PKD5;E9PMD8	P17980;E9PM69;E9PKD5;E9PMD8	26S protease regulatory subunit 6A	PSMC3
6.051	5.02241	P15170-2;P15170-3;P15170;H3BR35;H3BSV8	P15170-2;P15170-3;P15170;H3BR35	Eukaryotic peptide chain release factor GTP-binding subunit ERF3A	GSPT1
6.048	5.62957	P35244;B5MC59	P35244;B5MC59	Replication protein A 14 kDa subunit	RPA3
6.047	3.63846	P28074;P28074-3;P28074-2;H0YJM8;G8JLC2;G3V3K3	P28074;P28074-3;P28074-2	Proteasome subunit beta type-5	PSMB5
6.046	6.14739	O15511;B1ALC0;O15511-2	O15511;B1ALC0;O15511-2	Actin-related protein 2/3 complex subunit 5	ARPC5
6.046	NaN	F8VRH0	F8VRH0		PCBP2
6.045	5.14432	B3KS98;O15372;A0A087WZK9;E5RGU4;E5RFH0;E5RFW7;E5RHC7;E5RH59;REV__Q2WGJ6	B3KS98;O15372;A0A087WZK9	Eukaryotic translation initiation factor 3 subunit H	EIF3H
6.044	5.01045	P62877	P62877	E3 ubiquitin-protein ligase RBX1;E3 ubiquitin-protein ligase RBX1, N-terminally processed	RBX1
6.043	5.56138	Q9BWJ5	Q9BWJ5	Splicing factor 3B subunit 5	SF3B5
6.041	5.7035	O75937;S4R3J5	O75937	DnaJ homolog subfamily C member 8	DNAJC8
6.041	5.369	Q15631;E9PGT1;H7C1D4;Q15631-2;A0A0J9YVW2	Q15631;E9PGT1;H7C1D4;Q15631-2	Translin	TSN
6.04	5.81714	P35659;B4DFG0;P35659-2;D6RDA2;H0Y993;D6R9L5;H0Y8X0	P35659;B4DFG0;P35659-2	Protein DEK	DEK
6.039	4.47206	P01591;D6RD17;D6RHJ6;C9JA05	P01591;D6RD17;D6RHJ6	Immunoglobulin J chain	IGJ;JCHAIN
6.038	5.14449	A0A1W2PPH1;P23368;A0A1W2PQT3;A0A1W2PQH3;A0A1W2PQY8;A0A1W2PR68;A0A1W2PQF8;P23368-2;A0A1W2PQ37;A0A1W2PRS2;A0A1W2PRY9;A0A1W2PQH4;A0A1W2PRH1;A0A1W2PPY2;Q6TCH8;E9PMB9;Q16798-2;Q16798	A0A1W2PPH1;P23368;A0A1W2PQT3;A0A1W2PQH3;A0A1W2PQY8;A0A1W2PR68;A0A1W2PQF8;P23368-2;A0A1W2PQ37	NAD-dependent malic enzyme, mitochondrial	ME2
6.036	5.38702	P68402;J3KNE3;P68402-3;P68402-2;P68402-4	P68402;J3KNE3;P68402-3;P68402-2;P68402-4	Platelet-activating factor acetylhydrolase IB subunit beta	PAFAH1B2
6.036	4.3367	D6RGI3;D6RER5;Q9NVA2;Q9NVA2-2;D6RDU5;H0Y961;D6RDP1;D6R9Y6;H0Y9G8;E7EW69;E7EX04;B5ME97;Q9P0V9-3;Q9P0V9;Q9P0V9-2	D6RGI3;D6RER5;Q9NVA2;Q9NVA2-2;D6RDU5	Septin-11	2018-09-11
6.035	5.21676	P42704;A0A0C4DG06;B8ZZ38;C9JCA9;H7C3W8	P42704	Leucine-rich PPR motif-containing protein, mitochondrial	LRPPRC
6.035	5.76794	Q04760;Q04760-2	Q04760;Q04760-2	Lactoylglutathione lyase	GLO1
6.034	5.18222	Q9NSD9;Q9NSD9-2	Q9NSD9;Q9NSD9-2	Phenylalanine--tRNA ligase beta subunit	FARSB
6.034	4.81947	P41252;A0A0A0MSX9;J3KR24;Q5TCD1;Q5TCC6;Q5TCC9	P41252;A0A0A0MSX9;J3KR24	Isoleucine--tRNA ligase, cytoplasmic	IARS
6.029	4.921	O00244;E5RIM7;E5RGN3	O00244;E5RIM7;E5RGN3	Copper transport protein ATOX1	ATOX1
6.027	5.20531	P60228;E5RGA2;H0YBR5;E5RHS5;H0YAW4;E5RIT4;E5RII3;E5RIP5;E5RJ25;H0YBP5	P60228;E5RGA2	Eukaryotic translation initiation factor 3 subunit E	EIF3E
6.027	6.24058	P10606	P10606	Cytochrome c oxidase subunit 5B, mitochondrial	COX5B
6.026	4.80628	P49588;H3BPK7	P49588	Alanine--tRNA ligase, cytoplasmic	AARS
6.022	5.73323	A0A1W2PQ51;Q92841-3;A0A0U1RQJ0	A0A1W2PQ51;Q92841-3	Probable ATP-dependent RNA helicase DDX17	DDX17
6.02	4.0778	Q96C36;A0A087WTV6;A0A087WZR9;J3KR12;A0A087WX69;A0A087WZF0	Q96C36;A0A087WTV6;A0A087WZR9;J3KR12	Pyrroline-5-carboxylate reductase 2;Pyrroline-5-carboxylate reductase	PYCR2
6.02	4.94675	Q16555;A0A1C7CYX9;Q16555-2;Q14195;E5RFU4;Q14195-2;H0YBT4;E9PD68;Q14194;Q14194-2;D6RF19	Q16555;A0A1C7CYX9;Q16555-2	Dihydropyrimidinase-related protein 2	DPYSL2
6.019	6.39731	O75367-3;O75367;B4DJC3;D6RCF2;Q9P0M6;Q5SQT3	O75367-3;O75367;B4DJC3	Core histone macro-H2A.1;Histone H2A	H2AFY
6.019	4.58205	Q13907;Q13907-2;C9JKM8;C9JD53;Q9BXS1	Q13907;Q13907-2	Isopentenyl-diphosphate Delta-isomerase 1	IDI1
6.018	5.298	P52209-2;P52209;K7EM49;K7EPF6;K7EMN2;K7ELN9	P52209-2;P52209	6-phosphogluconate dehydrogenase, decarboxylating	PGD
6.018	5.44264	Q16718;A0A087X1G1;H7BYD0;Q16718-2;F8WAS3;A0A087WXR5;C9IZN5	Q16718;A0A087X1G1;H7BYD0;Q16718-2;F8WAS3;A0A087WXR5	NADH dehydrogenase [ubiquinone] 1 alpha subcomplex subunit 5	NDUFA5
6.017	5.20752	Q9Y262;B0QY89;Q9Y262-2;B0QY90;C9JHP4;C9K0Q7;H7C3A0;H0Y7E6	Q9Y262;B0QY89;Q9Y262-2;B0QY90	Eukaryotic translation initiation factor 3 subunit L	EIF3L
6.014	5.10008	P60981;P60981-2;F6RFD5	P60981;P60981-2;F6RFD5	Destrin	DSTN
6.014	5.60198	Q96PK6;Q96PK6-2;A0A0A6YYI9;F8WDX3;A0A0A0MSL8;B8ZZ74;Q96PK6-3;Q96PK6-4	Q96PK6	RNA-binding protein 14	RBM14
6.012	4.58433	Q9Y5V0;H0YC70;E5RHV4;H0YAP1;E5RHR6	Q9Y5V0;H0YC70;E5RHV4;H0YAP1;E5RHR6	Zinc finger protein 706	ZNF706
6.01	4.73732	P28907;H0Y950;P28907-2	P28907	ADP-ribosyl cyclase/cyclic ADP-ribose hydrolase 1	CD38
6.008	5.51557	C9J6N5;C9JQ40;C9JW51;A0A1C7CYX8;Q9H098;Q9H098-2;C9J3Q3;X6RET8;C9JP05;C9JYP1;C9J6Y8;F8WCJ2	C9J6N5;C9JQ40;C9JW51;A0A1C7CYX8;Q9H098;Q9H098-2;C9J3Q3;X6RET8;C9JP05	Protein FAM107B	FAM107B
6.007	5.53822	Q9Y224;G3V4C6;H0YJB9;G3V4E7	Q9Y224;G3V4C6	UPF0568 protein C14orf166	C14orf166
6.006	4.92793	O75995	O75995	SAM and SH3 domain-containing protein 3	SASH3
6.006	5.79406	B8ZZN6;P63165;B8ZZJ0;B9A032;B8ZZ67;P63165-2	B8ZZN6;P63165;B8ZZJ0;B9A032	Small ubiquitin-related modifier 1	SUMO1
6.004	5.66865	Q14739;C9JXK0;C9JES9	Q14739;C9JXK0	Lamin-B receptor	LBR
6.003	5.11049	P61221;D6R9I9;D6RGF4;H0Y990	P61221;D6R9I9	ATP-binding cassette sub-family E member 1	ABCE1
6.003	5.55848	P50995-2;P50995;H0Y6E1	P50995-2;P50995	Annexin A11	ANXA11
6.003	6.00127	B4DUT8;Q99439;B4DDF4;Q99439-2;A0A087X1X5;A0A087X271;H3BVI6;K7ES69;H3BQH0;U3KPS3;Q15417-3;Q15417;A0A087WV51;K7EQ72;E9PDU6;Q15417-2	B4DUT8;Q99439;B4DDF4;Q99439-2;A0A087X1X5;A0A087X271;H3BVI6	Calponin;Calponin-2	CNN2
6.002	5.0609	K7EKE6;P36776-2;P36776;K7EJE8;P36776-3;K7ER27;K7ERR6;K7EQF8;K7ER56	K7EKE6;P36776-2;P36776;K7EJE8;P36776-3	Lon protease homolog, mitochondrial	LONP1
6.002	5.63867	Q9NPE3;H0YM60	Q9NPE3	H/ACA ribonucleoprotein complex subunit 3	NOP10
6	5.19386	O00170;E9PMH2;V9GYQ3	O00170;E9PMH2	AH receptor-interacting protein	AIP
5.999	5.87182	P30040;F8VY02;F8W1G0;P30040-2	P30040;F8VY02	Endoplasmic reticulum resident protein 29	ERP29
5.999	5.30137	Q08945;E9PMD4;A0A0U1RRK2;E9PPZ7	Q08945	FACT complex subunit SSRP1	SSRP1
5.998	NaN	Q9NZI8;Q9NZI8-2	Q9NZI8;Q9NZI8-2	Insulin-like growth factor 2 mRNA-binding protein 1	IGF2BP1
5.998	4.91597	Q9Y2Z0	Q9Y2Z0	Suppressor of G2 allele of SKP1 homolog	SUGT1
5.997	4.53125	Q9BRT6	Q9BRT6	Protein LLP homolog	LLPH
5.997	4.42154	P05091;P05091-2;F8VP50;S4R3S4;H0YMG7;O94788-4;O94788-2;O94788-3;O94788;H0YKL3	P05091;P05091-2	Aldehyde dehydrogenase, mitochondrial	ALDH2
5.997	5.9913	C9JXB8;C9JNW5;P83731	C9JXB8;C9JNW5;P83731	60S ribosomal protein L24	RPL24
5.996	5.11198	P53618;E9PP73;E9PP63;E9PKQ1	P53618;E9PP73	Coatomer subunit beta	COPB1
5.995	4.99428	E7EU96;P68400;Q8NEV1;P68400-2;A0A087WY74;V9GYA2;V9GY80;V9GYW6	E7EU96;P68400;Q8NEV1;P68400-2	Casein kinase II subunit alpha;Casein kinase II subunit alpha 3	CSNK2A1;CSNK2A3
5.994	4.55225	Q969H8;M0QXF7;M0QYN0	Q969H8;M0QXF7;M0QYN0	Myeloid-derived growth factor	MYDGF
5.994	5.24384	P30085;Q5T0D2;P30085-2;E9PJD2	P30085;Q5T0D2;P30085-2	UMP-CMP kinase	CMPK1
5.994	5.6004	P11766;H0YAG8;D6RFE4;D6R9G2;D6RAY0	P11766;H0YAG8	Alcohol dehydrogenase class-3	ADH5
5.993	4.41622	P27708;F8VPD4;H7C2E4;H7C3Z5	P27708;F8VPD4	CAD protein;Glutamine-dependent carbamoyl-phosphate synthase;Aspartate carbamoyltransferase;Dihydroorotase	CAD
5.993	5.09368	P23919;P23919-2;H7C312;H7BZ20;G5E9E9;H7C3A4	P23919;P23919-2;H7C312;H7BZ20	Thymidylate kinase	DTYMK
5.993	5.57291	P09622;E9PEX6;P09622-2;P09622-3;F8WDM5;A0A1W2PR83;F2Z2E3	P09622;E9PEX6;P09622-2;P09622-3	Dihydrolipoyl dehydrogenase, mitochondrial;Dihydrolipoyl dehydrogenase	DLD
5.993	3.86366	P33991;E5RG31;E5RFJ8;E5RFR3	P33991	DNA replication licensing factor MCM4	MCM4
5.992	5.26968	Q14498-2;Q14498;Q14498-3;G3XAC6;H0Y4X3;A0A0U1RQH7;Q5QP23;A0A0U1RQW2;Q5QP22;F8WF24;F2Z2Z5;A8MYG5;F2Z3E6;A0A087X122	Q14498-2;Q14498;Q14498-3;G3XAC6;H0Y4X3;A0A0U1RQH7	RNA-binding protein 39	RBM39
5.992	5.02375	P17174;P17174-2	P17174;P17174-2	Aspartate aminotransferase, cytoplasmic	GOT1
5.992	4.69438	Q92621;U3KPX2;U3KQ97;U3KQ47	Q92621	Nuclear pore complex protein Nup205	NUP205
5.991	5.68886	P30049	P30049	ATP synthase subunit delta, mitochondrial	ATP5D
5.991	5.59575	Q9H299;Q5T123	Q9H299;Q5T123	SH3 domain-binding glutamic acid-rich-like protein 3	SH3BGRL3
5.99	5.35557	P08621;P08621-2;P08621-4;P08621-3;M0QYR1;M0QX04	P08621;P08621-2;P08621-4	U1 small nuclear ribonucleoprotein 70 kDa	SNRNP70
5.988	5.50315	O43809;H3BND3;H3BV41	O43809;H3BND3	Cleavage and polyadenylation specificity factor subunit 5	NUDT21
5.987	5.79166	P42166	P42166	Lamina-associated polypeptide 2, isoform alpha;Thymopoietin;Thymopentin	TMPO
5.986	4.14265	Q9NX55;J3QT56;Q9NX55-3	Q9NX55	Huntingtin-interacting protein K	HYPK
5.985	4.5979	O96008;O96008-2;K7EJ57;K7EKG4	O96008;O96008-2	Mitochondrial import receptor subunit TOM40 homolog	TOMM40
5.983	5.4948	Q86VP6;Q86VP6-2;A0A0C4DGH5;H0YH27;Q86VP6-3;F5H6I6;O75155-2;O75155;F8WBB8	Q86VP6;Q86VP6-2;A0A0C4DGH5	Cullin-associated NEDD8-dissociated protein 1	CAND1
5.981	4.82893	P56192;P56192-2;H0YIP0;F5H2V6;H0YHV5;H0YI94;F8VS26;F8W0M7;F8W0S4;F8VZZ9;F8VPL7;H0YHL6;H0YI27	P56192;P56192-2	Methionine--tRNA ligase, cytoplasmic	MARS
5.981	5.18216	P11586;F5H2F4;V9GYY3;V9GY75	P11586;F5H2F4	C-1-tetrahydrofolate synthase, cytoplasmic;Methylenetetrahydrofolate dehydrogenase;Methenyltetrahydrofolate cyclohydrolase;Formyltetrahydrofolate synthetase;C-1-tetrahydrofolate synthase, cytoplasmic, N-terminally processed	MTHFD1
5.981	5.21428	O96019;O96019-2;H7C5S0;C9JQT2;O94805	O96019;O96019-2	Actin-like protein 6A	ACTL6A
5.98	5.07537	Q9Y3F4;Q9Y3F4-2;H0YH33;F5H1G1	Q9Y3F4;Q9Y3F4-2	Serine-threonine kinase receptor-associated protein	STRAP
5.979	4.79752	Q9H773;H3BSA6;H3BPN2	Q9H773	dCTP pyrophosphatase 1	DCTPP1
5.979	3.71582	P30047;P30047-2;H0YNM1;H0YNX7;A0A087WTI4	P30047;P30047-2;H0YNM1;H0YNX7	GTP cyclohydrolase 1 feedback regulatory protein	GCHFR
5.978	5.45885	Q9BPX5	Q9BPX5	Actin-related protein 2/3 complex subunit 5-like protein	ARPC5L
5.976	5.77987	P07355;P07355-2;H0YN42;H0YMD0;H0YMU9;H0YM50;A6NMY6;H0YNP5;H0YN28;H0YL33;H0YKS4;H0YMM1;H0YKZ7;H0YLV6;H0YMT9;H0YKX9;H0YKL9;H0YMW4;H0YNA0;H0YKV8;H0YMD9;H0YN52;H0YNB8;H0YKN4;H0YLE2	P07355;P07355-2;H0YN42;H0YMD0;H0YMU9;H0YM50;A6NMY6	Annexin A2;Annexin;Putative annexin A2-like protein	ANXA2;ANXA2P2
5.976	5.10317	Q13200;Q13200-2;C9JPC0;H7C2Q3;H7C1H2;F8WBS8	Q13200;Q13200-2	26S proteasome non-ATPase regulatory subunit 2	PSMD2
5.975	5.92593	J3QQM5;Q9BT23;J3QL69;J3KRR0	J3QQM5;Q9BT23;J3QL69;J3KRR0	LIM domain-containing protein 2	LIMD2
5.974	5.77467	Q1KMD3;H3BQZ7	Q1KMD3;H3BQZ7	Heterogeneous nuclear ribonucleoprotein U-like protein 2	HNRNPUL2;HNRNPUL2-BSCL2
5.972	5.31303	Q15393;Q15393-3;Q15393-2;I3L4G7;J3QL37;H3BMB0;J3QRB2;J3QKV4	Q15393	Splicing factor 3B subunit 3	SF3B3
5.972	4.99182	P54136;E5RJM9;E5RH09	P54136	Arginine--tRNA ligase, cytoplasmic	RARS
5.971	5.48726	Q9H9B4;D6RFI0;S4R2X2;D6RDG7;D6RAE9	Q9H9B4;D6RFI0	Sideroflexin-1	SFXN1
5.97	5.69973	P31930	P31930	Cytochrome b-c1 complex subunit 1, mitochondrial	UQCRC1
5.97	4.19582	P60520;H3BSM5;H3BQ50;H3BU36	P60520;H3BSM5	Gamma-aminobutyric acid receptor-associated protein-like 2	GABARAPL2
5.97	5.11976	O75822;O75822-3;O75822-2;H0YLP3;H0YGJ7	O75822;O75822-3;O75822-2;H0YLP3	Eukaryotic translation initiation factor 3 subunit J	EIF3J
5.969	5.56304	P51148;P51148-2;K7ENY4;K7ERI8;F8VVK3;F8VWU4;F8VSF8;K7EIP6	P51148;P51148-2;K7ENY4;K7ERI8;F8VVK3	Ras-related protein Rab-5C	RAB5C
5.969	4.88835	P55010;H0YLZ1;H0YN40;H0YMJ8;H0YM54;H0YK11;H0YK29	P55010	Eukaryotic translation initiation factor 5	EIF5
5.968	5.59726	P20340-2;P20340-4;Q53S08;Q9H0N0	P20340-2;P20340-4	Ras-related protein Rab-6A	RAB6A
5.966	4.52752	Q9NQP4;E9PQY2	Q9NQP4;E9PQY2	Prefoldin subunit 4	PFDN4
5.966	6.44885	P26038;V9GZ54	P26038	Moesin	MSN
5.966	5.88992	P00367;P00367-3;P00367-2;P49448	P00367;P00367-3;P00367-2;P49448	Glutamate dehydrogenase 1, mitochondrial;Glutamate dehydrogenase 2, mitochondrial	GLUD1;GLUD2
5.964	5.26151	Q9Y6A9;C9JBL1;X6R2S6	Q9Y6A9;C9JBL1;X6R2S6	Signal peptidase complex subunit 1	SPCS1
5.964	5.23253	Q12874	Q12874	Splicing factor 3A subunit 3	SF3A3
5.962	4.87863	Q15555;Q15555-3;Q15555-4;Q15555-2	Q15555;Q15555-3;Q15555-4;Q15555-2	Microtubule-associated protein RP/EB family member 2	MAPRE2
5.962	5.2285	B4DR80;Q9Y6E0-2;Q9Y6E0;H0Y630;Q5JV98;Q5JV99	B4DR80;Q9Y6E0-2;Q9Y6E0;H0Y630;Q5JV98	Serine/threonine-protein kinase 24;Serine/threonine-protein kinase 24 36 kDa subunit;Serine/threonine-protein kinase 24 12 kDa subunit	STK24
5.96	5.15445	P55884;P55884-2;C9JZG1;C9JQN7	P55884;P55884-2	Eukaryotic translation initiation factor 3 subunit B	EIF3B
5.96	5.60028	P42765;A0A0B4J2A4;K7EME0;K7EJ68;K7EJB1;K7ER88	P42765;A0A0B4J2A4;K7EME0	3-ketoacyl-CoA thiolase, mitochondrial	ACAA2
5.959	4.85828	P25205;P25205-2	P25205;P25205-2	DNA replication licensing factor MCM3	MCM3
5.957	4.61533	Q12931-2;Q12931;I3L0K7;I3L239;I3L253;I3L2D5	Q12931-2;Q12931;I3L0K7	Heat shock protein 75 kDa, mitochondrial	TRAP1
5.957	6.14401	P09960;P09960-4;P09960-2;P09960-3;B4DEH5	P09960;P09960-4;P09960-2;P09960-3	Leukotriene A-4 hydrolase	LTA4H
5.955	4.72943	Q9NR45;Q5TBR1;Q5TBR0	Q9NR45	Sialic acid synthase	NANS
5.953	4.73071	P33992;B1AHB1;B1AHA9;F8WFD7	P33992;B1AHB1	DNA replication licensing factor MCM5;DNA helicase	MCM5
5.953	5.13357	P54578;P54578-2;P54578-3;A6NJA2;J3QQT6;J3KS55	P54578;P54578-2;P54578-3;A6NJA2	Ubiquitin carboxyl-terminal hydrolase 14;Ubiquitin carboxyl-terminal hydrolase	USP14
5.952	5.34328	Q13435;E9PPJ0;E9PJ04;H0YCG1;E9PJT3;H0YEX5;E9PIL8	Q13435;E9PPJ0	Splicing factor 3B subunit 2	SF3B2
5.949	5.00221	O15371-3;O15371;O15371-2;B0QYA5;B0QYA6;B0QYA4;B0QYA8;A0A0D9SGB5	O15371-3;O15371;O15371-2	Eukaryotic translation initiation factor 3 subunit D	EIF3D
5.948	5.18655	P46060;H0Y4Q3;B0QYT5;B0QYT4;B0QYT6	P46060	Ran GTPase-activating protein 1	RANGAP1
5.947	5.15505	Q13363;Q13363-2;D6RAX2;E7ESU7;E7EPF8;E9PGB1;H0Y8W7;Q5SQP8;P56545;P56545-3;P56545-2;H0Y9M9;E7EUB3;H0Y8U5;A0A087WYL1	Q13363;Q13363-2;D6RAX2;E7ESU7;E7EPF8	C-terminal-binding protein 1	CTBP1
5.946	5.15578	Q12907;D6RBV2;D6RDX1;D6RIU4;D6RBH1	Q12907;D6RBV2;D6RDX1;D6RIU4	Vesicular integral-membrane protein VIP36	LMAN2
5.945	4.80262	Q16881-4;A0A087WSW9;A0A087WSY9;Q16881-3;Q16881;F8W809;A0A182DWI3;Q16881-5;Q16881-2;Q16881-6;E9PIR7;E2QRB9;Q16881-7;E9PKD3;A0A0B4J225;E9PIZ5;E9PLT3;E9PKI4;E9PQI3;E9PRI8;E9PJU2	Q16881-4;A0A087WSW9;A0A087WSY9;Q16881-3;Q16881;F8W809;A0A182DWI3;Q16881-5;Q16881-2;Q16881-6;E9PIR7;E2QRB9;Q16881-7	Thioredoxin reductase 1, cytoplasmic	TXNRD1
5.943	4.86412	P41227;P41227-2;F8W808;C9JN83;C9JW55;Q9BSU3;H0Y8T0	P41227;P41227-2;F8W808;C9JN83	N-alpha-acetyltransferase 10	NAA10
5.94	5.53176	A0A0A0MRJ6;H7BY58;P22061;P22061-2;F6S8N6;F8WDT3;F8WAV5;F8WAX2;C9J0F2;H7C4X2	A0A0A0MRJ6;H7BY58;P22061;P22061-2;F6S8N6	Protein-L-isoaspartate O-methyltransferase;Protein-L-isoaspartate(D-aspartate) O-methyltransferase	PCMT1
5.939	5.43946	P24666;G5E9R5;P24666-4;P24666-3;F2Z2Q9	P24666;G5E9R5;P24666-4;P24666-3	Low molecular weight phosphotyrosine protein phosphatase	ACP1
5.939	5.38796	Q9ULC4;Q9ULC4-3;Q9ULC4-2	Q9ULC4;Q9ULC4-3;Q9ULC4-2	Malignant T-cell-amplified sequence 1	MCTS1
5.939	5.09511	Q99613;B5ME19;Q99613-2;H3BPE4;H3BPE3;H3BTY8	Q99613;B5ME19;Q99613-2	Eukaryotic translation initiation factor 3 subunit C;Eukaryotic translation initiation factor 3 subunit C-like protein	EIF3C;EIF3CL
5.938	4.35906	Q99436;Q5TBG5;Q99436-2	Q99436	Proteasome subunit beta type-7	PSMB7
5.938	5.22925	Q13547;Q5TEE2	Q13547	Histone deacetylase 1	HDAC1
5.938	4.56764	Q13162;H7C3T4;A6NJJ0;A6NG45	Q13162;H7C3T4	Peroxiredoxin-4	PRDX4
5.937	NaN	P61024;Q5T179;Q9BZU3	P61024;Q5T179	Cyclin-dependent kinases regulatory subunit 1;Cyclin-dependent kinases regulatory subunit	CKS1B
5.936	5.09977	O60925;E5RGS4;D6RGG5	O60925;E5RGS4	Prefoldin subunit 1	PFDN1
5.935	5.3598	J3KNF8;J3QR91	J3KNF8		CYB5B
5.935	5.20438	C9JLU1;P52434;P52434-4;P52434-3;P52434-2;P52434-5	C9JLU1;P52434;P52434-4;P52434-3	DNA-directed RNA polymerases I, II, and III subunit RPABC3	POLR2H
5.934	5.4218	Q9BZZ5-2;Q9BZZ5-5	Q9BZZ5-2;Q9BZZ5-5	Apoptosis inhibitor 5	API5
5.934	5.22955	E7EX17;P23588;P23588-2;F8VX11;F8VP89;F8VSC7;F8W0K0;F8VYE9;F8VRU1;REV__F8VX11;REV__P23588-2;REV__P23588;REV__E7EX17	E7EX17;P23588;P23588-2;F8VX11	Eukaryotic translation initiation factor 4B	EIF4B
5.933	5.48564	A0A0G2JIW1;P0DMV9;P0DMV8;P0DMV8-2;V9GZ37	A0A0G2JIW1;P0DMV9;P0DMV8;P0DMV8-2;V9GZ37	Heat shock 70 kDa protein 1B;Heat shock 70 kDa protein 1A	HSPA1B;HSPA1A
5.933	5.96459	P14317;E7EVW7;P14317-2;F8WDD5;F8WEZ6	P14317;E7EVW7	Hematopoietic lineage cell-specific protein	HCLS1
5.931	5.31622	P11912;M0QX61;P11912-2	P11912	B-cell antigen receptor complex-associated protein alpha chain	CD79A
5.931	5.39807	Q15459;Q15459-2;H7C1L2;F8WB66;F8WC79	Q15459;Q15459-2	Splicing factor 3A subunit 1	SF3A1
5.929	4.29567	O14929;O14929-2;F8W9G7;F8WEW1	O14929;O14929-2	Histone acetyltransferase type B catalytic subunit	HAT1
5.928	4.72798	P05023-4;P05023;P05023-3;P05023-2;Q5TC01;P20648;Q5TC02;Q5TC05	P05023-4;P05023;P05023-3;P05023-2	Sodium/potassium-transporting ATPase subunit alpha-1	ATP1A1
5.928	5.13842	Q16531;F5GY55;Q16531-2;F5H2L3;F5GWI0;F5GZY8;F5GYG8;F5H198	Q16531;F5GY55	DNA damage-binding protein 1	DDB1
5.927	5.71035	E9PKH8;P11836;P11836-2;E9PPL6	E9PKH8;P11836;P11836-2	B-lymphocyte antigen CD20	MS4A1
5.926	5.37853	O75533;H7C341;B4DGZ4;O75533-2;F8WC19	O75533	Splicing factor 3B subunit 1	SF3B1
5.926	2.86217	Q15758;M0QXM4;Q15758-3;Q15758-2;M0QX44	Q15758;M0QXM4;Q15758-3;Q15758-2	Neutral amino acid transporter B(0);Amino acid transporter	SLC1A5
5.925	5.57281	P61106;X6RFL8	P61106;X6RFL8	Ras-related protein Rab-14	RAB14
5.924	4.72054	P47897;P47897-2;B4DDN1;A0A0U1RQT0;C9J165;A0A0U1RQE9;A0A0U1RRI9;A0A0U1RQL2;A0A0U1RQM8;A0A0U1RQU2;F2Z2V6;A0A0U1RQC3	P47897;P47897-2;B4DDN1	Glutamine--tRNA ligase	QARS
5.923	5.13848	Q9UKD2	Q9UKD2	mRNA turnover protein 4 homolog	MRTO4
5.923	4.55473	O75506	O75506	Heat shock factor-binding protein 1	HSBP1
5.922	4.88715	Q13155;A8MU58	Q13155;A8MU58	Aminoacyl tRNA synthase complex-interacting multifunctional protein 2	AIMP2
5.921	5.17024	Q8WXF1;Q8WXF1-2;X6RDA4;A0A0U1RQF9	Q8WXF1;Q8WXF1-2	Paraspeckle component 1	PSPC1
5.92	5.39446	P47813;O14602;X6RAC9;A6NJH9	P47813;O14602;X6RAC9	Eukaryotic translation initiation factor 1A, X-chromosomal;Eukaryotic translation initiation factor 1A, Y-chromosomal	EIF1AX;EIF1AY
5.92	3.81159	E9PES6;E7ES08;E7EQU1;O15347	E9PES6;E7ES08;E7EQU1;O15347	High mobility group protein B3	HMGB3
5.92	4.83334	P30043;M0R192;M0QZL1	P30043;M0R192	Flavin reductase (NADPH)	BLVRB
5.919	5.88188	P51858;P51858-2;P51858-3	P51858;P51858-2;P51858-3	Hepatoma-derived growth factor	HDGF
5.917	5.19319	Q9UHV9	Q9UHV9	Prefoldin subunit 2	PFDN2
5.916	6.38681	P04233-2	P04233-2	HLA class II histocompatibility antigen gamma chain	CD74
5.916	5.60871	P61960;H0Y614;P61960-2	P61960;H0Y614;P61960-2	Ubiquitin-fold modifier 1	UFM1
5.916	4.40498	E7ETZ4;Q9Y6E2;Q75MG1;B5MCH7;E7EMS9;B5MCE7;C9JF98;Q9Y6E2-2;E9PFE3;F8WDX8;E9PFD4	E7ETZ4;Q9Y6E2;Q75MG1;B5MCH7;E7EMS9;B5MCE7	Basic leucine zipper and W2 domain-containing protein 2	BZW2
5.916	4.90828	Q96B49	Q96B49	Mitochondrial import receptor subunit TOM6 homolog	TOMM6
5.915	5.06956	P08579	P08579	U2 small nuclear ribonucleoprotein B	SNRPB2
5.915	4.63285	Q9BY44;Q9BY44-3;F8WAE5;Q9BY44-4;Q9BY44-2;H7C5R5;C9IZE1;H7C5Q3;F8WF18;F8WAT3	Q9BY44;Q9BY44-3;F8WAE5;Q9BY44-4;Q9BY44-2	Eukaryotic translation initiation factor 2A;Eukaryotic translation initiation factor 2A, N-terminally processed	EIF2A
5.913	4.77692	O00487;C9JW37	O00487	26S proteasome non-ATPase regulatory subunit 14	PSMD14
5.912	4.61073	P30520;Q8N142;Q8N142-2;G3V5D8;G3V232;S4R2Z1;G3V2N1	P30520	Adenylosuccinate synthetase isozyme 2	ADSS
5.912	4.66451	Q9UMX0;Q9UMX0-3;Q9UMX0-4;H0YDS0;H0YEZ9	Q9UMX0	Ubiquilin-1	UBQLN1
5.911	5.00554	Q12904;D6R937	Q12904	Aminoacyl tRNA synthase complex-interacting multifunctional protein 1;Endothelial monocyte-activating polypeptide 2	AIMP1
5.911	3.62663	P28072;A0A087X2I4;I3L3X7	P28072;A0A087X2I4	Proteasome subunit beta type-6;Proteasome subunit beta type	PSMB6
5.911	5.19788	Q9Y5B9;G3V5A4;G3V401;G3V2X0	Q9Y5B9	FACT complex subunit SPT16	SUPT16H
5.91	5.88648	P62312	P62312	U6 snRNA-associated Sm-like protein LSm6	LSM6
5.91	4.8217	C9JP00;A0A0A0MQX8;Q9NR56;Q9NR56-7;Q86VM6;C9JCX1;H7C4Y1;C9J4T8	C9JP00;A0A0A0MQX8;Q9NR56;Q9NR56-7;Q86VM6	Muscleblind-like protein 1	MBNL1
5.91	3.52847	P00813;F5GWI4;F5GXW0;F5GYD4	P00813;F5GWI4;F5GXW0	Adenosine deaminase	ADA
5.909	4.98737	Q9BS26	Q9BS26	Endoplasmic reticulum resident protein 44	ERP44
5.909	5.35661	Q9UBE0;M0QZS6;B3KNJ4;Q9UBE0-2;Q9UBE0-3;M0QX65;M0R054;M0QYM8;M0R286;M0R375;M0QYP2	Q9UBE0;M0QZS6;B3KNJ4;Q9UBE0-2;Q9UBE0-3;M0QX65	SUMO-activating enzyme subunit 1;SUMO-activating enzyme subunit 1, N-terminally processed	SAE1
5.908	3.69537	O75607	O75607	Nucleoplasmin-3	NPM3
5.906	4.10277	P49736;H0Y8E6;F8WDM3;C9JZ21;C9J013;H7C4N9	P49736;H0Y8E6	DNA replication licensing factor MCM2	MCM2
5.906	4.30044	P62253;I3L0Q0;I3L2Q4;I3L2H7;K7EPR7	P62253;I3L0Q0;I3L2Q4	Ubiquitin-conjugating enzyme E2 G1;Ubiquitin-conjugating enzyme E2 G1, N-terminally processed	UBE2G1
5.906	5.15324	O43242;O43242-2;H0YGV8;F5H8K4	O43242;O43242-2	26S proteasome non-ATPase regulatory subunit 3	PSMD3
5.905	4.17361	F8VU90;Q9NYL4-2;Q9NYL4;E9PAR0;H0YHM7	F8VU90;Q9NYL4-2;Q9NYL4	Peptidyl-prolyl cis-trans isomerase;Peptidyl-prolyl cis-trans isomerase FKBP11	FKBP11
5.904	3.67606	Q15637-5;Q15637-7;C9J792	Q15637-5;Q15637-7	Splicing factor 1	SF1
5.903	5.14273	P63218	P63218	Guanine nucleotide-binding protein G(I)/G(S)/G(O) subunit gamma-5	GNG5
5.901	4.36678	Q9UJU6;Q9UJU6-2;B4DDD6;H0Y5J4;Q9UJU6-6;Q9UJU6-5;Q9UJU6-4;F8WBG8;F8WC20;F8WBB2;F8WFE1;F2Z2V3;F8WB73;F8WCK3;F2Z3E3;H7C111	Q9UJU6;Q9UJU6-2;B4DDD6;H0Y5J4;Q9UJU6-6;Q9UJU6-5;Q9UJU6-4	Drebrin-like protein	DBNL
5.899	4.78215	O60888-3;O60888;O60888-2;C9IZG4;C9IZQ5	O60888-3;O60888;O60888-2;C9IZG4	Protein CutA	CUTA
5.899	4.95875	P26885;F5H0N4	P26885;F5H0N4	Peptidyl-prolyl cis-trans isomerase FKBP2;Peptidyl-prolyl cis-trans isomerase	FKBP2
5.897	5.5537	A0A1W2PPZ5;P23193;A0A1W2PRL9;P23193-2;E5RIS7;B7Z4S1;E5RJ93;E5RK46;A0A1W2PS15;E5RFI1;A0A1W2PPV7;O75764	A0A1W2PPZ5;P23193;A0A1W2PRL9;P23193-2	Transcription elongation factor A protein 1	TCEA1
5.897	3.86759	Q14566	Q14566	DNA replication licensing factor MCM6	MCM6
5.897	5.22245	Q9UBT2;Q9UBT2-2;K7EPL2;K7ESK7;U3KQ93;U3KQ55;K7ES38	Q9UBT2;Q9UBT2-2	SUMO-activating enzyme subunit 2	UBA2
5.896	5.95826	P13804;H0YLU7;P13804-2;H0YK49;H0YNX6;H0YKF0;H0YL12;H0YL83;J3KN60;H0YM12	P13804;H0YLU7;P13804-2;H0YK49;H0YNX6;H0YKF0;H0YL12	Electron transfer flavoprotein subunit alpha, mitochondrial	ETFA
5.895	5.68445	O60493;O60493-2;O60493-3	O60493;O60493-2;O60493-3	Sorting nexin-3	SNX3
5.893	4.39108	Q9UG63;Q9UG63-2;C9JHK9;C9JZV3	Q9UG63;Q9UG63-2;C9JHK9;C9JZV3	ATP-binding cassette sub-family F member 2	ABCF2
5.892	4.58768	Q14232;F5H0D0;Q14232-2;H0YGG4	Q14232;F5H0D0;Q14232-2;H0YGG4	Translation initiation factor eIF-2B subunit alpha	EIF2B1
5.892	4.7562	Q05519-2;Q5T760;B4DWT1;S4R3C4	Q05519-2;Q5T760	Serine/arginine-rich splicing factor 11	SRSF11
5.89	4.6185	P46976-2;P46976;C9JQ42;G5E9W8;P46976-3;C9J8R8;C9J7C7	P46976-2;P46976;C9JQ42;G5E9W8;P46976-3	Glycogenin-1	GYG1
5.89	4.86962	Q9UK76;J3KT51;Q9UK76-2;Q9UK76-3;J3KSH8;F2Z3M5	Q9UK76;J3KT51;Q9UK76-2;Q9UK76-3	Hematological and neurological expressed 1 protein;Hematological and neurological expressed 1 protein, N-terminally processed	HN1
5.89	4.88593	Q92598;Q92598-2;Q92598-4;Q92598-3;A0A0A0MSM0;Q5TBM3;R4GN69	Q92598;Q92598-2;Q92598-4;Q92598-3;A0A0A0MSM0	Heat shock protein 105 kDa	HSPH1
5.89	5.03991	Q99986;H0YJ50;H0YJJ9	Q99986;H0YJ50	Serine/threonine-protein kinase VRK1	VRK1
5.889	5.06946	O14980;C9JKM9;C9J673;C9IZS4;C9JQ02;C9JV99;F8WF71;C9IYM2;H7BZC5;C9JF49	O14980	Exportin-1	XPO1
5.889	5.0603	J3KQ32;Q9NTK5;Q9NTK5-3;Q9NTK5-2;C9JCJ9;C9JTK6	J3KQ32;Q9NTK5;Q9NTK5-3;Q9NTK5-2	Obg-like ATPase 1	OLA1
5.889	4.5789	C9J406;H7C463	C9J406;H7C463		IMMT
5.889	5.11742	Q9UNM6;A0A087WUL9;Q9UNM6-2;J3KNQ3;E9PL38;H0YD73;E9PQG3;E9PPD2;F8W8J6	Q9UNM6;A0A087WUL9;Q9UNM6-2;J3KNQ3;E9PL38	26S proteasome non-ATPase regulatory subunit 13	PSMD13
5.889	5.45161	P78527;P78527-2;F5GX40;H0YG84	P78527;P78527-2	DNA-dependent protein kinase catalytic subunit	PRKDC
5.888	5.56181	P50213;H0YL72;P50213-2;H0YMU3;H0YLI6;H0YKD0;H0YNF5;H0YM64;H0YM46;Q68D72;H0YLF8;H0YNF8;H0YL05	P50213;H0YL72;P50213-2;H0YMU3;H0YLI6	Isocitrate dehydrogenase [NAD] subunit alpha, mitochondrial	IDH3A
5.887	2.69919	P31350;P31350-2;C9JXC1	P31350;P31350-2;C9JXC1	Ribonucleoside-diphosphate reductase subunit M2	RRM2
5.886	3.92795	P37268;E9PNM1;A0A1W2PQ47;P37268-2;P37268-3;P37268-4;P37268-5;E9PS69;E9PJG4;E9PQ90;E9PNJ2;E9PSH1	P37268;E9PNM1;A0A1W2PQ47;P37268-2;P37268-3;P37268-4;P37268-5	Squalene synthase	FDFT1
5.886	5.37718	J3KR44;Q96FW1;F5GYN4;F5H6Q1;F5GYJ8;F5H3F0;Q96FW1-2	J3KR44;Q96FW1;F5GYN4;F5H6Q1;F5GYJ8;F5H3F0	Ubiquitin thioesterase OTUB1	OTUB1
5.885	NaN	P29692-4;E9PK06	P29692-4
5.885	5.65532	Q9BV40;B8ZZT4;C9JXZ5	Q9BV40;B8ZZT4	Vesicle-associated membrane protein 8	VAMP8
5.883	5.36138	P49755;G3V2K7	P49755	Transmembrane emp24 domain-containing protein 10	TMED10
5.883	5.56256	P14550;Q5T621;V9GYP9;V9GYG2	P14550;Q5T621	Alcohol dehydrogenase [NADP(+)]	AKR1A1
5.882	5.66693	Q9P0L0;J3QKM9	Q9P0L0	Vesicle-associated membrane protein-associated protein A	VAPA
5.881	5.19024	Q16630-2;F8WJN3;Q16630-3;Q16630;F8W084	Q16630-2;F8WJN3;Q16630-3;Q16630	Cleavage and polyadenylation specificity factor subunit 6	CPSF6
5.879	4.87102	P50579;P50579-3;G3V1U3;F8VSC4	P50579;P50579-3;G3V1U3	Methionine aminopeptidase 2	METAP2
5.878	4.95634	Q9NP97;B1AKR6;Q8TF09;H3BQI1;H3BNG9;H3BPA0;Q7Z4M1;Q9NP97-2	Q9NP97;B1AKR6	Dynein light chain roadblock-type 1	DYNLRB1
5.878	5.54738	O43447;C9JQD4;O43447-2;H0YEL5;A6NM32	O43447;C9JQD4;O43447-2;H0YEL5	Peptidyl-prolyl cis-trans isomerase H;Peptidyl-prolyl cis-trans isomerase	PPIH
5.877	4.82318	P30405;R4GN99;P30405-2;H0Y548	P30405	Peptidyl-prolyl cis-trans isomerase F, mitochondrial	PPIF
5.877	NaN	P32322;E2QRB3;P32322-3;P32322-2;J3KQ22;J3QL24;J3QLK9;J3QL32;J3QKT4;J3QL23;J3QRZ0;J3KTA8;J3QKT3;J3QR88;J3KSA9	P32322;E2QRB3;P32322-3;P32322-2;J3KQ22;J3QL24	Pyrroline-5-carboxylate reductase 1, mitochondrial;Pyrroline-5-carboxylate reductase	PYCR1
5.876	4.90408	Q15428;K7EMT0	Q15428	Splicing factor 3A subunit 2	SF3A2
5.876	4.63672	Q9UN86-2	Q9UN86-2	Ras GTPase-activating protein-binding protein 2	G3BP2
5.875	4.48465	Q9Y221;Q9Y221-2;J3QLW7;J3QRD6;J3QRR4	Q9Y221;Q9Y221-2;J3QLW7	60S ribosome subunit biogenesis protein NIP7 homolog	NIP7
5.874	5.07346	A0A087WV05;Q99417;A0A0D9SEI7	A0A087WV05;Q99417	C-Myc-binding protein	MYCBP
5.873	3.46153	P00374;B4DM58;P00374-2;C9JJ68;Q86XF0	P00374;B4DM58;P00374-2	Dihydrofolate reductase	DHFR
5.872	5.30477	P27694;I3L4R8;I3L524;I3L2M5	P27694;I3L4R8	Replication protein A 70 kDa DNA-binding subunit;Replication protein A 70 kDa DNA-binding subunit, N-terminally processed	RPA1
5.872	5.20873	P48444;B0YIW6;P48444-2;Q6P1Q5;E9PK34	P48444;B0YIW6;P48444-2	Coatomer subunit delta	ARCN1
5.872	4.98044	Q9NVI7-2;Q9NVI7;H0Y2W2;Q9NVI7-3;Q5SV16	Q9NVI7-2;Q9NVI7;H0Y2W2;Q9NVI7-3	ATPase family AAA domain-containing protein 3A	ATAD3A
5.872	1.74917	P23921;E9PL69;E9PP77;H0YCY7	P23921;E9PL69	Ribonucleoside-diphosphate reductase large subunit	RRM1
5.871	5.21021	P15927;P15927-2;P15927-3;Q5TEJ7;Q5TEJ0	P15927;P15927-2;P15927-3;Q5TEJ7	Replication protein A 32 kDa subunit	RPA2
5.871	5.65816	P00387-2;P00387;P00387-3;B1AHF3	P00387-2;P00387;P00387-3;B1AHF3	NADH-cytochrome b5 reductase 3;NADH-cytochrome b5 reductase 3 membrane-bound form;NADH-cytochrome b5 reductase 3 soluble form	CYB5R3
5.871	NaN	Q8WUM4-2	Q8WUM4-2	Programmed cell death 6-interacting protein	PDCD6IP
5.87	3.81212	P04181;P04181-2	P04181;P04181-2	Ornithine aminotransferase, mitochondrial;Ornithine aminotransferase, hepatic form;Ornithine aminotransferase, renal form	OAT
5.869	4.72148	P42167;G5E972;P42167-3	P42167;G5E972;P42167-3	Lamina-associated polypeptide 2, isoforms beta/gamma;Thymopoietin;Thymopentin	TMPO
5.868	5.47282	Q9NUQ9;E5RI16;A0A1W2PRQ0;E5RJL8;A0A087X178;Q9NUQ9-2;E5RJE1;E5RIR8;E5RGI7;E5RFS4;E5RHU5;E5RK61;E5RK81;E5RH75;Q9H0Q0	Q9NUQ9;E5RI16	Protein FAM49B	FAM49B
5.867	2.94617	P62714;E5RHC1;H0YC23;E7ESG8;E5RFI3;E5RHP4;H0YBN9;E5RJX4	P62714;E5RHC1	Serine/threonine-protein phosphatase 2A catalytic subunit beta isoform;Serine/threonine-protein phosphatase	PPP2CB
5.866	5.89224	Q99798;A2A274	Q99798;A2A274	Aconitate hydratase, mitochondrial	ACO2
5.866	5.73785	P38117;P38117-2;M0QY67	P38117;P38117-2;M0QY67	Electron transfer flavoprotein subunit beta	ETFB
5.866	4.16768	Q5U5X0;D6R994	Q5U5X0	Complex III assembly factor LYRM7	LYRM7
5.862	4.58207	P60983;G3V4P8;G3V3X4	P60983;G3V4P8	Glia maturation factor beta	GMFB
5.86	5.0186	Q01813;Q01813-2;B1APP6;B1APP8;H0Y757;Q5VSR5;V9GY25;V9GYV7;H0Y3Y3	Q01813;Q01813-2	ATP-dependent 6-phosphofructokinase, platelet type	PFKP
5.859	NaN	P33552	P33552	Cyclin-dependent kinases regulatory subunit 2	CKS2
5.859	5.31687	Q14240;Q14240-2;E7EQG2;J3KSN7;E7EMV8;E9PBH4;C9JUF0;F8WE11	Q14240;Q14240-2;E7EQG2	Eukaryotic initiation factor 4A-II;Eukaryotic initiation factor 4A-II, N-terminally processed	EIF4A2
5.859	5.86238	P40939;H0YFD6;P40939-2	P40939	Trifunctional enzyme subunit alpha, mitochondrial;Long-chain enoyl-CoA hydratase;Long chain 3-hydroxyacyl-CoA dehydrogenase	HADHA
5.859	4.99174	E7EQ69;C9J5J3;C9JZU6	E7EQ69		NAA50
5.858	5.49984	Q9Y3I0	Q9Y3I0	tRNA-splicing ligase RtcB homolog	RTCB
5.858	6.27194	P05204	P05204	Non-histone chromosomal protein HMG-17	HMGN2
5.855	4.14258	O43252;O95340;O95340-2	O43252	Bifunctional 3-phosphoadenosine 5-phosphosulfate synthase 1;Sulfate adenylyltransferase;Adenylyl-sulfate kinase	PAPSS1
5.854	5.37526	Q9NS69	Q9NS69	Mitochondrial import receptor subunit TOM22 homolog	TOMM22
5.853	4.67863	O00505;H0Y4S9	O00505	Importin subunit alpha-4	KPNA3
5.853	4.72584	Q9P2J5;Q9P2J5-2;Q9P2J5-3;A0A087WXY1	Q9P2J5;Q9P2J5-2	Leucine--tRNA ligase, cytoplasmic	LARS
5.853	5.77167	Q14847;Q14847-2;C9J9W2;Q14847-3;F6S2S5;K7ESD6;J3KSN1;O76041-2	Q14847;Q14847-2;C9J9W2;Q14847-3	LIM and SH3 domain protein 1	LASP1
5.853	5.52819	A2ACR1;P28065-2;P28065;A0A0G2JJA7;A2ACR0;A0A0G2JJQ0;A0A0G2JJ13;A0A0G2JHI2	A2ACR1;P28065-2;P28065;A0A0G2JJA7;A2ACR0	Proteasome subunit beta type;Proteasome subunit beta type-9	PSMB9
5.851	5.84871	H0UI06;P14406;D6R9C3;D6RIE3;D6RGV5	H0UI06;P14406;D6R9C3;D6RIE3;D6RGV5	Cytochrome c oxidase subunit 7A2, mitochondrial	COX7A2
5.851	4.67127	Q13451;Q13451-2	Q13451	Peptidyl-prolyl cis-trans isomerase FKBP5;Peptidyl-prolyl cis-trans isomerase FKBP5, N-terminally processed	FKBP5
5.85	5.44894	A6NMQ3;Q5T5H1;O43768-2;O43768;O43768-9;O43768-3;O43768-4;A0A1W2PRU0;O43768-8;O43768-6;O43768-5;O43768-7	A6NMQ3;Q5T5H1;O43768-2;O43768;O43768-9;O43768-3;O43768-4;A0A1W2PRU0;O43768-8;O43768-6;O43768-5;O43768-7	Alpha-endosulfine	ENSA
5.85	3.7764	O00762;O00762-2;O00762-3;O00762-4;A0A087WVK1;A0A0A0MSE8;K4DI81	O00762;O00762-2;O00762-3;O00762-4	Ubiquitin-conjugating enzyme E2 C	UBE2C
5.85	4.12414	P17812;P17812-2	P17812;P17812-2	CTP synthase 1	CTPS1
5.85	6.0793	Q8NHW5	Q8NHW5	60S acidic ribosomal protein P0-like	RPLP0P6
5.849	6.47487	P05114;A6NEL0;F2Z2W6;F2Z2Y5;H7BXJ5;A6NL93	P05114;A6NEL0;F2Z2W6;F2Z2Y5;H7BXJ5	Non-histone chromosomal protein HMG-14	HMGN1
5.848	5.0637	Q7L1Q6;Q7L1Q6-4;Q7L1Q6-3;Q7L1Q6-2;C9IZ80;C9JFN4;C9J188;C9JWF5;H0Y503;C9JV57	Q7L1Q6;Q7L1Q6-4;Q7L1Q6-3;Q7L1Q6-2;C9IZ80	Basic leucine zipper and W2 domain-containing protein 1	BZW1
5.847	5.11651	P67870;Q5SRQ6;Q5SRQ3;N0E472;A0A0G2JM12;N0E644;A0A0G2JM58	P67870;Q5SRQ6;Q5SRQ3;N0E472;A0A0G2JM12	Casein kinase II subunit beta	CSNK2B;CSNK2B-LY6G5B-1181;CSNK2B-LY6G5B--991
5.847	5.55861	Q9Y6C9	Q9Y6C9	Mitochondrial carrier homolog 2	MTCH2
5.847	4.40757	Q13867;J3KSD8;K7ES02;K7ESE8;J3KS79;K7ENH5;K7EMJ3	Q13867;J3KSD8;K7ES02;K7ESE8	Bleomycin hydrolase	BLMH
5.847	5.4023	O14745;O14745-2;J3QRP6;J3QRA3	O14745;O14745-2	Na(+)/H(+) exchange regulatory cofactor NHE-RF1	SLC9A3R1
5.846	5.78332	P55084-2;P55084;F5GZQ3;B5MD38;C9JEY0;C9JE81;C9K0M0	P55084-2;P55084;F5GZQ3;B5MD38	Trifunctional enzyme subunit beta, mitochondrial;3-ketoacyl-CoA thiolase	HADHB
5.845	5.81267	Q14141;B1AMS2;Q14141-2;Q14141-4;Q14141-3	Q14141;B1AMS2;Q14141-2;Q14141-4	Septin-6	2018-09-06
5.845	5.02147	P06730;P06730-2;D6RBW1;P06730-3;H0Y8J7;D6RFJ3;D6RHE2;H0Y8X3;A6NMX2	P06730;P06730-2;D6RBW1;P06730-3	Eukaryotic translation initiation factor 4E	EIF4E
5.845	5.78298	Q9Y5L4;K7EIT2	Q9Y5L4;K7EIT2	Mitochondrial import inner membrane translocase subunit Tim13	TIMM13
5.844	NaN	Q8NFX7-2;Q8NFX7;Q8NFX7-3;F8VZZ2	Q8NFX7-2;Q8NFX7	Syntaxin-binding protein 6	STXBP6
5.843	4.98617	Q02750;Q02750-2;H3BRW9	Q02750;Q02750-2	Dual specificity mitogen-activated protein kinase kinase 1	MAP2K1
5.842	2.8393	O00154-4;O00154-6;O00154-7;O00154;O00154-5;K7EKP8;O00154-2;O00154-3	O00154-4;O00154-6;O00154-7;O00154;O00154-5;K7EKP8;O00154-2;O00154-3	Cytosolic acyl coenzyme A thioester hydrolase	ACOT7
5.842	5.16844	Q9BRA2;I3L2R6;I3L0K2;I3L3M7	Q9BRA2;I3L2R6;I3L0K2;I3L3M7	Thioredoxin domain-containing protein 17	TXNDC17
5.839	4.66351	Q13526;K7EN45;K7EMU7;O15428	Q13526;K7EN45;K7EMU7	Peptidyl-prolyl cis-trans isomerase NIMA-interacting 1	PIN1
5.839	4.61425	Q9UHY7;D6RA00;A0A0C4DGY8;Q9UHY7-2	Q9UHY7;D6RA00;A0A0C4DGY8;Q9UHY7-2	Enolase-phosphatase E1	ENOPH1
5.838	5.34821	Q96DI7;Q96DI7-2;Q9NSS8	Q96DI7;Q96DI7-2	U5 small nuclear ribonucleoprotein 40 kDa protein	SNRNP40
5.838	5.11739	Q99829;B0QZ18;F2Z2V0;A6PVH9;E7ENH5;Q5JX58;Q5JX59;Q5JX60;Q5JX44;Q5JX56;Q5JX45;Q5JX55;Q5JX61;Q5JX52;Q5JX54;Q5JX57;E7EV27;H0Y524;Q5JX53	Q99829;B0QZ18;F2Z2V0;A6PVH9;E7ENH5;Q5JX58;Q5JX59;Q5JX60;Q5JX44;Q5JX56;Q5JX45;Q5JX55;Q5JX61;Q5JX52	Copine-1	CPNE1
5.836	2.5355	P31323	P31323	cAMP-dependent protein kinase type II-beta regulatory subunit	PRKAR2B
5.836	4.94132	Q99460;A0A087WW66;Q99460-2;H7C378;C9J9M4;H7BZR6;F8WCE3	Q99460;A0A087WW66;Q99460-2	26S proteasome non-ATPase regulatory subunit 1	PSMD1
5.836	5.44491	Q86UX7-2;Q86UX7;F5H1C6;H0YFT5;F5H3I6;G3V1L6;Q9BQL6-3;Q9BQL6	Q86UX7-2;Q86UX7;F5H1C6	Fermitin family homolog 3	FERMT3
5.835	5.1193	Q14699;G3XAJ6;C9JHG2;C9JRN3;C9JWQ9;F8WAR1;U3KPZ2	Q14699;G3XAJ6;C9JHG2	Raftlin	RFTN1
5.835	5.67166	K7ELL7;P14314-2;P14314;K7EPW7;A0A0C4DGP4;K7EKX1;K7EJ70;K7EIP3	K7ELL7;P14314-2;P14314	Glucosidase 2 subunit beta	PRKCSH
5.834	5.33097	Q92499;F1T0B3;A0A087X2G1;Q92499-3;Q92499-2	Q92499;F1T0B3;A0A087X2G1;Q92499-3;Q92499-2	ATP-dependent RNA helicase DDX1	DDX1
5.833	5.54447	P62310	P62310	U6 snRNA-associated Sm-like protein LSm3	LSM3
5.833	5.39392	Q15029-2;Q15029;Q15029-3;K7EP67;K7EIT3;K7EIV5	Q15029-2;Q15029;Q15029-3	116 kDa U5 small nuclear ribonucleoprotein component	EFTUD2
5.833	4.92555	O00232;O00232-2;J3KTJ5;J3KSK1	O00232;O00232-2	26S proteasome non-ATPase regulatory subunit 12	PSMD12
5.833	5.0436	Q9Y3C8	Q9Y3C8	Ubiquitin-fold modifier-conjugating enzyme 1	UFC1
5.833	4.41218	Q99757;M0QXH0;F8WDN2	Q99757;M0QXH0	Thioredoxin, mitochondrial	TXN2
5.83	5.27408	P20042	P20042	Eukaryotic translation initiation factor 2 subunit 2	EIF2S2
5.829	4.58579	Q9Y2L1;Q9Y2L1-2;G3V1J5;F2Z2C0	Q9Y2L1;Q9Y2L1-2;G3V1J5;F2Z2C0	Exosome complex exonuclease RRP44	DIS3
5.827	4.67054	O14744;O14744-2;O14744-5;O14744-3;O14744-4;H0YJX6;G3V580;G3V2L6;G3V5L5;G3V2X6;C9JSX3;H0YJ77;G3V5T6;H0YJD3;H7BZ44;G3V507;G3V2F5;H0YJY6	O14744;O14744-2;O14744-5;O14744-3;O14744-4	Protein arginine N-methyltransferase 5;Protein arginine N-methyltransferase 5, N-terminally processed	PRMT5
5.827	5.35356	P47755;F8W9N7;A0A0D9SET8;C9JUG7;P47755-2;F8WED3	P47755;F8W9N7;A0A0D9SET8;C9JUG7;P47755-2	F-actin-capping protein subunit alpha-2	CAPZA2
5.826	5.44731	P09669	P09669	Cytochrome c oxidase subunit 6C	COX6C
5.825	1.63849	Q9NTJ3;E9PD53;Q9NTJ3-2;C9JR83;C9J9E4;C9J578;C9JVD8;C9JWF0;C9IYK2;C9JJ64;F8WCB7	Q9NTJ3;E9PD53;Q9NTJ3-2	Structural maintenance of chromosomes protein 4;Structural maintenance of chromosomes protein	SMC4
5.825	5.16618	Q9Y678;H0Y8X7;D6RG17;H0Y8G2	Q9Y678	Coatomer subunit gamma-1	COPG1
5.824	5.70824	Q9Y490	Q9Y490	Talin-1	TLN1
5.823	5.87957	Q16666;Q16666-2;Q16666-6;Q16666-3;A0A0A0MRB1;H3BR88;H3BM18;X6RHM1;H3BVE6;X6RHR0;Q6K0P9-6;Q6K0P9-5;Q6K0P9-4;Q6K0P9-3;Q6K0P9-2;Q6K0P9;H3BR65	Q16666;Q16666-2;Q16666-6;Q16666-3	Gamma-interferon-inducible protein 16	IFI16
5.823	4.86914	A0A087WY55;Q9NP79;Q5TGM0;Q9NP79-2	A0A087WY55;Q9NP79;Q5TGM0;Q9NP79-2	Vacuolar protein sorting-associated protein VTA1 homolog	VTA1
5.822	3.58994	H3BTL1;Q9GZQ8;A6NCE7;H3BTE7;Q9H492;Q9H492-2	H3BTL1;Q9GZQ8;A6NCE7	Microtubule-associated proteins 1A/1B light chain 3B;Microtubule-associated proteins 1A/1B light chain 3 beta 2	MAP1LC3B;MAP1LC3B2
5.822	5.83055	A0A024R1R8;Q9Y2S6	A0A024R1R8;Q9Y2S6	Translation machinery-associated protein 7	hCG_2014768;TMA7
5.821	4.92379	Q96CT7;M0R2F5	Q96CT7;M0R2F5	Coiled-coil domain-containing protein 124	CCDC124
5.82	5.16621	Q9Y3B4	Q9Y3B4	Splicing factor 3B subunit 6	SF3B6
5.819	1.7242	P11388;P11388-2;P11388-3;P11388-4;J3KTB7;J3QR57	P11388;P11388-2;P11388-3;P11388-4	DNA topoisomerase 2-alpha	TOP2A
5.817	5.00608	R4GMR5;P48556;K7EJR3;K7EJC1;K7ERW6;K7ENY6	R4GMR5;P48556;K7EJR3	26S proteasome non-ATPase regulatory subunit 8	PSMD8
5.817	5.42256	P28062;X5D2R7;Q5JNW7;A0A140T998;P28062-2	P28062;X5D2R7;Q5JNW7;A0A140T998;P28062-2	Proteasome subunit beta type-8;Proteasome subunit beta type	PSMB8;PSM8
5.816	5.2839	P16885;A0A0A0MRF9;H3BQV5;H3BPZ3	P16885;A0A0A0MRF9	1-phosphatidylinositol 4,5-bisphosphate phosphodiesterase gamma-2;Phosphoinositide phospholipase C	PLCG2
5.815	5.10992	P62875	P62875	DNA-directed RNA polymerases I, II, and III subunit RPABC5	POLR2L
5.814	4.71888	O75534;O75534-4;E9PLD4;E9PKN4	O75534;O75534-4	Cold shock domain-containing protein E1	CSDE1
5.814	4.87133	P35250;P35250-2;A0A087WVY3;H7C5P4;F8WC37;H7C5G4;H7C596;H7C5Q7;H7C5A0;H7C5P1;H7C5S7;F8WDC9	P35250;P35250-2;A0A087WVY3	Replication factor C subunit 2	RFC2
5.813	5.12721	P36871;P36871-2;P36871-3	P36871;P36871-2;P36871-3	Phosphoglucomutase-1	PGM1
5.813	5.84881	P14854;K7EQD3	P14854	Cytochrome c oxidase subunit 6B1	COX6B1
5.813	5.67182	P14678-2;P14678;P14678-3;J3QLE5;P63162;P63162-2;J3KRY3;S4R3P3	P14678-2;P14678;P14678-3;J3QLE5;P63162;P63162-2	Small nuclear ribonucleoprotein-associated proteins B and B;Small nuclear ribonucleoprotein-associated protein N	SNRPB;SNRPN
5.81	5.27222	P54920;M0R0Y2;M0R2M1;M0R058;M0R0I4;M0R213;M0R027;M0QZM9;M0QZN5;M0R031	P54920;M0R0Y2;M0R2M1	Alpha-soluble NSF attachment protein	NAPA
5.81	5.74961	Q96IX5	Q96IX5	Up-regulated during skeletal muscle growth protein 5	USMG5
5.809	4.81925	Q9NPJ3;Q9NPJ3-2	Q9NPJ3;Q9NPJ3-2	Acyl-coenzyme A thioesterase 13;Acyl-coenzyme A thioesterase 13, N-terminally processed	ACOT13
5.807	4.83973	Q3ZCM7;A0A075B736;Q5SQY0	Q3ZCM7;A0A075B736;Q5SQY0	Tubulin beta-8 chain	TUBB8
5.806	5.39168	A0A0C4DFU2;P04179;P04179-4;F5H4R2;F5GYZ5;F5H3C5;A0A0C4DFU1;P04179-2;A0A0C4DG56;P04179-3;G8JLJ2;G5E9P6;F5GXZ9	A0A0C4DFU2;P04179;P04179-4;F5H4R2;F5GYZ5;F5H3C5;A0A0C4DFU1;P04179-2;A0A0C4DG56;P04179-3	Superoxide dismutase;Superoxide dismutase [Mn], mitochondrial	SOD2
5.806	5.41956	O60869;O60869-2;O60869-3	O60869;O60869-2;O60869-3	Endothelial differentiation-related factor 1	EDF1
5.806	5.0661	Q9BT78;D6RFN0;D6RAX7;Q9BT78-2;D6RD63;D6REK7	Q9BT78;D6RFN0;D6RAX7;Q9BT78-2;D6RD63	COP9 signalosome complex subunit 4	COPS4
5.806	5.41013	Q92882	Q92882	Osteoclast-stimulating factor 1	OSTF1
5.805	NaN	O00425;O00425-2;F8WD15;F8W930;Q9Y6M1-5;Q9Y6M1-6;Q9Y6M1-3;Q9Y6M1-4;Q9Y6M1-1;Q9Y6M1	O00425;O00425-2	Insulin-like growth factor 2 mRNA-binding protein 3	IGF2BP3
5.804	5.04667	P63000;P63000-2	P63000;P63000-2	Ras-related C3 botulinum toxin substrate 1	RAC1
5.803	5.16218	Q00688;G3V5F2	Q00688	Peptidyl-prolyl cis-trans isomerase FKBP3	FKBP3
5.802	4.97649	Q15102;M0R389;M0R1K3;M0QZT2;M0QXS6;M0R323	Q15102;M0R389;M0R1K3;M0QZT2	Platelet-activating factor acetylhydrolase IB subunit gamma	PAFAH1B3
5.802	5.52434	P31947;P31947-2	P31947;P31947-2	14-3-3 protein sigma	SFN
5.8	4.82648	P37198;M0QXN5;M0QX10;M0QYY0;M0QX13;M0QZL5;M0R1S1;M0QX64;M0R302	P37198;M0QXN5	Nuclear pore glycoprotein p62	NUP62
5.8	5.50163	P47985	P47985	Cytochrome b-c1 complex subunit Rieske, mitochondrial;Cytochrome b-c1 complex subunit 11	UQCRFS1
5.8	5.20991	O60884;A0A087WT48;I3L320	O60884	DnaJ homolog subfamily A member 2	DNAJA2
5.8	4.13067	O14530;O14530-2;B8ZZX4;F8WCJ3;F8WBV5;G3XAJ4	O14530;O14530-2;B8ZZX4;F8WCJ3	Thioredoxin domain-containing protein 9	TXNDC9
5.8	5.09627	O60264	O60264	SWI/SNF-related matrix-associated actin-dependent regulator of chromatin subfamily A member 5	SMARCA5
5.798	5.25444	Q16563-2;C9JYN0;Q16563;H7C4J8;A0A0U1RQT9	Q16563-2;C9JYN0;Q16563	Synaptophysin-like protein 1	SYPL1
5.798	NaN	Q9H8S9;Q9H8S9-2	Q9H8S9;Q9H8S9-2	MOB kinase activator 1A	MOB1A
5.797	4.50784	P42574;A8MVM1;C9JXR7	P42574;A8MVM1	Caspase-3;Caspase-3 subunit p17;Caspase-3 subunit p12	CASP3
5.797	5.2911	P07954-2;P07954	P07954-2;P07954	Fumarate hydratase, mitochondrial	FH
5.795	4.6503	P04792;F8WE04;C9J3N8	P04792	Heat shock protein beta-1	HSPB1
5.795	5.63674	Q9UI08-2;Q9UI08-5;G3V3G2;G3V535;A0A087WYI2	Q9UI08-2;Q9UI08-5
5.794	4.72787	P32519;A0A0U1RRL5;P32519-2;Q5T9E7;A0A0D9SG85;A0A087WU18;Q99607	P32519;A0A0U1RRL5;P32519-2	ETS-related transcription factor Elf-1	ELF1
5.794	5.86467	Q9Y2X3;H7BZ72;F8WED0	Q9Y2X3	Nucleolar protein 58	NOP58
5.793	5.00579	Q92979;V9GYP5;A0A087WWQ2;A0A087WVM7	Q92979;V9GYP5;A0A087WWQ2;A0A087WVM7	Ribosomal RNA small subunit methyltransferase NEP1	EMG1
5.792	4.98955	P55036;H0Y3Y9	P55036	26S proteasome non-ATPase regulatory subunit 4	PSMD4
5.791	3.79725	Q9BQ15;C9JT95;C9JMP5;F8WAF5;Q9BQ15-2;Q96AH0-2	Q9BQ15;C9JT95;C9JMP5	SOSS complex subunit B1	NABP2
5.79	5.08801	Q9ULV4;Q9ULV4-2;Q9ULV4-3;B4E3S0;H0YHL7;F8W1H8;F8VUX3;F8VSA4;F8VRE9;F8VTT6;F8VVB7;F8VV53;J3QLV6;J3KSS5;Q6QEF8-4;Q6QEF8-3;Q6QEF8-2;Q6QEF8-5;Q6QEF8	Q9ULV4;Q9ULV4-2;Q9ULV4-3;B4E3S0;H0YHL7	Coronin-1C;Coronin	CORO1C
5.79	4.04873	K7EM38;J3KT65;F8WCH0	K7EM38;J3KT65		ACTG1
5.789	NaN	P04818;P04818-2;P04818-3	P04818;P04818-2;P04818-3	Thymidylate synthase	TYMS
5.789	NaN	P56381;Q5VTU8	P56381;Q5VTU8	ATP synthase subunit epsilon, mitochondrial;ATP synthase subunit epsilon-like protein, mitochondrial	ATP5E;ATP5EP2
5.789	5.68656	P11177;P11177-3;P11177-2;C9J634;F8WF02	P11177;P11177-3;P11177-2;C9J634	Pyruvate dehydrogenase E1 component subunit beta, mitochondrial	PDHB
5.788	5.04257	P61163;R4GMT0;A0A1B0GVS3	P61163;R4GMT0	Alpha-centractin	ACTR1A
5.787	4.96026	P00846	P00846	ATP synthase subunit a	MT-ATP6
5.786	5.70613	P41240;H3BUM9;H3BU69;H3BN15;K7ENL8;K7ES68;K7EQY5;P42679-3;P42679;P42679-2	P41240	Tyrosine-protein kinase CSK	CSK		+
5.785	5.93197	P62136;P62136-3;E9PMD7;F5H1L6;F5H037	P62136;P62136-3;E9PMD7	Serine/threonine-protein phosphatase PP1-alpha catalytic subunit;Serine/threonine-protein phosphatase	PPP1CA
5.784	5.1209	Q13951-2;J3KTD8	Q13951-2	Core-binding factor subunit beta	CBFB
5.784	5.13031	H7BXD5;P28676;H7C2Z6;C9JIZ3;C9JWQ8;C9JV47	H7BXD5;P28676;H7C2Z6	Grancalcin	GCA
5.783	5.49477	P35754	P35754	Glutaredoxin-1	GLRX
5.783	4.52775	Q8WUH6	Q8WUH6	Transmembrane protein 263	TMEM263
5.78	5.61979	P14598;A6NI72;A8MVU1;P14598-2;A0A087X1W0	P14598;A6NI72;A8MVU1	Neutrophil cytosol factor 1;Putative neutrophil cytosol factor 1B;Putative neutrophil cytosol factor 1C	NCF1;NCF1B;NCF1C
5.78	5.9428	O15400-2;O15400	O15400-2;O15400	Syntaxin-7	STX7
5.779	4.79628	E7EM64;Q7L5N1;H7C3T0	E7EM64;Q7L5N1	COP9 signalosome complex subunit 6	COPS6
5.777	5.72782	O75475;O75475-2	O75475;O75475-2	PC4 and SFRS1-interacting protein	PSIP1
5.775	5.19921	Q9NZL9;Q9NZL9-3;H7C0X7;E5RJR3;Q9NZL9-5	Q9NZL9;Q9NZL9-3;H7C0X7	Methionine adenosyltransferase 2 subunit beta	MAT2B
5.773	5.60517	O75396;A0A087X1A9	O75396	Vesicle-trafficking protein SEC22b	SEC22B
5.772	4.58315	P19784;H3BSA1;H3BV19;H3BNI9	P19784;H3BSA1;H3BV19	Casein kinase II subunit alpha	CSNK2A2
5.772	5.01496	Q08J23;Q08J23-3;A0A140T9Y7	Q08J23;Q08J23-3	tRNA (cytosine(34)-C(5))-methyltransferase	NSUN2
5.771	3.54639	Q96RP9;Q96RP9-2;C9IZ01;F8WAU4;C9JA25	Q96RP9;Q96RP9-2;C9IZ01;F8WAU4	Elongation factor G, mitochondrial	GFM1
5.771	5.33367	Q8WXX5	Q8WXX5	DnaJ homolog subfamily C member 9	DNAJC9
5.77	4.40311	P54105;E9PMI6;J3KN38;E9PJF4	P54105;E9PMI6;J3KN38;E9PJF4	Methylosome subunit pICln	CLNS1A
5.77	4.92177	O00193;E9PM92;E9PRZ9;E9PQA1	O00193;E9PM92;E9PRZ9	Small acidic protein	SMAP;C11orf58
5.769	5.00835	P78406;E9PQ57;E9PPG9;B0QZ36;B0QZ37	P78406;E9PQ57;E9PPG9	mRNA export factor	RAE1
5.769	5.25338	P04844;P04844-2;Q5JYR7;Q5JYR4;F2Z3K5;Q5JYR3;H0Y5M1	P04844;P04844-2	Dolichyl-diphosphooligosaccharide--protein glycosyltransferase subunit 2	RPN2
5.768	5.55674	P61026;A0A087WWB9;P59190-2;P59190	P61026	Ras-related protein Rab-10	RAB10
5.767	5.0313	P35606;P35606-2;D6R997;H0Y938;H0YAC7;D6RBT6;D6RBZ7;D6RCL6;D6RBG7	P35606;P35606-2	Coatomer subunit beta	COPB2
5.767	5.18578	Q13126;B4DUC8;Q13126-4;Q13126-3;Q13126-2;J3QSB7;Q13126-7;Q13126-6;Q13126-5;F2Z2F3;F8WES2;J3KRN1	Q13126;B4DUC8;Q13126-4;Q13126-3;Q13126-2;J3QSB7;Q13126-7;Q13126-6;Q13126-5	S-methyl-5-thioadenosine phosphorylase;Purine nucleoside phosphorylase	MTAP
5.766	4.93005	J3KN29;O00233;F5H5V4;F5GX23;O00233-2;F5H7X1;F5H169;O00233-3	J3KN29;O00233;F5H5V4;F5GX23;O00233-2;F5H7X1;F5H169	26S proteasome non-ATPase regulatory subunit 9	PSMD9
5.765	2.61241	O95347;O95347-2;A0A0C4DGE5;Q5T821	O95347;O95347-2	Structural maintenance of chromosomes protein 2	SMC2
5.764	4.96368	O75874;C9J4N6;C9JJE5;C9JLU6	O75874	Isocitrate dehydrogenase [NADP] cytoplasmic	IDH1
5.764	4.8346	A0A1B0GWJ0;A0A1B0GTJ7;P30566;A0A0A6YY92;P30566-2;A0A1B0GWF8;A0A096LNY6;A0A1B0GTG9;A0A096LNY5;A0A096LPA2;A0A096LNY4;A0A096LP92;B4DEP1;A0A096LP72;A0A096LP76;A0A1W2PRX2;V9GY96;A0A096LNT0	A0A1B0GWJ0;A0A1B0GTJ7;P30566;A0A0A6YY92;P30566-2;A0A1B0GWF8;A0A096LNY6;A0A1B0GTG9;A0A096LNY5	Adenylosuccinate lyase	ADSL
5.76	4.65366	Q9NRF9	Q9NRF9	DNA polymerase epsilon subunit 3	POLE3
5.76	4.5665	G5EA30;Q92879-4;Q92879-2;Q92879-3;Q92879-6;Q92879;Q92879-5;E9PKU1;F5H0D8;E9PSH0;E9PQK4;F5H4Y5;E9PKA1;F5H3J7;V9GYD9	G5EA30;Q92879-4;Q92879-2;Q92879-3;Q92879-6;Q92879;Q92879-5;E9PKU1	CUGBP Elav-like family member 1	CELF1
5.759	4.84589	P49903;P49903-4;P49903-2;P49903-3;Q5T5U6;Q5T5U7	P49903;P49903-4;P49903-2;P49903-3;Q5T5U6	Selenide, water dikinase 1	SEPHS1
5.759	4.61014	P40937;P40937-2;F5H5S0;C9JH72;E9PEP3;F5H0U6;F5H304	P40937;P40937-2	Replication factor C subunit 5	RFC5
5.759	5.06415	Q53GQ0;A0A1B0GV93;A0A1B0GVY6;E9PI21;Q53GQ0-2	Q53GQ0;A0A1B0GV93;A0A1B0GVY6	Very-long-chain 3-oxoacyl-CoA reductase	HSD17B12
5.759	5.26992	Q10567-2;Q10567;C9J1E7;H7C034	Q10567-2;Q10567;C9J1E7	AP-1 complex subunit beta-1	AP1B1
5.759	5.15834	Q13561;Q13561-3;Q13561-2;H0YI98;F8W1I6;F8VW18;F8VX93;F8VRV7;H0YHL1;F8W0U6	Q13561;Q13561-3;Q13561-2;H0YI98;F8W1I6;F8VW18	Dynactin subunit 2	DCTN2
5.757	5.09629	Q9NX40;D6RG39;D6RIT9;Q9NX40-3;Q9NX40-2;Q9NX40-4;D6RDI5;D6RA54;D6RC55;D6R918;D6RBC5;D6RF07	Q9NX40;D6RG39;D6RIT9;Q9NX40-3;Q9NX40-2;Q9NX40-4	OCIA domain-containing protein 1	OCIAD1
5.757	6.03212	O75368	O75368	SH3 domain-binding glutamic acid-rich-like protein	SH3BGRL
5.757	4.31996	P16615;P16615-5;P16615-2;P16615-3;P16615-4;H7C5W9;J3QSY6;H3BVB2;A0A0C4DH86;H3BTW4	P16615;P16615-5;P16615-2;P16615-3;P16615-4;H7C5W9	Sarcoplasmic/endoplasmic reticulum calcium ATPase 2	ATP2A2
5.754	4.00392	Q16633	Q16633	POU domain class 2-associating factor 1	POU2AF1
5.752	5.32693	Q99598;C4P0D6;C4P0D8;Q5VVQ1;C4P0D4;Q9NRI2	Q99598;C4P0D6;C4P0D8	Translin-associated protein X	TSNAX;DISC1
5.752	5.63099	P24752;H0YEL7;P24752-2;E9PRQ6;E9PKF3	P24752	Acetyl-CoA acetyltransferase, mitochondrial	ACAT1
5.75	4.90409	P15531;P15531-2;E7ERL0;E5RHP0;C9K028	P15531;P15531-2;E7ERL0	Nucleoside diphosphate kinase A	NME1
5.75	4.55315	P54886	P54886	Delta-1-pyrroline-5-carboxylate synthase;Glutamate 5-kinase;Gamma-glutamyl phosphate reductase	ALDH18A1
5.75	4.56791	O43615;M0QXU7;M0QXM9;M0R301;M0R124	O43615;M0QXU7	Mitochondrial import inner membrane translocase subunit TIM44	TIMM44
5.749	5.25713	Q9BWF3;E9PB51;Q9BWF3-4;D6R9K7;J3QRR5;Q9BWF3-3;Q9BWF3-2	Q9BWF3;E9PB51;Q9BWF3-4	RNA-binding protein 4	RBM4
5.749	5.05607	P55735;P55735-2;P55735-4;P55735-3;A8MXL6;E7ERC8	P55735;P55735-2;P55735-4;P55735-3;A8MXL6	Protein SEC13 homolog	SEC13
5.749	4.6354	Q96DH6;B4DHE8;B4DM51;Q96DH6-3;J3QKT5;H0YHB7;O43347	Q96DH6;B4DHE8;B4DM51;Q96DH6-3	RNA-binding protein Musashi homolog 2	MSI2
5.747	3.92616	P17900;H0YBY3;E5RJD0	P17900	Ganglioside GM2 activator;Ganglioside GM2 activator isoform short	GM2A
5.746	6.17426	P53999;D6RC37;D6R970	P53999	Activated RNA polymerase II transcriptional coactivator p15	SUB1
5.746	5.06969	P03928	P03928	ATP synthase protein 8	MT-ATP8
5.745	5.19388	P61081;M0QX69;M0QYI6	P61081	NEDD8-conjugating enzyme Ubc12	UBE2M
5.744	5.53577	Q96C19;H0Y4Y4;A0A087X1Z2;Q9BUP0-2;C9JTV4;Q8WYH2	Q96C19	EF-hand domain-containing protein D2	EFHD2
5.744	5.13446	O60711;O60711-2;B7Z5P7;E9PNX9	O60711;O60711-2;B7Z5P7	Leupaxin	LPXN
5.744	5.0113	Q9BZL1;K7EQ43	Q9BZL1	Ubiquitin-like protein 5	UBL5
5.743	5.35367	Q9UJZ1;A0A087WYB4;Q9UJZ1-2;F2Z2I8	Q9UJZ1;A0A087WYB4;Q9UJZ1-2	Stomatin-like protein 2, mitochondrial	STOML2
5.742	5.13927	P53803;E5RGX2	P53803	DNA-directed RNA polymerases I, II, and III subunit RPABC4	POLR2K
5.742	5.2731	P20073-2;P20073	P20073-2;P20073	Annexin A7	ANXA7
5.741	4.8607	Q92900;Q92900-2	Q92900;Q92900-2	Regulator of nonsense transcripts 1	UPF1
5.741	5.42826	P61019;P61019-2;E9PKL7;H7C125;H0YD31;H0YDL5;A0A1D5RMT4	P61019;P61019-2;E9PKL7	Ras-related protein Rab-2A	RAB2A
5.741	4.95046	P61201;P61201-2;B4DIH5;H0YKU5;H0YM03;H0YMC2	P61201;P61201-2;B4DIH5;H0YKU5	COP9 signalosome complex subunit 2	COPS2
5.736	5.63223	P08559;P08559-3;P08559-2;P08559-4;Q5JPU3;Q5JPU0;Q5JPT9;Q5JPU1;Q5JPU2;P29803	P08559;P08559-3;P08559-2;P08559-4	Pyruvate dehydrogenase E1 component subunit alpha, somatic form, mitochondrial	PDHA1
5.734	5.57658	Q96G03;Q96G03-2;E7ENQ8;E9PD70;H0Y921	Q96G03	Phosphoglucomutase-2	PGM2
5.733	5.13775	O43598;O43598-2;H0Y8X4	O43598;O43598-2;H0Y8X4	2-deoxynucleoside 5-phosphate N-hydrolase 1	DNPH1
5.733	4.95611	Q92973-2;Q92973;Q92973-3;S4R398;E7EW37;K7ELC3	Q92973-2;Q92973;Q92973-3	Transportin-1	TNPO1
5.733	5.00915	P12081;P12081-4;B3KWE1;P12081-2;P12081-3;B4DDD8;B4E1C5;E7ETE2;D6RF05	P12081;P12081-4;B3KWE1;P12081-2;P12081-3;B4DDD8;B4E1C5;E7ETE2	Histidine--tRNA ligase, cytoplasmic	HARS
5.732	5.64921	P31040;D6RFM5;P31040-2;A0A087X1I3;P31040-3;H0Y8X1	P31040;D6RFM5;P31040-2;A0A087X1I3;P31040-3	Succinate dehydrogenase [ubiquinone] flavoprotein subunit, mitochondrial	SDHA
5.732	5.67472	Q92804-2;Q92804;A0A075B7D9;A0A075B7F4;A0A075B7F2;A0A075B7C1;A0A075B7E4	Q92804-2;Q92804;A0A075B7D9	TATA-binding protein-associated factor 2N	TAF15
5.732	5.11955	Q15008;Q15008-4;Q15008-3;Q15008-2;C9J0E9;C9J7B7	Q15008;Q15008-4;Q15008-3;Q15008-2	26S proteasome non-ATPase regulatory subunit 6	PSMD6
5.732	4.89295	Q14204;H0YJ21	Q14204	Cytoplasmic dynein 1 heavy chain 1	DYNC1H1
5.732	5.07191	Q99426;Q99426-2;K7EP07;K7EK42;K7EL99;K7EQH0;K7ER04	Q99426;Q99426-2;K7EP07;K7EK42	Tubulin-folding cofactor B	TBCB
5.731	5.37628	Q9BX68	Q9BX68	Histidine triad nucleotide-binding protein 2, mitochondrial	HINT2
5.729	5.60977	P14927;B7Z2R2;P14927-2	P14927;B7Z2R2;P14927-2	Cytochrome b-c1 complex subunit 7	UQCRB
5.729	5.29351	Q9BUJ2-2;Q9BUJ2;A0A0A0MRA5;B7Z4B8;Q9BUJ2-4;Q9BUJ2-3;M0R3F1;M0QYZ0;M0QYI8;M0R0K8;M0QZV6;M0R203;M0QYM5;M0R247;A0A087X1I2;M0QYG9	Q9BUJ2-2;Q9BUJ2;A0A0A0MRA5;B7Z4B8;Q9BUJ2-4;Q9BUJ2-3;M0R3F1;M0QYZ0	Heterogeneous nuclear ribonucleoprotein U-like protein 1	HNRNPUL1
5.728	5.13267	P53621;P53621-2	P53621;P53621-2	Coatomer subunit alpha;Xenin;Proxenin	COPA
5.728	4.94426	Q96I25;Q5W012;Q5W010;Q5W011;H0Y6J6	Q96I25;Q5W012	Splicing factor 45	RBM17
5.725	4.94995	P48739;P48739-3;A0A0A0MSW4;P48739-2;B3KYB7;B3KYB6	P48739;P48739-3;A0A0A0MSW4;P48739-2	Phosphatidylinositol transfer protein beta isoform	PITPNB
5.725	NaN	Q96KB5;Q96KB5-2;E5RFX4;E5RIE1	Q96KB5;Q96KB5-2;E5RFX4	Lymphokine-activated killer T-cell-originated protein kinase	PBK
5.725	4.57871	Q99615;Q99615-2;K7ESP1;K7EIH8;K7EPP7;K7ELJ8;K7ER44;K7EJV7;K7EJL5;K7EN19;K7EJ24;K7EJE9;K7EK03;K7ENB7;K7EQ73	Q99615;Q99615-2	DnaJ homolog subfamily C member 7	DNAJC7
5.724	5.18736	P33241;P33241-3;E7EMG9;P33241-2;E9PBD8;C9JU59;C9JKF7;C9JDV1;C9J9B9;C9JNQ1	P33241;P33241-3;E7EMG9;P33241-2;E9PBD8	Lymphocyte-specific protein 1	LSP1
5.724	NaN	E9PFP8;P57721-5;P57721-4;P57721;J3QT27;P57721-2;P57721-3;C9K0A2;F8WC71;C9IZV9;C9J7A9;C9JSA6;C9J5V4;C9JTY5;C9JZY3;C9J0A4;P57723-2;P57723	E9PFP8;P57721-5;P57721-4;P57721;J3QT27;P57721-2;P57721-3	Poly(rC)-binding protein 3	PCBP3
5.723	5.55001	P00390-2;P00390;P00390-3;P00390-4;P00390-5;H0YC68;E5RI06	P00390-2;P00390;P00390-3;P00390-4;P00390-5	Glutathione reductase, mitochondrial	GSR
5.723	4.99964	Q9HAV7	Q9HAV7	GrpE protein homolog 1, mitochondrial	GRPEL1
5.722	4.99027	Q9GZS3;H0YN81;H0YMF9;H0YL19;H0YM76;H3BQA8;H0YLA1	Q9GZS3;H0YN81;H0YMF9;H0YL19	WD repeat-containing protein 61;WD repeat-containing protein 61, N-terminally processed	WDR61
5.721	5.78365	Q13011;M0R248;M0QZW4;M0QXS7;M0R280;M0R1A2	Q13011;M0R248	Delta(3,5)-Delta(2,4)-dienoyl-CoA isomerase, mitochondrial	ECH1
5.72	4.62619	Q9UBS4;H7C2Y5	Q9UBS4;H7C2Y5	DnaJ homolog subfamily B member 11	DNAJB11
5.719	5.30421	V9GZ56;Q9Y4Z0;U3KQK1;U3KQS7;M0QXB0	V9GZ56;Q9Y4Z0;U3KQK1;U3KQS7	U6 snRNA-associated Sm-like protein LSm4	LSM4
5.719	5.89911	Q9Y5J7;A0A1W2PRH9;A0A1W2PQS5;G3V502;G3V2F3	Q9Y5J7;A0A1W2PRH9;A0A1W2PQS5;G3V502;G3V2F3	Mitochondrial import inner membrane translocase subunit Tim9	TIMM9
5.717	5.61056	Q16698-2;Q16698;E5RFV2;E5RJG7;E5RJD2;E5RID6;H0YAW3	Q16698-2;Q16698;E5RFV2;E5RJG7	2,4-dienoyl-CoA reductase, mitochondrial	DECR1
5.717	5.43976	Q9UNZ2;Q9UNZ2-5;Q9UNZ2-4;F2Z2K0;Q9UNZ2-6;R4GNE6;G3V4V8;R4GMY2	Q9UNZ2;Q9UNZ2-5;Q9UNZ2-4;F2Z2K0;Q9UNZ2-6	NSFL1 cofactor p47	NSFL1C
5.717	5.48834	H0YHG0;Q6Y2X3;H0YHH1;H0YIP3	H0YHG0
5.716	5.62418	Q08257;Q08257-3;A6NP24;C9JH92;Q08257-2	Q08257;Q08257-3;A6NP24;C9JH92;Q08257-2	Quinone oxidoreductase	CRYZ
5.715	5.38856	Q9H3N1;G3V448	Q9H3N1	Thioredoxin-related transmembrane protein 1	TMX1
5.715	4.01846	P36405	P36405	ADP-ribosylation factor-like protein 3	ARL3
5.714	5.31156	Q96K17;E9PL10;Q96K17-2;Q96K17-3	Q96K17;E9PL10;Q96K17-2	Transcription factor BTF3 homolog 4;Transcription factor BTF3	BTF3L4
5.714	3.99075	Q9Y547;X6R7Y7;A6NG08	Q9Y547;X6R7Y7	Intraflagellar transport protein 25 homolog	HSPB11
5.712	5.16253	E9PLK3;P55786;P55786-2;A6NEC2;E9PP11;H0YDG0;A6NEC2-2;H0YCQ5;E9PJY4;E9PPD4;E9PJ74;E9PJF9;E9PRQ5;E9PPZ2;A6NEC2-3;E9PI82	E9PLK3;P55786;P55786-2	Puromycin-sensitive aminopeptidase	NPEPPS
5.709	4.66322	Q9UBB4;Q9UBB4-2;A0A1W2PQD2;B1AHE4;B1AHE3	Q9UBB4;Q9UBB4-2;A0A1W2PQD2	Ataxin-10	ATXN10
5.708	4.83694	H3BV80;H3BMM9;H3BTC0;Q15287;Q15287-3;Q15287-2;H3BMS0;H3BRK4;H3BTV0;H3BNI3;H3BP82;H3BTR6;H3BUG0;H3BTY0;H3BNU7;H3BUL0	H3BV80;H3BMM9;H3BTC0;Q15287;Q15287-3;Q15287-2;H3BMS0	RNA-binding protein with serine-rich domain 1	RNPS1
5.707	4.83668	P22307-6;P22307-2;P22307-4;P22307-7;P22307-8;P22307;H0YF61	P22307-6;P22307-2;P22307-4;P22307-7;P22307-8;P22307;H0YF61	Non-specific lipid-transfer protein	SCP2
5.707	4.95925	Q01085-2	Q01085-2	Nucleolysin TIAR	TIAL1
5.706	4.84454	P18085;C9JAK5;C9JPM4;U3KQF2;F8WDB3	P18085;C9JAK5;C9JPM4;U3KQF2	ADP-ribosylation factor 4	ARF4
5.706	5.49516	O96000;O96000-2;H3BV16;H3BPJ9	O96000;O96000-2;H3BV16;H3BPJ9	NADH dehydrogenase [ubiquinone] 1 beta subcomplex subunit 10	NDUFB10
5.705	5.63158	O43399-2;O43399-4;O43399-3;O43399-6;A0A087WZ51	O43399-2;O43399-4;O43399-3;O43399-6;A0A087WZ51		TPD52L2
5.705	4.50818	O95373;E9PLJ0;E9PLB2	O95373	Importin-7	IPO7
5.704	5.07797	P25685;P25685-2;M0R080;M0QYT3;M0QXK0;M0R1D6;M0QZD0;M0R128;A0A1B0GX60	P25685;P25685-2	DnaJ homolog subfamily B member 1	DNAJB1
5.704	4.68028	Q9UMY1;H7C2B1;Q9UMY1-2	Q9UMY1;H7C2B1;Q9UMY1-2	Nucleolar protein 7	NOL7
5.703	5.25545	P84085;C9J1Z8	P84085;C9J1Z8	ADP-ribosylation factor 5	ARF5
5.703	4.88528	O14776;O14776-2;G3V220;Q5VWI1	O14776;O14776-2;G3V220	Transcription elongation regulator 1	TCERG1
5.702	5.24138	Q9NZ01;M0R3C3;M0QXM3;Q9NZ01-2;M0R329;B4DR74	Q9NZ01	Very-long-chain enoyl-CoA reductase	TECR
5.701	4.78769	Q92616	Q92616	Translational activator GCN1	GCN1L1
5.7	5.4441	E9PL01;A0A087WUC6;Q15005;E9PI68;E9PRB9;H0YE04	E9PL01;A0A087WUC6;Q15005;E9PI68;E9PRB9	Signal peptidase complex subunit 2	SPCS2
5.7	4.27463	Q15125;C9J719;C9JJ78	Q15125;C9J719;C9JJ78	3-beta-hydroxysteroid-Delta(8),Delta(7)-isomerase	EBP
5.7	5.7691	P04040	P04040	Catalase	CAT
5.699	5.45136	O75608;O75608-2;A0A087X1K9;E5RGR0;B4DP64;E5RJ48;E5RI35	O75608;O75608-2;A0A087X1K9;E5RGR0;B4DP64	Acyl-protein thioesterase 1	LYPLA1
5.698	5.5768	C9JRZ6;Q9NX63;F8WAR4;F8WD73	C9JRZ6;Q9NX63;F8WAR4	MICOS complex subunit MIC19	CHCHD3
5.698	5.48449	O43504	O43504	Ragulator complex protein LAMTOR5	LAMTOR5
5.696	5.03091	Q9BY32;Q9BY32-3;Q9BY32-2	Q9BY32;Q9BY32-3;Q9BY32-2	Inosine triphosphate pyrophosphatase	ITPA
5.696	NaN	Q9UMR2;H3BQK0;Q9UMR2-3;H3BN59;H3BMQ5	Q9UMR2;H3BQK0;Q9UMR2-3	ATP-dependent RNA helicase DDX19B	DDX19B
5.696	5.24933	P11387;E5RJ33;H0YBR3;H0YAR3	P11387	DNA topoisomerase 1	TOP1
5.696	4.80663	Q9BVP2-2;Q9BVP2;C9JZT7;B4DMU5;C9JYH9;Q5T376;Q9P2Q2	Q9BVP2-2;Q9BVP2	Guanine nucleotide-binding protein-like 3	GNL3
5.695	4.65583	O43765;K7EMD6;K7ERW5	O43765;K7EMD6	Small glutamine-rich tetratricopeptide repeat-containing protein alpha	SGTA
5.695	3.20451	Q5SRN5;P04439;Q5SRN7;A0A1W2PS24;P13746;P13746-2;A0A0G2JIF2;P30455;P30443;A0A0G2JI36;A0A1W2PSE7;A0A0G2JL56;A0A1W2PQD0;P05534;P30447;P30456	Q5SRN5;P04439;Q5SRN7;A0A1W2PS24;P13746;P13746-2;A0A0G2JIF2;P30455;P30443;A0A0G2JI36;A0A1W2PSE7;A0A0G2JL56;A0A1W2PQD0;P05534	HLA class I histocompatibility antigen, A-3 alpha chain;HLA class I histocompatibility antigen, A-11 alpha chain;HLA class I histocompatibility antigen, A-36 alpha chain;HLA class I histocompatibility antigen, A-1 alpha chain;HLA class I histocompatibility antigen, A-24 alpha chain	HLA-A
5.694	4.61281	Q9H910;Q9H910-3;A6NGP5;H3BMV3;H3BTV5;H3BMM8;B4E1P3;H3BS08	Q9H910;Q9H910-3;A6NGP5;H3BMV3;H3BTV5	Hematological and neurological expressed 1-like protein	HN1L
5.694	NaN	Q9NVQ4;Q9NVQ4-3;Q9NVQ4-2;C9JDZ2	Q9NVQ4;Q9NVQ4-3;Q9NVQ4-2;C9JDZ2	Fas apoptotic inhibitory molecule 1	FAIM
5.693	5.51838	O60220	O60220	Mitochondrial import inner membrane translocase subunit Tim8 A	TIMM8A
5.693	5.72093	P30740;P30740-2	P30740;P30740-2	Leukocyte elastase inhibitor	SERPINB1
5.692	NaN	Q03252	Q03252	Lamin-B2	LMNB2
5.69	4.8889	Q9NRX4;Q9NRX4-2	Q9NRX4	14 kDa phosphohistidine phosphatase	PHPT1
5.69	5.03167	P08567	P08567	Pleckstrin	PLEK
5.69	4.48996	P53041;H0YDU8;A8MU39	P53041;H0YDU8;A8MU39	Serine/threonine-protein phosphatase 5;Serine/threonine-protein phosphatase	PPP5C
5.689	4.9428	Q13573;G3V3A4;G3V4X8;G3V5R3	Q13573;G3V3A4;G3V4X8	SNW domain-containing protein 1	SNW1
5.689	2.22587	Q15021;E7EN77;F5GZK7;F5H431;REV__Q02790	Q15021;E7EN77	Condensin complex subunit 1	NCAPD2
5.688	5.28462	P19388;A0A0A0MQR7;A0A087WVZ9;A0A087WWX0;A0A087WVN5;K7EQN2;K7EJ87	P19388;A0A0A0MQR7;A0A087WVZ9;A0A087WWX0	DNA-directed RNA polymerases I, II, and III subunit RPABC1	POLR2E
5.688	5.02816	A0A0B4J220;E9PLD3;E9PRG8	A0A0B4J220;E9PLD3;E9PRG8	Uncharacterized protein C11orf98	C11orf98
5.687	4.71691	O75439;G3V0E4;F8WAZ6;F8WEA6;F8WBE1	O75439;G3V0E4	Mitochondrial-processing peptidase subunit beta	PMPCB
5.687	5.29838	Q9Y2W1	Q9Y2W1	Thyroid hormone receptor-associated protein 3	THRAP3
5.687	5.15839	Q14978-2;A0A0A0MRM9;Q14978;S4R349;S4R402;S4R3C2	Q14978-2;A0A0A0MRM9;Q14978	Nucleolar and coiled-body phosphoprotein 1	NOLC1
5.687	4.51354	P43246;E9PHA6;P43246-2;C9J809	P43246;E9PHA6;P43246-2	DNA mismatch repair protein Msh2	MSH2
5.686	3.88149	J3QRS9;O43670-2;O43670;O43670-4;X6R4W8;O43670-3;J3KS31;J3QS27;J3KTL1;J3KRB6;J3KRW6;H0Y3M2	J3QRS9;O43670-2;O43670;O43670-4;X6R4W8;O43670-3	BUB3-interacting and GLEBS motif-containing protein ZNF207	ZNF207
5.686	5.24856	O75643;O75643-2;B4E0P5	O75643	U5 small nuclear ribonucleoprotein 200 kDa helicase	SNRNP200
5.685	5.16754	P26640;A0A140T936;A0A140T954;P26640-2;H0Y426;A2ABF4;A0A0G2JJT9;A0A140T904	P26640;A0A140T936	Valine--tRNA ligase	VARS
5.684	5.04593	Q9NYF8-3;E9PK91;E9PQN2;E9PKI6;E9PK09;A0A1W2PQ43;H0YF00;H0YF63	Q9NYF8-3;E9PK91;E9PQN2;E9PKI6;E9PK09;A0A1W2PQ43		BCLAF1
5.684	5.24906	P46109	P46109	Crk-like protein	CRKL
5.683	4.74497	Q8NDC0	Q8NDC0	MAPK-interacting and spindle-stabilizing protein-like	MAPK1IP1L
5.683	5.4055	Q9BXP5-4;Q9BXP5-2;Q9BXP5-3;Q9BXP5;Q9BXP5-5;H7C3A1;H7C1K0;C9JUL9;H7C0U8;A0A0A0MSP6;A0A087X0F4	Q9BXP5-4;Q9BXP5-2;Q9BXP5-3;Q9BXP5;Q9BXP5-5;H7C3A1	Serrate RNA effector molecule homolog	SRRT
5.683	4.85029	O75792;A0A1W2PP97	O75792	Ribonuclease H2 subunit A	RNASEH2A
5.682	4.6019	Q14166;V9GY16	Q14166	Tubulin--tyrosine ligase-like protein 12	TTLL12
5.682	4.50819	P63272;D3DTZ5;J3QSB9;J3KSQ6;J3QR04	P63272;D3DTZ5;J3QSB9	Transcription elongation factor SPT4	SUPT4H1
5.681	4.90581	Q99442;F8WF48;F8WCJ7	Q99442;F8WF48;F8WCJ7	Translocation protein SEC62	SEC62
5.681	4.62412	P60602;P60602-2	P60602;P60602-2	Reactive oxygen species modulator 1	ROMO1
5.68	5.40493	Q9UBQ7;U3KQ56;Q9UBQ7-2	Q9UBQ7;U3KQ56	Glyoxylate reductase/hydroxypyruvate reductase	GRHPR
5.679	5.04122	Q2TAY7	Q2TAY7	WD40 repeat-containing protein SMU1;WD40 repeat-containing protein SMU1, N-terminally processed	SMU1
5.678	4.156	P08237;P08237-3;P08237-2;F8VX13;F8VNX2;F8VZQ1;F8VSL1;F8VW30;F8VZI0;F8VP00;F8W1J8;H0YIS9;F8VSF7;F8VUB8;F8VYK8;F8VTQ3;H0YHB8;F8VVE3	P08237;P08237-3;P08237-2	ATP-dependent 6-phosphofructokinase, muscle type	PFKM
5.678	6.39692	Q14019;H3BT58	Q14019	Coactosin-like protein	COTL1
5.677	5.19532	Q9BQ61;K7EN60;K7ELS0;K7ERU7	Q9BQ61;K7EN60	Uncharacterized protein C19orf43	C19orf43
5.677	3.71377	Q9BXJ9;A0A0B4J1W3;Q9BXJ9-4	Q9BXJ9;A0A0B4J1W3;Q9BXJ9-4	N-alpha-acetyltransferase 15, NatA auxiliary subunit	NAA15
5.677	4.88342	P61758;B4DWR3	P61758;B4DWR3	Prefoldin subunit 3	VBP1
5.676	4.83549	Q12972;Q12972-2;A0A0A0MT09;Q12972-3	Q12972	Nuclear inhibitor of protein phosphatase 1;Activator of RNA decay	PPP1R8
5.675	5.63061	Q9UH65;E7EMB1;E9PJM7;E9PJK8	Q9UH65;E7EMB1	Switch-associated protein 70	SWAP70
5.674	4.66117	Q9H0Z9;F6VZ39;Q9H0Z9-2;Q9BX46;H0YA61;A6NG75;H0Y8S7;Q9BX46-5;Q9BX46-2;E9PSF1	Q9H0Z9;F6VZ39;Q9H0Z9-2;Q9BX46;H0YA61	RNA-binding protein 38;RNA-binding protein 24	RBM38;RBM24
5.673	4.04114	O95456;O95456-2;F8WBH7	O95456;O95456-2	Proteasome assembly chaperone 1	PSMG1
5.672	3.65162	P49459;A0A0D9SG71;A0A0R4J2E5;P49459-3;A0A0D9SEZ6;P49459-2	P49459;A0A0D9SG71;A0A0R4J2E5;P49459-3;A0A0D9SEZ6;P49459-2	Ubiquitin-conjugating enzyme E2 A	UBE2A
5.671	5.03815	O75934	O75934	Pre-mRNA-splicing factor SPF27	BCAS2
5.669	5.3037	Q9ULZ3;Q9ULZ3-3;H3BP42	Q9ULZ3;Q9ULZ3-3	Apoptosis-associated speck-like protein containing a CARD	PYCARD
5.668	5.29113	P17480	P17480	Nucleolar transcription factor 1	UBTF
5.666	5.92167	O00567;Q5JXT2;H0YDU4;H0Y653	O00567	Nucleolar protein 56	NOP56
5.666	4.94433	Q9BZK7;A0A0D9SF63;A0A1B0GVH3;A0A0D9SFI2;A0A1B0GUU2;F8W9D8;C9IYU9;C9JTW8;C9JY82;C9JEC9;C9J3H2;C9J903;A0A0D9SEW5;A0A0D9SFS8;C9J7E1;C9JCW4;C9JLJ1;C9JCK0;C9JBN1;A0A0D9SF25	Q9BZK7;A0A0D9SF63	F-box-like/WD repeat-containing protein TBL1XR1	TBL1XR1
5.665	5.79249	A0A0A0MT22;P08575;X6R433;P08575-2;M3ZCP1;A0A075B788;E9PKH0;A0A140TA68;A0A140TA77;A0A0G2JNW2;A0A140TA57;M9MMK9	A0A0A0MT22;P08575;X6R433;P08575-2	Protein-tyrosine-phosphatase;Receptor-type tyrosine-protein phosphatase C	PTPRC /CD45	+
5.665	2.50353	P43007;P43007-2	P43007;P43007-2	Neutral amino acid transporter A	SLC1A4
5.664	5.48464	P40259;P40259-3;P40259-2	P40259;P40259-3;P40259-2	B-cell antigen receptor complex-associated protein beta chain	CD79B
5.663	4.48807	Q8WY22;REV__Q96PE2	Q8WY22	BRI3-binding protein	BRI3BP
5.661	5.37255	Q6IBS0;D6RG15;H7C5I2	Q6IBS0;D6RG15	Twinfilin-2	TWF2
5.661	5.07528	P45974-2;P45974;F5H571	P45974-2;P45974	Ubiquitin carboxyl-terminal hydrolase 5	USP5
5.661	5.10977	P51649;P51649-2;C9J8Q5	P51649;P51649-2;C9J8Q5	Succinate-semialdehyde dehydrogenase, mitochondrial	ALDH5A1
5.661	5.29004	P26196;Q8IV96	P26196	Probable ATP-dependent RNA helicase DDX6	DDX6
5.659	5.87762	P51572;P51572-2;C9JSP1;C9JQ75;C9J0M4;C9JMD7;C9JM14	P51572;P51572-2;C9JSP1;C9JQ75;C9J0M4	B-cell receptor-associated protein 31	BCAP31
5.658	4.47795	P49770;G3V5E5;H0YJJ8;H0YK01	P49770;G3V5E5;H0YJJ8	Translation initiation factor eIF-2B subunit beta	EIF2B2
5.658	3.9286	P14735;P14735-2;Q5T5N3	P14735;P14735-2	Insulin-degrading enzyme	IDE
5.658	5.28897	Q9UBQ0;F8VXU5;Q9UBQ0-2;Q05DG7	Q9UBQ0;F8VXU5;Q9UBQ0-2	Vacuolar protein sorting-associated protein 29	VPS29
5.657	5.24104	O95831;O95831-3;O95831-2;E9PMA0;O95831-4;O95831-6;O95831-5	O95831;O95831-3;O95831-2	Apoptosis-inducing factor 1, mitochondrial	AIFM1
5.656	4.83105	P63151;P63151-2;E5RFR9;E5RIY1;A0A1W2PQI2;E5RHQ2;E5RJV2;H0YA16	P63151;P63151-2	Serine/threonine-protein phosphatase 2A 55 kDa regulatory subunit B alpha isoform	PPP2R2A
5.656	5.44865	D6R938;Q13557;Q13557-6;Q13557-11;E9PF82;Q13557-8;Q13557-10;Q13557-3;Q13557-4;E9PBG7;Q13557-9;Q13557-5;H0Y9J2;H0Y9C2;Q9UQM7;Q9UQM7-2;E9PBE8;E7EQE4;D6RHX9;E7ETC9	D6R938;Q13557;Q13557-6;Q13557-11;E9PF82;Q13557-8;Q13557-10;Q13557-3;Q13557-4;E9PBG7;Q13557-9;Q13557-5	Calcium/calmodulin-dependent protein kinase type II subunit delta	CAMK2D
5.656	4.97431	A0A087WZ13;E9PAU2;Q8IY67-2;K7EQG2;K7EKR9;Q8IY67-3	A0A087WZ13;E9PAU2;Q8IY67-2	Ribonucleoprotein PTB-binding 1	RAVER1
5.656	4.61772	O60739;K7EQP2	O60739	Eukaryotic translation initiation factor 1b	EIF1B
5.655	4.98506	O75832;B1AJY5;B1AJY7;O75832-2;B1AJY6	O75832;B1AJY5;B1AJY7;O75832-2	26S proteasome non-ATPase regulatory subunit 10	PSMD10
5.655	4.97556	Q9NPA8-2;Q9NPA8;E5RHX8;J3KNT2;E5RI00;E5RHT9;E5RJ84	Q9NPA8-2;Q9NPA8	Transcription and mRNA export factor ENY2	ENY2
5.654	NaN	C9J4J4;Q02080-2;B8ZZJ5;B3KQ23	C9J4J4;Q02080-2;B8ZZJ5;B3KQ23	Myocyte-specific enhancer factor 2B	MEF2B
5.654	4.60222	O00629;H7C4F6	O00629	Importin subunit alpha-3	KPNA4
5.654	4.27903	Q96AT9;C9J9T0;C9IZU8;Q96AT9-4;Q96AT9-2;C9J6A7;Q96AT9-5;Q96AT9-3;C9IYE8;E7ESZ6;C9J8S0;Q2QD12;C9JCL8;E9PBG9;F8WBT4	Q96AT9;C9J9T0;C9IZU8;Q96AT9-4;Q96AT9-2;C9J6A7;Q96AT9-5;Q96AT9-3	Ribulose-phosphate 3-epimerase	RPE
5.651	5.17707	B0QYK0;Q01844-6;Q01844-3;Q01844;Q01844-5;A0A0D9SFL3;Q01844-2;Q01844-4	B0QYK0;Q01844-6;Q01844-3;Q01844;Q01844-5;A0A0D9SFL3;Q01844-2	RNA-binding protein EWS	EWSR1
5.651	4.35729	Q96C90	Q96C90	Protein phosphatase 1 regulatory subunit 14B	PPP1R14B
5.65	4.58716	Q8WVJ2;E5RFP0	Q8WVJ2;E5RFP0	NudC domain-containing protein 2	NUDCD2
5.65	NaN	Q14157-1;Q14157-4	Q14157-1;Q14157-4	Ubiquitin-associated protein 2-like	UBAP2L
5.649	5.09867	A0A0C4DGS1;P39656-3;P39656;P39656-2;U3KQ84	A0A0C4DGS1;P39656-3;P39656;P39656-2	Dolichyl-diphosphooligosaccharide--protein glycosyltransferase 48 kDa subunit	DDOST
5.649	5.36934	A0A087WZN1;O43837;A0A087X2E5;O43837-2;O43837-3;A0A0D9SG66	A0A087WZN1;O43837;A0A087X2E5;O43837-2	Isocitrate dehydrogenase [NAD] subunit, mitochondrial;Isocitrate dehydrogenase [NAD] subunit beta, mitochondrial	IDH3B
5.648	5.46386	P10515;E9PEJ4;H0YDD4	P10515;E9PEJ4;H0YDD4	Dihydrolipoyllysine-residue acetyltransferase component of pyruvate dehydrogenase complex, mitochondrial;Acetyltransferase component of pyruvate dehydrogenase complex	DLAT
5.647	5.10788	Q9Y5M8;H7C4H2;C9J5Z8	Q9Y5M8;H7C4H2	Signal recognition particle receptor subunit beta	SRPRB
5.647	NaN	O95861-3;F8VRY7	O95861-3
5.646	5.34362	P46063;F8WA66;F8WD97;F5H2L2;F5H4P4;F5H3W0;F5GYB7	P46063	ATP-dependent DNA helicase Q1	RECQL
5.646	5.32608	Q9BVC6	Q9BVC6	Transmembrane protein 109	TMEM109
5.645	4.70253	Q86SX6	Q86SX6	Glutaredoxin-related protein 5, mitochondrial	GLRX5
5.644	4.92897	P26639;P26639-2;D6R9F8;D6RCA5;D6RDJ6;D6RBR8;D6RJ97;D6RHV7;D6RCS6	P26639;P26639-2	Threonine--tRNA ligase, cytoplasmic	TARS
5.644	5.48695	Q9NX24;D6RC52;D6RCB9;J3QSY4;H0YC83	Q9NX24;D6RC52;D6RCB9;J3QSY4	H/ACA ribonucleoprotein complex subunit 2	NHP2
5.644	5.39393	Q13423;E9PCX7;D6RAI5;D6RHU2;H0Y8P5;D6RCR6	Q13423;E9PCX7	NAD(P) transhydrogenase, mitochondrial	NNT
5.643	4.57068	P51114;B4DXZ6;P51114-3;C9JAJ4;H7C4S4;C9JY20;C9JZE0;C9IZ22;C9J5B4;C9JYQ6	P51114;B4DXZ6;P51114-3	Fragile X mental retardation syndrome-related protein 1	FXR1
5.643	4.04426	Q15382;C9J931;C9J469;F8WBL3	Q15382;C9J931	GTP-binding protein Rheb	RHEB
5.641	4.8536	O15355	O15355	Protein phosphatase 1G	PPM1G
5.641	4.92312	O75223;M0QZK8;B8ZZK2;O75223-3;H7BZK5;O75223-2;O75223-4;A0A0B4J1Y4	O75223;M0QZK8;B8ZZK2	Gamma-glutamylcyclotransferase	GGCT
5.641	4.60484	P46926;D6R9P4;D6RAY7;D6RFF8;P46926-2;D6RB13;D6R917;D6RFK5	P46926;D6R9P4;D6RAY7;D6RFF8;P46926-2;D6RB13;D6R917	Glucosamine-6-phosphate isomerase 1;Glucosamine-6-phosphate isomerase	GNPDA1
5.639	5.39082	P51970	P51970	NADH dehydrogenase [ubiquinone] 1 alpha subcomplex subunit 8	NDUFA8
5.638	3.86861	Q9Y294	Q9Y294	Histone chaperone ASF1A	ASF1A
5.636	4.43499	P11233;H7C3P7;C9JPE8	P11233;H7C3P7	Ras-related protein Ral-A	RALA
5.635	3.98832	Q9Y2Q9;H0YAT2;H7C5V3;E5RGC7;E5RFH3;E5RK86;E5RFT8	Q9Y2Q9;H0YAT2;H7C5V3;E5RGC7;E5RFH3	28S ribosomal protein S28, mitochondrial	MRPS28
5.635	6.03071	P55263;P55263-3	P55263;P55263-3	Adenosine kinase	ADK
5.634	4.98461	F5GWX5;A0A0C4DGG9;Q14839;Q14839-2;F5H6N4;F6T542;K7EPV1;K7ESA5	F5GWX5;A0A0C4DGG9;Q14839;Q14839-2	Chromodomain-helicase-DNA-binding protein 4	CHD4
5.634	5.00439	Q15363;F5GX39;E7EQ72	Q15363;F5GX39;E7EQ72	Transmembrane emp24 domain-containing protein 2	TMED2
5.633	4.70673	O00429;O00429-3;O00429-6;O00429-5;O00429-7;F8VZ52;F8W1W3;F8VUJ9;B4DDQ3;B4DPZ9;F8VR28;F8VYL3;H0YHY4;H0YI79	O00429;O00429-3;O00429-6;O00429-5;O00429-7	Dynamin-1-like protein	DNM1L
5.63	5.63541	A0A0C4DGQ5;P04632;K7ELJ7;A0A075B7C0;U3KQE2;K7EKD8;K7EIV0;K7EM73;U3KPR7;K7EMQ1;K7ES78;Q96L46	A0A0C4DGQ5;P04632;K7ELJ7;A0A075B7C0;U3KQE2;K7EKD8;K7EIV0;K7EM73	Calpain small subunit 1	CAPNS1
5.629	5.20969	O75489;E9PS48;O75489-2;G3V194;E9PKL8	O75489	NADH dehydrogenase [ubiquinone] iron-sulfur protein 3, mitochondrial	NDUFS3
5.629	4.42771	Q9NRN7;E9PLW6;E9PNF3;Q9NRN7-2	Q9NRN7;E9PLW6	L-aminoadipate-semialdehyde dehydrogenase-phosphopantetheinyl transferase	AASDHPPT
5.628	5.48804	O75340;O75340-2;A0A024QZ42;H0Y9X3;A0A087WZ38;E7EPW6;O75340-3;D6RA21;Q86W51	O75340;O75340-2;A0A024QZ42	Programmed cell death protein 6	PDCD6
5.627	3.93365	Q8N5M4;E9PKV8;H0YDR3;E7EST3;Q8N5M4-2	Q8N5M4;E9PKV8;H0YDR3	Tetratricopeptide repeat protein 9C	TTC9C
5.626	4.98284	A0A087X020;Q9Y3A5;F8WE72	A0A087X020;Q9Y3A5	Ribosome maturation protein SBDS	SBDS
5.625	4.99847	Q14677-3;Q14677-2;Q14677;H0YD52	Q14677-3;Q14677-2;Q14677	Clathrin interactor 1	CLINT1
5.624	4.63956	Q9UBB5;X6RBL6;Q9UBB5-3;J3KSA7	Q9UBB5	Methyl-CpG-binding domain protein 2	MBD2
5.624	5.42615	P61009	P61009	Signal peptidase complex subunit 3	SPCS3
5.622	4.26483	A8MX21;Q9UKI3	A8MX21;Q9UKI3	Pre-B lymphocyte protein 3	VPREB3
5.622	4.82803	B7ZC38;Q9NR46;Q9NR46-2;B7ZC39;F8WFB9;G5E9J1;H7C1Z6	B7ZC38;Q9NR46;Q9NR46-2;B7ZC39	Endophilin-B2	SH3GLB2
5.622	4.7756	E9PRQ7;Q04323;A0A087WTZ5;E9PJ81;Q04323-2;E9PS08	E9PRQ7;Q04323;A0A087WTZ5;E9PJ81;Q04323-2	UBX domain-containing protein 1	UBXN1
5.621	5.46338	Q9H444;Q96CF2;P59074	Q9H444	Charged multivesicular body protein 4b	CHMP4B
5.621	4.69365	P16989;P16989-3;Q9Y2T7;A0A0D9SEI8	P16989;P16989-3	Y-box-binding protein 3	YBX3
5.62	4.7678	Q16740;M0R208;M0QYV5	Q16740;M0R208	ATP-dependent Clp protease proteolytic subunit, mitochondrial;ATP-dependent Clp protease proteolytic subunit	CLPP
5.62	4.94683	P21964-2;P21964;E7EMS6;E7EUU8;H7BZ45;F8WBW9	P21964-2;P21964;E7EMS6;E7EUU8	Catechol O-methyltransferase	COMT
5.619	4.85071	P30519;A0A087WT44;I3L159;I3L1F5;I3L4P8;A0A1B0GXH0;I3L463;I3L276;I3L1Y2	P30519;A0A087WT44;I3L159;I3L1F5	Heme oxygenase 2	HMOX2
5.619	4.9766	P21281;H0YC04;C9JL73;P15313;E5RGH6;H0YAT8;C9JZ02;C9J5E3;C9JNS9;H0YC45	P21281	V-type proton ATPase subunit B, brain isoform	ATP6V1B2
5.619	5.30192	Q8N163-2;Q8N163;H0YB24;G3V119;E5RHJ4;E5RFJ3;A0A087X2B6;H0YC69;E5RGU7;H0YC58;E5RHH8	Q8N163-2;Q8N163;H0YB24;G3V119	Cell cycle and apoptosis regulator protein 2	CCAR2
5.619	5.48096	Q9Y3D6	Q9Y3D6	Mitochondrial fission 1 protein	FIS1
5.618	5.30602	Q9NYL9;H0YNJ8;H0YKU1;H0YNU8	Q9NYL9;H0YNJ8	Tropomodulin-3	TMOD3
5.618	3.43517	P0DN79;P35520;P35520-2;C9JMA6;H7C2H4;H7C1W6;H7C2W0	P0DN79;P35520;P35520-2	Cystathionine beta-synthase	CBS
5.618	4.56206	Q96FZ2;E7EMP6;D6R9T3;D6RAZ3;D6RGK7;D6RAI0	Q96FZ2;E7EMP6;D6R9T3;D6RAZ3	Embryonic stem cell-specific 5-hydroxymethylcytosine-binding protein	HMCES
5.617	5.22109	O94776;O94776-2	O94776;O94776-2	Metastasis-associated protein MTA2	MTA2
5.616	5.33131	O43678;O43678-2	O43678;O43678-2	NADH dehydrogenase [ubiquinone] 1 alpha subcomplex subunit 2	NDUFA2
5.616	5.55259	Q9H0U4;E9PLD0;Q92928	Q9H0U4;E9PLD0	Ras-related protein Rab-1B	RAB1B
5.614	3.8265	P22732;K7EJZ0;K7EIT1;P22732-2;K7EQI3;K7EJR1	P22732	Solute carrier family 2, facilitated glucose transporter member 5	SLC2A5
5.614	5.55595	P09972;A8MVZ9;J3KSV6;J3QKP5;C9J8F3;J3QKK1;K7EKH5	P09972;A8MVZ9	Fructose-bisphosphate aldolase C;Fructose-bisphosphate aldolase	ALDOC
5.614	4.61364	A0A087WUT6;O60841	A0A087WUT6;O60841	Eukaryotic translation initiation factor 5B	EIF5B
5.613	5.68476	Q14761	Q14761	Protein tyrosine phosphatase receptor type C-associated protein	PTPRCAP
5.612	3.54522	O15155;H7C1N3	O15155;H7C1N3	BET1 homolog	BET1
5.612	5.31501	P61006;P61006-2;H0YLJ8;H0YL94;P20337;Q96E17	P61006;P61006-2	Ras-related protein Rab-8A	RAB8A
5.612	4.63909	Q15437;Q5QPE2;Q5QPE1	Q15437;Q5QPE2	Protein transport protein Sec23B	SEC23B
5.611	4.58395	Q15404;Q15404-2	Q15404;Q15404-2	Ras suppressor protein 1	RSU1
5.609	4.88693	Q9Y6G9;E9PHI6;C9JGM7;C9JLW1	Q9Y6G9;E9PHI6	Cytoplasmic dynein 1 light intermediate chain 1	DYNC1LI1
5.609	4.96037	P53582;H0Y955;H0Y903;H0YAI3;H0Y9L0;D6RF24	P53582	Methionine aminopeptidase 1	METAP1
5.609	5.15077	O95372;Q5QPQ0;Q5QPQ1;Q5QPQ3;Q5QPQ2;Q5QPN9;Q5QPN5	O95372;Q5QPQ0;Q5QPQ1;Q5QPQ3;Q5QPQ2	Acyl-protein thioesterase 2	LYPLA2
5.609	5.22129	P62330	P62330	ADP-ribosylation factor 6	ARF6
5.607	5.18022	H7BZJ3	H7BZJ3		PDIA3
5.606	5.61875	P17066;P48741	P17066;P48741	Heat shock 70 kDa protein 6;Putative heat shock 70 kDa protein 7	HSPA6;HSPA7
5.606	5.32645	Q96SI9;Q96SI9-2;Q5JPA5;H0YC91;E9PKQ0	Q96SI9;Q96SI9-2	Spermatid perinuclear RNA-binding protein	STRBP
5.606	5.55091	Q8WW12;Q8WW12-2;Q8WW12-3	Q8WW12;Q8WW12-2	PEST proteolytic signal-containing nuclear protein	PCNP
5.606	3.8827	Q9UJS0;Q9UJS0-2;R4GN64	Q9UJS0;Q9UJS0-2	Calcium-binding mitochondrial carrier protein Aralar2	SLC25A13
5.605	4.75847	Q8TCS8;H7C3C5;H7BXF6;F8WBI3	Q8TCS8	Polyribonucleotide nucleotidyltransferase 1, mitochondrial	PNPT1
5.605	5.11422	P43307;P43307-2;C9J3L8;C9J5W0;E9PAL7;C9IZQ1;C9JBX5	P43307;P43307-2;C9J3L8;C9J5W0;E9PAL7;C9IZQ1	Translocon-associated protein subunit alpha	SSR1
5.605	4.83974	P25098;E9PRV7	P25098;E9PRV7	Beta-adrenergic receptor kinase 1	ADRBK1
5.605	4.26667	Q9NZL4;Q9NZL4-3;Q9NZL4-2;K7EL16;K7EN20;K7ERT9;K7EKM6;K7EMM7	Q9NZL4;Q9NZL4-3;Q9NZL4-2;K7EL16	Hsp70-binding protein 1	HSPBP1
5.604	5.39801	Q13043;F5H5B4;Q13043-2;A0A087WYT4;A0A087WVN8	Q13043;F5H5B4;Q13043-2	Serine/threonine-protein kinase 4;Serine/threonine-protein kinase 4 37kDa subunit;Serine/threonine-protein kinase 4 18kDa subunit	STK4
5.604	4.94753	O14828	O14828	Secretory carrier-associated membrane protein 3	SCAMP3
5.603	5.53548	P21912;A0A087WWT1;A0A087WXX8	P21912;A0A087WWT1;A0A087WXX8	Succinate dehydrogenase [ubiquinone] iron-sulfur subunit, mitochondrial	SDHB
5.603	4.45314	O60488-2;O60488;H0Y9A0;D6RF95;D6RD96;D6RFW9;D6RDA8	O60488-2;O60488	Long-chain-fatty-acid--CoA ligase 4	ACSL4
5.602	5.28729	Q9NR28-2;Q9NR28;A0A024RBT2;F5H796;Q9NR28-3;F5GXT8;F5GYH3;F5GX50;H7BZK7;F5H0Q4;H7BZQ7	Q9NR28-2;Q9NR28;A0A024RBT2;F5H796;Q9NR28-3;F5GXT8	Diablo homolog, mitochondrial	DIABLO
5.602	4.54035	P11166;A6NL68;A0A0D9SG74;A0A0D9SFK9	P11166	Solute carrier family 2, facilitated glucose transporter member 1	SLC2A1
5.602	4.82674	O75663;O75663-2	O75663;O75663-2	TIP41-like protein	TIPRL
5.601	4.85438	O60828;O60828-5;O60828-2;O60828-4;C9JQA1;O60828-3;H7C053;O60828-7;O60828-6;O60828-10;O60828-9;O60828-8	O60828;O60828-5;O60828-2;O60828-4;C9JQA1;O60828-3	Polyglutamine-binding protein 1	PQBP1
5.601	4.44782	Q8WWM7;Q8WWM7-6;Q8WWM7-8;Q8WWM7-5;Q8WWM7-4;Q8WWM7-2;Q8WWM7-3;Q8WWM7-7;H3BUE3;H3BSQ5;H3BRB0;A0A0C4DGL7	Q8WWM7;Q8WWM7-6;Q8WWM7-8;Q8WWM7-5;Q8WWM7-4;Q8WWM7-2;Q8WWM7-3	Ataxin-2-like protein	ATXN2L
5.6	NaN	Q9NR33	Q9NR33	DNA polymerase epsilon subunit 4	POLE4
5.6	4.89876	Q15286;F5H157;Q15286-2;F5H7F8	Q15286;F5H157;Q15286-2	Ras-related protein Rab-35	RAB35
5.598	4.30526	P62873;P62873-2;B3KVK2;F6UT28;F6X3N5;B1AKQ8;F5H8J8;F5H100;F5H0S8;E9PCP0;P16520-2;P16520	P62873;P62873-2;B3KVK2	Guanine nucleotide-binding protein G(I)/G(S)/G(T) subunit beta-1	GNB1
5.598	5.88191	P00403	P00403	Cytochrome c oxidase subunit 2	MT-CO2
5.598	5.19165	A0A0C4DGS0;P56556;R4GN43	A0A0C4DGS0;P56556;R4GN43	NADH dehydrogenase [ubiquinone] 1 alpha subcomplex subunit 6	NDUFA6
5.597	4.30573	P48637;P48637-2	P48637;P48637-2	Glutathione synthetase	GSS
5.597	4.95089	P51398-2;P51398;P51398-3;V9GZ03;V9GYL9;V9GYJ9;V9GYA7;V9GZ61;V9GYC9;V9GYW1;V9GY11;V9GYJ3;V9GYF7;V9GYR8;V9GYL4	P51398-2;P51398;P51398-3;V9GZ03;V9GYL9;V9GYJ9	28S ribosomal protein S29, mitochondrial	DAP3
5.595	4.6656	Q9NUP9;G3V1D4;O14910;H0YIA8;H0YI92;J3KN23;Q9HAP6	Q9NUP9;G3V1D4	Protein lin-7 homolog C	LIN7C
5.595	5.31191	Q9P013	Q9P013	Spliceosome-associated protein CWC15 homolog	CWC15
5.595	4.77087	O75940	O75940	Survival of motor neuron-related-splicing factor 30	SMNDC1
5.595	3.60577	Q13217;X6R9L0	Q13217;X6R9L0	DnaJ homolog subfamily C member 3	DNAJC3
5.594	5.13901	Q14151;Q14151-2;K7EQU4;K7ERX3	Q14151	Scaffold attachment factor B2	SAFB2
5.594	4.72046	P78344;D3DQV9;H0YCH5;H0YD77;H0YEC5;H0YE22;H0YCF8;H0YEN8;H0YDC0;H0YE44;H0YD99;H0YEI7;H0YEW3	P78344;D3DQV9;H0YCH5	Eukaryotic translation initiation factor 4 gamma 2	EIF4G2
5.593	5.21164	Q9UL25	Q9UL25	Ras-related protein Rab-21	RAB21
5.593	5.16494	A0A0A0MRR7;P09234;Q5TAL2	A0A0A0MRR7;P09234	U1 small nuclear ribonucleoprotein C	SNRPC
5.593	5.09556	Q8N1F7;H3BVG0;Q8N1F7-2;H3BM93;H3BRI8;H3BV11;H3BPA9;H3BNN5;H3BP95;H3BMX0;H3BVE2;H3BRD9;H3BV15;H3BNG7	Q8N1F7;H3BVG0;Q8N1F7-2	Nuclear pore complex protein Nup93	NUP93
5.592	4.74764	Q92905;E5RHH5;E5RFS1;E5RG35;E5RK55;E5RHF2	Q92905	COP9 signalosome complex subunit 5	COPS5
5.592	5.06398	Q8WWY3;E7EVX8;Q8WWY3-4;Q8WWY3-3;Q8WWY3-2;E7EU94;E7ESX0;E7EN72	Q8WWY3;E7EVX8;Q8WWY3-4;Q8WWY3-3;Q8WWY3-2	U4/U6 small nuclear ribonucleoprotein Prp31	PRPF31
5.592	4.67542	Q13409-3;Q13409-2;Q13409-7;Q13409;E7EQL5;E7EV09;E7EQU2;E7ESD3;E7ETL8;E7EMU4;E7ET01;E9PGG1;E7EUM4;E7ERR6;E7ERH4;E7EU01;E5RFE1;C9J3E7;E5RJ75	Q13409-3;Q13409-2;Q13409-7;Q13409;E7EQL5;E7EV09	Cytoplasmic dynein 1 intermediate chain 2	DYNC1I2
5.591	4.87641	P40938;P40938-2;A0A087X270	P40938;P40938-2	Replication factor C subunit 3	RFC3
5.591	NaN	Q15041;Q15041-3;Q15041-2;H3BTX6	Q15041;Q15041-3;Q15041-2;H3BTX6	ADP-ribosylation factor-like protein 6-interacting protein 1	ARL6IP1
5.59	3.96248	Q86X55-1;Q86X55;Q86X55-2;K7EQA8;K7EPK1;K7EK20;K7EIQ8;K7ERM3;K7EQB9	Q86X55-1;Q86X55;Q86X55-2;K7EQA8	Histone-arginine methyltransferase CARM1	CARM1
5.59	4.7404	O15042-2;O15042;E7ET15;O15042-3;H0Y8D9;E7EW00;H7C4V2;C9J5L1;C9JDJ7;U3KPT1	O15042-2;O15042;E7ET15;O15042-3	U2 snRNP-associated SURP motif-containing protein	U2SURP
5.589	4.92128	Q9BYG3;C9J808;C9J6C5;H7BZL0	Q9BYG3;C9J808;C9J6C5	MKI67 FHA domain-interacting nucleolar phosphoprotein	NIFK
5.589	4.78074	Q12974;Q12974-3;Q12974-4;E9PMY3;E9PML8;E9PJC0;E9PRR9;Q12974-2;E9PL34	Q12974;Q12974-3;Q12974-4;E9PMY3;E9PML8;E9PJC0;E9PRR9;Q12974-2	Protein tyrosine phosphatase type IVA 2	PTP4A2
5.588	4.82573	D6REX3;O94979;O94979-3;O94979-9;O94979-2;O94979-8;O94979-4;O94979-6;O94979-10;D6RHZ5;H7BXG7;O94979-7;O94979-5;H0Y8V7;H0Y9K1;H0Y9T9;H0Y8W8;D6RE64;D6RCQ9;H0YAF5;D6RBT0;D6RHE8;H0Y9V3	D6REX3;O94979;O94979-3;O94979-9;O94979-2;O94979-8;O94979-4;O94979-6;O94979-10;D6RHZ5;H7BXG7;O94979-7;O94979-5	Protein transport protein Sec31A	SEC31A
5.588	5.57428	P53597;H7C233	P53597	Succinyl-CoA ligase [ADP/GDP-forming] subunit alpha, mitochondrial	SUCLG1
5.587	4.79387	Q99627;E9PGT6;Q99627-2;H7C3S9;F8WEF2	Q99627;E9PGT6;Q99627-2	COP9 signalosome complex subunit 8	COPS8
5.587	5.08994	O75131;A0A087WYQ3;H0YB26;E5RHZ0;A0A087WXR6;A0A087WUS8;E5RFT7;E7ENV7;Q86YQ8-2;Q9HCH3-2;Q96A23;O95741;Q86YQ8;Q96A23-2;Q9HCH3;O95741-2	O75131;A0A087WYQ3	Copine-3	CPNE3
5.587	5.20382	Q9UK45;A0A087X2I5;K7ENY5;K7EML7	Q9UK45	U6 snRNA-associated Sm-like protein LSm7	LSM7
5.586	4.91511	Q9UHA4;Q9UHA4-2	Q9UHA4;Q9UHA4-2	Ragulator complex protein LAMTOR3	LAMTOR3
5.586	4.79707	J3KR35;Q8WUD4;C9JUN5;S4R331	J3KR35;Q8WUD4;C9JUN5;S4R331	Coiled-coil domain-containing protein 12	CCDC12
5.585	5.40684	P12236	P12236	ADP/ATP translocase 3;ADP/ATP translocase 3, N-terminally processed	SLC25A6
5.585	5.63759	P13489;H0YCR7;E9PIM9;E9PMJ3;E9PLZ3;E9PIK5;E9PMN0;E9PMA9;E9PR82;E9PMI1	P13489;H0YCR7	Ribonuclease inhibitor	RNH1
5.585	5.18629	Q15435;Q15435-2;H7C003;C9JD73;C9J177;Q15435-3;B5MBZ8;Q15435-5;Q15435-4;C9JRC4;H7C118;H7C3Q5	Q15435;Q15435-2;H7C003;C9JD73;C9J177;Q15435-3;B5MBZ8;Q15435-5;Q15435-4	Protein phosphatase 1 regulatory subunit 7	PPP1R7
5.584	4.67438	Q10713;Q10713-2;Q5SXN9	Q10713;Q10713-2	Mitochondrial-processing peptidase subunit alpha	PMPCA
5.583	4.95151	Q9NVP1;H7C452	Q9NVP1	ATP-dependent RNA helicase DDX18	DDX18
5.582	4.96655	O60763;O60763-2;REV__R4GMN2	O60763;O60763-2	General vesicular transport factor p115	USO1
5.58	5.43613	Q7Z4W1;J3KS22;J3QS36;J3QL34;J3KRZ4;J3QS45;J3KSZ5;J3QRQ2	Q7Z4W1;J3KS22;J3QS36;J3QL34;J3KRZ4	L-xylulose reductase	DCXR
5.578	5.43475	O00161;O00161-2;H3BM38;H3BNE1;H3BR18;H3BPJ0;H3BV99;H3BP15;H3BQY9;H3BR99;H3BNG6;H3BU94	O00161;O00161-2;H3BM38;H3BNE1;H3BR18;H3BPJ0	Synaptosomal-associated protein 23;Synaptosomal-associated protein	SNAP23
5.578	5.38493	P11413;P11413-2;P11413-3;E9PD92	P11413;P11413-2;P11413-3;E9PD92	Glucose-6-phosphate 1-dehydrogenase	G6PD
5.578	2.60788	Q15003;E9PHA2;C9J470;Q15003-2;C9JZP1;H7C415	Q15003;E9PHA2;C9J470;Q15003-2	Condensin complex subunit 2	NCAPH
5.577	4.93136	Q9Y376;A0A087X0K1	Q9Y376;A0A087X0K1	Calcium-binding protein 39	CAB39
5.577	4.26062	P53602;H3BP35;H3BQ47;H3BRZ1;H3BVC4	P53602;H3BP35	Diphosphomevalonate decarboxylase	MVD
5.577	4.68871	O15067;H0YGH1;J3QSG0;J3QSH6;J3KT98;J3KTQ5;J3KTL4;J3QL39	O15067	Phosphoribosylformylglycinamidine synthase	PFAS
5.577	4.76822	Q96PU8;Q96PU8-9;Q96PU8-8;Q96PU8-6;Q96PU8-3;Q96PU8-5;H0YG47;F5GXS8;F5GYM3;H0YGD6;H0YFB7;F5H5U6;F5H8C8;F5GYT7	Q96PU8;Q96PU8-9;Q96PU8-8;Q96PU8-6;Q96PU8-3;Q96PU8-5;H0YG47	Protein quaking	QKI
5.576	3.80388	B7ZM99;Q6UB35;A0A087WVM4;H0Y327;Q6UB35-2;Q4VXM0;Q5JYA8;Q5JYA3;Q4VXM1;Q4VXV2	B7ZM99;Q6UB35;A0A087WVM4	Monofunctional C1-tetrahydrofolate synthase, mitochondrial	MTHFD1L
5.576	2.89035	O60343-2;O60343-3;O60343;O60343-5;O60343-4;Q5JU47	O60343-2;O60343-3;O60343	TBC1 domain family member 4	TBC1D4
5.575	NaN	Q15004;H0YMA4;A0A0U1RQM0;H0YKX3;A0A0U1RQC1;Q15004-2	Q15004;H0YMA4;A0A0U1RQM0;H0YKX3;A0A0U1RQC1;Q15004-2	PCNA-associated factor	KIAA0101
5.575	4.80864	Q8N684-3;Q8N684-2;Q8N684;F5H669;F5H6M0;F5H047;J3QT54;C9J286;C9J323;C9JM38;F5H5B7;F5H1W4;F5H2K8;F5H6P5;F5H6A8;F5GXA3	Q8N684-3;Q8N684-2;Q8N684;F5H669;F5H6M0;F5H047	Cleavage and polyadenylation specificity factor subunit 7	CPSF7
5.575	NaN	Q16763;K7EPJ1;K7EM75	Q16763;K7EPJ1	Ubiquitin-conjugating enzyme E2 S	UBE2S
5.575	5.17944	Q8N4H5;F8W8Z9;Q8N4H5-3;Q8N4H5-2;H3BUX3;H0YFG9	Q8N4H5;F8W8Z9;Q8N4H5-3;Q8N4H5-2	Mitochondrial import receptor subunit TOM5 homolog	TOMM5
5.571	4.98344	Q9UNF0-2;Q9UNF0;A0A0U1RR22;B0QYG7;B0QYG8;H0Y923	Q9UNF0-2;Q9UNF0;A0A0U1RR22	Protein kinase C and casein kinase substrate in neurons protein 2	PACSIN2
5.571	4.42529	Q6PKG0;Q6PKG0-3;A0A0B4J210;E5RH50;H0YBW1;H0YC33;H0YAN4;E5RHK4;H0YBM7;H0YBR8;H0YAX9;H0YBJ5	Q6PKG0;Q6PKG0-3;A0A0B4J210;E5RH50	La-related protein 1	LARP1
5.571	5.06115	Q8N1G4;J3KRP5	Q8N1G4	Leucine-rich repeat-containing protein 47	LRRC47
5.57	5.29704	P08574	P08574	Cytochrome c1, heme protein, mitochondrial	CYC1
5.57	2.45236	K7ERV3;K7ES52;K7ERJ1;K7ENW5	K7ERV3;K7ES52;K7ERJ1	Thymidine kinase	TK1
5.569	5.05966	P12270;P12270-2;Q5SWX9	P12270	Nucleoprotein TPR	TPR
5.568	5.06901	Q99459	Q99459	Cell division cycle 5-like protein	CDC5L
5.568	4.93824	Q00765;B7Z332;B7Z510;H0Y8J8;E2QRG8;Q00765-2	Q00765	Receptor expression-enhancing protein 5	REEP5
5.567	5.49194	Q9Y5X3;Q5QPE5;Q5QPE4;A0A087WUY5;U3KQL0;U3KQP5;Q9Y5X3-2	Q9Y5X3;Q5QPE5;Q5QPE4	Sorting nexin-5	SNX5
5.567	5.18106	P42126;Q96DC0;P42126-2;H3BS70	P42126;Q96DC0;P42126-2;H3BS70	Enoyl-CoA delta isomerase 1, mitochondrial	ECI1;DCI
5.567	4.88531	P01116-2;P01116	P01116-2;P01116	GTPase KRas;GTPase KRas, N-terminally processed	KRAS
5.567	4.98877	Q00796;H0YLA4;H0YKB3;Q00796-2	Q00796;H0YLA4	Sorbitol dehydrogenase	SORD
5.566	4.62497	Q3ZCQ8;Q3ZCQ8-2;Q3ZCQ8-3;M0R2F8;M0R003;M0R0C3;M0R1Y4;M0R047;M0QXC3;M0R2Z3;M0R303;M0R2D2;M0R2Q2	Q3ZCQ8;Q3ZCQ8-2;Q3ZCQ8-3;M0R2F8;M0R003;M0R0C3	Mitochondrial import inner membrane translocase subunit TIM50	TIMM50
5.565	5.04318	O94826	O94826	Mitochondrial import receptor subunit TOM70	TOMM70A
5.564	NaN	Q15306-2	Q15306-2	Interferon regulatory factor 4	IRF4
5.563	3.94031	Q12849;F5H5I6;H0Y8R1;H0YAK1;Q12849-5;H0YAM1	Q12849;F5H5I6;H0Y8R1;H0YAK1;Q12849-5	G-rich sequence factor 1	GRSF1
5.562	5.04148	P30419;P30419-2;K7EN82;B7Z8J4;Q5VUC6;O60551;K7EN42	P30419;P30419-2	Glycylpeptide N-tetradecanoyltransferase 1	NMT1
5.562	3.90847	P35613-2;P35613;A0A087X2B5;P35613-4;I3L192;A0A087WUV8;P35613-3;R4GMX5;R4GN83	P35613-2;P35613;A0A087X2B5;P35613-4;I3L192;A0A087WUV8;P35613-3	Basigin	BSG
5.56	4.91583	Q9Y295;H0YI06;F8WEE0	Q9Y295	Developmentally-regulated GTP-binding protein 1	DRG1
5.56	4.99521	O95232;J3KPP4;D6RDI2;C9JL41;O95232-2;H0YA81;D6RHH0;H7C5U7;U3KQT3;E7EN55;H0YBV7;H0YAR4	O95232;J3KPP4	Luc7-like protein 3	LUC7L3
5.559	5.61913	Q6JBY9;B7ZKW8;F6T4W9;Q6JBY9-2	Q6JBY9;B7ZKW8	CapZ-interacting protein	RCSD1
5.557	4.38526	Q13310-2;Q13310-3;H0Y5F5;H0YEU6;H0Y6X6	Q13310-2;Q13310-3;H0Y5F5	Polyadenylate-binding protein 4;Polyadenylate-binding protein	PABPC4
5.557	5.89801	Q12912	Q12912	Lymphoid-restricted membrane protein;Processed lymphoid-restricted membrane protein	LRMP
5.556	5.018	Q14165;F5H1S8;H0YG07;F5GX14	Q14165;F5H1S8;H0YG07	Malectin	MLEC
5.555	5.28179	Q9UQE7	Q9UQE7	Structural maintenance of chromosomes protein 3	SMC3
5.554	4.49075	Q96M27;Q96M27-3;Q96M27-2;Q96M27-5;Q96M27-4	Q96M27;Q96M27-3;Q96M27-2;Q96M27-5	Protein PRRC1	PRRC1
5.554	5.62409	Q06187;Q06187-2;U3NG26;Q5JY90;J3KR66;F8W9W0;C9JXA2;Q96L35;B1AKC9;F8VP57;B7ZKW7;B7ZKJ3;A0A0B4J1T8;Q9UF33-2;Q9UF33-3;P54762-5;P54756-3;P29317;P29320;P54762;P29323-2;P54760;P29323-3;Q15375-2;Q15375-4;Q15375;P29322;P54756-2;Q9UF33;P54756;P29323	Q06187;Q06187-2;U3NG26;Q5JY90	Tyrosine-protein kinase BTK;Non-specific protein-tyrosine kinase	BTK		+
5.554	5.39069	P28482;P28482-2	P28482;P28482-2	Mitogen-activated protein kinase 1	MAPK1
5.553	4.9767	Q8NE71;Q8NE71-2;H0YGW7;Q5STZ8;A0A0G2JIC2;F5GYK6	Q8NE71;Q8NE71-2;H0YGW7	ATP-binding cassette sub-family F member 1	ABCF1
5.553	4.7522	A0A0A6YYL4;P57737-3;I3L167;E7EP81;I3L442;I3L0X9;I3L3T0;Q9Y3D7;I3L1U7;I3L351;I3L2Y6;I3L426;I3L359;I3L0X8;I3L1M1;I3NI06;I3L1G9;A0A0B4J298	A0A0A6YYL4;P57737-3	Coronin;Coronin-7	CORO7-PAM16;CORO7
5.552	5.02264	A0A0C4DG89;D6RJA6;H0Y9U3	A0A0C4DG89		DDX46
5.551	6.34265	P80723;P80723-2;U3KQP0	P80723;P80723-2	Brain acid soluble protein 1	BASP1
5.551	5.81752	P17096-2	P17096-2	High mobility group protein HMG-I/HMG-Y	HMGA1
5.551	4.59613	Q9Y3D9	Q9Y3D9	28S ribosomal protein S23, mitochondrial	MRPS23
5.551	4.77721	Q9BXV9;H0YJA8	Q9BXV9	Uncharacterized protein C14orf142	C14orf142
5.55	4.21692	Q08623;Q08623-4;E7EVH9;Q08623-3;Q08623-2	Q08623;Q08623-4;E7EVH9;Q08623-3;Q08623-2	Pseudouridine-5-phosphatase	HDHD1
5.549	4.45397	Q15126	Q15126	Phosphomevalonate kinase	PMVK
5.549	4.60089	Q9HD45;Q5TB53	Q9HD45;Q5TB53	Transmembrane 9 superfamily member 3	TM9SF3
5.549	5.41335	Q6IAA8;F5GX19;F5H3Y3;H0YFI1;F5H479	Q6IAA8;F5GX19;F5H3Y3	Ragulator complex protein LAMTOR1	LAMTOR1
5.548	5.68184	O00483	O00483	Cytochrome c oxidase subunit NDUFA4	NDUFA4
5.547	4.79708	P21291;E9PS42;E9PND2;E9PP21	P21291;E9PS42;E9PND2;E9PP21	Cysteine and glycine-rich protein 1	CSRP1
5.545	4.9298	Q9H0A0;Q9H0A0-2;A0A087WV29;E9PMU0;E9PJN6	Q9H0A0;Q9H0A0-2;A0A087WV29	N-acetyltransferase 10	NAT10
5.545	5.08055	P19387;H3BRR2	P19387	DNA-directed RNA polymerase II subunit RPB3	POLR2C
5.545	5.67399	P11049-2;P11049;M0QZP6;B7ZAN3;P11049-3	P11049-2;P11049;M0QZP6;B7ZAN3;P11049-3	Leukocyte antigen CD37;Tetraspanin	CD37
5.545	3.99831	E5RGX5;Q93045;Q93045-2	E5RGX5;Q93045;Q93045-2	Stathmin;Stathmin-2	STMN2
5.545	4.82809	O15514;E9PB93;E9PHV4	O15514;E9PB93;E9PHV4	DNA-directed RNA polymerase II subunit RPB4	POLR2D
5.545	4.85494	Q13098;C9JFE4;Q13098-5;Q13098-7;Q13098-6	Q13098;C9JFE4;Q13098-5;Q13098-7;Q13098-6	COP9 signalosome complex subunit 1	GPS1
5.545	5.48763	P82909;D6R941	P82909	28S ribosomal protein S36, mitochondrial	MRPS36
5.545	6.00736	P30084	P30084	Enoyl-CoA hydratase, mitochondrial	ECHS1
5.545	5.13515	Q96QK1;I3L4S0;A0A1W2PP10;I3L4P4	Q96QK1	Vacuolar protein sorting-associated protein 35	VPS35
5.544	4.75887	P08240;P08240-2	P08240;P08240-2	Signal recognition particle receptor subunit alpha	SRPR
5.544	4.38737	Q12965;H0YNQ8;H0YLE5;H0YN00;H0YNB0;M0QXU2;M0QXE0	Q12965	Unconventional myosin-Ie	MYO1E
5.544	5.49618	Q14061;H7C4E5;C9J8T6	Q14061;H7C4E5;C9J8T6	Cytochrome c oxidase copper chaperone	COX17
5.544	4.8299	P11908-2;H7C540	P11908-2
5.543	4.67058	Q9P287;Q9P287-3	Q9P287;Q9P287-3	BRCA2 and CDKN1A-interacting protein	BCCIP
5.542	4.97068	Q7Z5R6;Q7Z5R6-2	Q7Z5R6	Amyloid beta A4 precursor protein-binding family B member 1-interacting protein	APBB1IP
5.541	2.09101	P50570-5;K7ENE7;K7EMR9	P50570-5
5.54	5.40756	X6RAL5;O00422;H7BZW6;U3KQ12;U3KPY7	X6RAL5;O00422;H7BZW6	Histone deacetylase complex subunit SAP18	SAP18
5.539	4.75382	O75400;O75400-2;F5H578;H7C2N3;F8VU11;Q6NWY9-2;Q6NWY9-3;Q6NWY9	O75400;O75400-2	Pre-mRNA-processing factor 40 homolog A	PRPF40A
5.539	4.41029	Q8NFH3;Q8NFH3-2;B4E301;F5H0E3;B4DVD1	Q8NFH3;Q8NFH3-2	Nucleoporin Nup43	NUP43
5.538	4.83538	Q13595;Q13595-3;Q13595-4;Q13595-2	Q13595;Q13595-3;Q13595-4;Q13595-2	Transformer-2 protein homolog alpha	TRA2A
5.538	4.18755	P52701;P52701-3;P52701-4;P52701-2;A0A087WWJ1;A0A087WYT6;F8WAX8;C9JH55;C9J8Y8;C9J7Y7;U3KQ72;F8W7G9	P52701;P52701-3;P52701-4;P52701-2;A0A087WWJ1	DNA mismatch repair protein Msh6	MSH6
5.537	4.51737	Q9GZZ9;E7EQ61;Q9GZZ9-2;E7EWE1;C9J5W5;C9JRV9;C9J0F6;D6RJC9	Q9GZZ9;E7EQ61;Q9GZZ9-2;E7EWE1;C9J5W5	Ubiquitin-like modifier-activating enzyme 5	UBA5
5.537	5.184	Q9NYB0;H3BMI8	Q9NYB0	Telomeric repeat-binding factor 2-interacting protein 1	TERF2IP
5.537	5.16936	O75955;O75955-2;A0A140T9R1;A2AB10;A0A140T9X0;A2AB09;A2AB12;A0A140T9W4;A0A140T959;A0A140T9C3;A2AB13;A0A0G2JJQ6;A2AB11;A0A140T974;A0A140T9B1;A0A140T957;A0A140T910;A0A140T905;A2ABJ5;A0A140T907	O75955;O75955-2;A0A140T9R1;A2AB10;A0A140T9X0;A2AB09;A2AB12	Flotillin-1	FLOT1
5.537	4.75981	P33176;C9JWB9	P33176	Kinesin-1 heavy chain	KIF5B
5.536	4.21677	P23258;Q9NRH3;K7EIS0;K7EKE5	P23258;Q9NRH3	Tubulin gamma-1 chain;Tubulin gamma-2 chain	TUBG1;TUBG2
5.536	5.15285	Q93009-3;Q93009;H3BND8;F5H2X1;H3BRA2;H3BUV0;H3BTM1;H3BQD1;I3L2D8;H3BMF6;REV__J3QKR9;REV__Q86YS3	Q93009-3;Q93009;H3BND8	Ubiquitin carboxyl-terminal hydrolase 7;Ubiquitin carboxyl-terminal hydrolase	USP7
5.536	4.54944	Q96GG9;C9JVE2;C9J8R4;C9JRU6;C9J0B2;C9JUW4;F8WC32;C9JRE2;C9JAV2;H7C216;Q6PH85-2;Q6PH85	Q96GG9;C9JVE2;C9J8R4	DCN1-like protein 1;DCN1-like protein	DCUN1D1
5.536	5.54442	Q7RTV0	Q7RTV0	PHD finger-like domain-containing protein 5A	PHF5A
5.534	4.74154	O95881;V9GY50;V9GYV4	O95881	Thioredoxin domain-containing protein 12	TXNDC12
5.532	4.72607	Q13123;E7EQZ7;D6REL4;D6RCQ4;D6RAY9;A0A0C4DGW5	Q13123;E7EQZ7	Protein Red	IK
5.532	4.83342	O00264;O00264-2	O00264;O00264-2	Membrane-associated progesterone receptor component 1	PGRMC1
5.531	5.01548	Q15121;Q15121-2;B1AKZ5	Q15121;Q15121-2;B1AKZ5	Astrocytic phosphoprotein PEA-15	PEA15
5.531	3.40146	Q13303-2;Q5TG80	Q13303-2;Q5TG80	Voltage-gated potassium channel subunit beta-2	KCNAB2
5.53	3.45397	Q96PZ0;E7EUH7;H0Y863	Q96PZ0;E7EUH7	Pseudouridylate synthase 7 homolog	PUS7
5.53	5.19244	Q9H307;Q9H307-2;G3V5F0;G3V579	Q9H307;Q9H307-2	Pinin	PNN
5.529	4.50268	Q15050	Q15050	Ribosome biogenesis regulatory protein homolog	RRS1
5.528	4.42691	Q15785	Q15785	Mitochondrial import receptor subunit TOM34	TOMM34
5.527	4.57483	P49247	P49247	Ribose-5-phosphate isomerase	RPIA
5.527	4.92748	Q13596;Q13596-2;Q13596-3;H0YK42;H0YKT3;H0YK58;H0YK43;J3KPH4;H0YKD5;H0YKL5	Q13596;Q13596-2;Q13596-3;H0YK42	Sorting nexin-1	SNX1
5.527	4.66079	Q9GZL7	Q9GZL7	Ribosome biogenesis protein WDR12	WDR12
5.527	4.65243	O75569;O75569-3;O75569-2;G5E9Q4;F8WEG8;C9JMM3	O75569;O75569-3;O75569-2;G5E9Q4	Interferon-inducible double-stranded RNA-dependent protein kinase activator A	PRKRA
5.525	4.63864	O43633;M0R1L7;M0R1T5;M0QXX8	O43633;M0R1L7;M0R1T5;M0QXX8	Charged multivesicular body protein 2a	CHMP2A
5.524	4.35643	P06239;P06239-3;Q573B4;P06239-2;E9PJ92;E9PAP0;F8W6B9;E9PKQ8	P06239;P06239-3;Q573B4;P06239-2;E9PJ92	Tyrosine-protein kinase Lck;Non-specific protein-tyrosine kinase	LCK		+
5.523	4.87101	E7EVA0;P27816-2;P27816-4;B5MEG9;H0Y2V1;F8W9U4;H7C456;A0A0J9YVV8;A0A0J9YW37;P27816-7;P27816-3	E7EVA0;P27816-2	Microtubule-associated protein;Microtubule-associated protein 4	MAP4
5.521	5.00556	Q9H0R4;K7ER15;K7EMY7;K7EQD2;K7EJQ8;A0A1B0GXB1;Q9H0R4-2;K7EKX8	Q9H0R4;K7ER15;K7EMY7;K7EQD2;K7EJQ8;A0A1B0GXB1;Q9H0R4-2	Haloacid dehalogenase-like hydrolase domain-containing protein 2	HDHD2
5.52	4.64143	Q9Y3C4;Q9Y3C4-3;Q9Y3C4-2	Q9Y3C4;Q9Y3C4-3;Q9Y3C4-2	EKC/KEOPS complex subunit TPRKB	TPRKB
5.52	5.15216	P38606;P38606-2;C9JVW8;C9JA17	P38606;P38606-2	V-type proton ATPase catalytic subunit A	ATP6V1A
5.519	4.9725	Q8TDP1;H0YEF3;E9PN81;H0YE52;H0YCP5;E9PKP0	Q8TDP1;H0YEF3;E9PN81;H0YE52;H0YCP5	Ribonuclease H2 subunit C	RNASEH2C
5.518	5.43014	Q9NQG5;A2A2M0;A0A087X2D2;E9PIQ9;E9PQF3;A0A087WUK3	Q9NQG5	Regulation of nuclear pre-mRNA domain-containing protein 1B	RPRD1B
5.517	4.85142	Q9BVK6	Q9BVK6	Transmembrane emp24 domain-containing protein 9	TMED9
5.517	3.70771	G3V5T9;P24941;P24941-2;E7ESI2;G3V317;K7EJ83	G3V5T9;P24941;P24941-2;E7ESI2	Cyclin-dependent kinase 2	CDK2
5.517	4.82921	P36543;P36543-3;P36543-2;C9J8H1;Q96A05	P36543;P36543-3;P36543-2;C9J8H1	V-type proton ATPase subunit E 1	ATP6V1E1
5.516	4.95835	Q96AB3;Q96AB3-2;K7EKW4;K7ENV7;Q96AB3-3	Q96AB3;Q96AB3-2;K7EKW4;K7ENV7;Q96AB3-3	Isochorismatase domain-containing protein 2, mitochondrial	ISOC2
5.515	5.71084	O60749;O60749-2;D6RC15	O60749;O60749-2	Sorting nexin-2	SNX2
5.514	5.24716	Q32MZ4-2;Q32MZ4-3;Q32MZ4;Q32MZ4-4;C9JTC6	Q32MZ4-2;Q32MZ4-3;Q32MZ4	Leucine-rich repeat flightless-interacting protein 1	LRRFIP1
5.514	2.7982	O95758-1	O95758-1	Polypyrimidine tract-binding protein 3	PTBP3
5.513	5.10441	Q6UXN9;C9JBU3	Q6UXN9	WD repeat-containing protein 82	WDR82
5.513	3.89687	Q9NVP2;K7ES22;K7ELW9;K7EIL9;K7EM93	Q9NVP2;K7ES22	Histone chaperone ASF1B	ASF1B
5.513	5.12019	O43583;F8VVL1	O43583;F8VVL1	Density-regulated protein	DENR
5.513	3.98475	P26358;P26358-2;P26358-3;K7ENW7;K7EJL0;K7EMU8;K7EIZ6;K7EP77	P26358;P26358-2;P26358-3	DNA (cytosine-5)-methyltransferase 1	DNMT1
5.512	4.51463	Q9NQW7-3;Q9NQW7-4;Q9NQW7;Q9NQW7-2;Q5T6H7;Q5T6H2;Q5T6H3	Q9NQW7-3;Q9NQW7-4;Q9NQW7;Q9NQW7-2;Q5T6H7	Xaa-Pro aminopeptidase 1	XPNPEP1
5.512	3.91505	Q9H0P0-1;Q9H0P0-2;B9A035	Q9H0P0-1;Q9H0P0-2;B9A035	Cytosolic 5-nucleotidase 3A	NT5C3A
5.51	5.74539	Q00059;Q00059-2;H7BYN3	Q00059;Q00059-2;H7BYN3	Transcription factor A, mitochondrial	TFAM
5.51	3.97817	Q96A49	Q96A49	Synapse-associated protein 1	SYAP1
5.509	4.85493	Q9Y3Z3;Q9Y3Z3-4;Q9Y3Z3-3	Q9Y3Z3;Q9Y3Z3-4;Q9Y3Z3-3	Deoxynucleoside triphosphate triphosphohydrolase SAMHD1	SAMHD1
5.509	4.71817	J3KQ48;Q9Y3E5	J3KQ48;Q9Y3E5	Peptidyl-tRNA hydrolase 2, mitochondrial	PTRH2
5.509	5.06259	Q9NWV4	Q9NWV4	UPF0587 protein C1orf123	C1orf123
5.509	4.95759	Q14331;E9PLY7;E9PRR7;J3KSQ7;E9PI42	Q14331;E9PLY7	Protein FRG1	FRG1
5.508	4.85697	Q9NY33;G3V1D3;G3V180;Q9NY33-4;Q9NY33-2;E9PQ14;E9PPK9;E9PKK8;E9PNX5;E9PQF2	Q9NY33;G3V1D3;G3V180;Q9NY33-4	Dipeptidyl peptidase 3	DPP3
5.507	NaN	Q969G6;H7C4G0	Q969G6	Riboflavin kinase	RFK
5.506	3.0033	O60678;A0A0A0MSN7;O60678-2	O60678;A0A0A0MSN7;O60678-2	Protein arginine N-methyltransferase 3	PRMT3
5.506	4.43822	Q06203;D6RCC8;D6RE15	Q06203	Amidophosphoribosyltransferase	PPAT
5.506	NaN	P12532;P12532-2;F8WCN3;C9JSQ1;C9JT96;C9J6W7;C9J995;C9J8F6;C9JJX8;P17540	P12532;P12532-2;F8WCN3	Creatine kinase U-type, mitochondrial	CKMT1A;CKMT1B
5.506	4.11008	O43709;O43709-3;H7C0G4;F8WD87;F8WD67;E9PCQ7;O43709-2;H7C170;F8VZ18;B3KR83;F2Z3D9	O43709;O43709-3	Probable 18S rRNA (guanine-N(7))-methyltransferase	WBSCR22
5.506	5.07809	Q14696;H0YLI4;Q14696-2	Q14696	LDLR chaperone MESD	MESDC2
5.505	5.59178	Q14980;Q14980-4;Q14980-3;Q14980-5;F5H4J1;F5H6Y5;F5H763;F5H0Z7;F5H2F3;F5H3L6;F5GZW1;F5H1L0;F8W6T3;F5GWK2;F5H073;F5H068;F5H7R5;F5H4Y4;F5GWA2	Q14980;Q14980-4;Q14980-3	Nuclear mitotic apparatus protein 1	NUMA1
5.505	5.59343	P10644;P10644-2;K7EPB2;K7EM13;K7EMZ6;K7EIE5;K7EID3;K7EJ40;K7EK41;K7EMU2;K7EQK3;X6RAV4;K7EPR5	P10644;P10644-2;K7EPB2	cAMP-dependent protein kinase type I-alpha regulatory subunit;cAMP-dependent protein kinase type I-alpha regulatory subunit, N-terminally processed	PRKAR1A
5.505	4.47144	P23511-2;P23511	P23511-2;P23511	Nuclear transcription factor Y subunit alpha	NFYA
5.503	4.97801	O00743;O00743-3;O00743-2;Q5T1S7	O00743;O00743-3;O00743-2	Serine/threonine-protein phosphatase 6 catalytic subunit;Serine/threonine-protein phosphatase 6 catalytic subunit, N-terminally processed	PPP6C
5.502	4.80639	Q6FI81;Q6FI81-3;H3BV90;H3BT65;H3BUG4;H3BPG7;H3BQ23;Q6FI81-2;H3BTZ8;H3BTT4	Q6FI81;Q6FI81-3;H3BV90;H3BT65;H3BUG4	Anamorsin	CIAPIN1
5.502	4.62961	Q9NRG0;H0YBP8;E5RGS9	Q9NRG0;H0YBP8	Chromatin accessibility complex protein 1	CHRAC1
5.501	5.01385	P49756;P49756-2;P49756-3;E9PQU5;H0YE46;E9PSE8;P49756-4	P49756	RNA-binding protein 25	RBM25
5.501	4.94197	O75431;O75431-2;C9JAZ1;C9JNK6;F8WE26	O75431;O75431-2;C9JAZ1;C9JNK6	Metaxin-2	MTX2
5.5	4.73088	P53992;G5EA31;P53992-2;A0A0U1RR49	P53992;G5EA31	Protein transport protein Sec24C	SEC24C
5.5	4.7311	Q9UNP9;Q9UNP9-2;Q9UNP9-3;E9PEQ6;E9PK21	Q9UNP9;Q9UNP9-2;Q9UNP9-3;E9PEQ6	Peptidyl-prolyl cis-trans isomerase E;Peptidyl-prolyl cis-trans isomerase	PPIE
5.497	4.81755	Q9BZE4;Q9BZE4-2;Q9BZE4-3;Q5T3R7	Q9BZE4;Q9BZE4-2;Q9BZE4-3	Nucleolar GTP-binding protein 1	GTPBP4
5.497	5.27614	Q9Y2Q5;Q9Y2Q5-2;Q9Y2Q5-3	Q9Y2Q5;Q9Y2Q5-2;Q9Y2Q5-3	Ragulator complex protein LAMTOR2	LAMTOR2
5.496	3.11734	A0A087WVR3;A0A087WTW0;Q96T88;Q96T88-2;A0A087WWG9	A0A087WVR3;A0A087WTW0;Q96T88;Q96T88-2;A0A087WWG9	E3 ubiquitin-protein ligase UHRF1	UHRF1
5.495	4.28986	Q53FT3;A0A087WYW7;E9PPG8;E9PJB2	Q53FT3;A0A087WYW7;E9PPG8	Protein Hikeshi	C11orf73
5.495	4.99054	Q8TEM1;Q8TEM1-2	Q8TEM1	Nuclear pore membrane glycoprotein 210	NUP210
5.494	4.43808	Q5BKZ1;A0A0A0MRN4;Q5BKZ1-3;Q5BKZ1-2;E2QRN4	Q5BKZ1;A0A0A0MRN4;Q5BKZ1-3	DBIRD complex subunit ZNF326	ZNF326
5.494	4.24695	O95478;A0A0A0MQZ6;H0YAI9	O95478;A0A0A0MQZ6	Ribosome biogenesis protein NSA2 homolog	NSA2
5.494	NaN	E2QRF9;O75496;H7C608;C9K0U5	E2QRF9;O75496;H7C608	Geminin	GMNN
5.493	4.91529	Q92530;Q5QPM7;Q5QPM9;H0Y555;F5H4Z3	Q92530;Q5QPM7;Q5QPM9	Proteasome inhibitor PI31 subunit	PSMF1
5.492	3.61242	A0A0B4J2D5;P30042;H7C1F6;A0A0B4J2H4;P30042-2;F2Z2Q0;A0A096LP12	A0A0B4J2D5;P30042;H7C1F6;A0A0B4J2H4;P30042-2	ES1 protein homolog, mitochondrial	C21orf33
5.492	5.52562	P40306;J3QQN1;J3QL48	P40306	Proteasome subunit beta type-10	PSMB10
5.492	4.66394	Q9UKF6;G5E9W3;C9JZH6	Q9UKF6;G5E9W3	Cleavage and polyadenylation specificity factor subunit 3	CPSF3
5.491	5.04228	H0Y9X1;Q96EY4;D6RA57;D6RE67;D6RC31	H0Y9X1;Q96EY4;D6RA57	Translation machinery-associated protein 16	TMA16
5.491	5.20993	Q6P2Q9;I3L0J9;I3L3Z8;I3L1T8	Q6P2Q9	Pre-mRNA-processing-splicing factor 8	PRPF8
5.489	5.54727	Q9NY12-2;Q9NY12	Q9NY12-2;Q9NY12	H/ACA ribonucleoprotein complex subunit 1	GAR1
5.489	4.89395	Q96HS1;Q96HS1-2;F5GXG4	Q96HS1;Q96HS1-2	Serine/threonine-protein phosphatase PGAM5, mitochondrial	PGAM5
5.489	5.45097	O76021;J3QSV6;I3L3U9;I3L3C4;O76021-2;I3L234;J3KPU7;I3L2F2;I3L4T8;I3L1Y4;I3L1A3	O76021;J3QSV6;I3L3U9	Ribosomal L1 domain-containing protein 1	RSL1D1
5.488	5.16839	Q9UNH7;A0A0A0MRI2;Q9UNH7-2;G3V5X9;H0YJF8;G3V4Z5;Q86XE0-2;Q86XE0;G3V2U1;G3V5U2	Q9UNH7;A0A0A0MRI2;Q9UNH7-2;G3V5X9	Sorting nexin-6;Sorting nexin-6, N-terminally processed	SNX6
5.487	4.60107	Q96EY1-2;Q96EY1-3	Q96EY1-2;Q96EY1-3	DnaJ homolog subfamily A member 3, mitochondrial	DNAJA3
5.487	4.45019	P12074	P12074	Cytochrome c oxidase subunit 6A1, mitochondrial	COX6A1
5.486	3.72632	Q969U7-2;Q969U7;K7ENR6;V9GZ55;K7ER45	Q969U7-2;Q969U7;K7ENR6;V9GZ55	Proteasome assembly chaperone 2	PSMG2
5.486	4.41485	F5GWH5;P61165	F5GWH5;P61165	Transmembrane protein 258	TMEM258
5.486	4.7202	Q9HAV0;C9JD14;H7C5J5	Q9HAV0	Guanine nucleotide-binding protein subunit beta-4	GNB4
5.485	NaN	Q53GG5-2;A0A0A0MQY0;Q53GG5-3;Q53GG5;A0A087WYF8;D6RAF1	Q53GG5-2;A0A0A0MQY0;Q53GG5-3;Q53GG5	PDZ and LIM domain protein 3	PDLIM3
5.485	4.73186	Q8IWX8;J3QK89	Q8IWX8;J3QK89	Calcium homeostasis endoplasmic reticulum protein	CHERP
5.485	4.94484	Q15424;Q15424-4;Q15424-3;Q15424-2;K7EII0;K7ES42	Q15424;Q15424-4;Q15424-3;Q15424-2	Scaffold attachment factor B1	SAFB
5.485	4.49771	Q9Y3B8-3	Q9Y3B8-3	Oligoribonuclease, mitochondrial	REXO2
5.485	5.14817	Q9Y3C6	Q9Y3C6	Peptidyl-prolyl cis-trans isomerase-like 1	PPIL1
5.484	3.89109	Q06210-2;Q06210;O94808;E5RJP4	Q06210-2;Q06210	Glutamine--fructose-6-phosphate aminotransferase [isomerizing] 1	GFPT1
5.484	4.29782	Q9Y3D0;J3KS95;H3BNV7;J3QLT9	Q9Y3D0	Mitotic spindle-associated MMXD complex subunit MIP18	FAM96B
5.484	4.75901	Q92734-2;Q92734;Q92734-4;Q92734-3;C9JJP5;C9JUE0;C9JTY3	Q92734-2;Q92734;Q92734-4;Q92734-3;C9JJP5;C9JUE0;C9JTY3	Protein TFG	TFG
5.484	4.02722	Q8N335;C9JFA7;C9JM46;C9K0P5;P21695-2;P21695	Q8N335;C9JFA7;C9JM46	Glycerol-3-phosphate dehydrogenase 1-like protein;Glycerol-3-phosphate dehydrogenase [NAD(+)]	GPD1L
5.482	4.49233	Q16186;A0A087WX59;A0A087WUX6	Q16186	Proteasomal ubiquitin receptor ADRM1	ADRM1
5.482	4.07306	Q9Y316;Q9Y316-3;Q9Y316-2;B5MCI6	Q9Y316;Q9Y316-3;Q9Y316-2	Protein MEMO1	MEMO1
5.482	4.44009	P55957;P55957-2;P55957-4;B2ZP78;P55957-3	P55957;P55957-2;P55957-4	BH3-interacting domain death agonist;BH3-interacting domain death agonist p15;BH3-interacting domain death agonist p13;BH3-interacting domain death agonist p11	BID
5.482	5.10846	P43034;I3L3N5;P43034-2;I3L495	P43034	Platelet-activating factor acetylhydrolase IB subunit alpha	PAFAH1B1
5.482	5.20947	O43676;C9JKQ2	O43676;C9JKQ2	NADH dehydrogenase [ubiquinone] 1 beta subcomplex subunit 3	NDUFB3
5.481	4.72466	P42285;H0YAC4;H0Y8U3;D6REC7	P42285	Superkiller viralicidic activity 2-like 2	SKIV2L2
5.48	5.19645	O95168;C9JXQ9;O95168-2;F2Z3P9	O95168;C9JXQ9;O95168-2;F2Z3P9	NADH dehydrogenase [ubiquinone] 1 beta subcomplex subunit 4	NDUFB4
5.48	NaN	Q9NPD8	Q9NPD8	Ubiquitin-conjugating enzyme E2 T	UBE2T
5.479	5.67044	P36957;P36957-2;Q86SW4;H0YJF9;G3V3F0;G3V5M3	P36957;P36957-2	Dihydrolipoyllysine-residue succinyltransferase component of 2-oxoglutarate dehydrogenase complex, mitochondrial	DLST
5.479	4.49505	C9JIF9;P13798;H7C393;H7C1U0;C9JLK2;F8WEH5;H0YFE5	C9JIF9;P13798	Acylamino-acid-releasing enzyme	APEH
5.479	5.03712	Q9Y6H1;Q5T1J5	Q9Y6H1;Q5T1J5	Coiled-coil-helix-coiled-coil-helix domain-containing protein 2;Putative coiled-coil-helix-coiled-coil-helix domain-containing protein CHCHD2P9, mitochondrial	CHCHD2;CHCHD2P9
5.478	NaN	Q92888-4	Q92888-4
5.478	5.25896	P07948;E5RJ37	P07948	Tyrosine-protein kinase Lyn	LYN		+
5.477	4.97274	A0A087WW40;Q9Y371;Q9Y371-2;Q9Y371-3	A0A087WW40;Q9Y371;Q9Y371-2;Q9Y371-3	Endophilin-B1	SH3GLB1
5.477	4.20832	K7EMC9;Q969T9;B4DFG2;A6NG10;K7ENL2;K7EIJ0;K7EIN1;K7ESN4;K7EIK1	K7EMC9;Q969T9;B4DFG2;A6NG10;K7ENL2;K7EIJ0	WW domain-binding protein 2	WBP2
5.476	4.65049	Q08752;H0Y8J0	Q08752	Peptidyl-prolyl cis-trans isomerase D	PPID
5.475	4.76432	O00273;K7ERT1	O00273	DNA fragmentation factor subunit alpha	DFFA
5.475	4.60013	P57088;D6RAA6;H0Y8N0;J3KN43;D6RBY2	P57088;D6RAA6	Transmembrane protein 33	TMEM33
5.474	5.10241	A0AVT1;A0AVT1-2;A0AVT1-3;A0AVT1-4;H0Y8S8;H0Y9U5	A0AVT1;A0AVT1-2	Ubiquitin-like modifier-activating enzyme 6	UBA6
5.474	5.25516	H7C2Q8;Q99848	H7C2Q8;Q99848	Probable rRNA-processing protein EBP2	EBNA1BP2
5.473	4.70171	Q9NRR3;D6REL0	Q9NRR3;D6REL0	CDC42 small effector protein 2	CDC42SE2
5.473	3.94003	Q04864-2;Q04864	Q04864-2;Q04864	Proto-oncogene c-Rel	REL
5.473	4.00977	P48449;P48449-3;P48449-2;A0A0G2JQD0;C9J315;H7C3A5;A0A0G2JS81	P48449;P48449-3;P48449-2;A0A0G2JQD0	Lanosterol synthase	LSS
5.473	NaN	O95197-3;B7Z4M1;O95197-6;O95197-5	O95197-3;B7Z4M1;O95197-6;O95197-5	Reticulon-3;Reticulon	RTN3
5.472	4.76128	Q8TBC4;Q8TBC4-2;F8W8D4;F8WF86	Q8TBC4;Q8TBC4-2;F8W8D4	NEDD8-activating enzyme E1 catalytic subunit	UBA3
5.472	5.06977	O76094;O76094-2;R4GNC1;D6RDY6	O76094;O76094-2	Signal recognition particle subunit SRP72	SRP72
5.472	4.55479	Q9Y5A9;Q9Y5A9-2;S4R3V3;S4R3J8	Q9Y5A9;Q9Y5A9-2	YTH domain-containing family protein 2	YTHDF2
5.472	5.20919	P46087;P46087-4;P46087-2;P46087-3;F5GWB7;F5H709;F5H5X6;F5GYR3;F5H359;F5H8G6	P46087;P46087-4;P46087-2;P46087-3	Probable 28S rRNA (cytosine(4447)-C(5))-methyltransferase	NOP2
5.472	4.3742	P63172;Q5VTU3	P63172;Q5VTU3	Dynein light chain Tctex-type 1	DYNLT1
5.471	3.99719	Q0VDF9;H7C2A1;B0YIZ1	Q0VDF9	Heat shock 70 kDa protein 14	HSPA14
5.471	5.3872	Q96IU4;F8W9U3;B4DQI4;Q96IU4-2	Q96IU4;F8W9U3;B4DQI4	Alpha/beta hydrolase domain-containing protein 14B	ABHD14B
5.47	NaN	Q8WXC6	Q8WXC6	Myeloma-overexpressed gene 2 protein	MYEOV2
5.469	5.22447	P16455	P16455	Methylated-DNA--protein-cysteine methyltransferase	MGMT
5.468	5.31022	Q9P0J0;Q9P0J0-2	Q9P0J0;Q9P0J0-2	NADH dehydrogenase [ubiquinone] 1 alpha subcomplex subunit 13	NDUFA13
5.468	5.2565	Q9Y6M9;E9PH64;E7EWZ0;E9PF49	Q9Y6M9;E9PH64;E7EWZ0;E9PF49	NADH dehydrogenase [ubiquinone] 1 beta subcomplex subunit 9	NDUFB9
5.468	5.32138	P28331;P28331-2;P28331-4;P28331-5;B4DJ81;P28331-3;C9JPQ5;F8WDL5	P28331;P28331-2;P28331-4;P28331-5;B4DJ81;P28331-3	NADH-ubiquinone oxidoreductase 75 kDa subunit, mitochondrial	NDUFS1
5.468	5.73002	P49006	P49006	MARCKS-related protein	MARCKSL1
5.467	4.45008	Q9NZZ3;Q9NZZ3-2	Q9NZZ3;Q9NZZ3-2	Charged multivesicular body protein 5	CHMP5
5.467	4.36163	Q8NI22;Q8NI22-2;Q8NI22-3;H7BZ18	Q8NI22;Q8NI22-2;Q8NI22-3;H7BZ18	Multiple coagulation factor deficiency protein 2	MCFD2
5.467	4.46315	Q9Y5J1;J3KSR7;J3QR85;J3QRG0;J3QLD6;F6VJE8	Q9Y5J1	U3 small nucleolar RNA-associated protein 18 homolog	UTP18
5.466	5.39912	Q14683;G8JLG1;H0Y7K8;V9GY57;V9GYN9	Q14683;G8JLG1	Structural maintenance of chromosomes protein 1A;Structural maintenance of chromosomes protein	SMC1A
5.466	4.54938	Q86WR0;Q86WR0-2;G3V121;B7Z2L8;Q0VGD4	Q86WR0;Q86WR0-2	Coiled-coil domain-containing protein 25	CCDC25
5.466	4.87165	Q9Y5K5-2;Q9Y5K5-4;Q9Y5K5-3;Q5LJA5;Q5LJB0;H0Y636;H0Y4K0	Q9Y5K5-2;Q9Y5K5-4;Q9Y5K5-3;Q5LJA5;Q5LJB0	Ubiquitin carboxyl-terminal hydrolase isozyme L5;Ubiquitin carboxyl-terminal hydrolase	UCHL5
5.465	3.88611	Q8N6M0;A0A087X0W9;Q8N6M0-2;A0A0C4DH76	Q8N6M0;A0A087X0W9;Q8N6M0-2	OTU domain-containing protein 6B	OTUD6B
5.465	4.7339	P09417;P09417-2;B7Z415;D6RGG7;H0Y8F7;D6RHJ7	P09417;P09417-2;B7Z415;D6RGG7	Dihydropteridine reductase	QDPR
5.464	4.07997	O00560;O00560-3;B4DHN5;E9PBU7	O00560;O00560-3;B4DHN5;E9PBU7	Syntenin-1	SDCBP
5.464	4.56781	Q05048;A0A0A0MSZ9;A3KFI9	Q05048;A0A0A0MSZ9	Cleavage stimulation factor subunit 1	CSTF1
5.464	3.83958	Q9BUF5;K7ESM5;K7ES63;K7EK43;K7ESQ3;K7EQT3;K7EJ64;K7ERA8;K7EJZ4;K7EL29;K7EN98;K7EPE5	Q9BUF5;K7ESM5	Tubulin beta-6 chain	TUBB6
5.462	4.43049	Q9BVI4;F5H303	Q9BVI4	Nucleolar complex protein 4 homolog	NOC4L
5.462	3.60828	Q6NXE6;Q6NXE6-2;B4E1N1;F5H4P3;F5GWV0;H0YH65;F5H2K4;H0YGL0;F5H2X2;F5H052;F5H3X1;F5H6J3;F5GZP0;H0YGQ5;F5H7V0	Q6NXE6;Q6NXE6-2;B4E1N1;F5H4P3	Armadillo repeat-containing protein 6	ARMC6
5.461	4.46891	P51570;P51570-2;K7ERJ9;K7EII7;K7ERN9	P51570;P51570-2	Galactokinase	GALK1
5.461	4.86573	Q4G176;F5H5A1;F5H2G6;F5H755;F5H362;F5GX20;H0YGC7;F5H3B2;H0YH37;H0YGJ0	Q4G176;F5H5A1;F5H2G6	Acyl-CoA synthetase family member 3, mitochondrial	ACSF3
5.461	4.95665	Q96RU3-5;Q96RU3-2;Q96RU3-3;Q96RU3;H0Y7W6	Q96RU3-5;Q96RU3-2;Q96RU3-3;Q96RU3;H0Y7W6	Formin-binding protein 1	FNBP1
5.46	5.22497	Q16822;B4DW73;H0YML5;P35558;P35558-2	Q16822;B4DW73;H0YML5	Phosphoenolpyruvate carboxykinase [GTP], mitochondrial	PCK2
5.459	5.18523	Q15427;Q5SZ64	Q15427;Q5SZ64	Splicing factor 3B subunit 4	SF3B4
5.459	4.6819	Q9UQ13;Q9UQ13-2;X6RI37	Q9UQ13;Q9UQ13-2;X6RI37	Leucine-rich repeat protein SHOC-2	SHOC2
5.458	2.94935	P52789;E9PB90	P52789;E9PB90	Hexokinase-2;Hexokinase	HK2
5.458	5.04534	Q9Y2D5;Q9Y2D5-5;Q9Y2D5-6;Q9Y2D5-7;Q9Y2D5-4;C9JVY5	Q9Y2D5;Q9Y2D5-5;Q9Y2D5-6;Q9Y2D5-7;Q9Y2D5-4;C9JVY5	A-kinase anchor protein 2	AKAP2
5.457	4.59925	Q9Y5P6;Q9Y5P6-2	Q9Y5P6;Q9Y5P6-2	Mannose-1-phosphate guanyltransferase beta	GMPPB
5.456	5.06984	Q01658	Q01658	Protein Dr1	DR1
5.456	4.50354	J3QLS3;Q9Y2R9;J3QQS1;J3KSI8;J3QKW2	J3QLS3;Q9Y2R9;J3QQS1;J3KSI8;J3QKW2	28S ribosomal protein S7, mitochondrial	MRPS7
5.456	4.34138	Q9BQ67;M0QX71	Q9BQ67;M0QX71	Glutamate-rich WD repeat-containing protein 1	GRWD1
5.455	4.95525	P54725-2;P54725;K7ENJ0;K7ELW1;K7EQ16;K7ELU6	P54725-2;P54725;K7ENJ0;K7ELW1	UV excision repair protein RAD23 homolog A	RAD23A
5.455	5.02623	Q8N5K1;D6RCF4;I3L1N9	Q8N5K1;D6RCF4	CDGSH iron-sulfur domain-containing protein 2	CISD2
5.455	4.98171	Q9H8Y8;Q9H8Y8-3;Q9H8Y8-2	Q9H8Y8;Q9H8Y8-3;Q9H8Y8-2	Golgi reassembly-stacking protein 2	GORASP2
5.454	5.0891	P51659;P51659-3;E7EWE5;P51659-2;G5E9S2;E7ET17;E7ER27;E7EPL9	P51659;P51659-3;E7EWE5;P51659-2;G5E9S2;E7ET17;E7ER27;E7EPL9	Peroxisomal multifunctional enzyme type 2;(3R)-hydroxyacyl-CoA dehydrogenase;Enoyl-CoA hydratase 2	HSD17B4
5.454	4.77323	Q99614;H0YB37	Q99614	Tetratricopeptide repeat protein 1	TTC1
5.454	4.64656	Q92890;Q92890-1;Q92890-3;C9JNP9;C9IZG3;C9J6N9	Q92890;Q92890-1;Q92890-3	Ubiquitin fusion degradation protein 1 homolog	UFD1L
5.454	4.18394	Q9Y570;Q9Y570-4;Q9Y570-2;Q9Y570-3	Q9Y570;Q9Y570-4;Q9Y570-2	Protein phosphatase methylesterase 1	PPME1
5.453	4.50527	Q13952;Q13952-5;Q13952-3;Q5T6K7;E9PI99;Q13952-6;Q13952-7;Q13952-2;Q13952-4;A0A0A0MT00;E9PQR2;E9PJA8;E9PL11	Q13952;Q13952-5;Q13952-3;Q5T6K7;E9PI99;Q13952-6;Q13952-7;Q13952-2;Q13952-4;A0A0A0MT00	Nuclear transcription factor Y subunit gamma	NFYC
5.452	4.46338	O60684;Q5TFJ7;S4R3E5	O60684;Q5TFJ7	Importin subunit alpha-7	KPNA6
5.452	4.18895	Q13616;A0A0C4DGX4;Q8NI38-2	Q13616;A0A0C4DGX4	Cullin-1	CUL1
5.452	5.57278	J3KNL2;Q8WYJ6;Q8WYJ6-2;I3L2M1;J3QRU3;A0A087WWZ5;J3QLR2;J3QLA8;E7EQM7;O43236-6;E7EPG2;E7EX32;G3XAH0;Q99719-2;Q99719	J3KNL2;Q8WYJ6	Septin-1	2018-09-01
5.451	4.26539	Q9Y5J9;G3XAN8;E9PIR3	Q9Y5J9;G3XAN8	Mitochondrial import inner membrane translocase subunit Tim8 B	TIMM8B
5.451	4.69484	P29144	P29144	Tripeptidyl-peptidase 2	TPP2
5.451	4.76317	Q9NTZ6;Q5JX62;A6PVI1;A6PVI0	Q9NTZ6	RNA-binding protein 12	RBM12
5.451	4.4231	K7ES61;Q9BYD3;X6RAY8;Q9BYD3-2;K7ELQ0;K7EKI4;K7ELF1;K7EJ73	K7ES61;Q9BYD3;X6RAY8;Q9BYD3-2;K7ELQ0;K7EKI4;K7ELF1	39S ribosomal protein L4, mitochondrial	MRPL4
5.451	4.73428	B7Z6D5;Q96GQ7;A0A087X059;A0A087WYH5	B7Z6D5;Q96GQ7	Probable ATP-dependent RNA helicase DDX27	DDX27
5.45	3.74384	Q9ULX3;H3BUR4	Q9ULX3	RNA-binding protein NOB1	NOB1
5.45	4.99766	P16220;P16220-3;P16220-2;C9J4L5;C9JBT4;H7C3I0;E7EWP8;C9J896;C9J276;H7C1R5	P16220;P16220-3;P16220-2;C9J4L5;C9JBT4;H7C3I0;E7EWP8;C9J896	Cyclic AMP-responsive element-binding protein 1	CREB1
5.45	4.38983	Q53H82	Q53H82	Beta-lactamase-like protein 2	LACTB2
5.45	4.35528	Q9GZU8;H3BP64;H3BUL4;H3BMX9;H3BTP8;H3BSY6;H3BTI2;H3BQQ6;Q6P4H7;H3BSF0;H3BU93;H3BN22;H3BPF9;H3BNK9;H3BPH9	Q9GZU8;H3BP64;H3BUL4;H3BMX9;H3BTP8;H3BSY6;H3BTI2;H3BQQ6;Q6P4H7;H3BSF0;H3BU93	Protein FAM192A	FAM192A;NIP30
5.449	5.08411	Q9H2H8;H7BZ14;B8ZZ77;Q9H2H8-2;C9K058;F8WC82;C9J4N2	Q9H2H8;H7BZ14;B8ZZ77;Q9H2H8-2;C9K058	Peptidyl-prolyl cis-trans isomerase-like 3;Peptidyl-prolyl cis-trans isomerase	PPIL3
5.449	5.08983	Q4VC31;C9JQ41;H7C525;C9JBU9	Q4VC31;C9JQ41;H7C525	Coiled-coil domain-containing protein 58	CCDC58
5.448	4.80025	Q9UHB9;Q9UHB9-4;Q9UHB9-2;Q9UHB9-3;K7EN53;K7EQC2	Q9UHB9;Q9UHB9-4;Q9UHB9-2	Signal recognition particle subunit SRP68	SRP68
5.448	3.95315	P49005;A0A087WWF6;F8W8R3;C9JLE1;C9IZD2;C9J8Z7;C9JHC7;H7C1B3	P49005;A0A087WWF6;F8W8R3;C9JLE1;C9IZD2;C9J8Z7	DNA polymerase delta subunit 2	POLD2
5.448	4.47081	O15160;O15160-2;E7EQB9;H0Y723;D6RDJ3;REV__P58340-2	O15160;O15160-2;E7EQB9;H0Y723	DNA-directed RNA polymerases I and III subunit RPAC1	POLR1C
5.448	4.59747	Q96CN7;D6RGE2	Q96CN7	Isochorismatase domain-containing protein 1	ISOC1
5.448	4.37602	Q9H223;Q9NZN4-2	Q9H223	EH domain-containing protein 4	EHD4
5.447	5.14055	P53990;P53990-4;P53990-2;P53990-5;H3BMU1;H3BUI0;P53990-3;H3BQF7;J3KR23;F5GXM3;P53990-6;H3BRE2;H3BPP6;H3BQ38;E9PF00	P53990;P53990-4;P53990-2;P53990-5;H3BMU1;H3BUI0;P53990-3;H3BQF7;J3KR23	IST1 homolog	IST1
5.446	4.98861	Q96BX8;K7ESA9;K7EPX7;K7EKK6;K7ELS3;K7ESI3;Q86TA1	Q96BX8;K7ESA9;K7EPX7;K7EKK6;K7ELS3	MOB kinase activator 3A	MOB3A
5.446	4.97196	Q9H0D6;Q9H0D6-2	Q9H0D6;Q9H0D6-2	5-3 exoribonuclease 2	XRN2
5.445	3.9693	Q9BSJ8;Q9BSJ8-2;F8VZB1	Q9BSJ8;Q9BSJ8-2	Extended synaptotagmin-1	ESYT1
5.444	4.49147	P52888;K7EP46;K7EL02;P52888-2;K7EMU4;K7EIK4;K7EL32	P52888;K7EP46	Thimet oligopeptidase	THOP1
5.444	4.85892	Q96EE3-1;Q96EE3;K7ELV2;K7EP88;K7ENI5;K7EPZ5	Q96EE3-1;Q96EE3;K7ELV2;K7EP88	Nucleoporin SEH1	SEH1L
5.444	4.76033	Q8TDN6	Q8TDN6	Ribosome biogenesis protein BRX1 homolog	BRIX1
5.444	4.21862	H0YIV9;O43716;F8VRU3;J3KMY1	H0YIV9;O43716;F8VRU3	Glutamyl-tRNA(Gln) amidotransferase subunit C, mitochondrial	GATC
5.444	4.34601	Q9Y6B6;Q9H029;D6RD69;D6R9R5;D6RDB2;D6RAA2;X1WI22	Q9Y6B6;Q9H029;D6RD69;D6R9R5	GTP-binding protein SAR1b	SAR1B;DKFZp434B2017
5.443	5.29346	P55809;E9PDW2;P55809-2;Q9BYC2	P55809;E9PDW2	Succinyl-CoA:3-ketoacid coenzyme A transferase 1, mitochondrial	OXCT1
5.443	4.56284	W5RWE6;Q7Z7A4;Q7Z7A4-2;Q7Z7A4-4;H7BYG4;A0A0C4DG95;Q7Z7A4-6;E9PD56;Q7Z7A4-7;Q7Z7A4-5;H7C4V0;Q7Z7A4-3;F8WDF7;C9IYJ2;U3KQS4;H7C529;F8WAW8;H7C4W2	W5RWE6;Q7Z7A4;Q7Z7A4-2;Q7Z7A4-4;H7BYG4;A0A0C4DG95;Q7Z7A4-6;E9PD56;Q7Z7A4-7;Q7Z7A4-5	PX domain-containing protein kinase-like protein	PXK
5.442	4.79593	A0A087WUB9;Q8WYA6;Q8WYA6-4;Q8WYA6-2;Q8WYA6-3;A2A2P1	A0A087WUB9;Q8WYA6;Q8WYA6-4;Q8WYA6-2;Q8WYA6-3	Beta-catenin-like protein 1	CTNNBL1
5.441	4.93384	Q9NQR4;H7C579;F8WF70	Q9NQR4;H7C579	Omega-amidase NIT2	NIT2
5.44	5.13513	O94925;H7BZD1;C9JIJ6;B7Z509;H7C201;O94925-2	O94925	Glutaminase kidney isoform, mitochondrial	GLS
5.44	5.09188	O00764;F2Z2Y4;O00764-3;O00764-2;A8MV33	O00764;F2Z2Y4;O00764-3;O00764-2	Pyridoxal kinase	PDXK
5.44	4.80705	Q13618;Q13618-2;Q13618-3;A0A087WTG3;H7C399;H7C1L6;A0A087X1R9	Q13618;Q13618-2;Q13618-3;A0A087WTG3	Cullin-3	CUL3
5.44	4.65766	Q9H6F5;H0YG79;Q9H6F5-2	Q9H6F5	Coiled-coil domain-containing protein 86	CCDC86
5.439	4.79541	P62834;A0A075B6Q0	P62834;A0A075B6Q0	Ras-related protein Rap-1A	RAP1A
5.439	5.19748	P41223;P41223-2;C9JCD9;F8WCN7	P41223;P41223-2;C9JCD9	Protein BUD31 homolog	BUD31
5.439	4.89637	Q86XP3;Q86XP3-2;A0A0A0MSJ0;J3QRI2;J3KTK9;J3KRE3	Q86XP3;Q86XP3-2;A0A0A0MSJ0	ATP-dependent RNA helicase DDX42	DDX42
5.439	4.79666	O00267;O00267-2;M0QYL9;M0R2M5	O00267;O00267-2	Transcription elongation factor SPT5	SUPT5H
5.438	4.47538	Q13895;H7BY94;F8WBL2	Q13895	Bystin	BYSL
5.437	NaN	Q9Y244;A0A1W2PS02	Q9Y244;A0A1W2PS02	Proteasome maturation protein	POMP
5.437	4.57828	Q96J01;Q96J01-2;D6REC9;D6RGZ2;H0Y9T1;H7C0C5	Q96J01;Q96J01-2	THO complex subunit 3	THOC3
5.436	4.93478	O75306;O75306-2	O75306;O75306-2	NADH dehydrogenase [ubiquinone] iron-sulfur protein 2, mitochondrial	NDUFS2
5.436	4.80703	Q8NFH4;F8VTY2;H0YHK8	Q8NFH4;F8VTY2	Nucleoporin Nup37	NUP37
5.436	5.19996	P31150;G5E9U5	P31150	Rab GDP dissociation inhibitor alpha	GDI1
5.436	5.08992	Q15836	Q15836	Vesicle-associated membrane protein 3	VAMP3
5.435	5.5349	Q13404;I3L0A0;Q13404-7;Q13404-1;Q13404-2;Q13404-8;G3V2F7;A0A0A0MSL3;Q13404-6;E5RIF1;D6RG00	Q13404;I3L0A0;Q13404-7;Q13404-1;Q13404-2;Q13404-8;G3V2F7;A0A0A0MSL3;Q13404-6	Ubiquitin-conjugating enzyme E2 variant 1	UBE2V1;TMEM189-UBE2V1
5.435	2.06968	Q9BPX3;D6RA93;H0Y9Z8	Q9BPX3	Condensin complex subunit 3	NCAPG
5.434	4.26156	P08397-2;P08397;F5H345;P08397-4;P08397-3;F5GY90;A0A1W2PNU5;F5H226;F5H0P4;F5H4W5;F5H4X2	P08397-2;P08397;F5H345;P08397-4;P08397-3;F5GY90;A0A1W2PNU5;F5H226	Porphobilinogen deaminase	HMBS
5.434	5.28558	P42768;C9J3B7	P42768	Wiskott-Aldrich syndrome protein	WAS
5.433	4.82381	Q6DKI1;R4GMU7;Q6DKI1-2	Q6DKI1;R4GMU7;Q6DKI1-2	60S ribosomal protein L7-like 1	RPL7L1
5.433	5.11943	Q92556;Q92556-3;H7C0S6;Q92556-2;H7C3P3;C9JIW2;C9IZR8;H7C0N5;C9JB20;C9J5X3	Q92556	Engulfment and cell motility protein 1	ELMO1
5.433	4.63318	Q562R1	Q562R1	Beta-actin-like protein 2	ACTBL2
5.431	4.46257	Q9GZN8;Q9GZN8-2;H7BYU9	Q9GZN8;Q9GZN8-2;H7BYU9	UPF0687 protein C20orf27	C20orf27
5.431	5.20494	O94903;E5RG77;E5RFX7;H0YBG2;E5RFZ4	O94903;E5RG77;E5RFX7	Proline synthase co-transcribed bacterial homolog protein	PROSC
5.43	4.81606	Q8IX12-2;Q8IX12;A0A0C4DGG8;F5H2E6;F5H1H2;F5H3E1;H0YFJ7;F5H7M9	Q8IX12-2;Q8IX12;A0A0C4DGG8;F5H2E6;F5H1H2	Cell division cycle and apoptosis regulator protein 1	CCAR1
5.429	2.64594	P53985;Q5T8R5;Q5T8R3;P53985-2;Q5T8R4	P53985;Q5T8R5;Q5T8R3;P53985-2	Monocarboxylate transporter 1	SLC16A1
5.429	5.18838	O60256;O60256-3;O60256-2;E7EPA1;O60256-4;C9K0K7;C9JJS3;C9JDU5;I3L0S1;C9JDH0;E7EW35;I3L164;I3L331;I3L1T1;I3L3B8;I3L2J4;I3L4G9;I3L275	O60256;O60256-3;O60256-2;E7EPA1;O60256-4;C9K0K7;C9JJS3;C9JDU5;I3L0S1	Phosphoribosyl pyrophosphate synthase-associated protein 2	PRPSAP2
5.427	4.51822	P60510;H3BTA2;H3BV22;I3L4X0;H3BPN5;H3BVE3	P60510;H3BTA2;H3BV22	Serine/threonine-protein phosphatase 4 catalytic subunit;Serine/threonine-protein phosphatase	PPP4C
5.427	5.54201	O60832;O60832-2;C9IYT0;H7C0M1;H7C2Q9;H7C2Q2;H7BZF2	O60832;O60832-2;C9IYT0	H/ACA ribonucleoprotein complex subunit 4	DKC1
5.426	3.93553	Q969Z0;Q969Z0-2;C9J7P5;C9IZN7;H7C4R5;C9J5A2;C9J347;C9J618	Q969Z0;Q969Z0-2;C9J7P5;C9IZN7	Protein TBRG4	TBRG4
5.426	2.88127	Q5TCJ5;Q9H3S1;Q9H3S1-2;Q5TCI6;Q5TCI4;A0A0J9YVY6;Q5TCJ7	Q5TCJ5;Q9H3S1;Q9H3S1-2;Q5TCI6	Semaphorin-4A	SEMA4A
5.425	4.36774	O15126;O15126-2;A0A087WXB0;A0A087WU14;A0A087WZA6;A0A087WTX8	O15126;O15126-2;A0A087WXB0	Secretory carrier-associated membrane protein 1	SCAMP1
5.424	4.87906	P43897;P43897-2;C9JT21;C9JG32;F8VPA7;F8VS27;P43897-4;P43897-3;F8WCK2	P43897;P43897-2;C9JT21	Elongation factor Ts, mitochondrial;Elongation factor Ts	TSFM
5.424	1.84812	P08473;C9JR96;C9J9X7;C9IYX7;C9JDZ3;A0A087WWM7;Q3KQS6	P08473	Neprilysin	MME
5.424	4.47086	Q14008;Q14008-2;Q14008-3;H0YDX5;E9PQH5;H0YEK7;H0YCF6	Q14008;Q14008-2;Q14008-3	Cytoskeleton-associated protein 5	CKAP5
5.424	4.5605	Q5TFE4;Q5TFE4-2;Q5QPD0;H0YDA5	Q5TFE4;Q5TFE4-2	5-nucleotidase domain-containing protein 1	NT5DC1
5.423	4.49622	Q58FF6	Q58FF6	Putative heat shock protein HSP 90-beta 4	HSP90AB4P
5.423	4.74286	Q9UBV8	Q9UBV8	Peflin	PEF1
5.423	4.28938	O95816;O95816-2	O95816;O95816-2	BAG family molecular chaperone regulator 2	BAG2
5.422	NaN	Q02535	Q02535	DNA-binding protein inhibitor ID-3	ID3
5.42	4.42719	A0A140TA86;Q5XKP0;K7EIR2;A0A140TA84	A0A140TA86;Q5XKP0	Protein QIL1	QIL1
5.42	4.49337	Q9BVJ6;Q9BVJ6-3;Q9BVJ6-2;Q5TAP6;X6RJY0	Q9BVJ6;Q9BVJ6-3;Q9BVJ6-2	U3 small nucleolar RNA-associated protein 14 homolog A	UTP14A
5.42	4.67724	Q9Y314;A0A075B6F9;M0R3B2;M0R1K2;A0A075B797;M0QX85;M0R1T7	Q9Y314;A0A075B6F9;M0R3B2	Nitric oxide synthase-interacting protein	NOSIP
5.42	4.37762	Q9BXY0;H0YBV6	Q9BXY0;H0YBV6	Protein MAK16 homolog	MAK16
5.42	5.25007	E7ETB3;Q9ULA0;E7EMB6;C9JBE1;F8WAN0;C9J1E2	E7ETB3;Q9ULA0;E7EMB6;C9JBE1	Aspartyl aminopeptidase	DNPEP
5.419	4.34012	Q969X6;H3BSH7;Q969X6-3;Q969X6-2;A0A0J9YWM9;A0A0J9YWK2;A0A0J9YXV4;H3BPD7;I3L4T9;J3KSI1;H3BRM8;J3KTR0;J3KSE6;A0A0J9YX18	Q969X6;H3BSH7;Q969X6-3;Q969X6-2;A0A0J9YWM9;A0A0J9YWK2;A0A0J9YXV4	Cirhin	CIRH1A
5.419	4.69047	Q9UJY4;H3BMM6;H3BPI3;I3L2C4;H3BMN6;I3L263	Q9UJY4	ADP-ribosylation factor-binding protein GGA2	GGA2
5.419	4.74812	Q9Y512	Q9Y512	Sorting and assembly machinery component 50 homolog	SAMM50
5.419	4.43259	I3L0E3;Q9Y2R5;E9PE17;F8WEN0;C9JUE3;C9J3R7;I3L137;K7ENX6;E5RGH0;E5RGC2;M0R0I7;M0QYU5;M0R079;M0R2R1;M0R0C2;F8WBQ5;M0QYA4;E9PPF8;E9PIN4;M0R1V2;E9PLW9;M0QYM6;J3KQN0;E9PN20;V9GYJ2;P17039-3;F6W2C3;M0QYV6;K7ENW2;A0A0A0MRD3;M0R2P3;K7ERS7;K7EL03;A0A0B4J2B2;J3KRF9;K7EM14;C9J5H1;F8WDJ7;J3KSW0;C9J487;C9JG37;K7EQQ2;J3QKY7;M0QXQ0;A0A1W2PQE6;B4E159;E5RH89;E5RHT5;A8MTT8;A0A0A0MRV5;M0R297;E9PSE6;Q1T7F6;K7ES26;D6R…	I3L0E3;Q9Y2R5;E9PE17	28S ribosomal protein S17, mitochondrial	hCG_1984214;MRPS17
5.418	5.19143	Q9UIJ7;Q9UIJ7-3;Q9UIJ7-2	Q9UIJ7;Q9UIJ7-3;Q9UIJ7-2	GTP:AMP phosphotransferase AK3, mitochondrial	AK3
5.418	4.39457	P50897;E9PMG2;E9PIA8;P50897-2;Q5T0S4;E9PP28;E9PK48;E9PSE5	P50897;E9PMG2;E9PIA8;P50897-2;Q5T0S4	Palmitoyl-protein thioesterase 1	PPT1
5.418	3.68684	Q9Y605;A0A087WTY9;Q96HT8	Q9Y605;A0A087WTY9	MORF4 family-associated protein 1	MRFAP1
5.418	4.46093	M0R0N4;M0QYZ2;P53680;X6R390;P53680-2;M0QZ21;M0R1S0	M0R0N4;M0QYZ2;P53680;X6R390;P53680-2;M0QZ21	AP-2 complex subunit sigma	AP2S1
5.417	3.80549	F6U1T9;D3YTA9;P63098;H7BYZ3;A0A1B0GUC7;Q96LZ3	F6U1T9;D3YTA9;P63098;H7BYZ3	Calcineurin subunit B type 1	PPP3R1
5.417	3.35557	O75794;X6RA30;X6RF82;X6RKY7;H7BZW7	O75794;X6RA30;X6RF82	Cell division cycle protein 123 homolog	CDC123
5.416	4.38219	Q8WXA9-2;Q8WXA9;A0A087WY03;E5RFV3;H0YC47	Q8WXA9-2;Q8WXA9	Splicing regulatory glutamine/lysine-rich protein 1	SREK1
5.416	4.85845	Q8ND56-2;Q8ND56;Q8ND56-3;I3L4Q1;A0A140TA66	Q8ND56-2;Q8ND56;Q8ND56-3	Protein LSM14 homolog A	LSM14A
5.415	4.84144	P49959;P49959-3	P49959;P49959-3	Double-strand break repair protein MRE11A	MRE11A
5.415	5.10245	P62487;E9PIU7;E9PKH3;H0YEE4	P62487	DNA-directed RNA polymerase II subunit RPB7	POLR2G
5.415	5.20058	Q9UKX7;Q9UKX7-2;B0QY21;X6RKQ2;B1AHA5	Q9UKX7;Q9UKX7-2	Nuclear pore complex protein Nup50	NUP50
5.414	4.17118	O00116;A0A1B0GWA2;B8ZZ81	O00116;A0A1B0GWA2	Alkyldihydroxyacetonephosphate synthase, peroxisomal	AGPS
5.414	4.54368	P40616-2;P40616;F8VYN9;B4DZG7;F8VP99;F8W1Z8;F8VP63	P40616-2;P40616;F8VYN9;B4DZG7	ADP-ribosylation factor-like protein 1	ARL1
5.414	4.23834	Q9NR50;Q9NR50-3;Q9NR50-2;H0Y580;A0A0D9SEN0	Q9NR50;Q9NR50-3;Q9NR50-2	Translation initiation factor eIF-2B subunit gamma	EIF2B3
5.414	5.00448	Q86W42;Q86W42-2;Q86W42-3	Q86W42;Q86W42-2;Q86W42-3	THO complex subunit 6 homolog	THOC6
5.413	5.15617	Q8WU79;A0A087WV97;Q8WU79-2;Q8WU79-3;X6RCC3	Q8WU79;A0A087WV97;Q8WU79-2;Q8WU79-3;X6RCC3	Stromal membrane-associated protein 2	SMAP2
5.413	4.73006	Q9UQ35;Q9UQ35-2;I3L4D8;I3L182;I3L1I8;Q9UQ35-3;A0A087X1W1;I3L0N7;I3L3Q8;I3L1C0;I3L4U6	Q9UQ35;Q9UQ35-2	Serine/arginine repetitive matrix protein 2	SRRM2
5.413	5.04835	Q9BY77;F6VRR5;Q9BY77-2;F8WCX5;Q8WUT1;Q6R954;F8WEE2	Q9BY77;F6VRR5;Q9BY77-2;F8WCX5	Polymerase delta-interacting protein 3	POLDIP3
5.412	4.15352	P60604;P60604-2;F8WCB9;F8WDB1	P60604;P60604-2	Ubiquitin-conjugating enzyme E2 G2	UBE2G2
5.412	4.35291	P40222	P40222	Alpha-taxilin	TXLNA
5.411	5.04061	Q15257;Q15257-2;A6PVN5;F6WIT2;Q15257-3;Q15257-4;Q5T949;Q5T948;A6PVN9;Q68CR8;A6PVN8;A6PVN6;A6PVN7;C9IZ76;B7ZBQ0;H0Y6E5;B7ZBP9;B7ZBP7;B4DDQ6;H0Y562	Q15257;Q15257-2;A6PVN5;F6WIT2;Q15257-3;Q15257-4;Q5T949;Q5T948;A6PVN9	Serine/threonine-protein phosphatase 2A activator	PPP2R4
5.41	4.90285	Q6GMV3	Q6GMV3	Putative peptidyl-tRNA hydrolase PTRHD1	PTRHD1
5.41	4.9035	C9JCC6;Q14919;Q14919-2;E9PQX9;E9PNC7;E9PMW2	C9JCC6;Q14919;Q14919-2;E9PQX9;E9PNC7	Dr1-associated corepressor	DRAP1
5.41	4.60287	G5E9W7;G5E9V5;P82650;H7C5F2;P82650-2;H7C5L9	G5E9W7;G5E9V5;P82650	28S ribosomal protein S22, mitochondrial	MRPS22
5.409	4.7358	Q9NPD3;E9PI41;E9PPI9	Q9NPD3;E9PI41	Exosome complex component RRP41	EXOSC4
5.409	4.71548	P52298;P52298-3;P52298-2;C9JQX9;B3KSB0;F8WE41	P52298;P52298-3;P52298-2;C9JQX9;B3KSB0	Nuclear cap-binding protein subunit 2	NCBP2
5.409	4.59762	P11172;P11172-3;P11172-2;E9PFD2;P11172-4;F2Z3P2;F2Z303;F8WDG4	P11172;P11172-3;P11172-2;E9PFD2;P11172-4	Uridine 5-monophosphate synthase;Orotate phosphoribosyltransferase;Orotidine 5-phosphate decarboxylase	UMPS
5.408	NaN	A0A182DWE9;A0A140T915;A0A140T9Y2;A0A140T9T6	A0A182DWE9;A0A140T915;A0A140T9Y2;A0A140T9T6
5.408	4.8206	Q96HE7;G3V3E6;G3V5B3;G3V2H0;G3V503	Q96HE7	ERO1-like protein alpha	ERO1L
5.407	4.38933	Q96RS6;Q96RS6-3;E5RGX7	Q96RS6;Q96RS6-3	NudC domain-containing protein 1	NUDCD1
5.407	4.96598	P10155;P10155-3;P10155-5;P10155-4;P10155-2;H0Y9N5;G5E9R9;D6RE09;D6RDN1	P10155;P10155-3;P10155-5;P10155-4	60 kDa SS-A/Ro ribonucleoprotein	TROVE2
5.407	3.479	Q9H6Z4-3;Q9H6Z4;K7EN31	Q9H6Z4-3;Q9H6Z4	Ran-binding protein 3	RANBP3
5.406	5.09753	A6NEM2;P51610-4;P51610-3	A6NEM2;P51610-4	Host cell factor 1;HCF N-terminal chain 1;HCF N-terminal chain 2;HCF N-terminal chain 3;HCF N-terminal chain 4;HCF N-terminal chain 5;HCF N-terminal chain 6;HCF C-terminal chain 1;HCF C-terminal chain 2;HCF C-terminal chain 3;HCF C-terminal chain 4;HCF C-terminal chain 5;HCF C-terminal chain 6	HCFC1
5.405	4.97198	Q9ULZ2	Q9ULZ2	Signal-transducing adaptor protein 1	STAP1
5.404	4.78912	O43681;A0A087WXS7;K7ERW9	O43681;A0A087WXS7	ATPase ASNA1	ASNA1
5.404	NaN	O95864;O95864-3;O95864-4;O95864-2;E5RGZ5;E5RGD8	O95864;O95864-3;O95864-4;O95864-2	Fatty acid desaturase 2	FADS2
5.403	3.89918	P25325-2	P25325-2	3-mercaptopyruvate sulfurtransferase	MPST
5.403	4.66573	Q15388	Q15388	Mitochondrial import receptor subunit TOM20 homolog	TOMM20
5.403	4.3139	Q15796-2;Q15796;B7Z5N5;K7EJX0;K7ERC7;K7ESI8;K7EL92	Q15796-2;Q15796;B7Z5N5;K7EJX0	Mothers against decapentaplegic homolog 2;Mothers against decapentaplegic homolog	SMAD2
5.402	6.21923	Q5SSJ5;Q5SSJ5-2;Q5SSJ5-3;B0QZK4;X6RGJ2;Q5SWC8;B0QZK9;B0QZK8	Q5SSJ5;Q5SSJ5-2;Q5SSJ5-3;B0QZK4;X6RGJ2	Heterochromatin protein 1-binding protein 3	HP1BP3
5.401	4.60801	A0A087WWM4;Q9P2T1;F8WAN9;Q9P2T1-3;H0YMB3;H0YNJ6;Q9P2T1-2;H0YLV5;H0YLB8;H0YK13;H0YNS9;H0YNH0;H0YK71;H0YMV5;H0YN22;H0YMR9;A0A0B4J281;H0YMG3;H0YMW6;H0YKK3;H0YN74;P36959;H0YL68;H0YKE1	A0A087WWM4;Q9P2T1;F8WAN9;Q9P2T1-3;H0YMB3;H0YNJ6;Q9P2T1-2;H0YLV5;H0YLB8	GMP reductase;GMP reductase 2	GMPR2
5.401	4.5868	P18583-5;P18583-7;P18583;P18583-9;P18583-10;P18583-4;P18583-2;H7C1M2;J3QSZ5;H7C2G8;H7C1S4;H7C257	P18583-5;P18583-7;P18583;P18583-9;P18583-10;P18583-4;P18583-2;H7C1M2	Protein SON	SON
5.401	4.89447	Q9HCC0;Q9HCC0-2;D6RDF7;D6RD67;D6R9R1;A0A0G2JM88	Q9HCC0;Q9HCC0-2;D6RDF7	Methylcrotonoyl-CoA carboxylase beta chain, mitochondrial	MCCC2
5.4	4.9569	Q9Y2B0;H0YI18	Q9Y2B0	Protein canopy homolog 2	CNPY2
5.4	4.32026	Q4VC05-2	Q4VC05-2	B-cell CLL/lymphoma 7 protein family member A	BCL7A
5.4	4.24486	Q9NZ63	Q9NZ63	Uncharacterized protein C9orf78	C9orf78
5.4	3.9902	P20839;P20839-3;P20839-7;P20839-5;P20839-6;C9J381;P20839-2;P20839-4;C9K0R9;C9J029;H7C5T1;H7C511	P20839;P20839-3;P20839-7;P20839-5;P20839-6;C9J381;P20839-2;P20839-4	Inosine-5-monophosphate dehydrogenase 1;Inosine-5-monophosphate dehydrogenase	IMPDH1
5.399	4.25687	Q9HB07;F8VQQ3;F8VR84;H3BPH3	Q9HB07;F8VQQ3;F8VR84	UPF0160 protein MYG1, mitochondrial	C12orf10
5.399	4.24684	Q13619;Q13619-2;A0A0A0MR50;A0A087WWN2	Q13619;Q13619-2;A0A0A0MR50	Cullin-4A	CUL4A
5.399	5.20314	Q96FJ2	Q96FJ2	Dynein light chain 2, cytoplasmic	DYNLL2
5.398	4.96584	Q9UNS2;Q9UNS2-2;H7C3P9;C9JLV5;J3QKR0;J3KTQ1;K7ES36;J3QL22;J3QS85;K7ELN6	Q9UNS2;Q9UNS2-2;H7C3P9	COP9 signalosome complex subunit 3	COPS3
5.398	3.99679	Q8IYS1	Q8IYS1	Peptidase M20 domain-containing protein 2	PM20D2
5.398	4.94043	Q9NP72;Q9NP72-2;A0A087X163;H0Y6T8;Q5W0J0;Q9NP72-3	Q9NP72;Q9NP72-2;A0A087X163;H0Y6T8;Q5W0J0	Ras-related protein Rab-18	RAB18
5.398	5.28874	O15173;O15173-2;U3KQM0;D3DNX8	O15173;O15173-2;U3KQM0	Membrane-associated progesterone receptor component 2	PGRMC2
5.397	5.15441	O75436;O75436-2;S4R3Q6;S4R2Y3	O75436;O75436-2;S4R3Q6	Vacuolar protein sorting-associated protein 26A	VPS26A
5.397	5.10547	F8VXC8;Q8TAQ2-2;Q8TAQ2-3;F8VZW6	F8VXC8;Q8TAQ2-2;Q8TAQ2-3	SWI/SNF complex subunit SMARCC2	SMARCC2
5.396	4.13994	Q99543;Q99543-2;H7C3L7;F2Z3N9;C9IZ83;F2Z3H0	Q99543;Q99543-2	DnaJ homolog subfamily C member 2;DnaJ homolog subfamily C member 2, N-terminally processed	DNAJC2
5.396	4.83166	Q9Y6W5;Q9Y6W5-2;Q9UPY6-2;Q9UPY6	Q9Y6W5;Q9Y6W5-2	Wiskott-Aldrich syndrome protein family member 2	WASF2
5.396	4.58277	Q96DA6;Q96DA6-2;F2Z3A7;G5E9V2	Q96DA6;Q96DA6-2	Mitochondrial import inner membrane translocase subunit TIM14	DNAJC19
5.396	4.34694	Q9NRG9;Q9NRG9-2;F8VZ44;H3BU82;F8VUB6	Q9NRG9;Q9NRG9-2;F8VZ44;H3BU82	Aladin	AAAS
5.396	NaN	Q99661;Q99661-2;Q5JR89;H0Y5Z9	Q99661;Q99661-2	Kinesin-like protein KIF2C	KIF2C
5.395	4.94913	Q96I24;Q96I24-2	Q96I24	Far upstream element-binding protein 3	FUBP3
5.395	4.22175	Q5JRG1;H7BYF2;Q9BVL2-2;Q9BVL2-3;Q9BVL2	Q5JRG1;H7BYF2;Q9BVL2-2;Q9BVL2-3;Q9BVL2	Nucleoporin p58/p45	NUPL1
5.394	4.86477	O43617;A0A087WWM0;O43617-2;A0A087WYS5;A6NKE1	O43617;A0A087WWM0;O43617-2;A0A087WYS5;A6NKE1	Trafficking protein particle complex subunit 3	TRAPPC3
5.394	4.57139	B5MCF9;O00541;O00541-2;B3KXD6;H7C267	B5MCF9;O00541;O00541-2;B3KXD6	Pescadillo homolog	PES1
5.394	4.46063	Q8TED0;Q8TED0-3;D6RF65	Q8TED0;Q8TED0-3	U3 small nucleolar RNA-associated protein 15 homolog	UTP15
5.393	5.28697	P22694-2;A0A0A0MS54;P22694-4;P22694-3;P22694;P22694-5;P22694-7;P22694-6;P22694-9;A0A087WVC4;P22694-10;B1APG2;B1APF8;B1APF9;B1APG3;P22694-8;B1APG1;B1APG0;B1APF7	P22694-2;A0A0A0MS54;P22694-4;P22694-3;P22694;P22694-5;P22694-7;P22694-6;P22694-9;A0A087WVC4;P22694-10;B1APG2;B1APF8;B1APF9;B1APG3;P22694-8;B1APG1;B1APG0	cAMP-dependent protein kinase catalytic subunit beta	PRKACB
5.393	4.9217	O43488;H3BLU7;H7C5H7;Q8NHP1;O95154	O43488;H3BLU7	Aflatoxin B1 aldehyde reductase member 2	AKR7A2
5.393	4.56033	Q9HCN8	Q9HCN8	Stromal cell-derived factor 2-like protein 1	SDF2L1
5.392	4.25959	P61073;P61073-2	P61073;P61073-2	C-X-C chemokine receptor type 4	CXCR4
5.391	5.14029	Q07960;H0YE29;E9PNR6	Q07960;H0YE29	Rho GTPase-activating protein 1	ARHGAP1
5.391	5.04991	P55265;P55265-4;P55265-5	P55265;P55265-4;P55265-5	Double-stranded RNA-specific adenosine deaminase	ADAR
5.391	4.34482	A0A024RCR6;A0A0G2JK23;P46379-2;P46379;P46379-3;A0A0G2JL47;P46379-5;P46379-4;F6S6P2;X6REW1;A0A0G2JJM1;F6UR09;A0A0G2JJR8;F6VEM6;F6X9W3;F6U341;F6U1F2;F6XTU0;A0A1B0GX79;F6WML8;F6TC96;H0Y710;H0Y4L1	A0A024RCR6;A0A0G2JK23;P46379-2;P46379;P46379-3;A0A0G2JL47;P46379-5;P46379-4	Large proline-rich protein BAG6	BAT3;BAG6
5.389	4.52143	O94888;C9JAT7;C9JD50;F8WB69;H7BYF4	O94888;C9JAT7	UBX domain-containing protein 7	UBXN7
5.389	4.9652	Q9H845;H0Y8Z9;D6RCD8	Q9H845;H0Y8Z9	Acyl-CoA dehydrogenase family member 9, mitochondrial	ACAD9
5.388	5.61041	Q9UFW8;C9JUJ0	Q9UFW8;C9JUJ0	CGG triplet repeat-binding protein 1	CGGBP1
5.388	4.73762	Q96A33;Q96A33-2;A0A087WYW6;J3QR89	Q96A33;Q96A33-2;A0A087WYW6	Coiled-coil domain-containing protein 47	CCDC47
5.388	4.71833	O75694;O75694-2;E9PF10;D6RA13	O75694;O75694-2;E9PF10	Nuclear pore complex protein Nup155	NUP155
5.388	4.7095	P42566;B1AUU8;P42566-2;S4R3U1	P42566;B1AUU8;P42566-2	Epidermal growth factor receptor substrate 15	EPS15
5.388	5.07175	P52435;A0A0B4J2F8;F6S314;E2QRJ6;A6NFM0;Q9H1A7;Q9GZM3;D6RAG0;E7EP90;A0A0B4J1Z8;E7EWC6;F8WF84;Q9GZM3-2	P52435;A0A0B4J2F8;F6S314;E2QRJ6;A6NFM0;Q9H1A7;Q9GZM3;D6RAG0;E7EP90;A0A0B4J1Z8;E7EWC6	DNA-directed RNA polymerase II subunit RPB11-a;DNA-directed RNA polymerase II subunit RPB11-b2;DNA-directed RNA polymerase II subunit RPB11-b1	POLR2J;POLR2J3;POLR2J2
5.387	3.48881	P30154;P30154-2;P30154-4;P30154-3;P30154-5;H0YDG7;E9PPI5;E9PHZ6;E9PNM7	P30154;P30154-2;P30154-4;P30154-3;P30154-5	Serine/threonine-protein phosphatase 2A 65 kDa regulatory subunit A beta isoform	PPP2R1B
5.387	5.08037	P50402;Q5HY57;F8WEQ1	P50402	Emerin	EMD
5.387	4.5666	Q9Y3C1;D6RIC3;A0A0C4DGU5;A0A087X2G6;Q9Y3C1-3;Q9Y3C1-2;D6RC60;A0A087WU10	Q9Y3C1;D6RIC3;A0A0C4DGU5;A0A087X2G6;Q9Y3C1-3;Q9Y3C1-2	Nucleolar protein 16	NOP16
5.387	4.64736	Q9Y3L5;A0A087X2C3	Q9Y3L5;A0A087X2C3	Ras-related protein Rap-2c	RAP2C
5.387	4.8736	O95139;A0A087WZX2;O95139-2	O95139;A0A087WZX2;O95139-2	NADH dehydrogenase [ubiquinone] 1 beta subcomplex subunit 6	NDUFB6
5.386	5.08823	Q9P2R7-2;Q9P2R7;Q5T9Q5;A0A0U1RQF8;Q5T9Q8;A0A0U1RQL1;A0A0U1RRI1;A0A0U1RQU7	Q9P2R7-2;Q9P2R7;Q5T9Q5	Succinyl-CoA ligase [ADP-forming] subunit beta, mitochondrial	SUCLA2
5.386	6.61862	P16403	P16403	Histone H1.2	HIST1H1C
5.386	4.87487	B6VEX4;A0A0A0MRT6;Q8IZP0-10;Q8IZP0-8;Q8IZP0-7;Q8IZP0-2;Q8IZP0-4;Q8IZP0-3;Q8IZP0-5;Q8IZP0-6;Q8IZP0-9;Q8IZP0;Q8IZP0-12;Q8IZP0-11	B6VEX4;A0A0A0MRT6;Q8IZP0-10;Q8IZP0-8;Q8IZP0-7;Q8IZP0-2;Q8IZP0-4;Q8IZP0-3;Q8IZP0-5;Q8IZP0-6;Q8IZP0-9;Q8IZP0;Q8IZP0-12;Q8IZP0-11	Abl interactor 1	ABI1
5.386	4.73618	Q92974-2;Q92974;V9GYM8;Q92974-3;Q5VY93;V9GZ14;V9GYG5;V9GYF5;V9GZ58	Q92974-2;Q92974;V9GYM8;Q92974-3	Rho guanine nucleotide exchange factor 2	ARHGEF2
5.384	4.82057	Q15007;A0A087X1R4;Q15007-2	Q15007;A0A087X1R4;Q15007-2	Pre-mRNA-splicing regulator WTAP	WTAP
5.384	4.93115	O95202;O95202-3;O95202-2	O95202	LETM1 and EF-hand domain-containing protein 1, mitochondrial	LETM1
5.384	4.0937	Q9BV86;S4R338;Q9BV86-2;S4R3J7;S4R344	Q9BV86;S4R338	N-terminal Xaa-Pro-Lys N-methyltransferase 1;N-terminal Xaa-Pro-Lys N-methyltransferase 1, N-terminally processed	NTMT1
5.384	3.90162	Q96CG3	Q96CG3	TRAF-interacting protein with FHA domain-containing protein A	TIFA
5.384	4.9075	Q9Y5K6	Q9Y5K6	CD2-associated protein	CD2AP
5.383	5.81696	O14949	O14949	Cytochrome b-c1 complex subunit 8	UQCRQ
5.382	5.21494	S4R3H4;E7EQT4;Q9UKV3;Q9UKV3-3;Q9UKV3-2	S4R3H4;E7EQT4;Q9UKV3;Q9UKV3-3;Q9UKV3-2	Apoptotic chromatin condensation inducer in the nucleus	ACIN1
5.382	3.92023	Q13501;Q13501-2;E7EMC7;E9PFW8;C9JRJ8;E3W990;D6RBF1;C9J6J8	Q13501;Q13501-2;E7EMC7	Sequestosome-1	SQSTM1
5.381	5.92492	Q96KP4;Q96KP4-2;J3QKT2;J3KSV5;A0A087WYZ1;J3QKQ0;J3QRD0;J3QR27;J3QLU1;J3QRA8;J3QQN6;A0A087WVS2;J3QL02;J3QRH4;J3KSS4;J3KRD5;J3QRP4;J3KRJ8	Q96KP4;Q96KP4-2;J3QKT2	Cytosolic non-specific dipeptidase	CNDP2
5.381	5.2578	I3L0N3;P46459;P46459-2;I3L2G1;I3L0L3;K7EQD6;I3L338;I3L4Q9	I3L0N3;P46459;P46459-2	Vesicle-fusing ATPase	NSF
5.381	4.94223	Q53GS9;B9A018;Q53GS9-3;A0A087X1B2;F8WC91;C9JIU2;A0A087WW31	Q53GS9;B9A018;Q53GS9-3;A0A087X1B2	U4/U6.U5 tri-snRNP-associated protein 2	USP39
5.38	4.66435	Q5T8U5;O15260-2;O15260;O15260-3;B7Z1G8	Q5T8U5;O15260-2;O15260;O15260-3;B7Z1G8	Surfeit locus protein 4	SURF4
5.38	4.54903	P07311;G3V2U7;G3V3F8;G3V597;P07311-2	P07311;G3V2U7	Acylphosphatase-1;Acylphosphatase	ACYP1
5.379	4.22262	Q9Y385	Q9Y385	Ubiquitin-conjugating enzyme E2 J1	UBE2J1
5.378	NaN	Q15645;H0YAL2;Q15645-2	Q15645	Pachytene checkpoint protein 2 homolog	TRIP13
5.378	5.25538	P29218;P29218-3;H0YBL1;E5RIP7;E5RG13;P29218-2;E5RHE9;E5RI82;E5RGY4;E5RG94;E5RIF4	P29218;P29218-3;H0YBL1;E5RIP7;E5RG13;P29218-2;E5RHE9;E5RI82;E5RGY4;E5RG94	Inositol monophosphatase 1	IMPA1
5.377	4.91515	A0A087X0R6;Q9UMY4-2;Q9UMY4;Q9UMY4-3	A0A087X0R6;Q9UMY4-2;Q9UMY4;Q9UMY4-3	Sorting nexin-12	SNX12
5.377	4.45395	E9PFR3;Q14738;Q14738-2;Q14738-3;H0Y8C4;H7C5Q9	E9PFR3;Q14738;Q14738-2;Q14738-3;H0Y8C4	Serine/threonine-protein phosphatase 2A 56 kDa regulatory subunit delta isoform	PPP2R5D
5.377	4.95893	C9J6P4;Q7Z2W4-4;H7C5K1;Q7Z2W4-5	C9J6P4		ZC3HAV1
5.377	4.51199	Q8WU90;Q8WU90-2;F8WB26;H7C466	Q8WU90	Zinc finger CCCH domain-containing protein 15	ZC3H15
5.377	4.88147	O43660;O43660-2;D6RA26;H0YA24;B7Z982;H0YAA2	O43660;O43660-2	Pleiotropic regulator 1	PLRG1
5.377	4.49121	Q16204	Q16204	Coiled-coil domain-containing protein 6	CCDC6
5.376	4.4654	C9JJ19;P82930	C9JJ19;P82930	28S ribosomal protein S34, mitochondrial	MRPS34
5.375	4.45297	Q6P2E9;Q6P2E9-2;I3L2F4;I3L0V0;I3L3M2	Q6P2E9;Q6P2E9-2	Enhancer of mRNA-decapping protein 4	EDC4
5.374	4.27745	P35269;M0QXD6;M0R0R9;M0R0Z3	P35269;M0QXD6;M0R0R9	General transcription factor IIF subunit 1	GTF2F1
5.374	4.33917	Q9H9A6	Q9H9A6	Leucine-rich repeat-containing protein 40	LRRC40
5.373	5.62088	Q9NVJ2;Q9NVJ2-2	Q9NVJ2	ADP-ribosylation factor-like protein 8B	ARL8B
5.372	4.72803	Q8NAV1;Q8NAV1-2	Q8NAV1	Pre-mRNA-splicing factor 38A	PRPF38A
5.371	4.69198	P82663;E7EPW2;P82663-2;P82663-3	P82663;E7EPW2;P82663-2	28S ribosomal protein S25, mitochondrial	MRPS25
5.371	4.47974	Q7Z7H5-3;Q7Z7H5;Q7Z7H5-2;F8W7F7	Q7Z7H5-3;Q7Z7H5;Q7Z7H5-2	Transmembrane emp24 domain-containing protein 4	TMED4
5.371	4.32186	Q13610;B4DJV5;Q13610-2;F8VZ56	Q13610;B4DJV5	Periodic tryptophan protein 1 homolog	PWP1
5.37	4.70047	Q9Y3T9	Q9Y3T9	Nucleolar complex protein 2 homolog	NOC2L
5.37	5.75527	P49189;P49189-2	P49189;P49189-2	4-trimethylaminobutyraldehyde dehydrogenase	ALDH9A1
5.37	3.93664	Q9BY50;B4DI03;K7EJQ7;A0A0A0MR04	Q9BY50;B4DI03;K7EJQ7	Signal peptidase complex catalytic subunit SEC11C;Signal peptidase complex catalytic subunit SEC11	SEC11C;SEC11L3
5.37	4.99059	Q9UIQ6	Q9UIQ6	Leucyl-cystinyl aminopeptidase;Leucyl-cystinyl aminopeptidase, pregnancy serum form	LNPEP
5.37	4.29325	Q9NUJ1;Q9NUJ1-2;Q9NUJ1-3	Q9NUJ1;Q9NUJ1-2	Mycophenolic acid acyl-glucuronide esterase, mitochondrial	ABHD10
5.37	4.62173	Q9NZ08;Q9NZ08-2;H0Y9X5;D6RAL9	Q9NZ08;Q9NZ08-2	Endoplasmic reticulum aminopeptidase 1	ERAP1
5.369	4.64243	P13984	P13984	General transcription factor IIF subunit 2	GTF2F2
5.368	5.52622	P60468;S4R3B5	P60468	Protein transport protein Sec61 subunit beta	SEC61B
5.368	5.09638	O75438;O75438-2	O75438;O75438-2	NADH dehydrogenase [ubiquinone] 1 beta subcomplex subunit 1	NDUFB1
5.367	5.01752	Q9NSE4	Q9NSE4	Isoleucine--tRNA ligase, mitochondrial	IARS2
5.367	4.52426	P52788;P52788-2;H7C2R7	P52788;P52788-2;H7C2R7	Spermine synthase	SMS
5.367	4.64151	P21283;E7EV59	P21283;E7EV59	V-type proton ATPase subunit C 1	ATP6V1C1
5.367	4.78828	Q9H0S4;Q9H0S4-2;F5H1N9	Q9H0S4;Q9H0S4-2	Probable ATP-dependent RNA helicase DDX47	DDX47
5.366	4.75968	Q9H0L4	Q9H0L4	Cleavage stimulation factor subunit 2 tau variant	CSTF2T
5.366	4.9256	Q96C01;E7EQY1;C9J2Y4;C9JF51	Q96C01;E7EQY1	Protein FAM136A	FAM136A
5.365	4.90302	Q02818;H7BZI1;C9JKZ2;C9JBD3;C9J3C1	Q02818;H7BZI1	Nucleobindin-1	NUCB1
5.364	2.95753	V9HW75;A0A087WSV8;P80303;P80303-2;Q2L696;E9PKG6;H0YEG8;E9PLR0;E9PLE9;H0YD18;E9PM22;E9PJP3	V9HW75;A0A087WSV8;P80303;P80303-2;Q2L696;E9PKG6	Nucleobindin-2;Nesfatin-1	HEL-S-109;NUCB2;Nucb2
5.363	3.89055	Q9Y6A5;E7EMT0;C9JA91;C9JWI7;Q8IX09;H0Y8F2;F8WC55	Q9Y6A5	Transforming acidic coiled-coil-containing protein 3	TACC3
5.363	4.72023	Q13564-2;Q13564;Q13564-4;Q13564-3;H3BMR3;J3KTE3;J3QRA5;J3KRK3;J3QLH4;H3BSS8;H3BQW6	Q13564-2;Q13564;Q13564-4;Q13564-3	NEDD8-activating enzyme E1 regulatory subunit	NAE1
5.363	4.19342	Q9NQ88;A0A0U1RQD1	Q9NQ88;A0A0U1RQD1	Fructose-2,6-bisphosphatase TIGAR	TIGAR
5.362	4.32149	Q9NT62;Q9NT62-2;F8WDI0;C9JNW8	Q9NT62;Q9NT62-2	Ubiquitin-like-conjugating enzyme ATG3	ATG3
5.361	3.72946	Q8NCA5-2;Q8NCA5;E9PH82;C9J3G8	Q8NCA5-2;Q8NCA5;E9PH82	Protein FAM98A	FAM98A
5.361	4.7802	Q9P015;E5RIZ4;E5RHF4	Q9P015;E5RIZ4;E5RHF4	39S ribosomal protein L15, mitochondrial	MRPL15
5.361	4.69335	Q9NYJ1;Q9NYJ1-2	Q9NYJ1;Q9NYJ1-2	Cytochrome c oxidase assembly factor 4 homolog, mitochondrial	COA4
5.36	4.32758	P82673;H0YG82;P82673-2	P82673	28S ribosomal protein S35, mitochondrial	MRPS35
5.36	4.85667	Q9NYU2-2;Q9NYU2;H7BZG0;F8WCI2;F8WCE6	Q9NYU2-2;Q9NYU2	UDP-glucose:glycoprotein glucosyltransferase 1	UGGT1
5.36	4.73553	F8W8I6;P31483;P31483-3;E5RGV5;E5RG67;F8WE16	F8W8I6;P31483;P31483-3;E5RGV5;E5RG67	Nucleolysin TIA-1 isoform p40	TIA1
5.359	3.94579	Q9UHA3;H3BMQ2;H3BPF2	Q9UHA3	Probable ribosome biogenesis protein RLP24	RSL24D1
5.359	4.88384	Q56VL3;D6RD77;J3KPI9;Q56VL3-2	Q56VL3;D6RD77;J3KPI9;Q56VL3-2	OCIA domain-containing protein 2	OCIAD2
5.359	4.74165	A0A0A6YYA0;Q86XR7-2;Q9Y3B3-2;Q9Y3B3;G3V2Y2	A0A0A6YYA0;Q86XR7-2;Q9Y3B3-2;Q9Y3B3	Transmembrane emp24 domain-containing protein 7	TMED7-TICAM2;TMED7
5.359	5.2584	Q07812-5;Q07812-8;Q07812;Q07812-2;Q07812-7;K4JQN1;I6LPK7;Q07812-6;Q07812-4	Q07812-5;Q07812-8;Q07812;Q07812-2;Q07812-7	Apoptosis regulator BAX	BAX
5.359	4.94761	P11216;H0Y4Z6;P11217;P11217-2	P11216	Glycogen phosphorylase, brain form	PYGB
5.358	5.04725	Q9Y3B7;Q9Y3B7-2;Q9Y3B7-3;E9PQB6;H0YCD5	Q9Y3B7;Q9Y3B7-2;Q9Y3B7-3	39S ribosomal protein L11, mitochondrial	MRPL11
5.358	3.97302	A0A1W2PRV5;E7EQZ4;Q16637-3;Q16637;Q16637-4;Q16637-2;B4DP61;A0A0G2JRX5;A0A0G2JRY6;H0YBZ9;A0A0G2JQN8	A0A1W2PRV5;E7EQZ4;Q16637-3;Q16637;Q16637-4;Q16637-2;B4DP61	Survival motor neuron protein	SMN1;SMN2
5.358	4.25733	Q9H993;F5GZY1	Q9H993;F5GZY1	Protein-glutamate O-methyltransferase	ARMT1
5.358	4.64957	Q15061;C9IZK7;C9JEE7	Q15061	WD repeat-containing protein 43	WDR43
5.358	3.75097	Q13257;Q13257-2;D6RJE3	Q13257	Mitotic spindle assembly checkpoint protein MAD2A	MAD2L1
5.358	4.21488	Q9BU61;Q9BU61-2	Q9BU61;Q9BU61-2	NADH dehydrogenase [ubiquinone] 1 alpha subcomplex assembly factor 3	NDUFAF3
5.357	4.74912	Q9H3P7	Q9H3P7	Golgi resident protein GCP60	ACBD3
5.357	4.8759	O43172-2;O43172	O43172-2;O43172	U4/U6 small nuclear ribonucleoprotein Prp4	PRPF4
5.356	4.38671	Q8TEX9;Q8TEX9-2;H0YN14;H0YMR4;H0YN07;H0YLV0;H0YL92;H0YKG5;H0YK93	Q8TEX9;Q8TEX9-2;H0YN14	Importin-4	IPO4
5.355	4.3267	Q9BRG1;K7EKV4;K7ENE3;K7EP45	Q9BRG1;K7EKV4;K7ENE3	Vacuolar protein-sorting-associated protein 25	VPS25
5.354	5.33711	Q9UKT9;Q9UKT9-4;Q9UKT9-3;Q9UKT9-7;Q9UKT9-6;Q9UKT9-8;Q9UKT9-2;Q9UKT9-5;Q9UKT9-13;Q9UKT9-9;Q9UKT9-15;Q9UKT9-10;Q9UKT9-14;Q9UKT9-11;Q9UKT9-12;Q9UKT9-16;A0A0C4DGN9;A0A087WYH1;A0A087WV78	Q9UKT9;Q9UKT9-4;Q9UKT9-3;Q9UKT9-7;Q9UKT9-6;Q9UKT9-8;Q9UKT9-2;Q9UKT9-5;Q9UKT9-13;Q9UKT9-9;Q9UKT9-15;Q9UKT9-10;Q9UKT9-14;Q9UKT9-11	Zinc finger protein Aiolos	IKZF3
5.354	4.38322	K7ENI6;K7ERE1;Q8N2U0	K7ENI6;K7ERE1;Q8N2U0	Transmembrane protein 256	TMEM256
5.354	3.72057	Q15020;Q15020-4;F8VV04;Q15020-2;F8W667;H0YHU8;F8VZM2;F8VVK9;Q15020-3	Q15020;Q15020-4;F8VV04	Squamous cell carcinoma antigen recognized by T-cells 3	SART3
5.353	5.21101	P08754	P08754	Guanine nucleotide-binding protein G(k) subunit alpha	GNAI3
5.353	4.72095	P49257	P49257	Protein ERGIC-53	LMAN1
5.353	4.80227	Q6I9Y2;A0A024R341;F8WF22;H7C5E3	Q6I9Y2;A0A024R341	THO complex subunit 7 homolog	THOC7;NIF3L1BP1
5.353	4.78405	E9PJK1;E9PRJ8;H0YDL9;H0YDJ9;E9PIF1;A6NMH8;P60033;E9PM31;H0YEE2	E9PJK1;E9PRJ8;H0YDL9;H0YDJ9;E9PIF1;A6NMH8;P60033	Tetraspanin;CD81 antigen	CD81
5.352	3.83623	Q9UNN5;B1ANM7;Q9UNN5-2;B3KT28	Q9UNN5;B1ANM7;Q9UNN5-2;B3KT28	FAS-associated factor 1	FAF1
5.351	NaN	Q9Y3D8;Q9Y3D8-2;A0A087WVD7;D6RDH4;A0A087WY94	Q9Y3D8;Q9Y3D8-2;A0A087WVD7;D6RDH4	Adenylate kinase isoenzyme 6	AK6;TAF9
5.349	5.08807	Q969G3;B4DGM3;Q969G3-2;Q969G3-4;J3QKS7;Q969G3-5;Q969G3-3;Q969G3-6;K7EMQ8;H7C048;J3QR61;J3KT85;J3QKX6;J3KS99;J3QL66	Q969G3;B4DGM3;Q969G3-2;Q969G3-4;J3QKS7;Q969G3-5;Q969G3-3;Q969G3-6;K7EMQ8	SWI/SNF-related matrix-associated actin-dependent regulator of chromatin subfamily E member 1	SMARCE1
5.349	4.28218	P78346-2;P78346;Q5VU11;Q5VU10	P78346-2;P78346;Q5VU11;Q5VU10	Ribonuclease P protein subunit p30	RPP30
5.349	3.57371	P51965;H7C061;P51965-2;C9J2P0;B7Z306	P51965;H7C061;P51965-2;C9J2P0;B7Z306	Ubiquitin-conjugating enzyme E2 E1	UBE2E1
5.349	4.81714	Q9NWH9;Q9NWH9-3;H7C3F4;H7BXE3;H0YMM0;H0YL55;H0YLE6;H0YNF3;H0YMR6;H0YKH2;H0YMW8;H0YKU6;H0YLW7	Q9NWH9;Q9NWH9-3;H7C3F4	SAFB-like transcription modulator	SLTM
5.349	5.55494	P84095	P84095	Rho-related GTP-binding protein RhoG	RHOG
5.348	4.82068	Q8WVM8;Q8WVM8-2;Q8WVM8-3;J3KNG4;G3V2M8;G3V4I1;G3V5F3;H0YJS6;G3V3K9;G3V363;H0YJY1;G3V5E2;H0YIZ7	Q8WVM8;Q8WVM8-2;Q8WVM8-3	Sec1 family domain-containing protein 1	SCFD1
5.348	3.94816	Q13571	Q13571	Lysosomal-associated transmembrane protein 5	LAPTM5
5.348	5.70912	Q9NZ45	Q9NZ45	CDGSH iron-sulfur domain-containing protein 1	CISD1
5.347	4.92288	Q9H0C8;F8SNU7;H7C2I8;E9PC05;F8SNU6	Q9H0C8;F8SNU7	Integrin-linked kinase-associated serine/threonine phosphatase 2C	ILKAP;ILKAP3
5.346	3.57162	O15294;O15294-2;O15294-4;C9JZL3	O15294;O15294-2;O15294-4	UDP-N-acetylglucosamine--peptide N-acetylglucosaminyltransferase 110 kDa subunit	OGT
5.344	4.77578	Q9NW64;Q9NW64-2;E5RJW4;E5RHA8	Q9NW64;Q9NW64-2	Pre-mRNA-splicing factor RBM22	RBM22
5.344	NaN	Q9Y248;M0QXS3;M0R043	Q9Y248	DNA replication complex GINS protein PSF2	GINS2
5.344	4.74184	Q00403;B1APE2;B1APE1	Q00403;B1APE2;B1APE1	Transcription initiation factor IIB	GTF2B
5.343	4.78768	Q9BYD1;E5RJI7;H0YAX3;E5RFI2	Q9BYD1;E5RJI7	39S ribosomal protein L13, mitochondrial	MRPL13
5.343	NaN	Q9BPZ3;D6R9Y1;D6RA77	Q9BPZ3	Polyadenylate-binding protein-interacting protein 2	PAIP2
5.342	3.87094	Q13541	Q13541	Eukaryotic translation initiation factor 4E-binding protein 1	EIF4EBP1
5.342	4.82099	Q16864;Q16864-2	Q16864;Q16864-2	V-type proton ATPase subunit F	ATP6V1F
5.342	4.64788	Q5TBB1;A0A087WXR7;Q5TBB1-2;A0A087WZJ6;A0A1B0GTJ2;A0A1B0GUE7	Q5TBB1;A0A087WXR7;Q5TBB1-2	Ribonuclease H2 subunit B	RNASEH2B
5.34	4.66582	Q8WVK2;B8ZZ98;H0YBW5	Q8WVK2;B8ZZ98	U4/U6.U5 small nuclear ribonucleoprotein 27 kDa protein	SNRNP27
5.34	4.62957	Q13868;A3KFL2;Q13868-2;A3KFL5;Q13868-3;A3KFL1	Q13868;A3KFL2;Q13868-2;A3KFL5;Q13868-3;A3KFL1	Exosome complex component RRP4	EXOSC2
5.339	3.80133	P57081;P57081-2;P57081-3	P57081;P57081-2;P57081-3	tRNA (guanine-N(7)-)-methyltransferase non-catalytic subunit WDR4	WDR4
5.339	4.76245	P25774;P25774-2;U3KPS4;U3KQE7	P25774;P25774-2;U3KPS4	Cathepsin S	CTSS
5.339	5.64596	Q96I99;Q96I99-2;E9PDQ8;H0Y852	Q96I99;Q96I99-2;E9PDQ8	Succinyl-CoA ligase [GDP-forming] subunit beta, mitochondrial	SUCLG2
5.338	5.27966	Q9H1E3;Q9H1E3-2	Q9H1E3;Q9H1E3-2	Nuclear ubiquitous casein and cyclin-dependent kinase substrate 1	NUCKS1
5.338	4.61066	P61011;P61011-2;G3V4F7;G3V480;G3V346;A0A0D9SFN7;G3V3L9	P61011;P61011-2;G3V4F7	Signal recognition particle 54 kDa protein	SRP54
5.338	4.55502	Q9BUT1;Q9BUT1-2;D6R9U8;D6RIR6;Q9BUT1-3;D6R9P2;D6RFG2;D6RBF6	Q9BUT1;Q9BUT1-2;D6R9U8;D6RIR6;Q9BUT1-3	3-hydroxybutyrate dehydrogenase type 2	BDH2
5.337	NaN	Q8NBT2;Q8NBT2-2	Q8NBT2;Q8NBT2-2	Kinetochore protein Spc24	SPC24
5.337	4.09215	Q96SB4;H3BLV9;Q96SB4-4;Q96SB4-3;D6RBF8;D6RBM8;A8MPP7;A8MPY5;E7ETV6;Q9UPE1-2;Q9UPE1-3;Q9UPE1-4;Q9UPE1;H7C2I2	Q96SB4;H3BLV9;Q96SB4-4;Q96SB4-3	SRSF protein kinase 1	SRPK1
5.336	5.24405	Q02218;E9PCR7;E9PDF2;A0A0D9SFS3;E9PFG7;Q02218-3;C9J4G7	Q02218;E9PCR7;E9PDF2;A0A0D9SFS3;E9PFG7	2-oxoglutarate dehydrogenase, mitochondrial	OGDH
5.336	4.19267	Q92747;E9PF58;Q92747-2;F8WFD3	Q92747;E9PF58;Q92747-2	Actin-related protein 2/3 complex subunit 1A	ARPC1A
5.336	4.77656	Q9H0W9;A0A087WT99;Q9H0W9-2;Q9H0W9-3;E9PQS1;E9PPB5;Q9H0W9-4;E9PJU8;E9PIP1;E9PSC3;E9PLC5;E9PLB3;E9PR95	Q9H0W9;A0A087WT99;Q9H0W9-2;Q9H0W9-3;E9PQS1;E9PPB5;Q9H0W9-4;E9PJU8	Ester hydrolase C11orf54	C11orf54
5.336	4.94484	Q92925-3;J3KMX2;B9EGA3;Q92925;Q92925-2;J3QWB6;J3QQL7	Q92925-3;J3KMX2;B9EGA3;Q92925;Q92925-2;J3QWB6	SWI/SNF-related matrix-associated actin-dependent regulator of chromatin subfamily D member 2	SMARCD2
5.335	4.97258	Q9NTM9;Q5TCZ7;A0A0B4J226	Q9NTM9;Q5TCZ7	Copper homeostasis protein cutC homolog	CUTC
5.334	4.74279	Q16539;B4E0K5;Q16539-3;Q16539-5;Q16539-4;B5TY33;E7EX54;H7C4E2	Q16539;B4E0K5;Q16539-3;Q16539-5;Q16539-4;B5TY33	Mitogen-activated protein kinase 14	MAPK14
5.334	2.38104	Q9ULW0;Q9ULW0-2	Q9ULW0;Q9ULW0-2	Targeting protein for Xklp2	TPX2
5.333	4.23547	D6RAM3;Q7L591;D6RC22;D6R951;D6R977;D6RAV2;D6RAZ9;D6RF29	D6RAM3;Q7L591;D6RC22	Docking protein 3	DOK3
5.332	4.38719	Q8N6H7;G5E9L0;A0A0D9SF70;Q8N6H7-2;Q8N6H7-3;E9PQP3;E9PIY6;H0YDN9;E9PMU9;E9PK28;E9PJT7;H0YF45;H0YDX1;E9PMR9;E9PM63;E9PNY8;E9PM18;B0QYV9	Q8N6H7;G5E9L0;A0A0D9SF70;Q8N6H7-2;Q8N6H7-3;E9PQP3;E9PIY6	ADP-ribosylation factor GTPase-activating protein 2	ARFGAP2
5.332	4.59175	Q9H2J4;H7BZP2;C9JST4	Q9H2J4	Phosducin-like protein 3	PDCL3
5.331	4.64949	Q8N5N7;Q8N5N7-2	Q8N5N7;Q8N5N7-2	39S ribosomal protein L50, mitochondrial	MRPL50
5.331	4.52496	Q86U44;F5H6D8;B4DTN4;B4E349;H0YFV6;Q86U44-2	Q86U44;F5H6D8;B4DTN4	N6-adenosine-methyltransferase 70 kDa subunit	METTL3
5.331	4.33448	Q92922;F8WE13	Q92922	SWI/SNF complex subunit SMARCC1	SMARCC1
5.331	4.30718	Q92769;Q92769-3;H3BM24;E5RH52;E5RG37;E5RFI6;E5RJ04;E5RGV4;E5RHE7;E5RFP9;E5RK19	Q92769;Q92769-3	Histone deacetylase 2	HDAC2
5.331	4.04169	Q9P0U1;B5MD00;A0A087WZY2;A6NIV2	Q9P0U1;B5MD00;A0A087WZY2;A6NIV2	Mitochondrial import receptor subunit TOM7 homolog	TOMM7
5.331	5.84337	A0A087WYP2;Q8IZQ5;H0YE28;H3BV83	A0A087WYP2;Q8IZQ5;H0YE28	Selenoprotein H	C11orf31;SELH
5.331	4.07203	Q9NZM5;M0QZ34;M0QX73;M0QYZ9;M0QZU5	Q9NZM5	Glioma tumor suppressor candidate region gene 2 protein	GLTSCR2
5.329	5.3527	Q96C86	Q96C86	m7GpppX diphosphatase	DCPS
5.329	4.23238	A0A024R4E5;Q00341;Q00341-2;H0Y394;H7C0A4;C9J5E5;C9JIZ1;H7BZC3;H7C2D1;C9JZI8;C9JHZ8;C9JES8;C9JHS7;C9JT62;C9JK79;C9JBS3;C9JEJ8;C9JHN6;C9JQ82;C9JMQ6;H7C3D0;C9JHS9;C9J739	A0A024R4E5;Q00341;Q00341-2;H0Y394	Vigilin	HDLBP
5.328	4.74406	Q9NQC3-2;F8W914	Q9NQC3-2;F8W914	Reticulon-4;Reticulon	RTN4
5.328	4.16878	Q9NVS9;Q9NVS9-3;Q9NVS9-4;J3QQV6	Q9NVS9;Q9NVS9-3;Q9NVS9-4;J3QQV6	Pyridoxine-5-phosphate oxidase	PNPO
5.328	3.65772	Q9Y4P1;Q9Y4P1-6;Q9Y4P1-2;C9JQ72;C9JIK8;Q9Y4P1-4;Q9Y4P1-3;F2Z2K8;C9J3C0;H0Y2Y0;C9JVD5;H7C2A6;C9J1C1	Q9Y4P1;Q9Y4P1-6;Q9Y4P1-2;C9JQ72;C9JIK8;Q9Y4P1-4	Cysteine protease ATG4B	ATG4B
5.328	4.66113	Q6UN15;Q6UN15-5;Q6UN15-3;Q6UN15-4;A0A0B4J203;H0Y8P7	Q6UN15;Q6UN15-5;Q6UN15-3;Q6UN15-4;A0A0B4J203	Pre-mRNA 3-end-processing factor FIP1	FIP1L1
5.327	4.24869	P61927	P61927	60S ribosomal protein L37	RPL37
5.327	4.46536	Q9Y6Y8;Q9Y6Y8-2;A0A0C4DH82;H7C0V8;H7C4C4;REV__H7BYP9;REV__O15068-5;REV__O15068-4;REV__O15068-3;REV__O15068-2;REV__O15068-6;REV__O15068-8;REV__O15068-10;REV__O15068-9;REV__O15068	Q9Y6Y8;Q9Y6Y8-2	SEC23-interacting protein	SEC23IP
5.327	4.94056	O95747;C9JIG9;F8WBK9	O95747;C9JIG9	Serine/threonine-protein kinase OSR1	OXSR1
5.326	4.49095	P49354;E9PQP6;P49354-2;B3KVN2;H0YCW1;E9PPM9;E9PN85	P49354;E9PQP6;P49354-2;B3KVN2;H0YCW1	Protein farnesyltransferase/geranylgeranyltransferase type-1 subunit alpha	FNTA
5.326	4.03957	P36639-4;P36639-3;P36639-2;P36639;C9J361	P36639-4;P36639-3;P36639-2;P36639	7,8-dihydro-8-oxoguanine triphosphatase	NUDT1
5.325	4.54384	Q9H9Q2;A0A087X1P5;J3KQ34;Q9H9Q2-2;J3QT73;J3KQ41;Q9H9Q2-3;J3QT95;J3KQV6;J3QT67;J3QT66;J3QT69;J3QT50;J3QT43	Q9H9Q2;A0A087X1P5;J3KQ34;Q9H9Q2-2;J3QT73	COP9 signalosome complex subunit 7b	COPS7B
5.324	4.75109	Q9HCD5;Q5JY17;REV__Q9HCD5	Q9HCD5	Nuclear receptor coactivator 5	NCOA5
5.323	4.26188	Q15397;S4R3K8	Q15397	Pumilio domain-containing protein KIAA0020	KIAA0020
5.323	4.49104	Q96GX9;S4R3D6;Q96GX9-3	Q96GX9;S4R3D6;Q96GX9-3	Methylthioribulose-1-phosphate dehydratase	APIP
5.323	5.75949	Q9HC38-2;F6TLX2;Q9HC38;I3L3Q4;Q9HC38-3;I3L1F4;I3L1I0;I3NI27;I3NI24;I3L2C2;I3L277	Q9HC38-2;F6TLX2;Q9HC38;I3L3Q4;Q9HC38-3	Glyoxalase domain-containing protein 4	GLOD4
5.323	3.88031	P18858;P18858-3;F5GZ28;P18858-2;M0R0Q7;B4E135;M0QY71;M0R1G7	P18858;P18858-3;F5GZ28;P18858-2;M0R0Q7	DNA ligase 1;DNA ligase	LIG1
5.323	3.07882	E9PGQ0;Q96H78	E9PGQ0;Q96H78	Solute carrier family 25 member 44	SLC25A44
5.323	4.52969	O15498;O15498-2;H7C3K7	O15498;O15498-2	Synaptobrevin homolog YKT6	YKT6
5.323	5.31776	O43920	O43920	NADH dehydrogenase [ubiquinone] iron-sulfur protein 5	NDUFS5
5.321	4.62841	O60885;O60885-2;O60885-3;M0QZD9;M0QYW0;M0R0H4;Q58F21-5;Q58F21-4;Q58F21;Q58F21-3;Q58F21-2	O60885;O60885-2;O60885-3	Bromodomain-containing protein 4	BRD4
5.32	3.91002	C9JZY6;P62256;H7C4M9;P62256-2;C9JZG9;C9J8Q9	C9JZY6;P62256;H7C4M9;P62256-2;C9JZG9	Ubiquitin-conjugating enzyme E2 H	UBE2H
5.319	3.28337	Q9Y5Y6	Q9Y5Y6	Suppressor of tumorigenicity 14 protein	ST14
5.319	5.05078	P61964;V9GZ59;V9GYQ5;Q86VZ2	P61964	WD repeat-containing protein 5	WDR5
5.319	5.37592	Q9P016;Q9P016-2	Q9P016;Q9P016-2	Thymocyte nuclear protein 1	THYN1
5.318	NaN	Q99622;U3KQ85;F5GXW5;U3KQ07	Q99622;U3KQ85;F5GXW5;U3KQ07	Protein C10	C12orf57
5.318	4.13039	P53367;P53367-3	P53367;P53367-3	Arfaptin-1	ARFIP1
5.318	4.32096	Q13158	Q13158	FAS-associated death domain protein	FADD
5.317	4.5659	Q9NVT9;E5RJ86;E5RHK3;E9PR92;Q9NVT9-2	Q9NVT9;E5RJ86	Armadillo repeat-containing protein 1	ARMC1
5.317	5.18138	Q96F07-2;E7EVJ5;Q96F07;H7C229;E7EW33;Q7L576;A0A0G2JR96;A0A0G2JQT1;Q7L576-2;A0A087WWZ1;A0A087WTQ3;Q7L576-3;A0A087WVE1;A0A0G2JRX2;A0A087WU52;A0A0G2JRV9;A0A087WWL1;H0YL50;A0A087WZL7;A0A087WV63;A0A0G2JRF5;A0A087WWY5;A0A0G2JQH3;A0A087WVZ5	Q96F07-2;E7EVJ5;Q96F07;H7C229;E7EW33	Cytoplasmic FMR1-interacting protein 2	CYFIP2
5.317	4.7592	Q7Z3B4-3;Q7Z3B4;Q7Z3B4-2	Q7Z3B4-3;Q7Z3B4;Q7Z3B4-2	Nucleoporin p54	NUP54
5.316	4.62743	Q9Y5L0;C9J7E5;Q9Y5L0-3;Q9Y5L0-1;E9PFH4;Q9Y5L0-5	Q9Y5L0;C9J7E5;Q9Y5L0-3;Q9Y5L0-1;E9PFH4;Q9Y5L0-5	Transportin-3	TNPO3
5.316	5.12586	Q29RF7;Q29RF7-3;H0Y9L9;H0Y9L6;H0Y9X6	Q29RF7	Sister chromatid cohesion protein PDS5 homolog A	PDS5A
5.315	5.47785	Q9NXG2;H3BNW0	Q9NXG2	THUMP domain-containing protein 1	THUMPD1
5.315	4.52781	Q9BSH4	Q9BSH4	Translational activator of cytochrome c oxidase 1	TACO1
5.315	2.81411	Q71RC2;Q71RC2-4;Q71RC2-5;Q71RC2-6;X6RLN4;Q71RC2-7;Q96J85;Q8TBL5;A0A087WTL9;F8W1I4;F8W1Z5;E5RHZ8;F8VSA9;F8VZ60;F8VNV1	Q71RC2;Q71RC2-4;Q71RC2-5;Q71RC2-6;X6RLN4;Q71RC2-7;Q96J85	La-related protein 4	LARP4
5.315	4.31582	J3KRP6;J3QS72;X6R3J2;J3QQM2;J3KT74;J3QQW2;Q15532-2;Q15532;F5GWN1;J3QSB3;J3QSG1;J3QQW6;J3QLJ7;J3QQX5;J3KT22;B4DLD3	J3KRP6;J3QS72;X6R3J2;J3QQM2;J3KT74;J3QQW2;Q15532-2;Q15532;F5GWN1	Protein SSXT	SS18
5.315	4.50222	Q9P035;H3BS72;H3BPZ1;Q9P035-2;H3BRL8;H3BMZ1	Q9P035;H3BS72;H3BPZ1	Very-long-chain (3R)-3-hydroxyacyl-CoA dehydratase 3	HACD3
5.314	5.32942	P07384;E9PRM1;E9PLX0;E9PJJ3;E9PLC9;E9PMC6;E9PJA6;E9PSA6;E9PQB3;E9PL37;E9PIA9	P07384	Calpain-1 catalytic subunit	CAPN1
5.314	5.10906	Q92608;E7ERW7;E5RFJ0;F6S220;Q92608-2;H0YB76;H0Y7N4	Q92608;E7ERW7;E5RFJ0	Dedicator of cytokinesis protein 2	DOCK2
5.314	4.44941	Q07866-7;Q07866-6;Q07866-4;G3V5R9;Q07866-9;H0YG16;H0YJK1	Q07866-7;Q07866-6;Q07866-4;G3V5R9;Q07866-9	Kinesin light chain 1	KLC1
5.313	4.83498	O75348;F2Z307;O95670-2;O95670	O75348	V-type proton ATPase subunit G 1	ATP6V1G1
5.311	3.62641	P78330;C9JBI3;C9JEJ7;F8WD74	P78330;C9JBI3	Phosphoserine phosphatase	PSPH
5.31	5.54268	P83916;J3KS05;B5MD17;K7ELA4;C9JWS9	P83916;J3KS05;B5MD17;K7ELA4	Chromobox protein homolog 1	CBX1
5.31	4.54491	O95169;O95169-3;E9PQ68;O95169-2;K9J7I2;E9PIZ8	O95169;O95169-3;E9PQ68;O95169-2;K9J7I2	NADH dehydrogenase [ubiquinone] 1 beta subcomplex subunit 8, mitochondrial	NDUFB8
5.31	4.75503	P33240-2;P33240;E7EWR4;E9PID8;A0A0A0MT56	P33240-2;P33240;E7EWR4;E9PID8	Cleavage stimulation factor subunit 2	CSTF2
5.309	4.37291	Q96P16;Q96P16-3;A0A0C4DGQ6;K7EP82;K7ER50;K7EQR8	Q96P16;Q96P16-3;A0A0C4DGQ6	Regulation of nuclear pre-mRNA domain-containing protein 1A	RPRD1A
5.309	2.83599	Q14181;Q14181-2;E9PIQ6;H0YDR7;E9PQ99	Q14181	DNA polymerase alpha subunit B	POLA2
5.309	5.34401	Q8WUW1;Q8WUW1-2	Q8WUW1;Q8WUW1-2	Protein BRICK1	BRK1
5.308	4.54187	Q6PL24	Q6PL24	Protein TMED8	TMED8
5.308	NaN	Q14807;Q14807-2;H3BRB3;H3BTH5;I3L306;H3BQB9	Q14807;Q14807-2;H3BRB3	Kinesin-like protein KIF22;Kinesin-like protein	KIF22
5.307	3.86331	O00488;A9J4F5	O00488;A9J4F5	Zinc finger protein 593	ZNF593
5.307	4.89604	Q12765;Q12765-2;Q12765-3;C9K052;C9J7U9;B8ZZP4	Q12765;Q12765-2;Q12765-3	Secernin-1	SCRN1
5.307	4.68932	Q0VGL1;A0A087WT92;A0A087WV46;C9JXA7;A0A087WVU0	Q0VGL1;A0A087WT92;A0A087WV46;C9JXA7	Ragulator complex protein LAMTOR4;Ragulator complex protein LAMTOR4, N-terminally processed	LAMTOR4
5.306	4.13124	P34896-2;P34896;P34896-3;P34896-4;J3KRZ5;J3KRK5;A0A087WTD8	P34896-2;P34896;P34896-3;P34896-4	Serine hydroxymethyltransferase, cytosolic	SHMT1
5.306	5.76859	O00151	O00151	PDZ and LIM domain protein 1	PDLIM1
5.306	4.84264	Q8WZA0;Q8WZA0-2;K7ES95	Q8WZA0;Q8WZA0-2;K7ES95	Protein LZIC	LZIC
5.306	4.95306	O75746;O75746-2;F8W9J0;H0YFB2;B4DGK6	O75746;O75746-2	Calcium-binding mitochondrial carrier protein Aralar1	SLC25A12
5.305	3.32736	Q8WVX9;E9PNW8;E9PPB8	Q8WVX9;E9PNW8	Fatty acyl-CoA reductase 1	FAR1
5.304	NaN	Q8TB45;Q8TB45-2	Q8TB45;Q8TB45-2	DEP domain-containing mTOR-interacting protein	DEPTOR
5.304	4.65965	F5GXX5;P61803;F5H895;A0A0B4J239	F5GXX5;P61803;F5H895;A0A0B4J239	Dolichyl-diphosphooligosaccharide--protein glycosyltransferase subunit DAD1	DAD1
5.304	4.31034	Q8IXB1;Q8IXB1-2;Q8IXB1-3;E7EP04;Q71S60;A0A087WXH7;H7C1G0	Q8IXB1;Q8IXB1-2	DnaJ homolog subfamily C member 10	DNAJC10
5.304	4.96114	Q92878;Q92878-2;Q92878-3;E7EN38;E7ESD9;H7C0P8;E9PM98;H7C0V2;C9JNH8;A0A1W2PPC4	Q92878;Q92878-2;Q92878-3	DNA repair protein RAD50	RAD50
5.304	5.39907	P20273;P20273-5;P20273-3;P20273-2;M0R3H1;M0R0R6;M0QY14;M0R1M2;A0A087WZQ4;M0QYP4;M0R2M0;M0R2R8;M0QY05;M0QZR7;M0QZ01	P20273;P20273-5;P20273-3;P20273-2	B-cell receptor CD22	CD22
5.303	3.96759	Q3MHD2;Q3MHD2-2	Q3MHD2;Q3MHD2-2	Protein LSM12 homolog	LSM12
5.303	4.63739	Q9Y3B2;R4GNH9;B1AMU7;B1AMU4;R4GMQ7;B1AMU3	Q9Y3B2;R4GNH9;B1AMU7;B1AMU4;R4GMQ7;B1AMU3	Exosome complex component CSL4	EXOSC1
5.302	4.74345	Q9UBU9;E9PIN3;Q9UBU9-2;B4E227;H0YDU0;E9PQA4	Q9UBU9;E9PIN3;Q9UBU9-2	Nuclear RNA export factor 1	NXF1
5.3	3.55484	Q7Z417;Q7Z417-2	Q7Z417	Nuclear fragile X mental retardation-interacting protein 2	NUFIP2
5.3	4.1475	Q13144;C9JRD9;H7C2X0	Q13144	Translation initiation factor eIF-2B subunit epsilon	EIF2B5
5.3	5.03077	P36954;K7EKS1;K7EK49	P36954;K7EKS1	DNA-directed RNA polymerase II subunit RPB9	POLR2I
5.299	4.12775	O43924;B8ZZK5;C9IZ52	O43924;B8ZZK5;C9IZ52	Retinal rod rhodopsin-sensitive cGMP 3,5-cyclic phosphodiesterase subunit delta	PDE6D
5.299	4.54425	I3L2L5;I3L4Q0;C9JLW8;I3L317;I3L3A7	I3L2L5;I3L4Q0;C9JLW8;I3L317	Protein FAM195B	FAM195B
5.299	4.1406	K7ENF0	K7ENF0		NARS
5.298	4.57864	O15127;H3BV04;H3BN93;H3BPL9	O15127	Secretory carrier-associated membrane protein 2	SCAMP2
5.298	5.15584	Q14344;Q14344-2	Q14344;Q14344-2	Guanine nucleotide-binding protein subunit alpha-13	GNA13
5.298	4.44383	P09086-2;P09086;P09086-5;H0YNW1;H0YLL6;B5ME60;P09086-4;P09086-3;H0YKT2;U3KQ96;U3KQN1;E9PR37;A0A1B0GW97;A0A1B0GUT9;M0R1I6;A0A1B0GV81	P09086-2;P09086;P09086-5;H0YNW1;H0YLL6;B5ME60;P09086-4;P09086-3;H0YKT2;U3KQ96	POU domain, class 2, transcription factor 2;POU domain protein	POU2F2
5.298	5.16017	B4E0Y9;Q9P289;Q8NBY1;Q9P289-2;Q9P289-3;C9JJV0	B4E0Y9;Q9P289;Q8NBY1;Q9P289-2;Q9P289-3	Serine/threonine-protein kinase 26	STK26
5.297	4.57417	Q6FGG4;O95167;H7C0D7;S4R3I5;H7C2R1;A8MVM8;S4R3T6;A8MYJ8	Q6FGG4;O95167;H7C0D7;S4R3I5;H7C2R1;A8MVM8;S4R3T6;A8MYJ8	NADH dehydrogenase [ubiquinone] 1 alpha subcomplex subunit 3	NDUFA3
5.296	4.81585	Q9NX58;D6RDJ1	Q9NX58	Cell growth-regulating nucleolar protein	LYAR
5.296	5.08877	Q9GZP4;Q9GZP4-2;X6R8S9;X6RHB9	Q9GZP4;Q9GZP4-2;X6R8S9	PITH domain-containing protein 1	PITHD1
5.295	3.20834	Q96GD4-5;Q96GD4;Q96GD4-4;Q96GD4-2;J3QLN8;J3KT86;J3KTD6;J3QR41;Q96GD4-3;J3KRF8;J3KRJ2;A0A0A0MSY3;Q5Y191;Q9UQB9-2;Q9UQB9-3;Q9UQB9;B4DXA6;M0QYK8	Q96GD4-5;Q96GD4;Q96GD4-4;Q96GD4-2;J3QLN8;J3KT86;J3KTD6;J3QR41	Aurora kinase B	AURKB
5.294	3.87484	P36404;V9GYD0;P36404-2	P36404;V9GYD0;P36404-2	ADP-ribosylation factor-like protein 2	ARL2;ARL2-SNX15
5.294	3.39154	Q14353;A0A1W2PR36;Q14353-2;K7EM34	Q14353;A0A1W2PR36;Q14353-2	Guanidinoacetate N-methyltransferase	GAMT
5.294	3.57905	Q8TDD1;Q8TDD1-2;H0YHH7;F8VRX4;H0YHZ9	Q8TDD1;Q8TDD1-2	ATP-dependent RNA helicase DDX54	DDX54
5.294	4.33648	P25208;F8VSL3	P25208;F8VSL3	Nuclear transcription factor Y subunit beta	NFYB
5.294	5.20533	Q86UE4;E5RJU9;H0YB56;H0YBJ8;H0YBE0	Q86UE4;E5RJU9	Protein LYRIC	MTDH
5.293	NaN	P52306-4;D6REZ0;D6RC85	P52306-4
5.293	5.03753	O95218-2;O95218	O95218-2;O95218	Zinc finger Ran-binding domain-containing protein 2	ZRANB2
5.292	3.77313	K4DI92;Q6NW29;E7EV43;Q6NW29-2;D6RCM5;D6RDH6;D6R9C7	K4DI92;Q6NW29;E7EV43;Q6NW29-2	RWD domain-containing protein 4	RWDD4
5.292	5.39233	P05976-2;P05976;P08590	P05976-2;P05976;P08590	Myosin light chain 1/3, skeletal muscle isoform;Myosin light chain 3	MYL1;MYL3
5.292	4.71172	Q8N183;H0YA50;D6RA56	Q8N183	Mimitin, mitochondrial	NDUFAF2
5.291	2.91698	Q8N543;A0A0A0MTR2;Q8N543-2;H3BUA6;H3BR79;H3BR02;H3BP48	Q8N543;A0A0A0MTR2;Q8N543-2	Prolyl 3-hydroxylase OGFOD1	OGFOD1
5.291	3.94432	Q9BTY7;E9PIX0	Q9BTY7	Protein HGH1 homolog	HGH1
5.291	4.62703	Q6RFH5;Q6RFH5-2;E9PS41;H0YFP2;F5GYL6;F5H0Q8	Q6RFH5;Q6RFH5-2;E9PS41	WD repeat-containing protein 74	WDR74
5.29	5.30969	P82979;F8VZQ9;F8VS12	P82979;F8VZQ9	SAP domain-containing ribonucleoprotein	SARNP
5.29	4.24092	Q92665	Q92665	28S ribosomal protein S31, mitochondrial	MRPS31
5.29	3.06252	Q9BZX2;Q9BZX2-2	Q9BZX2	Uridine-cytidine kinase 2	UCK2
5.29	4.79664	P09543-2;P09543;K7ERC4;C9K0L8;K7ERZ0;K7EN66	P09543-2;P09543	2,3-cyclic-nucleotide 3-phosphodiesterase	CNP
5.29	4.48439	Q9Y2Z4;H0YHS6	Q9Y2Z4;H0YHS6	Tyrosine--tRNA ligase, mitochondrial;Tyrosine--tRNA ligase	YARS2
5.29	4.23313	Q96FX7;H0Y2Q1	Q96FX7;H0Y2Q1	tRNA (adenine(58)-N(1))-methyltransferase catalytic subunit TRMT61A	TRMT61A
5.289	4.29086	Q14694;Q14694-3;Q14694-2;J3KT19;H3BQP1;H3BNA1;H3BVF1;H3BNS8;H3BQC6;H3BNL0;Q68D90	Q14694;Q14694-3;Q14694-2	Ubiquitin carboxyl-terminal hydrolase 10	USP10
5.289	4.19089	Q9H446;E5RGQ3;Q9H446-2;E5RGS5;E5RJE3	Q9H446;E5RGQ3;Q9H446-2	RWD domain-containing protein 1	RWDD1
5.289	5.00427	O94874;O94874-2;O94874-3	O94874;O94874-2;O94874-3	E3 UFM1-protein ligase 1	UFL1
5.289	5.51636	Q14005-3;Q14005-2;Q14005;H0YLH9;Q14005-4	Q14005-3;Q14005-2;Q14005;H0YLH9;Q14005-4	Pro-interleukin-16;Interleukin-16	IL16
5.289	4.40152	Q9UN37;I3L4J1	Q9UN37;I3L4J1	Vacuolar protein sorting-associated protein 4A	VPS4A
5.289	4.46833	A0A0A0MTB8;Q8NI36	A0A0A0MTB8;Q8NI36	WD repeat-containing protein 36	WDR36
5.289	4.0733	O94817	O94817	Ubiquitin-like protein ATG12	ATG12
5.289	4.8453	K7EN05;K7EPC8;A0A024R7E8;K7EQ44;K7EMV4;P60002	K7EN05;K7EPC8;A0A024R7E8;K7EQ44;K7EMV4;P60002	Transcription elongation factor 1 homolog	ELOF1
5.288	4.52159	C9JAX1;Q16595;H7C585;Q16595-2;Q16595-3	C9JAX1;Q16595;H7C585	Frataxin, mitochondrial;Frataxin intermediate form;Frataxin(56-210);Frataxin(78-210);Frataxin mature form	FXN
5.288	5.11476	A0A087X2I2;A0A087WT12;P36969-2;P36969;K7ERP4;K7EKX7;K7ENB4;K7EJ20;R4GNE4;A0A0A0MTT1;A0A087X247	A0A087X2I2;A0A087WT12;P36969-2;P36969;K7ERP4;K7EKX7;K7ENB4;K7EJ20;R4GNE4;A0A0A0MTT1	Glutathione peroxidase;Phospholipid hydroperoxide glutathione peroxidase, mitochondrial	GPX4
5.288	5.36459	X6R700;Q9Y3Y2-4;Q9Y3Y2;Q9Y3Y2-3;A0A087X1B7;Q5T7Y7	X6R700;Q9Y3Y2-4;Q9Y3Y2;Q9Y3Y2-3;A0A087X1B7	Chromatin target of PRMT1 protein	CHTOP
5.288	4.37428	Q96EY7;Q96EY7-2;B8ZZQ4;F8WE76	Q96EY7	Pentatricopeptide repeat domain-containing protein 3, mitochondrial	PTCD3
5.287	4.73933	P24928;A0A087WWE2;P24928-2	P24928;A0A087WWE2	DNA-directed RNA polymerase II subunit RPB1;DNA-directed RNA polymerase	POLR2A
5.287	4.92285	E7EWP0;O43674-2;O43674;H0Y886;F8WDZ2;F8WDD2;A0A087WYD0	E7EWP0;O43674-2;O43674;H0Y886	NADH dehydrogenase [ubiquinone] 1 beta subcomplex subunit 5, mitochondrial	NDUFB5
5.287	4.87397	Q9NPF4;G3V445;G3V249	Q9NPF4	Probable tRNA N6-adenosine threonylcarbamoyltransferase	OSGEP
5.287	3.79288	P05362;K7EKL8;E7ESS4	P05362;K7EKL8	Intercellular adhesion molecule 1	ICAM1
5.286	2.39683	Q8WWI5-3;Q8WWI5-2;Q8WWI5	Q8WWI5-3;Q8WWI5-2;Q8WWI5	Choline transporter-like protein 1	SLC44A1
5.285	5.23176	Q02548-2;Q02548;Q02548-7;Q02548-6;Q02548-9;Q02548-8;E7ERW5;E7EQT0;Q02548-5;Q02548-4;Q02548-11;Q02548-3;Q02548-10;C0KTE2;H0YB47	Q02548-2;Q02548;Q02548-7;Q02548-6;Q02548-9;Q02548-8;E7ERW5;E7EQT0;Q02548-5;Q02548-4;Q02548-11;Q02548-3;Q02548-10	Paired box protein Pax-5	PAX5
5.285	4.29168	Q99805	Q99805	Transmembrane 9 superfamily member 2	TM9SF2
5.285	5.60942	P50552;K7EM16;K7ENL7;K7ENR7;K7EQD0;K7EIG8	P50552	Vasodilator-stimulated phosphoprotein	VASP
5.284	4.53827	Q8NEJ9-2;Q8NEJ9;H0YJ17;G3V4G1;H0YJQ1	Q8NEJ9-2;Q8NEJ9;H0YJ17	Neuroguidin	NGDN
5.283	5.21021	P55795	P55795	Heterogeneous nuclear ribonucleoprotein H2	HNRNPH2
5.283	4.85786	Q9GZT8-2;Q9GZT8;Q9GZT8-3;E7EXA3;Q6X734;B8ZZI0;H7C1A8;C9JN42	Q9GZT8-2;Q9GZT8;Q9GZT8-3;E7EXA3;Q6X734	NIF3-like protein 1	NIF3L1
5.283	4.66051	P49589-3;P49589;B4DKY1;P49589-2;E9PLP0;E9PRS8;C9JLN0	P49589-3;P49589;B4DKY1;P49589-2	Cysteine--tRNA ligase, cytoplasmic	CARS
5.282	4.61448	P51532-5;P51532-2;P51532-3;P51532-4;Q9HBD4;P51532;A0A0A0MT49;K7EP28	P51532-5;P51532-2;P51532-3;P51532-4;Q9HBD4;P51532;A0A0A0MT49	Transcription activator BRG1	SMARCA4
5.282	4.76828	Q13405;H0YDP7;E9PNF1;E9PI78	Q13405;H0YDP7;E9PNF1	39S ribosomal protein L49, mitochondrial	MRPL49
5.282	3.9994	O43592;F8WDU6;F5GYW6;F5GZM3	O43592	Exportin-T	XPOT
5.282	4.53504	Q9NP77;Q9NP77-2	Q9NP77;Q9NP77-2	RNA polymerase II subunit A C-terminal domain phosphatase SSU72	SSU72
5.282	4.73633	Q92797;A0A087WUE9;M0R3C7;Q92797-2;M0QXP5;M0R180;M0R1C2;M0R033;M0R039	Q92797;A0A087WUE9	Symplekin	SYMPK
5.282	4.47041	J9JIE6;Q9UM00;Q9UM00-2;J3QQY2;J3KS45;J3KTQ7	J9JIE6;Q9UM00;Q9UM00-2;J3QQY2;J3KS45	Transmembrane and coiled-coil domain-containing protein 1	TMCO1
5.282	5.03591	Q13630;E9PKL9;E9PP14;A0A0J9YX13;E9PLH9;H0YE90;H0YCP7;E9PP60	Q13630;E9PKL9;E9PP14;A0A0J9YX13	GDP-L-fucose synthase	TSTA3
5.281	3.88066	Q86X83;Q86X83-2;F8WBW1;F8WC41	Q86X83;Q86X83-2;F8WBW1;F8WC41	COMM domain-containing protein 2	COMMD2
5.28	4.63142	P78318	P78318	Immunoglobulin-binding protein 1	IGBP1
5.28	4.95642	P11171-2;P11171;P11171-5;Q4VB86;P11171-4;P11171-3;P11171-7;P11171-6;J3QS83;Q4VXN1;Q4VXN0	P11171-2;P11171;P11171-5;Q4VB86;P11171-4;P11171-3;P11171-7;P11171-6	Protein 4.1	EPB41
5.279	4.77478	Q2TAA2;H7C5G1;C9JE02;Q2TAA2-2;C9JDY4;C9J5J2;F8WF34;H7BXP8	Q2TAA2;H7C5G1;C9JE02	Isoamyl acetate-hydrolyzing esterase 1 homolog	IAH1
5.279	3.02477	O95394;O95394-3;O95394-4;J3KN95;A0A087WT27;D6RCQ8;D6RF77;D6RIS6;H0Y8I3;H0Y987;D6RCD1;D6RC77	O95394;O95394-3;O95394-4;J3KN95;A0A087WT27	Phosphoacetylglucosamine mutase	PGM3
5.278	3.64211	Q9NUQ3;Q9NUQ3-2;Q9BZA5	Q9NUQ3;Q9NUQ3-2	Gamma-taxilin	TXLNG
5.278	4.58985	Q5QJE6;J3KP30;E9PRB3	Q5QJE6;J3KP30	Deoxynucleotidyltransferase terminal-interacting protein 2	DNTTIP2
5.275	4.36235	Q8IUI4	Q8IUI4	Putative protein SNX29P2	SNX29P2
5.275	4.72964	Q92947;Q92947-2;K7EKT3;K7ES74;K7EKH1;K7EQ99;K7ESA6;K7ERX1	Q92947;Q92947-2	Glutaryl-CoA dehydrogenase, mitochondrial	GCDH
5.275	NaN	H6UMI1;O95166;I3L3J4	H6UMI1;O95166	Gamma-aminobutyric acid receptor-associated protein	GABARAP
5.274	4.79701	Q9NRY2;X6R8P6;Q9NRY2-2	Q9NRY2;X6R8P6	SOSS complex subunit C	INIP
5.274	4.47749	O95400	O95400	CD2 antigen cytoplasmic tail-binding protein 2	CD2BP2
5.274	NaN	Q53HL2	Q53HL2	Borealin	CDCA8
5.273	4.98414	Q00577	Q00577	Transcriptional activator protein Pur-alpha	PURA
5.273	4.50833	O95721;C9JAF7	O95721;C9JAF7	Synaptosomal-associated protein 29;Synaptosomal-associated protein	SNAP29
5.273	5.23175	Q99536;Q99536-3;Q99536-2;K7ESA3;K7ERT7;K7ENX2;K7EM19;K7EJM4;K7ER81	Q99536;Q99536-3;Q99536-2	Synaptic vesicle membrane protein VAT-1 homolog	VAT1
5.273	4.46768	Q6L8Q7;Q6L8Q7-2;F6T1Q0	Q6L8Q7;Q6L8Q7-2;F6T1Q0	2,5-phosphodiesterase 12	PDE12
5.272	5.05923	P62072	P62072	Mitochondrial import inner membrane translocase subunit Tim10	TIMM10
5.272	4.39525	A0A087WT20;Q9NV06;B3KME9;E5RHM4;A0A087X1F8;Q9NV06-2	A0A087WT20;Q9NV06;B3KME9	DDB1- and CUL4-associated factor 13	DCAF13
5.271	4.83168	O43865;O43865-2	O43865;O43865-2	Putative adenosylhomocysteinase 2	AHCYL1
5.271	5.09353	O60216;E5RFZ5;E5RI01;E5RFV8;E5RIN7;E5RG18;E5RJW1;E5RJK5;Q9H4I0;A0A140T8W2;Q9H4I0-2	O60216	Double-strand-break repair protein rad21 homolog	RAD21
5.269	4.66725	Q9BYD6;H0Y8N7	Q9BYD6;H0Y8N7	39S ribosomal protein L1, mitochondrial	MRPL1
5.269	2.8571	Q9BRK5;Q9BRK5-6;Q9BRK5-2;H0Y3T6;G3V1E2;Q9BRK5-4;Q9BRK5-3;Q9BRK5-5	Q9BRK5;Q9BRK5-6;Q9BRK5-2;H0Y3T6	45 kDa calcium-binding protein	SDF4
5.269	4.91036	Q8NF50;Q8NF50-2;A2A369;A2A370;F8WC95;E9PHZ4	Q8NF50;Q8NF50-2;A2A369	Dedicator of cytokinesis protein 8	DOCK8
5.269	4.60102	O75935-3;O75935;X6RCK5;X6RLR1;X6RA56;A0A0A0MRV8;O75935-2	O75935-3;O75935;X6RCK5;X6RLR1;X6RA56;A0A0A0MRV8;O75935-2	Dynactin subunit 3	DCTN3
5.268	3.02025	P49642;F8VNY2;F8VSB2	P49642;F8VNY2	DNA primase small subunit;DNA primase	PRIM1
5.267	4.38542	Q9H6R4-4;Q9H6R4;A0A0A0MRW6;Q9H6R4-2;Q9H6R4-3;A0A0C4DFX0	Q9H6R4-4;Q9H6R4;A0A0A0MRW6;Q9H6R4-2;Q9H6R4-3	Nucleolar protein 6	NOL6
5.267	4.21833	Q9BT73	Q9BT73	Proteasome assembly chaperone 3	PSMG3
5.266	4.52055	Q99747;Q99747-2;J3KTJ6;J3QS28;J3QKW4	Q99747;Q99747-2	Gamma-soluble NSF attachment protein	NAPG
5.266	NaN	Q8WUX2	Q8WUX2	Putative glutathione-specific gamma-glutamylcyclotransferase 2	CHAC2
5.266	6.00162	P15954;D6R9Z7	P15954;D6R9Z7	Cytochrome c oxidase subunit 7C, mitochondrial	COX7C
5.264	4.86053	Q8WXI9;A0A0U1RRM1;A0A0U1RR34;A0A0U1RR30;A0A0U1RRK3;A0A1B0GVS4;A0A1B0GW07	Q8WXI9;A0A0U1RRM1	Transcriptional repressor p66-beta	GATAD2B
5.264	4.0196	O00566;U3KQ48	O00566	U3 small nucleolar ribonucleoprotein protein MPP10	MPHOSPH10
5.263	5.10683	Q969X5;Q969X5-2;F2Z2U2;F2Z3Q5;Q969X5-3;F2Z2P5;A0A1B0GTQ3	Q969X5;Q969X5-2	Endoplasmic reticulum-Golgi intermediate compartment protein 1	ERGIC1
5.263	4.36945	Q9H6T3;Q9H6T3-2;Q9H6T3-3	Q9H6T3;Q9H6T3-2;Q9H6T3-3	RNA polymerase II-associated protein 3	RPAP3
5.263	4.63173	Q96G21;H0Y714;E7ENR5;B8ZZ47;B9A008;F8WCN0	Q96G21;H0Y714;E7ENR5;B8ZZ47;B9A008	U3 small nucleolar ribonucleoprotein protein IMP4	IMP4
5.263	4.47172	Q9BQ75-2;Q9BQ75;C9J384;H7C515	Q9BQ75-2;Q9BQ75;C9J384	Protein CMSS1	CMSS1
5.262	5.07915	Q9NX14;Q9NX14-2	Q9NX14;Q9NX14-2	NADH dehydrogenase [ubiquinone] 1 beta subcomplex subunit 11, mitochondrial	NDUFB11
5.262	4.28717	Q9Y6I9;C9JXQ7;C9JHH5;A0A087WTU3;C9JUC3;C9J7N0;C9JL43	Q9Y6I9;C9JXQ7;C9JHH5;A0A087WTU3	Testis-expressed sequence 264 protein	TEX264
5.262	4.77812	Q9NQT5;Q9NQT5-2	Q9NQT5;Q9NQT5-2	Exosome complex component RRP40	EXOSC3
5.261	4.85242	A0A0G2JH68;O60610;A0A140T8Z0;O60610-2;O60610-3;H9KV28;B4E2I7;E5RJ79;H7C2W8	A0A0G2JH68;O60610;A0A140T8Z0;O60610-2;O60610-3;H9KV28	Protein diaphanous homolog 1	DIAPH1
5.261	4.25224	Q9UBF2;Q9UBF2-2;H3BS45;F5H1S1;Q92521	Q9UBF2;Q9UBF2-2	Coatomer subunit gamma-2	COPG2
5.261	4.7433	Q9Y2S0;A0A0R4J2F3;Q7Z776;A0A087X0U2;A0A1B0GUZ5	Q9Y2S0;A0A0R4J2F3	DNA-directed RNA polymerases I and III subunit RPAC2	POLR1D
5.261	NaN	Q12824-2;G5E975;A0A0U1RQQ2	Q12824-2;G5E975	SWI/SNF-related matrix-associated actin-dependent regulator of chromatin subfamily B member 1	SMARCB1
5.261	5.47606	Q9UJ70;H7C3G9;Q9UJ70-2;C9JEV6;H7C1L7;H0YEB7;H0YC94;H0YE82	Q9UJ70;H7C3G9;Q9UJ70-2;C9JEV6	N-acetyl-D-glucosamine kinase	NAGK
5.26	4.73118	Q96Q11-2;Q96Q11;C9JRS7;F8W8C3;Q96Q11-3	Q96Q11-2;Q96Q11	CCA tRNA nucleotidyltransferase 1, mitochondrial	TRNT1
5.26	4.61092	Q9NYK5;Q9NYK5-2;C9JG87	Q9NYK5;Q9NYK5-2;C9JG87	39S ribosomal protein L39, mitochondrial	MRPL39
5.26	4.14225	Q8IUF8;Q8IUF8-2;Q8IUF8-3;D6RCB6;H0Y9L8	Q8IUF8;Q8IUF8-2	Bifunctional lysine-specific demethylase and histidyl-hydroxylase MINA	MINA
5.26	NaN	Q13885	Q13885	Tubulin beta-2A chain	TUBB2A
5.259	4.47193	Q13769;F8WCP5;C9JXG5;H7C072;H7C441;C9JCL9;F5GZF3;C9JXU6;F8WES8	Q13769;F8WCP5	THO complex subunit 5 homolog	THOC5
5.259	4.11666	A0A1W2PPG5;A0A1W2PPP5;A0A1W2PPG1;A0A1W2PQM3;A0A1W2PS81;E7EQ34;I3NI02;O14653;O14653-2;A0A1W2PRV0;O14653-3;A0A1W2PR23;A0A1W2PPJ0;A0A1W2PPW8;A0A1W2PR02;A0A1W2PRP7;I3L0K1;I3L4Z6;A0A1W2PRC2;I3L1K7;A0A1W2PS12;A0A1X7SBU8;A0A1W2PRL0;A0A1W2PQP2;A0A1W2PQ77;A0A1W2PRE6;A0A1W2PQ06;A0A1W2PQE0;A0A1W2PNV3;A0A1W2PRD0;A0A1W2PQ38;A0A1W2PQS3;A0A1W2PQQ4;A0A1W2PQ12;A0A1W2PP28	A0A1W2PPG5;A0A1W2PPP5;A0A1W2PPG1;A0A1W2PQM3;A0A1W2PS81;E7EQ34;I3NI02;O14653;O14653-2;A0A1W2PRV0;O14653-3;A0A1W2PR23;A0A1W2PPJ0;A0A1W2PPW8;A0A1W2PR02;A0A1W2PRP7;I3L0K1;I3L4Z6;A0A1W2PRC2;I3L1K7;A0A1W2PS12;A0A1X7SBU8;A0A1W2PRL0;A0A1W2PQP2;A0A1W2PQ77;A0A1W2PRE6;A0A1W2PQ06;A0A1W2PQE0;A0A1W2PNV3;A0A1W2PRD0;A0A1W2PQ38	Golgi SNAP receptor complex member 2	GOSR2
5.259	4.25322	O15269;O15269-2	O15269	Serine palmitoyltransferase 1	SPTLC1
5.259	4.47786	Q9NV31	Q9NV31	U3 small nucleolar ribonucleoprotein protein IMP3	IMP3
5.258	4.91948	O15305;H3BV55;H3BPH4;H3BRM0;O15305-2;H3BR08;H3BM92;H3BV34;H3BT06;H3BNY9	O15305;H3BV55;H3BPH4;H3BRM0	Phosphomannomutase 2;Phosphomannomutase	PMM2
5.258	4.16403	A0A087WUD3;Q9NRP0;Q9NRP0-2	A0A087WUD3;Q9NRP0;Q9NRP0-2	Oligosaccharyltransferase complex subunit OSTC	OSTC
5.257	4.29277	Q9BW19;A2AB20;A0A140T9E6;A0A087X1W5	Q9BW19	Kinesin-like protein KIFC1	KIFC1
5.257	4.2774	Q9UMS0-3;Q9UMS0;Q9UMS0-2;C9J8Q1;F8W9P7;H7C537	Q9UMS0-3;Q9UMS0;Q9UMS0-2	NFU1 iron-sulfur cluster scaffold homolog, mitochondrial	NFU1
5.257	4.37392	P49902;P49902-2;Q5JUV4;Q5JUV3;Q5JUV6;H0YHR8;S4R3E7;S4R3A6;REV__M0QX83;REV__H0YES7;REV__F5GWJ3;REV__Q17RW3;REV__A0A1B0GW38	P49902;P49902-2;Q5JUV4	Cytosolic purine 5-nucleotidase	NT5C2
5.257	5.23466	G3V0I5;P49821-2;P49821;B4DE93;E9PQP1;E9PMX3;E9PLC6;E9PPR0;E9PPS5;E9PJL9;H0YE81;E9PPD6	G3V0I5;P49821-2;P49821;B4DE93	NADH dehydrogenase [ubiquinone] flavoprotein 1, mitochondrial	NDUFV1
5.256	4.22054	O15116;E5RJ47;E5RH18	O15116	U6 snRNA-associated Sm-like protein LSm1	LSM1
5.256	5.02018	Q86UP2;Q86UP2-4;Q86UP2-2;Q86UP2-3;G3V4Y7;B7Z6P3;H0YJZ8;G3V5G2;G3V5P0;H0YJP2;H0YJV5	Q86UP2;Q86UP2-4;Q86UP2-2;Q86UP2-3	Kinectin	KTN1
5.255	3.24477	P39880-3;P39880;P39880-2;P39880-4;P39880-5;P39880-6	P39880-3;P39880;P39880-2;P39880-4;P39880-5;P39880-6	Homeobox protein cut-like 1	CUX1
5.255	4.72225	Q96MX6;Q96MX6-2;Q8ND98;H7C389	Q96MX6;Q96MX6-2;Q8ND98	WD repeat-containing protein 92	WDR92;DKFZp434B156
5.254	4.79573	Q9BXW7-2;Q9BXW7;A8MYZ9	Q9BXW7-2;Q9BXW7	Cat eye syndrome critical region protein 5	CECR5
5.254	4.6478	Q02338;E9PCG9;C9K0G7;H7C2W1;C9JM78;C9JQ90;A0A0G2JRX6;C9JEB9	Q02338;E9PCG9;C9K0G7	D-beta-hydroxybutyrate dehydrogenase, mitochondrial	BDH1
5.254	4.38403	Q969M3;Q969M3-3;E5RGR9;E5RHH4;Q969M3-2	Q969M3;Q969M3-3	Protein YIPF5	YIPF5
5.253	5.08864	Q16401;Q16401-2;F2Z3J2;Q4VXH0	Q16401;Q16401-2	26S proteasome non-ATPase regulatory subunit 5	PSMD5
5.253	4.50899	Q9UJA5;Q9UJA5-2;Q9UJA5-3;Q9UJA5-4	Q9UJA5;Q9UJA5-2;Q9UJA5-3;Q9UJA5-4	tRNA (adenine(58)-N(1))-methyltransferase non-catalytic subunit TRM6	TRMT6
5.253	4.64735	P82932	P82932	28S ribosomal protein S6, mitochondrial	MRPS6
5.253	4.92525	P04440;H0Y7G7;A0A140T9P1;A0A140T976;H0Y5P2;A0A140T9Y0;A0A140T9I3;A0A0G2JII1;A0A140T8Z3	P04440;H0Y7G7;A0A140T9P1;A0A140T976;H0Y5P2;A0A140T9Y0;A0A140T9I3;A0A0G2JII1	HLA class II histocompatibility antigen, DP beta 1 chain	HLA-DPB1
5.252	3.16203	Q5T6F2;Q5T6F2-2;Q5JV08;H0YDN2	Q5T6F2	Ubiquitin-associated protein 2	UBAP2
5.252	5.1235	P56211;H3BMD8;P56211-2;H3BQ52;H3BTD3	P56211;H3BMD8;P56211-2;H3BQ52	cAMP-regulated phosphoprotein 19	ARPP19
5.252	4.69853	Q9P2I0;H0YJF4;G3V3T7;G3V5T3	Q9P2I0	Cleavage and polyadenylation specificity factor subunit 2	CPSF2
5.252	4.55582	Q96EL3;B9A051	Q96EL3	39S ribosomal protein L53, mitochondrial	MRPL53
5.252	5.22399	Q92619;K7ES98;K7EM85;Q92619-2;K7EQA4	Q92619;K7ES98;K7EM85;Q92619-2	Minor histocompatibility protein HA-1;Minor histocompatibility antigen HA-1	HMHA1
5.251	4.49879	Q15554;H3BR06;U3KQ35;Q15554-4;H3BTA7;J3KSZ6;J3KSJ9;H3BR37;V9GYM1	Q15554;H3BR06	Telomeric repeat-binding factor 2	TERF2
5.251	4.81734	E7EX90;Q14203-3;Q14203-4;Q14203-6;Q14203;Q14203-5;Q14203-2;Q6AWB1;E7EWF7;C9JJD0;C9JZA4;C9JTE5;C9JJN7;C9JKG6;E9PCY0;C9J1B7;C9JUI8	E7EX90;Q14203-3;Q14203-4;Q14203-6;Q14203;Q14203-5;Q14203-2;Q6AWB1	Dynactin subunit 1	DCTN1;DKFZp686E0752
5.251	5.40334	B0I1T2;B0I1T2-4;B0I1T2-3;F8WEW9;B0I1T2-2;F8WAS7	B0I1T2;B0I1T2-4	Unconventional myosin-Ig;Minor histocompatibility antigen HA-2	MYO1G
5.25	5.52583	P19367;P19367-4;P19367-2;P19367-3;B1AR63;Q2TB90;B1AR62;B1AR61;Q2TB90-2;Q2TB90-3	P19367;P19367-4;P19367-2;P19367-3	Hexokinase-1	HK1
5.25	4.91201	P51991-2	P51991-2	Heterogeneous nuclear ribonucleoprotein A3	HNRNPA3
5.25	4.22786	Q9Y2S7;B4DEM9	Q9Y2S7;B4DEM9	Polymerase delta-interacting protein 2	POLDIP2
5.25	4.72761	Q8WUM0	Q8WUM0	Nuclear pore complex protein Nup133	NUP133
5.25	3.32756	Q9H2P9;Q9H2P9-5;Q9H2P9-6;Q9H2P9-4;Q9H2P9-3;Q9H2P9-2	Q9H2P9;Q9H2P9-5;Q9H2P9-6;Q9H2P9-4;Q9H2P9-3;Q9H2P9-2	Diphthine synthase	DPH5
5.249	4.79216	A9Z1X7;Q8IYB3;Q8IYB3-2;E9PCT1;M0QXG5;M0R1E7	A9Z1X7;Q8IYB3;Q8IYB3-2;E9PCT1	Serine/arginine repetitive matrix protein 1	SRRM1
5.247	NaN	Q86V88;Q86V88-3;Q86V88-2	Q86V88;Q86V88-3;Q86V88-2	Magnesium-dependent phosphatase 1	MDP1
5.247	3.81971	J3KPT4;Q9H4I3;Q9H4I3-2	J3KPT4;Q9H4I3;Q9H4I3-2	TraB domain-containing protein	TRABD
5.247	5.16972	Q9BXS5;Q9BXS5-2;E7ENJ6;K7EJL1;K7EQX3;K7ENA7;K7EPJ8;K7ER75;A0A087WZX7;Q9Y6Q5;Q9Y6Q5-2;K7EQ90;K7EJJ1;K7EPR4;K7EK69;K7ERH5;K7EL08;K7EMG5	Q9BXS5;Q9BXS5-2;E7ENJ6;K7EJL1	AP-1 complex subunit mu-1	AP1M1
5.247	4.86887	C9J2Y9;P30876;A0A1W2PPT5;C9JMN3;C9JZW8	C9J2Y9;P30876;A0A1W2PPT5	DNA-directed RNA polymerase;DNA-directed RNA polymerase II subunit RPB2	POLR2B
5.246	NaN	P63146;H0Y9V2;H0YA80	P63146;H0Y9V2;H0YA80	Ubiquitin-conjugating enzyme E2 B	UBE2B
5.246	5.17787	P53007;B4DP62	P53007;B4DP62	Tricarboxylate transport protein, mitochondrial	SLC25A1
5.246	4.26222	Q9NY61;A0A087WWS8;A0A087WTH8;A0A087WW41	Q9NY61	Protein AATF	AATF
5.243	4.76949	Q8IXM3	Q8IXM3	39S ribosomal protein L41, mitochondrial	MRPL41
5.243	NaN	Q01650;A0A0C4DGL4;H0YJ95;G3V4Z6;Q9UM01	Q01650	Large neutral amino acids transporter small subunit 1	SLC7A5
5.243	4.65776	Q8IZ07;H0YIN8;S4R3D2;F8W150;S4R3U2;Q6ZTN6-2	Q8IZ07;H0YIN8	Ankyrin repeat domain-containing protein 13A	ANKRD13A
5.242	3.39043	Q92990;Q92990-2;M0QXG8;M0QX84;REV__E9PL24;REV__Q5VU43-2;REV__A0A0C4DFQ0	Q92990;Q92990-2;M0QXG8	Glomulin	GLMN
5.242	4.98826	Q9BUQ8;H0YI52;H0YIL9;F8VVA2;F8W1J5;Q9BUQ8-2	Q9BUQ8	Probable ATP-dependent RNA helicase DDX23	DDX23
5.242	5.13306	Q6QNY1;J3QRU7;Q6QNY1-2;A0A087X1N6	Q6QNY1;J3QRU7;Q6QNY1-2;A0A087X1N6	Biogenesis of lysosome-related organelles complex 1 subunit 2	BLOC1S2
5.242	4.65734	Q06124;Q06124-2;Q06124-3;A0A1W2PPU4;A0A0U1RRI0;H0YF12	Q06124;Q06124-2;Q06124-3	Tyrosine-protein phosphatase non-receptor type 11	PTPN11 /SHP-2	+
5.242	4.40686	Q14318-2;M0R2K9;M0R2Q6;M0R1Q0;M0R1S6	Q14318-2	Peptidyl-prolyl cis-trans isomerase FKBP8	FKBP8
5.241	4.03386	Q96GK7;C9JGM0	Q96GK7	Fumarylacetoacetate hydrolase domain-containing protein 2A	FAHD2A
5.241	5.20258	Q9HDC9;H0Y512;Q9HDC9-2	Q9HDC9;H0Y512;Q9HDC9-2	Adipocyte plasma membrane-associated protein	APMAP
5.241	5.13176	Q14254;J3QLD9;E7EMK3	Q14254;J3QLD9;E7EMK3	Flotillin-2	FLOT2
5.241	4.4352	Q9NQ50	Q9NQ50	39S ribosomal protein L40, mitochondrial	MRPL40
5.241	2.75328	P52732	P52732	Kinesin-like protein KIF11	KIF11
5.24	NaN	Q8IUI8-2	Q8IUI8-2	Cytokine receptor-like factor 3	CRLF3
5.239	4.24483	Q96IJ6;Q96IJ6-2;A0A087WUI8;F8WD54;C9JAH0;A0A0U1RRC2;C9J255	Q96IJ6;Q96IJ6-2;A0A087WUI8	Mannose-1-phosphate guanyltransferase alpha	GMPPA
5.239	4.88983	Q9BPW8;H7C2U6;C9JDV8;F8WCR5	Q9BPW8;H7C2U6	Protein NipSnap homolog 1	NIPSNAP1
5.239	4.75197	Q09161;X6R941;F2Z2T1	Q09161	Nuclear cap-binding protein subunit 1	NCBP1
5.239	4.9196	Q9H2W6;A0A087WT90;A0A087WT51;H0YN64	Q9H2W6	39S ribosomal protein L46, mitochondrial	MRPL46
5.239	3.86225	O75190;A0A0J9YX62;O75190-3;E9PH18;C9J2C4;O75190-2;C9JDX6;F8WCZ4;C9J2P2;O75190-4;C9JDR7;C9JB42;C9JN01;Q8WWF6;Q7Z6W7;Q8NHS0	O75190;A0A0J9YX62;O75190-3;E9PH18;C9J2C4;O75190-2;C9JDX6;F8WCZ4;C9J2P2;O75190-4;C9JDR7	DnaJ homolog subfamily B member 6	DNAJB6
5.238	NaN	Q9HBM1;C9JW94	Q9HBM1;C9JW94	Kinetochore protein Spc25	SPC25
5.238	4.77256	O43395;O43395-3	O43395	U4/U6 small nuclear ribonucleoprotein Prp3	PRPF3
5.238	3.74007	P57076;H7BZW1;D3DSE6;C9J818;F8VZ95;H7C2R6;C9JX57;H7C3D9;Q9NX33	P57076;H7BZW1;D3DSE6;C9J818;F8VZ95;H7C2R6	UPF0769 protein C21orf59	C21orf59
5.237	4.12814	C9JG97;C9JEH3;Q13685;C9JTS3;H7C0R2	C9JG97;C9JEH3;Q13685;C9JTS3	Angio-associated migratory cell protein	AAMP
5.236	4.68033	O75844	O75844	CAAX prenyl protease 1 homolog	ZMPSTE24
5.236	4.48249	Q96NC0;R4GNG8;R4GMX9	Q96NC0;R4GNG8	Zinc finger matrin-type protein 2	ZMAT2
5.236	4.90252	P36873;P36873-2;F8VYE8;F8W0W8;F8VR82;A0A087WYY5;F8W0V8;F8WE71;H0Y3Y6;F8W1A0	P36873;P36873-2;F8VYE8;F8W0W8;F8VR82	Serine/threonine-protein phosphatase PP1-gamma catalytic subunit;Serine/threonine-protein phosphatase	PPP1CC
5.235	5.20307	H0YNG3;P67812-4;P67812;P67812-3;H0YNX5;P67812-2;H0YNA5;H0YKT4;P0C7V7	H0YNG3;P67812-4;P67812;P67812-3;H0YNX5;P67812-2;H0YNA5	Signal peptidase complex catalytic subunit SEC11;Signal peptidase complex catalytic subunit SEC11A;Signal peptidase I	SEC11A
5.234	4.69504	Q96EY8;S4R3P5;F5H4Z7;A0A087X114;S4R3Z1;F5H079	Q96EY8;S4R3P5;F5H4Z7	Cob(I)yrinic acid a,c-diamide adenosyltransferase, mitochondrial	MMAB
5.234	4.29711	P06132;A0A1B0GVN9;A0A1B0GVZ4;H0Y5R6;Q5T446	P06132;A0A1B0GVN9;A0A1B0GVZ4;H0Y5R6	Uroporphyrinogen decarboxylase	UROD
5.234	4.52858	Q9BW27;J3KT10;Q9BW27-3;J3QL54;Q9BW27-2;F5H0W7;J3QLH0;J3KRC0;J3KSH3;J3QLD4;J3QLV0;J3KS87;J3QL91;J3QS63	Q9BW27;J3KT10;Q9BW27-3;J3QL54;Q9BW27-2	Nuclear pore complex protein Nup85	NUP85
5.234	4.3648	Q49A26;Q49A26-3;Q49A26-2;K7EMM8;Q49A26-4;K7EPU6;K7ELL0	Q49A26;Q49A26-3;Q49A26-2;K7EMM8;Q49A26-4	Putative oxidoreductase GLYR1	GLYR1
5.233	4.7555	Q92572;F5H459	Q92572;F5H459	AP-3 complex subunit sigma-1	AP3S1
5.233	NaN	P30481;P30485;P30461;A0A140T9H3;A0A140T9A9;A0A140T9Y5;A0A140T997;P03989;A0A140TA14;A0A140TA11	P30481;P30485;P30461;A0A140T9H3;A0A140T9A9;A0A140T9Y5;A0A140T997;P03989;A0A140TA14;A0A140TA11	HLA class I histocompatibility antigen, B-44 alpha chain;HLA class I histocompatibility antigen, B-47 alpha chain;HLA class I histocompatibility antigen, B-13 alpha chain;HLA class I histocompatibility antigen, B-27 alpha chain	HLA-B
5.232	4.64293	Q15436;F5H365;Q15436-2;G3V2R6;G3V3G5;G3V4V1;G3V1W4;G3V5X8;G3V4Q2;G3V5K1	Q15436;F5H365;Q15436-2	Protein transport protein Sec23A	SEC23A
5.232	4.91841	Q2TAM5;A0A087X0W8;Q04206;E9PKH5;Q04206-2;Q04206-3;Q04206-4;E9PKV4;A0A087WVP0;E9PI38;E9PQS6;E9PMD5;E9PRX2;E9PNV4;E9PJR1;E9PM47;H0YCB4;E9PNK5;E9PN69;E9PJZ9	Q2TAM5;A0A087X0W8;Q04206;E9PKH5;Q04206-2;Q04206-3;Q04206-4;E9PKV4;A0A087WVP0;E9PI38;E9PQS6	Transcription factor p65	RELA
5.232	4.61543	A0A0X1KG71;Q8WX92	A0A0X1KG71;Q8WX92	Negative elongation factor B	NELFB
5.232	5.21359	E7EPT4;P19404	E7EPT4;P19404	NADH dehydrogenase [ubiquinone] flavoprotein 2, mitochondrial	NDUFV2
5.231	3.94145	Q8TD16;Q8TD16-2	Q8TD16;Q8TD16-2	Protein bicaudal D homolog 2	BICD2
5.23	4.63473	Q69YN2;Q69YN2-3;X6R7M0;Q69YN2-2	Q69YN2;Q69YN2-3	CWF19-like protein 1	CWF19L1
5.23	5.20917	P13861-2;P13861;H7C330;C9J830;H7C4A9	P13861-2;P13861	cAMP-dependent protein kinase type II-alpha regulatory subunit	PRKAR2A
5.23	4.55769	Q9Y2P8;Q5VZU3;Q9Y2P8-2;Q5VZU2;Q5VYW8	Q9Y2P8;Q5VZU3	RNA 3-terminal phosphate cyclase-like protein	RCL1
5.229	4.65692	Q9Y2T2;H0YBM0	Q9Y2T2	AP-3 complex subunit mu-1	AP3M1
5.229	NaN	O14757;J3KN87;E7EPP6;O14757-2;O14757-3;E9PPA5;A0A087WY91;E9PJI4;E9PKQ3;A0A087WT52;E9PQW7;E9PM65	O14757;J3KN87;E7EPP6;O14757-2;O14757-3	Serine/threonine-protein kinase Chk1	CHEK1
5.229	4.93133	Q9Y3A6;B1AKT3;Q9Y3A6-2;M0R072	Q9Y3A6;B1AKT3;Q9Y3A6-2	Transmembrane emp24 domain-containing protein 5	TMED5
5.229	4.33203	Q5H9R7-6;Q5H9R7-4;Q5H9R7-3;H0YEN2	Q5H9R7-6;Q5H9R7-4;Q5H9R7-3;H0YEN2	Serine/threonine-protein phosphatase 6 regulatory subunit 3	PPP6R3
5.229	4.1258	Q96MW1;Q86WV7;Q96MW1-2;K7ER24	Q96MW1;Q86WV7;Q96MW1-2	Coiled-coil domain-containing protein 43	CCDC43
5.229	5.03468	Q8NCW5;Q8NCW5-2;Q5T3I4;Q5T3I3	Q8NCW5;Q8NCW5-2;Q5T3I4	NAD(P)H-hydrate epimerase	APOA1BP
5.228	NaN	P27449	P27449	V-type proton ATPase 16 kDa proteolipid subunit	ATP6V0C
5.227	4.41917	A5YKK6;A5YKK6-4;H3BVC9;H3BNB1;H3BTH2;H3BMH0;H3BU44;H3BR89;H3BT18;H3BPF1	A5YKK6;A5YKK6-4	CCR4-NOT transcription complex subunit 1	CNOT1
5.227	4.54659	Q14137;Q14137-2;A0A075B729	Q14137;Q14137-2	Ribosome biogenesis protein BOP1	BOP1
5.226	NaN	B7ZKQ9;Q8WTV0-2;Q8WTV0-4;Q8WTV0-5;Q8WTV0;F5H4X0;Q8WTV0-3;F5H5E8	B7ZKQ9;Q8WTV0-2;Q8WTV0-4;Q8WTV0-5;Q8WTV0;F5H4X0;Q8WTV0-3	Scavenger receptor class B member 1	SCARB1
5.226	3.40085	Q92995;Q92995-2;H7C5J3;H7C502	Q92995;Q92995-2	Ubiquitin carboxyl-terminal hydrolase 13	USP13
5.224	3.7649	Q9UBV2;Q9UBV2-2;G3V3B3	Q9UBV2	Protein sel-1 homolog 1	SEL1L
[truncated: 6,087 more rows]
