# Supplementary material for: Quantitative proteomics identifies PTP1B as modulator of B cell antigen receptor signaling
Source: Life Sci Alliance. 2021 Sep 15;4(11):e202101084. doi: 10.26508/lsa.202101084 (PMC8473724; doi:10.26508/lsa.202101084)
Supplement: Supplementary file 8 [file LSA-2021-01084_TableS8.xlsx]

## Sheet: Information
	Quantitative Proteomics Identifies PTP1B as Modulator of B Cell Antigen Receptor Signaling
	Jennifer J. Schwarz, Lorenz Grundmann, Thomas Kokot, Kathrin Kläsener, Sandra Fotteler, David Medgyesi, Maja Köhn, Michael Reth, Bettina Warscheid
Supplemental Table 8	SILAC-based quantitative proteome analysis of PTP1B knockout cells vs. Ramos B cells
Protein IDs	Identifiers of the proteins contained in the protein group, sorted by number of identified peptides in descending order
Majority protein IDs	These are the IDs of those proteins that have at least half of the peptides that the leading protein has
Protein names	Names of all proteins in this group
Gene names	Gene names belonging to the proteins in this group
significant hit	Indicates with a "+" that the protein has a significant p-value (greater than or equal to 0.05) and has a heavy to light ratio of ≥2 or ≤0.5
t-test Significant	Indicates with a "+" that the protein has a significant p-value (greater than or equal to 0.05)
Mean LOG2 Ratio WT/KO	Mean of the log2 transformed normalized SILAC ratios
- LOG10 p-value WT/KO	negative log10 transformed p-value of the t-test
Peptides	Number of identified peptides
Razor + unique peptides	Number of razor and unique peptides
Unique peptides	Number of unique peptides
Sequence coverage [%]	Protein sequence coverage in %
Mol. weight [kDa]	Molecular weight in kDa
Score	Score of the database search
Ratio H/L normalized Replicate 1	Normalized heavy to light ratio in replicate 1
Ratio H/L normalized Replicate 2	Normalized heavy to light ratio in replicate 2
Ratio H/L normalized Replicate 3	Normalized heavy to light ratio in replicate 3
Ratio H/L normalized Replicate 4	Normalized heavy to light ratio in replicate 4

## Sheet: Ramos KO PTP1B vs. WT
Protein IDs	Majority protein IDs	Protein names	Gene names	significant hit	t-test Significant	Mean LOG2 Ratio WT/KO	- LOG10 p-value WT/KO	Peptides	Razor + unique peptides	Unique peptides	Sequence coverage [%]	Mol. weight [kDa]	Score	Ratio H/L normalized Replicate 1	Ratio H/L normalized Replicate 2	Ratio H/L normalized Replicate 3	Ratio H/L normalized Replicate 4
P32942;K7ERN2;K7EP52;K7ERF0;K7EQC7	P32942;K7ERN2	Intercellular adhesion molecule 3	ICAM3	+	+	3.80871	3.15749	7	7	7	15	59.54	29.207	3.6269	3.15496	4.17025	4.28273
P18031;B4DSN5	P18031;B4DSN5	Tyrosine-protein phosphatase non-receptor type 1;Tyrosine-protein phosphatase non-receptor type	PTPN1 / PTP1B	+	+	3.41562	2.24811	21	21	21	58.4	49.966	299.36	2.57029	4.74669	2.90908	3.43642
Q8WWH4-2;Q8WWH4	Q8WWH4-2;Q8WWH4	Ankyrin repeat, SAM and basic leucine zipper domain-containing protein 1	ASZ1			2.50706	1.23869	2	2	2	7.7	52.431	41.819	1.95831	1.79934	NaN	3.76354
A0A0A0MRM8;Q9UM54-6;E7EW20;Q9UM54-5;Q9UM54-2;Q9UM54-4;Q9UM54-1;Q9UM54;A0A0D9SGC1;Q5JVM0	A0A0A0MRM8;Q9UM54-6;E7EW20;Q9UM54-5;Q9UM54-2;Q9UM54-4;Q9UM54-1;Q9UM54;A0A0D9SGC1	Unconventional myosin-VI	MYO6	+	+	2.39941	1.38074	65	65	65	57.7	145.01	323.31	1.16654	1.22682	3.38653	3.81774
Q8NFX7-2;Q8NFX7;F8VZZ2;Q8NFX7-3	Q8NFX7-2;Q8NFX7	Syntaxin-binding protein 6	STXBP6			2.25903	0.606026	13	13	13	56.2	23.587	323.31	-0.540325	-0.406159	5.09322	4.8894
E9PC15;Q53H12;E9PG39;A0A0G2JLG5;A0A0G2JLD0	E9PC15;Q53H12;E9PG39	Acylglycerol kinase, mitochondrial	AGK	+	+	1.9187	2.01527	10	10	10	30.2	43.796	52.403	2.2091	2.69635	1.34324	1.42612
P01040;C9J0E4	P01040;C9J0E4	Cystatin-A;Cystatin-A, N-terminally processed	CSTA			1.89358	0.589487	9	9	9	84.7	11.006	139.71	-0.337882	-0.414384	5.02928	3.29732
P00488;Q9NQP5;A6PVK5	P00488;Q9NQP5;A6PVK5	Coagulation factor XIII A chain	F13A1			1.70798	0.204146	2	2	2	3.6	83.266	5.475	5.50747	NaN	-4.18018	3.79664
Q00796;H0YLA4;H0YKB3;Q00796-2	Q00796;H0YLA4	Sorbitol dehydrogenase	SORD			1.65364	0.837946	13	13	13	49.6	38.324	74.572	0.388771	0.267955	2.1036	3.85423
P52895;B4DK69;A0A0A0MSD5;S4R3P0;P52895-2	P52895;B4DK69;A0A0A0MSD5;S4R3P0	Aldo-keto reductase family 1 member C2	AKR1C2			1.6314	0.405851	18	4	4	67.5	36.735	54.789	-1.18948	-1.10861	5.21389	3.6098
Q13642-1;Q13642-5;Q13642-4;Q5JXI8;A0A0D9SFZ9;Q5JXH8;Q5JXH7;Q5JXI3;Q5JXI2;Q13642-3;Q13642;A0A0D9SFI6;A0A0D9SFB0;Q5JXH9;A0A0D9SG53;A0A0D9SGB2;Q5JXI0;A0A0D9SGD1;A0A0D9SEY7;A0A0D9SGC5	Q13642-1;Q13642-5;Q13642-4;Q5JXI8;A0A0D9SFZ9;Q5JXH8;Q5JXH7;Q5JXI3;Q5JXI2;Q13642-3;Q13642;A0A0D9SFI6;A0A0D9SFB0;Q5JXH9;A0A0D9SG53;A0A0D9SGB2;Q5JXI0	Four and a half LIM domains protein 1	FHL1			1.56115	0.694363	12	12	12	42.9	31.895	91.208	0.0965451	3.90997	-0.103658	2.34176
P80723;P80723-2;U3KQP0	P80723;P80723-2	Brain acid soluble protein 1	BASP1	+	+	1.47516	1.99164	11	11	11	75.8	22.693	226.82	1.5473	0.797096	1.52567	2.03056
Q9GZX7-2;Q9GZX7;H0YGF6;H0YFL3	Q9GZX7-2;Q9GZX7;H0YGF6	Single-stranded DNA cytosine deaminase	AICDA			1.44466	0.649969	5	5	5	22.9	22.614	15.307	-0.275961	0.210638	1.95412	3.88982
A0A0A0MSS8;P42330;S4R3Z2;P42330-2;S4R3D5	A0A0A0MSS8;P42330;S4R3Z2;P42330-2	Aldo-keto reductase family 1 member C3	AKR1C3			1.41073	0.442644	15	9	9	65	36.867	60.253	-0.691891	-0.778284	2.50358	4.6095
O60716-2;O60716;C9JZR2;O60716-5;O60716-3;O60716-10;O60716-9;O60716-18;O60716-17;O60716-13;O60716-11;O60716-6;O60716-4;O60716-21;O60716-19;O60716-8;O60716-7;O60716-14;O60716-12;O60716-26;O60716-25;O60716-22;O60716-20;O60716-16;O60716-15;O60716-29;O60716-27;O60716-24;O60716-23;O60716-30;O60716-28;O60716-32;O60716-31;E9PKY0;H0YC95;E9PRE2;E9PKL1	O60716-2;O60716;C9JZR2;O60716-5;O60716-3;O60716-10;O60716-9;O60716-18;O60716-17;O60716-13;O60716-11;O60716-6;O60716-4;O60716-21;O60716-19;O60716-8;O60716-7;O60716-14;O60716-12;O60716-26;O60716-25;O60716-22;O60716-20;O60716-16;O60716-15;O60716-29;O60716-27;O60716-24;O60716-23;O60716-30;O60716-28;O60716-32;O60716-31	Catenin delta-1	CTNND1			1.38039	0.639009	34	34	34	45.2	107.35	253.74	-0.219215	-0.19856	3.01564	2.92369
O60831;A6NP52	O60831	PRA1 family protein 2	PRAF2			1.31596	0.504955	5	5	2	30.3	19.258	9.7213	2.83085	3.53207	-0.610565	-0.488515
P50416;P50416-2;H3BMD2;H3BP22;H3BUV7;H3BUJ0	P50416;P50416-2	Carnitine O-palmitoyltransferase 1, liver isoform	CPT1A			1.25941	0.630097	21	21	21	31.3	88.367	124.12	0.00736199	-0.402283	2.53653	2.89604
S4R418;A0A0A0MT10;A0A087X188;Q9UBW5-2;Q9UBW5;F5H0W4;S4R3J0	S4R418;A0A0A0MT10;A0A087X188;Q9UBW5-2;Q9UBW5;F5H0W4	Bridging integrator 2	BIN2	+	+	1.25367	3.22863	5	5	5	11	58.913	8.9704	1.31387	1.21524	NaN	1.23189
P35749;P35749-2;B1PS43;P35749-4;P35749-3	P35749;P35749-2;B1PS43;P35749-4;P35749-3	Myosin-11	MYH11			1.23287	1.00913	55	31	31	29.9	227.34	152.84	0.451938	0.611172	1.14385	2.72452
X5D289;Q9NPH0;V9GZ71;Q9NPH0-2;A0A0A0MS36;A0A087WYU6;A0A087WW36;A0A087WWB7	X5D289;Q9NPH0;V9GZ71;Q9NPH0-2;A0A0A0MS36	Lysophosphatidic acid phosphatase type 6	ACP6			1.2327	0.845186	15	15	15	48.1	48.886	101.03	0.0789293	0.226262	2.31933	2.30629
Q6ZTQ3-2;Q6ZTQ3;Q6ZTQ3-4;Q6ZTQ3-3	Q6ZTQ3-2;Q6ZTQ3;Q6ZTQ3-4;Q6ZTQ3-3	Ras association domain-containing protein 6	RASSF6			1.20801	0.53935	14	14	14	50.1	39.803	101.62	-0.444773	-0.383887	2.64934	3.01136
A0A0A0MT30;Q04828;H0Y804;A6NHU4	A0A0A0MT30;Q04828;H0Y804;A6NHU4	Aldo-keto reductase family 1 member C1	AKR1C1			1.18651	0.304301	18	18	1	64.2	37.115	202.83	-0.79776	-0.751732	0.603787	5.69175
P52333;P52333-2;P52333-4	P52333;P52333-2;P52333-4	Tyrosine-protein kinase JAK3	JAK3			1.18224	0.68557	18	18	18	24.3	125.1	87.976	-0.0426443	-0.131013	2.30445	2.59815
Q8IV36-2;Q8IV36;Q8IV36-3;J3KSF1;E9PIM7	Q8IV36-2;Q8IV36;Q8IV36-3	Protein HID1	HID1			1.09276	1.00696	4	4	4	5.3	88.615	5.4012	0.961058	0.52667	NaN	1.79056
P49590-2;P49590;B4DQ67;D6RJE6;D6RB22	P49590-2;P49590;B4DQ67	Probable histidine--tRNA ligase, mitochondrial	HARS2	+	+	1.02018	1.60778	22	15	15	46.6	54.114	40.41	0.620202	0.713784	1.69394	1.05278
O94832;J3QRN6;K7EIG7;J3KRL0;J3QRR2	O94832;J3QRN6;K7EIG7	Unconventional myosin-Id	MYO1D			0.992197	0.601478	53	50	50	55.9	116.2	288.05	0.102295	0.266877	3.06967	0.529947
Q9P2F8-2;Q9P2F8	Q9P2F8-2;Q9P2F8	Signal-induced proliferation-associated 1-like protein 2	SIPA1L2			0.958517	0.384471	2	2	2	4	84.536	1.8635	0.479553	-0.365314	NaN	2.76131
Q8IWB7;C9JJ54	Q8IWB7;C9JJ54	WD repeat and FYVE domain-containing protein 1	WDFY1			0.939158	0.333705	7	7	6	25.9	46.323	18.322	-0.16092	-0.0503979	NaN	3.02879
Q02818;H7BZI1	Q02818;H7BZI1	Nucleobindin-1	NUCB1			0.923338	0.599152	27	27	15	58.6	53.879	246.2	-0.131326	-0.278076	2.05506	2.0477
P27105;F8VSL7;P27105-2	P27105	Erythrocyte band 7 integral membrane protein	STOM			0.91519	0.665852	8	8	8	41.7	31.73	47.532	0.0349583	-0.223778	1.91716	1.93242
P54922;C9JZW7	P54922	[Protein ADP-ribosylarginine] hydrolase	ADPRH			0.911232	1.22285	7	7	7	28.3	39.506	28.244	0.548733	0.254352	1.59397	1.24787
P12235;V9GYG0	P12235;V9GYG0	ADP/ATP translocase 1	SLC25A4		+	0.908534	2.92478	22	6	6	63.8	33.064	15.644	0.823013	0.792106	0.896775	1.12224
P54652	P54652	Heat shock-related 70 kDa protein 2	HSPA2			0.904523	0.732192	24	8	8	38.2	70.02	23.389	-0.0540844	0.0513026	1.63951	1.98137
Q8N8J7	Q8N8J7	Uncharacterized protein C4orf32	C4orf32			0.898422	0.728919	3	3	3	31.8	14.652	10.305	-0.13606	0.138421	1.9863	1.60502
P0DJD4;J3KQ82;J3KPK3;P0DJD3-3;Q15415-2;P0DJD3-2;P0C7P1-2;Q15415;P0DJD3;P0C7P1;A6NEQ0;A6NDE4	P0DJD4;J3KQ82;J3KPK3;P0DJD3-3;Q15415-2;P0DJD3-2;P0C7P1-2;Q15415;P0DJD3;P0C7P1;A6NEQ0;A6NDE4	RNA-binding motif protein, Y chromosome, family 1 member C;RNA-binding motif protein, Y chromosome, family 1 member A1;RNA-binding motif protein, Y chromosome, family 1 member F/J;RNA-binding motif protein, Y chromosome, family 1 member D;RNA-binding motif protein, Y chromosome, family 1 member E;RNA-binding motif protein, Y chromosome, family 1 member B	RBMY1C;RBMY1J;RBMY1E;RBMY1A1;RBMY1F;RBMY1D;RBMY1B			0.883383	0.398628	2	2	2	5.2	55.783	2.172	-0.104873	NaN	2.5358	0.21922
O75131;A0A087WYQ3;E5RHZ0;H0YB26;A0A087WXR6;A0A087WUS8;E5RFT7;E7ENV7;Q86YQ8-2;Q9HCH3-2;Q8IYJ1;Q96A23;O95741;Q9UBL6-2;Q96A23-2;Q9HCH3;O95741-2;Q9UBL6	O75131;A0A087WYQ3	Copine-3	CPNE3			0.881481	0.742063	27	27	26	52.3	60.13	237.5	0.0103522	-0.00663718	1.78923	1.73298
C9J0J7;G5E9Q6;P35080-2;C9JQ45;C9J2N0	C9J0J7;G5E9Q6;P35080-2;C9JQ45	Profilin;Profilin-2	PFN2			0.880034	0.373543	5	5	2	65.9	9.8402	52.271	-0.361656	-0.320054	3.66528	0.536566
P19367;P19367-4;P19367-2;P19367-3;B1AR63;B1AR62;B1AR61	P19367;P19367-4;P19367-2;P19367-3	Hexokinase-1	HK1		+	0.871725	2.69146	48	48	39	54.7	102.48	258.91	1.02412	0.801241	0.662114	0.999423
P21291;E9PS42;E9PND2;E9PP21	P21291;E9PS42;E9PND2;E9PP21	Cysteine and glycine-rich protein 1	CSRP1			0.861856	0.986798	12	12	12	64.8	20.567	191.92	0.211615	0.226755	1.46053	1.54852
Q8NCL4;S4R3S5;S4R3A9;S4R345;S4R3M3	Q8NCL4;S4R3S5	Polypeptide N-acetylgalactosaminyltransferase 6	GALNT6			0.857121	1.16669	8	8	7	21.7	71.158	15.901	0.61341	0.102053	1.35123	1.36179
A0A087X1F5;A0A087WYV9;A0A087WUM0;P57105;A0A087WTA2	A0A087X1F5;A0A087WYV9;A0A087WUM0;P57105	Synaptojanin-2-binding protein	SYNJ2BP-COX16;SYNJ2BP			0.834784	0.431442	6	6	6	50.3	17.301	22.188	-0.119024	-0.163656	0.441059	3.18076
P16930;P16930-2;H0YLC7	P16930;P16930-2;H0YLC7	Fumarylacetoacetase	FAH			0.826544	0.949048	13	13	13	43.4	46.374	71.284	0.116426	0.253989	1.45649	1.47927
F8W9F9;H0Y7T5;Q9Y3S1-2;Q9Y3S1-4;Q9Y3S1;H0Y493;H0Y7R3;E9PCD1	F8W9F9;H0Y7T5;Q9Y3S1-2;Q9Y3S1-4;Q9Y3S1;H0Y493;H0Y7R3;E9PCD1	Serine/threonine-protein kinase WNK2	WNK2			0.814686	1.04011	15	11	1	8	234.38	19.515	0.367006	0.131326	1.29901	1.4614
Q96NB2;R4GMW0;A0A0C4DGR6;R4GMR9;R4GN74;R4GNC2;R4GN63;R4GMS6	Q96NB2;R4GMW0;A0A0C4DGR6;R4GMR9;R4GN74;R4GNC2;R4GN63	Sideroflexin-2	SFXN2		+	0.780682	1.77915	9	9	9	43.8	36.231	37.573	1.153	0.897628	0.399007	0.673095
A0A0G2JMH6;P01903;Q30118;A0A0G2JH46;A0A0G2JPN2;P01906	A0A0G2JMH6;P01903;Q30118;A0A0G2JH46	HLA class II histocompatibility antigen, DR alpha chain	HLA-DRA			0.775788	0.994709	10	10	10	39.4	28.621	44.238	0.547341	0.0319598	0.914871	1.60898
Q8TBP6	Q8TBP6	Solute carrier family 25 member 40	SLC25A40			0.768346	1.14814	14	14	14	53.3	38.124	40.11	1.26538	1.2017	0.111833	0.494475
Q9ULE6	Q9ULE6	Paladin	PALD1		+	0.766387	1.7904	36	36	36	52.1	96.753	237.1	0.619248	0.39605	1.02255	1.0277
O60880;O60880-4;O60880-3;O60880-6;O60880-2;O60880-5	O60880;O60880-4	SH2 domain-containing protein 1A	SH2D1A			0.766033	0.305609	6	6	6	64.8	14.187	55.009	-0.935158	-0.939012	2.71176	2.22654
Q9BY50;B4DI03;K7EJQ7;A0A0A0MR04	Q9BY50;B4DI03;K7EJQ7;A0A0A0MR04	Signal peptidase complex catalytic subunit SEC11C;Signal peptidase complex catalytic subunit SEC11	SEC11C;SEC11L3			0.763976	0.661541	10	10	10	47.9	21.542	56.846	0.0856191	-0.233787	1.74287	1.4612
P50579;P50579-3;F8VQZ7;P50579-2;F8VRR3;G3V1U3;F8VY03;F8VSC4;F8VZX9	P50579;P50579-3;F8VQZ7;P50579-2;F8VRR3;G3V1U3	Methionine aminopeptidase 2	METAP2			0.751841	0.643729	30	30	30	72.6	52.891	323.31	-0.241474	0.0467006	1.72548	1.47666
Q08499-6;A0A087WSZ7;Q08499-2;Q08499-10;Q08499-9;Q08499-11;Q08499;Q08499-3;Q08499-4;D6RHE0;Q08499-5;Q08499-8;Q08499-7;Q08499-12;K7EKV1;K7ENX7;O76104;Q32MM7;V9GYN0;Q08493-2;Q08493-3;Q08493	Q08499-6;A0A087WSZ7;Q08499-2;Q08499-10;Q08499-9;Q08499-11;Q08499;Q08499-3;Q08499-4;D6RHE0;Q08499-5;Q08499-8	cAMP-specific 3,5-cyclic phosphodiesterase 4D	PDE4D			0.747677	0.382375	20	20	18	32.9	84.427	110.61	-0.635244	-0.439481	1.36362	2.70181
P13761;A0A0G2JNX0;Q9TQE0;A0A0G2JP73;P79483;A0A0G2JNS5;A0A0G2JM55;Q30134;Q29974;P04229;A0A0G2JPR5	P13761;A0A0G2JNX0;Q9TQE0	HLA class II histocompatibility antigen, DRB1-7 beta chain;HLA class II histocompatibility antigen, DRB1-9 beta chain	HLA-DRB1			0.740686	1.08116	14	14	5	51.1	29.822	281.87	0.615508	0.00891703	0.964953	1.37336
Q14019;H3BT58	Q14019	Coactosin-like protein	COTL1		+	0.737545	2.83207	7	7	7	51.4	15.945	21.559	0.846298	0.81836	0.72779	0.557731
Q9HBE5	Q9HBE5	Interleukin-21 receptor	IL21R			0.733365	1.02408	6	6	6	10.6	59.129	5.2216	0.569479	-0.0568514	1.19837	1.22246
O43521-4;O43521-8;O43521-12;O43521;O43521-6;O43521-9;O43521-7;O43521-3;O43521-5;O43521-2;C9J417;O43521-11;O43521-10;O43521-14;O43521-19;E9PAM9;A0A0C4DH20;H7BZE5;A0A0A0MRE7;O43521-13;O43521-20;O43521-15;O43521-16;O43521-18;O43521-17	O43521-4;O43521-8;O43521-12;O43521;O43521-6;O43521-9;O43521-7;O43521-3;O43521-5;O43521-2;C9J417;O43521-11;O43521-10;O43521-14;O43521-19	Bcl-2-like protein 11	BCL2L11			0.732946	0.921235	4	4	4	30.8	18.535	17.706	0.401063	-0.0318429	1.07053	1.49204
B4E1G1;Q9BUN8-2;Q9BUN8;E5RGY0	B4E1G1;Q9BUN8-2;Q9BUN8;E5RGY0	Derlin-1	DERL1			0.712572	0.473886	5	5	5	31.8	17.033	7.2796	0.109343	-0.319568	0.55719	2.50332
Q53SF7-4;Q53SF7-2;A0A0D9SG04;Q53SF7-3;Q53SF7;A0A0B4J1Z0;H7C1G2;C9J8C4;C9JAU3;C9J5Y6;C9JWZ0;F8WEK0;Q53SF7-5	Q53SF7-4;Q53SF7-2;A0A0D9SG04;Q53SF7-3;Q53SF7	Cordon-bleu protein-like 1	COBLL1			0.696746	0.293848	40	40	37	47.6	123.87	271.92	-0.263756	-0.365221	3.48195	-0.0659859
Q96LC9;Q96LC9-2;Q96LC9-3	Q96LC9	Bcl-2-modifying factor	BMF			0.695781	0.847288	5	5	5	46.2	20.508	24.872	0.168528	0.0828389	0.966726	1.56503
Q02556;H3BRT4;H3BPS5;H3BT31;H3BVC2;H3BQH6	Q02556;H3BRT4;H3BPS5;H3BT31	Interferon regulatory factor 8	IRF8			0.692434	0.919648	10	10	10	27.7	48.356	19.521	0.168804	0.107822	1.31979	1.17332
P41214;P41214-2;Q5SY38;A0A087X1L6;A0A087WVB6	P41214;P41214-2	Eukaryotic translation initiation factor 2D	EIF2D			0.690834	0.673911	29	29	29	66.1	64.706	261.55	0.0378583	-0.145366	1.26963	1.60121
B0QYD3;Q9UH17;Q9UH17-3;Q9UH17-2;P31941-2;P31941	B0QYD3;Q9UH17;Q9UH17-3;Q9UH17-2	DNA dC->dU-editing enzyme APOBEC-3B	APOBEC3B		+	0.687846	1.96881	10	6	6	28	57.208	25.762	0.792532	0.338453	0.888305	0.732093
Q460N5-1;Q460N5;Q460N5-4;H7C5R8;Q460N5-3;Q460N5-5;H7C4Y3	Q460N5-1;Q460N5;Q460N5-4;H7C5R8;Q460N5-3	Poly [ADP-ribose] polymerase 14	PARP14			0.685775	0.62331	18	18	18	14.9	193.75	85.256	0.134113	-0.286674	1.12974	1.76592
P53007;B4DP62	P53007;B4DP62	Tricarboxylate transport protein, mitochondrial	SLC25A1		+	0.683606	2.42135	15	15	15	49.5	34.012	34.318	0.818427	0.695281	0.445621	0.775095
Q92503;Q92503-2;Q92503-3;K7EJ08;K7ELM0;K7EPE4;K7EQK4;K7ELU0;K7ERB3;K7ESI4;K7EIJ7	Q92503;Q92503-2;Q92503-3;K7EJ08	SEC14-like protein 1	SEC14L1			0.681735	0.616423	24	24	24	48.8	81.249	132.06	-0.166844	-0.0927863	1.48635	1.50022
A0A087WZ62;Q9H6U8;Q9H6U8-3;H0YCW6;A0A087WTZ3;A0A087WVC0;A0A087WZY8;A0A087WX16;A0A087WV58	A0A087WZ62;Q9H6U8;Q9H6U8-3;H0YCW6	Alpha-1,2-mannosyltransferase ALG9	ALG9			0.668752	0.643818	7	7	3	12	95.921	40.969	0.21501	-0.279161	1.01435	1.7248
Q9H0Q0	Q9H0Q0	Protein FAM49A	FAM49A			0.660627	0.61124	4	2	2	15.8	37.312	14.876	-0.063779	-0.194196	1.53197	1.36851
P43250-2;P43250-3;P43250;D6RHX8;F8W9W2;D6RHC7;D6RDA3;P32298-3;P32298-4;P32298-2;P32298;P34947;D6R9V4	P43250-2;P43250-3;P43250;D6RHX8;F8W9W2	G protein-coupled receptor kinase 6	GRK6			0.655782	1.17891	15	15	15	30.6	67.257	56.597	0.224048	0.326997	0.86132	1.21076
A0A0A6YY96;P48200;P48200-2;H0YNL8;H0YMA8;H0YL48;H0YN46	A0A0A6YY96;P48200	Iron-responsive element-binding protein 2	IREB2			0.651417	1.04177	10	10	10	19	105.06	30.1	0.11009	0.283922	1.10031	1.11135
Q9HAT2;Q9HAT2-2	Q9HAT2;Q9HAT2-2	Sialate O-acetylesterase	SIAE			0.650086	0.474259	7	7	7	18.4	58.314	14.782	-0.183836	-0.450991	1.83354	1.40163
Q8N386	Q8N386	Leucine-rich repeat-containing protein 25	LRRC25			0.647272	1.23544	3	3	3	9.2	33.178	5.3597	0.663168	0.35682	NaN	0.921827
P19634;B1ALD5;P19634-2	P19634	Sodium/hydrogen exchanger 1	SLC9A1			0.646996	0.542599	7	7	7	11.5	90.762	12.378	0.267687	0.130799	NaN	1.5425
Q12906;Q12906-5;Q12906-2;Q12906-3;K7EKJ9;K7EQR9;K7ER69;K7EKY0;K7EJ09;K7EM82;K7ERM6;K7ENK6;K7EPG3;K7ELV3;K7EQ75	Q12906;Q12906-5;Q12906-2;Q12906-3	Interleukin enhancer-binding factor 3	ILF3			0.636924	0.319473	55	1	1	72.4	95.337	17.789	1.77132	NaN	-0.748772	0.888221
Q53FA7;Q53FA7-2	Q53FA7	Quinone oxidoreductase PIG3	TP53I3			0.632634	0.735118	4	4	4	19.9	35.536	11.38	0.0788378	-0.0734844	1.14965	1.37553
Q8N0U8;Q8N0U8-2	Q8N0U8;Q8N0U8-2	Vitamin K epoxide reductase complex subunit 1-like protein 1	VKORC1L1			0.629483	0.443878	4	4	4	16.5	19.835	3.1187	-0.325271	0.440633	0.0859685	2.3166
Q9BWE0;Q9BWE0-4;C9JZE3;C9JYJ8;E7EVL6	Q9BWE0;Q9BWE0-4;C9JZE3;C9JYJ8	Replication initiator 1	REPIN1			0.627155	1.02959	6	6	6	14.1	63.574	23.819	0.319352	0.0625362	1.00913	1.1176
Q9Y584	Q9Y584	Mitochondrial import inner membrane translocase subunit Tim22	TIMM22			0.623709	1.20408	5	5	5	35.6	20.031	20.889	1.17576	0.496616	0.143002	0.679458
O00483	O00483	Cytochrome c oxidase subunit NDUFA4	NDUFA4			0.619145	0.536787	4	4	4	46.9	9.3697	7.5015	0.211999	-0.548565	1.26838	1.54477
Q9Y624;A0A087WY82;Q9Y624-2	Q9Y624;A0A087WY82;Q9Y624-2	Junctional adhesion molecule A	F11R			0.617793	0.816815	10	10	10	39.8	32.583	54.176	0.162767	-0.0380952	1.12757	1.21893
H0Y362;Q8NEW0	H0Y362;Q8NEW0	Zinc transporter 7	SLC30A7			0.61641	0.435872	2	2	2	28.7	9.8382	10.072	0.882305	-0.409508	NaN	1.37643
P12532;P12532-2;F8WCN3;C9JSQ1;C9JJX8;C9J995;C9J8F6;C9J6W7;C9JT96;P17540	P12532;P12532-2;F8WCN3	Creatine kinase U-type, mitochondrial	CKMT1A;CKMT1B			0.615371	0.72763	15	15	15	44.4	47.036	306.31	0.0531644	-0.0694519	1.18745	1.29032
J3KPH8;Q8WUI4-3;Q8WUI4-4;Q8WUI4;Q8WUI4-7;Q8WUI4-6;Q8WUI4-5;Q8WUI4-8;Q8WUI4-10;H0YH91;Q8WUI4-9;Q8WUI4-2;A0A087WYQ4;C9JNI4;F8VWY3;C9J102;C9JBC2;C9JVZ1;C9JF80;C9JAH2;C9JEB6;H0YI15;C9JGF5;H0YI41;Q9UKV0-2;Q9UKV0;Q9UKV0-6;Q9UKV0-5;Q9UKV0-7	J3KPH8;Q8WUI4-3;Q8WUI4-4;Q8WUI4;Q8WUI4-7;Q8WUI4-6;Q8WUI4-5;Q8WUI4-8;Q8WUI4-10	Histone deacetylase;Histone deacetylase 7	HDAC7			0.606704	0.729937	19	19	18	28.6	108.97	140.26	-0.0304066	0.0578315	0.971369	1.42802
Q8NF50-3;Q8NF50;Q8NF50-4;Q8NF50-2;A2A369;E9PDJ4;A2A370;C9J7A3;H0Y7L2;Q96N67-4;Q96N67-3;Q96N67-5;Q96N67-2;Q96N67-6;Q96N67;C9J613	Q8NF50-3;Q8NF50;Q8NF50-4;Q8NF50-2;A2A369	Dedicator of cytokinesis protein 8	DOCK8		+	0.598374	1.47638	66	66	66	38.2	230.82	317.58	0.34161	0.301354	0.87798	0.872552
P49662-2;P49662;A0A087WZP8;E9PMT1;P51878-3;P51878-6;P51878-2;P51878;P51878-5;H0YD34;H7C0P5	P49662-2;P49662;A0A087WZP8	Caspase-4;Caspase-4 subunit 1;Caspase-4 subunit 2;Caspase	CASP4			0.597696	0.260138	10	10	10	42.7	36.704	26.314	-0.203389	-0.275193	NaN	2.27167
Q9GZY6;C9JA24;Q9GZY6-2;C9JXP0;C9JDY7;F8W947	Q9GZY6	Linker for activation of T-cells family member 2	LAT2			0.595433	1.20274	7	7	7	42	26.55	133.28	0.948113	0.954941	0.240253	0.238425
Q01432;Q01432-5;Q01432-4;E9PKC5;Q01432-6;Q01432-3;E9PIR5;E9PLK6;Q01432-2;P23109-2;P23109;E9PPG2;H0YDC3	Q01432;Q01432-5;Q01432-4;E9PKC5;Q01432-6;Q01432-3	AMP deaminase 3	AMPD3		+	0.588784	3.17443	17	17	17	27.4	88.811	62.836	0.604652	0.475915	0.611833	0.662734
Q8TDB6;Q8TDB6-2	Q8TDB6	E3 ubiquitin-protein ligase DTX3L	DTX3L			0.588412	0.572854	11	11	11	18.6	83.553	76.4	0.0326985	-0.301639	1.54003	1.08256
O95236-2;O95236;O95236-3	O95236-2;O95236	Apolipoprotein L3	APOL3			0.585044	0.710514	8	8	8	27.5	36.545	31.057	0.0305161	-0.0390732	0.959622	1.38911
H0YKQ8;Q9UHW9-6;Q9UHW9-5;Q9UHW9-2;Q9UHW9-3;Q9UHW9-4;Q9UHW9;H0YMQ9;B3KXX3;H0YNJ5;J3QSF2;H0YKE6	H0YKQ8;Q9UHW9-6;Q9UHW9-5;Q9UHW9-2;Q9UHW9-3;Q9UHW9-4;Q9UHW9;H0YMQ9;B3KXX3	Solute carrier family 12 member 6	SLC12A6			0.584298	1.17797	8	8	4	8.5	103.82	21.67	0.186344	0.268794	0.927441	0.954613
Q92845;Q92845-2;Q92845-3;Q92845-4	Q92845;Q92845-2;Q92845-3;Q92845-4	Kinesin-associated protein 3	KIFAP3			0.581277	0.77639	21	20	20	31.7	91.204	129.11	0.0714668	-0.00501486	1.011	1.24766
Q13049;Q5JVY0	Q13049	E3 ubiquitin-protein ligase TRIM32	TRIM32			0.577567	0.281463	4	4	4	7.2	71.988	4.8709	-0.469886	0.165172	NaN	2.03741
P14598;A6NI72;A8MVU1;P14598-2;A0A087X1W0	P14598;A6NI72;A8MVU1;P14598-2	Neutrophil cytosol factor 1;Putative neutrophil cytosol factor 1B;Putative neutrophil cytosol factor 1C	NCF1;NCF1B;NCF1C		+	0.576092	1.85824	23	23	16	63.3	44.651	216.91	0.505124	0.293959	0.770364	0.734923
Q8WXK3	Q8WXK3	Ankyrin repeat and SOCS box protein 13	ASB13			0.574946	0.302968	1	1	1	4	30.007	2.9333	0.0359488	-0.274529	NaN	1.96342
Q99653;H0YKE7;F5GX29;H0YNG9;H0YLY7;H0YLX1	Q99653;H0YKE7;F5GX29;H0YNG9	Calcineurin B homologous protein 1	CHP1		+	0.574087	1.58658	10	10	10	62.1	22.456	96.534	0.411886	0.275722	0.728399	0.880338
Q8NFY9;C9JAA6;Q8NFY9-2;C9J331	Q8NFY9	Kelch repeat and BTB domain-containing protein 8	KBTBD8			0.573555	0.499419	9	9	9	20.5	68.822	37.045	-0.0439044	-0.414711	1.15329	1.59955
O14646-2;O14646;H0Y8V4;A0A087WVF4	O14646-2;O14646	Chromodomain-helicase-DNA-binding protein 1	CHD1			0.572066	0.601354	19	12	12	12.1	196.59	22.006	-0.121546	-0.128093	1.23714	1.30077
C9JGI3;P19971;P19971-2	C9JGI3;P19971;P19971-2	Thymidine phosphorylase	TYMP			0.56584	0.547076	6	6	6	16.2	46.087	12.293	-0.160662	-0.16364	1.02446	1.5632
Q8TD16;Q8TD16-2;U3KQF7;A0A087WYJ7	Q8TD16;Q8TD16-2	Protein bicaudal D homolog 2	BICD2			0.564055	0.79656	39	39	36	47.7	93.532	201.88	0.0148494	0.0802483	1.21039	0.950732
P26572;D6RF69;D6RA48;D6RBS3;D6RAK2;D6R9U2;D6RD15;D6RB69;D6RHZ8	P26572	Alpha-1,3-mannosyl-glycoprotein 2-beta-N-acetylglucosaminyltransferase	MGAT1			0.555969	1.17746	7	7	7	24.5	50.878	17.891	0.386846	0.0966667	0.987903	0.752461
Q9NPA3	Q9NPA3	Mid1-interacting protein 1	MID1IP1			0.554482	0.592514	8	8	8	60.1	20.201	52.898	0.126832	-0.264894	0.82725	1.52874
Q8NB16;I3L4A6;I3L2T9;Q8NB16-2;I3L4Z5	Q8NB16	Mixed lineage kinase domain-like protein	MLKL		+	0.553104	2.677	10	10	10	23.1	54.478	14.881	0.67828	0.476226	0.611645	0.446266
Q9H2C0	Q9H2C0	Gigaxonin	GAN			0.55228	0.819271	10	10	10	21.6	67.638	21.962	0.184261	-0.0611196	1.09956	0.986416
Q96II8;Q96II8-4;Q96II8-2;Q96II8-3;E9PD99;H7C1G3;H7C0J8;H7C0F9;F8WFB5	Q96II8;Q96II8-4;Q96II8-2;Q96II8-3;E9PD99	Leucine-rich repeat and calponin homology domain-containing protein 3	LRCH3			0.550841	1.25858	19	17	17	37.2	86.082	36.906	0.335426	0.181675	0.977536	0.708727
Q96S66-3;Q96S66-2;Q96S66;Q96S66-4;Q5T1P5	Q96S66-3;Q96S66-2;Q96S66;Q96S66-4	Chloride channel CLIC-like protein 1	CLCC1			0.548183	1.25861	5	5	5	13.3	47.436	8.2186	0.792207	0.328836	NaN	0.523504
A0A0A0MT72;Q9BSQ5;Q9BSQ5-2;C9JUH3;Q9BSQ5-3;Q9BSQ5-4;E9PEC4	A0A0A0MT72;Q9BSQ5;Q9BSQ5-2;C9JUH3;Q9BSQ5-3;Q9BSQ5-4;E9PEC4	Cerebral cavernous malformations 2 protein	CCM2		+	0.545884	1.41641	13	13	13	33.1	48.194	72.033	0.522965	0.178746	0.548831	0.932995
Q02338;E9PCG9;C9K0G7;H7C2W1;A0A0G2JRH6;C9JM78;C9JQ90;A0A0G2JRX6;C9JEB9	Q02338;E9PCG9;C9K0G7	D-beta-hydroxybutyrate dehydrogenase, mitochondrial	BDH1			0.540799	0.775635	17	17	17	57.1	38.157	129.29	0.122099	-0.0624447	0.9911	1.11244
Q4G176;F5H5A1;F5H755;F5H362;F5H2G6;H0YGC7;F5H3B2;F5GX20;H0YH37;H0YGJ0	Q4G176;F5H5A1;F5H755;F5H362	Acyl-CoA synthetase family member 3, mitochondrial	ACSF3		+	0.538877	2.16669	23	23	23	44.3	64.129	111.68	0.464763	0.379843	0.555718	0.755186
P42768;C9J3B7	P42768	Wiskott-Aldrich syndrome protein	WAS			0.531514	0.953282	24	24	24	51.2	52.912	219.91	0.273047	0.0330882	0.714663	1.10526
Q08257;Q08257-3;A6NP24;C9JH92;Q08257-2	Q08257;Q08257-3;A6NP24;C9JH92;Q08257-2	Quinone oxidoreductase	CRYZ			0.530223	1.28711	23	23	23	83.3	35.206	323.31	0.454901	0.124196	0.604166	0.93763
Q27J81-2;Q27J81;A0A0A0MQU1;Q27J81-3	Q27J81-2;Q27J81;A0A0A0MQU1	Inverted formin-2	INF2			0.530152	0.422999	4	4	4	5.4	134.62	8.2896	0.0370291	1.47259	NaN	0.0808352
Q9UDY2-3;Q9UDY2;Q9UDY2-7;Q9UDY2-6;Q9UDY2-4;Q9UDY2-2;Q9UDY2-5	Q9UDY2-3;Q9UDY2;Q9UDY2-7;Q9UDY2-6;Q9UDY2-4;Q9UDY2-2;Q9UDY2-5	Tight junction protein ZO-2	TJP2			0.5291	0.432128	31	31	31	34.2	131.37	233.77	-0.177854	-0.49003	1.42712	1.35716
Q9NVQ4;C9JDZ2;Q9NVQ4-3;Q9NVQ4-2	Q9NVQ4;C9JDZ2;Q9NVQ4-3;Q9NVQ4-2	Fas apoptotic inhibitory molecule 1	FAIM		+	0.528739	1.99678	8	8	8	45.3	20.215	51.012	0.736052	0.626019	0.380064	0.372823
Q12797-10;Q12797	Q12797-10;Q12797	Aspartyl/asparaginyl beta-hydroxylase	ASPH		+	0.524905	1.65966	8	8	8	14.1	83.267	16.644	0.799747	0.644964	0.284869	0.370042
P62328;CON__P21752	P62328	Thymosin beta-4;Hematopoietic system regulatory peptide	TMSB4X			0.522547	0.720441	4	4	3	61.4	5.0526	22.263	0.0702998	-0.0924017	1.06936	1.04293
P0C7P0	P0C7P0	CDGSH iron-sulfur domain-containing protein 3, mitochondrial	CISD3			0.520755	0.66247	4	4	4	29.1	14.215	10.043	0.0486658	-0.121126	0.867343	1.28814
Q9Y4G8;H0Y8T6;H0Y8N8;H0Y8H7;H0YAJ8	Q9Y4G8	Rap guanine nucleotide exchange factor 2	RAPGEF2			0.515276	0.473806	16	12	12	12.2	167.41	35.153	0.179727	-0.566805	1.49723	0.950955
P42081-3;P42081;H7C4F8;P42081-6;P42081-4;C9JXS1;P42081-2;P42081-5	P42081-3;P42081;H7C4F8;P42081-6;P42081-4;C9JXS1	T-lymphocyte activation antigen CD86	CD86			0.513878	0.767964	5	5	5	16.4	37.006	15.659	0.121251	-0.0740158	0.961772	1.0465
Q8N490-4;Q8N490-3;Q8N490	Q8N490-4;Q8N490-3;Q8N490	Probable hydrolase PNKD	PNKD			0.512539	0.367758	5	5	5	21.5	36.848	25.326	0.0843186	-0.0956045	NaN	1.5489
P60903	P60903	Protein S100-A10	S100A10			0.508589	0.203602	3	3	3	37.1	11.203	8.6243	2.58009	1.61805	-1.10908	-1.05471
Q9NWX5;F6TX30;Q9NWX5-2	Q9NWX5;F6TX30;Q9NWX5-2	Ankyrin repeat and SOCS box protein 6	ASB6			0.507149	1.16495	7	7	7	20	47.135	48.599	0.321567	0.0945064	0.886121	0.726401
Q9UIB8-3;Q9UIB8-2;Q9UIB8;Q9UIB8-6;Q9UIB8-5;Q9UIB8-4;Q9UIB8-7	Q9UIB8-3;Q9UIB8-2;Q9UIB8;Q9UIB8-6;Q9UIB8-5;Q9UIB8-4	SLAM family member 5	CD84			0.506762	0.686293	4	4	4	16.2	36.87	35.602	0.749038	0.354452	-0.281176	1.20473
A2RTX5-2;A2RTX5;B7ZLP8;H0YKB9	A2RTX5-2;A2RTX5;B7ZLP8	Probable threonine--tRNA ligase 2, cytoplasmic	TARSL2			0.505843	1.09634	8	4	4	10.9	81.56	10.301	0.357696	0.0882773	0.569005	1.00839
Q9BTX7;Q5QPC2;A6PVK2	Q9BTX7;Q5QPC2	Alpha-tocopherol transfer protein-like	TTPAL			0.505477	0.805967	10	10	10	31	38.515	22.73	0.0637107	0.0192037	0.930397	1.00859
P52564;P52564-2;K7EIW3;A0A0A0MRF7;K7ELM6	P52564;P52564-2	Dual specificity mitogen-activated protein kinase kinase 6	MAP2K6			0.505258	0.584543	18	12	12	60.5	37.492	41.69	0.0770106	-0.280773	0.9387	1.28609
P33908;P33908-2	P33908;P33908-2	Mannosyl-oligosaccharide 1,2-alpha-mannosidase IA	MAN1A1		+	0.504881	1.95161	16	16	16	31.5	72.968	74.558	0.478969	0.449852	0.33308	0.757623
O60512;O60512-2	O60512	Beta-1,4-galactosyltransferase 3;N-acetyllactosamine synthase;Beta-N-acetylglucosaminylglycopeptide beta-1,4-galactosyltransferase;Beta-N-acetylglucosaminyl-glycolipid beta-1,4-galactosyltransferase	B4GALT3			0.504113	0.650314	9	9	9	36.1	43.927	21.878	0.29131	-0.295128	0.777704	1.24257
O43516;O43516-3;A0A087WW70;O43516-2;O43516-4;E9PB87;C9JTB9;B8ZZ90;C9JB04	O43516;O43516-3;A0A087WW70;O43516-2;O43516-4;E9PB87	WAS/WASL-interacting protein family member 1	WIPF1			0.501576	0.789474	11	11	11	25.6	51.258	40.699	0.691406	-0.216183	0.451541	1.07954
Q96HD9;E9PRA7	Q96HD9	N-acyl-aromatic-L-amino acid amidohydrolase (carboxylate-forming)	ACY3		+	0.499427	1.62748	16	16	16	69	35.241	323.31	0.528677	0.165301	0.600841	0.702891
Q8IY92-2;Q8IY92	Q8IY92-2;Q8IY92	Structure-specific endonuclease subunit SLX4	SLX4			0.498336	0.756079	4	4	4	4.1	165.9	15.198	0.956348	0.135404	NaN	0.403256
Q96AQ6-2;Q96AQ6;Q96AQ6-3;F2Z2Z8;Q5T173	Q96AQ6-2;Q96AQ6;Q96AQ6-3	Pre-B-cell leukemia transcription factor-interacting protein 1	PBXIP1			0.49787	0.857196	9	9	9	16.2	77.683	13.809	-0.143785	1.03598	0.417704	0.681585
Q92624	Q92624	Amyloid protein-binding protein 2	APPBP2			0.497289	0.623493	5	5	5	10.8	66.853	14.77	0.0780001	-0.211498	0.88924	1.23341
B4DTS2;Q9BZL6;M0R2Z8;M0QXC6;J3KMW1;C9JDA4;J3KNE8;E7ET86;A0A096LNR9;Q8IVW4-2;Q92772;Q8IVW4;O76039-2;O76039	B4DTS2;Q9BZL6	Serine/threonine-protein kinase;Serine/threonine-protein kinase D2	PRKD2		+	0.496018	1.42168	21	21	5	39	97.742	109.86	0.329921	0.217231	0.598175	0.838744
Q92930;H0YNE9;H0YMN7	Q92930;H0YNE9;H0YMN7	Ras-related protein Rab-8B	RAB8B			0.494343	0.887583	11	5	5	47.3	23.584	24.549	0.23099	0.032242	0.597603	1.11654
Q5QP56;Q9H1R6;Q5TE64;Q07817-3;Q07817;Q07817-2;Q5QP59	Q5QP56;Q9H1R6;Q5TE64;Q07817-3;Q07817;Q07817-2	Bcl-2-like protein 1	BCL2L1			0.491186	1.15341	6	6	6	24.9	20.244	74.783	0.267635	0.146525	0.616734	0.933849
P51826;P51826-2;H7C3W3;H7C4C2	P51826;P51826-2;H7C3W3	AF4/FMR2 family member 3	AFF3			0.488429	1.01905	6	6	6	5.5	133.47	23.978	0.718118	-0.0914484	0.512075	0.814971
X6R7X0;Q96MN5;Q96MN5-2	X6R7X0;Q96MN5;Q96MN5-2	Transcription elongation factor A N-terminal and central domain-containing protein 2	TCEANC2			0.488188	0.627836	5	5	5	20.2	27.369	12.755	0.340258	NaN	1.04991	0.0743955
Q6KCM7-6	Q6KCM7-6	Calcium-binding mitochondrial carrier protein SCaMC-2	SLC25A25			0.483423	0.847978	6	6	1	23.8	40.589	18.328	1.13854	0.5614	0.0440444	0.189713
Q9NVE7;E9PHT6;H0YA26;H0Y9E4;D6RJF3;H0YA31	Q9NVE7;E9PHT6;H0YA26	Pantothenate kinase 4	PANK4			0.479495	0.77031	23	23	23	43.5	85.99	118.07	-0.0515809	0.0943712	0.909351	0.965841
Q8NF37;A0A0G2JRI7;A0A0G2JQ62	Q8NF37;A0A0G2JRI7;A0A0G2JQ62	Lysophosphatidylcholine acyltransferase 1	LPCAT1		+	0.47827	2.6122	6	6	6	12.7	59.151	19.385	0.561579	0.397803	0.568324	0.385375
Q6IC98;H0Y5A3;Q6IC98-2	Q6IC98	GRAM domain-containing protein 4	GRAMD4		+	0.474256	1.75841	7	7	7	12.3	66.407	12.588	0.590832	0.191689	0.482745	0.631757
P26447	P26447	Protein S100-A4	S100A4			0.472229	0.466779	3	3	3	27.7	11.728	6.9068	1.20926	1.18295	-0.193998	-0.309293
Q9ULZ3-2	Q9ULZ3-2	Apoptosis-associated speck-like protein containing a CARD	PYCARD			0.471705	0.874687	15	1	1	78.4	19.969	19.575	NaN	0.133564	0.798756	0.482795
Q6ZN54-5;Q6ZN54;Q6ZN54-4;Q6ZN54-6;Q6ZN54-3;H3BRA7;H3BMP4;H3BT01;H3BT87;H3BSH6;H3BMT5;H3BTS7;Q6ZN54-2;H3BQX9;H3BQH5	Q6ZN54-5;Q6ZN54;Q6ZN54-4;Q6ZN54-6;Q6ZN54-3	Differentially expressed in FDCP 8 homolog	DEF8			0.471704	0.500718	5	5	5	17.5	52.28	9.506	-0.0751904	-0.31224	1.29502	0.979231
C9JEJ2;P49585;C9J050;H7C1T3;C9J2E1;H7BZN1;C9JPY0;Q9Y5K3-2;Q9Y5K3-4;Q9Y5K3-3;Q9Y5K3;C9JVS0;F8WAZ5;F8WBU2;F2Z2B1	C9JEJ2;P49585;C9J050;H7C1T3	Choline-phosphate cytidylyltransferase A	PCYT1A			0.47156	0.79073	21	21	21	60.3	43.263	110.15	0.0403337	0.0184917	0.914335	0.91308
E9PR30;P62861	E9PR30;P62861	40S ribosomal protein S30	FAU			0.470528	0.669064	3	3	3	12.2	10.905	8.8579	-0.227988	0.729879	1.15115	0.229078
Q5K651;C9JKF1	Q5K651;C9JKF1	Sterile alpha motif domain-containing protein 9	SAMD9			0.470306	0.501125	38	38	35	32	184.28	137.18	-0.123401	-0.285829	1.15458	1.13587
Q9UMR2;H3BQK0;Q9UMR2-2;Q9UMR2-4;Q9UMR2-3;H3BN59;H3BMQ5	Q9UMR2;H3BQK0;Q9UMR2-2;Q9UMR2-4;Q9UMR2-3	ATP-dependent RNA helicase DDX19B	DDX19B			0.468079	0.77935	28	4	2	71.6	53.926	86.341	0.0644196	0.00561564	0.757535	1.04475
B2WTI3;B2WTI4;K7EJU9;Q6NYC1-2;Q6NYC1;Q6NYC1-3	B2WTI3;B2WTI4;K7EJU9;Q6NYC1-2;Q6NYC1;Q6NYC1-3	Bifunctional arginine demethylase and lysyl-hydroxylase JMJD6	JMJD6			0.467171	0.694973	9	9	9	46.9	39.241	70.998	0.0327576	-0.0759914	1.06922	0.842697
A6QL64;Q5JPF3-3;Q8N2N9-3;Q8N2N9-2;Q8N2N9;Q5JPF3;A0A087X1R3;A6QL64-3;Q5JPF3-2	A6QL64;Q5JPF3-3;Q8N2N9-3;Q8N2N9-2;Q8N2N9;Q5JPF3	Ankyrin repeat domain-containing protein 36A;Ankyrin repeat domain-containing protein 36C;Ankyrin repeat domain-containing protein 36B	ANKRD36;ANKRD36C;ANKRD36B			0.466158	1.00547	3	3	3	4.6	217.46	5.0165	-0.0353423	0.342441	0.739589	0.817943
Q9H1C4;E9PNE5;E9PR93	Q9H1C4;E9PNE5	Protein unc-93 homolog B1	UNC93B1			0.463393	0.898283	4	4	4	7.9	66.63	9.5927	0.432338	-0.112412	0.584	0.949645
Q14764;H3BRL2;H3BQK6;H3BPZ2;H3BNF2;H3BUP3;H3BQE7;H3BP76;H3BUK7;H3BNF6	Q14764	Major vault protein	MVP			0.460617	0.544637	9	9	9	11.6	99.326	13.327	0.328779	-0.489403	1.0653	0.937795
P12236	P12236	ADP/ATP translocase 3;ADP/ATP translocase 3, N-terminally processed	SLC25A6		+	0.458673	4.51813	22	10	5	65.4	32.866	63.758	0.450814	0.432532	0.483674	0.467673
P12955;P12955-3;P12955-2;K7ES25;V9GYE4;V9GY89;V9GYL0	P12955;P12955-3;P12955-2	Xaa-Pro dipeptidase	PEPD			0.457915	1.00432	12	12	12	31	54.548	77.079	0.140094	0.129217	0.907814	0.654536
A0A0C4DGZ1;Q8N5P1	A0A0C4DGZ1;Q8N5P1	Zinc finger CCCH domain-containing protein 8	ZC3H8			0.456812	0.731232	4	4	4	19.2	34.315	32.85	0.0379174	-0.0337763	1.02567	0.797438
O75410-7;O75410;O75410-2;E7EVI4;E7ET87;O75410-3;H0YAY0;R4GMT7;E5RFM9;B4E3H6;H0YBT8;O75410-5;O75410-4;O75410-6;O75410-8;E5RJU4;E5RJG6;E5RIP3;Q4VXL4;D6RAA5;Q4VXL8;E7EMZ9;E9PBC6;O95359-2;O95359-6;O95359-1;O95359-5;O95359-3;O95359	O75410-7;O75410;O75410-2;E7EVI4;E7ET87;O75410-3;H0YAY0;R4GMT7;E5RFM9;B4E3H6;H0YBT8;O75410-5;O75410-4;O75410-6	Transforming acidic coiled-coil-containing protein 1	TACC1			0.456211	1.27874	25	25	25	43.6	79.871	211.21	0.244019	0.181039	0.605779	0.794007
Q13342-3;Q13342-6;Q13342-5;Q13342;Q13342-2;Q13342-4	Q13342-3;Q13342-6;Q13342-5;Q13342	Nuclear body protein SP140	SP140			0.454394	0.499252	13	12	9	19.3	86.009	45.497	-0.0801119	-0.299365	0.954792	1.24226
Q38SD2;E9PMK9;E9PK39;Q38SD2-2;H0YEW1	Q38SD2;E9PMK9;E9PK39	Leucine-rich repeat serine/threonine-protein kinase 1	LRRK1			0.453445	0.655536	13	13	13	7.7	225.39	17.768	-0.0347791	-0.0416695	0.754802	1.13543
H0YKR4;H0YNR6;H0YN04;H0YKC9;Q9HA82;H0YLY3;H0YMY6	H0YKR4;H0YNR6;H0YN04;H0YKC9;Q9HA82;H0YLY3	Ceramide synthase 4	CERS4		+	0.452544	2.01374	3	3	3	21.3	16.237	14.308	0.499585	0.270708	0.405775	0.634106
I3L112;P52429	I3L112;P52429	Diacylglycerol kinase;Diacylglycerol kinase epsilon	DGKE			0.451626	0.43436	3	3	3	7.9	51.101	5.4287	0.0180743	0.103934	NaN	1.23287
P40763;P40763-3;P40763-2;G8JLH9;K7EP08	P40763;P40763-3;P40763-2;G8JLH9	Signal transducer and activator of transcription 3;Signal transducer and activator of transcription	STAT3			0.447666	0.396563	34	34	34	58.2	88.067	323.31	-0.291486	-0.396783	1.15581	1.32312
Q86UL3;E5RIA1;E5RHA6	Q86UL3;E5RIA1;E5RHA6	Glycerol-3-phosphate acyltransferase 4	AGPAT6		+	0.444641	2.0432	5	5	5	14.7	52.07	19.391	0.437955	0.245374	0.503857	0.591375
C9JZY6;P62256;H7C4M9;C9JZG9;P62256-2;C9J8Q9	C9JZY6;P62256;H7C4M9;C9JZG9;P62256-2;C9J8Q9	Ubiquitin-conjugating enzyme E2 H	UBE2H			0.442666	0.879877	6	6	6	48.8	13.818	17.376	0.0330527	0.118891	0.89344	0.725279
Q9Y2L9-2;Q9Y2L9;Q9Y2L9-3;C9JWE0;C9J5B8;Q5VUJ6-2;Q5VUJ6	Q9Y2L9-2;Q9Y2L9;Q9Y2L9-3	Leucine-rich repeat and calponin homology domain-containing protein 1	LRCH1			0.440739	1.11499	19	19	17	37.8	77.224	137.4	0.0980576	0.225152	0.644964	0.794783
O95081;A0A0C4DG34;O95081-2	O95081;A0A0C4DG34;O95081-2	Arf-GAP domain and FG repeat-containing protein 2	AGFG2			0.43978	0.634332	7	7	7	16.4	48.962	39.808	-0.0473989	-0.0430958	0.702125	1.14749
E7ER32;A0A087X287;W0Z7M9;Q969V6;B0QY83;A0A087WU73;B0QY84;B0QY74;I3L2S3	E7ER32;A0A087X287;W0Z7M9;Q969V6;B0QY83;A0A087WU73;B0QY84	MKL/myocardin-like protein 1;Phosphatase and actin regulator	MKL1;mkl1		+	0.437531	1.36389	8	8	7	12.4	85.075	24.776	0.609244	0.0862402	0.399445	0.655194
Q96BW9-3;Q96BW9-2;Q96BW9;A0A0G2JQ92;H7C1A2;B4E101;G3V0F3	Q96BW9-3;Q96BW9-2;Q96BW9	Phosphatidate cytidylyltransferase, mitochondrial	TAMM41			0.437502	1.03157	11	11	11	41.5	38.078	60.513	0.217759	0.0568609	0.653243	0.822146
G5EA37;Q5MNZ9-2;Q5MNZ9;K7ELY0;K7EK57	G5EA37;Q5MNZ9-2;Q5MNZ9;K7ELY0	WD repeat domain phosphoinositide-interacting protein 1	WIPI1			0.436333	0.320467	4	4	4	18.7	39.942	13.097	-0.0594936	-0.0763868	1.44488	NaN
O60518;A0A096LPA6;A0A096LNS2	O60518	Ran-binding protein 6	RANBP6			0.436278	1.02665	11	8	8	10.9	124.71	23.134	0.201045	0.0739573	0.84551	0.624599
A0A0A0MT32;P38571-2;P38571;Q5T073	A0A0A0MT32;P38571-2;P38571;Q5T073	Lysosomal acid lipase/cholesteryl ester hydrolase	LIPA			0.43457	0.367133	4	4	4	15.9	32.57	22.503	-0.289362	-0.487743	1.25229	1.26309
P78310;P78310-2;P78310-6;P78310-7;P78310-5;P78310-4;P78310-3	P78310;P78310-2;P78310-6;P78310-7;P78310-5	Coxsackievirus and adenovirus receptor	CXADR			0.431639	0.739846	12	12	12	36.7	40.029	32.273	0.0582025	0.0536674	0.505485	1.1092
Q9UK97-3;Q9UK97-2;Q9UK97;V9GZ74;H7C4H6;C9JDZ9;C9IY65	Q9UK97-3;Q9UK97-2;Q9UK97;V9GZ74;H7C4H6	F-box only protein 9	FBXO9			0.431043	0.716044	6	6	6	18.6	47.361	10.243	-0.0673633	0.124725	0.580917	1.0859
P08243;P08243-2;P08243-3;F8WEJ5;C9J057;C9JT45;C9JM09;C9JLN6;C9J605;C9JLA3	P08243;P08243-2;P08243-3;F8WEJ5	Asparagine synthetase [glutamine-hydrolyzing]	ASNS			0.428182	0.495612	47	47	47	79.1	64.369	323.31	-0.355693	0.013498	1.18142	0.873503
Q8TDQ7;Q8TDQ7-2;Q8TDQ7-3;Q8TDQ7-4;Q8TDQ7-5	Q8TDQ7;Q8TDQ7-2;Q8TDQ7-3;Q8TDQ7-4;Q8TDQ7-5	Glucosamine-6-phosphate isomerase 2	GNPDA2			0.427173	1.21759	11	5	5	51.8	31.084	17.274	0.263889	0.134352	0.791606	0.518846
Q9BY11;F6U236	Q9BY11;F6U236	Protein kinase C and casein kinase substrate in neurons protein 1	PACSIN1			0.42705	0.568102	29	29	29	65.1	50.965	288.69	-0.229588	0.00575919	1.05047	0.881561
P05141	P05141	ADP/ATP translocase 2;ADP/ATP translocase 2, N-terminally processed	SLC25A5		+	0.425253	3.82729	23	23	9	55	32.852	70.072	0.433643	0.435202	0.375623	0.456544
Q14761	Q14761	Protein tyrosine phosphatase receptor type C-associated protein	PTPRCAP			0.422336	0.750867	3	3	3	14.1	21.196	6.4364	0.770486	0.0558898	0.440633	NaN
P06213-2;P06213;M0R3E6;P14616	P06213-2;P06213	Insulin receptor;Insulin receptor subunit alpha;Insulin receptor subunit beta	INSR			0.420611	0.346857	23	23	21	19.9	155.14	62.156	-0.250476	-0.568538	1.1505	1.35096
P43007;P43007-2	P43007;P43007-2	Neutral amino acid transporter A	SLC1A4		+	0.420558	1.38848	11	11	11	28.8	55.722	117.09	0.221623	0.198368	0.647084	0.615154
O94762;O94762-4;J3KTQ2;O94762-2;O94762-3;J3KSL7;J3KS37;J3KRM6;J3KSV9	O94762;O94762-4;J3KTQ2;O94762-2;O94762-3	ATP-dependent DNA helicase Q5	RECQL5			0.420469	0.75104	20	20	20	24.9	108.86	67.664	0.0518626	-0.0366147	0.797428	0.869201
Q9UKK3	Q9UKK3	Poly [ADP-ribose] polymerase 4	PARP4			0.41903	0.76269	6	6	6	3.7	192.59	10.611	0.0924325	-0.05291	0.731618	0.90498
Q9Y2C4;Q9Y2C4-3;Q9Y2C4-4;F8WE28;F8WE38;H7C0W6	Q9Y2C4;Q9Y2C4-3;Q9Y2C4-4	Nuclease EXOG, mitochondrial	EXOG			0.416624	0.679961	4	4	4	11.7	41.084	14.228	-0.0402613	-0.02056	0.961253	0.766063
O43772;C9JPE1;F8WEF6	O43772;C9JPE1	Mitochondrial carnitine/acylcarnitine carrier protein	SLC25A20		+	0.415683	1.60545	18	18	18	71.4	32.943	36.332	0.279879	0.223917	0.511266	0.647671
O95248-4;G5E933;O95248;H0Y5W8	O95248-4;G5E933;O95248	Myotubularin-related protein 5	SBF1		+	0.415596	1.38438	40	40	39	28.9	211.05	141.46	0.322325	0.133958	0.510962	0.695139
A0A087WUQ6;P07203;P07203-2	A0A087WUQ6;P07203	Glutathione peroxidase;Glutathione peroxidase 1	GPX1			0.414359	0.104431	7	7	7	60.4	21.938	14.035	1.08813	-0.793707	-2.58935	3.95237
Q8N392;Q8N392-2	Q8N392;Q8N392-2	Rho GTPase-activating protein 18	ARHGAP18			0.41307	0.330184	11	11	11	21	74.976	35.2	-0.193961	0.107956	NaN	1.32521
P53999;D6RC37;D6R970	P53999	Activated RNA polymerase II transcriptional coactivator p15	SUB1			0.411588	0.439807	11	11	11	72.4	14.395	54.361	-0.374622	-0.11962	1.1375	1.00309
Q14693;Q14693-2;Q14693-4;Q14693-3;Q14693-5;Q14693-7;A0A0A0MS66;H7C3T1;Q14693-6;Q92539	Q14693;Q14693-2;Q14693-4;Q14693-3;Q14693-5;Q14693-7	Phosphatidate phosphatase LPIN1	LPIN1			0.410502	0.385177	10	10	10	16.9	98.663	22.07	0.374673	-0.262365	NaN	1.1192
Q9NRM2;H7C460;C9JH62;G5E9M4	Q9NRM2	Zinc finger protein 277	ZNF277			0.4094	0.483078	7	7	7	18	52.787	21.312	0.099649	0.0798389	NaN	1.04871
O60343-2;O60343-3;O60343;O60343-5;O60343-4;Q5JU47	O60343-2;O60343-3;O60343	TBC1 domain family member 4	TBC1D4		+	0.409386	3.00795	47	47	45	42.8	139.55	323.31	0.490537	0.427821	0.361656	0.35753
E7EUG2;Q92617-3;Q92617-6;Q92617;A8MRT5;F6SDX0;E9PKP1;Q92617-2;Q92617-5;C9JG80;A6NJU9;E5RHQ5;C9K082;F8VY45;F5H4N5;A0A0A6YYH2;F5H3D4;F5GW90;C9IYD2;F8W0I5;A6NJ64;Q92617-4	E7EUG2;Q92617-3;Q92617-6;Q92617;A8MRT5;F6SDX0;E9PKP1;Q92617-2;Q92617-5;C9JG80;A6NJU9;E5RHQ5	Nuclear pore complex-interacting protein family member B3;Nuclear pore complex-interacting protein family member B5;Nuclear pore complex-interacting protein family member B4;Putative NPIP-like protein LOC613037;Nuclear pore complex-interacting protein family member B11	NPIPB5;NPIPB3;NPIPB4;NPIPB11			0.409377	1.08344	3	3	3	5.9	125.18	3.686	0.170313	0.174534	0.446362	0.846298
Q5T653;C9IY40;C9JZW2;C9JZG7	Q5T653;C9IY40	39S ribosomal protein L2, mitochondrial	MRPL2			0.409195	0.699233	8	8	8	37	33.3	49.421	0.153639	-0.155293	0.700085	0.938348
F5H527;Q76I76;K7EKN7;Q76I76-4;J3KSQ9;K7EP00;Q76I76-3;Q76I76-2	F5H527;Q76I76	Protein phosphatase Slingshot homolog 2	SSH2			0.407329	0.890046	6	6	6	4.9	161.15	8.7415	0.267896	-0.0806676	0.670568	0.77152
Q9NRZ7-2;Q9NRZ7;Q9NRZ7-3;C9JL26	Q9NRZ7-2;Q9NRZ7;Q9NRZ7-3	1-acyl-sn-glycerol-3-phosphate acyltransferase gamma	AGPAT3			0.40474	0.914942	8	8	8	25.5	36.271	15.199	0.179989	-0.00935006	0.68921	0.759112
Q99828;Q99828-2	Q99828;Q99828-2	Calcium and integrin-binding protein 1	CIB1			0.403035	0.939459	9	9	9	57.1	21.703	40.676	0.0340126	0.147567	0.768078	0.662483
Q9Y251-2;Q9Y251;Q9Y251-4;Q9Y251-3;D6RAQ1;D6RHG4	Q9Y251-2;Q9Y251;Q9Y251-4;Q9Y251-3	Heparanase;Heparanase 8 kDa subunit;Heparanase 50 kDa subunit	HPSE			0.400058	0.733531	8	8	8	21.2	54.733	16.983	0.0578571	-0.0463549	0.906198	0.682534
A0A0A0MSK5;Q5JTV8;Q5JTV8-3;J3KN66;H0Y4R4;H0YD16;Q5JTV8-2;H0YDU3	A0A0A0MSK5;Q5JTV8;Q5JTV8-3;J3KN66;H0Y4R4	Torsin-1A-interacting protein 1	TOR1AIP1			0.399197	0.838757	16	16	15	45.5	52.406	80.244	0.229399	-0.0652948	0.554442	0.878242
Q9UPN4-2;Q9UPN4;I3L2J8;Q9UPN4-3;I3L2X7;I3L4M5;I3L316	Q9UPN4-2;Q9UPN4;I3L2J8;Q9UPN4-3	Centrosomal protein of 131 kDa	CEP131			0.397808	0.848964	27	27	27	28.7	121.85	96.025	-0.0229005	0.136323	0.787265	0.690544
Q86WQ0;Q86WQ0-2;U3KQ53;F5H0B6	Q86WQ0;Q86WQ0-2	Nuclear receptor 2C2-associated protein	NR2C2AP			0.397772	0.477129	5	5	5	51.8	15.876	17.29	-0.129481	0.014641	1.39851	0.307412
Q9UK76;J3KT51;Q9UK76-2;Q9UK76-3;J3KSH8;F2Z3M5	Q9UK76;J3KT51;Q9UK76-2;Q9UK76-3	Hematological and neurological expressed 1 protein;Hematological and neurological expressed 1 protein, N-terminally processed	HN1			0.397431	0.580637	9	9	9	79.9	16.014	125.76	-0.0234682	-0.17656	0.899098	0.890653
P23634-7;P23634-6;P23634-8;P23634;P23634-5;P23634-4;P23634-3;P23634-2	P23634-7;P23634-6;P23634-8;P23634;P23634-5;P23634-4;P23634-3;P23634-2	Plasma membrane calcium-transporting ATPase 4	ATP2B4			0.39728	0.345323	23	13	12	25.1	132.59	78.05	-0.293724	-0.494068	1.09356	1.28335
P78330;C9JBI3;C9JEJ7;F8WD74	P78330;C9JBI3	Phosphoserine phosphatase	PSPH			0.395899	0.58233	16	16	16	75.6	25.007	90.632	-0.165815	-0.0307076	0.926227	0.853892
Q6ZRP7;A0A087X176;H0Y430	Q6ZRP7;A0A087X176	Sulfhydryl oxidase 2;Sulfhydryl oxidase	QSOX2			0.395877	0.93061	16	16	16	29.8	77.528	74.102	0.181787	0.00173014	0.631151	0.768838
O14713;C9JBU8;A8MPU2;O14713-2;C9J6Y2;C9J0J6;C9JZ07;G3V1A3;C9J5T5	O14713;C9JBU8;A8MPU2;O14713-2	Integrin beta-1-binding protein 1	ITGB1BP1			0.395455	1.28451	3	3	3	17	21.782	7.9812	0.451406	0.153935	0.251083	0.725398
I3L448;Q5TC12;H0YD21;A8MRA7;Q5TC12-2;H0YEW4;H0YDD6;H0YCA6	I3L448;Q5TC12;H0YD21;A8MRA7;Q5TC12-2;H0YEW4	ATP synthase mitochondrial F1 complex assembly factor 1	ATPAF1			0.395047	1.18162	7	7	1	26.8	38.861	32.376	0.115332	0.196481	0.615793	0.652584
J3KTE1;Q8WU67;J3KSP1;J3QQR0	J3KTE1;Q8WU67;J3KSP1	Phospholipase ABHD3	ABHD3			0.393817	0.43576	7	7	7	31.5	40.393	41.607	-0.104068	-0.34806	0.804797	1.2226
C9JCS7	C9JCS7		WDR26		+	0.392219	2.15469	8	3	1	78.6	14.499	8.0041	0.276345	0.461633	0.522056	0.308841
P53814-5;P53814;P53814-6;A0A087WVP4;A0A087X1R1;P53814-2;H7C372;C9JGQ0;C9JQZ8;H7BZZ8;A0A096LNK9;B5MCI0	P53814-5;P53814;P53814-6;A0A087WVP4;A0A087X1R1	Smoothelin	SMTN			0.389298	0.497883	11	11	11	17.5	98.918	43.3	0.0932941	-0.372393	0.767655	1.06864
Q9BSF4;K7ENF5	Q9BSF4	Uncharacterized protein C19orf52	C19orf52			0.389107	1.25472	9	9	9	41.2	29.233	58.219	0.476177	0.705845	0.130404	0.244002
J3KMZ9;H0YMD1;P01130-2;P01130-3;P01130-6;P01130-4;P01130-5;P01130;H0YM92;H0YMQ3	J3KMZ9;H0YMD1;P01130-2;P01130-3;P01130-6;P01130-4;P01130-5;P01130;H0YM92	Low-density lipoprotein receptor	LDLR			0.38554	0.403514	6	6	6	9.6	104.56	28.67	0.0198138	-0.537822	1.01593	1.04424
Q8TDW0;M0R3C1;M0QZ48;Q6NSJ5	Q8TDW0	Volume-regulated anion channel subunit LRRC8C	LRRC8C			0.384324	0.742687	10	9	9	17.7	92.448	19.175	-0.086512	0.100036	0.7554	0.768371
P35610;B1APM4;P35610-3;P35610-2	P35610;B1APM4;P35610-3;P35610-2	Sterol O-acyltransferase 1	SOAT1			0.384258	0.653784	6	6	6	16	64.734	202.37	0.178976	-0.195385	0.597793	0.955648
Q9ULI0-2;Q9ULI0;H7BYF1;C9J1G9;C9JG15	Q9ULI0-2;Q9ULI0;H7BYF1	ATPase family AAA domain-containing protein 2B	ATAD2B			0.382321	0.867077	12	10	10	9.6	164.33	22.015	0.100237	0.015783	0.74442	0.668845
Q03169;H0YLC0;H0YKI8;H0YKR7	Q03169	Tumor necrosis factor alpha-induced protein 2	TNFAIP2			0.380474	0.588741	13	13	13	25.2	72.66	37.06	-0.067088	-0.112459	0.783163	0.918279
F6XHT0;Q9Y6D0;F8WAX7	F6XHT0;Q9Y6D0	Selenoprotein K	SELK			0.379963	0.751969	3	3	3	28	10.495	17.571	0.83295	-0.162073	0.594357	0.254616
Q13077;Q13077-2	Q13077;Q13077-2	TNF receptor-associated factor 1	TRAF1			0.379942	0.681978	6	6	6	18.5	46.163	17.098	0.00166005	-0.0632735	0.791272	0.79011
O60669;F8W0N3;F8VS95	O60669;F8W0N3	Monocarboxylate transporter 2	SLC16A7			0.379798	0.773942	4	4	4	12.6	52.2	19.221	-0.0270125	0.101112	0.882682	0.56241
Q96AJ9-1;Q96AJ9	Q96AJ9-1;Q96AJ9	Vesicle transport through interaction with t-SNAREs homolog 1A	VTI1A			0.379184	0.662349	8	8	8	51.2	23.435	82.004	-0.18002	0.153676	0.915253	0.627828
G3XAG1;Q96ME7-2;Q96ME7-3;Q96ME7	G3XAG1;Q96ME7-2;Q96ME7-3;Q96ME7	Zinc finger protein 512	ZNF512			0.379175	0.513959	5	5	5	14.8	64.594	21.863	0.641019	-0.507316	0.479231	0.903765
Q5JSP0;Q5JSP0-3;Q5JSP0-2;P98174	Q5JSP0;Q5JSP0-3;Q5JSP0-2	FYVE, RhoGEF and PH domain-containing protein 3	FGD3			0.378707	0.899997	25	25	24	44.8	79.4	141.41	0.12614	0.0204844	0.61504	0.753166
P00167-2;P00167;P00167-3;J3KNC7	P00167-2;P00167;P00167-3	Cytochrome b5	CYB5A			0.378705	1.12378	4	4	4	58.2	11.268	48.407	0.196376	0.0784732	0.609377	0.630595
B7Z3L0;Q96AX2;Q96AX2-3;A8MTC6;A8MZI4;Q96AX2-4;Q96AX2-2;A8MSP2;Q9ULW5-2;Q9ULW5	B7Z3L0;Q96AX2;Q96AX2-3;A8MTC6;A8MZI4;Q96AX2-4;Q96AX2-2;A8MSP2	Ras-related protein Rab-37	RAB37			0.378322	0.949661	11	11	11	60.7	22.149	19.668	0.0866758	0.117961	0.511063	0.797589
P30793;P30793-3;P30793-2;P30793-4	P30793	GTP cyclohydrolase 1	GCH1			0.377904	0.609218	4	4	4	14.4	27.903	5.1253	0.0734844	-0.158284	1.016	0.580418
Q05397-7;Q05397;Q05397-5;H0YBP1;E7ESA6;Q05397-2;E9PEI4;H0YB16;H0YBZ1;B4DWJ1;Q05397-6;E5RHD8;Q05397-4;Q05397-3;E5RI03;H0YB99;E5RJP0;E5RIK4;E5RG54;E5RH48;E5RH01;E5RG66;E5RI72;E5RFW9;E5RGA6;E5RJI4;E5RH08;E5RJQ2;E5RG80	Q05397-7;Q05397;Q05397-5;H0YBP1;E7ESA6;Q05397-2;E9PEI4;H0YB16;H0YBZ1;B4DWJ1;Q05397-6	Focal adhesion kinase 1	PTK2			0.376976	0.714097	18	17	17	21.5	114.25	53.339	-0.111966	0.132906	0.889863	0.597103
Q9UFG5;E7EP72;K7EK56;Q9UFG5-2;K7ER12;K7EQW1;A0A087WUU5;K7ELZ1	Q9UFG5;E7EP72;K7EK56;Q9UFG5-2	UPF0449 protein C19orf25	C19orf25			0.37543	0.981	4	4	4	61	12.878	29.284	0.548206	0.116365	NaN	0.46172
D6REQ6;D6RHI9;A0A087WZM2;O00584;H0YAE9	D6REQ6;D6RHI9;A0A087WZM2;O00584;H0YAE9	Ribonuclease T2	RNASET2			0.375257	0.7193	7	7	7	25.2	25.308	167.46	0.956152	0.492417	0.0524158	4.3339e-05
Q9NXD2;H3BUZ0;Q9NXD2-2;H3BUS9;Q9NXD2-3	Q9NXD2	Myotubularin-related protein 10	MTMR10		+	0.37504	2.65197	6	6	6	10.3	88.272	18.571	0.295093	0.324696	0.438932	0.441438
Q7L1W4;E9PMF9	Q7L1W4	Volume-regulated anion channel subunit LRRC8D	LRRC8D			0.374112	0.582873	22	22	22	31	98.2	75.767	-0.0939657	-0.0961134	0.823505	0.863021
Q9BZ29-4;A0A088AWN3;A0A0A0MRA7;Q9BZ29-3;Q9BZ29;A0A0A0MSY4;Q9BZ29-5;A0A0A0MT38;Q9BZ29-6;H0Y3S1;A0A0D9SFH5;Q5JUD8;H7BZ79;Q5JUD3;A0A0D9SF41;X6RGR3	Q9BZ29-4;A0A088AWN3;A0A0A0MRA7;Q9BZ29-3;Q9BZ29;A0A0A0MSY4;Q9BZ29-5;A0A0A0MT38;Q9BZ29-6	Dedicator of cytokinesis protein 9	DOCK9			0.37301	0.609319	51	51	46	31.2	238.84	157.06	-0.0698397	-0.0809269	0.786095	0.856711
Q9UQ03-2;Q9UQ03	Q9UQ03-2;Q9UQ03	Coronin-2B	CORO2B		+	0.372676	1.55295	11	11	11	26.1	54.392	41.125	0.233515	0.200002	0.472384	0.584804
Q15067-2;Q15067-3;K7ELT1;I3L0T4;K7ESC7;I3L4S5;K7ENF1;I3L2U4	Q15067-2;Q15067-3	Peroxisomal acyl-coenzyme A oxidase 1	ACOX1			0.372591	1.04642	31	31	2	59.8	74.667	256.98	0.308394	-0.0229472	0.546561	0.658356
F8WCM7;F8VRJ6;F5GZG6;Q9H3S4	F8WCM7;F8VRJ6;F5GZG6;Q9H3S4	Thiamin pyrophosphokinase 1	TPK1			0.372234	0.717474	2	2	2	27.3	14.085	20.719	0.296314	0.0847447	NaN	0.735644
Q9Y289	Q9Y289	Sodium-dependent multivitamin transporter	SLC5A6			0.372103	0.657717	6	6	6	11.7	68.641	15.43	0.167977	-0.137505	0.464877	0.993063
Q7Z2W4;Q7Z2W4-2	Q7Z2W4;Q7Z2W4-2	Zinc finger CCCH-type antiviral protein 1	ZC3HAV1		+	0.371071	1.38132	45	45	1	62	101.43	323.31	0.238885	0.138028	0.521855	0.585518
P40259;P40259-3;P40259-2	P40259;P40259-3	B-cell antigen receptor complex-associated protein beta chain	CD79B			0.370746	0.576462	5	5	5	31	26.048	47.425	-0.00374608	-0.185327	0.815657	0.856398
P08133-2;P08133;E5RK69;E7EMC6;E5RFF0;H0YC77;E5RIU8;E5RJR0;E5RI05;E5RJF5;E5RK63	P08133-2;P08133;E5RK69;E7EMC6	Annexin A6;Annexin	ANXA6		+	0.370602	1.76488	9	9	9	16.1	72.423	15.967	0.402512	0.31603	0.19862	0.565246
Q9C0B1;Q9C0B1-4;Q9C0B1-2;X6R3I0	Q9C0B1	Alpha-ketoglutarate-dependent dioxygenase FTO	FTO			0.37012	0.596395	20	20	20	44.2	58.281	76.113	-0.0805212	-0.0881167	0.841007	0.808109
Q8IUI8;J3KST8;J3QLS9	Q8IUI8	Cytokine receptor-like factor 3	CRLF3			0.36943	0.28105	17	1	1	48.2	49.765	4.9872	0.0336435	-0.245301	NaN	1.31995
Q676U5;E7EVC7;Q676U5-3;Q676U5-2;Q676U5-5;Q676U5-4;C9J1B2;C9JAY7;C9JK97;F8WAF9;C9J8C6	Q676U5;E7EVC7;Q676U5-3;Q676U5-2;Q676U5-5;Q676U5-4	Autophagy-related protein 16-1	ATG16L1		+	0.369247	1.50058	7	7	7	12.2	68.264	8.8705	0.310844	0.140124	0.599318	0.426703
Q9H857-2;Q9H857;Q9H857-3;Q9H857-4;H7C519;H7C4G8	Q9H857-2;Q9H857;Q9H857-3;Q9H857-4	5-nucleotidase domain-containing protein 2	NT5DC2			0.369117	0.619918	12	12	12	27.6	64.144	45.932	0.152292	-0.222178	0.62854	0.917815
Q96BX8;K7EPX7;K7EKK6;K7ELS3;K7ESA9;K7ESI3;Q86TA1	Q96BX8;K7EPX7;K7EKK6;K7ELS3;K7ESA9	MOB kinase activator 3A	MOB3A		+	0.368867	1.83487	6	6	6	23	25.464	10.312	0.2257	0.305562	0.379621	0.564585
Q86VZ1	Q86VZ1	P2Y purinoceptor 8	P2RY8			0.368504	1.13359	3	3	3	10.3	40.635	28.877	0.204881	0.0837921	0.677801	0.507542
Q9H0H5;F8VRD2;H0YIK5;F8VWX0;F8W0L1;F8VZ66;F8VV47;F8VWY4;F8VVE5;F8VUW9;F8VV39;F8VS54;F8VRL2;F8VVY0;F8VXH1;F8W1E5;F8VQF5;F8VYH6;F8VZ41;F8VQZ5;F8W1T4;F8VV37	Q9H0H5	Rac GTPase-activating protein 1	RACGAP1			0.368351	0.799631	17	17	17	31.5	71.026	47.098	0.203651	-0.111757	0.665575	0.715936
P08473;C9JR96;C9J9X7;C9IYX7;C9JDZ3;A0A087WWM7;Q3KQS6	P08473	Neprilysin	MME			0.366537	0.329378	38	38	38	55.7	85.513	323.31	-0.304861	-0.489281	1.09586	1.16443
E9PJB8;E9PN30;Q9BQE4	E9PJB8;E9PN30;Q9BQE4	Selenoprotein S	VIMP			0.365434	0.621533	4	4	4	29.5	18.494	111.65	0.0529099	-0.127368	0.566377	0.969819
Q92611;Q92611-2	Q92611;Q92611-2	ER degradation-enhancing alpha-mannosidase-like protein 1	EDEM1			0.365329	0.67218	7	7	7	12.2	73.767	9.6907	0.0449997	-0.060939	0.939076	0.538178
P11216;H0Y4Z6	P11216	Glycogen phosphorylase, brain form	PYGB			0.364914	0.887229	53	53	42	63.8	96.695	323.31	0.105877	0.0182068	0.652876	0.682696
O43374;E7ERK1;O43374-2;H0YB35	O43374;E7ERK1;O43374-2	Ras GTPase-activating protein 4	RASA4			0.363698	0.770438	31	31	1	48.4	90.457	202.98	0.0144704	0.0329472	0.586885	0.820489
K7ELD9;K7ENG9;O43760;O43760-2;K7ELS8	K7ELD9;K7ENG9;O43760;O43760-2;K7ELS8	Synaptogyrin-2	SYNGR2		+	0.363691	1.34421	4	4	4	44.6	6.7436	6.6464	0.194179	0.155231	0.531069	0.574283
P23458	P23458	Tyrosine-protein kinase JAK1	JAK1			0.363282	0.795807	36	36	35	38	133.28	114.22	0.17612	-0.0837527	0.574538	0.786223
Q5NDL2-3;Q5NDL2;C9J4G5;C9JQM7;F5H225;Q5NDL2-2	Q5NDL2-3;Q5NDL2;C9J4G5;C9JQM7;F5H225;Q5NDL2-2	EGF domain-specific O-linked N-acetylglucosamine transferase	EOGT			0.362982	0.194078	3	3	3	7.4	52.296	3.4224	-0.0233263	-0.544856	NaN	1.65713
Q16706	Q16706	Alpha-mannosidase 2	MAN2A1			0.360714	0.997956	28	28	28	31	131.14	231.97	0.242431	0.00374607	0.478299	0.718379
Q14005-3;Q14005-2;Q14005;H0YLH9;Q14005-4	Q14005-3;Q14005-2;Q14005;H0YLH9;Q14005-4	Pro-interleukin-16;Interleukin-16	IL16		+	0.36016	2.83199	24	24	24	45.2	66.646	130.79	0.326226	0.288063	0.421587	0.404764
I3L072;Q9BSJ5-2;Q9BSJ5-3;Q9BSJ5;J3KTJ7;J3KT60	I3L072;Q9BSJ5-2;Q9BSJ5-3;Q9BSJ5	Uncharacterized protein C17orf80	C17orf80			0.359644	0.60485	9	9	9	23.8	60.833	35.224	0.0605327	-0.179645	0.659285	0.898404
Q9HBH0;V9GY67;Q9HBH0-2;V9GYQ1;F5GXB1;V9GYB3	Q9HBH0;V9GY67;Q9HBH0-2	Rho-related GTP-binding protein RhoF	RHOF			0.357368	1.0084	8	8	8	38.4	23.625	33.222	0.168025	0.0343565	0.626205	0.600884
K7EM38;I3L3R2;J3KT65;F8WCH0	K7EM38;I3L3R2;J3KT65		ACTG1			0.3568	1.16287	14	2	1	91.7	14.522	122.2	0.0926478	0.207143	0.66175	0.465659
Q9Y572;Q9Y572-3;Q9Y572-2;H0YJN5;G3V2L1	Q9Y572;Q9Y572-3;Q9Y572-2	Receptor-interacting serine/threonine-protein kinase 3	RIPK3			0.35625	0.45779	7	7	7	25.1	56.887	23.455	0.523919	-0.214475	NaN	0.759307
Q99575;E5RK39	Q99575	Ribonucleases P/MRP protein subunit POP1	POP1			0.354092	1.0268	30	30	30	42.2	114.71	185.57	0.282719	-0.00728955	0.45386	0.687079
Q9HC21;Q9HC21-2;J3KRY6;J3QLV3;J3KSI7;J3QL84;J3KS44;J3KSB1;J3KTL0;J3QS02	Q9HC21;Q9HC21-2	Mitochondrial thiamine pyrophosphate carrier	SLC25A19		+	0.353827	1.50635	15	15	15	38.1	35.511	45.752	0.403275	0.190678	0.22848	0.592876
J3KQA9;Q5JR59;Q5JR59-4;Q5JR59-3	J3KQA9;Q5JR59;Q5JR59-4;Q5JR59-3	Microtubule-associated tumor suppressor candidate 2	MTUS2			0.353569	0.352074	4	4	4	3.6	151.17	8.8184	0.992718	-0.30349	NaN	0.371478
Q8IXM3	Q8IXM3	39S ribosomal protein L41, mitochondrial	MRPL41			0.352492	0.59046	6	6	6	62.8	15.383	18.781	0.102574	-0.200382	0.562279	0.945499
F5H8L4;C9JBG5;Q8NBJ9;Q8NBJ9-2;E9PMC3	F5H8L4;C9JBG5;Q8NBJ9;Q8NBJ9-2;E9PMC3	SID1 transmembrane family member 2	SIDT2			0.352092	0.738125	3	3	3	3.5	94.065	5.5463	0.509266	NaN	0.00158601	0.545424
P15391;P15391-2;A0A087WXJ7	P15391;P15391-2;A0A087WXJ7	B-lymphocyte antigen CD19	CD19		+	0.351928	2.21772	9	9	9	20.3	61.128	27.336	0.396479	0.212881	0.448161	0.350191
H0YKM4;Q86X40-3;Q86X40;H0YM85;Q86X40-2	H0YKM4;Q86X40-3;Q86X40;H0YM85;Q86X40-2	Leucine-rich repeat-containing protein 28	LRRC28			0.350714	0.326974	4	4	4	15.9	34.279	2.9856	-0.0332292	-0.514305	0.472488	1.4779
Q93096;A0A0D9SGK2	Q93096;A0A0D9SGK2	Protein tyrosine phosphatase type IVA 1	PTP4A1			0.350678	0.863005	5	2	2	32.9	19.815	6.899	0.136664	-0.0264696	0.641454	0.651065
Q14651;C9JAM8;C9J359;C9J0F3;C9JU08;C9JAM3;C9JVY2;C9JYI1	Q14651	Plastin-1	PLS1			0.350651	0.438512	21	19	17	45.6	70.253	115.94	-0.197614	-0.230888	1.01471	0.816393
P20273;P20273-4;P20273-3;P20273-5;A0A0C4DH08;P20273-2;M0R3H1;M0R1M2;A0A087WZQ4;M0R0R6;M0QY14;M0QYP4;M0R2M0;M0R2R8;M0QY05;M0QZR7;M0QZ01	P20273;P20273-4;P20273-3;P20273-5;A0A0C4DH08;P20273-2	B-cell receptor CD22	CD22		+	0.34974	1.31584	18	18	18	26.1	95.347	115.93	0.304701	0.0619835	0.496922	0.535353
Q9Y5W9-2;Q9Y5W9;J3QRB9;J3KTN6;J3QLV8;B4DJI7	Q9Y5W9-2;Q9Y5W9;J3QRB9;J3KTN6;J3QLV8	Sorting nexin-11	SNX11			0.348993	0.497692	4	4	4	21	29.423	16.928	0.393785	-0.176283	0.0280033	1.15047
Q9UBR2	Q9UBR2	Cathepsin Z	CTSZ			0.348393	1.11582	6	6	6	22.4	33.868	22.159	0.229974	0.0340749	0.563744	0.56578
Q6UWP2;A0A087WZN3;Q6UWP2-2;A0A087X0R1;A0A087WYV4	Q6UWP2;A0A087WZN3;Q6UWP2-2	Dehydrogenase/reductase SDR family member 11	DHRS11			0.348185	0.290603	5	5	5	25	28.308	13.67	-0.377179	-0.539373	1.27935	1.02994
Q5TEU4;B3KR61;Q5TEU4-2	Q5TEU4;B3KR61;Q5TEU4-2	NADH dehydrogenase [ubiquinone] 1 alpha subcomplex assembly factor 5	NDUFAF5			0.345193	0.718578	8	8	8	35.4	38.918	29.458	0.231193	-0.186951	0.651959	0.684573
Q8NEM2	Q8NEM2	SHC SH2 domain-binding protein 1	SHCBP1			0.343331	0.595589	9	9	9	21.1	75.69	49.857	0.261258	-0.296385	0.568908	0.839544
Q15057;A0A087X1H5;H7C3Q8;H7C3K3;C9J8L1;F8WAU0;Q96P50-4;Q96P50-1;Q96P50	Q15057;A0A087X1H5	Arf-GAP with coiled-coil, ANK repeat and PH domain-containing protein 2	ACAP2		+	0.34292	2.35147	32	31	31	46.3	88.028	209.96	0.35078	0.371503	0.429321	0.220076
Q9NW68-8;Q9NW68-2;Q9NW68;Q9NW68-7;Q9NW68-3;Q9NW68-9;E9PS77;F8W6C6;E9PNA9;E9PQA7;Q9NW68-5;Q9NW68-4	Q9NW68-8;Q9NW68-2;Q9NW68;Q9NW68-7;Q9NW68-3;Q9NW68-9;E9PS77;F8W6C6;E9PNA9;E9PQA7;Q9NW68-5;Q9NW68-4	BSD domain-containing protein 1	BSDC1			0.342648	0.661155	6	6	6	18.7	41.411	20.532	-0.155749	0.388355	0.90889	0.229095
Q9Y6B6;Q9H029;D6RD69;D6R9R5;D6RDB2;D6RAA2	Q9Y6B6;Q9H029;D6RD69;D6R9R5	GTP-binding protein SAR1b	SAR1B;DKFZp434B2017			0.341511	1.20134	14	10	10	77.8	22.41	211.53	0.286287	0.0427844	0.439783	0.597191
Q15149;Q15149-7;Q15149-8;Q15149-9;Q15149-5;Q15149-4;Q15149-6;Q15149-3;Q15149-2;E9PMV1;H0YDN1;E9PKG0;A0A075B730;A0A087X1U6;P58107;E9PIA2;E9PQ28	Q15149;Q15149-7;Q15149-8;Q15149-9;Q15149-5;Q15149-4;Q15149-6;Q15149-3;Q15149-2	Plectin	PLEC			0.339941	1.01657	219	219	216	50.6	531.78	323.31	0.123968	0.0661237	0.590722	0.578952
Q07617;Q07617-2	Q07617	Sperm-associated antigen 1	SPAG1			0.33978	0.188602	3	3	3	3.7	103.64	1.9202	-0.328836	-0.267774	NaN	1.61595
P01591;D6RD17;D6RHJ6;C9JA05	P01591;D6RD17;D6RHJ6	Immunoglobulin J chain	IGJ;JCHAIN			0.339525	0.714344	7	7	7	42.8	18.098	22.973	0.242823	-0.171043	0.501414	0.784906
F5GXE4;O95260-2;B4E107	F5GXE4;O95260-2;B4E107	Arginyl-tRNA--protein transferase 1	ATE1			0.338541	0.616091	7	7	1	20	58.13	40.375	0.0425162	-0.0381248	0.362442	0.987331
P03905	P03905	NADH-ubiquinone oxidoreductase chain 4	MT-ND4			0.338239	1.03594	3	3	3	6.3	51.58	10.536	0.369967	0.14104	0.124328	0.717619
P40222	P40222	Alpha-taxilin	TXLNA			0.337756	0.560346	24	24	24	54.2	61.89	313.42	-0.0963969	-0.103163	0.832607	0.717975
Q96PZ2;E9PNQ0;E9PR18	Q96PZ2	Protein FAM111A	FAM111A			0.337326	0.791714	11	11	11	24.5	70.195	48.207	0.204599	-0.106405	0.529071	0.722039
Q9Y4E8;Q9Y4E8-2;Q9Y4E8-3;Q9Y4E8-4;H0YI31;F8W0H4;F8VZG8;F8VVY7;H0YHM4;H0YI26;H0YH96	Q9Y4E8;Q9Y4E8-2;Q9Y4E8-3	Ubiquitin carboxyl-terminal hydrolase 15	USP15			0.336975	0.922132	46	46	44	51.9	112.42	284.97	0.0208965	0.117828	0.62742	0.581756
P42785;P42785-2;E9PIG4;E9PQB5;E9PL85;E9PQN3;E9PKN6;E9PNF7;E9PLY4;E9PNJ1;E9PL49;E9PR42	P42785;P42785-2;E9PIG4;E9PQB5;E9PL85;E9PQN3;E9PKN6	Lysosomal Pro-X carboxypeptidase	PRCP		+	0.336549	2.35485	10	10	10	23.8	55.799	81.218	0.419372	0.253626	0.270589	0.402607
O75746;O75746-2;F8W9J0;H0YFB2;B4DGK6	O75746;O75746-2	Calcium-binding mitochondrial carrier protein Aralar1	SLC25A12		+	0.335861	1.55617	40	40	30	69.6	74.761	213.62	0.364218	0.122209	0.327342	0.529677
Q92844;E7EQA9;H7C3L4;E7EV32;E7EMT6;E7ENY2;E7EVA2;E7EW82;E7EWR8;E7EM55;E7ERM9;Q92844-2;Q92844-3;H7BZ28;E9PEK1	Q92844;E7EQA9;H7C3L4	TRAF family member-associated NF-kappa-B activator	TANK			0.335193	1.09201	17	17	17	48.2	47.815	191.13	0.0151702	0.250719	0.605494	0.46939
B4E1Q4;O14730-2;O14730;J3QQL5	B4E1Q4;O14730-2;O14730	Serine/threonine-protein kinase RIO3	RIOK3			0.334691	0.502188	8	8	8	23.9	57.474	23.727	0.148769	-0.272297	0.408168	1.05412
O76024;H0Y9G5	O76024	Wolframin	WFS1			0.331315	0.954711	6	6	6	6.9	100.29	9.1654	0.483501	0.0930192	NaN	0.417425
J3KQL8	J3KQL8		APOL2			0.330051	0.549213	11	11	1	29	48.915	41.08	-0.0740944	-0.139267	0.773406	0.760162
Q9C0D3;A8DPD7;Q9C0D3-2	Q9C0D3;A8DPD7	Protein zyg-11 homolog B	ZYG11B			0.328367	0.831726	8	8	8	16.3	83.92	16.812	0.680313	0.544485	0.118227	-0.0295589
P08183-2;P08183;P21439-3;P21439-2;H7C0M2	P08183-2;P08183	Multidrug resistance protein 1	ABCB1			0.328354	0.518373	25	25	20	25.7	134.03	148.19	-0.124593	-0.135855	0.797262	0.776602
P11912;M0QX61;P11912-2	P11912	B-cell antigen receptor complex-associated protein alpha chain	CD79A			0.32765	1.1545	5	5	5	28.8	25.038	230.19	0.104527	0.151989	0.460795	0.593289
A6NHZ5	A6NHZ5	Leucine-rich repeat-containing protein 14B	LRRC14B			0.327628	0.461912	15	15	15	35.8	56.757	50.177	-0.0666748	-0.28186	0.810566	0.848479
Q14209;A0A087X0B6	Q14209	Transcription factor E2F2	E2F2		+	0.324899	1.75621	4	4	3	8.5	47.505	7.4388	0.177898	0.319618	0.50711	0.294969
O95273;O95273-2;H3BR23;H3BUF4;H3BQA6;REV__Q8N4P3;O95273-3;Q9Y2K3	O95273;O95273-2;H3BR23	Cyclin-D1-binding protein 1	CCNDBP1			0.323916	0.268489	6	6	6	23.1	40.262	8.9632	0.00637642	-0.229518	NaN	1.19489
P51580	P51580	Thiopurine S-methyltransferase	TPMT			0.323738	1.03515	14	14	14	58.8	28.18	62.57	0.208778	0.00475299	0.512884	0.568537
Q5JRX3;Q5JRX3-2;Q5JRX3-3;A0A0A0MRX9;H0Y4F7;B1APQ0;H0Y7L7;B1APQ1	Q5JRX3;Q5JRX3-2;Q5JRX3-3;A0A0A0MRX9	Presequence protease, mitochondrial	PITRM1			0.323355	0.6834	53	53	53	61.4	117.41	323.31	0.130239	-0.135364	0.53047	0.768076
Q08722-2;Q08722-3;Q08722-4;Q08722	Q08722-2;Q08722-3;Q08722-4;Q08722	Leukocyte surface antigen CD47	CD47			0.322112	0.646509	3	3	3	9.6	31.742	3.4691	-0.0536674	-0.0357271	0.694568	0.683275
Q8NDZ4;E7ET39;Q8NDZ4-2;C9JY09	Q8NDZ4;E7ET39;Q8NDZ4-2	Deleted in autism protein 1	C3orf58			0.321431	1.18349	7	7	7	20.5	49.481	24.576	0.160847	0.0961269	0.479024	0.549726
Q01581;D6RIW1;P54868-3;P54868-2;P54868	Q01581	Hydroxymethylglutaryl-CoA synthase, cytoplasmic	HMGCS1		+	0.320684	1.41479	31	31	31	73.7	57.293	323.31	0.559919	0.245982	0.344147	0.132689
O00522;O00522-3;A0A0B4J2C7;A0A0C4DG23;O00522-2;C9J718;C9JF32;C9JBN7;C9JEW7;C9JJM9;C9JD81;C9J3W7;C9JIY2;C9JI47;C9JXI9;C9JSG7	O00522;O00522-3;A0A0B4J2C7;A0A0C4DG23;O00522-2	Krev interaction trapped protein 1	KRIT1			0.320183	1.06109	16	16	16	31.1	84.347	82.797	0.254616	-0.000837024	0.432639	0.594313
Q9NZJ5;E7ER02;C9J185	Q9NZJ5;E7ER02;C9J185	Eukaryotic translation initiation factor 2-alpha kinase 3	EIF2AK3			0.319836	0.897333	24	24	24	27.6	125.21	72.192	0.207961	-0.060307	0.581881	0.54981
B4DZS0;O76075;O76075-2;J3KT26;Q96P72;A0A0B4J1S5;G3XAD0;Q96P73;O76075-4;O76075-3	B4DZS0;O76075;O76075-2	DNA fragmentation factor subunit beta	DFFB			0.319636	0.729292	6	6	6	24	41.956	12.62	-0.032242	0.0309717	0.573375	0.706441
Q02241;H7BYN4;Q02241-2;Q02241-3;H0YME6;H0YKQ5;H0YMJ4	Q02241;H7BYN4;Q02241-2;Q02241-3	Kinesin-like protein KIF23;Kinesin-like protein	KIF23			0.319617	1.19939	17	17	17	20.6	110.06	77.634	0.322415	0.0684644	0.280719	0.606869
P55210;P55210-3;A0A0A0MRL7;P55210-4;Q5SVL2	P55210;P55210-3;A0A0A0MRL7;P55210-4;Q5SVL2	Caspase-7;Caspase-7 subunit p20;Caspase-7 subunit p11	CASP7			0.319459	0.576998	11	11	7	35.6	34.276	43.768	-0.141694	-0.0210868	0.768671	0.671945
P02786;G3V0E5;H7C3V5;F8WBE5;Q9UP52-2	P02786;G3V0E5	Transferrin receptor protein 1;Transferrin receptor protein 1, serum form	TFRC			0.318924	0.577965	42	42	41	55.5	84.87	323.31	0.0157388	-0.172815	0.696528	0.736244
Q5SR50;F8W9P4;O00329;O00329-2	Q5SR50;F8W9P4;O00329	Phosphatidylinositol 4,5-bisphosphate 3-kinase catalytic subunit delta isoform	PIK3CD			0.318311	0.872407	22	22	21	23.2	121.83	54.623	-0.0110662	0.115832	0.611361	0.557115
Q12882;Q12882-2	Q12882	Dihydropyrimidine dehydrogenase [NADP(+)]	DPYD			0.317486	0.453506	5	5	5	5.2	111.4	3.6038	0.662643	0.49057	NaN	-0.200755
Q9Y5U8;A0A087WVZ0;Q5TI65	Q9Y5U8;A0A087WVZ0;Q5TI65	Mitochondrial pyruvate carrier 1	MPC1;BRP44L			0.315154	0.587507	4	4	4	60.6	12.347	6.0965	0.706794	0.0359054	0.202763	NaN
Q92636;Q92636-2	Q92636;Q92636-2	Protein FAN	NSMAF			0.314427	0.981585	7	7	7	9.7	104.37	17.677	0.23669	-0.0232697	0.431142	0.613145
J3QKL0;Q8WVB3;Q8WVB3-2;J3KRH3;J3QKU6;K7EIV9	J3QKL0;Q8WVB3;Q8WVB3-2;J3KRH3	Hexosaminidase D	HEXDC			0.314419	0.781592	3	3	3	7.9	58.41	3.9342	0.0705878	-0.0315921	0.572502	0.64618
A0A087WW23;P20292	A0A087WW23;P20292	Arachidonate 5-lipoxygenase-activating protein	ALOX5AP			0.314203	0.84299	3	3	3	13.8	24.208	5.1866	0.210296	-0.0855274	0.502432	0.629612
A0A0A0MQZ4;Q8N3J5;V9GYI6;V9GYS8;V9GY69;V9GYZ5;Q8N3J5-3;Q8N3J5-2	A0A0A0MQZ4;Q8N3J5;V9GYI6;V9GYS8;V9GY69;V9GYZ5;Q8N3J5-3;Q8N3J5-2	Protein phosphatase 1K, mitochondrial	PPM1K			0.313749	0.605463	4	4	4	11.3	35.988	6.7466	0.0530595	0.694122	NaN	0.194064
Q8WVV4;Q8WVV4-1;Q8WVV4-3	Q8WVV4;Q8WVV4-1;Q8WVV4-3	Protein POF1B	POF1B			0.313604	0.254051	5	5	5	11.7	68.064	16.709	-0.180275	-0.088807	NaN	1.20989
Q86VR2;K7ENZ6;K7EMF4;K7ELM8;K7EJ34;K7ENF4;K7EPD0;K7EJ42;K7EQI9	Q86VR2;K7ENZ6;K7EMF4;K7ELM8;K7EJ34;K7ENF4	Protein FAM134C	FAM134C			0.313493	0.685432	5	5	5	17.4	51.396	25.855	-0.094236	0.0901759	0.485427	0.772604
Q9H061;E9PI90;Q9H061-2;E9PIH8	Q9H061;E9PI90	Transmembrane protein 126A	TMEM126A		+	0.311917	1.49757	8	8	8	37.9	21.527	23.28	0.463867	0.125122	0.224781	0.433896
Q4G0N4;Q4G0N4-2;Q4G0N4-3;B7Z8V7;A0A0C4DGV3;H0Y9H7;D6RHI4	Q4G0N4;Q4G0N4-2;Q4G0N4-3;B7Z8V7	NAD kinase 2, mitochondrial	NADK2			0.31186	0.783049	19	19	19	57.5	49.432	123.59	0.734131	0.415434	-0.0547369	0.152612
P09211;A8MX94;A0A087X2E9;A0A087X243	P09211;A8MX94	Glutathione S-transferase P	GSTP1		+	0.310971	1.49759	18	18	18	71	23.356	323.31	0.114941	0.261471	0.500598	0.366876
Q96TC7;H0YLG5;H0YMB1;Q96TC7-2;H0YNE5	Q96TC7;H0YLG5;H0YMB1;Q96TC7-2	Regulator of microtubule dynamics protein 3	RMDN3			0.310478	0.974068	11	11	11	27	52.118	45.159	0.130982	0.0779266	0.358734	0.674268
O15031;E2PU09;A6QRG9;A0A087WU36;A6QRH1;H0Y7X5;H0Y6J7;H0YAM9;F5H3A2;Q9Y4D7	O15031	Plexin-B2	PLXNB2			0.31045	0.901135	41	41	40	29.3	205.12	323.31	0.057767	0.0532504	0.575215	0.555566
Q9BXL7;H7BY05	Q9BXL7	Caspase recruitment domain-containing protein 11	CARD11		+	0.309511	2.14264	12	12	12	13.7	133.28	17.656	0.221169	0.236707	0.407625	0.372543
Q13057;Q13057-2;K7EN91;K7ES73;K7EP09;K7EQ60;K7ESK6;K7EPT0;K7EPC2	Q13057;Q13057-2	Bifunctional coenzyme A synthase;Phosphopantetheine adenylyltransferase;Dephospho-CoA kinase	COASY			0.309237	0.487333	23	23	23	52.1	62.328	165.22	-0.147307	-0.147346	0.746571	0.78503
Q15025-4;Q15025;A0A0A0MRZ4;Q15025-7;Q15025-8;Q15025-5;Q15025-6;Q15025-3;Q15025-2;E7EMV7;E7EW15;H0YC17;E7EWG2;E7EW68	Q15025-4;Q15025;A0A0A0MRZ4;Q15025-7;Q15025-8;Q15025-5;Q15025-6;Q15025-3;Q15025-2;E7EMV7	TNFAIP3-interacting protein 1	TNIP1			0.30907	0.771952	20	20	20	41.4	64.499	88.968	0.00919031	0.0371714	0.483055	0.706865
Q9Y303;Q9Y303-2;Q9Y303-3;H3BQ15;H3BTZ6;H3BSV9;H3BSD5;H3BT49;H3BTE3	Q9Y303;Q9Y303-2;Q9Y303-3;H3BQ15	Putative N-acetylglucosamine-6-phosphate deacetylase	AMDHD2			0.308959	0.663079	11	11	11	42.8	43.747	54.165	0.747415	0.499068	-0.157447	0.146803
Q13501;Q13501-2;E7EMC7;E9PFW8;C9JRJ8;E3W990	Q13501;Q13501-2;E7EMC7	Sequestosome-1	SQSTM1			0.308749	0.433254	12	12	12	47.5	47.687	156.27	0.151378	-0.407287	0.512783	0.978122
O95470;H0Y3V8;H7BXL7	O95470	Sphingosine-1-phosphate lyase 1	SGPL1			0.30811	0.612312	14	14	14	32.7	63.523	45.885	-0.0471196	-0.0749425	0.679334	0.675166
Q9NZ45	Q9NZ45	CDGSH iron-sulfur domain-containing protein 1	CISD1			0.308101	1.24764	5	5	5	52.8	12.199	98.055	0.262037	0.10809	0.269751	0.592528
Q9H8W4	Q9H8W4	Pleckstrin homology domain-containing family F member 2	PLEKHF2			0.307318	0.733513	6	6	6	25.3	27.797	20.341	0.50541	0.612588	0.306496	-0.195221
P45954;P45954-2	P45954;P45954-2	Short/branched chain specific acyl-CoA dehydrogenase, mitochondrial	ACADSB			0.307179	1.20081	12	12	12	43.1	47.485	50.35	0.201659	0.0728604	0.400538	0.553659
O60825-2;O60825;I1Z9G3;P16118-2;P16118;Q4VBA9;F6RAZ1	O60825-2;O60825	6-phosphofructo-2-kinase/fructose-2,6-bisphosphatase 2;6-phosphofructo-2-kinase;Fructose-2,6-bisphosphatase	PFKFB2			0.307172	1.16227	10	10	7	22.9	54.406	16.635	0.0485763	0.245982	0.577634	0.356495
Q96QD9;Q96QD9-2;Q96QD9-3;H9KVC6;Q96QD9-4;H9KVD1;H9KVC1;H9KVD5	Q96QD9;Q96QD9-2;Q96QD9-3	UAP56-interacting factor	FYTTD1		+	0.30684	1.73697	11	11	11	43.4	35.818	48.461	0.37917	0.432639	0.280838	0.134715
P42575;P42575-2;C9JRR9;A0A087WYM1;P42575-3	P42575;P42575-2	Caspase-2;Caspase-2 subunit p18;Caspase-2 subunit p13;Caspase-2 subunit p12	CASP2			0.305327	0.442755	15	15	15	47.1	50.685	91.879	-0.0950467	-0.269495	0.784169	0.801682
Q9ULC5;Q9ULC5-3;Q9ULC5-4;C9J8C7	Q9ULC5;Q9ULC5-3;Q9ULC5-4	Long-chain-fatty-acid--CoA ligase 5	ACSL5			0.304708	0.616263	23	22	21	43.6	75.99	105.96	-0.051024	-0.0623543	0.618051	0.71416
Q9Y483;Q96G26;Q9Y483-4;B4DZG1;Q9Y483-3;Q9Y483-2	Q9Y483;Q96G26;Q9Y483-4;B4DZG1;Q9Y483-3	Metal-response element-binding transcription factor 2	MTF2			0.304413	0.982105	15	15	15	26.8	67.105	29.037	0.176463	0.0117819	0.419107	0.610301
Q9NP92;A0A087WV52	Q9NP92;A0A087WV52	28S ribosomal protein S30, mitochondrial	MRPS30			0.303798	0.593905	18	18	18	53.8	50.364	88.356	0.0645704	-0.181362	0.609944	0.722039
Q8N6G5;Q8N6G5-2	Q8N6G5;Q8N6G5-2	Chondroitin sulfate N-acetylgalactosaminyltransferase 2	CSGALNACT2		+	0.302864	1.35992	6	6	6	13.5	62.572	10.355	0.465381	0.101247	0.200881	0.443948
A0A0A0MQV2;O75582;O75582-3;O75582-2;G3V2D1;H0YJE1	A0A0A0MQV2;O75582;O75582-3;O75582-2	Ribosomal protein S6 kinase;Ribosomal protein S6 kinase alpha-5	RPS6KA5			0.302362	0.357151	17	17	16	27.8	90.507	58.107	-0.374845	-0.191145	0.889084	0.886353
Q15080;A0A0G2JR51;Q15080-3;Q15080-2;B0QY04	Q15080;A0A0G2JR51;Q15080-3;Q15080-2	Neutrophil cytosol factor 4	NCF4			0.302019	0.743547	21	21	21	62.2	39.031	77.343	0.092971	-0.0638012	0.491084	0.687823
Q2TAA5	Q2TAA5	GDP-Man:Man(3)GlcNAc(2)-PP-Dol alpha-1,2-mannosyltransferase	ALG11			0.301954	0.637954	13	13	13	37.2	55.65	32.981	0.0276455	-0.112834	0.661202	0.631802
Q9NVS9;Q9NVS9-3;Q9NVS9-2;Q9NVS9-4;J3QQV6	Q9NVS9;Q9NVS9-3;Q9NVS9-2;Q9NVS9-4;J3QQV6	Pyridoxine-5-phosphate oxidase	PNPO			0.30111	0.441634	16	16	16	55.6	29.988	240.03	-0.180148	-0.187822	0.823831	0.748578
Q7Z2Z2;Q7Z2Z2-2;H0YK75	Q7Z2Z2;Q7Z2Z2-2	Elongation factor Tu GTP-binding domain-containing protein 1	EFTUD1		+	0.300191	1.73528	41	41	41	43.3	125.43	238.99	0.196442	0.182184	0.407733	0.414403
A0A087WV66;P46013	A0A087WV66;P46013	Antigen KI-67	MKI67			0.29947	0.407735	112	112	7	46	358.62	323.31	0.276887	-0.467454	0.397365	0.991083
Q13595;Q13595-4;Q13595-3;Q13595-2;F8WEH2	Q13595;Q13595-4;Q13595-3;Q13595-2	Transformer-2 protein homolog alpha	TRA2A			0.297366	0.801562	15	13	13	43.6	32.688	64.231	0.0343523	0.0140695	0.525267	0.615773
K7ESP4;Q8WVC6;Q8WVC6-2	K7ESP4;Q8WVC6	Dephospho-CoA kinase domain-containing protein	DCAKD			0.297354	0.552714	11	11	11	57.4	24.177	36.291	-0.0526941	-0.11915	0.570949	0.790309
Q16633	Q16633	POU domain class 2-associating factor 1	POU2AF1			0.29689	0.358943	5	5	5	21.5	27.436	34.47	-0.00417774	0.0213375	-0.119463	1.28986
E7EPI0;Q9P2D0;Q9P2D0-2;E9PDR5;D6R9F4;Q9P2D0-3;H0Y9N7	E7EPI0;Q9P2D0;Q9P2D0-2;E9PDR5	Inhibitor of Bruton tyrosine kinase	IBTK			0.296344	0.497498	22	22	22	20	149.01	48.371	-0.154065	-0.109141	0.773321	0.675259
Q9BZE1;S4R369;A6NHR2;H0Y4J2	Q9BZE1;S4R369	39S ribosomal protein L37, mitochondrial	MRPL37			0.295867	0.529678	27	27	27	68.1	48.117	203.02	0.0209404	-0.197236	0.532865	0.826898
H0Y572	H0Y572		DOCK9			0.295391	0.263877	2	2	2	18.1	13.011	4.8166	-0.26135	0.0561673	NaN	1.09136
E7EQR4;P15311;E9PNP4	E7EQR4;P15311	Ezrin	EZR			0.295048	0.847468	59	59	45	68.8	69.371	323.31	-0.0398403	0.15549	0.637935	0.426606
Q9BUV8-4;Q9BUV8-3;Q9BUV8-2;Q9BUV8;Q9BUV8-5	Q9BUV8-4;Q9BUV8-3;Q9BUV8-2;Q9BUV8;Q9BUV8-5	Uncharacterized protein C20orf24	C20orf24			0.294454	0.557362	2	2	2	18.4	9.53	17.159	0.412501	0.0422241	-0.141558	0.864649
Q00765;B7Z332;B7Z510;H0Y8J8;E2QRG8;Q00765-2	Q00765	Receptor expression-enhancing protein 5	REEP5		+	0.293558	1.56778	7	7	7	25.9	21.493	46.156	0.110386	0.337768	0.457332	0.268747
P49796-1;P49796-4;P49796-6;P49796;P49796-2;P49796-9;H7BXY1;A0A087WUY2;P49796-7;P49796-8;C9J582	P49796-1;P49796-4;P49796-6;P49796;P49796-2;P49796-9;H7BXY1;A0A087WUY2;P49796-7;P49796-8	Regulator of G-protein signaling 3	RGS3			0.293536	0.666449	10	10	10	25.6	56.601	35.707	0.792507	0.371391	0.0247452	-0.0144982
P17036;C9JE35;C9J5S8;P17036-2	P17036	Zinc finger protein 3	ZNF3		+	0.293043	1.45367	5	4	4	20.9	50.915	6.8882	0.295128	0.389787	0.194213	NaN
Q96A35;X6RJ73;X6RHI2;X6RIR5	Q96A35;X6RJ73	39S ribosomal protein L24, mitochondrial	MRPL24			0.29235	0.46223	12	12	12	55.6	24.915	43.491	0.0090741	-0.287219	0.597507	0.850038
O15305;H3BV55;H3BPH4;H3BRM0;O15305-2;H3BR08;H3BM92;H3BV34;H3BT06;H3BNY9	O15305;H3BV55;H3BPH4	Phosphomannomutase 2;Phosphomannomutase	PMM2			0.292289	0.835809	16	16	14	60.6	28.082	96.483	0.0421152	0.032524	0.480575	0.613939
Q96K49-2;Q96K49;H7C1G1;H7C0B3	Q96K49-2;Q96K49;H7C1G1;H7C0B3	Transmembrane protein 87B	TMEM87B			0.29212	0.798248	4	4	4	7.2	63.404	16.794	0.114238	-0.00550715	0.354791	0.704959
A0A0A6YYA9;Q8IV61-2;Q8IV61;C9K0P4;C9J9C9;C9IYA5;C9JWP0;H7C352;H0YNK9	A0A0A6YYA9;Q8IV61-2;Q8IV61	Ras guanyl-releasing protein 3	RASGRP3			0.291611	0.58286	6	6	5	13.8	78.203	8.4342	-0.203139	0.298306	0.828469	0.242806
P43304;P43304-2;F5GYK7;E7EM56;E9PDK4	P43304;P43304-2	Glycerol-3-phosphate dehydrogenase, mitochondrial	GPD2			0.291203	0.481911	44	44	44	73.9	80.852	323.31	-0.127237	-0.159025	0.728748	0.722325
Q9H0J9;G5E9U9;H7C4L8;H7C4Z9	Q9H0J9	Poly [ADP-ribose] polymerase 12	PARP12			0.291135	0.5381	18	17	17	28.1	79.063	43.044	-0.0328061	-0.163704	0.642101	0.718949
Q6ZVF9	Q6ZVF9	G protein-regulated inducer of neurite outgrowth 3	GPRIN3			0.290334	1.11901	5	5	5	9	82.438	16.951	0.411752	0.332622	NaN	0.126628
A0A087WVA1;P62341;Q6IAK0;F8WBD0	A0A087WVA1;P62341;Q6IAK0	Selenoprotein T	SELT			0.290239	0.728288	6	6	6	34.4	22.344	39.439	0.195368	-0.145573	0.490673	0.62049
Q16514-2;Q16514	Q16514-2;Q16514	Transcription initiation factor TFIID subunit 12	TAF12			0.290216	0.265534	4	4	4	27.5	14.825	5.2873	-0.280362	0.0924781	NaN	1.05853
Q93009-3;Q93009;H3BND8;F5H2X1;H3BRA2;H3BUV0;H3BTM1;H3BQD1;I3L2D8;H3BMF6	Q93009-3;Q93009;H3BND8	Ubiquitin carboxyl-terminal hydrolase 7;Ubiquitin carboxyl-terminal hydrolase	USP7		+	0.289912	1.71156	64	64	64	65.1	126.27	323.31	0.261345	0.133432	0.330214	0.434656
O14548;E5RJZ1;H0YBD2;E5RFH8	O14548;E5RJZ1;H0YBD2	Cytochrome c oxidase subunit 7A-related protein, mitochondrial	COX7A2L			0.289531	0.396492	7	7	7	70.2	12.615	19.524	-0.10017	-0.328906	0.706995	0.880206
Q15714-2;Q15714-3;Q15714;A0A087X0H8;H0Y865	Q15714-2;Q15714-3;Q15714;A0A087X0H8;H0Y865	TSC22 domain family protein 1	TSC22D1;TSC22D2			0.289359	0.225618	4	3	1	25	15.68	49.923	-0.212383	-0.0592544	1.74429	-0.315218
Q06203;D6RCC8;D6RE15	Q06203	Amidophosphoribosyltransferase	PPAT			0.289302	0.836109	33	33	33	68.1	57.398	237.66	-0.0486546	0.130799	0.556797	0.518267
O00764;F2Z2Y4;O00764-3;O00764-2;A8MV33	O00764;F2Z2Y4;O00764-3;O00764-2	Pyridoxal kinase	PDXK			0.287715	1.0525	14	14	14	66.7	35.102	119.94	0.124928	0.0611541	0.424062	0.540715
Q9NX20;E9PI14	Q9NX20	39S ribosomal protein L16, mitochondrial	MRPL16			0.286845	0.754775	10	10	10	47.4	28.449	39.592	0.0332151	-0.0210137	0.552082	0.583095
A0A0A0MT22;P08575;X6R433;P08575-2;M3ZCP1;A0A075B788;E9PKH0;A0A0G2JNW2;M9MMK9	A0A0A0MT22;P08575;X6R433;P08575-2	Protein-tyrosine-phosphatase;Receptor-type tyrosine-protein phosphatase C	PTPRC / CD45			0.286467	0.929819	54	54	54	45.3	147.48	323.31	0.18848	-0.0218923	0.388906	0.590376
Q96G28;Q96G28-2;B5MCA1;B5MC35;B5MD16	Q96G28;Q96G28-2;B5MCA1;B5MC35;B5MD16	Cilia- and flagella-associated protein 36	CFAP36			0.285789	0.618185	7	7	7	31	39.446	16.908	-0.138814	0.0517201	0.682214	0.548037
Q02040;X6RAJ1;Q02040-2;Q02040-3	Q02040;X6RAJ1;Q02040-2;Q02040-3	A-kinase anchor protein 17A	AKAP17A		+	0.284941	1.37576	11	11	11	15.3	80.735	72.069	0.100577	0.190299	0.394185	0.454704
Q9Y5Z4;Q9Y5Z4-2;Q5THN1;C9IZA0	Q9Y5Z4;Q9Y5Z4-2	Heme-binding protein 2	HEBP2			0.284837	0.649555	7	7	7	34.6	22.875	16.829	-0.107152	0.0514416	0.680054	0.515006
P49902;P49902-2;Q5JUV4;Q5JUV3;Q5JUV6;H0YHR8;S4R3E7;S4R3A6;REV__M0QX83;REV__H0YES7;REV__F5GWJ3;REV__Q17RW3	P49902;P49902-2;Q5JUV4	Cytosolic purine 5-nucleotidase	NT5C2			0.283499	0.720371	28	28	28	55.8	64.969	204.57	-0.0247452	0.0104934	0.594357	0.553892
Q13432-2;Q13432;C9JSK0;J3QQT8;K7EJU3;K7EN86	Q13432-2;Q13432;C9JSK0	Protein unc-119 homolog A	UNC119			0.283497	0.485906	6	5	5	32.3	24.112	13.583	0.0318134	-0.275856	0.688673	0.689357
Q9NZ52;J3KSS7;Q9NZ52-4;Q9NZ52-2;Q9NZ52-3;B7Z1E9;J3QRP3;J3QRS8;J3QS87;J3KSG3;A0A087WYN2;J3KTR5;J3KS27;J3QRK7	Q9NZ52;J3KSS7;Q9NZ52-4;Q9NZ52-2;Q9NZ52-3	ADP-ribosylation factor-binding protein GGA3	GGA3			0.282926	0.658891	25	25	23	46.1	78.314	160.24	-0.0749165	0.0321009	0.476434	0.698085
P50749;P50749-2;Q9H2L5-3;Q9H2L5;Q9H2L5-2	P50749	Ras association domain-containing protein 2	RASSF2		+	0.282394	1.63961	18	18	18	57.1	37.79	143.27	0.205064	0.138814	0.378623	0.407077
P63010;P63010-2;A0A087X253;P63010-3;A0A087WU93;A0A087WZQ6;A0A087WYD1;K7ERB2;K7EN71;K7EJX1;K7EJ01;A0A087WXS3;K7EKZ5	P63010;P63010-2;A0A087X253;P63010-3;A0A087WU93;A0A087WZQ6;A0A087WYD1	AP-2 complex subunit beta	AP2B1			0.281907	0.584643	48	28	28	52.3	104.55	239.68	-0.0234682	-0.111882	0.680594	0.582382
P50552;K7EM16;K7ENL7;K7ENR7;K7EQD0;K7EIG8	P50552	Vasodilator-stimulated phosphoprotein	VASP		+	0.281483	1.60056	20	20	20	48.9	39.829	93.017	0.46029	0.259062	0.273814	0.132768
Q5VTE6-2;Q5VTE6	Q5VTE6-2;Q5VTE6	Protein angel homolog 2	ANGEL2			0.281156	0.450735	3	3	3	17.6	42.106	12.845	0.345436	-0.154281	NaN	0.652312
O75955;O75955-2;A2AB10;A2AB09;A2AB12;A2AB13;A0A0G2JJQ6;A2AB11;A2ABJ5	O75955;O75955-2;A2AB10;A2AB09	Flotillin-1	FLOT1			0.280627	0.989144	29	29	29	78.5	47.355	323.31	0.119511	0.0335111	0.438186	0.531302
Q5THR1;Q9H5Z1-2;Q9H5Z1;Q5THQ7;F2Z2Z2	Q5THR1;Q9H5Z1-2;Q9H5Z1	Probable ATP-dependent RNA helicase DHX35	DHX35		+	0.280341	1.59059	10	10	10	18	76.046	9.6314	0.210596	0.172487	0.476122	0.262157
Q9UJS0;Q9UJS0-2;R4GN64	Q9UJS0;Q9UJS0-2	Calcium-binding mitochondrial carrier protein Aralar2	SLC25A13			0.279886	0.819727	40	30	30	62.1	74.175	149.87	0.275664	-0.0677574	0.263876	0.647761
O75438;O75438-2	O75438;O75438-2	NADH dehydrogenase [ubiquinone] 1 beta subcomplex subunit 1	NDUFB1			0.279459	0.851483	4	4	4	51.7	6.9611	9.4664	0.0685439	0.0385766	0.378401	0.632316
D6RCD0;Q8NBQ5	D6RCD0;Q8NBQ5	Estradiol 17-beta-dehydrogenase 11	HSD17B11		+	0.279325	2.41177	9	9	9	42.2	28.102	52.972	0.198742	0.246226	0.330099	0.342232
Q9H497;Q9H497-2;Q5W0C6;Q5W0C9;Q9H497-3	Q9H497;Q9H497-2;Q5W0C6	Torsin-3A	TOR3A			0.279227	0.416936	8	8	8	26.4	46.198	28.843	0.119025	-0.410467	0.568032	0.840319
H7BXD5;P28676;H7C2Z6;C9JIZ3;C9JWQ8;C9JV47	H7BXD5;P28676;H7C2Z6	Grancalcin	GCA			0.278549	0.643223	13	13	13	68.2	22.109	156.05	-0.112633	0.0522768	0.663663	0.510889
Q99615;Q99615-2;K7ESP1;K7EIH8;K7EPP7;K7ER44;K7EJV7;K7ELJ8;K7EJL5;K7EN19;K7EJE9;K7EK03;K7EJ24;K7ENB7	Q99615;Q99615-2;K7ESP1;K7EIH8	DnaJ homolog subfamily C member 7	DNAJC7			0.27845	0.482397	39	39	39	66.8	56.44	323.31	-0.134484	-0.138521	0.707878	0.678926
S4R3V8;Q86X29-6;Q86X29-5;Q86X29-3;Q86X29-4;Q86X29;Q86X29-2;M0QZL9;M0R1W9	S4R3V8;Q86X29-6;Q86X29-5;Q86X29-3;Q86X29-4;Q86X29;Q86X29-2	Lipolysis-stimulated lipoprotein receptor	LSR			0.27777	0.903999	12	12	12	20.1	66.175	49.156	0.113333	-0.00187669	0.460585	0.539037
Q9BVI0;Q5JWZ0;Q5JXL1;A0A0A0MT13	Q9BVI0	PHD finger protein 20	PHF20			0.277721	0.359172	3	3	3	4	115.38	22.376	-0.136191	-0.355904	0.938323	0.664654
Q9Y679-2;Q9Y679;Q9Y679-3	Q9Y679-2;Q9Y679;Q9Y679-3	Ancient ubiquitous protein 1	AUP1			0.277382	0.707812	10	10	10	27.3	45.786	46.433	0.606496	-0.13348	0.151599	0.484913
F6QMI7;E9PEB9;E9PHM6;E7ERU0;Q03001-8;E7ETB9;Q03001-9;Q6P0N6;Q03001-13;Q5T0V7;Q03001-10;H0YC82;H0YBX0;E7ESK0;E7ERX3;H0YAT7;Q03001-12;Q03001-11;REV__Q9BX97	F6QMI7;E9PEB9;E9PHM6;E7ERU0;Q03001-8	Dystonin	DST			0.276693	0.21542	190	190	4	41.4	633.66	323.31	-0.633292	-0.492241	1.16736	1.06495
Q9H6Q4-3;Q9H6Q4;H3BSH2;Q9H6Q4-2;H3BSJ7;J3QRB0	Q9H6Q4-3;Q9H6Q4;H3BSH2;Q9H6Q4-2	Cytosolic Fe-S cluster assembly factor NARFL	NARFL			0.276626	0.778705	8	8	6	23.8	42.009	22.979	0.11857	-0.022405	0.333996	0.676342
Q8IWU2	Q8IWU2	Serine/threonine-protein kinase LMTK2	LMTK2			0.276166	0.43781	9	9	9	7.3	164.9	9.6193	-0.288181	0.00374607	0.515914	0.873186
Q96DU3-2;Q96DU3;Q96DU3-3	Q96DU3-2;Q96DU3;Q96DU3-3	SLAM family member 6	SLAMF6		+	0.276065	1.3388	5	5	5	19	37.274	55.611	0.221035	0.0746424	0.466131	0.342452
P30533	P30533	Alpha-2-macroglobulin receptor-associated protein	LRPAP1			0.275744	1.00947	13	13	13	33.9	41.465	18.889	0.125683	0.0404014	0.400429	0.536461
Q13084;A2IDC6;A2IDC7;Q4TT37	Q13084;A2IDC6;A2IDC7;Q4TT37	39S ribosomal protein L28, mitochondrial	MRPL28			0.275452	0.543069	15	15	15	57.8	30.156	120.29	0.115754	-0.233006	0.473943	0.745116
Q14344;Q14344-2	Q14344;Q14344-2	Guanine nucleotide-binding protein subunit alpha-13	GNA13			0.275319	0.885218	15	15	15	43.8	44.049	62.35	-0.00489682	0.102053	0.480472	0.523649
Q9NXJ5;Q9NXJ5-2;U3KQ24;U3KQG9;S4R2Y9	Q9NXJ5;Q9NXJ5-2	Pyroglutamyl-peptidase 1	PGPEP1			0.274994	0.768773	7	7	7	45	23.138	35.342	0.201576	-0.0995408	0.366252	0.63169
Q86YV0;Q86YV0-2;M0QX12;V9GYD1;H0Y638;H0Y3A3;A0A0A0MQZ2;B7ZCA0;Q5VWQ8-3;Q5VWQ8-4;Q5VWQ8-2;Q5VWQ8-5;Q5VWQ8;Q96PV0-3;Q96PV0-4;Q96PV0	Q86YV0;Q86YV0-2	RAS protein activator like-3	RASAL3			0.274505	0.648284	44	44	43	47.3	111.9	247	0.160605	-0.15909	0.410124	0.686383
E7EWM3;A0A087X127;Q8NF64-3;Q8NF64-2;Q8NF64	E7EWM3;A0A087X127;Q8NF64-3;Q8NF64-2;Q8NF64	Zinc finger MIZ domain-containing protein 2	ZMIZ2			0.274221	0.621477	7	3	3	8.1	93.667	7.5499	0.138664	0.0807941	NaN	0.603205
Q96GC9;K7EPE7;Q96GC9-2;K7EL93;K7EL74;K7ENU2;K7EK01;K7EMI0;K7ELS2	Q96GC9;K7EPE7;Q96GC9-2	Vacuole membrane protein 1	VMP1			0.274124	0.46321	4	4	4	19.7	46.237	39.718	-0.0433446	-0.232328	0.581785	0.790384
P53667-4;E9PC47;P53667-2;P53667;P53667-3	P53667-4;E9PC47;P53667-2;P53667	LIM domain kinase 1	LIMK1			0.274076	1.10994	18	18	17	33.1	68.728	40.699	0.162363	0.0489337	0.511063	0.373944
O96005-4;O96005;O96005-3;K7EQQ1;K7EJ16;K7ERL5	O96005-4;O96005;O96005-3;K7EQQ1	Cleft lip and palate transmembrane protein 1	CLPTM1			0.273748	0.70157	9	9	9	14.4	75.177	60.818	0.330774	-0.148113	0.24987	0.66246
Q9NXR5;Q8IUW1;Q9NXR5-2;S4R3R2	Q9NXR5;Q8IUW1;Q9NXR5-2	Ankyrin repeat domain-containing protein 10	ANKRD10			0.273323	0.746132	6	6	6	22.6	44.767	17.766	0.121424	-0.0944181	0.55817	0.508116
P53396;P53396-2;P53396-3;K7EIE7;K7ESG8	P53396;P53396-2;P53396-3	ATP-citrate synthase	ACLY			0.273312	0.601622	76	76	76	68.3	120.84	323.31	-0.00504058	-0.109826	0.619084	0.589029
P29692-3;E9PL71;E9PN91	P29692-3;E9PL71	Elongation factor 1-delta	EEF1D		+	0.273139	1.81252	30	1	1	90.3	28.558	87.418	0.192134	0.170438	0.334683	0.395302
Q13131;Q13131-2;Q96E92	Q13131;Q13131-2	5-AMP-activated protein kinase catalytic subunit alpha-1	PRKAA1			0.272316	0.731455	23	23	19	52.6	64.009	123.74	0.0486061	-0.0337911	0.437654	0.636795
Q6IPR3;Q6IPR3-2;V9GZ67;V9GY40	Q6IPR3;Q6IPR3-2	tRNA wybutosine-synthesizing protein 3 homolog	TYW3			0.271545	0.631655	6	6	6	30.1	29.794	22.375	0.0525956	-0.128472	0.570463	0.591593
Q9C0F1;Q9C0F1-2;D6RGX6;D6RC25;D6RBX1	Q9C0F1;Q9C0F1-2;D6RGX6;D6RC25	Centrosomal protein of 44 kDa	CEP44			0.271083	0.31897	8	8	8	23.8	44.139	21.743	-0.0352017	-0.0575568	-0.103488	1.28058
B4DKB2;P42892-3;P42892-2;P42892-4;P42892	B4DKB2;P42892-3;P42892-2;P42892-4;P42892	Endothelin-converting enzyme 1	ECE1			0.27063	0.341799	7	7	7	11.1	83.573	14.158	0.190223	-0.227675	-0.0640575	1.18403
Q63HQ0	Q63HQ0	AP-1 complex-associated regulatory protein	AP1AR			0.270626	0.36258	1	1	1	4.3	34.28	20.877	-0.499374	0.0889556	0.788435	0.704489
A0A0A0MRS4;Q9NVV0	A0A0A0MRS4;Q9NVV0	Trimeric intracellular cation channel type B	TMEM38B			0.270296	0.367067	2	2	2	9.7	26.45	11.49	1.1141	-0.0194482	-0.238017	0.224553
Q9BRR8;K7EQ19	Q9BRR8	G patch domain-containing protein 1	GPATCH1		+	0.269893	1.35596	12	12	12	16.1	103.34	55.804	0.315235	0.0905825	0.205142	0.468611
Q9BYK8;Q9BYK8-2;Q9BYK8-4	Q9BYK8;Q9BYK8-2;Q9BYK8-4	Helicase with zinc finger domain 2	HELZ2			0.269679	0.524899	4	4	4	1.7	294.65	4.67	0.454961	-0.117772	NaN	0.471849
Q96MH2	Q96MH2	Protein HEXIM2	HEXIM2			0.269566	0.429927	4	4	4	16.1	32.418	16.989	-0.34301	0.101381	0.86671	0.453182
Q8IUF1;C9J3G2;Q9BRT8-4;A0A0B4J1T6	Q8IUF1;C9J3G2	COBW domain-containing protein 2	CBWD2			0.26939	1.05461	19	19	1	62.5	44.034	169.52	0.0447466	0.128557	0.490467	0.413788
Q9Y6P5-2;Q9Y6P5;Q9Y6P5-3;P58005-4;P58005	Q9Y6P5-2;Q9Y6P5;Q9Y6P5-3	Sestrin-1	SESN1			0.269108	0.360397	9	9	9	20.5	63.825	20.414	0.0185564	-0.232938	0.153676	1.13714
P82970;Q5JSL0;Q5JSK6;Q5JSK9;Q5JSK7;Q5JSK8	P82970;Q5JSL0;Q5JSK6;Q5JSK9;Q5JSK7;Q5JSK8	High mobility group nucleosome-binding domain-containing protein 5	HMGN5			0.269033	1.20767	10	10	10	42.9	31.524	269.91	0.112943	0.1141	0.478506	0.370583
Q86TI2;Q86TI2-2;Q86TI2-4;M0R2A8;M0R2G6;M0R162;M0R3C4;M0QXI5;M0R0I1;M0R1L4;M0R3E8;M0QXG6;M0R145	Q86TI2;Q86TI2-2;Q86TI2-4	Dipeptidyl peptidase 9	DPP9			0.268608	0.76417	32	32	32	46	98.262	138.37	-0.0172093	0.0352017	0.544584	0.511855
Q8IWB1;X6RK76	Q8IWB1	Inositol 1,4,5-trisphosphate receptor-interacting protein	ITPRIP			0.267518	0.435365	13	13	13	29.1	62.059	40.573	0.166568	-0.3698	0.442227	0.831076
Q9Y3P9;Q9Y3P9-2;Q9Y3P9-3;Q9Y3P9-4;B5MCD9;C9JGR5	Q9Y3P9	Rab GTPase-activating protein 1	RABGAP1			0.267007	0.791124	32	32	30	35.2	121.74	172.35	-0.0458623	0.0912598	0.54587	0.476759
Q9NVN8	Q9NVN8	Guanine nucleotide-binding protein-like 3-like protein	GNL3L			0.266865	0.473594	27	27	27	54.6	65.572	134.68	-0.0503276	-0.199852	0.539134	0.778506
Q96LJ7;H0YNC2	Q96LJ7;H0YNC2	Dehydrogenase/reductase SDR family member 1	DHRS1			0.266405	0.316701	8	8	8	34.8	33.909	46.806	-0.249991	-0.366466	0.798258	0.883822
H0YG20;Q9UKM7;H0YGV7;H0YIU0;H0YI64	H0YG20;Q9UKM7;H0YGV7	alpha-1,2-Mannosidase;Endoplasmic reticulum mannosyl-oligosaccharide 1,2-alpha-mannosidase	MAN1B1		+	0.266365	1.41398	13	13	13	20.4	78.973	46.486	0.340094	0.136454	0.145612	0.443301
P54619-2;P54619;P54619-3;F8VYY9;H0YIC9;H0YHF8;F8VVA3;F8VZX1;F8VSH3;F8VRY2;F8VSL2;F8VPF5;B4DUK8;E9PGP6;Q9UGJ0-2;Q9UGI9-2;Q9UGI9;Q9UGJ0-3;Q9UGJ0	P54619-2;P54619;P54619-3;F8VYY9;H0YIC9	5-AMP-activated protein kinase subunit gamma-1	PRKAG1			0.266017	0.625831	13	13	13	55.2	34.083	76.94	-0.0713507	0.0287106	0.719315	0.387393
Q9BTY2;Q9BTY2-2	Q9BTY2	Plasma alpha-L-fucosidase	FUCA2			0.265063	0.259156	4	4	3	10.5	54.066	14.197	-0.457121	-0.367937	0.809332	1.07598
Q4G148-2;Q4G148	Q4G148-2;Q4G148	Glucoside xylosyltransferase 1	GXYLT1			0.264932	0.606346	8	8	8	20	46.8	33.51	0.0644497	-0.101954	0.355016	0.742217
O94925;H7BZD1;B7Z509;C9JIJ6;H7C201;O94925-2	O94925	Glutaminase kidney isoform, mitochondrial	GLS			0.264874	0.939276	29	29	6	55.3	73.46	323.31	0.28372	-0.0626857	0.323312	0.51515
Q7Z417;Q7Z417-2	Q7Z417	Nuclear fragile X mental retardation-interacting protein 2	NUFIP2			0.264189	0.575749	23	23	23	48.1	76.12	323.31	0.0161181	-0.143994	0.537346	0.647287
Q92520;C9JP35;C9JMN4	Q92520	Protein FAM3C	FAM3C			0.263902	0.484439	10	10	10	49.3	24.68	88.529	0.129229	-0.313513	0.551885	0.688009
X6RAB3;Q92738;Q92738-2	X6RAB3;Q92738;Q92738-2	USP6 N-terminal-like protein	USP6NL			0.263098	0.524165	3	3	3	3.3	96.665	3.2763	0.537906	0.351289	NaN	-0.0999011
Q5T9A4;Q5T9A4-3;Q5T9A4-2	Q5T9A4;Q5T9A4-3	ATPase family AAA domain-containing protein 3B	ATAD3B		+	0.263082	1.30268	44	13	9	63	72.572	76.789	0.108068	0.154065	0.321005	0.46919
Q92574;Q92574-2;Q86WV8	Q92574;Q92574-2	Hamartin	TSC1		+	0.262967	1.32095	16	16	16	21.7	129.77	74.331	0.0909412	0.158208	0.406428	0.39629
P60604;P60604-2;F8WCB9;F8WDB1	P60604;P60604-2	Ubiquitin-conjugating enzyme E2 G2	UBE2G2			0.262268	1.20064	6	6	6	49.1	18.566	81.306	0.388828	0.103128	0.109829	0.447288
P62070;P62070-4;A0A0C4DGH2;P62070-3;E9PK85;P62070-2;E9PQK5;E9PQC5;E9PQ87	P62070;P62070-4;A0A0C4DGH2;P62070-3;E9PK85;P62070-2	Ras-related protein R-Ras2	RRAS2		+	0.262042	1.47013	10	10	7	52.9	23.399	68.154	0.293925	0.0590784	0.310224	0.384941
Q6ICG6-3;Q6ICG6;Q6ICG6-2;B0QY18;B0QY20;B0QY16;H7C1U5;V9GYW7;V9GZ62	Q6ICG6-3;Q6ICG6;Q6ICG6-2;B0QY18;B0QY20;B0QY16	Uncharacterized protein KIAA0930	KIAA0930		+	0.261948	1.97274	9	9	9	26.8	41.728	24.067	0.354003	0.136716	0.262193	0.29488
Q9NZM5;M0QZ34;M0QX73;M0QZU5;M0QYZ9	Q9NZM5	Glioma tumor suppressor candidate region gene 2 protein	GLTSCR2			0.261768	0.978889	15	15	15	37.2	54.389	194.66	0.108176	0.0354831	0.38659	0.516821
Q9NTX5-2;Q9NTX5;Q9NTX5-6;Q9NTX5-3;H0Y5L2;F2Z2D6;E9PJS8;J3KP84;E9PPG7;E9PRU6;E9PLY6;Q9NTX5-5;E9PIU8;H0YCS9;H0Y525;Q9NTX5-4	Q9NTX5-2;Q9NTX5;Q9NTX5-6;Q9NTX5-3;H0Y5L2	Ethylmalonyl-CoA decarboxylase	ECHDC1			0.261569	0.795988	15	15	15	65.4	32.997	183.01	0.0111081	0.026021	0.529171	0.479975
Q16563-2;C9JYN0;Q16563;H7C4J8	Q16563-2;C9JYN0;Q16563	Synaptophysin-like protein 1	SYPL1		+	0.26143	1.5905	7	7	7	29	26.411	65.637	0.36762	0.0893625	0.244765	0.343971
Q9UHQ4;B7Z2L0;C9IYK6;C9JTE9;H7C5E2;Q9UHQ4-2;C9JGJ9;H0Y7N8;F8WB99	Q9UHQ4;B7Z2L0;C9IYK6;C9JTE9;H7C5E2;Q9UHQ4-2	B-cell receptor-associated protein 29	BCAP29		+	0.261316	1.40962	3	3	3	17	28.32	7.4384	0.322866	0.103128	0.181802	0.437467
C9JAX1;Q16595;H7C585;Q16595-2;Q16595-3	C9JAX1;Q16595;H7C585	Frataxin, mitochondrial;Frataxin intermediate form;Frataxin(56-210);Frataxin(78-210);Frataxin mature form	FXN			0.26115	0.62517	6	6	6	51.9	14.91	32.355	-0.040121	-0.03811	0.651683	0.471149
P46087;P46087-4;A0A087WV73;P46087-2;P46087-3;F5H5X6;F5GYR3;F5GWB7;F5H709;F5H359;F5H8G6	P46087;P46087-4;A0A087WV73;P46087-2;P46087-3	Probable 28S rRNA (cytosine(4447)-C(5))-methyltransferase	NOP2			0.259269	0.42142	37	37	37	47.2	89.301	186.12	0.0868138	-0.330792	0.425674	0.855379
P29590;P29590-5;P29590-11;P29590-4;P29590-9;P29590-12;H3BT57;P29590-14;P29590-10;H3BT29;H3BUJ5;H3BVD2	P29590;P29590-5;P29590-11;P29590-4;P29590-9;P29590-12;H3BT57;P29590-14;P29590-10;H3BT29	Protein PML	PML			0.25899	0.547644	26	26	4	33.4	97.55	192.67	-0.0705267	-0.0977488	0.568227	0.63601
O95861;O95861-4;O95861-2;A6NF51;F8VVW8;F8W1J0;F8VZG4	O95861;O95861-4;O95861-2;A6NF51	3(2),5-bisphosphate nucleotidase 1	BPNT1		+	0.258744	1.38769	21	21	7	73.4	33.392	210.57	0.322523	0.426426	0.208392	0.0776346
E7EUN9;Q9NX74;J3QLD5;I3L4Y9;H3BMK6;I3L1K5;H3BQX4;H3BM64;I3L4H0;H3BRI6;H3BSF3;I3L0K0;H3BTR3	E7EUN9;Q9NX74;J3QLD5	tRNA-dihydrouridine(20) synthase [NAD(P)+]-like	DUS2			0.258624	0.505251	9	9	9	21.6	51.388	34.161	-0.100036	-0.121989	0.621431	0.635092
Q96B23-2;Q5BIX2;Q96B23;K7EQH1;A0A087WVF1	Q96B23-2;Q5BIX2;Q96B23	Uncharacterized protein C18orf25	C18orf25;ARKL1			0.258454	0.818462	3	3	3	14.9	36.977	27.935	0.457455	0.0619835	NaN	0.255925
Q15572-2;Q15572-6;Q15572;Q15572-5;Q15572-4;H3BUZ7;H3BNH3;H3BR91	Q15572-2;Q15572-6;Q15572;Q15572-5;Q15572-4	TATA box-binding protein-associated factor RNA polymerase I subunit C	TAF1C			0.257758	0.334597	3	3	3	7.4	84.984	5.3457	0.0788531	-0.499422	0.516318	0.935283
P13498	P13498	Cytochrome b-245 light chain	CYBA			0.257553	0.237751	3	3	3	28.7	21.012	6.2	0.578672	-0.795884	0.0846086	1.16282
Q9HAN9;B1AN62	Q9HAN9;B1AN62	Nicotinamide/nicotinic acid mononucleotide adenylyltransferase 1	NMNAT1			0.257505	0.709571	6	6	6	36.9	31.932	42.439	0.0950035	-0.0964063	0.475708	0.555715
P15291-2;P15291	P15291-2;P15291	Beta-1,4-galactosyltransferase 1;Lactose synthase A protein;N-acetyllactosamine synthase;Beta-N-acetylglucosaminylglycopeptide beta-1,4-galactosyltransferase;Beta-N-acetylglucosaminyl-glycolipid beta-1,4-galactosyltransferase;Processed beta-1,4-galactosyltransferase 1	B4GALT1			0.256776	0.943799	6	6	6	22.3	42.537	39.597	0.376807	-0.0849457	0.421695	0.313549
P35579;P35579-2;Q5BKV1;B1AH99;A0A0C4DFM8;A1L2Z2;REV__S4R3H4;REV__E7EQT4;REV__Q9UKV3-5;REV__Q9UKV3;A0A087X0T3;P12883;P13535;P13533;P11055;A7E2Y1	P35579;P35579-2	Myosin-9	MYH9			0.255932	1.05647	186	186	155	74.1	226.53	323.31	0.0810032	0.0875986	0.490981	0.364144
P05976-2;P05976;P08590	P05976-2;P05976;P08590	Myosin light chain 1/3, skeletal muscle isoform;Myosin light chain 3	MYL1;MYL3			0.255771	0.628249	1	1	1	8	16.684	3.3137	-0.0526941	0.111699	0.746571	0.217507
P16455	P16455	Methylated-DNA--protein-cysteine methyltransferase	MGMT		+	0.254905	1.35574	7	7	7	46.9	21.646	65.193	0.27673	0.198745	0.0913952	0.452748
Q9H832;Q9H832-2;D6RB11;I3L286;H0Y9X8;I3L4C5;I3L3V3	Q9H832;Q9H832-2	Ubiquitin-conjugating enzyme E2 Z	UBE2Z			0.254763	0.393627	14	14	14	36.2	38.21	58.522	-0.267835	-0.110682	0.817951	0.57962
E9PN09;Q6YBV0	E9PN09;Q6YBV0	Proton-coupled amino acid transporter 4	SLC36A4			0.254203	0.791663	2	2	2	32.4	12.041	1.8974	NaN	0.428678	0.301588	0.0323444
P34910-2;P34910	P34910-2;P34910	Protein EVI2B	EVI2B		+	0.25401	1.47219	4	4	4	12.5	50.583	15.127	0.303205	0.14965	0.138421	0.424765
Q5TCJ5;Q9H3S1;Q9H3S1-2;Q5TCI6;Q5TCI4;Q5TCJ7	Q5TCJ5;Q9H3S1;Q9H3S1-2;Q5TCI6	Semaphorin-4A	SEMA4A		+	0.253803	1.98147	18	18	18	38.2	79.712	199.87	0.381066	0.203389	0.186501	0.244258
P14854;K7EQD3	P14854	Cytochrome c oxidase subunit 6B1	COX6B1			0.2538	0.507352	5	5	5	75.6	10.192	49.441	-0.0621217	-0.150545	0.611739	0.616127
Q9H5K3;E5RJD5	Q9H5K3	Protein O-mannose kinase	POMK		+	0.253588	1.55804	10	10	10	40	40.05	32.306	0.283404	0.0677764	0.34153	0.32164
O75844	O75844	CAAX prenyl protease 1 homolog	ZMPSTE24			0.25357	0.753962	17	17	17	39.6	54.812	158.83	0.0825607	-0.0523114	0.414893	0.569137
Q8TB03;Q8TB03-3;Q8TB03-2	Q8TB03;Q8TB03-3	Uncharacterized protein CXorf38	CXorf38			0.25336	1.24959	15	15	15	50.2	36.67	32.318	0.0725738	0.1503	0.40719	0.383379
E5RJM0;B7ZLQ8;Q17RY0-2;Q17RY0;H0YBG1;J3KN18;Q7Z5Q1-7;Q7Z5Q1-5;Q7Z5Q1-4;Q7Z5Q1-6;Q7Z5Q1-3;Q7Z5Q1;Q8NE35-2;Q8NE35;Q7Z5Q1-8;Q7Z5Q1-9;H0Y9D9	E5RJM0;B7ZLQ8;Q17RY0-2;Q17RY0	Cytoplasmic polyadenylation element-binding protein 4	CPEB4			0.253313	1.2282	10	10	4	21.1	69.768	49.207	0.0801184	0.136585	0.427606	0.368942
Q8TCT8;H0YNA7;H0YNA2	Q8TCT8;H0YNA7	Signal peptide peptidase-like 2A	SPPL2A			0.253133	0.284838	3	3	3	6.5	58.143	6.3729	-0.435735	-0.241083	0.967095	0.722253
P12004	P12004	Proliferating cell nuclear antigen	PCNA			0.252659	0.804364	24	24	24	95.4	28.768	323.31	0.0349583	0.012068	0.539928	0.423681
Q9BV73-2;Q9BV73;H7C0P0;E7ETF9;E9PHT2;H7C0D6;H0Y5R2;A6PVI9	Q9BV73-2;Q9BV73	Centrosome-associated protein CEP250	CEP250			0.25216	0.883746	39	39	39	23.1	274.38	159.36	0.0193897	0.066537	0.496922	0.425792
Q92643;B1AK81;Q92643-2;A6NEM5	Q92643;B1AK81;Q92643-2;A6NEM5	GPI-anchor transamidase	PIGK			0.252001	0.605378	10	10	10	19	45.251	23.611	0.0409718	-0.123324	0.632919	0.457435
J3KPQ4;Q9BRR9-4;Q9BRR9-3;Q9BRR9-2;Q9BRR9;R4GN15;Q9BRR9-5;H0YI36;H0YI33;F8VW89;F8VR90;F8VQR0;F8W1N6	J3KPQ4;Q9BRR9-4;Q9BRR9-3;Q9BRR9-2;Q9BRR9;R4GN15;Q9BRR9-5;H0YI36	Rho GTPase-activating protein 9	ARHGAP9			0.251561	0.777359	8	7	7	11.8	90.567	13.847	0.452432	0.420186	-0.149057	0.282685
Q8IV20;A2A3Z5	Q8IV20	Laccase domain-containing protein 1	LACC1			0.251469	0.554561	7	7	7	21.4	47.78	14.964	-0.121546	-0.00969855	0.686702	0.450419
Q8WVQ1-3;Q8WVQ1;K7EN15;Q8WVQ1-2	Q8WVQ1-3;Q8WVQ1;K7EN15;Q8WVQ1-2	Soluble calcium-activated nucleotidase 1	CANT1			0.251459	0.336738	8	8	8	30.6	38.945	9.197	0.280633	-0.183228	-0.175289	1.08372
Q6P4A7;Q6P4A7-2;Q6P4A7-3;B1AMV7	Q6P4A7;Q6P4A7-2	Sideroflexin-4	SFXN4		+	0.250861	1.32305	7	7	7	26.7	37.998	14.653	0.255133	0.293841	0.042084	0.412385
D6RAM3;Q7L591;D6RC22;Q7L591-3;D6R951;D6R977;D6RAV2;Q7L591-4;D6RAZ9;Q7L591-2;D6RF29	D6RAM3;Q7L591	Docking protein 3	DOK3			0.250563	0.869414	20	20	20	64.5	47.601	155.98	0.355498	-0.118257	0.365245	0.399768
P30047;P30047-2;H0YNX7;H0YNM1;A0A087WTI4	P30047;P30047-2;H0YNX7	GTP cyclohydrolase 1 feedback regulatory protein	GCHFR		+	0.250485	1.43742	5	5	5	88.1	9.6981	54.975	0.406541	0.299127	0.0769695	0.219304
Q9UPN7;K7EM28	Q9UPN7	Serine/threonine-protein phosphatase 6 regulatory subunit 1	PPP6R1			0.25027	0.723948	24	24	24	45.4	96.723	174.61	0.101567	-0.0713757	0.372061	0.598828
Q9Y2K1-2;Q9Y2K1	Q9Y2K1-2;Q9Y2K1	Zinc finger and BTB domain-containing protein 1	ZBTB1			0.249751	0.980974	5	5	5	9.6	73.682	16.856	0.0818122	0.102994	0.551295	0.262902
P10074;Q5SY21;Q5SY20;K7EM76	P10074;Q5SY21;Q5SY20	Zinc finger and BTB domain-containing protein 48	ZBTB48			0.249181	0.580628	6	6	6	11.9	77.053	3.9006	0.124314	-0.0332151	0.124593	0.781033
Q96JY6;Q96JY6-5;A0A087WXJ0;C9J760;C9J0X3;C9K0F0;C9JSR2;C9JS55;A0A087WVI1;Q96JY6-2;Q96JY6-4;Q96JY6-3;B3KPU0	Q96JY6;Q96JY6-5;A0A087WXJ0;C9J760;C9J0X3;C9K0F0;C9JSR2;C9JS55;A0A087WVI1;Q96JY6-2;Q96JY6-4;Q96JY6-3	PDZ and LIM domain protein 2	PDLIM2			0.24788	1.09588	3	3	3	9.1	37.458	4.9213	0.397277	0.167615	0.178746	NaN
Q9UI10;E7ERK9;A0A087WW69;F8W8L6;H7C2L8;F8WEV6	Q9UI10;E7ERK9	Translation initiation factor eIF-2B subunit delta	EIF2B4			0.247808	0.324464	26	1	1	62.7	57.557	17.902	0.684272	-0.282842	NaN	0.341994
B1AKN8;B1AKN7;Q12857-3;Q12857;Q12857-4;B1AKN5;S4R3K4;B1AKN6;S4R3W2;S4R308;K7EMQ5;K7ESG9;K7EKH0;S4R3K5;K7EJB0;C9JWJ8;K7EN08;Q14938-6;Q14938-5;Q14938-3;Q14938-2;Q14938-4;Q14938	B1AKN8;B1AKN7;Q12857-3;Q12857;Q12857-4;B1AKN5;S4R3K4;B1AKN6	Nuclear factor 1;Nuclear factor 1 A-type	NFIA			0.247497	0.425343	7	7	1	20.3	58.538	21.731	-0.24245	-0.0716032	0.732399	0.571643
P00387-2;P00387;P00387-3;B1AHF3	P00387-2;P00387;P00387-3;B1AHF3	NADH-cytochrome b5 reductase 3;NADH-cytochrome b5 reductase 3 membrane-bound form;NADH-cytochrome b5 reductase 3 soluble form	CYB5R3			0.247378	1.17256	17	17	17	60.1	31.628	323.31	0.232922	0.0264459	0.275126	0.45502
P17050	P17050	Alpha-N-acetylgalactosaminidase	NAGA			0.247268	0.71414	6	6	6	20.4	46.564	38.976	0.181395	-0.111555	0.319618	0.599615
O60232;H0YEB6;G3V1B8;H0YEK1;E9PN57;E9PK41	O60232;H0YEB6;G3V1B8	Sjoegren syndrome/scleroderma autoantigen 1	SSSCA1			0.247226	1.00732	8	8	8	69.8	21.474	41.303	0.212885	0.182692	0.0515809	0.541744
Q13177;H7C1X3;E9PM17;B3KNX7;Q13153;Q13153-2;H0YCG5;B1AKS5	Q13177	Serine/threonine-protein kinase PAK 2;PAK-2p27;PAK-2p34	PAK2			0.246629	0.647669	34	34	26	71.6	58.042	323.31	0.00701409	-0.0661102	0.464459	0.581152
Q9Y6M4-3;Q9Y6M4;Q9Y6M4-2;Q9Y6M4-4;Q9Y6M4-5;Q9Y6M4-6;H0YBN6;U3KQP7;A0A087WZK4;A0A087WW97	Q9Y6M4-3;Q9Y6M4;Q9Y6M4-2;Q9Y6M4-4;Q9Y6M4-5;Q9Y6M4-6	Casein kinase I isoform gamma-3	CSNK1G3			0.246386	0.840975	16	16	7	42.3	48.897	33.709	0.0884541	-0.010454	0.376846	0.530698
A0A0C4DGS0;P56556;R4GN43	A0A0C4DGS0;P56556;R4GN43	NADH dehydrogenase [ubiquinone] 1 alpha subcomplex subunit 6	NDUFA6			0.246001	1.04913	8	8	8	53.1	15.136	50.188	0.180479	0.0124972	0.310107	0.480921
Q9NYP7;Q9NYP7-2;A0A0A0MTI6;Q9NYP7-3	Q9NYP7;Q9NYP7-2;A0A0A0MTI6	Elongation of very long chain fatty acids protein 5;Elongation of very long chain fatty acids protein	ELOVL5			0.245358	0.749257	3	3	3	16.4	35.293	9.0463	0.00450818	0.00805652	0.542803	0.426063
K7EM18;P41567;K7EQP2	K7EM18;P41567	Eukaryotic translation initiation factor 1	EIF1			0.245288	0.591172	9	9	3	71.9	13.607	262.26	0.0293673	-0.13155	0.590243	0.493093
Q6PD74;Q6PD74-2;H0YL49	Q6PD74;Q6PD74-2	Alpha- and gamma-adaptin-binding protein p34	AAGAB			0.245175	0.587134	4	4	4	20.6	34.593	15.668	0.184621	-0.220396	0.422879	0.593594
A0A0G2JJD3;O95870;O95870-2;F2Z3G6;F2Z3H2;A0A0G2JI89	A0A0G2JJD3;O95870;O95870-2	Abhydrolase domain-containing protein 16A	ABHD16A			0.244732	0.491861	4	4	4	6.2	67.518	6.5792	0.296244	-0.2472	0.171335	0.75855
J3QTA6;Q9BRQ6;H0Y922;J3QTB2	J3QTA6;Q9BRQ6;H0Y922	MICOS complex subunit MIC25	CHCHD6			0.244478	0.497455	5	5	5	25	28.817	15.438	-0.0104934	-0.124157	0.324696	0.787866
J3QRS3;P19105;O14950;P24844;J3KTJ1;P24844-2	J3QRS3;P19105;O14950;P24844	Myosin regulatory light chain 12A;Myosin regulatory light chain 12B;Myosin regulatory light polypeptide 9	MYL12A;MYL12B;MYL9			0.244085	1.00903	15	15	15	64.4	20.457	323.31	0.0346922	0.136191	0.504671	0.300786
Q9Y4C4	Q9Y4C4	Malignant fibrous histiocytoma-amplified sequence 1	MFHAS1			0.243822	0.337332	5	5	5	6.2	116.95	3.2738	NaN	-0.274058	0.626766	0.378757
P49327;J3KTF0	P49327	Fatty acid synthase;[Acyl-carrier-protein] S-acetyltransferase;[Acyl-carrier-protein] S-malonyltransferase;3-oxoacyl-[acyl-carrier-protein] synthase;3-oxoacyl-[acyl-carrier-protein] reductase;3-hydroxyacyl-[acyl-carrier-protein] dehydratase;Enoyl-[acyl-carrier-protein] reductase;Oleoyl-[acyl-carrier-protein] hydrolase	FASN			0.243093	0.62351	151	151	151	67.7	273.42	323.31	0.0286607	-0.106669	0.505586	0.544792
Q9NXE8;A0A087WY60;Q9NXE8-2	Q9NXE8	Pre-mRNA-splicing factor CWC25 homolog	CWC25			0.242817	0.565009	6	6	6	13.4	49.647	8.2928	0.0417736	-0.126329	0.69207	0.363754
Q96A33;Q96A33-2;A0A087WYW6;J3QR89	Q96A33;Q96A33-2;A0A087WYW6	Coiled-coil domain-containing protein 47	CCDC47			0.242262	0.625841	25	25	25	51.8	55.873	209.59	0.0313711	-0.103534	0.471968	0.569244
Q96BK5;E5RGR1;E5RJG9;Q9BT81-2;A0A0A6YYK5;Q96BK5-2	Q96BK5;E5RGR1	PIN2/TERF1-interacting telomerase inhibitor 1	PINX1			0.241393	0.763592	8	8	8	33.2	37.034	77.646	0.251058	0.0321009	0.0621218	0.62029
Q13011;M0R248;M0QZW4;M0QXS7;M0R280;M0R1A2	Q13011;M0R248	Delta(3,5)-Delta(2,4)-dienoyl-CoA isomerase, mitochondrial	ECH1			0.241324	0.629907	20	20	14	74.1	35.816	323.31	0.0404227	-0.106482	0.463309	0.568045
P55212;D6RHU3;P55212-2;D6RBM3	P55212;D6RHU3;P55212-2	Caspase-6;Caspase-6 subunit p18;Caspase-6 subunit p11	CASP6			0.241235	0.974672	8	8	8	34.1	33.31	20.218	0.0932786	0.0600474	0.516116	0.2955
P31146;H3BRY3;H3BTU6;H3BRJ0;H3BNA2;H3BU76;H3BSL1	P31146;H3BRY3	Coronin-1A;Coronin	CORO1A		+	0.241121	2.16432	36	35	34	62.3	51.026	323.31	0.272524	0.148479	0.225892	0.317588
Q96HI0-2;Q96HI0;C9JHT8	Q96HI0-2;Q96HI0	Sentrin-specific protease 5	SENP5			0.240428	0.402161	3	3	3	5.8	81.309	3.1855	-0.0422242	0.0798389	NaN	0.683669
Q5T063;Q9NZJ6;F6WGP0	Q5T063;Q9NZJ6	Ubiquinone biosynthesis O-methyltransferase, mitochondrial	COQ3			0.240377	0.940686	5	5	5	19.4	34.647	13.488	0.525164	0.293253	0.100709	0.0423825
Q86WX3;F8WFE7	Q86WX3	Active regulator of SIRT1	RPS19BP1			0.240329	0.357864	5	5	5	36	15.434	27.901	0.417926	-0.237268	-0.142975	0.923632
P35754	P35754	Glutaredoxin-1	GLRX		+	0.24016	1.3037	6	6	6	78.3	11.776	167.63	0.151683	0.0877344	0.423524	0.297697
Q7Z6M4;C9JNJ7;B4DFP7;C9JX74;B5MBW3;E7EW93;B4DKD5;H7C316;H7C1N9	Q7Z6M4;C9JNJ7;B4DFP7	Transcription termination factor 4, mitochondrial;mTERF domain-containing protein 2 processed	MTERF4			0.240069	0.370692	5	5	5	13.1	43.957	7.6078	-0.311154	-0.0359637	0.433707	0.873688
Q86Y39;K7EQ77;K7EK78;K7EP35;K7EMT4;Q86Y39-2;K7ELJ0	Q86Y39;K7EQ77;K7EK78;K7EP35;K7EMT4;Q86Y39-2	NADH dehydrogenase [ubiquinone] 1 alpha subcomplex subunit 11	NDUFA11			0.239714	0.830932	6	6	6	58.9	14.852	46.312	0.152452	0.0394191	0.166715	0.600271
Q92835-2;Q92835;Q92835-3;H0Y5Q9;H7C403;R4GMN8;D6RJB9;A0A0A0MSJ4;Q7Z7G1-3;Q7Z7G1	Q92835-2;Q92835;Q92835-3;H0Y5Q9	Phosphatidylinositol 3,4,5-trisphosphate 5-phosphatase 1	INPP5D		+	0.239566	1.71334	60	60	58	64	133.19	323.31	0.205597	0.108223	0.306029	0.338415
W0HKK7;Q13291-2;Q13291-3;Q13291;Q96QJ2	W0HKK7;Q13291-2;Q13291-3;Q13291;Q96QJ2	Signaling lymphocytic activation molecule	SLAMF1		+	0.239539	1.47839	6	6	6	19.9	40.291	23.626	0.359379	0.256165	0.283448	0.0591642
A0A087WXC5;E7ESZ7;O95299;O95299-2;C9J6X0;Q8N1B9;H7C2W5;H7C1Y7;H7C2X4	A0A087WXC5;E7ESZ7;O95299;O95299-2;C9J6X0	NADH dehydrogenase [ubiquinone] 1 alpha subcomplex subunit 10, mitochondrial	NDUFA10			0.23927	0.706393	18	18	18	55.8	40.836	222.01	0.0249127	-0.0346184	0.409798	0.556987
Q9H2D1;E5RGK5;E5RFL3;E5RGT9	Q9H2D1	Mitochondrial folate transporter/carrier	SLC25A32			0.238374	1.06669	10	10	10	40	35.407	31.874	0.497507	0.0557509	0.24184	0.158397
O00488;A9J4F5	O00488;A9J4F5	Zinc finger protein 593	ZNF593			0.238291	0.200972	3	3	3	42.5	15.199	7.1716	0.391323	-0.557879	NaN	0.881428
P09960;P09960-4;P09960-2;P09960-3;B4DEH5	P09960;P09960-4;P09960-2;P09960-3	Leukotriene A-4 hydrolase	LTA4H			0.238253	0.660759	42	42	42	74.1	69.284	323.31	-0.112233	0.0862402	0.561888	0.417117
Q7RTS1	Q7RTS1	Class A basic helix-loop-helix protein 15	BHLHA15			0.23784	0.135361	5	5	5	37	20.818	24.314	1.4935	1.00913	-1.31714	-0.234133
Q8N2G8-3;Q8N2G8;K7ESN3;Q8N2G8-2;K7EQ41;K7EL54;K7EJT7	Q8N2G8-3;Q8N2G8;K7ESN3;Q8N2G8-2	GH3 domain-containing protein	GHDC			0.237778	0.483027	19	19	19	42.8	53.518	95.098	0.0368958	-0.218582	0.430821	0.701975
Q03113;Q03113-3;Q03113-2;E9PC54	Q03113;Q03113-3;Q03113-2;E9PC54	Guanine nucleotide-binding protein subunit alpha-12	GNA12			0.236579	0.670742	6	6	6	14.2	44.279	9.3414	-0.026021	0.372729	NaN	0.36303
K7ENI6;K7ERE1;Q8N2U0	K7ENI6;K7ERE1;Q8N2U0	Transmembrane protein 256	TMEM256			0.236312	0.239443	2	2	2	87.8	3.9694	11.537	-0.428785	0.343465	NaN	0.794257
O75995	O75995	SAM and SH3 domain-containing protein 3	SASH3		+	0.236213	2.09111	14	14	14	50.3	41.595	323.31	0.259651	0.126973	0.259785	0.298442
Q8N9Q2;A0A087WXZ8	Q8N9Q2;A0A087WXZ8	Protein SREK1IP1	SREK1IP1			0.2346	0.323209	4	4	4	20.6	18.177	9.593	-0.121546	-0.374917	0.592062	0.842801
E9PIZ0;C9JST7;A6NGW1;O95070	E9PIZ0;C9JST7;A6NGW1;O95070	Protein YIF1A	YIF1A		+	0.234582	1.34244	3	3	3	26.9	17.627	7.1839	0.115113	0.159112	0.435415	0.228689
O75083;O75083-3;D6RD66	O75083;O75083-3;D6RD66	WD repeat-containing protein 1	WDR1			0.234316	0.720356	34	34	34	69.3	66.193	323.31	-0.0243196	0.0139266	0.445621	0.502035
P06239;P06239-3;Q573B4;P06239-2;E9PJ92;E9PAP0;F8W6B9;E9PKQ8	P06239;P06239-3;Q573B4;P06239-2;E9PJ92;E9PAP0	Tyrosine-protein kinase Lck;Non-specific protein-tyrosine kinase	LCK			0.234272	0.995229	23	23	22	58.2	58	243.95	0.174572	-0.000663834	0.286763	0.476418
K7EMC9;Q969T9;B4DFG2;K7ENL2;A6NG10;K7EIJ0;K7EIN1;K7ESN4;K7EIK1	K7EMC9;Q969T9;B4DFG2;K7ENL2;A6NG10;K7EIJ0	WW domain-binding protein 2	WBP2			0.234243	0.527907	9	9	9	51.4	27.55	50.98	-0.137897	-0.0287342	0.601506	0.502096
O95182;M0R0N0;M0R1K9	O95182;M0R0N0	NADH dehydrogenase [ubiquinone] 1 alpha subcomplex subunit 7	NDUFA7			0.234141	0.704797	10	10	10	72.6	12.551	40.054	0.2041	-0.100175	0.239765	0.592876
P58166;F8VNP4	P58166	Inhibin beta E chain	INHBE			0.233962	0.895978	3	3	3	11.4	38.561	7.2619	0.173433	0.0558898	0.146264	0.56026
Q9Y6V7;Q9Y6V7-2;M0R1S3;M0QZC0;M0R0K1	Q9Y6V7	Probable ATP-dependent RNA helicase DDX49	DDX49			0.233159	0.550224	16	16	16	42.9	54.226	145.18	-0.0893626	-0.0487255	0.620305	0.450419
Q9NUQ7;D6RGX2;H0YA18;D6RB53;D6R9J7;D6RA67;H0Y9B0	Q9NUQ7;D6RGX2;H0YA18	Ufm1-specific protease 2	UFSP2			0.232839	0.84102	15	15	15	47.8	53.261	89.02	0.27026	-0.0994017	0.298658	0.461839
Q9Y5T5-2;Q9Y5T5-3	Q9Y5T5-2;Q9Y5T5-3	Ubiquitin carboxyl-terminal hydrolase 16	USP16			0.232556	0.604423	21	1	1	33.3	93.498	1.9133	0.23817	-0.0203551	NaN	0.479854
Q9H936;E9PJH7;A0A0D9SFE1;A0A0D9SEI9;K4DIB8;K4DIA8;K4DIB6;K4DIB3;E9PS95;E9PQ36;A0A0D9SFA8;K4DIB0;K4DIA2;A0A0D9SG84;E9PI74;E9PJY0;A0A0A6YYN8;Q9H1K4;K4DIB4	Q9H936;E9PJH7;A0A0D9SFE1;A0A0D9SEI9;K4DIB8;K4DIA8	Mitochondrial glutamate carrier 1	SLC25A22			0.232474	0.299136	17	17	17	71.8	34.47	183.5	0.907035	0.584	-0.369576	-0.191563
A0A087X1K6;Q9Y2Y9;H0YK05	A0A087X1K6;Q9Y2Y9	Krueppel-like factor 13	KLF13			0.230616	0.459123	5	5	5	24.5	31.225	9.8305	0.507911	-0.311005	0.126709	0.59885
Q6ZNJ1;Q6ZNJ1-2;H0Y764;H7C408;H7C354	Q6ZNJ1;Q6ZNJ1-2;H0Y764	Neurobeachin-like protein 2	NBEAL2			0.230175	0.436802	47	47	1	25.7	302.51	159.24	-0.104337	-0.183015	0.588517	0.619537
Q9Y6M7-6;Q9Y6M7-13;Q9Y6M7-7;Q9Y6M7-9;Q9Y6M7-8;Q9Y6M7-12;A0A0A0MST8;E9PFN4;Q9Y6M7-2;Q9Y6M7;Q9Y6M7-4;Q9Y6M7-3;C9JRP1;Q9Y6M7-11;H7C3C4;Q9Y6M7-14;Q9Y6M7-10;Q9Y6M7-5	Q9Y6M7-6;Q9Y6M7-13;Q9Y6M7-7;Q9Y6M7-9;Q9Y6M7-8;Q9Y6M7-12;A0A0A0MST8;E9PFN4;Q9Y6M7-2;Q9Y6M7;Q9Y6M7-4;Q9Y6M7-3;C9JRP1;Q9Y6M7-11;H7C3C4;Q9Y6M7-14;Q9Y6M7-10;Q9Y6M7-5	Sodium bicarbonate cotransporter 3;Anion exchange protein	SLC4A7			0.229851	0.355795	22	22	22	26.8	127.36	152.09	-0.0652966	-0.339948	0.559051	0.765597
A0A0A6YYI3;A0A0B4J1V8;Q9NQ55-2;Q9NQ55;Q9NQ55-3;A8MV53;C9J3W3;H7C446;C9JHF7	A0A0A6YYI3;A0A0B4J1V8;Q9NQ55-2;Q9NQ55;Q9NQ55-3;A8MV53	Suppressor of SWI4 1 homolog	PPAN-P2RY11;PPAN			0.229775	0.486813	13	13	13	25.2	58.199	90.765	0.0557112	-0.189483	0.326997	0.725876
O15265-3;O15265;O15265-2	O15265-3;O15265;O15265-2	Ataxin-7	ATXN7		+	0.229344	1.73646	4	4	4	7.5	79.534	3.3906	0.213487	0.184471	NaN	0.290074
Q86V21;Q86V21-2;Q86V21-3;E7EW25	Q86V21;Q86V21-2	Acetoacetyl-CoA synthetase	AACS			0.22917	0.383075	28	28	28	38.2	75.143	130.53	-0.215492	-0.163914	0.625177	0.670911
Q08209-2;Q08209-3;Q08209;E7ETC2;Q08209-4;Q08209-5;E9PPC8;E9PK68	Q08209-2;Q08209-3;Q08209;E7ETC2;Q08209-4;Q08209-5	Serine/threonine-protein phosphatase 2B catalytic subunit alpha isoform;Serine/threonine-protein phosphatase	PPP3CA			0.227838	0.464118	11	6	6	24.9	57.658	26.204	0.671278	0.455334	-0.210363	-0.00489682
P13995;P13995-2;B9A062;B8ZZU9	P13995;P13995-2;B9A062;B8ZZU9	Bifunctional methylenetetrahydrofolate dehydrogenase/cyclohydrolase, mitochondrial;NAD-dependent methylenetetrahydrofolate dehydrogenase;Methenyltetrahydrofolate cyclohydrolase	MTHFD2			0.227462	0.680803	32	32	32	80	37.895	323.31	0.123293	-0.105566	0.33182	0.560302
A0A0A0MS12;A0A0G2JPU1;A0A0C4DH40;A0A0G2JNA6;A0A0G2JN58;A0A0C4DH41;A0A0A0MS13	A0A0A0MS12;A0A0G2JPU1;A0A0C4DH40;A0A0G2JNA6;A0A0G2JN58;A0A0C4DH41;A0A0A0MS13		IGHV4-34;IGHV4-59;IGHV4-61;IGHV4-39			0.226935	1.013	3	3	3	26	13.815	69.756	0.247474	-0.0411945	0.298072	0.403389
O95249;E9PCW1;G5E9T8;K7EJC8;A0A087WYX5;B4DQA8;O95249-2;Q96QI9;F6RU00	O95249;E9PCW1;G5E9T8;K7EJC8;A0A087WYX5;B4DQA8;O95249-2	Golgi SNAP receptor complex member 1	GOSR1			0.22631	0.602243	14	14	14	58	28.612	51.949	-0.103263	0.0186342	0.555914	0.433954
Q8N5K1;D6RCF4;I3L1N9	Q8N5K1;D6RCF4	CDGSH iron-sulfur domain-containing protein 2	CISD2		+	0.226089	1.51844	6	6	6	45.9	15.278	95.013	0.310146	0.160017	0.0963968	0.337794
Q96NC0;R4GMX9;R4GNG8	Q96NC0;R4GMX9;R4GNG8	Zinc finger matrin-type protein 2	ZMAT2		+	0.225714	1.54395	4	4	4	13.6	23.612	6.0738	0.2316	0.36446	0.220701	0.0860938
Q96D70;K7EIG9;K7EN78	Q96D70;K7EIG9	R3H domain-containing protein 4	R3HDM4			0.225646	0.193956	4	4	4	24.6	30.349	14.931	-0.177854	-0.197236	NaN	1.05203
Q96DH6;B4DHE8;J3QKT5;B4DM51;Q96DH6-3;H0YHB7;O43347	Q96DH6;B4DHE8;J3QKT5;B4DM51;Q96DH6-3	RNA-binding protein Musashi homolog 2	MSI2			0.225394	0.422293	12	12	1	44.8	35.196	118.78	-0.228726	-0.0686044	0.614945	0.58396
O75394	O75394	39S ribosomal protein L33, mitochondrial	MRPL33			0.22461	0.417509	3	3	3	50.8	7.6191	11.581	-0.188654	-0.121926	0.580724	0.628296
C9IYN3;D6W592;Q8WVV9-4;Q8WVV9;B7WPG3;Q8WVV9-5;H7C464;Q8WVV9-3;Q8WVV9-2;H7BXH8;C9JJZ7	C9IYN3;D6W592;Q8WVV9-4;Q8WVV9;B7WPG3;Q8WVV9-5	Heterogeneous nuclear ribonucleoprotein L-like	HNRNPLL;HNRPLL		+	0.224592	1.68072	24	23	23	60.9	59.663	122.85	0.358861	0.116365	0.221815	0.201327
Q9Y3Z3;Q9Y3Z3-2;Q9Y3Z3-4;Q9Y3Z3-3	Q9Y3Z3;Q9Y3Z3-2;Q9Y3Z3-4;Q9Y3Z3-3	Deoxynucleoside triphosphate triphosphohydrolase SAMHD1	SAMHD1			0.224466	0.636252	30	30	30	59.1	72.2	161.81	0.0611195	-0.0948339	0.355467	0.57611
Q8TEQ8-2;Q8TEQ8	Q8TEQ8-2;Q8TEQ8	GPI ethanolamine phosphate transferase 3	PIGO			0.224422	0.442233	7	7	7	14	73.992	19.281	-0.0581087	-0.1778	0.413269	0.720327
P23469-3;P23469-2;P23469;S4R2Y5	P23469-3;P23469-2;P23469	Receptor-type tyrosine-protein phosphatase epsilon	PTPRE			0.224271	0.565325	4	4	4	9.6	71.381	15.909	0.509943	0.491391	0.0688771	-0.173127
P00403	P00403	Cytochrome c oxidase subunit 2	MT-CO2			0.224068	0.377298	6	6	6	27.8	25.565	63.312	-0.0024506	-0.288347	0.364797	0.822273
P03886	P03886	NADH-ubiquinone oxidoreductase chain 1	MT-ND1			0.223697	0.42713	2	2	2	6.3	35.66	23.745	0.567105	-0.150513	-0.144712	0.62291
Q9UL25	Q9UL25	Ras-related protein Rab-21	RAB21			0.223442	0.99652	12	12	12	60.4	24.347	288.04	0.0659742	0.0607391	0.326652	0.4404
A0A0A0MT83;P26440;P26440-2;H7C4G6;H0YLC3;H0YN10;H0YKV0;A0A087WVD3	A0A0A0MT83;P26440;P26440-2;H7C4G6	Isovaleryl-CoA dehydrogenase, mitochondrial	IVD			0.223247	0.300887	21	21	21	62.4	46.65	323.01	-0.252537	-0.305467	0.645886	0.805106
Q7Z6I6;A0A0A0MRJ9;Q7Z6I6-2;Q7Z6I6-4;Q7Z6I6-3;A0A0A0MRJ8;E9PLT5;G3V174;A7KAX9-3;Q2M1Z3;A7KAX9-2;A7KAX9	Q7Z6I6;A0A0A0MRJ9;Q7Z6I6-2;Q7Z6I6-4	Rho GTPase-activating protein 30	ARHGAP30			0.223232	0.976646	14	14	14	14.7	118.58	40.859	0.0918787	0.0227584	0.412511	0.365779
Q7Z406;Q7Z406-6;Q7Z406-2;Q7Z406-5;Q7Z406-4;M0QY43	Q7Z406;Q7Z406-6;Q7Z406-2;Q7Z406-5;Q7Z406-4;M0QY43	Myosin-14	MYH14			0.223164	1.08983	14	1	1	5.9	227.87	2.2757	0.0547818	0.110497	0.429964	0.297413
M0R226;Q9BQ48	M0R226;Q9BQ48	Ribosomal protein L34;39S ribosomal protein L34, mitochondrial	MRPL34			0.2228	0.536133	3	3	3	13	19.802	12.098	-0.153286	0.0117819	0.461319	0.571386
Q9BPX5	Q9BPX5	Actin-related protein 2/3 complex subunit 5-like protein	ARPC5L			0.222257	0.765084	13	13	12	70.6	16.941	135.47	-0.0709388	0.141564	0.51662	0.301781
P25774;P25774-2;U3KPS4;U3KQE7	P25774;P25774-2;U3KPS4	Cathepsin S	CTSS			0.222123	0.79277	10	10	10	46.8	37.495	71.833	0.118304	-0.0494122	0.315682	0.503916
D6RIE3;D6RGV5;H0UI06;P14406;D6R9C3	D6RIE3;D6RGV5;H0UI06;P14406;D6R9C3	Cytochrome c oxidase subunit 7A2, mitochondrial	COX7A2			0.221948	0.356744	2	2	2	25.3	10.264	6.7406	0.0406304	-0.386921	0.488001	0.746083
Q96N64-3;Q96N64-2;Q96N64	Q96N64-3;Q96N64-2;Q96N64	PWWP domain-containing protein 2A	PWWP2A			0.221823	0.920011	2	2	2	5.2	56.314	10.781	NaN	0.127105	0.147437	0.390926
P09497-2;P09497;D6RJD1;H0Y9Q6	P09497-2;P09497	Clathrin light chain B	CLTB			0.221595	1.02273	10	10	10	35.5	23.181	18.5	0.051773	0.0779266	0.415218	0.341464
A0A0G2JQL4;A0A075B6N9;A0A087X2C0;A0A087WYJ9;P01871;P01871-2;P04220	A0A0G2JQL4;A0A075B6N9;A0A087X2C0;A0A087WYJ9;P01871;P01871-2;P04220	Ig mu chain C region;Ig mu heavy chain disease protein	IGHM			0.220965	0.526018	23	23	23	62.4	49.382	323.31	0.360712	-0.261033	0.217975	0.566207
O95486;O95486-2;H0Y9J6	O95486	Protein transport protein Sec24A	SEC24A		+	0.220828	1.82885	23	22	22	25.9	119.75	133.65	0.176218	0.17594	0.179638	0.351516
Q9P287-2;Q9P287-4	Q9P287-2;Q9P287-4	BRCA2 and CDKN1A-interacting protein	BCCIP		+	0.220134	1.50009	13	4	4	46.9	36.214	19.412	0.340002	0.16092	0.0893625	0.290251
G3V529;Q9GZR7;Q9GZR7-2;F5GYL3;A0A087WXU8	G3V529;Q9GZR7;Q9GZR7-2;F5GYL3;A0A087WXU8	ATP-dependent RNA helicase DDX24	DDX24			0.219797	0.542549	31	31	31	47.4	91.48	246.66	0.212083	-0.239021	0.335597	0.570529
Q93050-1;Q93050;Q93050-3;B7Z641;B7Z2A9;K7EM24;K7EPG4;K7EN36;F5H1T6;K7ELZ6;K7EQW2;K7ERA0;K7ERA6;Q9HBG4	Q93050-1;Q93050;Q93050-3;B7Z641;B7Z2A9	V-type proton ATPase 116 kDa subunit a isoform 1;V-type proton ATPase subunit a	ATP6V0A1			0.219698	0.361267	18	18	18	27.7	95.755	120.31	0.00241124	-0.348152	0.470927	0.753604
Q9H3C7;A0A087X1D7;Q9H3C7-2;Q9H3C7-3	Q9H3C7;A0A087X1D7;Q9H3C7-2;Q9H3C7-3	Gametogenetin-binding protein 2	GGNBP2			0.219619	0.340613	3	3	3	7.3	79.086	41.575	-0.0829751	0.0486547	NaN	0.693178
D6RDH9;D6RJG9;Q9Y5W7-2;Q9Y5W7-3;Q9Y5W7-4;Q9Y5W7;D6RBA7;H0Y926;D6RDA6	D6RDH9;D6RJG9;Q9Y5W7-2;Q9Y5W7-3;Q9Y5W7-4;Q9Y5W7	Sorting nexin-14	SNX14			0.219537	0.989378	4	4	4	6.2	77.942	3.0936	0.292334	0.443395	0.0102069	0.132214
O75915;F8WF90;C9JQU6;F8WF33	O75915;F8WF90;C9JQU6;F8WF33	PRA1 family protein 3	ARL6IP5			0.218876	0.86345	8	8	8	34.6	21.614	89.966	0.173498	-0.0640726	0.332164	0.433916
Q9NWS6;B0QY29;B0QY28;Q9NWS6-2	Q9NWS6;B0QY29	Protein FAM118A	FAM118A			0.218843	0.94276	4	4	4	17.1	40.269	8.2414	0.23343	0.289362	0.409581	-0.0569997
O95620-2;O95620	O95620-2;O95620	tRNA-dihydrouridine(20a/20b) synthase [NAD(P)+]-like	DUS4L			0.218777	0.302703	2	2	2	14.3	22.226	3.1917	0.380709	-0.302102	NaN	0.577724
Q9Y5J6;F2Z2B0	Q9Y5J6	Mitochondrial import inner membrane translocase subunit Tim10 B	TIMM10B			0.218744	0.428102	6	6	6	56.3	11.586	19.205	0.633591	0.522257	-0.0932325	-0.187641
J3QRG5;J3KSJ5;Q9BQA9-2;Q9BQA9;J3KTF4;J3QKS6;J3QRZ2;J3QLB7;J3QQQ4;J3QS53;J3QKZ6;H0Y2X1;J3KTI1;J3KSB6;J3KS78	J3QRG5;J3KSJ5;Q9BQA9-2;Q9BQA9;J3KTF4;J3QKS6;J3QRZ2;J3QLB7	Uncharacterized protein C17orf62	C17orf62			0.217573	0.755938	6	6	6	41.9	16.754	43.839	0.0786247	-0.0435419	0.332622	0.502587
Q9Y478;F5H2X8;F5H4Y8;F5H610	Q9Y478	5-AMP-activated protein kinase subunit beta-1	PRKAB1			0.217329	0.693765	10	10	9	65.2	30.382	61.949	-0.0803848	0.122076	0.554245	0.273378
E9PHY5;O43491;O43491-4;E9PK52;O43491-3;E9PII3;O43491-2;I6L9B1;Q6R5J7;H0Y5B0;E9PQD2;E9PRG1;E9PIG0;E9PQN0;Q6ZSX4;E9PMV8;E9PJP4;E9PN54;E9PPC9;E9PMG5;J3QS55;J3QS83	E9PHY5;O43491;O43491-4;E9PK52;O43491-3;E9PII3;O43491-2;I6L9B1	Band 4.1-like protein 2	EPB41L2			0.217089	1.01195	49	49	43	62.5	104.36	323.31	0.104542	0.0199154	0.374845	0.369054
P34059;H3BP66	P34059	N-acetylgalactosamine-6-sulfatase	GALNS		+	0.216965	1.83363	3	3	3	6.3	58.025	7.1856	0.34161	0.197991	0.177089	0.15117
Q8IWV7;A0A087WTJ9;Q8IWV7-2;H3BUC4;H3BUZ4;H3BQF8;A0A0C4DGM0	Q8IWV7;A0A087WTJ9	E3 ubiquitin-protein ligase UBR1	UBR1			0.216857	0.899833	26	26	26	18.2	200.21	89.001	0.0882855	-0.00355341	0.365581	0.417117
Q13085;Q13085-4;Q13085-2;Q59FY4;A0A0C4DGT1;A0A0G2JM60;F8W8T8;H0YGH5;A0A087X2F8;A0A087X126;A0A087WYK6;S4R3S7;A0A087WWN5;A0A087WYS8	Q13085;Q13085-4;Q13085-2;Q59FY4	Acetyl-CoA carboxylase 1;Biotin carboxylase	ACACA			0.216849	0.329428	122	122	5	63.7	265.55	323.31	-0.204516	-0.265431	0.621337	0.716007
Q15058	Q15058	Kinesin-like protein KIF14	KIF14			0.216441	0.529128	15	15	15	10.3	186.49	25.131	-0.0655722	-0.0946645	0.51248	0.513522
Q8NBS9;Q86UY0;Q8NBS9-2	Q8NBS9;Q86UY0;Q8NBS9-2	Thioredoxin domain-containing protein 5	TXNDC5		+	0.216399	2.81466	32	32	32	76.9	47.628	323.31	0.216753	0.163885	0.256165	0.228791
O15145;C9JZD1;F8VR50	O15145	Actin-related protein 2/3 complex subunit 3	ARPC3			0.216371	0.919294	14	14	14	76.4	20.546	219.7	0.0669713	0.0281448	0.328147	0.442222
Q9UBP6;H0YIH0;F8VSD9;H0YHX0;Q9UBP6-2;H0YHU4	Q9UBP6	tRNA (guanine-N(7)-)-methyltransferase	METTL1			0.216144	1.24677	10	10	10	38.4	31.471	48.724	0.160363	0.049352	0.274172	0.38069
O43865;O43865-2	O43865;O43865-2	Putative adenosylhomocysteinase 2	AHCYL1			0.216081	0.701594	22	22	11	44.9	58.951	137.89	0.0169206	-0.0374584	0.464564	0.420299
Q9Y613;H3BVE7;J3KTH7	Q9Y613	FH1/FH2 domain-containing protein 1	FHOD1			0.216063	0.852915	33	33	33	39.5	126.55	189.04	0.0483375	0.0227584	0.324465	0.468691
Q5TZA2;B1AKD8;Q5TZA2-2;A0A087WU09;Q8IVE0	Q5TZA2;B1AKD8	Rootletin	CROCC			0.216013	0.609185	13	13	4	6.5	228.52	18.214	0.00824686	0.0648829	0.66029	0.130634
J3QS41;P42694-2;A0A075B6R3;J3KT20;J3QRR8;J3KS59	J3QS41;P42694-2	Probable helicase with zinc finger domain	HELZ			0.215938	0.404305	35	35	1	25	219.05	144.04	-0.178109	-0.133385	0.502127	0.673118
E7EQ34;O14653;O14653-2;O14653-3;I3L4Z6;I3L1K7;I3L0K1;I3L3V4;I3NI02	E7EQ34;O14653;O14653-2;O14653-3;I3L4Z6;I3L1K7;I3L0K1;I3L3V4	Golgi SNAP receptor complex member 2	GOSR2			0.215615	0.641789	12	12	12	62.1	26.864	135.35	-0.0203421	-0.0414171	0.488001	0.436217
Q9BSH4	Q9BSH4	Translational activator of cytochrome c oxidase 1	TACO1			0.215571	0.396602	15	15	15	57.9	32.477	288.35	-0.107018	-0.222885	0.591392	0.600796
Q7Z6M1;Q7Z6M1-2;Q5T1S5;Q5T1S4	Q7Z6M1;Q7Z6M1-2	Rab9 effector protein with kelch motifs	RABEPK			0.215507	0.731614	12	12	12	53	40.564	41.753	-0.145221	0.232538	0.367483	0.40723
X6R5E5;Q8NBM4;Q8NBM4-4;Q8NBM4-3;Q8NBM4-2;Q8NBM4-5	X6R5E5;Q8NBM4;Q8NBM4-4;Q8NBM4-3;Q8NBM4-2	Ubiquitin-associated domain-containing protein 2	UBAC2			0.215455	0.673281	5	5	5	26.5	23.074	8.5944	0.409719	-0.164739	0.41684	0.200001
Q8TCC3;Q8TCC3-2;Q8TCC3-3;B8ZZV5	Q8TCC3;Q8TCC3-2;Q8TCC3-3	39S ribosomal protein L30, mitochondrial	MRPL30			0.214823	0.791151	5	5	5	39.1	18.546	43.416	0.167086	-0.0527154	0.23352	0.511403
P21399;F5H2R8;F5H143;F5H3Z7;E9PEF1;O00408-5;O00408-4;O00408-3;O00408	P21399	Cytoplasmic aconitate hydratase	ACO1			0.214753	0.458232	33	33	33	47.7	98.398	233.79	0.458148	-0.204881	-0.0123299	0.618074
H7BXI1;A0FGR8-6;A0A087WXU3;A0FGR8-2;A0FGR8;A0FGR8-4;A0FGR8-5	H7BXI1;A0FGR8-6;A0A087WXU3;A0FGR8-2;A0FGR8;A0FGR8-4	Extended synaptotagmin-2	ESYT2			0.214738	0.589662	22	22	22	31.7	98.008	133.79	0.0966685	-0.158961	0.391108	0.530135
Q9HD20-2;Q9HD20;Q9HD20-3;H7C3H2	Q9HD20-2;Q9HD20	Manganese-transporting ATPase 13A1	ATP13A1			0.214446	0.430062	32	32	32	38.8	121.11	213.4	-0.00748264	-0.237234	0.446468	0.656035
Q8WY91-2;Q8WY91;B5MCC0	Q8WY91-2;Q8WY91;B5MCC0	THAP domain-containing protein 4	THAP4			0.214342	0.451644	3	3	3	24.8	18.627	14.213	-0.152638	-0.0951113	0.538439	0.566677
Q9Y2I8;Q9Y2I8-2;C9JGR9;E7EQ49;A0A087WTQ2;Q9Y2I8-3	Q9Y2I8;Q9Y2I8-2	WD repeat-containing protein 37	WDR37			0.214202	0.476457	7	7	7	18	54.665	27.674	-0.1145	-0.0786856	0.402504	0.64749
A0A075B738;P16284-3;P16284-2;P16284-6;P16284;P16284-5;P16284-4;A0A075B727;A0A075B728;A0A075B737	A0A075B738;P16284-3;P16284-2;P16284-6;P16284;P16284-5;P16284-4	Platelet endothelial cell adhesion molecule	PECAM1			0.214013	0.204022	13	13	13	24	82.521	45.216	-0.156267	-0.681284	0.594262	1.09934
P61158;B4DXW1;F8WDR7;Q9P1U1-2;Q9P1U1;Q9P1U1-3;C9IZN3;F8WEW2;F8WE84	P61158;B4DXW1	Actin-related protein 3	ACTR3			0.213555	0.91396	32	32	29	72	47.371	323.31	0.0421004	0.0409626	0.361207	0.409949
P09669	P09669	Cytochrome c oxidase subunit 6C	COX6C			0.213146	0.420098	7	7	7	50.7	8.7813	7.4415	0.0100908	-0.2684	0.485736	0.625155
P19525;P19525-2;C9JZT2;F8WBH4	P19525;P19525-2	Interferon-induced, double-stranded RNA-activated protein kinase	EIF2AK2		+	0.2129	2.57503	22	22	22	40.3	62.094	107.18	0.248622	0.179256	0.256165	0.167555
P04066	P04066	Tissue alpha-L-fucosidase	FUCA1			0.212797	0.588708	10	10	10	25.3	53.688	24.659	-0.0963969	0.000576887	0.432746	0.514264
A0A0A0MRV0;Q9P2E9;Q9P2E9-2;A0A087WVV2;Q9P2E9-3;F8W7S5;A0A087WU26;A2A2S5;V9GY78	A0A0A0MRV0;Q9P2E9;Q9P2E9-2;A0A087WVV2;Q9P2E9-3;F8W7S5	Ribosome-binding protein 1	RRBP1			0.212728	0.542413	52	52	51	39.6	152.45	323.31	0.578585	0.399007	-0.109188	-0.0174944
Q96H55;Q96H55-3;Q96H55-4;Q96H55-2;A0A087WZQ9;A0A087WU55;A0A087WY49;B4DSL5;A0A087WYT7	Q96H55;Q96H55-3;Q96H55-4;Q96H55-2	Unconventional myosin-XIX	MYO19			0.212652	0.836435	11	11	11	17.7	109.13	47.731	0.262417	-0.0712545	0.20389	0.455554
P17858;P17858-2	P17858;P17858-2	ATP-dependent 6-phosphofructokinase, liver type	PFKL		+	0.212209	1.88011	37	31	31	59.7	85.018	323.31	0.160927	0.331935	0.179511	0.176463
Q9P2R3;Q9P2R3-2;Q9P2R3-4;I3L3P8;K7EPT2;I3L1Z9	Q9P2R3;Q9P2R3-2;Q9P2R3-4	Rabankyrin-5	ANKFY1			0.211882	0.573287	42	42	42	50.9	128.4	323.31	-0.0935602	-0.0194774	0.496718	0.463848
Q99805	Q99805	Transmembrane 9 superfamily member 2	TM9SF2			0.211614	0.769338	13	13	13	26.1	75.775	84.696	0.291257	-0.124016	0.254352	0.424862
Q8IZH2-2;Q8IZH2;H7C5E4;Q8IZH2-3;F8WDA0;H7C583;C9JCZ8	Q8IZH2-2;Q8IZH2;H7C5E4	5-3 exoribonuclease 1	XRN1			0.211493	0.637413	35	35	35	26.7	192.84	174.03	-0.0482362	-0.0159138	0.438293	0.471829
Q9Y5M8;H7C4H2;C9J5Z8	Q9Y5M8;H7C4H2	Signal recognition particle receptor subunit beta	SRPRB			0.211428	0.854854	17	17	17	60.5	29.702	135.58	0.149585	-0.0471148	0.292664	0.450577
Q13415	Q13415	Origin recognition complex subunit 1	ORC1			0.211339	0.35877	12	12	12	16	97.349	49.733	-0.0275787	-0.337995	0.567253	0.643676
Q9H668	Q9H668	CST complex subunit STN1	OBFC1			0.211306	0.908525	6	6	6	17.4	42.119	21.287	0.351719	0.214622	NaN	0.0675758
Q9P0M9;D6RAN8;H7C5U8;D6RE11;B3KN43	Q9P0M9;D6RAN8;H7C5U8	39S ribosomal protein L27, mitochondrial	MRPL27			0.210557	0.567196	7	7	7	50.7	16.073	52.243	0.0638615	-0.13887	0.342782	0.574455
P53384-2;P53384;I3L3A0;I3L518;I3L531	P53384-2;P53384	Cytosolic Fe-S cluster assembly factor NUBP1	NUBP1			0.210322	0.821983	9	9	9	40.8	33.412	82.037	0.132009	-0.0562061	0.321928	0.443556
A0A087WXS7;O43681;K7ERW9	A0A087WXS7;O43681;K7ERW9	ATPase ASNA1	ASNA1			0.21023	0.552466	13	13	13	52.9	37.119	125.27	0.00743454	-0.106933	0.347326	0.593093
G3V2B1;G3V519;G3V4M0;H0YM52;G3V4P4;G3V3Z0;G3V499;G3V2G7;P49768-4;P49768-3;P49768-5;P49768-6;P49768-7;P49768-2;P49768;G3V5B1;G3V3P0;G3V449	G3V2B1;G3V519;G3V4M0;H0YM52;G3V4P4;G3V3Z0;G3V499;G3V2G7;P49768-4;P49768-3;P49768-5;P49768-6;P49768-7;P49768-2;P49768;G3V5B1;G3V3P0;G3V449	Presenilin-1;Presenilin-1 NTF subunit;Presenilin-1 CTF subunit;Presenilin-1 CTF12	PSEN1			0.21018	0.402292	2	2	2	37.4	10.462	20.624	0.339181	-0.209545	-0.0369106	0.747996
Q13029-5;Q13029-3;Q13029-2;Q13029	Q13029-5;Q13029-3;Q13029-2;Q13029	PR domain zinc finger protein 2	PRDM2			0.210077	0.362939	6	6	6	3.6	162.11	10.192	0.246259	0.565012	NaN	-0.181039
Q9Y6X5;Q6UWV6	Q9Y6X5	Bis(5-adenosyl)-triphosphatase ENPP4	ENPP4			0.210034	0.608123	13	13	13	35.1	51.641	75.319	0.0932017	-0.118476	0.298541	0.56687
Q9BXB4	Q9BXB4	Oxysterol-binding protein-related protein 11	OSBPL11			0.21002	0.698458	19	18	18	30.9	83.642	59.723	-0.0360461	0.0318186	0.509645	0.334662
Q9P219;Q9P219-2;Q9P219-3;A0A0A0MR69;Q0P665;G3V3S0	Q9P219	Protein Daple	CCDC88C			0.209864	1.15461	57	57	56	34.9	228.23	242.54	0.100886	0.0579701	0.352871	0.327729
Q9NZL4;Q9NZL4-3;Q9NZL4-2;K7EL16;K7EN20;K7ERT9;K7EKM6;K7EMM7	Q9NZL4;Q9NZL4-3;Q9NZL4-2	Hsp70-binding protein 1	HSPBP1			0.209801	1.01934	15	15	15	52.5	39.474	148.89	0.0030184	0.131985	0.385155	0.319046
Q9NPI6-2;Q9NPI6;A0A087WT55;A0A087WXD0;A0A087WVE6	Q9NPI6-2;Q9NPI6	mRNA-decapping enzyme 1A	DCP1A			0.209655	0.5576	16	16	16	47.1	59.361	195.44	-0.0885487	-0.0342046	0.430821	0.530552
P51148;P51148-2;K7ENY4;K7EIP6	P51148;P51148-2	Ras-related protein Rab-5C	RAB5C			0.209473	0.498511	11	11	5	73.1	23.482	209.54	-0.012211	-0.15457	0.417596	0.587078
P51397;B4DQ75	P51397	Death-associated protein 1	DAP			0.209453	0.829604	4	4	4	55.9	11.164	8.7145	0.342781	0.158208	-0.0728773	0.4097
P30085;Q5T0D2;P30085-2;E9PJD2	P30085;Q5T0D2;P30085-2	UMP-CMP kinase	CMPK1			0.209356	0.658431	17	17	17	70.4	22.222	209.06	-0.0694271	0.0253123	0.463518	0.418022
Q9Y5S1;H7BZK2;K7ELL3;K7EKG5	Q9Y5S1;H7BZK2	Transient receptor potential cation channel subfamily V member 2	TRPV2			0.208987	0.303491	10	10	10	15.2	85.98	26.084	0.22233	-0.475294	0.236585	0.852329
O15143;C9J4Z7;F8VXW2;C9JEY1;C9JQM8;C9JFG9;C9J6C8;C9JBJ7;C9K057;C9JTT6;C9JM51;F8WEB3	O15143	Actin-related protein 2/3 complex subunit 1B	ARPC1B			0.208641	0.803731	24	24	22	67.7	40.949	323.31	0.00668065	0.0270125	0.421587	0.379282
Q8TCJ2	Q8TCJ2	Dolichyl-diphosphooligosaccharide--protein glycosyltransferase subunit STT3B	STT3B			0.208407	0.684792	16	15	15	17.3	93.673	68.415	0.213286	-0.11652	0.217975	0.518887
Q13867;K7ES02;K7ESE8;J3KSD8;J3KS79;K7ENH5;K7EMJ3	Q13867;K7ES02;K7ESE8;J3KSD8	Bleomycin hydrolase	BLMH			0.208261	0.493894	34	34	34	79.3	52.562	323.31	-0.189666	0.0367495	0.591967	0.393994
Q9NUU7;I3L0H8;H3BTB3;J3QRH0;H3BSL8;H3BP36;H3BP50	Q9NUU7;I3L0H8	ATP-dependent RNA helicase DDX19A	DDX19A			0.208136	0.701492	32	32	5	72.2	53.974	323.31	-0.0306892	0.00992034	0.444667	0.408646
O00635	O00635	E3 ubiquitin-protein ligase TRIM38	TRIM38			0.208121	0.803439	9	9	9	24.9	53.415	28.179	-0.00547193	0.0433446	0.437654	0.356957
O96007	O96007	Molybdopterin synthase catalytic subunit	MOCS2			0.207821	0.914085	4	4	4	28.7	20.944	22.695	0.313889	-0.0827897	0.315218	0.284968
Q9NWQ8	Q9NWQ8	Phosphoprotein associated with glycosphingolipid-enriched microdomains 1	PAG1		+	0.207694	1.38189	13	13	13	39.8	46.98	83.605	0.354944	0.0941009	0.124461	0.257269
G3V0I5;P49821-2;P49821;B4DE93;E9PQP1;E9PLC6;E9PMX3;E9PJL9;H0YE81;E9PPR0;E9PPS5;E9PPD6;H0YD04	G3V0I5;P49821-2;P49821;B4DE93	NADH dehydrogenase [ubiquinone] flavoprotein 1, mitochondrial	NDUFV1			0.207426	0.954543	24	24	24	64.3	50.054	253.93	0.140778	-0.0227567	0.328607	0.383078
O94915;F2Z2S2;H0Y9X0;D6RJI4;O94915-2;D6R9B9	O94915;F2Z2S2	Protein furry homolog-like	FRYL			0.207359	0.565147	60	60	57	26.9	339.59	285.84	0.0153742	-0.126407	0.462785	0.477683
Q96HC4;Q96HC4-7;Q96HC4-4;Q96HC4-6;H0Y8Y3;Q96HC4-3;Q96HC4-2;H0YBI4;A0A0D9SFR4;A0A0A0MSP3;H0Y929;D6RAA1;A0A0D9SFW3;D6RGG6;Q96HC4-5	Q96HC4;Q96HC4-7;Q96HC4-4;Q96HC4-6;H0Y8Y3	PDZ and LIM domain protein 5	PDLIM5			0.20734	0.359989	18	18	18	34.7	63.944	53.001	-0.0918015	-0.271757	0.492725	0.700193
Q8WYN0;G5E979;H7BYM2;Q8WYN0-3;Q8WYN0-2;Q8WYN0-5;A0A0A0MT61	Q8WYN0;G5E979;H7BYM2;Q8WYN0-3;Q8WYN0-2;Q8WYN0-5;A0A0A0MT61	Cysteine protease ATG4A	ATG4A			0.207248	0.466843	4	4	4	10.8	45.377	9.1625	0.289422	-0.291221	0.237809	0.592985
Q5QJ74;E9PP54	Q5QJ74;E9PP54	Tubulin-specific chaperone cofactor E-like protein	TBCEL			0.207244	0.219799	3	3	3	8	48.194	5.9453	0.394601	-0.450065	NaN	0.677195
Q9P2K3-4;Q9P2K3;Q9P2K3-3;B4DV59;Q9P2K3-2;E9PQE5;H0YF22;E9PR63;H0YDD7;H0YDR8	Q9P2K3-4;Q9P2K3;Q9P2K3-3;B4DV59;Q9P2K3-2;E9PQE5	REST corepressor 3	RCOR3			0.207174	0.828658	9	5	5	24.5	50.376	8.7342	0.0439284	0.355129	NaN	0.222465
Q9ULQ1-3;B7Z3R2;Q9ULQ1;H0YIK4;Q9ULQ1-2;F8VZZ6;F8VVY9;F8W0P9	Q9ULQ1-3;B7Z3R2;Q9ULQ1	Two pore calcium channel protein 1	TPCN1			0.205831	0.631552	6	6	6	9.5	101.79	30.898	0.12863	-0.136934	0.320658	0.510971
Q8N2K0;Q8N2K0-2;Q8N2K0-3;I3L294;I3L440;Q5T712;I3L1V0;I3L380	Q8N2K0;Q8N2K0-2;Q8N2K0-3;I3L294	Monoacylglycerol lipase ABHD12	ABHD12			0.20549	0.790086	11	11	11	41	45.096	43.705	0.380183	-0.0938791	0.165687	0.369967
Q8IYA6;Q8IYA6-3;Q8IYA6-2;F8WBE0	Q8IYA6;Q8IYA6-3;Q8IYA6-2	Cytoskeleton-associated protein 2-like	CKAP2L			0.205372	0.721919	6	6	6	8.6	83.586	6.22	0.172669	-0.125384	0.367147	0.407058
Q9ULC3	Q9ULC3	Ras-related protein Rab-23	RAB23			0.205177	0.569185	5	5	5	35.4	26.659	23.396	0.132309	0.015212	0.46801	NaN
Q96CS3;D6RBG6	Q96CS3	FAS-associated factor 2	FAF2			0.204644	0.833508	21	21	21	51.7	52.623	184.18	0.0942794	-0.0287489	0.317999	0.435046
P14625;Q96GW1;Q58FF3;H0YIV0;F8W026	P14625	Endoplasmin	HSP90B1			0.204334	1.02597	61	59	59	70.1	92.468	323.31	0.207195	-0.0147619	0.228234	0.396669
Q13395	Q13395	Probable methyltransferase TARBP1	TARBP1			0.204165	0.647858	13	13	13	11.5	181.67	40.341	-0.0102069	0.0958569	0.595408	0.135602
O15455;D6RA51;O15455-2	O15455;D6RA51;O15455-2	Toll-like receptor 3	TLR3			0.204136	0.0820058	5	5	5	7.1	103.83	11.545	-0.438506	-0.793232	NaN	1.84415
Q8NI37	Q8NI37	Protein phosphatase PTC7 homolog	PPTC7			0.203958	0.442787	6	6	6	31.6	32.645	29.403	-0.0315363	-0.16762	0.344147	0.670842
I3L0N3;P46459;P46459-2;I3L2G1;I3L0L3;K7EQD6;I3L338;I3L4Q9	I3L0N3;P46459;P46459-2	Vesicle-fusing ATPase	NSF			0.203824	0.411154	49	49	48	68.2	82.091	323.31	-0.0565835	-0.217072	0.459851	0.629099
Q9BZE4;Q9BZE4-2;Q9BZE4-3;Q5T3R7	Q9BZE4;Q9BZE4-2;Q9BZE4-3	Nucleolar GTP-binding protein 1	GTPBP4			0.203568	0.401403	36	36	36	57.9	73.964	264.64	0.130255	-0.308323	0.305329	0.68701
A0A075B6K9;P0CG05;A0A075B6L0;P0CF74;P0CG06;A0A075B6K8;A0A0B4J231;A0A087WWC9;A0A087WXC3;A0A087WWU7;A0A087WYN7;A0A087WWT5;A0A087WU42;A0A087X2A1;A0A087WYR4;A0A087WX49;P0CG04;B9A064;A0A075B6L1;A0M8Q6	A0A075B6K9;P0CG05;A0A075B6L0;P0CF74;P0CG06;A0A075B6K8;A0A0B4J231;A0A087WWC9;A0A087WXC3;A0A087WWU7;A0A087WYN7;A0A087WWT5;A0A087WU42;A0A087X2A1;A0A087WYR4;A0A087WX49;P0CG04;B9A064	Ig lambda-2 chain C regions;Ig lambda-6 chain C region;Ig lambda-3 chain C regions;Ig lambda-1 chain C regions;Immunoglobulin lambda-like polypeptide 5	IGLC2;IGLC3;IGLC6;IGLC1;IGLL5			0.203381	0.569957	5	5	5	58.5	11.236	125.55	0.261656	-0.19484	0.212632	0.534078
Q7KYR7-5;Q7KYR7;Q7KYR7-1;Q7KYR7-6;Q7KYR7-4;Q7KYR7-3;Q8WVV5;C9JNC3;H7BYC3;C9IY66;Q8WVV5-3;Q8WVV5-2;H7C542;C9JAJ6;Q8WVV5-5;Q8WVV5-4	Q7KYR7-5;Q7KYR7;Q7KYR7-1;Q7KYR7-6;Q7KYR7-4;Q7KYR7-3	Butyrophilin subfamily 2 member A1	BTN2A1			0.203287	0.464732	7	7	7	21.5	53.203	31.416	-0.165558	-0.0403337	0.439357	0.579685
O15144;H7C3F9;C9JTV5;G5E9J0;G5E9S7	O15144	Actin-related protein 2/3 complex subunit 2	ARPC2			0.20317	0.895898	26	26	26	80.3	34.333	323.31	-0.0200577	0.109427	0.405992	0.317319
O95168;C9JXQ9;O95168-2;F2Z3P9	O95168;C9JXQ9;O95168-2;F2Z3P9	NADH dehydrogenase [ubiquinone] 1 beta subcomplex subunit 4	NDUFB4			0.202898	0.583591	8	8	8	54.3	15.208	44.113	0.0960363	-0.141001	0.311387	0.545171
Q01167;Q01167-2;A0A087WXM0;Q01167-3;E9PPI7;E9PM37;I3L4U8	Q01167;Q01167-2;A0A087WXM0	Forkhead box protein K2	FOXK2			0.202766	0.382239	14	12	12	22.6	69.061	44.035	-0.0641931	-0.251213	0.473319	0.653151
Q9UEY8-2;Q9UEY8;A0A087WX08	Q9UEY8-2;Q9UEY8;A0A087WX08	Gamma-adducin	ADD3			0.202671	0.478896	8	8	8	15.1	75.67	63.827	0.0337911	0.0163537	0.72927	0.0312679
P52292;J3QLL0;J3KS65;J3QL07	P52292	Importin subunit alpha-1	KPNA2			0.202519	0.355762	27	27	27	61.8	57.861	323.31	0.0636804	-0.382814	0.528371	0.60084
Q9NUP7;Q9NUP7-2;Q5VVL2;Q5VVK9	Q9NUP7	tRNA:m(4)X modification enzyme TRM13 homolog	TRMT13			0.202497	0.474737	9	9	9	21	54.246	50.262	-0.105812	-0.0459824	0.658828	0.302956
Q5W0H4;A0A0B4J2C3;P13693;J3KPG2;P13693-2;E9PJF7;H0YCX0;Q56UQ5;Q9HAU6	Q5W0H4;A0A0B4J2C3;P13693;J3KPG2;P13693-2;E9PJF7	Translationally-controlled tumor protein	TPT1			0.202372	0.843413	13	13	13	55.9	21.525	101.08	-0.016211	0.102457	0.456806	0.266437
P05556;P05556-2;P05556-5;P05556-4;P05556-3;E7EQW5;C9JPK5;Q5T3E6;E9PLR6;E7EUI6;H7C4N8;E7ERX5;C9JJP8;Q5T3E5;E9PQJ2;C9JNE0	P05556;P05556-2;P05556-5;P05556-4;P05556-3	Integrin beta-1	ITGB1			0.202177	0.506784	27	27	27	36.8	88.414	169.04	0.0788531	-0.206995	0.405339	0.531511
Q9NZL9;Q9NZL9-3;H7C0X7;E5RJR3;Q9NZL9-5	Q9NZL9;Q9NZL9-3;H7C0X7	Methionine adenosyltransferase 2 subunit beta	MAT2B			0.202124	0.958807	19	19	2	69.5	37.551	323.31	-0.00877375	0.114234	0.349365	0.353671
O14974;O14974-2;O14974-5;O14974-4;O14974-3;F8VZN8;H0YHI8;H0YIS4;H0YHL8;F8VW28;H0YIM2;H0YIS3	O14974;O14974-2;O14974-5;O14974-4;O14974-3;F8VZN8	Protein phosphatase 1 regulatory subunit 12A	PPP1R12A			0.202069	0.843605	41	41	41	43.3	115.28	196.81	-0.0289935	0.16723	0.469573	0.200465
Q8N4C8-4;Q8N4C8;Q8N4C8-5;Q8N4C8-2;Q8N4C8-3;I3L2I2	Q8N4C8-4;Q8N4C8;Q8N4C8-5;Q8N4C8-2;Q8N4C8-3	Misshapen-like kinase 1	MINK1			0.20181	0.419211	21	7	7	15.8	147.65	13.054	-0.109962	0.198368	0.517024	NaN
Q8N138-4;Q8N138;J3KTF9;J3QRM9	Q8N138-4;Q8N138;J3KTF9;J3QRM9	ORM1-like protein 3	ORMDL3			0.201626	0.459422	3	2	1	24.1	15.689	9.3433	0.0653552	-0.246755	0.449641	0.538262
O43149;O43149-3;I3L141;O43149-2;I3L3Q3;I3L1Q8	O43149	Zinc finger ZZ-type and EF-hand domain-containing protein 1	ZZEF1			0.201119	0.978122	44	44	44	18.4	331.07	162.45	0.0454314	0.0538064	0.358059	0.347179
O75648;O75648-2;O75648-4;O75648-3;O75648-5;Q2PPL5	O75648;O75648-2;O75648-4	Mitochondrial tRNA-specific 2-thiouridylase 1	TRMU			0.200993	0.755519	11	11	11	33.7	47.744	46.685	0.00387163	0.107822	0.164786	0.527492
I3L0U5;Q6PK04	I3L0U5;Q6PK04	Coiled-coil domain-containing protein 137	CCDC137			0.200796	0.368866	4	4	4	18.8	33.524	28.556	0.0292051	-0.278584	0.295135	0.757428
Q13761;Q13761-2;I3L354;A0A0D9SEN7;I3L0L0;Q13950-3;Q13950-2;Q13950	Q13761;Q13761-2	Runt-related transcription factor 3	RUNX3			0.200412	0.881504	5	5	5	20.2	44.355	10.949	0.122114	0.273218	-0.0226981	0.429013
Q9GZT6-2;Q9GZT6;Q9GZT6-3;H0YF06;J3KN19;E9PKQ5;E9PPJ7	Q9GZT6-2;Q9GZT6;Q9GZT6-3;H0YF06	Coiled-coil domain-containing protein 90B, mitochondrial	CCDC90B			0.200085	0.637005	11	11	11	53.5	27.979	39.845	-0.0288521	-0.0319019	0.406428	0.454664
Q13823;H0YG10	Q13823	Nucleolar GTP-binding protein 2	GNL2			0.199864	0.437156	26	26	26	38.6	83.654	163.84	0.0554714	-0.246635	0.37529	0.615331
Q8TCD5;J3KRC4;J3KSY6;J3KSX6;Q8TCD5-2;J3QQX8	Q8TCD5;J3KRC4;J3KSY6;J3KSX6	5(3)-deoxyribonucleotidase, cytosolic type	NT5C			0.199788	0.782908	15	15	15	79.1	23.382	97.526	-0.0093472	0.0316775	0.393087	0.383736
K7EP18;Q96JZ2-2;Q96JZ2	K7EP18;Q96JZ2-2;Q96JZ2	Hematopoietic SH2 domain-containing protein	HSH2D			0.199759	0.69361	4	4	4	31.2	19.157	8.5742	0.363011	0.237564	NaN	-0.00129785
P62699	P62699	Protein yippee-like 5	YPEL5			0.199444	0.538945	5	5	5	37.2	13.841	13.541	-0.14939	0.0253123	0.476019	0.445833
A0A0G2JH68;O60610;O60610-2;O60610-3;H9KV28;B4E2I7;E5RJ79;H7C2W8	A0A0G2JH68;O60610;O60610-2;O60610-3;H9KV28	Protein diaphanous homolog 1	DIAPH1			0.198224	0.821408	62	62	62	55	141.36	323.31	-0.0180643	0.0681893	0.418568	0.324202
P62753;A2A3R5;A2A3R7	P62753;A2A3R5	40S ribosomal protein S6	RPS6			0.198137	0.84994	16	16	16	47	28.68	108.41	0.0543773	0.000144286	0.393636	0.344392
Q14691	Q14691	DNA replication complex GINS protein PSF1	GINS1			0.197994	0.860118	13	13	13	69.9	22.988	70.247	0.200266	-0.0645402	0.245496	0.410754
W5RWE6;Q7Z7A4;Q7Z7A4-2;Q7Z7A4-6;Q7Z7A4-4;E9PD56;H7BYG4;A0A0C4DG95;Q7Z7A4-7;Q7Z7A4-5;H7C4V0;Q7Z7A4-3;F8WDF7;U3KQS4;C9IYJ2;H7C529;F8WAW8;H7C4W2	W5RWE6;Q7Z7A4;Q7Z7A4-2;Q7Z7A4-6;Q7Z7A4-4;E9PD56;H7BYG4;A0A0C4DG95;Q7Z7A4-7;Q7Z7A4-5;H7C4V0;Q7Z7A4-3	PX domain-containing protein kinase-like protein	PXK		+	0.197879	1.89021	16	16	16	35	63.094	64.308	0.0954658	0.221815	0.271545	0.202688
Q9NR56-6;Q9NR56-2;Q9NR56-5;H7C4T5;Q9NR56-3;Q9NR56-4	Q9NR56-6;Q9NR56-2;Q9NR56-5;H7C4T5;Q9NR56-3;Q9NR56-4	Muscleblind-like protein 1	MBNL1			0.197856	0.297185	11	1	1	38.9	37.073	33.408	0.407344	-0.490537	0.130008	0.744608
O00410;O00410-3;H0Y8C6;E7ETV3;E7EQT5;C9JMV5;H0Y3V4;E7EV12;C9JZD8;E7EWK4;E7EX05;C9JQT6;E7ESA1;E7ESZ1;E7ETV8;C9J875;C9JXE0	O00410;O00410-3;H0Y8C6	Importin-5	IPO5			0.197799	0.685894	62	62	6	77	123.63	323.31	-0.0465609	0.024036	0.45249	0.361231
F8WCF6;P59998;P59998-3;H7C0A3;F8WDD7;A0A0A6YYG9;P59998-2;R4GN08;P59998-4;F8WE39;F8WDW3	F8WCF6;P59998;P59998-3;H7C0A3;F8WDD7;A0A0A6YYG9;P59998-2;R4GN08;P59998-4	Actin-related protein 2/3 complex subunit 4	ARPC4-TTLL3;ARPC4			0.197565	0.740996	15	15	15	69.6	21.058	191.04	0.0142664	-0.00400182	0.452068	0.327928
H0YDQ1;H0YDD3;Q9BVK2-2;Q9BVK2	H0YDQ1;H0YDD3;Q9BVK2-2;Q9BVK2	Probable dolichyl pyrophosphate Glc1Man9GlcNAc2 alpha-1,3-glucosyltransferase	ALG8			0.197217	0.626457	2	2	2	19.5	9.6744	3.0675	0.331717	-0.0625954	0.0142124	0.505533
P78318	P78318	Immunoglobulin-binding protein 1	IGBP1			0.196818	0.796271	22	22	22	73.5	39.221	323.31	0.0709362	-0.0344263	0.400866	0.349897
Q96JJ7;Q96JJ7-2;B4DIE3;H3BPB3;H3BT89;H3BVI1;H3BRY0	Q96JJ7;Q96JJ7-2	Protein disulfide-isomerase TMX3	TMX3			0.196816	0.499421	18	18	18	43.6	51.871	110.69	0.0579773	-0.186443	0.355467	0.56026
Q15813;Q15813-2	Q15813;Q15813-2	Tubulin-specific chaperone E	TBCE			0.196787	0.554976	36	36	35	78.2	59.345	323.31	-0.091666	-0.02869	0.434455	0.47305
O43920	O43920	NADH dehydrogenase [ubiquinone] iron-sulfur protein 5	NDUFS5			0.196645	0.685957	8	8	8	64.2	12.517	30.731	0.0462506	-0.0630926	0.35095	0.452471
A0A0G2JHC2;Q6NYC8;Q6NYC8-2;Q6NYC8-3;Q6NYC8-4;A0A0G2JKF1	A0A0G2JHC2;Q6NYC8;Q6NYC8-2;Q6NYC8-3	Phostensin	PPP1R18		+	0.196458	1.73714	22	22	22	41.6	68.041	116.04	0.311829	0.200504	0.119555	0.153944
Q8TDM0-3;A0A0C4DH49;A0A0C4DGS6;Q8TDM0-2;Q8TDM0;H7C4Y8	Q8TDM0-3;A0A0C4DH49;A0A0C4DGS6;Q8TDM0-2;Q8TDM0;H7C4Y8	Breast carcinoma-amplified sequence 4	BCAS4			0.196418	0.724395	6	6	6	38.9	22.495	16.074	-0.0388575	0.108759	0.509442	0.206329
E9PLK3;P55786;P55786-2;A6NEC2;H0YDG0;E9PP11;A6NEC2-2;H0YCQ5;E9PJY4;E9PJ74;E9PPD4;E9PRQ5;A6NEC2-3;E9PJF9;E9PPZ2;E9PI82	E9PLK3;P55786;P55786-2	Puromycin-sensitive aminopeptidase	NPEPPS			0.196274	0.582775	50	50	50	59.5	102.99	323.31	-0.0777899	-0.0199162	0.458697	0.424107
F5H4Q5;A5D8V6	F5H4Q5;A5D8V6	Vacuolar protein sorting-associated protein 37C	VPS37C			0.196272	0.178657	2	2	2	16.2	17.143	5.5904	NaN	0.509442	0.653427	-0.574053
E7EUI8;E7EM57	E7EUI8;E7EM57	Glucose-6-phosphate 1-dehydrogenase	G6PD			0.196131	1.09207	31	1	1	91.2	38.521	3.3055	0.100685	0.182438	NaN	0.305271
Q9UIW2	Q9UIW2	Plexin-A1	PLXNA1			0.195729	0.183581	12	12	7	7.9	211.06	24.124	-0.457121	-0.171352	0.0719	1.33949
Q96K37;H7C1I0;Q96K37-2;A0A0C4DGZ3;C9JK45	Q96K37;H7C1I0;Q96K37-2	Solute carrier family 35 member E1	SLC35E1			0.195537	0.696381	8	8	8	24.1	44.772	126.35	0.202024	-0.124	0.249263	0.454862
P11172;P11172-3;P11172-2;E9PFD2;P11172-4;F2Z3P2;F2Z303;F8WDG4	P11172;P11172-3;P11172-2;E9PFD2;P11172-4	Uridine 5-monophosphate synthase;Orotate phosphoribosyltransferase;Orotidine 5-phosphate decarboxylase	UMPS			0.195447	0.755121	29	29	29	67.9	52.221	323.31	-0.0124972	0.0251707	0.425674	0.34344
J3KNL6;F1T0I1;O15027;O15027-5;O15027-4;O15027-2;O15027-3;X6RGP5;A0A0C4DH09;Q8N9G1	J3KNL6;F1T0I1;O15027;O15027-5;O15027-4;O15027-2;O15027-3;X6RGP5	Protein transport protein Sec16A	SEC16A			0.195132	0.651164	59	59	59	38.1	251.89	323.31	0.0608938	-0.0754136	0.293135	0.501912
Q8IYB5-3;Q8IYB5-2;Q8IYB5;A0A087X1X9;H0Y5G0	Q8IYB5-3;Q8IYB5-2;Q8IYB5;A0A087X1X9	Stromal membrane-associated protein 1	SMAP1			0.195125	0.680849	8	7	7	15.4	47.861	28.585	0.0764173	0.0939657	0.560617	0.0495016
Q9UGP8;A6PVC9	Q9UGP8	Translocation protein SEC63 homolog	SEC63			0.195066	0.788183	36	36	36	48.9	87.996	274.86	0.103333	-0.0319019	0.244887	0.463947
Q99704;Q99704-3;H7C093;Q99704-2	Q99704;Q99704-3	Docking protein 1	DOK1			0.195026	0.329471	6	6	6	18.7	52.391	19.12	0.109592	-0.424533	0.661111	0.433935
Q7KZ85;Q7KZ85-3	Q7KZ85	Transcription elongation factor SPT6	SUPT6H			0.194936	0.748223	81	81	61	56	199.07	323.31	0.0631529	-0.0508013	0.385707	0.381686
P61106;X6RFL8	P61106;X6RFL8	Ras-related protein Rab-14	RAB14			0.194606	1.22476	20	20	20	86.5	23.897	294.93	0.106141	0.0651587	0.26123	0.345894
A0A087WVF7;Q9NZM3-2;Q9NZM3;Q9NZM3-4;Q9NZM3-3;E7EPJ2;H7BZD4;F8W719;H7C0L8;H0Y3G5	A0A087WVF7;Q9NZM3-2;Q9NZM3;Q9NZM3-4;Q9NZM3-3	Intersectin-2	ITSN2		+	0.194599	1.9033	48	48	47	36.9	191.6	234.55	0.182426	0.104068	0.277628	0.214274
P23743;G3V4E1;P23743-3;F8W1H7;G3V327;C9JM35;F8W1M3;P23743-2;F8VNZ9;G3V4I3;H0YJE7;F8VWX8;G3V312;H0YJH4	P23743;G3V4E1	Diacylglycerol kinase alpha;Diacylglycerol kinase	DGKA		+	0.19447	1.51319	22	22	22	40.3	82.629	205.69	0.20405	0.111833	0.128953	0.333043
P11049-2;P11049;M0QZP6;B7ZAN3;P11049-3	P11049-2;P11049;M0QZP6;B7ZAN3;P11049-3	Leukocyte antigen CD37;Tetraspanin	CD37			0.194459	1.13726	6	6	6	30	23.996	63.105	0.245369	0.0558898	0.104203	0.372374
Q14C86-6;Q14C86-5;Q14C86-2;Q14C86;Q14C86-4;Q14C86-3;F8W9S7;C9IZ08;B4DGD8;B0QZ65;H0Y7I9;H0Y4E7;A0A0A0MQV8;C9IZX9	Q14C86-6;Q14C86-5;Q14C86-2;Q14C86;Q14C86-4;Q14C86-3;F8W9S7;C9IZ08;B4DGD8	GTPase-activating protein and VPS9 domain-containing protein 1	GAPVD1			0.193937	0.813793	46	46	46	36.2	166.17	248.84	0.0237242	0.0253123	0.292193	0.43452
P04080	P04080	Cystatin-B	CSTB		+	0.193858	2.15676	8	8	8	79.6	11.139	156.29	0.136823	0.155749	0.263876	0.218984
A0A087WU53;Q9H0U3;Q9H0U3-2	A0A087WU53;Q9H0U3;Q9H0U3-2	Magnesium transporter protein 1	MAGT1			0.193693	1.11978	7	7	7	18.8	41.531	43.498	0.0763868	0.097476	0.393965	0.206945
Q96HQ2;Q96HQ2-2	Q96HQ2;Q96HQ2-2	CDKN2AIP N-terminal-like protein	CDKN2AIPNL			0.193291	0.534045	4	4	4	38.8	13.196	33.734	-0.15043	0.171975	0.589092	0.162525
H0Y5F4;Q8WV93	H0Y5F4;Q8WV93	Lactation elevated protein 1	LACE1			0.193046	0.505965	4	4	4	11.7	40.261	6.2346	0.0769193	0.00719549	0.0197731	0.668295
Q9Y6A9;C9JBL1;X6R2S6	Q9Y6A9;C9JBL1;X6R2S6	Signal peptidase complex subunit 1	SPCS1			0.192553	0.4829	3	3	3	31.4	11.805	105.21	0.191343	-0.172311	0.121811	0.629367
Q9HA77;H0YFF0;A0A087WWV1;H0YFV1;F5H623;F5H579	Q9HA77	Probable cysteine--tRNA ligase, mitochondrial	CARS2			0.192313	1.21296	16	16	16	28	62.223	39.227	0.192217	0.0850168	0.1145	0.377519
Q5JS37;Q5JS37-2;C9J973;A0A087X2B8	Q5JS37;Q5JS37-2;C9J973	NHL repeat-containing protein 3	NHLRC3			0.191993	1.06642	4	4	4	15.9	38.282	11.161	0.277849	0.0378742	0.0920721	0.360175
Q15645;H0YAL2;Q15645-2	Q15645	Pachytene checkpoint protein 2 homolog	TRIP13			0.191599	1.00571	28	28	28	61.1	48.55	194.36	0.0609088	0.0479571	0.368936	0.288593
P09543-2;P09543;C9K0L8;K7ERZ0;K7ERC4;K7EN66	P09543-2;P09543	2,3-cyclic-nucleotide 3-phosphodiesterase	CNP			0.191	0.293661	25	25	25	65.3	45.098	306.44	-0.201132	-0.29419	0.568032	0.69129
P61009	P61009	Signal peptidase complex subunit 3	SPCS3			0.19099	0.514515	7	7	7	31.7	20.313	24.573	0.0457292	-0.0957433	0.192573	0.6214
A0A087WYN9;Q7Z478;H0Y8L1	A0A087WYN9;Q7Z478	ATP-dependent RNA helicase DHX29	DHX29		+	0.190438	1.45559	52	52	52	45.5	155.29	260.43	0.0952808	0.105946	0.280838	0.279687
Q9HC07;V9GY93;Q9HC07-2;D6RBL0;D6RD79	Q9HC07;V9GY93;Q9HC07-2	Transmembrane protein 165	TMEM165			0.189565	0.419972	6	6	6	20.4	34.905	136.51	0.411809	-0.270626	0.063779	0.553299
Q15758;M0QXM4;Q15758-3;Q15758-2;M0QX44;M0R144	Q15758;M0QXM4;Q15758-3;Q15758-2	Neutral amino acid transporter B(0);Amino acid transporter	SLC1A5			0.189241	0.661386	8	8	8	21.6	56.598	112.54	0.0417736	-0.0701181	0.33674	0.448568
P41182;P41182-2;A0A0C4DH53;C9JL16;C9JCS5;H0YGW0;Q8N143	P41182;P41182-2	B-cell lymphoma 6 protein	BCL6			0.189125	0.414988	16	16	16	30	78.846	50.788	-0.0629506	-0.193569	0.458172	0.554845
Q9BTE6;C9J5N1;Q9BTE6-2;Q9BTE6-3;K7EQ85;L7N2F4;K7N799;H7C054;H7C1K1;L7N2F5	Q9BTE6;C9J5N1;Q9BTE6-2;Q9BTE6-3	Alanyl-tRNA editing protein Aarsd1	AARSD1;PTGES3L-AARSD1			0.188982	0.324782	22	22	22	73.8	45.479	230.78	-0.12499	-0.287977	0.552967	0.615928
O43678;O43678-2	O43678;O43678-2	NADH dehydrogenase [ubiquinone] 1 alpha subcomplex subunit 2	NDUFA2			0.188799	0.661598	9	9	9	69.7	10.921	84.925	0.135887	-0.118429	0.282143	0.455594
Q9NQW7-3;Q9NQW7;Q9NQW7-4;Q9NQW7-2;Q5T6H7;Q5T6H2;Q5T6H3	Q9NQW7-3;Q9NQW7;Q9NQW7-4;Q9NQW7-2;Q5T6H7	Xaa-Pro aminopeptidase 1	XPNPEP1			0.188703	0.981591	39	39	38	74.5	74.797	323.31	0.0534339	0.0422241	0.308943	0.35021
Q9BYJ9;Q9BYJ9-2	Q9BYJ9	YTH domain-containing family protein 1	YTHDF1			0.188445	0.589487	17	9	9	34	60.873	25.535	0.0275132	-0.10002	0.346531	0.479754
Q9UL54-2	Q9UL54-2	Serine/threonine-protein kinase TAO2	TAOK2			0.188325	0.701549	17	15	3	18	119.28	156.24	-0.0377336	0.0308304	0.443713	0.316492
A0A087WXF0;P51608;P51608-2;A0A087X1U4;A0A087WVW7;A0A0D9SFX7;B5MCB4	A0A087WXF0;P51608;P51608-2;A0A087X1U4	Methyl-CpG-binding protein 2	MECP2			0.188271	0.493614	10	10	10	22.6	54.83	20.787	0.260688	-0.212935	0.15017	0.555163
A0A0C4DFL7;Q16850;Q16850-2;H7C0D0;C9IYR8	A0A0C4DFL7;Q16850;Q16850-2	Lanosterol 14-alpha demethylase	CYP51A1			0.188209	1.09957	23	23	23	56.4	57.278	148.9	0.109608	0.0272955	0.280362	0.335572
Q8TC12;Q8TC12-2;G3V2G6;Q8TC12-3;G3V234;H0YJ46;H0YIZ8;Q96NR8	Q8TC12;Q8TC12-2;G3V2G6;Q8TC12-3;G3V234;H0YJ46	Retinol dehydrogenase 11	RDH11			0.188163	0.654313	14	14	9	47.5	35.386	125.6	0.00772452	-0.0527004	0.386701	0.410927
Q9H7H0-2;Q9H7H0;Q9H7H0-3;H0YJW1;G3V353;G3V4P2;G3V3X6;G3V4H5	Q9H7H0-2;Q9H7H0;Q9H7H0-3	Methyltransferase-like protein 17, mitochondrial	METTL17			0.188049	0.644157	8	8	7	19.5	49.6	35.609	0.310236	-0.158365	0.189034	0.411291
Q9Y277;Q9Y277-2;E5RJN6;E5RHZ6;E5RFP6;E5RHE1;E5RK27;E5RFL1	Q9Y277;Q9Y277-2;E5RJN6;E5RHZ6;E5RFP6	Voltage-dependent anion-selective channel protein 3	VDAC3			0.187979	0.663182	12	12	12	56.2	30.658	323.31	0.0607734	-0.0819039	0.327802	0.445244
P68104;Q5VTE0;A0A087WVQ9;P68104-2;A0A087WV01;Q5JR01;A6PW80	P68104;Q5VTE0;A0A087WVQ9;P68104-2;A0A087WV01	Elongation factor 1-alpha 1;Putative elongation factor 1-alpha-like 3;Elongation factor 1-alpha	EEF1A1;EEF1A1P5			0.187777	0.822582	35	35	22	76.8	50.14	323.31	0.0721794	-0.0201356	0.296076	0.402989
Q96GA3;A0A075B6Q4	Q96GA3	Protein LTV1 homolog	LTV1			0.187757	0.416353	11	11	11	29.7	54.854	130.86	-0.0881416	-0.148097	0.619554	0.367713
O15264;O15264-2;Q5R3E6	O15264	Mitogen-activated protein kinase 13	MAPK13			0.187405	0.877907	12	12	12	37.8	42.089	40.341	-0.0736831	0.224658	0.351515	0.247132
K7EMR7;O75298;Q7RTN0;O75298-3;O75298-2	K7EMR7;O75298;Q7RTN0;O75298-3;O75298-2	Reticulon;Reticulon-2	RTN2			0.18738	0.516927	5	5	5	19.2	29.519	22.673	-0.0170666	-0.112444	0.348459	0.530572
O60449;O60449-2;O60449-3	O60449;O60449-2;O60449-3	Lymphocyte antigen 75	LY75			0.187239	0.775487	25	25	25	17.7	198.31	108.75	-0.0197731	0.0429245	0.400101	0.325702
Q9UL26;J3QR51;Q13636	Q9UL26	Ras-related protein Rab-22A	RAB22A			0.187102	0.491621	10	10	10	66	21.855	45.315	0.13622	-0.196376	0.23585	0.572716
Q96FC9-3;Q96FC9-2;Q96FC9-4;Q96FC9;H0YFY8	Q96FC9-3;Q96FC9-2;Q96FC9-4;Q96FC9	Probable ATP-dependent RNA helicase DDX11	DDX11			0.186921	1.06486	11	11	2	14.9	98.686	30.045	0.0365999	0.335026	0.291604	0.0844561
Q92667;Q92667-2;I3L0W0;I3L2A2;I3L2N7;I3NI36;I3L0K6;I3L3K1;I3L364	Q92667;Q92667-2	A-kinase anchor protein 1, mitochondrial	AKAP1			0.18691	0.24698	24	24	24	30	97.34	283.46	-0.141956	-0.458525	0.584289	0.763832
P09132;A0A087WYR0;A0A087WWU9;P09132-2	P09132;A0A087WYR0;A0A087WWU9	Signal recognition particle 19 kDa protein	SRP19			0.18669	0.571119	4	4	4	47.2	16.156	89.69	0.0473087	-0.133606	0.40719	0.425869
E9PRQ7;Q04323;A0A087WTZ5;E9PJ81;Q04323-2;E9PS08	E9PRQ7;Q04323;A0A087WTZ5;E9PJ81;Q04323-2	UBX domain-containing protein 1	UBXN1			0.18662	1.19187	16	16	16	54.9	32.913	198.09	0.0728923	0.0867838	0.24245	0.344355
P28907;H0Y950;P28907-2	P28907;H0Y950	ADP-ribosyl cyclase/cyclic ADP-ribose hydrolase 1	CD38		+	0.186542	1.45648	17	17	17	47.7	34.328	157.15	0.159928	0.0545011	0.254836	0.276905
Q01415;B7ZAX5;Q01415-2;H0YLL8;H0YLL3;H0YK10;H0YN31;H0YK30;H0YNR7;H0YND3;H0YN87;H0YML1	Q01415;B7ZAX5;Q01415-2	N-acetylgalactosamine kinase	GALK2		+	0.186493	2.76895	19	19	19	54.4	50.378	162.24	0.17718	0.228973	0.146004	0.193816
Q96DV4;Q96DV4-2	Q96DV4	39S ribosomal protein L38, mitochondrial	MRPL38			0.186479	0.603835	23	23	23	49.2	44.596	110.05	0.130018	-0.133511	0.255078	0.494333
Q8IUI4	Q8IUI4	Putative protein SNX29P2	SNX29P2			0.186216	0.292622	4	4	4	29.7	27.225	23.61	0.82805	0.331705	-0.255133	-0.159758
P48426;P48426-2;H7BXS3;S4R320	P48426;P48426-2	Phosphatidylinositol 5-phosphate 4-kinase type-2 alpha	PIP4K2A			0.186032	0.343461	12	12	7	29.1	46.224	156.4	-0.219587	-0.151859	0.496104	0.61947
P30419;P30419-2;Q5VUC6;O60551;B7Z8J4;K7EN82;K7EN42	P30419;P30419-2	Glycylpeptide N-tetradecanoyltransferase 1	NMT1			0.185953	0.412535	24	24	24	51.2	56.806	177.41	-0.0833836	-0.173612	0.441377	0.559431
Q8TD55-2;Q8TD55;C9J4A7	Q8TD55-2;Q8TD55;C9J4A7	Pleckstrin homology domain-containing family O member 2	PLEKHO2			0.185802	0.286083	4	4	4	13.2	47.785	2.9109	0.143771	-0.204682	NaN	0.618318
P20591;F8W8T1;H9KVC7;H9KVC9;P20592-2;C9JEL4;H9KVD0;H9KVC4;C9JS04;C9JZQ9	P20591;F8W8T1	Interferon-induced GTP-binding protein Mx1;Interferon-induced GTP-binding protein Mx1, N-terminally processed	MX1			0.185402	0.065775	10	10	3	19.2	75.519	48.86	-0.477677	-0.976078	NaN	2.00996
Q14974;Q14974-2;J3KTM9;J3QR48;J3QKQ5;J3QRG4;J3KS06	Q14974;Q14974-2;J3KTM9	Importin subunit beta-1	KPNB1			0.185273	0.522401	59	59	59	69.4	97.169	323.31	-0.0589399	-0.0841656	0.441271	0.442928
H3BMQ0;P49815-7;P49815-5;P49815-3;P49815-2;P49815-4;P49815;P49815-6;H3BQK4;P49815-8;H3BQY7;I3L3B1;Q5HYF7;H3BNT5	H3BMQ0;P49815-7;P49815-5;P49815-3;P49815-2;P49815-4;P49815;P49815-6	Tuberin	TSC2		+	0.185165	1.37851	23	23	23	19.4	194.39	54.102	0.129971	0.0601858	0.263635	0.286867
Q9BTZ2;Q9BTZ2-8;Q9BTZ2-4;Q9BTZ2-5;F5GWZ1;Q9BTZ2-3;Q9BTZ2-7;Q9BTZ2-2;H0YN69;D3YTE6;Q6PKH6;Q6PKH6-2;P0CG22;H0YLE1;H0YKN3;F6TD35;E9PFL3;A0A087WXI8;H0YNP7	Q9BTZ2;Q9BTZ2-8;Q9BTZ2-4;Q9BTZ2-5;F5GWZ1;Q9BTZ2-3;Q9BTZ2-7;Q9BTZ2-2	Dehydrogenase/reductase SDR family member 4	DHRS4			0.185141	0.239108	10	10	8	36.3	29.537	79.468	0.809777	0.568129	-0.391115	-0.246226
Q8IUX1-3;Q8IUX1-5;Q8IUX1-4;Q8IUX1-2;Q8IUX1	Q8IUX1-3;Q8IUX1-5;Q8IUX1-4;Q8IUX1-2;Q8IUX1	Complex I assembly factor TMEM126B, mitochondrial	TMEM126B			0.185011	0.611789	5	5	5	49.1	12.516	31.805	0.21093	0.409038	0.299714	-0.179638
Q9H2F5-3;Q9H2F5-2;Q9H2F5	Q9H2F5-3;Q9H2F5-2;Q9H2F5	Enhancer of polycomb homolog 1	EPC1			0.184859	0.960945	5	5	5	6.8	85.221	5.0973	0.388204	0.245739	0.0344974	0.0709968
P42766;F2Z388	P42766	60S ribosomal protein L35	RPL35			0.184345	0.873044	9	9	9	46.3	14.551	21.457	-0.0528332	0.197614	0.386921	0.20568
A6NKF9;B7ZAQ6-2;B7ZAQ6-3;P0CG08;B7ZAQ6;A0A087WW78;A0A087WW82;U3KPV2;E9PKY3	A6NKF9;B7ZAQ6-2;B7ZAQ6-3;P0CG08;B7ZAQ6;A0A087WW78;A0A087WW82;U3KPV2;E9PKY3	Putative Golgi pH regulator C;Golgi pH regulator A;Golgi pH regulator B	GPR89C;GPR89A;GPR89B			0.184308	0.858115	6	6	6	20	36.67	45.367	0.161088	-0.00161668	0.139862	0.437897
P61289;P61289-2;K9J957;P61289-3;A0A087WTV2;K7ESG5;K7ENH2;B3KQ25;B7Z8D3;K7EPX6;K7EKR3;K7EMD0	P61289;P61289-2;K9J957;P61289-3;A0A087WTV2;K7ESG5;K7ENH2;B3KQ25	Proteasome activator complex subunit 3	PSME3			0.183512	0.444364	22	22	22	74.4	29.506	305.13	-0.128557	-0.0816595	0.551295	0.39297
Q96QE3;A0A075B754;Q96QE3-2	Q96QE3;A0A075B754;Q96QE3-2	ATPase family AAA domain-containing protein 5	ATAD5			0.183474	0.243206	13	13	13	9.5	207.57	26.613	-0.0832474	-0.506107	0.689299	0.633949
H7C284;Q6ZSS7	H7C284;Q6ZSS7	Major facilitator superfamily domain-containing protein 6	MFSD6			0.183458	0.223288	2	2	2	38.5	9.7504	13.262	0.408493	-0.402302	NaN	0.544182
Q86VD7	Q86VD7	Mitochondrial coenzyme A transporter SLC25A42	SLC25A42			0.183297	0.283197	2	2	2	10.1	35.409	16.595	0.549768	0.399335	-0.564414	0.348501
Q9NVX2;A0A0A0MRH0;K7EN33;Q9NVX2-2;K7ERN7	Q9NVX2;A0A0A0MRH0;K7EN33	Notchless protein homolog 1	NLE1			0.183143	0.360494	15	15	15	41	53.32	120.97	-0.141171	-0.198692	0.521654	0.550782
O43303-2;O43303	O43303-2;O43303	Centriolar coiled-coil protein of 110 kDa	CCP110			0.183085	0.31362	7	7	7	8.4	111.22	22.596	0.15814	0.235482	-0.394525	0.733244
Q14669-2;Q14669;Q14669-3;Q14669-4;H7C2Y1;G5E9G6;C9JLJ5;C9JSX9;C9JLD7;H7C1L9	Q14669-2;Q14669;Q14669-3;Q14669-4	E3 ubiquitin-protein ligase TRIP12	TRIP12			0.183041	0.640992	32	32	32	20.7	223.9	98.434	0.156193	-0.142513	0.296428	0.422056
Q8IWT0;D3DPQ2;A0A087X0V4;A8K0B5;Q8IWT0-2;A0A087WW18;H7C3R6	Q8IWT0;D3DPQ2;A0A087X0V4;A8K0B5;Q8IWT0-2	Protein archease	ZBTB8OS			0.182839	1.13775	4	4	4	27.5	19.491	25.72	-0.0149266	0.212134	0.277985	0.256166
O14921	O14921	Regulator of G-protein signaling 13	RGS13			0.182793	0.955393	5	5	5	26.4	19.135	5.0906	-0.0476779	0.333538	0.202763	0.24255
Q8WU10;B4DEW4;Q8WU10-2;B5MDP1	Q8WU10;B4DEW4;Q8WU10-2	Pyridine nucleotide-disulfide oxidoreductase domain-containing protein 1	PYROXD1			0.182496	0.42307	3	3	3	8.6	55.792	11.043	0.215195	NaN	0.445727	-0.113434
A8MT72;Q2NKQ5;Q16799-3;Q16799-2;Q16799	A8MT72;Q2NKQ5;Q16799-3;Q16799-2;Q16799	Reticulon;Reticulon-1	RTN1			0.182377	0.401874	2	2	2	8.3	21.862	1.9662	NaN	-0.145749	0.425781	0.267097
E7EVQ6;Q14534;H0YBN7;E5RJH9	E7EVQ6;Q14534	Squalene monooxygenase	SQLE			0.182334	0.681401	15	15	15	41.1	53.067	77.624	0.501096	0.0454429	-0.00676763	0.189565
Q86SZ2;Q86SZ2-2;G3V2H7;G3V4C3	Q86SZ2;Q86SZ2-2	Trafficking protein particle complex subunit 6B	TRAPPC6B		+	0.181696	2.03637	10	10	10	65.8	17.983	57.318	0.228993	0.0945064	0.214	0.189285
P53611;Q5T4U8	P53611;Q5T4U8	Geranylgeranyl transferase type-2 subunit beta	RABGGTB			0.181658	0.627851	5	5	5	18.4	36.924	22.567	-0.0836559	0.0467006	0.459956	0.303632
Q96QE5;J3KTG7;Q96QE5-4	Q96QE5	Transcription elongation factor, mitochondrial	TEFM			0.181642	0.473696	8	8	8	21.7	41.676	39.612	-0.0441843	-0.130223	0.521955	0.37902
Q8TEB1;Q8TEB1-2;H0YM86;H0YN92;H0YKR8;H0YNS2;Q8TEB1-3;H0YLH4;H0YMN6;H0YL98;H0YL64;H0YN21;H0YM56;H0YMZ4;H0YLQ1;H0YLF1;H0YLX7;H0YN03;H0YNK2;H0YNT0;H0YN15;H0YMF7;H0YL29;H0YLB2	Q8TEB1;Q8TEB1-2;H0YM86;H0YN92	DDB1- and CUL4-associated factor 11	DCAF11			0.181507	0.714779	14	14	11	32.2	61.669	45.127	0.0116316	0.054779	0.168128	0.49149
P53602;H3BP35;H3BQ47;A0A087WV85;H3BRZ1;H3BVC4	P53602;H3BP35	Diphosphomevalonate decarboxylase	MVD		+	0.181456	1.98459	25	25	25	74.8	43.404	165.65	0.175387	0.270828	0.153676	0.125935
Q6IQ49-2;Q6IQ49;Q6IQ49-3	Q6IQ49-2;Q6IQ49;Q6IQ49-3	Protein SDE2 homolog	SDE2		+	0.181299	2.07766	9	9	9	26.4	48.504	25.761	0.131297	0.15549	0.264717	0.173694
Q00653-4;Q00653	Q00653-4;Q00653	Nuclear factor NF-kappa-B p100 subunit;Nuclear factor NF-kappa-B p52 subunit	NFKB2			0.180986	0.642381	35	35	13	45.1	96.677	206.21	0.489281	0.161565	-0.0955429	0.168641
Q96ED9-2;Q96ED9	Q96ED9-2;Q96ED9	Protein Hook homolog 2	HOOK2			0.180869	0.391548	3	3	3	4.9	83.021	4.7559	-0.0846086	-0.194675	0.551393	0.451366
Q16795;F5H0J3;F5GY40;H3BRM9	Q16795	NADH dehydrogenase [ubiquinone] 1 alpha subcomplex subunit 9, mitochondrial	NDUFA9			0.180826	0.818547	27	27	27	66.6	42.509	231.66	0.0472639	-0.00219453	0.284751	0.393482
Q9NW13;Q9NW13-2;C9JAA9;H7C5G8;C9JE21	Q9NW13;Q9NW13-2	RNA-binding protein 28	RBM28			0.180782	0.342761	26	26	26	34.1	85.737	84.779	-0.00662128	-0.299702	0.365916	0.663534
P26641;P26641-2	P26641;P26641-2	Elongation factor 1-gamma	EEF1G			0.180583	0.782169	42	42	42	78.9	50.118	323.31	0.0354757	-0.0145287	0.360982	0.340404
Q15075	Q15075	Early endosome antigen 1	EEA1			0.180455	0.810642	63	63	63	50.5	162.46	323.31	-0.0485152	0.192825	0.417164	0.160347
P35244;B5MC59	P35244;B5MC59	Replication protein A 14 kDa subunit	RPA3			0.180229	0.635756	10	10	10	89.3	13.569	207.13	0.0083775	-0.0618121	0.397036	0.377313
Q7Z591-7;Q7Z591-2;Q7Z591;Q7Z591-8;Q7Z591-3;Q7Z591-5;Q7Z591-6;Q7Z591-4	Q7Z591-7;Q7Z591-2;Q7Z591;Q7Z591-8;Q7Z591-3	AT-hook-containing transcription factor	AKNA			0.180177	0.358397	17	17	17	16.7	141.62	54.891	0.0341012	-0.283913	0.302524	0.667997
Q9H0U6	Q9H0U6	39S ribosomal protein L18, mitochondrial	MRPL18			0.180151	0.695455	7	7	7	40	20.576	61.341	-0.063641	0.0743684	0.268674	0.441203
P07992-4;P07992-2;P07992;K7ES46;K7ER89;K7EP14;P07992-3;K7ER60;K7EMT9;K7EJW9	P07992-4;P07992-2;P07992;K7ES46;K7ER89;K7EP14;P07992-3;K7ER60	DNA excision repair protein ERCC-1	ERCC1			0.180138	0.874657	4	4	4	23.1	25.211	7.8532	0.401844	0.00575919	0.0775164	0.235433
Q6NXT6-2;Q6NXT6;H0Y985	Q6NXT6-2;Q6NXT6	Transmembrane anterior posterior transformation protein 1 homolog	TAPT1			0.180079	0.769232	7	7	7	16.4	63.486	16.687	0.110589	-0.0724524	0.342668	0.339509
O96033;E9PKT9	O96033;E9PKT9	Molybdopterin synthase sulfur carrier subunit	MOCS2			0.180069	0.800665	5	5	5	46.6	9.7552	12.52	-0.0143553	0.0476779	0.307895	0.379057
Q7Z7G8-2;Q7Z7G8-6;Q7Z7G8;Q7Z7G8-4;Q7Z7G8-3;Q7Z7G8-5	Q7Z7G8-2;Q7Z7G8-6;Q7Z7G8	Vacuolar protein sorting-associated protein 13B	VPS13B			0.179841	1.09774	5	5	5	1.7	445.98	6.3554	0.283457	0.155102	NaN	0.100964
P12081-4;P12081;B3KWE1;P12081-3;P12081-2;B4DDD8;B4E1C5;E7ETE2;D6RF05	P12081-4;P12081;B3KWE1;P12081-3;P12081-2;B4DDD8;B4E1C5;E7ETE2	Histidine--tRNA ligase, cytoplasmic	HARS			0.179823	1.07336	35	35	28	61.8	54.846	323.31	0.0229912	0.116098	0.349365	0.230838
Q86WV7;Q96MW1;Q96MW1-2;K7ER24	Q86WV7;Q96MW1;Q96MW1-2	Coiled-coil domain-containing protein 43	CCDC43			0.179751	0.349547	10	10	10	37.9	25.563	43.191	-0.201383	-0.105954	0.686523	0.33982
Q96AG4;I3L223	Q96AG4	Leucine-rich repeat-containing protein 59	LRRC59			0.179707	0.56719	18	18	18	57	34.93	282.39	0.000144286	-0.0862163	0.326192	0.478708
Q9UH62	Q9UH62	Armadillo repeat-containing X-linked protein 3	ARMCX3			0.179523	0.701846	12	12	12	37.5	42.5	42.193	0.191804	-0.0398145	0.0915306	0.474573
Q15650;H0YL91;H0YLN7;H0YK63;H3BMU9;H0YKD9	Q15650;H0YL91	Activating signal cointegrator 1	TRIP4		+	0.179152	1.72463	15	15	15	31.3	66.145	143.99	0.118069	0.108223	0.230941	0.259375
Q13427;E9PG73;Q13427-2;C9JN15;C9JM79;C9JT64;C9J679	Q13427;E9PG73;Q13427-2;C9JN15;C9JM79	Peptidyl-prolyl cis-trans isomerase G;Peptidyl-prolyl cis-trans isomerase	PPIG			0.178988	0.623076	14	14	14	23.6	88.616	76.7	0.00702864	-0.0440177	0.274292	0.478648
P11171-2;P11171;Q4VB86;P11171-3;P11171-5;P11171-4;P11171-7;P11171-6;Q4VXN1	P11171-2;P11171;Q4VB86;P11171-3;P11171-5;P11171-4;P11171-7;P11171-6	Protein 4.1	EPB41		+	0.17895	1.71002	32	31	29	47.3	93.237	235.46	0.190701	0.231801	0.228111	0.0651891
Q9BYC9;I3L2X1;Q9BYC9-2	Q9BYC9	39S ribosomal protein L20, mitochondrial	MRPL20			0.178928	0.672508	5	5	5	32.2	17.442	11.424	0.145446	-0.0928632	0.20389	0.459239
Q9UNE7;Q9UNE7-2;H3BTA3;H3BS86;H3BUD0	Q9UNE7;Q9UNE7-2	E3 ubiquitin-protein ligase CHIP	STUB1			0.178846	0.350915	9	9	9	35.6	34.856	23.549	-0.147567	-0.194245	0.600555	0.456643
A0A0A0MTJ9;Q6PIU2;Q6PIU2-2;H7C046;Q6PIU2-3;F8WE33	A0A0A0MTJ9;Q6PIU2;Q6PIU2-2;H7C046;Q6PIU2-3	Neutral cholesterol ester hydrolase 1	NCEH1			0.178419	0.468071	13	13	13	37.3	49.881	97.035	0.447111	-0.194394	0.0278618	0.433097
P28331;P28331-2;P28331-4;P28331-5;B4DJ81;P28331-3;C9JPQ5;F8WDL5	P28331;P28331-2;P28331-4;P28331-5;B4DJ81;P28331-3	NADH-ubiquinone oxidoreductase 75 kDa subunit, mitochondrial	NDUFS1			0.178386	0.829085	43	43	43	70	79.467	323.31	0.110106	-0.0374732	0.249021	0.391891
O95466-2;O95466;O95466-3;K7EK60;A0A0A0MR62;K7EJE6;K7ERL1;Q96PY5;Q96PY5-3;C9IZY8;F8W1F5;Q8IVF7-2;Q8IVF7-3;Q8IVF7;K7EMY8	O95466-2;O95466;O95466-3;K7EK60;A0A0A0MR62	Formin-like protein 1	FMNL1			0.178334	1.09011	37	37	37	36.7	122.41	244.68	0.011239	0.119423	0.297602	0.285073
M0R2A0;Q5UCC4-2;Q5UCC4	M0R2A0;Q5UCC4-2;Q5UCC4	ER membrane protein complex subunit 10	EMC10			0.17826	0.638701	4	4	4	15.1	38.975	46.634	0.0439136	-0.0785485	0.309758	0.437916
Q9UBB5;X6RBL6;Q9UBB5-3;J3KSA7	Q9UBB5	Methyl-CpG-binding domain protein 2	MBD2		+	0.178166	1.40625	16	16	16	43.8	43.254	96.147	0.221522	0.0529723	0.148218	0.289951
Q6YN16;Q6YN16-2	Q6YN16;Q6YN16-2	Hydroxysteroid dehydrogenase-like protein 2	HSDL2			0.178044	0.429582	29	29	29	77.5	45.394	155.32	-0.0593554	-0.16054	0.395611	0.536461
Q8IYW5	Q8IYW5	E3 ubiquitin-protein ligase RNF168	RNF168			0.177988	0.262315	3	3	3	7	65.019	7.3889	-0.334683	-0.0598709	0.216362	0.890145
Q9BTU6;E9PAM4	Q9BTU6;E9PAM4	Phosphatidylinositol 4-kinase type 2-alpha	PI4K2A			0.177971	0.486355	17	17	17	41.5	54.022	47.818	-0.025454	-0.127841	0.35242	0.512761
Q96FZ7;I3L4A1;I3L3E4;I3L4G8	Q96FZ7;I3L4A1;I3L3E4;I3L4G8	Charged multivesicular body protein 6	CHMP6			0.177736	1.27219	7	7	7	43.3	23.485	55.435	0.0486957	0.145091	0.324696	0.192464
Q86VN1;Q86VN1-2	Q86VN1;Q86VN1-2	Vacuolar protein-sorting-associated protein 36	VPS36			0.17752	1.22025	17	17	17	50	43.816	51.139	0.0822093	0.065848	0.298306	0.263715
Q7Z7F7;Q7Z7F7-2;X6R631;X6RIW1	Q7Z7F7;Q7Z7F7-2;X6R631	39S ribosomal protein L55, mitochondrial	MRPL55			0.176938	1.01965	6	6	6	38.3	15.128	29.317	0.310933	-0.0169936	0.14496	0.268852
X6RHX1;Q8IZE3-2;Q8IZE3	X6RHX1;Q8IZE3-2;Q8IZE3	Protein-associating with the carboxyl-terminal domain of ezrin	SCYL3			0.176877	0.306996	4	4	4	9.5	65.298	9.6373	-0.0309717	-0.255753	0.193456	0.800777
Q9NS18;Q9NS18-2	Q9NS18;Q9NS18-2	Glutaredoxin-2, mitochondrial	GLRX2			0.176671	0.665072	5	5	5	40.2	18.051	28.111	0.0530147	-0.0632132	0.443925	0.27296
Q96EP1-5;Q96EP1-3;Q96EP1-2;Q96EP1-4;Q96EP1;A0A096P6K8	Q96EP1-5;Q96EP1-3;Q96EP1-2;Q96EP1-4;Q96EP1	E3 ubiquitin-protein ligase CHFR	CHFR			0.176664	0.325284	3	3	3	5.1	63.873	4.7153	-0.185867	0.206018	NaN	0.509841
P52789;E9PB90;P52790	P52789;E9PB90	Hexokinase-2;Hexokinase	HK2		+	0.1766	1.67416	44	39	39	53.1	102.38	323.31	0.116504	0.0999011	0.251689	0.238306
Q9H2K8;G3V1Q8;F5GWV8;F5H5C7;H0YF68;F5H3L7;F5H5E0	Q9H2K8;G3V1Q8	Serine/threonine-protein kinase TAO3	TAOK3		+	0.176504	1.58398	27	27	23	28.2	105.4	112.44	0.26446	0.229219	0.135404	0.0769345
P08240;P08240-2	P08240;P08240-2	Signal recognition particle receptor subunit alpha	SRPR			0.176298	1.22886	45	45	45	71.3	69.81	323.31	0.145669	0.0436244	0.185867	0.33003
Q9BYC8	Q9BYC8	39S ribosomal protein L32, mitochondrial	MRPL32			0.17628	0.39431	3	3	3	23.9	21.405	45.533	0.0462804	-0.277569	0.432532	0.503875
Q8N8A2;Q8N8A2-2;Q8N8A2-4;H7C209;Q8N8A2-3;H7C4A0;Q8N8A2-5;H7C3P1;C9JY51;F8WBW3	Q8N8A2;Q8N8A2-2;Q8N8A2-4;H7C209;Q8N8A2-3	Serine/threonine-protein phosphatase 6 regulatory ankyrin repeat subunit B	ANKRD44			0.176244	0.695426	41	41	38	51.5	107.6	323.31	0.075216	-0.0599761	0.251446	0.438288
Q15797;D6RD62;D6RAY1;D6REQ3;D6RDN7;D6RBH9;H0YAK7;H0YNV1;Q15797-2	Q15797	Mothers against decapentaplegic homolog 1	SMAD1			0.176223	0.593066	14	14	5	43.2	52.259	195.73	0.0624899	-0.0748057	0.205518	0.511691
G3V5N8;Q9HBF4-3;Q9HBF4;Q9HBF4-2	G3V5N8;Q9HBF4-3;Q9HBF4	Zinc finger FYVE domain-containing protein 1	ZFYVE1			0.176185	0.636415	9	9	9	14.1	88.422	12.661	-0.0113525	0.164786	0.511063	0.0402447
O75427;H7C5D9;C9JYK0;A0A087X197	O75427	Leucine-rich repeat and calponin homology domain-containing protein 4	LRCH4			0.176168	0.556338	19	19	19	37.5	73.449	80.375	0.335608	-0.105954	0.013498	0.461521
Q96S59;Q96S59-2;Q96S59-3	Q96S59;Q96S59-2;Q96S59-3	Ran-binding protein 9	RANBP9			0.176152	0.67873	13	13	12	24.6	77.846	73.193	-0.0375931	0.0100636	0.392867	0.339272
Q9BQ67;M0QX71	Q9BQ67;M0QX71	Glutamate-rich WD repeat-containing protein 1	GRWD1			0.175818	0.554744	16	16	16	45.3	49.419	219.95	0.0541376	-0.129529	0.305795	0.47287
P42331-4;P42331-6;P42331;P42331-5;P42331-3;H7C4P1;P42331-2;C9JB56;B7Z8K7;F8WDF6;F8WAV9	P42331-4;P42331-6;P42331;P42331-5;P42331-3;H7C4P1;P42331-2	Rho GTPase-activating protein 25	ARHGAP25		+	0.175428	1.36293	21	21	21	38.9	73.505	107.82	0.210346	0.125122	0.0635029	0.302742
Q3MHD2;Q3MHD2-2;K7ELG9	Q3MHD2;Q3MHD2-2;K7ELG9	Protein LSM12 homolog	LSM12			0.175072	0.529044	7	7	7	47.7	21.701	61.642	-0.128162	0.0329472	0.495695	0.299809
Q9BYD1;E5RJI7;H0YAX3;E5RFI2	Q9BYD1;E5RJI7	39S ribosomal protein L13, mitochondrial	MRPL13			0.174914	0.598526	14	14	14	82	20.692	281.87	0.129371	-0.120122	0.210513	0.479895
E9PI08;Q9Y256;E9PPV9;E9PKA7	E9PI08;Q9Y256;E9PPV9;E9PKA7	CAAX prenyl protease 2	RCE1			0.174714	0.384144	2	2	2	7.1	33.429	4.7752	-0.143785	-0.143006	0.528171	0.457475
P06400	P06400	Retinoblastoma-associated protein	RB1			0.17418	0.563823	39	39	39	47.5	106.16	263.95	-0.0543624	-0.0468764	0.377624	0.420337
Q9NVH0-2;Q9NVH0;C9JLF4	Q9NVH0-2;Q9NVH0	Exonuclease 3-5 domain-containing protein 2	EXD2			0.17388	0.378496	5	5	5	11.5	56.345	8.8187	-0.0589399	-0.15266	0.23352	0.673601
Q32Q12;P22392-2;J3KPD9;P22392;O60361;F6XY72	Q32Q12;P22392-2;J3KPD9;P22392	Nucleoside diphosphate kinase;Nucleoside diphosphate kinase B	NME1-NME2;NME2			0.17337	0.490692	19	19	8	75.3	32.642	206.91	-0.0775164	-0.0846091	0.420401	0.435202
Q16851-2;C9JNZ1;C9JVG3;C9JWG0;C9JQU9;C9JUW1;C9JTZ5;F2Z3H1;C9J3M0;F2Z3P4;F8WC70	Q16851-2	UTP--glucose-1-phosphate uridylyltransferase	UGP2			0.173141	0.873434	35	35	3	80.1	55.676	323.31	-0.0247452	0.105008	0.365804	0.246498
Q9H9Y2	Q9H9Y2	Ribosome production factor 1	RPF1			0.172823	0.507569	14	14	14	38.7	40.11	32.604	0.232057	-0.190652	0.151339	0.498545
Q13043;F5H5B4;Q13043-2;A0A087WVN8;A0A087WYT4	Q13043;F5H5B4;Q13043-2	Serine/threonine-protein kinase 4;Serine/threonine-protein kinase 4 37kDa subunit;Serine/threonine-protein kinase 4 18kDa subunit	STK4			0.172564	0.588783	29	29	21	55.2	55.63	122.01	-0.0289935	-0.0529698	0.41186	0.36036
Q9NZ08;Q9NZ08-2;H0Y9X5	Q9NZ08;Q9NZ08-2	Endoplasmic reticulum aminopeptidase 1	ERAP1			0.172545	0.579328	40	40	37	51.6	107.23	323.31	0.0537932	-0.108534	0.28155	0.46337
Q969Q0	Q969Q0	60S ribosomal protein L36a-like	RPL36AL		+	0.171943	1.52748	8	8	2	42.5	12.469	47.954	0.0478603	0.201258	0.254231	0.184425
A0A0G2JLV0;A0A087WYD6;X5CMH5;Q03519;Q03519-2	A0A0G2JLV0;A0A087WYD6;X5CMH5;Q03519;Q03519-2	Antigen peptide transporter 2	TAP2			0.171773	1.04253	19	19	2	35.3	77.64	164.08	0.317427	0.0557509	0.0490731	0.264842
P51648;P51648-2;J3QRD1;I3L1M4;J3QS00;J3QKK9;J3KTD9;I3L2W1;J3KTG1;C9JGJ2;I3L0X1;K7EN73;E9PJV0;C9JKT2;C9JMC5;I3L3I9;A8MYB8;E9PNN6;P48448;P43353-2;P30838;P43353	P51648;P51648-2;J3QRD1	Fatty aldehyde dehydrogenase	ALDH3A2		+	0.17175	1.45123	22	22	22	44.3	54.847	218.85	0.126281	0.0918014	0.163112	0.305806
Q8WZ82	Q8WZ82	Ovarian cancer-associated gene 2 protein	OVCA2			0.17166	0.758716	6	6	6	49.3	24.418	46.764	0.147426	-0.0856957	0.257735	0.367173
P39023;G5E9G0;H7C422;H7C3M2;B5MCW2;F8WCR1	P39023;G5E9G0;H7C422;H7C3M2;B5MCW2	60S ribosomal protein L3	RPL3			0.171629	1.10264	27	27	25	60.8	46.108	323.31	0.0837069	0.0353423	0.280125	0.287343
Q9UKY1	Q9UKY1	Zinc fingers and homeoboxes protein 1	ZHX1			0.171622	0.274882	4	4	4	7.9	98.096	3.7651	0.60154	-0.1778	NaN	0.0911256
Q96I23	Q96I23	Protein preY, mitochondrial	PYURF			0.170877	0.125669	2	2	2	51.8	12.654	7.0843	0.624065	-0.759942	NaN	0.648507
Q9NP72;Q9NP72-2;A0A087X163;H0Y6T8;Q5W0J0;Q9NP72-3	Q9NP72;Q9NP72-2;A0A087X163;H0Y6T8;Q5W0J0	Ras-related protein Rab-18	RAB18			0.170858	0.882298	15	15	15	74.8	22.977	98.626	0.0804845	0.0241777	0.178619	0.400149
Q96E11-8;Q96E11-3;Q96E11;Q96E11-2;X6RDS5;Q96E11-7;Q96E11-5;Q96E11-6;Q96E11-4	Q96E11-8;Q96E11-3;Q96E11	Ribosome-recycling factor, mitochondrial	MRRF			0.170752	1.2313	12	12	12	53.3	23.51	111.46	0.163526	0.0277203	0.307778	0.183982
P27824;P27824-2;P27824-3;H0Y9Q7;D6RGY2;D6RDP7;D6RFL1;D6RB85;H0Y9H1;D6RAU8;D6RAQ8;D6RHJ3;D6RD16	P27824;P27824-2;P27824-3	Calnexin	CANX			0.170675	0.634227	39	39	39	56.8	67.567	323.31	0.28051	-0.0731959	0.0425042	0.432883
J3KPS0;Q9NXW2;Q9NXW2-2;V9GYN7;V9GY70	J3KPS0;Q9NXW2;Q9NXW2-2;V9GYN7	DnaJ homolog subfamily B member 12	DNAJB12			0.170572	0.557008	8	8	8	23.5	45.489	33.723	0.0577071	-0.111212	0.247198	0.488593
Q3MII6;C9JMI8;Q3MII6-2	Q3MII6;C9JMI8	TBC1 domain family member 25	TBC1D25			0.170289	0.485948	5	5	5	9.3	76.326	12.064	0.557242	-0.139935	0.0797024	0.184146
C9JXB8;C9JNW5;P83731	C9JXB8;C9JNW5;P83731	60S ribosomal protein L24	RPL24			0.170141	0.770458	7	7	7	47.9	14.369	19.695	-0.00992037	0.0316775	0.378734	0.280072
Q9UG63;Q9UG63-2;C9JHK9;C9JZV3	Q9UG63;Q9UG63-2;C9JHK9;C9JZV3	ATP-binding cassette sub-family F member 2	ABCF2			0.169991	0.535975	40	40	40	59.4	71.289	323.31	-0.0377336	-0.0817512	0.391108	0.40834
Q9P1W9;C9J8V9	Q9P1W9;C9J8V9	Serine/threonine-protein kinase pim-2	PIM2			0.169367	0.40245	2	2	2	10.9	34.19	7.231	-0.0415233	0.0710762	NaN	0.478547
O00299	O00299	Chloride intracellular channel protein 1	CLIC1			0.169191	1.27241	20	20	20	86.7	26.922	260.86	0.224233	0.0149266	0.173767	0.263837
A0A0A0MQX2;Q9HD23-2;Q9HD23;Q9HD23-4;H7BZ29	A0A0A0MQX2;Q9HD23-2;Q9HD23;Q9HD23-4	Magnesium transporter MRS2 homolog, mitochondrial	MRS2			0.169176	0.295398	3	3	3	7.4	44.277	3.0344	0.439344	-0.487015	0.242206	0.48217
A0A075B6K1	A0A075B6K1		IGLV2-14			0.168911	0.586914	1	1	1	13.3	12.597	5.0842	0.251728	-0.136918	0.119024	0.441811
Q92974-2;Q92974;V9GYM8;Q92974-3;Q5VY93;V9GYF0;V9GZ14;V9GYG5;V9GYF5;V9GZ58	Q92974-2;Q92974;V9GYM8;Q92974-3	Rho guanine nucleotide exchange factor 2	ARHGEF2			0.168781	0.639684	52	52	52	62.8	111.47	323.31	-0.0229005	-0.0266312	0.340391	0.384263
O75380;D6RBT3	O75380;D6RBT3	NADH dehydrogenase [ubiquinone] iron-sulfur protein 6, mitochondrial	NDUFS6			0.16878	0.8155	5	5	5	54	13.711	66.528	0.0371032	-0.00044731	0.2806	0.357862
Q53ET0;Q5T4K5;J3KNE6;Q6UUV7-3;Q6UUV7	Q53ET0	CREB-regulated transcription coactivator 2	CRTC2			0.168699	0.426266	12	12	4	25.7	73.301	53.232	0.182688	-0.211665	0.124196	0.579577
O94822;O94822-3;H7BYG8;S4R3T2;O94822-2	O94822;O94822-3;H7BYG8	E3 ubiquitin-protein ligase listerin	LTN1			0.168654	0.747857	51	51	51	34.4	200.55	144.34	0.0169789	-0.0123881	0.351176	0.318848
U3KQK5;P10176	U3KQK5;P10176	Cytochrome c oxidase subunit 8A, mitochondrial	COX8A			0.168635	0.629977	1	1	1	5.5	17.012	2.3505	0.0991545	-0.115785	0.288181	0.402989
O95298-2;O95298;E9PRJ5;E9PM14;A0A087WUM3;E9PQ53;E9PRQ4;A0A087WY27;O95298-3	O95298-2;O95298;E9PRJ5;E9PM14;A0A087WUM3;E9PQ53	NADH dehydrogenase [ubiquinone] 1 subunit C2;NADH dehydrogenase [ubiquinone] 1 subunit C2, isoform 2	NDUFC2;KCTD14;NDUFC2-KCTD14			0.168625	0.857558	5	5	5	44.8	11.399	7.403	0.0784418	0.0116388	0.188148	0.39627
Q969E8	Q969E8	Pre-rRNA-processing protein TSR2 homolog	TSR2			0.168475	0.478869	2	2	2	11.5	20.894	5.5521	-0.185105	0.0589399	0.4755	0.324564
Q96AG3;Q96AG3-3;E7EVY2;Q96AG3-2;B7Z6C8	Q96AG3;Q96AG3-3	Solute carrier family 25 member 46	SLC25A46			0.168377	0.271702	7	7	7	17.9	46.173	9.6808	0.448272	-0.280335	NaN	0.337193
P15927-3;P15927;P15927-2;Q5TEJ7;Q5TEJ0	P15927-3;P15927;P15927-2;Q5TEJ7	Replication protein A 32 kDa subunit	RPA2			0.168367	0.604696	12	12	12	62.6	38.809	164.54	-0.0487942	-0.0222438	0.365581	0.378926
Q96A49	Q96A49	Synapse-associated protein 1	SYAP1			0.168133	0.998121	17	17	17	47.4	39.933	223.97	0.0945566	0.331247	0.236217	0.0105122
Q02878;F8VZ45;U3KQR5;F8VR69;F8VZA3;F8VWR1;F8VU16	Q02878	60S ribosomal protein L6	RPL6			0.16783	1.19006	21	21	21	49.7	32.728	117.08	0.0774672	0.0575542	0.247442	0.288858
Q15526-2;Q15526;A0A087WYS9	Q15526-2;Q15526;A0A087WYS9	Surfeit locus protein 1	SURF1			0.167379	0.333709	9	9	9	38.2	31.978	20.662	0.00727507	-0.323967	0.493032	0.493175
C9JDJ8;C9JRY4;C9JNZ0;Q96IW7;F8WAU7;C9JR77;C9J463;C9JZ27	C9JDJ8;C9JRY4;C9JNZ0;Q96IW7;F8WAU7;C9JR77;C9J463;C9JZ27	Vesicle-trafficking protein SEC22a	SEC22A			0.167245	1.17517	2	2	2	21	16.089	16.639	0.155132	0.0132121	0.202512	0.298123
Q7L8W6;H0YNH5;H0YND7;Q7L8W6-2	Q7L8W6;H0YNH5;H0YND7	Diphthine--ammonia ligase	DPH6			0.167154	0.726729	7	7	7	29.6	30.306	23.607	-0.0363276	0.0354831	0.357721	0.311739
Q99470;K7ELI9	Q99470	Stromal cell-derived factor 2	SDF2			0.166993	0.288887	6	6	6	39.8	23.026	182.2	-0.061707	-0.343696	0.417272	0.656103
Q9NQE9	Q9NQE9	Histidine triad nucleotide-binding protein 3	HINT3			0.166969	0.679299	5	5	5	33.5	20.361	12.467	0.279231	-0.0776651	0.0742315	0.39208
Q9NXH8	Q9NXH8	Torsin-4A	TOR4A			0.16696	0.323439	4	4	4	18	46.914	13.496	0.372281	-0.156643	-0.192217	0.64442
Q13325-2;Q13325	Q13325-2;Q13325	Interferon-induced protein with tetratricopeptide repeats 5	IFIT5			0.166897	0.13963	7	7	7	16.1	50.519	8.6173	-0.0713507	-0.398342	NaN	0.970384
Q5SRI9	Q5SRI9	Glycoprotein endo-alpha-1,2-mannosidase	MANEA			0.166642	0.811866	4	4	4	10.6	53.67	5.8943	0.322271	0.0263043	0.00302647	0.314966
Q9Y2F5	Q9Y2F5	Little elongation complex subunit 1	ICE1			0.166541	1.20384	6	6	6	3.6	247.89	10.381	0.0230792	0.133564	0.289126	0.220396
Q9Y587;G3V4P7;G3V5J6;G3V3X7;Q9Y587-3;Q9Y587-4;Q9Y587-2	Q9Y587;G3V4P7;G3V5J6;G3V3X7;Q9Y587-3;Q9Y587-4;Q9Y587-2	AP-4 complex subunit sigma-1	AP4S1			0.166431	0.408927	3	3	3	20.1	17.005	6.3092	0.0156366	-0.189993	0.581881	0.258201
Q9Y2E5;E9PCD7;H0YA68;Q9Y2E5-2	Q9Y2E5;E9PCD7;H0YA68;Q9Y2E5-2	Epididymis-specific alpha-mannosidase;Alpha-mannosidase	MAN2B2			0.166295	0.376784	6	6	6	7.4	113.98	7.7496	-0.0102069	0.0127832	0.496309	NaN
P50914;E7EPB3	P50914;E7EPB3	60S ribosomal protein L14	RPL14			0.166249	0.696927	10	10	10	38.1	23.432	34.732	0.109561	-0.095882	0.297368	0.353948
B4E2Q0;P98194-4;P98194;P98194-2;P98194-3;P98194-5;P98194-9;P98194-6;P98194-7;H0Y9V7;P98194-8;H0Y8X9;H0Y9S7;D6RGE9;D6REJ1;D6RHV9	B4E2Q0;P98194-4;P98194;P98194-2;P98194-3;P98194-5;P98194-9;P98194-6;P98194-7;H0Y9V7;P98194-8	Calcium-transporting ATPase;Calcium-transporting ATPase type 2C member 1	ATP2C1			0.166214	0.692644	15	15	14	23.4	104.71	68.341	0.179809	-0.124739	0.34005	0.269738
Q15907;Q15907-2;H3BMH2;H3BSC1;P62491-2;P62491;B4DQU5;M0R2D0	Q15907;Q15907-2;H3BMH2;H3BSC1;P62491-2;P62491	Ras-related protein Rab-11B;Ras-related protein Rab-11A	RAB11B;RAB11A			0.165944	0.943095	13	13	12	60.6	24.488	184.65	0.02157	0.0651587	0.345737	0.231312
O95453-2;O95453;O95453-3;H3BRK1;O95453-4;F5H1Z4	O95453-2;O95453;O95453-3;H3BRK1;O95453-4	Poly(A)-specific ribonuclease PARN	PARN			0.165824	0.621156	26	26	26	42.2	66.574	154.35	0.0904496	-0.114988	0.289834	0.397999
Q14847;Q14847-2;C9J9W2;Q14847-3;F6S2S5;K7ESD6;J3KSN1;O76041-2	Q14847;Q14847-2;C9J9W2;Q14847-3	LIM and SH3 domain protein 1	LASP1			0.165722	0.437775	18	18	18	65.5	29.717	209.21	-0.122209	-0.0846703	0.436162	0.433604
Q96S52;Q96S52-2;K7EN97	Q96S52;Q96S52-2	GPI transamidase component PIG-S	PIGS			0.165497	0.431871	17	17	17	40.7	61.655	121.32	-0.063779	-0.133765	0.343124	0.516409
Q99614;H0YB37	Q99614	Tetratricopeptide repeat protein 1	TTC1			0.165222	0.779798	15	15	14	64	33.526	194.34	-0.0199154	0.0565835	0.380951	0.243267
P62424;Q5T8U3;Q5T8U2	P62424;Q5T8U3	60S ribosomal protein L7a	RPL7A			0.165187	0.804499	19	19	19	55.6	29.995	183.12	0.0733326	-0.036659	0.29725	0.326823
Q9NXK8;Q9NXK8-2;K7ELM5;K7EIR3;K7EPN7;K7EK37	Q9NXK8;Q9NXK8-2	F-box/LRR-repeat protein 12	FBXL12			0.165009	1.20295	9	9	9	39.3	37.026	35.988	0.187066	0.245009	0.229834	-0.00187428
Q13576;F5H7S7;E7EWC2;Q13576-3;Q13576-2;D6R939;E9PDT6;D6RDK8;D6R999;D6RGC6	Q13576;F5H7S7;E7EWC2;Q13576-3;Q13576-2;D6R939	Ras GTPase-activating-like protein IQGAP2	IQGAP2			0.164866	0.124364	59	57	57	47.7	180.58	323.31	1.01138	0.960141	-0.66802	-0.644041
Q9P275;Q9P275-2;A0A075B784;E9PEW0;K7EMM6;K7EIH0;K7EKN3;K7EKL7;K7ELR5;Q8IXW9;K7EIT7;K7EQS0;K7EPT1	Q9P275;Q9P275-2;A0A075B784	Ubiquitin carboxyl-terminal hydrolase 36;Ubiquitin carboxyl-terminal hydrolase	USP36			0.16477	0.523434	25	25	25	30.5	122.65	104.53	-0.0651587	-0.0614357	0.400319	0.385356
Q8IY17-2;Q8IY17-3;Q8IY17;Q8IY17-4;Q8IY17-5;M0R2C2;M0R2K2;M0QYT1;M0R2H4;M0QYF5;M0QZK5;M0QXH7;F2Z2D4;Q6ZV29-2	Q8IY17-2;Q8IY17-3;Q8IY17;Q8IY17-4;Q8IY17-5	Neuropathy target esterase	PNPLA6			0.164634	0.47836	23	23	21	21.8	146.21	99.268	-0.0253123	-0.0846397	0.226262	0.542227
H0YH69;Q9HBU6;Q9HBU6-2;H0YFP7	H0YH69;Q9HBU6;Q9HBU6-2	Ethanolamine kinase 1	ETNK1			0.164427	0.204229	6	6	6	20.2	47.597	19.107	-0.328377	-0.318632	0.924176	0.38054
Q9H7D7-2	Q9H7D7-2					0.16439	0.543089	17	17	1	37.8	70.459	73.357	-0.0554733	-0.0545271	0.408494	0.359065
Q96RU3-5;Q96RU3-2;Q96RU3-3;Q96RU3;B7ZL14;H0Y7W6;Q96RU3-4	Q96RU3-5;Q96RU3-2;Q96RU3-3;Q96RU3;B7ZL14;H0Y7W6;Q96RU3-4	Formin-binding protein 1	FNBP1			0.164385	0.785692	25	25	25	52.9	70.751	192.5	0.080088	-0.0476366	0.300182	0.324907
Q7Z5G4;Q7Z5G4-3	Q7Z5G4;Q7Z5G4-3	Golgin subfamily A member 7	GOLGA7			0.16412	0.534928	6	6	6	48.2	15.824	16.899	-0.0229005	-0.0674248	0.267715	0.47909
E7EPT4;P19404	E7EPT4;P19404	NADH dehydrogenase [ubiquinone] flavoprotein 2, mitochondrial	NDUFV2			0.164101	0.70954	13	13	13	56.3	27.907	60.254	0.140539	-0.0948956	0.236462	0.374299
Q6UW02;E9PHG5;Q6UW02-2;F8WBE2;C9J8K7;Q8WZ13	Q6UW02;E9PHG5;Q6UW02-2;F8WBE2;C9J8K7	Cytochrome P450 20A1	CYP20A1			0.164077	0.936622	11	11	11	29.9	52.432	55.977	0.141844	0.102053	0.0342158	0.378194
Q8TBE9	Q8TBE9	N-acylneuraminate-9-phosphatase	NANP			0.163601	0.436103	7	7	7	33.9	27.813	25.581	-0.140386	0.419755	0.438399	-0.0633648
O95864;O95864-3;O95864-4;O95864-2;E5RGZ5;E5RGD8	O95864;O95864-3;O95864-4;O95864-2	Fatty acid desaturase 2	FADS2			0.163545	0.532338	12	12	11	25.2	52.259	40.446	0.112147	-0.179515	0.380286	0.341263
P07384;E9PL37;E9PRM1;E9PLX0;E9PJJ3;E9PLC9;E9PMC6;E9PJA6;E9PSA6;E9PQB3;E9PIA9	P07384	Calpain-1 catalytic subunit	CAPN1			0.163474	1.02554	38	38	38	63.9	81.889	323.31	0.0652194	0.0289935	0.279768	0.279914
P17066;P48741	P17066;P48741	Heat shock 70 kDa protein 6;Putative heat shock 70 kDa protein 7	HSPA6;HSPA7			0.163333	1.22407	12	2	2	16.8	71.027	43.779	0.0443449	0.147828	0.311736	0.149425
Q5T447;Q5T447-2	Q5T447	E3 ubiquitin-protein ligase HECTD3	HECTD3			0.163235	0.777197	16	16	16	23.3	97.112	109.17	0.137156	-0.0765389	0.254473	0.337849
Q96RD7-2;Q96RD7	Q96RD7-2;Q96RD7	Pannexin-1	PANX1			0.162902	0.635463	3	3	3	9.7	47.634	9.0373	0.0810185	-0.107819	0.332622	0.345784
P50583	P50583	Bis(5-nucleosyl)-tetraphosphatase [asymmetrical]	NUDT2			0.162813	0.679867	9	9	9	83.7	16.829	53.328	-0.0306892	0.0048968	0.317072	0.359971
Q9P2Y5;E9PR71;Q9P2Y5-2;E9PK00;H0YDD1	Q9P2Y5;E9PR71	UV radiation resistance-associated gene protein	UVRAG			0.162633	0.595355	28	28	28	40.2	78.15	69.09	-0.00992037	-0.0606531	0.393306	0.327801
P24534;C9JZW3;F2Z2G2;F8WF65	P24534	Elongation factor 1-beta	EEF1B2			0.162298	0.915768	16	12	12	87.1	24.763	191.2	0.0469956	0.0169242	0.306146	0.279126
Q92598;Q92598-2;Q92598-3;Q92598-4;A0A0A0MSM0;Q5TBM3;R4GN69	Q92598;Q92598-2;Q92598-3;Q92598-4;A0A0A0MSM0	Heat shock protein 105 kDa	HSPH1			0.162202	0.679544	65	62	61	78.1	96.864	323.31	-0.0271541	0.00561564	0.379954	0.290392
Q9P1U0	Q9P1U0	DNA-directed RNA polymerase I subunit RPA12	ZNRD1			0.162112	0.470583	3	3	3	27.8	13.904	11.233	0.230042	-0.258753	0.328032	0.349125
O43181;D6REP1;D6R916;H0Y9M8;D6RI09	O43181	NADH dehydrogenase [ubiquinone] iron-sulfur protein 4, mitochondrial	NDUFS4			0.162086	1.3004	5	5	5	30.9	20.108	12.676	0.137981	0.0668125	0.136979	0.306573
O95197-3;B7Z4M1;O95197-6;O95197-5;O95197-4;F5H891;F5GWG7;F5H617	O95197-3;B7Z4M1;O95197-6;O95197-5;O95197-4	Reticulon-3;Reticulon	RTN3			0.162068	0.353617	4	4	2	28.8	25.609	40.822	-0.136716	-0.173645	0.513996	0.444635
A0A087X2D5;Q9BRJ2;A0A0G2JMS5;A0A087WU62	A0A087X2D5;Q9BRJ2;A0A0G2JMS5;A0A087WU62	39S ribosomal protein L45, mitochondrial	MRPL45			0.161856	0.472658	14	14	14	52.3	35.29	113.17	0.019185	-0.127636	0.229588	0.526286
J3QLD9;E7EMK3;Q14254;K7EKW9	J3QLD9;E7EMK3;Q14254;K7EKW9	Flotillin-2	FLOT2			0.161793	0.567561	22	22	22	55.4	47.142	174.54	-0.0615688	-0.0294702	0.350724	0.387487
Q8N3Z3;Q9P025;A0A087WUP3;Q8N3Z3-2;F8WBY6;C9J8V5;C9J0K3;Q8N3Z3-3	Q8N3Z3;Q9P025;A0A087WUP3;Q8N3Z3-2;F8WBY6;C9J8V5	GTP-binding protein 8	GTPBP8			0.161742	0.671218	5	5	5	21.8	32.146	6.3379	0.190964	-0.00618795	NaN	0.300448
P47914;F8WF43;C9IYI4	P47914	60S ribosomal protein L29	RPL29			0.161582	0.688232	4	4	4	21.4	17.752	11.58	-0.0106367	-0.0115443	0.35727	0.311238
Q2NKX8;B5MDQ0	Q2NKX8;B5MDQ0	DNA excision repair protein ERCC-6-like	ERCC6L			0.161334	0.70601	49	49	49	42.9	141.1	323.31	0.108332	-0.0923248	0.309293	0.320036
Q7Z422-5;Q7Z422;Q7Z422-2;Q7Z422-4;Q7Z422-3	Q7Z422-5;Q7Z422;Q7Z422-2;Q7Z422-4;Q7Z422-3	SUZ domain-containing protein 1	SZRD1			0.161292	0.440072	5	5	5	47	16.91	72.174	0.0757024	-0.198212	0.519844	0.247834
Q02978;I3L1P8;Q02978-2	Q02978;I3L1P8;Q02978-2	Mitochondrial 2-oxoglutarate/malate carrier protein	SLC25A11			0.161076	0.663369	21	21	21	72.6	34.061	154.52	0.363178	0.188021	-0.127289	0.220396
E9PMC9;Q7Z589-6;Q7Z589;Q7Z589-5;Q7Z589-4;Q7Z589-7;Q7Z589-2;E9PPE6;H0YCS3;H0YET8;Q7Z589-3	E9PMC9;Q7Z589-6;Q7Z589;Q7Z589-5;Q7Z589-4;Q7Z589-7;Q7Z589-2	Protein EMSY	C11orf30;EMSY			0.161018	0.725764	9	9	9	9.3	130.69	21.401	0.0290285	-0.0140916	0.394075	0.235059
Q9H871;Q9H871-2	Q9H871	Protein RMD5 homolog A	RMND5A			0.160886	0.699691	10	10	10	30.7	43.992	30.732	0.0264402	-0.0247367	0.397803	0.244036
E9PFB9;J3KP97;Q5T9S5-2;Q5T9S5;Q5T9S2	E9PFB9;J3KP97;Q5T9S5-2;Q5T9S5;Q5T9S2	Coiled-coil domain-containing protein 18	CCDC18			0.160861	1.18849	8	8	8	7.2	151.32	12.705	0.0399776	0.29125	0.0994973	0.212718
Q9NQX4;Q9NQX4-2	Q9NQX4	Unconventional myosin-Vc	MYO5C			0.16084	0.294937	6	3	3	3.8	202.81	1.9833	-0.0263043	-0.265969	0.199123	0.736509
P80217;P80217-2	P80217;P80217-2	Interferon-induced 35 kDa protein	IFI35			0.160818	0.564447	19	19	19	79	31.546	107.51	0.032979	-0.112085	0.389897	0.33248
O60906;H0Y5N2	O60906	Sphingomyelin phosphodiesterase 2	SMPD2			0.160636	0.258715	6	6	6	20.3	47.645	11.079	0.262676	-0.370583	-0.0161764	0.766627
Q9UKY7;Q9UKY7-2;H0Y8K3;D6R9V8;D6RFH2;Q9UKY7-3;D6RDN0;D6RAV0;D6R973	Q9UKY7;Q9UKY7-2;H0Y8K3	Protein CDV3 homolog	CDV3		+	0.160583	2.01713	13	13	13	74.4	27.335	323.31	0.0872736	0.181802	0.215244	0.158011
Q9H999;E5RHA5;V9GYZ0;Q9BZ23-3;Q9BZ23-4;Q9BZ23	Q9H999;E5RHA5	Pantothenate kinase 3	PANK3		+	0.160555	1.63034	4	4	3	14.1	41.094	9.5463	0.203004	0.0833836	0.112633	0.243199
Q9BT22;Q9BT22-2;K7EID2;A0A087WZJ8;Q6GMV1;K7EPU3;C9J202;K7EQK1	Q9BT22;Q9BT22-2	Chitobiosyldiphosphodolichol beta-mannosyltransferase	ALG1			0.160417	0.768179	12	12	12	31.9	52.518	64.651	0.171157	-0.0463846	0.128557	0.388337
Q9P0J0;Q9P0J0-2;B4DEZ3;K7EJE1;E7ENQ6;U3KQP3;K7EP87	Q9P0J0;Q9P0J0-2;B4DEZ3;K7EJE1;E7ENQ6	NADH dehydrogenase [ubiquinone] 1 alpha subcomplex subunit 13	NDUFA13			0.159975	0.555193	12	12	12	68.8	16.698	92.425	0.122617	-0.134461	0.197236	0.454506
P27694;I3L4R8;I3L524;I3L2M5	P27694;I3L4R8	Replication protein A 70 kDa DNA-binding subunit;Replication protein A 70 kDa DNA-binding subunit, N-terminally processed	RPA1			0.159615	0.553435	39	39	39	56	68.137	323.31	-0.0640551	-0.0199016	0.44159	0.280825
F8W9A8;B7WPL9;Q6PFW1-5;Q6PFW1-7;Q6PFW1-4;Q6PFW1-3;Q6PFW1-2;Q6PFW1;Q6PFW1-6;H7C398;H0Y3Y5	F8W9A8;B7WPL9;Q6PFW1-5;Q6PFW1-7;Q6PFW1-4;Q6PFW1-3;Q6PFW1-2;Q6PFW1;Q6PFW1-6	Inositol hexakisphosphate and diphosphoinositol-pentakisphosphate kinase 1	PPIP5K1			0.158896	0.549172	11	5	5	9.8	156.65	9.3574	-0.038998	0.178492	NaN	0.337193
P14316-2;P14316;D6R9N5;D6RB08;K4DIA5;D6RED1;R4GNI0;C9JD95;C9J9C5;V9P921;P10914	P14316-2;P14316;D6R9N5;D6RB08;K4DIA5	Interferon regulatory factor 2	IRF2		+	0.158862	2.58657	7	7	7	22.2	39.156	15.606	0.147729	0.131458	0.208517	0.147745
Q66LE6;H0YB06	Q66LE6	Serine/threonine-protein phosphatase 2A 55 kDa regulatory subunit B delta isoform	PPP2R2D			0.158733	0.627044	12	4	3	28.9	52.042	8.7635	-0.0825664	0.0385766	0.323774	0.355147
O75665-3;O75665;A6NF31;A0A0A0MS89;O75665-2	O75665-3;O75665;A6NF31	Oral-facial-digital syndrome 1 protein	OFD1			0.158702	0.863709	12	12	12	15.2	111.74	17.739	0.0386434	0.00762616	0.304044	0.284493
P61160;P61160-2;F5H6T1	P61160;P61160-2;F5H6T1	Actin-related protein 2	ACTR2			0.158527	0.719215	24	24	24	65.5	44.76	323.31	-0.00776948	0.00273846	0.355806	0.283334
P41091;Q2VIR3;F8W810;Q2VIR3-2;H7BZU1	P41091;Q2VIR3;F8W810;Q2VIR3-2	Eukaryotic translation initiation factor 2 subunit 3;Putative eukaryotic translation initiation factor 2 subunit 3-like protein	EIF2S3;EIF2S3L			0.158519	1.01197	29	29	29	64	51.109	323.31	0.0816596	0.010923	0.26123	0.280265
Q9HD45;Q5TB53	Q9HD45;Q5TB53	Transmembrane 9 superfamily member 3	TM9SF3			0.15826	0.511605	15	15	15	25.8	67.887	128	0.0169645	-0.0794933	0.186754	0.508814
Q9BSH5	Q9BSH5	Haloacid dehalogenase-like hydrolase domain-containing protein 3	HDHD3			0.158121	0.643072	13	13	13	43	28	79.935	0.0630474	-0.0790208	0.251446	0.397011
Q6NUM9;H7C3J0;Q6NUM9-2;H7BZ81;H7BZ16;H0YGU3	Q6NUM9;H7C3J0;Q6NUM9-2	All-trans-retinol 13,14-reductase	RETSAT			0.158045	0.347989	18	18	18	35.9	66.819	74.78	0.0468912	-0.276765	0.278698	0.583355
P86791;P86790;F8WD66	P86791;P86790	Vacuolar fusion protein CCZ1 homolog;Vacuolar fusion protein CCZ1 homolog B	CCZ1;CCZ1B			0.158018	0.650804	21	21	21	49.8	55.866	122.12	0.133844	-0.0756113	0.146264	0.427576
Q00325-2;Q00325;F8VVM2;F8VWQ0;F8VZL5;F8VWR4	Q00325-2;Q00325;F8VVM2	Phosphate carrier protein, mitochondrial	SLC25A3			0.158015	0.510315	18	18	18	44	39.958	77.077	0.268348	-0.101877	-0.00128459	0.466875
D6RCP8;O43766;O43766-2;O43766-3	D6RCP8;O43766;O43766-2;O43766-3	Lipoyl synthase, mitochondrial	LIAS			0.157971	0.386732	5	5	5	19.8	27.509	7.9404	0.0171543	-0.188578	0.214125	0.589181
P05023-4;P05023;P05023-3;P05023-2;Q5TC01;Q5TC02;Q5TC05	P05023-4;P05023;P05023-3;P05023-2	Sodium/potassium-transporting ATPase subunit alpha-1	ATP1A1			0.157955	1.21062	51	51	31	47.5	113	323.31	0.168998	0.00532815	0.1995	0.257994
Q12899;A2AE48;A0A0G2JIW2;Q5SPU2;A2AE50	Q12899;A2AE48	Tripartite motif-containing protein 26	TRIM26			0.157832	0.572116	16	16	16	36.9	62.165	37.649	-0.0209111	-0.0585781	0.303109	0.407708
Q5SXM8;Q5SXM7	Q5SXM8;Q5SXM7	DNL-type zinc finger protein	DNLZ			0.157518	0.424739	3	3	3	21.3	19.204	13.373	0.3531	0.478816	-0.131866	-0.0699771
Q14814-4;Q14814;Q14814-6;Q14814-5;Q14814-3;Q14814-2;Q05BX2	Q14814-4;Q14814;Q14814-6;Q14814-5;Q14814-3;Q14814-2;Q05BX2	Myocyte-specific enhancer factor 2D	MEF2D		+	0.157468	1.72077	9	8	6	20.4	55.113	35.756	0.210546	0.218471	0.121148	0.0797066
P62917;E9PKU4;E9PKZ0;G3V1A1;E9PP36	P62917;E9PKU4;E9PKZ0;G3V1A1	60S ribosomal protein L8	RPL8			0.157418	0.960476	24	24	24	61.1	28.024	323.31	0.0787616	0.00446549	0.24062	0.305824
Q5T5C0-2;Q5T5C0;Q5T5C0-3;Q5JRH0;Q3B794;H0Y332	Q5T5C0-2;Q5T5C0;Q5T5C0-3	Syntaxin-binding protein 5	STXBP5			0.157356	0.271902	7	7	7	10	123.49	14.331	0.108472	0.0292761	-0.289457	0.781132
P04844;P04844-2;Q5JYR7;Q5JYR4;F2Z3K5;Q5JYR3	P04844;P04844-2	Dolichyl-diphosphooligosaccharide--protein glycosyltransferase subunit 2	RPN2			0.157215	0.726247	36	36	31	64.3	69.283	323.31	0.349677	0.0309717	-0.0300741	0.278286
P40121;P40121-2;E7ENU9;B8ZZL6;H7C0X8	P40121;P40121-2;E7ENU9;B8ZZL6	Macrophage-capping protein	CAPG			0.157141	0.338331	14	14	14	43.7	38.498	77.525	0.601606	0.317188	-0.0884695	-0.201759
O95167;H7C0D7;S4R3I5;H7C2R1;A8MVM8;S4R3T6;A8MYJ8	O95167;H7C0D7;S4R3I5;H7C2R1;A8MVM8;S4R3T6;A8MYJ8	NADH dehydrogenase [ubiquinone] 1 alpha subcomplex subunit 3	NDUFA3			0.156858	0.418204	2	2	2	50	9.2787	7.0751	0.117208	-0.241628	0.489954	0.261898
O95235-2;O95235;H0YAC9;D6RBN1	O95235-2;O95235	Kinesin-like protein KIF20A	KIF20A			0.15638	0.298363	7	7	7	9.5	98.099	17.432	0.132293	0.685806	-0.320955	0.128377
Q8IY37;F5H3Y4	Q8IY37;F5H3Y4	Probable ATP-dependent RNA helicase DHX37	DHX37			0.15635	0.297591	37	37	37	38.6	129.54	165.45	0.128756	-0.407957	0.359409	0.545192
A0A087WUT6;O60841	A0A087WUT6;O60841	Eukaryotic translation initiation factor 5B	EIF5B			0.156166	1.03714	78	78	78	52.3	138.68	323.31	0.0610895	0.032242	0.280481	0.250852
P30622-2;P30622-1;P30622;J3KP58;F5H0N7;F5H6A0;F6VGP8;F5H1T5;F5H367;F5H270	P30622-2;P30622-1;P30622;J3KP58;F5H0N7;F5H6A0	CAP-Gly domain-containing linker protein 1	CLIP1			0.156166	0.478032	14	14	14	12.1	156.78	25.989	-0.172744	0.0698396	0.267596	0.459973
O75351;K7EL71;K7EKZ3	O75351	Vacuolar protein sorting-associated protein 4B	VPS4B			0.156	0.782792	26	26	20	56.5	49.301	271.57	0.0505173	-0.0277926	0.317767	0.28351
Q86UX7-2;Q86UX7;F5H1C6;H0YFT5;F5H3I6;G3V1L6;Q9BQL6-3	Q86UX7-2;Q86UX7;F5H1C6	Fermitin family homolog 3	FERMT3		+	0.155754	1.53302	48	48	47	71.6	75.429	323.31	0.246858	0.0688771	0.115033	0.192249
P51970	P51970	NADH dehydrogenase [ubiquinone] 1 alpha subcomplex subunit 8	NDUFA8			0.155569	0.49618	11	11	11	73.8	20.105	101.11	0.0377545	-0.155582	0.340391	0.399711
Q9HCE3;K7EIU3;K7EMF9;K7ER18;K7EKV7;K7EJM2;K7EP49;K7EL14;K7EPI7;K7EQW7;K7ES47;K7ELB7	Q9HCE3	Zinc finger protein 532	ZNF532			0.155361	0.718206	11	10	10	10.3	141.69	19.728	0.222145	0.375179	0.0777899	-0.0536674
Q13535;Q13535-2;Q13535-3;H0Y9K2;D6RFJ6;H0Y8Y6;H0Y8R8;D6RIG7	Q13535;Q13535-2;Q13535-3	Serine/threonine-protein kinase ATR	ATR			0.155329	0.511066	38	38	38	15.8	301.36	101.32	-0.0436245	-0.0840891	0.3639	0.38513
Q52LJ0-2;Q52LJ0;H0YNA1	Q52LJ0-2;Q52LJ0	Protein FAM98B	FAM98B			0.155327	0.687967	16	16	13	49.2	45.547	177.13	-0.0457225	0.0270125	0.328492	0.311524
C9J5J4;H7C4T7;H0Y322;Q5TKA1-3;Q5TKA1;Q5TKA1-2;B1B047	C9J5J4;H7C4T7;H0Y322;Q5TKA1-3;Q5TKA1;Q5TKA1-2	Protein lin-9 homolog	LIN9			0.155073	0.260376	6	6	6	17	55.933	14.888	0.16083	-0.382796	0.742006	0.100252
Q6ZUT1-3;Q6ZUT1;Q6ZUT1-2;E9PQL5;E9PSC8;E9PKA8	Q6ZUT1-3;Q6ZUT1;Q6ZUT1-2;E9PQL5;E9PSC8;E9PKA8	Uncharacterized protein C11orf57	C11orf57			0.155035	0.583719	2	2	2	9.8	30.844	12.782	NaN	0.237564	0.271306	-0.0437644
Q8NCF5;Q8NCF5-2;H3BSZ7;Q8NCF5-3	Q8NCF5;Q8NCF5-2;H3BSZ7;Q8NCF5-3	NFATC2-interacting protein	NFATC2IP			0.15493	0.353401	8	8	8	24.3	45.816	55.753	0.0583077	-0.280913	0.298541	0.543783
Q9UIS9-7;Q9UIS9-5;Q9UIS9-10;Q9UIS9;Q9UIS9-9;A0A0A0MS90;Q9UIS9-4;Q9UIS9-11;Q9UIS9-8;Q9UIS9-12;Q9UIS9-2;K7EN65;Q9UIS9-6;K7EPZ6;K7EMA9	Q9UIS9-7;Q9UIS9-5;Q9UIS9-10;Q9UIS9;Q9UIS9-9;A0A0A0MS90;Q9UIS9-4;Q9UIS9-11;Q9UIS9-8;Q9UIS9-12;Q9UIS9-2;K7EN65;Q9UIS9-6	Methyl-CpG-binding domain protein 1	MBD1			0.154907	0.289679	7	7	7	16.9	60.001	10.55	0.463151	-0.288717	-0.113302	0.558495
Q9NUQ2;H0YC22	Q9NUQ2;H0YC22	1-acyl-sn-glycerol-3-phosphate acyltransferase epsilon	AGPAT5			0.154711	0.389751	12	12	12	33.5	42.072	57.965	-0.0214797	-0.193486	0.313246	0.520563
Q07820;A0A087WT64;Q07820-2	Q07820;A0A087WT64;Q07820-2	Induced myeloid leukemia cell differentiation protein Mcl-1	MCL1			0.154675	0.219476	5	5	5	19.7	37.337	12.326	0.0105993	-0.436881	0.194213	0.850767
E7EQZ4;Q16637-3;Q16637;Q16637-4;Q16637-2;B4DP61;H0YBZ9;A0A0G2JRX5;A0A0G2JRY6	E7EQZ4;Q16637-3;Q16637;Q16637-4;Q16637-2;B4DP61	Survival motor neuron protein	SMN1;SMN2			0.15451	0.897093	8	8	8	26.5	31.689	68.525	0.237728	0.131589	0.291368	-0.0426443
J3KPP4;O95232;D6RDI2;C9JL41;O95232-2;D6RHH0;H7C5U7;U3KQT3;H0YA81;E7EN55;H0YBV7;H0YAR4	J3KPP4;O95232	Luc7-like protein 3	LUC7L3			0.154433	0.898158	23	23	23	38.9	58.22	323.31	-0.0172093	0.139208	0.341872	0.153864
P30260;P30260-2;F6QPS0;I3L394;I3L3H6;I3L2Z8;I3L225;K7EMA6;E9PRZ6	P30260;P30260-2	Cell division cycle protein 27 homolog	CDC27			0.154431	0.389034	25	25	1	43.6	91.866	93.485	-0.126312	-0.120451	0.397474	0.467015
H0Y621;H0Y5K5;Q9Y282;Q9Y282-3;Q9Y282-2;H0Y802;H0Y6Z0;A6PVJ2;A0A0C4DH46	H0Y621;H0Y5K5;Q9Y282;Q9Y282-3;Q9Y282-2	Endoplasmic reticulum-Golgi intermediate compartment protein 3	ERGIC3			0.154421	0.517589	8	8	8	23.9	36.851	17.478	0.0855885	-0.147953	0.236217	0.443831
Q14643-4;Q14643-3;Q14643-8;Q14643-7;Q14643-5;Q14643-6;Q14643-2;Q14643;B7ZMI3	Q14643-4;Q14643-3;Q14643-8;Q14643-7;Q14643-5;Q14643-6;Q14643-2;Q14643	Inositol 1,4,5-trisphosphate receptor type 1	ITPR1			0.154405	1.14482	46	38	35	19.7	306.77	163.9	0.2001	0.0150693	0.122606	0.279844
Q5W0V3;Q5W0V3-2;Q5W0V4	Q5W0V3;Q5W0V3-2	Protein FAM160B1	FAM160B1			0.154227	1.23546	13	13	12	22.4	86.557	26.8	0.169031	0.0054719	0.20364	0.238766
Q92538-3;Q92538-2;Q92538	Q92538-3;Q92538-2;Q92538	Golgi-specific brefeldin A-resistance guanine nucleotide exchange factor 1	GBF1			0.154133	0.58407	48	48	48	33.3	206.01	294.63	-0.0518593	-0.0195652	0.297485	0.390472
Q8IY81;J3KS36;J3QSE2	Q8IY81	pre-rRNA processing protein FTSJ3	FTSJ3			0.153962	0.331824	32	32	32	49.4	96.557	258.23	-0.110764	-0.216854	0.468531	0.474933
Q86VS8;H0YE69;H0YDK4	Q86VS8	Protein Hook homolog 3	HOOK3			0.153888	0.765827	29	29	20	46	83.125	162.03	0.03292	0.0439044	0.402286	0.136442
Q01518;Q5T0R1;Q5T0R7;Q5T0R6;Q5T0R5;Q5T0R4;Q5T0R3;Q5T0R2;Q5T0S3;Q5T0R8;B7Z385;A0A087X0J3;A0A087WZ15;E9PDI2;P40123-3;P40123-2;P40123	Q01518	Adenylyl cyclase-associated protein 1	CAP1			0.153611	0.888246	34	34	1	64.4	51.901	323.31	-0.0284277	0.229834	0.309176	0.10386
Q9H6R0;I3L1L6;Q9H6R0-2;Q05BE5;I3L0M5	Q9H6R0;I3L1L6;Q9H6R0-2	Putative ATP-dependent RNA helicase DHX33	DHX33			0.153537	0.528953	25	25	25	42.9	78.873	68.883	-0.0490732	-0.0572416	0.303576	0.416885
Q6DD88;F5GWF8	Q6DD88	Atlastin-3	ATL3			0.153506	0.512302	25	25	1	62.5	60.541	243.87	0.164998	-0.135998	0.111833	0.47319
Q9H9B4;D6RFI0;S4R2X2;D6RDG7;D6RAE9	Q9H9B4;D6RFI0	Sideroflexin-1	SFXN1			0.153472	0.717099	16	16	15	61.2	35.619	206.02	0.283896	-0.0405711	0.037593	0.332971
Q9H0K6;F8VZA0;Q9H0K6-2;F8VW99;F8VP66;F8VWC0	Q9H0K6;F8VZA0	Pseudouridylate synthase 7 homolog-like protein	PUS7L		+	0.153261	1.65733	29	29	29	47.5	80.7	97.459	0.248091	0.0915306	0.110898	0.162525
Q9H7E9;Q9H7E9-2	Q9H7E9;Q9H7E9-2	UPF0488 protein C8orf33	C8orf33			0.153135	0.530017	7	7	7	38.4	24.992	69.047	0.0943719	-0.156097	0.27011	0.404153
P62495;B7Z7P8;P62495-2;I3L492;D6RJE8;D6RCB3	P62495;B7Z7P8;P62495-2	Eukaryotic peptide chain release factor subunit 1	ETF1			0.153018	0.859662	31	31	31	77.6	49.03	323.31	-0.0223323	0.0951818	0.334225	0.204998
O43677	O43677	NADH dehydrogenase [ubiquinone] 1 subunit C1, mitochondrial	NDUFC1			0.152622	0.363822	3	3	3	32.9	8.7341	15.299	0.150385	-0.310647	0.287472	0.483279
O75396;A0A087X1A9	O75396	Vesicle-trafficking protein SEC22b	SEC22B		+	0.152538	2.06679	13	13	13	48.4	24.593	153.51	0.158091	0.0890913	0.153157	0.209812
Q9BX69;A0A0B4J1T5	Q9BX69	Caspase recruitment domain-containing protein 6	CARD6			0.152217	0.43809	12	12	12	16.1	116.47	36.274	0.00865327	-0.118429	0.178874	0.539771
Q8IX04;Q8IX04-6;Q8IX04-2;Q8IX04-3;Q8IX04-7;Q8IX04-4;Q8IX04-5;A8MYV4	Q8IX04;Q8IX04-6;Q8IX04-2;Q8IX04-3;Q8IX04-7;Q8IX04-4	Ubiquitin-conjugating enzyme E2 variant 3	UEVLD			0.152109	0.556868	10	10	10	26.5	52.263	34.16	-0.0740944	0.0893625	0.472072	0.121094
P35626;Q8N433;H7C099	P35626;Q8N433	Beta-adrenergic receptor kinase 2	ADRBK2			0.151968	0.430565	14	5	5	25.4	79.709	9.0351	-0.0090604	-0.171758	0.353097	0.435593
Q147X3-2;Q147X3;J3KNC2;B4DK34;G3V3I2	Q147X3-2;Q147X3;J3KNC2	N-alpha-acetyltransferase 30	NAA30			0.151935	1.17091	10	10	10	38.5	35.579	41.064	0.181608	0.12499	0.0210533	0.280089
F8WAJ0;Q9H8H2;Q9H8H2-2;Q9H8H2-4;Q9H8H2-3	F8WAJ0;Q9H8H2;Q9H8H2-2;Q9H8H2-4	Probable ATP-dependent RNA helicase DDX31	DDX31			0.15192	0.468941	24	24	24	39.4	83.515	72.864	0.262798	-0.168463	0.0579701	0.455376
Q9ULP9-2;Q9ULP9;A0A0D9SFR5;H3BQ06;H3BV07	Q9ULP9-2;Q9ULP9;A0A0D9SFR5;H3BQ06	TBC1 domain family member 24	TBC1D24			0.151826	0.582755	12	12	12	22.4	62.317	29.316	-0.0947764	0.0329472	0.293017	0.376114
Q5SWX8-3;Q5SWX8-4;Q5SWX8;Q5SWX8-2	Q5SWX8-3;Q5SWX8-4;Q5SWX8;Q5SWX8-2	Protein odr-4 homolog	ODR4			0.151627	0.779257	7	7	7	25.4	37.773	99.283	-0.0282861	0.0503276	0.269033	0.315433
E9PNU1;B4DXC8;Q9Y5B8;Q9Y5B8-2	E9PNU1;B4DXC8;Q9Y5B8;Q9Y5B8-2	Nucleoside diphosphate kinase 7	NME7			0.151606	0.602723	8	8	8	40.2	28.888	17.342	0.109935	-0.0301919	0.458592	0.0680901
Q8TEA7-2;Q8TEA7;Q8TEA7-3;Q5HYF5;D6RDG2;D6RDY5	Q8TEA7-2;Q8TEA7;Q8TEA7-3	TBC domain-containing protein kinase-like protein	TBCK			0.15153	0.606526	5	5	5	6.4	96.442	6.0577	0.200813	-0.157528	0.245374	0.317463
Q13610;B4DJV5;F8VZ56;Q13610-2	Q13610;B4DJV5	Periodic tryptophan protein 1 homolog	PWP1			0.151435	0.630671	25	25	25	54.5	55.827	236.6	-0.0023065	-0.0464591	0.321697	0.332807
Q8WWM7;Q8WWM7-6;Q8WWM7-8;Q8WWM7-5;Q8WWM7-4;Q8WWM7-9;Q8WWM7-2;Q8WWM7-3;H3BUF6;Q8WWM7-7;H3BSK9;H3BUE3;H3BSQ5;H3BRB0;A0A0C4DGL7	Q8WWM7;Q8WWM7-6;Q8WWM7-8;Q8WWM7-5;Q8WWM7-4;Q8WWM7-9;Q8WWM7-2;Q8WWM7-3;H3BUF6	Ataxin-2-like protein	ATXN2L			0.151318	0.536358	44	44	44	42.3	113.37	323.31	-0.00417774	-0.0970389	0.369606	0.336883
Q96JC9;F8WFA5	Q96JC9;F8WFA5	ELL-associated factor 1	EAF1			0.15121	0.238602	5	5	4	20.9	29.042	4.9797	-0.0359054	-0.117709	NaN	0.607243
Q96AZ6;H0YMM4;H3BLY5;Q96AZ6-2	Q96AZ6;H0YMM4	Interferon-stimulated gene 20 kDa protein	ISG20			0.15093	0.495729	14	14	14	75.1	20.363	247.53	0.398437	0.337426	-0.101737	-0.0304066
Q5JPH6;H3BTB7;Q5JPH6-2	Q5JPH6;H3BTB7;Q5JPH6-2	Probable glutamate--tRNA ligase, mitochondrial	EARS2		+	0.150893	1.50612	9	9	9	30.4	58.688	52.518	0.0399776	0.185232	0.221815	0.156547
Q8IU68;Q8IU68-2;K7EJ72	Q8IU68;Q8IU68-2	Transmembrane channel-like protein 8	TMC8			0.150662	0.382601	4	4	4	5.9	81.64	2.799	-0.0913952	0.125783	NaN	0.417598
Q9BRX5;Q9BRX5-3;Q9BRX5-2	Q9BRX5;Q9BRX5-3;Q9BRX5-2	DNA replication complex GINS protein PSF3	GINS3			0.150566	0.62056	15	15	15	87.5	24.534	89.713	-0.0557509	0.00288247	0.325502	0.329631
P04233-2;P04233;H0YBZ2;E7EQJ3;H0YBZ8;E7ESL3;P04233-3;E7ER71	P04233-2;P04233;H0YBZ2	HLA class II histocompatibility antigen gamma chain	CD74			0.149842	0.258278	8	8	8	42.2	26.398	74.516	0.0255294	-0.35345	0.201508	0.72578
F5H702;Q96GC5-3;Q96GC5;F5H8D0	F5H702;Q96GC5-3;Q96GC5	39S ribosomal protein L48, mitochondrial	MRPL48			0.149588	0.549672	4	4	4	40.7	12.77	54.665	0.170443	-0.173824	0.245496	0.356236
Q9UKT9;Q9UKT9-3;Q9UKT9-6;Q9UKT9-4;Q9UKT9-7;Q9UKT9-8;Q9UKT9-2;Q9UKT9-5;Q9UKT9-13;Q9UKT9-9;Q9UKT9-15;Q9UKT9-14;Q9UKT9-10;Q9UKT9-11;Q9UKT9-16;Q9UKT9-12;A0A0C4DGN9;A0A087WYH1;A0A087WV78;Q2VY69	Q9UKT9;Q9UKT9-3;Q9UKT9-6;Q9UKT9-4;Q9UKT9-7;Q9UKT9-8;Q9UKT9-2;Q9UKT9-5;Q9UKT9-13;Q9UKT9-9;Q9UKT9-15;Q9UKT9-14;Q9UKT9-10	Zinc finger protein Aiolos	IKZF3			0.149414	0.677521	23	23	19	61.7	58.023	179.2	-0.00949054	-0.010178	0.260869	0.356458
O94925-3;B8ZZA8;B8ZZC5	O94925-3	Glutaminase kidney isoform, mitochondrial	GLS			0.149384	0.408939	26	3	3	52.2	65.459	125.28	0.221707	-0.280195	0.247685	0.40834
P29692;E9PRY8;P29692-2;E9PK01;E9PQZ1;A0A087X1X7;E9PI39;E9PQ49;H0YE72;E9PPR1;E9PL12;E9PMW7;E9PIZ1;H0YCK7;H0YE58;E9PK72;E9PKK3;E9PNW6;E9PJD0;E9PQC9	P29692;E9PRY8;P29692-2;E9PK01;E9PQZ1;A0A087X1X7;E9PI39;E9PQ49;H0YE72	Elongation factor 1-delta	EEF1D			0.149204	0.905414	34	34	1	88.6	31.121	323.31	-0.013355	0.105142	0.322505	0.182524
Q9H0F7;Q9H0F7-2;C9IZ13;H7C5H6	Q9H0F7;Q9H0F7-2;C9IZ13	ADP-ribosylation factor-like protein 6	ARL6			0.149015	0.936433	6	6	6	41.9	21.097	28.367	0.237115	0.0298416	0.0363276	0.292776
P53582;H0Y955;H0Y903;H0YAI3;H0Y9L0;D6RF24	P53582;H0Y955	Methionine aminopeptidase 1	METAP1			0.148773	0.584773	24	24	24	73.1	43.215	323.31	-0.0758749	0.0060466	0.322505	0.342415
Q9NVF7;Q9NVF7-2;B4E0H5	Q9NVF7	F-box only protein 28	FBXO28			0.148639	0.327351	5	5	5	14.1	41.149	8.7157	0.087013	-0.107353	NaN	0.466257
Q9NS00-2;Q9NS00;C9K0C8	Q9NS00-2;Q9NS00	Glycoprotein-N-acetylgalactosamine 3-beta-galactosyltransferase 1	C1GALT1			0.148597	0.175408	4	4	4	14.6	35.934	6.3133	0.27167	-0.418408	NaN	0.592528
P40429;M0QYS1;Q8J015;Q6NVV1;M0QZU1;A0A096LPE0	P40429;M0QYS1;Q8J015	60S ribosomal protein L13a	RPL13A;RPL13a			0.148563	0.860179	12	12	12	44.8	23.577	67.012	0.0467422	0.00834347	0.213752	0.325413
Q5BJH7-4;Q5BJH7-5;Q5BJH7-3;Q5BJH7;K7ERQ0;K7ERY2;Q5BJH7-6;K7EJQ6;Q5BJH7-2;K7EPQ7	Q5BJH7-4;Q5BJH7-5;Q5BJH7-3;Q5BJH7;K7ERQ0;K7ERY2;Q5BJH7-6;K7EJQ6;Q5BJH7-2	Protein YIF1B	YIF1B			0.148345	0.385313	6	6	6	35.4	31.245	23.714	0.339674	-0.160105	-0.0700727	0.483884
Q9BSJ8;Q9BSJ8-2;F8VZB1	Q9BSJ8;Q9BSJ8-2	Extended synaptotagmin-1	ESYT1			0.148309	0.36999	50	50	50	48.7	122.85	323.31	0.0311794	-0.233329	0.275484	0.5199
Q9NQH7-4;Q9NQH7;Q9NQH7-2;Q9NQH7-3;Q9NQH7-5	Q9NQH7-4;Q9NQH7;Q9NQH7-2	Probable Xaa-Pro aminopeptidase 3	XPNPEP3			0.147961	0.291554	10	10	10	34.9	54.671	51.96	0.0619326	-0.347399	0.275484	0.601825
P04062-4;P04062-2;P04062;A0A0G2JNZ5;A0A0G2JLB3;P04062-5;A0A0G2JNZ0;P04062-3	P04062-4;P04062-2;P04062;A0A0G2JNZ5;A0A0G2JLB3;P04062-5;A0A0G2JNZ0	Glucosylceramidase	GBA			0.147935	0.288589	5	5	5	21.4	50.316	10.215	0.351958	-0.443144	0.247685	0.435241
Q9NPB8;H0Y565	Q9NPB8	Glycerophosphocholine phosphodiesterase GPCPD1	GPCPD1			0.147761	0.695089	16	16	16	27.1	76.034	31.665	0.364403	-0.0711787	0.192825	0.104992
P18124;A8MUD9;C9JIJ5;C9JZ88	P18124;A8MUD9	60S ribosomal protein L7	RPL7			0.147634	0.812365	22	22	22	61.3	29.225	170.34	-0.0092038	0.0461418	0.323658	0.22994
P04920-2;P04920-3;P04920;J3KNG9;C9J9M9;C9J459;C9JVC2;C9J722;C9J035	P04920-2;P04920-3;P04920;J3KNG9	Anion exchange protein 2;Anion exchange protein	SLC4A2			0.147582	0.430676	28	28	25	31.6	135.6	161.35	0.0758393	-0.146771	0.132643	0.528615
Q9HA64;I3L139;I3L2G3;I3L3W5;I3L407;I3L378	Q9HA64;I3L139;I3L2G3	Ketosamine-3-kinase	FN3KRP			0.14751	0.361202	9	9	9	30.7	34.412	60.921	-0.13014	-0.135871	0.494876	0.361175
Q8IXI2-4;Q8IXI2;Q8IXI2-5;Q8IXI2-2;Q8IXI2-7;Q8IXI2-3;H7BXZ6;Q8IXI2-6;K7EIQ7;J3KSR5;J3QLG2;K7EP86	Q8IXI2-4;Q8IXI2;Q8IXI2-5;Q8IXI2-2;Q8IXI2-7;Q8IXI2-3;H7BXZ6;Q8IXI2-6	Mitochondrial Rho GTPase 1;Mitochondrial Rho GTPase	RHOT1			0.147334	0.359632	14	14	13	29.8	66.54	39.658	0.0222438	-0.211732	0.211012	0.56781
A0A087WTX2;Q92504;A2AAT0	A0A087WTX2;Q92504;A2AAT0	Zinc transporter SLC39A7	SLC39A7			0.147314	0.477322	2	2	2	9.1	46.393	10.874	0.366336	-0.122931	-0.0197991	0.365648
P48730-2;H7BYT1;P48730;B0QY35;B0QY34;B0QY36;H0Y645;J3QQI9;H0Y2N6;B4DLF1;J3KRM8	P48730-2;H7BYT1;P48730;B0QY35;B0QY34;B0QY36;H0Y645;J3QQI9	Casein kinase I isoform delta	CSNK1D;CSNK1E			0.147202	0.461908	14	14	3	35.9	46.832	57.241	0.154972	-0.221556	0.268434	0.386959
Q8IWV8-4;Q8IWV8;Q8IWV8-3;Q8IWV8-2	Q8IWV8-4;Q8IWV8	E3 ubiquitin-protein ligase UBR2	UBR2			0.146802	0.430328	33	33	33	24.3	200.54	97.276	-0.111565	-0.0773606	0.416515	0.35962
Q9P0J1;Q9P0J1-2;E5RIV4;E5RI96;E5RIE5	Q9P0J1;Q9P0J1-2	[Pyruvate dehydrogenase [acetyl-transferring]]-phosphatase 1, mitochondrial	PDP1			0.146675	0.322226	20	20	20	45.4	61.053	323.31	-0.0938305	-0.21103	0.330214	0.561345
P35573;P35573-2;P35573-3	P35573;P35573-2;P35573-3	Glycogen debranching enzyme;4-alpha-glucanotransferase;Amylo-alpha-1,6-glucosidase	AGL			0.146525	0.960056	71	71	71	58.3	174.76	323.31	0.0481288	0.0206267	0.252779	0.264565
Q9UHQ9;H7C0R7	Q9UHQ9;H7C0R7	NADH-cytochrome b5 reductase 1	CYB5R1			0.146497	0.372667	12	12	12	51.1	34.094	138.92	0.200647	-0.26278	0.138814	0.509307
Q96P11-2;Q96P11;Q96P11-4;Q96P11-5;Q96P11-3;Q63ZY6-5;Q63ZY6;Q63ZY6-4;Q3KNT7-3;Q3KNT7-2;Q3KNT7;Q63ZY6-6;Q63ZY6-2	Q96P11-2;Q96P11;Q96P11-4;Q96P11-5	Probable 28S rRNA (cytosine-C(5))-methyltransferase	NSUN5			0.146412	0.818946	26	26	26	67.8	50.41	187.75	0.134984	-0.0515338	0.183709	0.318488
P12268;H0Y4R1;E7ETK5	P12268;H0Y4R1	Inosine-5-monophosphate dehydrogenase 2	IMPDH2			0.1462	0.392001	35	35	33	70.2	55.804	323.31	-0.0465609	-0.173287	0.353775	0.450873
P15954;D6R9Z7	P15954;D6R9Z7	Cytochrome c oxidase subunit 7C, mitochondrial	COX7C			0.146116	0.547282	2	2	2	41.3	7.2454	10.494	NaN	0.0579701	0.0335111	0.346867
Q5T3I0;Q5T3I0-3;A0A0A0MRK1;E9PAV9;F8W895;E9PPY4;F2Z3C6;Q5T3I0-2	Q5T3I0;Q5T3I0-3;A0A0A0MRK1;E9PAV9;F8W895	G patch domain-containing protein 4	GPATCH4			0.146087	0.40483	22	22	22	47.8	50.381	167.44	-0.0392789	-0.169015	0.413377	0.379263
Q9Y6D5	Q9Y6D5	Brefeldin A-inhibited guanine nucleotide-exchange protein 2	ARFGEF2			0.145888	0.801329	55	55	38	37.8	202.04	323.31	0.0214529	0.0116388	0.220701	0.329758
Q8N122;Q8N122-3;Q8N122-2;I3L436	Q8N122;Q8N122-3	Regulatory-associated protein of mTOR	RPTOR			0.145779	0.573268	25	25	25	25.9	149.04	143.65	0.0249127	-0.0788379	0.237197	0.399844
Q6EEV4-2;Q6EEV4	Q6EEV4-2;Q6EEV4	DNA-directed RNA polymerase II subunit GRINL1A, isoforms 4/5	POLR2M			0.145769	0.183027	2	2	2	37.2	8.8268	36.043	-0.196985	0.294312	0.910886	-0.425137
Q4ADV7-2;Q4ADV7-3;Q4ADV7;H0YFN7;H0YGC4	Q4ADV7-2;Q4ADV7-3;Q4ADV7;H0YFN7	RAB6A-GEF complex partner protein 1	RIC1			0.145615	0.807915	11	11	11	10.8	131.17	22.92	0.0936943	-0.0305013	0.336283	0.182983
Q96BP2;A6NJX6	Q96BP2;A6NJX6	Coiled-coil-helix-coiled-coil-helix domain-containing protein 1	CHCHD1			0.145385	0.712388	3	3	3	32.2	13.475	15.436	-0.0246034	0.159242	0.381394	0.0655062
D3VVH9;A0A087X1A8;G3V3R7;F5H211;P54252-4;P54252-2;P54252;G3V328;A0A087WXY4;C9JQV6;P54252-3;G3V3T6;G3V4F5;G3V4F4;G3V5H3;S4R399;G3V4U9;A0A0A0MS38;G3V3T0;E9PJN5;G3V2G1;G3V2G2;G3V526;P54252-5;G3V3A6;D3VVP3;D6R9I5;G3V4B1;G3V390;G3V3S5;Q9H3M9	D3VVH9;A0A087X1A8;G3V3R7;F5H211;P54252-4;P54252-2;P54252;G3V328;A0A087WXY4;C9JQV6;P54252-3;G3V3T6;G3V4F5;G3V4F4;G3V5H3;S4R399;G3V4U9;A0A0A0MS38;G3V3T0;E9PJN5;G3V2G1	Ataxin-3	ATXN3			0.145302	0.514963	10	10	10	36.5	34.793	69.731	-0.140648	0.0553346	0.389126	0.277394
Q9Y2S6	Q9Y2S6	Translation machinery-associated protein 7	TMA7			0.145247	0.589987	2	2	2	15.6	7.0662	4.5595	-0.0777899	0.156914	0.420725	0.0811406
Q9H6A0-2;Q9H6A0	Q9H6A0-2;Q9H6A0	DENN domain-containing protein 2D	DENND2D			0.145065	0.26311	9	9	9	23.3	53.148	21.694	-0.229219	-0.220295	0.513592	0.516182
P42696;A2A2V2;P42696-2;Q5TCT4;H7C5M1	P42696;A2A2V2	RNA-binding protein 34	RBM34			0.144896	0.50857	17	17	17	41.4	48.564	59.958	0.144792	-0.161201	0.177471	0.418523
Q96FJ2	Q96FJ2	Dynein light chain 2, cytoplasmic	DYNLL2			0.144673	0.282936	6	3	3	59.6	10.35	62.815	-0.239154	-0.061255	0.679514	0.199587
A0A087X2B5;P35613-2;P35613;P35613-4;I3L192;A0A087WUV8;P35613-3;R4GMX5;R4GN83	A0A087X2B5;P35613-2;P35613;P35613-4;I3L192;A0A087WUV8;P35613-3	Basigin	BSG			0.144518	0.710536	7	7	7	46.2	23.896	77.216	-0.0295589	0.0214797	0.271187	0.314966
Q8N766;Q8N766-3;Q8N766-2;Q8N766-4;Q5TG59;H7C5A2;H7C4E3	Q8N766;Q8N766-3;Q8N766-2;Q8N766-4	ER membrane protein complex subunit 1	EMC1			0.144495	0.624424	34	34	34	47.9	111.76	323.31	0.162186	-0.115566	0.169925	0.361435
Q15125;C9J719;C9JJ78	Q15125;C9J719;C9JJ78	3-beta-hydroxysteroid-Delta(8),Delta(7)-isomerase	EBP			0.144414	0.593958	3	3	3	16.5	26.352	82.855	0.195286	-0.158993	0.258941	0.282421
G3XA86;Q9Y2Z9-3;Q9Y2Z9;A0A0D9SFJ1;Q9Y2Z9-2;G3V434;G3V3A1;G3V2L5;G3V4A6	G3XA86;Q9Y2Z9-3;Q9Y2Z9;A0A0D9SFJ1;Q9Y2Z9-2	Ubiquinone biosynthesis monooxygenase COQ6, mitochondrial	COQ6			0.144262	0.856427	12	12	12	31.5	50.705	42.622	0.174426	0.331132	-0.00288824	0.0743803
Q9BYD2;Q5SZR1	Q9BYD2;Q5SZR1	39S ribosomal protein L9, mitochondrial	MRPL9			0.144018	0.477989	17	17	17	50.2	30.243	206.78	0.0684531	-0.173108	0.29537	0.385356
Q9NR30;Q9NR30-2	Q9NR30;Q9NR30-2	Nucleolar RNA helicase 2	DDX21			0.143976	0.671221	61	61	59	63.2	87.343	323.31	0.108456	-0.0897892	0.215244	0.341994
O75419-2;O75419;O75419-3	O75419-2;O75419;O75419-3	Cell division control protein 45 homolog	CDC45			0.143929	0.451527	7	7	7	21.9	60.244	27.657	-0.226509	0.144438	0.299831	0.357955
P61006;P61006-2;H0YLJ8;H0YL94;P20337;Q96E17	P61006;P61006-2	Ras-related protein Rab-8A	RAB8A			0.14392	0.806785	16	13	10	65.7	23.668	123.75	0.0339386	-0.00433462	0.237074	0.309002
H3BNR1;Q02080	H3BNR1;Q02080	Myocyte-specific enhancer factor 2B	MEF2BNB-MEF2B;MEF2B			0.143824	1.10122	16	2	2	44.5	40.458	14.369	0.011588	0.130931	0.152897	0.279879
P02794;G3V192;G3V1D1;E9PRK8;E9PKY7;E9PPQ4;E9PQR3;E9PKM5;E9PK45	P02794;G3V192;G3V1D1;E9PRK8;E9PKY7	Ferritin heavy chain;Ferritin heavy chain, N-terminally processed;Ferritin	FTH1			0.143692	0.199731	6	6	6	39.3	21.225	79.306	-0.423524	-0.208044	0.659651	0.546688
P46977;P46977-2;A0A0C4DH80;E9PN73;E9PI32;H0YET6	P46977;P46977-2	Dolichyl-diphosphooligosaccharide--protein glycosyltransferase subunit STT3A	STT3A			0.143672	0.734873	21	21	20	24.5	80.529	156.1	0.352271	0.157303	-0.0553215	0.120435
Q99747;Q99747-2;J3KTJ6;J3QS28;J3QKW4	Q99747;Q99747-2	Gamma-soluble NSF attachment protein	NAPG			0.143649	1.25532	20	20	20	52.6	34.746	93.492	0.0228446	0.184725	0.243547	0.123481
Q709C8-3;Q709C8;Q709C8-4;Q709C8-2	Q709C8-3;Q709C8;Q709C8-4;Q709C8-2	Vacuolar protein sorting-associated protein 13C	VPS13C			0.143613	0.734785	132	132	132	43.8	417.27	323.31	0.0147036	-0.0159722	0.281194	0.294526
P46781;B5MCT8;C9JM19;F2Z3C0;A8MXK4	P46781;B5MCT8;C9JM19	40S ribosomal protein S9	RPS9			0.143261	0.7143	21	21	21	50.5	22.591	81.237	0.0548568	-0.0547818	0.288299	0.284669
Q8MH48;Q5RJ85;A0A0G2JPQ3;P17693	Q8MH48;Q5RJ85;A0A0G2JPQ3;P17693	HLA class I histocompatibility antigen, alpha chain G	HLA-G			0.143173	0.471206	2	1	1	6.8	38.254	2.9725	-0.092072	0.0446039	0.496207	0.123953
Q9C0E8-2;Q9C0E8;Q9C0E8-4;Q9C0E8-3;C9JM95;C9JL94	Q9C0E8-2;Q9C0E8;Q9C0E8-4;Q9C0E8-3	Protein lunapark	LNP			0.143166	0.660128	8	8	8	22.7	47.094	17.482	0.164658	-0.103008	0.166201	0.344813
Q12800;Q12800-3;F8VWL0;F8VX55;Q9NZI6;C9JWL3	Q12800;Q12800-3;F8VWL0;F8VX55	Alpha-globin transcription factor CP2	TFCP2		+	0.143113	2.44181	17	17	1	47	57.255	178.35	0.126202	0.110631	0.145743	0.189878
P05198;G3V4T5;H0YJS4	P05198;G3V4T5;H0YJS4	Eukaryotic translation initiation factor 2 subunit 1	EIF2S1			0.143002	1.26529	36	36	36	80	36.112	323.31	0.0409718	0.0950467	0.249385	0.186607
P04406-2	P04406-2	Glyceraldehyde-3-phosphate dehydrogenase	GAPDH			0.142893	0.35996	31	1	1	91.5	31.548	3.6848	-0.191689	-0.0243405	0.534858	0.252742
A0A0A0MSA7;O43432;O43432-3;O43432-4;O43432-2	A0A0A0MSA7;O43432;O43432-3;O43432-4	Eukaryotic translation initiation factor 4 gamma 3	EIF4G3			0.14285	0.506131	35	35	29	24.5	180.5	169	-0.0103502	0.0321009	0.0560286	0.493621
Q13546;Q13546-2	Q13546;Q13546-2	Receptor-interacting serine/threonine-protein kinase 1	RIPK1			0.142422	0.313283	21	21	21	40.7	75.93	89.786	-0.0366088	-0.269095	0.515309	0.360082
Q5D1E8;E9PP00;Q9C0D7;Q9C0D7-2	Q5D1E8	Ribonuclease ZC3H12A	ZC3H12A			0.142381	0.212072	3	3	3	7.2	65.698	9.3076	-0.309875	0.509645	NaN	0.227371
P18669;P15259;Q8N0Y7	P18669	Phosphoglycerate mutase 1	PGAM1			0.1419	0.69407	20	20	20	73.2	28.804	323.31	0.0252945	-0.0363335	0.25411	0.324527
P45985;P45985-2;R4GN37	P45985;P45985-2	Dual specificity mitogen-activated protein kinase kinase 4	MAP2K4			0.141884	0.616954	20	19	19	55.6	44.287	73.77	0.260567	-0.0436161	-0.00264252	0.353229
P46777;Q5T7N0;R4GNJ2	P46777	60S ribosomal protein L5	RPL5			0.141729	0.932149	23	23	23	70.4	34.362	143.07	0.0246487	0.0344974	0.244644	0.263127
Q9NY97-2;Q9NY97	Q9NY97-2;Q9NY97	N-acetyllactosaminide beta-1,3-N-acetylglucosaminyltransferase 2	B3GNT2			0.141477	0.428666	4	4	4	14.8	45.484	4.5484	0.318884	-0.176185	0.014641	0.40857
C9JC87;O00189;C9IZL5;C9JWL4;C9JMG3;H7C0A0;H7BZV3;H0Y6K1;F8WCR6;F8WDR3;F8WCC5	C9JC87;O00189;C9IZL5;C9JWL4;C9JMG3;H7C0A0	AP-4 complex subunit mu-1	AP4M1			0.141454	0.818335	8	8	8	21.7	50.69	17.419	-0.0287106	0.0643311	0.276318	0.253877
Q9Y673;Q9Y673-2	Q9Y673;Q9Y673-2	Dolichyl-phosphate beta-glucosyltransferase	ALG5			0.141002	0.368695	9	9	9	31.8	36.946	81.11	0.179727	-0.153527	-0.0176945	0.555503
E9PJN1;O75676-2;O75676;A0A0A6YYC0	E9PJN1;O75676-2;O75676;A0A0A6YYC0	Ribosomal protein S6 kinase;Ribosomal protein S6 kinase alpha-4	RPS6KA4			0.140869	0.250859	6	5	5	8.6	84.755	4.9081	-0.0654344	-0.0608185	NaN	0.54886
O14828;O14828-2	O14828;O14828-2	Secretory carrier-associated membrane protein 3	SCAMP3			0.140556	0.798092	10	10	10	41.8	38.287	190.66	0.0995408	-0.0541676	0.278936	0.237915
A0A0A0MS52;A0A0A0MT11;Q13555-4;Q13555-2;Q13555-8;Q13555;Q13555-6;Q8WU40;Q5SWX3;Q13555-10;Q13555-3;Q13555-5;Q13555-7;Q13555-9;H0Y6G2;H7BXS4;H7C394;D6RHX9;E9PBE8;E7EQE4	A0A0A0MS52;A0A0A0MT11;Q13555-4;Q13555-2;Q13555-8;Q13555;Q13555-6;Q8WU40;Q5SWX3;Q13555-10;Q13555-3;Q13555-5;Q13555-7;Q13555-9;H0Y6G2	Calcium/calmodulin-dependent protein kinase type II subunit gamma	CAMK2G			0.140504	0.704583	16	13	8	45.3	60.201	77.761	0.0559963	-0.00304731	0.125651	0.383416
P26373;P26373-2;J3QSB4;J3KS98;H3BUK8;H3BTH3	P26373;P26373-2;J3QSB4	60S ribosomal protein L13	RPL13			0.140088	0.775654	13	13	13	53.1	24.261	62.248	0.00657913	0.0106367	0.307312	0.235824
Q9ULW3	Q9ULW3	Activator of basal transcription 1	ABT1			0.139968	0.579531	12	12	12	46	31.079	52.605	0.033348	-0.0335843	0.131853	0.428255
O14976;O14976-2;A0A087X1U9;D6RAW3;H0Y8H5;D6RC24;D6RE78;D6RF16;D6RAQ7	O14976;O14976-2	Cyclin-G-associated kinase	GAK			0.139858	0.475132	33	33	33	32.3	143.19	251.83	-0.0311129	-0.104403	0.305212	0.389734
Q9UPM8;Q9UPM8-2;H0YK95;H0YL95;H0YK94	Q9UPM8;Q9UPM8-2	AP-4 complex subunit epsilon-1	AP4E1			0.139839	0.382388	18	18	18	21.8	127.29	43.301	-0.0794293	-0.147298	0.346758	0.439324
Q13217;X6R9L0	Q13217;X6R9L0	DnaJ homolog subfamily C member 3	DNAJC3			0.139767	1.11024	27	27	27	53.8	57.579	150.38	0.212818	0.0253123	0.0758749	0.245061
Q92934;F5H3B1;F5H1R6;F5GYS3;A8MXU7	Q92934	Bcl2-associated agonist of cell death	BAD			0.139601	0.349542	3	3	3	20.8	18.392	12.593	0.242943	NaN	-0.153735	0.329595
Q7Z2T5;Q7Z2T5-2;X6RK96	Q7Z2T5	TRMT1-like protein	TRMT1L			0.139553	0.622739	31	31	31	55	81.746	173.39	-0.0600475	0.0143553	0.292899	0.311005
P42684-7;P42684-5;P42684-6;P42684;P42684-4;P42684-10;P42684-2;P42684-3;P42684-8	P42684-7;P42684-5;P42684-6;P42684;P42684-4;P42684-10;P42684-2;P42684-3;P42684-8	Abelson tyrosine-protein kinase 2	ABL2			0.1395	1.28113	8	8	7	9	115.82	20.125	0.0265871	0.141171	0.245131	0.145111
O43291;K7EKQ0;K7EM91;O43291-2;K7ESI5;K7EQZ3	O43291;K7EKQ0;K7EM91;O43291-2	Kunitz-type protease inhibitor 2	SPINT2			0.13943	0.625937	3	3	3	13.5	28.228	9.579	0.125242	-0.120812	0.305095	0.248194
Q01433-2;Q01433;H0Y360;Q01433-5;Q01433-3;Q01433-4;H0YCL9;E9PJF6;E9PIJ1;H0YF16	Q01433-2;Q01433;H0Y360;Q01433-5;Q01433-3;Q01433-4	AMP deaminase 2	AMPD2			0.139275	0.702192	34	34	34	38.8	92.07	104.74	-0.0628125	0.0635029	0.298658	0.257752
P62906	P62906	60S ribosomal protein L10a	RPL10A			0.139245	0.740402	18	18	18	53.9	24.831	189.83	0.00309065	-0.00294614	0.286053	0.270782
Q99735-2;Q99735	Q99735-2;Q99735	Microsomal glutathione S-transferase 2	MGST2			0.138947	0.152178	1	1	1	18.2	8.3587	4.2936	0.378607	-0.490193	NaN	0.528428
Q8NEC7;Q8NEC7-3;D6R9W2;D6RCC4;D6RCC9	Q8NEC7;Q8NEC7-3	Glutathione S-transferase C-terminal domain-containing protein	GSTCD			0.138944	0.674558	15	15	15	28.1	71.078	34.422	-0.0270125	0.00662125	0.326192	0.249977
P42566;B1AUU8;P42566-2;S4R3U1	P42566;B1AUU8;P42566-2	Epidermal growth factor receptor substrate 15	EPS15			0.13893	0.678898	44	44	44	67	98.655	323.31	-0.0394191	0.0250288	0.328722	0.24139
Q5JTH9;Q5JTH9-2;Q5JTH9-3;A0A087X1U8;A0A087WYW2;H7C1M8;A0A087X0G0	Q5JTH9;Q5JTH9-2;Q5JTH9-3	RRP12-like protein	RRP12			0.138838	0.381825	54	54	53	55.1	143.7	323.31	0.0412242	-0.20538	0.228726	0.490781
P19784;H3BSA1;H3BV19;H3BNI9	P19784;H3BSA1	Casein kinase II subunit alpha	CSNK2A2			0.138707	0.75426	28	28	28	76	41.213	211.76	0.00359683	0.00129788	0.276675	0.273256
O95243-5;O95243-2;O95243;O95243-3;O95243-6;D6RBI7	O95243-5;O95243-2;O95243;O95243-3;O95243-6	Methyl-CpG-binding domain protein 4	MBD4			0.138685	0.388946	16	16	16	29.9	64.767	33.839	0.115457	-0.262002	0.357608	0.343678
E7EX17;P23588;P23588-2;F8VX11;F8VP89;F8VSC7;F8W0K0;F8VYE9;F8VRU1;REV__F8VX11;REV__P23588-2;REV__P23588;REV__E7EX17	E7EX17;P23588;P23588-2;F8VX11	Eukaryotic translation initiation factor 4B	EIF4B		+	0.138622	1.42196	45	45	45	65.9	69.697	323.31	0.0478305	0.131721	0.238175	0.136759
P78356;P78356-2;A0A087WT35	P78356;P78356-2	Phosphatidylinositol 5-phosphate 4-kinase type-2 beta	PIP4K2B			0.138525	0.708898	10	5	5	26.2	47.377	17.902	-0.0164963	0.0048968	0.280838	0.284862
Q9Y285;K7ER00;Q9Y285-2;K7ER16;K7EPH2;K7EK06;K7ERS0	Q9Y285;K7ER00;Q9Y285-2;K7ER16;K7EPH2	Phenylalanine--tRNA ligase alpha subunit	FARSA			0.138472	0.997575	29	29	29	62.4	57.563	323.31	0.028175	0.0699771	0.294665	0.161072
H3BN98;H3BPJ2;Q15041;H3BTX6;H3BS91;Q15041-3;Q15041-2	H3BN98					0.138322	0.761664	8	2	2	39.7	27.168	3.5776	-0.00633399	0.0203421	0.23008	0.309199
Q13601;Q13601-2;A0A087WZC7	Q13601;Q13601-2;A0A087WZC7	KRR1 small subunit processome component homolog	KRR1			0.138261	0.604976	11	11	11	26.8	43.664	27.677	0.231769	-0.140825	0.165944	0.296155
A0A0A6YYH9;Q5JTY5-2;Q5RIA9;Q5JTY5;Q5RIB0;A0A0A0MRU4;Q4V339;A0A0B4J2F1;H0Y5V3;A6NM15;Q5RIB3;H0Y857;A0A087WU37;Q5RIB5;A0A087X1C0;Q5RIA9-2;A0A087WVU7;A0A087WU66	A0A0A6YYH9;Q5JTY5-2;Q5RIA9;Q5JTY5;Q5RIB0;A0A0A0MRU4;Q4V339;A0A0B4J2F1;H0Y5V3;A6NM15	COBW domain-containing protein 3;COBW domain-containing protein 5;COBW domain-containing protein 6;Putative COBW domain-containing protein 7	CBWD5;CBWD3;CBWD6;CBWD7			0.138109	0.403631	17	2	1	61.3	41.896	57.41	-0.0847446	-0.116004	0.427284	0.325901
Q6PJW8;Q6PJW8-2;Q6PJW8-3;B1AQM9	Q6PJW8;Q6PJW8-2	Consortin	CNST			0.138009	0.434464	7	7	7	15	79.596	14.126	0.0555462	-0.094911	0.0795658	0.511835
Q9UGR2-2;Q9UGR2	Q9UGR2-2;Q9UGR2	Zinc finger CCCH domain-containing protein 7B	ZC3H7B			0.137871	0.960082	25	25	24	31.3	109.86	60.054	0.0276897	0.0531114	0.177854	0.292829
Q99996-2;A0A0A0MRF6;Q99996-5;Q99996-3;Q99996;Q99996-6;A0A0A0MRE9;A0A087WX84;Q99996-4;H7BYL6;H7BZV6;Q6PJH3;H0Y6Q0	Q99996-2;A0A0A0MRF6;Q99996-5;Q99996-3;Q99996;Q99996-6;A0A0A0MRE9	A-kinase anchor protein 9	AKAP9			0.137756	0.629809	104	104	104	32.4	452.98	323.31	-0.0536674	0.0160683	0.332851	0.25577
Q5HYI8;C9JXM3;F8WF50;F8WDC7;H7C533;F8WAX9	Q5HYI8;C9JXM3	Rab-like protein 3	RABL3			0.137474	0.689943	8	8	8	46.2	26.422	46.058	0.293465	-0.0937713	0.23008	0.120122
B1AKJ5;O43847;O43847-2;A0A087WYK8;G3V1R5;F5H7V1;H0Y5G9	B1AKJ5;O43847;O43847-2;A0A087WYK8;G3V1R5;F5H7V1	Nardilysin	NRD1			0.13738	0.599574	38	38	38	36.9	139.41	226.15	-0.0723115	0.0422241	0.37128	0.208327
P61927	P61927	60S ribosomal protein L37	RPL37			0.137316	0.577361	1	1	1	10.3	11.078	2.3542	-0.0738202	0.00647761	0.290307	0.326299
Q70CQ2;Q70CQ2-3;Q70CQ2-2;A0A0C4DG73;H7C183;H7C150	Q70CQ2;Q70CQ2-3;Q70CQ2-2	Ubiquitin carboxyl-terminal hydrolase 34	USP34			0.137242	0.497692	73	73	73	26.7	404.23	225.93	-0.0716254	-0.0506219	0.317767	0.35345
P09661;H0YKK0;H0YMA0;H0YLR3	P09661;H0YKK0	U2 small nuclear ribonucleoprotein A	SNRPA1			0.137196	0.647575	22	22	22	59.6	28.415	323.31	-0.0344974	-0.000649381	0.314174	0.269756
O60830-2;O60830;V9GYU0;V9GYS0;V9GYK7	O60830-2;O60830;V9GYU0;V9GYS0	Mitochondrial import inner membrane translocase subunit Tim17-B	TIMM17B			0.137114	0.427103	6	6	5	41.9	23.823	25.036	0.496082	-0.135887	0.113167	0.0750944
Q8N3C0;Q8N3C0-4;E5RFZ0;Q8N3C0-3;J3KNJ4	Q8N3C0	Activating signal cointegrator 1 complex subunit 3	ASCC3			0.13644	0.991887	76	76	76	42.1	251.46	323.31	0.0150534	0.0610158	0.209765	0.259927
Q8N9F7;J3QQN7;Q8N9F7-3;Q8N9F7-2;J3KTA9;J3QRR6	Q8N9F7;J3QQN7;Q8N9F7-3;Q8N9F7-2	Glycerophosphodiester phosphodiesterase domain-containing protein 1	GDPD1			0.136219	0.138308	7	7	7	30.6	36.167	17.189	-0.488824	-0.462972	0.845992	0.65068
J3KQ48;Q9Y3E5	J3KQ48;Q9Y3E5	Peptidyl-tRNA hydrolase 2, mitochondrial	PTRH2			0.136006	0.303665	8	8	8	60.6	19.325	281.89	-0.00561566	-0.26609	0.259423	0.556308
Q8IVF4;A0A087WV07;Q8IVF4-2	Q8IVF4	Dynein heavy chain 10, axonemal	DNAH10			0.135905	0.410467	4	4	4	1.3	514.83	2.0512	NaN	-0.103627	0.197488	0.313854
Q96FZ2;E7EMP6;D6R9T3;D6RAZ3;D6RGK7;D6RAI0	Q96FZ2;E7EMP6;D6R9T3;D6RAZ3	Embryonic stem cell-specific 5-hydroxymethylcytosine-binding protein	HMCES			0.135883	0.606201	18	18	18	55.4	40.574	151.38	0.38594	0.0863761	-0.0716334	0.142847
Q9NXH9-2;Q9NXH9;K7EQQ8;K7EMZ2;K7EQU7;K7EJX9;K7EQY6;K7ENI9	Q9NXH9-2;Q9NXH9;K7EQQ8	tRNA (guanine(26)-N(2))-dimethyltransferase	TRMT1		+	0.13578	1.38541	19	19	19	36.2	69.305	141.93	0.170962	0.157432	0.19497	0.0197553
O00479	O00479	High mobility group nucleosome-binding domain-containing protein 4	HMGN4			0.1357	0.371783	4	3	3	33.3	9.5388	5.0293	0.386525	-0.0829273	NaN	0.103503
Q9Y678;H0Y8X7;D6RG17;H0Y8G2	Q9Y678	Coatomer subunit gamma-1	COPG1		+	0.135648	2.00618	62	62	56	84.8	97.717	323.31	0.193453	0.0992279	0.097476	0.152436
R9WNI0	R9WNI0		FMR1			0.135596	0.368004	16	14	1	29.6	61.515	65.675	-0.190299	-0.0262786	0.297954	0.461005
Q92619;K7ES98;K7EM85;Q92619-2;F5H1R4;K7ES92;K7EQA4;A0A087X1A3	Q92619;K7ES98;K7EM85;Q92619-2;F5H1R4;K7ES92	Minor histocompatibility protein HA-1;Minor histocompatibility antigen HA-1	HMHA1			0.135575	0.726663	33	33	33	35.8	124.61	323.31	0.000808092	-0.0058403	0.273098	0.274233
A0A024R644;O75503;A0A087WZY0	A0A024R644;O75503;A0A087WZY0	Ceroid-lipofuscinosis neuronal protein 5	CLN5			0.13535	0.215292	4	4	4	15	46.339	4.748	0.201261	-0.546709	0.542109	0.34474
Q15554;H3BR06;Q15554-4;U3KQ35;H3BTA7;J3KSZ6;J3KSJ9;H3BR37;V9GYM1	Q15554;H3BR06;Q15554-4	Telomeric repeat-binding factor 2	TERF2			0.135225	0.839095	21	21	21	41.5	59.593	276.69	0.0690734	-0.0173878	0.192068	0.297148
Q8ND04;Q8ND04-2;Q8ND04-3;J3KTD7;J3QKP6;J3QRE1	Q8ND04;Q8ND04-2;Q8ND04-3	Protein SMG8	SMG8			0.134872	0.436863	17	17	17	23	109.68	45.656	0.0691341	-0.169047	0.201132	0.438268
Q9NVU7;E7EW05;Q9NVU7-2;F8W8T7;D6RC74;D6RIR5	Q9NVU7;E7EW05;Q9NVU7-2	Protein SDA1 homolog	SDAD1			0.134798	0.540731	21	21	21	34.5	79.87	174.64	0.0350617	-0.099649	0.229219	0.374561
Q9Y6Y8;Q9Y6Y8-2;A0A0C4DH82;H7C0V8;H7C4C4;REV__H7BYP9;REV__O15068-5;REV__O15068-4;REV__O15068-3;REV__O15068-2;REV__O15068-6;REV__O15068-8;REV__O15068-10;REV__O15068-9;REV__O15068	Q9Y6Y8;Q9Y6Y8-2	SEC23-interacting protein	SEC23IP			0.13478	0.919007	40	40	40	46.4	111.08	323.31	0.040126	0.015212	0.220949	0.262832
Q5VZE5;Q5VZE5-2	Q5VZE5	N-alpha-acetyltransferase 35, NatC auxiliary subunit	NAA35			0.134738	0.919696	21	21	21	36.4	83.638	77.826	-0.0220482	0.108223	0.275842	0.176935
Q5SVZ6;Q5SVZ7	Q5SVZ6	Zinc finger MYM-type protein 1	ZMYM1			0.134639	0.194117	6	6	6	6.5	128.72	12.465	-0.113567	0.168899	0.842295	-0.359071
A0A0A0MTQ5;G3V556;P56378;P56378-2	A0A0A0MTQ5;G3V556;P56378;P56378-2	6.8 kDa mitochondrial proteolipid	C14orf2;MP68		+	0.134346	1.49333	3	3	3	24.7	9.1078	2.0029	0.0548717	0.104337	0.158854	0.21932
Q14692	Q14692	Ribosome biogenesis protein BMS1 homolog	BMS1			0.134297	0.428984	34	34	34	32.2	145.81	116.91	-0.0374525	-0.100221	0.213378	0.461482
J3QL71;Q96FV2;Q96FV2-2;J3QQM9;J3QRJ1;J3KT79;J3QR84;J3KS57	J3QL71;Q96FV2;Q96FV2-2	Secernin-2	SCRN2			0.134226	0.380892	10	10	10	36.7	47.493	54.294	-0.0803848	-0.127526	0.282973	0.461839
Q9BSC4;Q9BSC4-4;Q9BSC4-2;H7C1Z3;Q9BSC4-3	Q9BSC4;Q9BSC4-4;Q9BSC4-2	Nucleolar protein 10	NOL10			0.133881	0.831889	33	33	33	59.2	80.301	260.99	0.0186296	0.0137839	0.223546	0.279564
Q96AQ8;U3KQP8	Q96AQ8;U3KQP8	Mitochondrial calcium uniporter regulator 1	MCUR1		+	0.133805	1.58611	10	10	10	27.9	39.694	40.03	0.0552465	0.179893	0.106214	0.193866
J3QS48;I3L295;J3KT75;J3QW43;J3QRD5;Q9H3L2;Q1HDL3;A0A087WV81;O75352-2;O75352;J3KSI4;I3L1D2;I3L4E0;J3KTK8;J3QQZ4;I3L405;I3L261	J3QS48;I3L295;J3KT75;J3QW43;J3QRD5;Q9H3L2;Q1HDL3;A0A087WV81;O75352-2;O75352;J3KSI4;I3L1D2;I3L4E0;J3KTK8;J3QQZ4	Mannose-P-dolichol utilization defect 1 protein	MPDU1;HBEBP2BPA			0.133787	0.579968	5	5	5	33.7	10.978	8.5269	0.230262	-0.0938482	0.051024	0.347711
O75530-3;O75530;E9PJK2;H0YEL4;E9PMU3	O75530-3;O75530;E9PJK2	Polycomb protein EED	EED			0.133776	0.545055	20	20	1	57.8	45.524	95.492	-0.0614305	-0.0269251	0.301822	0.32164
P39880-3;P39880;P39880-2;P39880-4;P39880-5;P39880-6	P39880-3;P39880;P39880-2;P39880-4;P39880-5;P39880-6	Homeobox protein cut-like 1	CUX1			0.133768	0.597163	57	57	25	43.4	165.69	323.31	-0.0619835	0.00662125	0.318693	0.27174
Q9NUQ3;Q9NUQ3-2;Q9BZA5	Q9NUQ3;Q9NUQ3-2	Gamma-taxilin	TXLNG			0.133554	0.538418	22	22	22	50.2	60.585	172.24	-0.0361869	-0.0396811	0.383386	0.226696
P62987;M0R2S1;M0R1M6	P62987;M0R2S1;M0R1M6	Ubiquitin-60S ribosomal protein L40;Ubiquitin;60S ribosomal protein L40	UBA52			0.133447	0.618035	6	1	1	46.1	14.728	3.4687	0.281176	0.116897	NaN	0.00226684
Q8NBN7;Q8NBN7-2;G8JLA1;K7EMY5	Q8NBN7;Q8NBN7-2;G8JLA1	Retinol dehydrogenase 13	RDH13			0.133029	0.445679	15	15	15	50.5	35.932	68.57	0.00995997	-0.104682	0.164143	0.462694
Q01650;A0A0C4DGL4;H0YJ95;G3V4Z6;Q9UM01	Q01650	Large neutral amino acids transporter small subunit 1	SLC7A5			0.133007	0.610212	7	7	6	10.8	55.01	30.513	0.040126	-0.0788988	0.251325	0.319478
Q93084-2;Q93084-4;Q93084-3;Q93084-7;Q93084;Q93084-6;Q93084-5	Q93084-2;Q93084-4;Q93084-3;Q93084-7;Q93084;Q93084-6;Q93084-5	Sarcoplasmic/endoplasmic reticulum calcium ATPase 3	ATP2A3			0.132941	0.506043	41	33	30	46.2	109.25	323.31	0.330737	-0.0550067	-0.058518	0.314553
Q9BZF2;J3QLK7;Q9BZF2-2	Q9BZF2	Oxysterol-binding protein-related protein 7	OSBPL7			0.132885	0.275593	9	9	9	14.6	95.43	20.296	-0.212632	-0.142752	0.311503	0.575422
E9PL24;A0A0C4DFQ0;Q5VU43-2;E9PQG4;A0A0A0MRL8;A0A0A0MRL9;A0A087WVF8;A0A0A0MRM0;A0A0A0MRM1;A0A087WX83;A0A075B749;Q5VU43-6;Q5VU43-7;Q5VU43-3;Q5VU43;Q5VU43-4;H0YCH7;H0YEW6	E9PL24;A0A0C4DFQ0;Q5VU43-2;E9PQG4;A0A0A0MRL8;A0A0A0MRL9;A0A087WVF8;A0A0A0MRM0;A0A0A0MRM1;A0A087WX83;A0A075B749;Q5VU43-6;Q5VU43-7;Q5VU43-3;Q5VU43;Q5VU43-4	Myomegalin	PDE4DIP			0.13281	0.613856	21	21	21	24.8	126.95	71.12	-0.0494913	0.000865329	0.269273	0.310594
A0A0D9SFB3;A0A0D9SG12;A0A0D9SF53;O00571;O00571-2;O15523-3;B4DLA0;A0A087WVZ1;C9J081;C9J8G5;A0A087WX09;D6RCM4;Q9NQI0-3;Q9NQI0-2;Q9NQI0-4;Q9NQI0;H0Y960	A0A0D9SFB3;A0A0D9SG12;A0A0D9SF53;O00571;O00571-2	ATP-dependent RNA helicase DDX3X	DDX3X			0.132482	0.656876	58	57	20	75	70.839	323.31	-0.00877375	-0.0225955	0.296076	0.265223
X6RK58;Q8TCA0;Q8TCA0-3;A0A0A0MS58;Q8TCA0-2	X6RK58;Q8TCA0;Q8TCA0-3;A0A0A0MS58;Q8TCA0-2	Leucine-rich repeat-containing protein 20	LRRC20			0.132389	0.109469	5	5	5	31.4	19.62	7.352	-0.656268	-0.544771	0.722291	1.00831
Q13464;J3KRH6;C9JFJ0	Q13464	Rho-associated protein kinase 1	ROCK1			0.132378	1.17976	58	58	50	42.4	158.17	190.73	0.0249863	0.10044	0.246591	0.157496
Q9NZE8;D3YTC1;Q9NZE8-2;S4R348	Q9NZE8;D3YTC1;Q9NZE8-2	39S ribosomal protein L35, mitochondrial	MRPL35			0.132338	0.271798	3	3	3	18.6	21.514	2.1921	0.0015879	-0.0891752	0.484602	NaN
D6RFI3;E7EQR8;Q9GZM5;D6RGY8;H0Y9A1;D6RBQ1;D6RA04;D6RAY4	D6RFI3;E7EQR8;Q9GZM5;D6RGY8	Protein YIPF3;Protein YIPF3, 36 kDa form III	YIPF3			0.132241	0.630552	6	6	6	31.7	28.797	38.847	0.15149	-0.0768432	0.098689	0.355627
P61353;K7ELC7;K7EQQ9;K7ERY7	P61353;K7ELC7;K7EQQ9	60S ribosomal protein L27	RPL27			0.132197	0.845516	7	7	7	44.9	15.798	139.76	0.0935557	-0.0322264	0.18574	0.281719
Q5SZE3;H0YKH6;Q5SZE4;Q5SZE1;Q96G23;Q5SZE2;H0YNU7	Q5SZE3;H0YKH6;Q5SZE4;Q5SZE1;Q96G23;Q5SZE2;H0YNU7	Ceramide synthase 2	CERS2			0.13211	0.238449	5	5	5	25.5	23.253	35.786	0.485317	-0.408129	-0.00426226	0.455515
P17568;M0R3B8	P17568	NADH dehydrogenase [ubiquinone] 1 beta subcomplex subunit 7	NDUFB7			0.132108	0.336115	7	7	7	59.9	16.402	73.745	-0.0589399	-0.202838	0.457437	0.332771
A0A0D9SFK2;Q92614-4;Q92614;Q92614-3;Q92614-2;Q92614-5;H0YEV9	A0A0D9SFK2;Q92614-4;Q92614;Q92614-3;Q92614-2;Q92614-5	Unconventional myosin-XVIIIa	MYO18A			0.132027	0.490601	94	94	94	54.8	231.1	323.31	-0.0335111	-0.087902	0.335597	0.313925
P36578;H3BM89;H3BTP7;H3BU31	P36578;H3BM89	60S ribosomal protein L4	RPL4			0.131917	1.02342	31	31	31	51.1	47.697	323.31	0.0377693	0.038998	0.204642	0.246259
Q6XQN6;Q6XQN6-3;C9J8U2;G5E977;Q6XQN6-2;H0YF31;H0YDA6;A0A087WUT5	Q6XQN6;Q6XQN6-3;C9J8U2;G5E977;Q6XQN6-2	Nicotinate phosphoribosyltransferase	NAPRT			0.131858	0.608586	12	12	12	32.3	57.578	31.753	0.102001	-0.102729	0.192825	0.335335
Q14554;Q14554-2;C9JY10;H7C4F9	Q14554;Q14554-2	Protein disulfide-isomerase A5	PDIA5			0.131754	0.170344	14	14	14	29.5	59.594	47.406	0.790909	0.417272	-0.423913	-0.257252
Q3L8U1-2;Q3L8U1-3;Q3L8U1;A0A087WU44;H3BTW3;J3KRH9;J3KSW5;H3BSP3;H3BRU9;C9JFU2;H7C294;Q8TD26-3	Q3L8U1-2;Q3L8U1-3;Q3L8U1	Chromodomain-helicase-DNA-binding protein 9	CHD9			0.131595	0.616969	28	22	19	11.3	324.05	53.421	0.0965297	-0.108985	0.291839	0.246995
M0R117;Q02543;M0R3D6;M0R1A7;M0R0P7	M0R117;Q02543;M0R3D6;M0R1A7;M0R0P7	60S ribosomal protein L18a	RPL18A			0.131587	0.691583	16	16	16	64.9	18.079	207.76	-0.0159258	0.000721115	0.297485	0.24407
O75460	O75460	Serine/threonine-protein kinase/endoribonuclease IRE1;Serine/threonine-protein kinase;Endoribonuclease	ERN1			0.131384	0.238695	26	26	26	36	109.73	96.951	-0.1141	-0.254685	0.197991	0.69633
Q8WUX9;E5RJI3;E5RIU9;Q8WUX9-2	Q8WUX9	Charged multivesicular body protein 7	CHMP7			0.131342	0.840934	21	21	21	52.5	50.91	204.49	0.0336287	0.0174944	0.170951	0.303294
B5MCF9;O00541;O00541-2;B3KXD6;H7C267	B5MCF9;O00541;O00541-2;B3KXD6	Pescadillo homolog	PES1			0.131139	0.467641	22	22	22	42.7	66.077	214.39	-0.0614305	-0.0776651	0.317536	0.346114
A0A0A0MR87;E9PSF2;Q15468;Q15468-2;Q5T0C7;H0Y702	A0A0A0MR87;E9PSF2;Q15468;Q15468-2;Q5T0C7	SCL-interrupting locus protein	STIL			0.131097	0.323081	4	4	4	3.7	137.83	5.6741	0.425094	0.038998	NaN	-0.0708015
O15111	O15111	Inhibitor of nuclear factor kappa-B kinase subunit alpha	CHUK			0.130916	0.410297	29	29	26	41.7	84.639	85.291	-0.125387	-0.0610292	0.370388	0.339692
B4E3L3;Q96RU2-2;Q96RU2;G3V1N5;H0YFT9;Q96RU2-3;H0YG96;H0YFA0;H0YFD7;H0YFX3	B4E3L3;Q96RU2-2;Q96RU2;G3V1N5	Ubiquitin carboxyl-terminal hydrolase;Ubiquitin carboxyl-terminal hydrolase 28	USP28			0.130898	0.212153	8	8	8	10.1	105.82	16.836	-0.121413	-0.304968	0.191057	0.758916
P15531;P15531-2;E7ERL0;E5RHP0;C9K028	P15531;P15531-2;E7ERL0;E5RHP0	Nucleoside diphosphate kinase A	NME1			0.130746	0.369359	12	1	1	70.4	17.149	30.737	-0.217851	0.0234682	0.420078	0.297289
Q86WJ1-2;Q86WJ1;A0A0A0MSH9;Q86WJ1-4;Q86WJ1-3;A0A0A0MRH8;Q86WJ1-5;A0A087WTM4;A0A087WWW4;A0A087WZM7	Q86WJ1-2;Q86WJ1;A0A0A0MSH9;Q86WJ1-4;Q86WJ1-3;A0A0A0MRH8;Q86WJ1-5	Chromodomain-helicase-DNA-binding protein 1-like	CHD1L			0.130721	0.459791	16	16	16	23	90.238	35.166	-0.145873	0.206518	0.40882	0.0534188
P61224;E7ESV4;F5H7Y6;F5GX62;P61224-3;F5H6R7;F5H004;A6NIZ1;P61224-4;F5GYB5;F5H0B7;F5H500;P61224-2;F5H077;F5GWU8;F5H491;F5H4H0;F5GYH7;F8WBC0	P61224;E7ESV4;F5H7Y6;F5GX62;P61224-3;F5H6R7;F5H004;A6NIZ1;P61224-4;F5GYB5;F5H0B7;F5H500;P61224-2	Ras-related protein Rap-1b;Ras-related protein Rap-1b-like protein	RAP1B			0.130545	0.594165	14	6	2	80.4	20.825	117.88	0.214391	-0.0823467	0.0486547	0.341482
P61599;A8MZB2;P61599-2	P61599;A8MZB2	N-alpha-acetyltransferase 20	NAA20			0.130397	0.385736	10	10	10	50.6	20.368	22.775	-0.160017	-0.0120534	0.462785	0.230872
Q9UI09;F8VRD8;Q9UI09-2;F8VXI1;H0YID5;H0YIT1	Q9UI09	NADH dehydrogenase [ubiquinone] 1 alpha subcomplex subunit 12	NDUFA12			0.130364	0.640651	12	12	12	71	17.114	57.299	0.28736	-0.0592694	0.0271541	0.266212
Q16540;A6NJD9;A8MVT4;A8MYK1;H7C2P7	Q16540;A6NJD9;A8MVT4;A8MYK1	39S ribosomal protein L23, mitochondrial	MRPL23			0.130336	0.287711	7	7	7	54.2	17.781	79.769	0.13641	-0.296474	0.109829	0.571579
Q969N2-4;Q969N2-5;Q969N2;Q969N2-2;F6W983;Q969N2-6;Q969N2-3;H7C2Y2;B7Z7C5	Q969N2-4;Q969N2-5;Q969N2;Q969N2-2;F6W983;Q969N2-6	GPI transamidase component PIG-T	PIGT			0.13029	0.444183	10	10	10	25.6	54.118	30.741	0.0439284	-0.123402	0.14978	0.450853
Q9Y6M9;E9PH64;E7EWZ0;E9PF49	Q9Y6M9;E9PH64;E7EWZ0;E9PF49	NADH dehydrogenase [ubiquinone] 1 beta subcomplex subunit 9	NDUFB9			0.130241	0.324551	11	11	11	76	21.831	87.684	0.0515188	-0.232752	0.165044	0.537152
Q9H4A4;A6NKB8;A0A087WU27;C9JMZ3;A0A087WUS4;H7C2T3	Q9H4A4;A6NKB8	Aminopeptidase B	RNPEP			0.130222	0.560283	24	24	24	50.9	72.595	180.4	-0.0794293	0.00805652	0.274888	0.317373
O94888;C9JAT7;F8WB69;C9JD50;H7BYF4	O94888;C9JAT7	UBX domain-containing protein 7	UBXN7			0.130217	1.13895	20	20	20	53.6	54.862	296.02	0.0550216	0.0443242	0.183201	0.238323
A0A087WXM6;J3QQT2;J3KRX5;A0A0A6YYL6;P18621;P18621-3;J3QLC8;J3KRB3;A0A087WWH0;J3QS96;A0A0A0MRF8;P18621-2;A0A087WY81;J3KSJ0	A0A087WXM6;J3QQT2;J3KRX5;A0A0A6YYL6;P18621;P18621-3;J3QLC8;J3KRB3;A0A087WWH0;J3QS96;A0A0A0MRF8;P18621-2;A0A087WY81	60S ribosomal protein L17	RPL17;RPL17-C18orf32			0.130187	0.455442	11	11	11	59.8	19.586	73.197	0.169615	-0.174231	0.125387	0.399978
Q9NPG3-2;Q9NPG3;K7EQR1;K7EJT1	Q9NPG3-2;Q9NPG3	Ubinuclein-1	UBN1			0.130187	0.43614	7	7	7	9	118.55	12.957	-0.0112093	0.352193	NaN	0.0495764
P46926;D6R9P4;D6RAY7;D6RFF8;P46926-2;D6RB13;D6R917;V9GYK3;D6RFK5;V9GYW0	P46926;D6R9P4;D6RAY7;D6RFF8;P46926-2;D6RB13;D6R917	Glucosamine-6-phosphate isomerase 1;Glucosamine-6-phosphate isomerase	GNPDA1			0.130185	0.944803	18	18	12	74	32.668	212.67	0.0136255	0.250962	0.209516	0.0466379
P31153	P31153	S-adenosylmethionine synthase isoform type-2	MAT2A			0.130155	0.487228	23	23	8	60	43.66	308.5	-0.017922	-0.100995	0.33754	0.301995
K7ENL9;Q96DM3	K7ENL9;Q96DM3	Uncharacterized protein C18orf8	C18orf8			0.130105	0.379508	19	19	8	37.9	69.389	49.143	0.0515935	-0.0440624	-0.0284546	0.541345
Q92542-2;Q92542;Q5T205;H0Y3Z4;H0Y6T7;Q5T209	Q92542-2;Q92542;Q5T205;H0Y3Z4;H0Y6T7	Nicastrin	NCSTN			0.130031	0.402778	11	11	9	21.8	76.743	93.005	-0.0607391	-0.130334	0.382833	0.328362
Q7RTS9;Q7RTS9-2;J3QR81;J3KRG4;J3QQT7;J3KSF9;J3QSE7;J3QRF2;J3QRD8	Q7RTS9;Q7RTS9-2	Dymeclin	DYM			0.129817	0.526531	11	11	9	17.8	75.935	18.114	0.28773	0.324119	-0.0858182	-0.00676469
Q9HCG8;B7WP74	Q9HCG8;B7WP74	Pre-mRNA-splicing factor CWC22 homolog	CWC22			0.129768	0.530108	21	21	21	21.1	105.47	87.444	-0.0356239	-0.0571364	0.275603	0.336227
E9PKH8;P11836;P11836-2;E9PPL6	E9PKH8;P11836;P11836-2	B-lymphocyte antigen CD20	MS4A1			0.129751	0.525846	11	11	11	34.2	31.609	323.31	0.321423	0.27608	-0.119072	0.040571
P62899;C9JU56;B7Z4E3;B7Z4C8;P62899-3;P62899-2;B8ZZK4;H7C2W9	P62899;C9JU56;B7Z4E3;B7Z4C8;P62899-3;P62899-2;B8ZZK4;H7C2W9	60S ribosomal protein L31	RPL31			0.12956	0.9115	11	11	11	48	14.463	29.072	-0.00129785	0.0847447	0.287	0.147793
Q9UBS4;H7C2Y5	Q9UBS4;H7C2Y5	DnaJ homolog subfamily B member 11	DNAJB11			0.12955	0.582395	16	16	16	51.4	40.513	196.67	0.16524	-0.0781067	0.0628125	0.368253
O60870-2;O60870;S4R357	O60870-2;O60870	DNA/RNA-binding protein KIN17	KIN			0.129544	0.53682	10	10	10	28.1	43.261	24.638	-0.0508848	0.00100953	0.398241	0.16981
Q69YQ0-2;Q69YQ0;C9J8U1;F8WAN1;C9JLY8	Q69YQ0-2;Q69YQ0;C9J8U1;F8WAN1	Cytospin-A	SPECC1L;SPECC1L-ADORA2A		+	0.129339	2.21972	14	14	14	14.9	120.18	31.339	0.127983	0.106616	0.182057	0.100701
Q12873;Q12873-3;Q12873-2;H7C2H0;I3L229;H7C3H7;K7EPV1	Q12873;Q12873-3;Q12873-2	Chromodomain-helicase-DNA-binding protein 3	CHD3			0.129223	0.903471	57	38	27	29.9	226.59	158.12	0.0163807	0.0309717	0.225522	0.244019
Q8NDV7-6;Q8NDV7-5;Q8NDV7;Q8NDV7-2;H7C269;H3BRT3;Q8NDV7-4	Q8NDV7-6;Q8NDV7-5;Q8NDV7;Q8NDV7-2;H7C269	Trinucleotide repeat-containing gene 6A protein	TNRC6A			0.129026	0.28489	7	7	6	5.8	205.15	20.005	0.160363	-0.194543	0.612683	-0.062398
Q6P4Q7;Q6P4Q7-2	Q6P4Q7;Q6P4Q7-2	Metal transporter CNNM4	CNNM4			0.129001	0.3503	7	6	6	13.4	86.606	33.777	0.268591	-0.242567	0.0489337	0.441047
B7Z9U0;Q9UFF9-2;Q9UFF9-3;Q9UFF9;E5RIL2	B7Z9U0;Q9UFF9-2;Q9UFF9-3;Q9UFF9;E5RIL2	CCR4-NOT transcription complex subunit 8	CNOT8			0.128745	0.195999	4	4	4	42.2	14.656	22.679	NaN	-0.0268222	-0.174866	0.587923
Q06210-2;Q06210	Q06210-2;Q06210	Glutamine--fructose-6-phosphate aminotransferase [isomerizing] 1	GFPT1		+	0.128709	1.37598	41	41	35	69.5	76.758	323.31	0.0865686	0.0447438	0.179638	0.203884
Q9UBC2;Q9UBC2-2;Q9UBC2-3;M0R165;Q9UBC2-4;M0R2S2;M0R3I1;M0R1V5;M0QX30;K7EJR2;M0R330	Q9UBC2;Q9UBC2-2;Q9UBC2-3;M0R165;Q9UBC2-4;M0R2S2	Epidermal growth factor receptor substrate 15-like 1	EPS15L1			0.128614	0.728816	38	38	38	55.6	94.254	248.78	-0.0112093	0.0301242	0.320658	0.174882
Q9Y266	Q9Y266	Nuclear migration protein nudC	NUDC			0.128568	0.589414	27	27	15	65.9	38.242	323.31	-0.044464	-0.00876934	0.333653	0.233854
Q96BY7	Q96BY7	Autophagy-related protein 2 homolog B	ATG2B			0.128504	0.589922	41	41	39	25.9	232.76	134.9	0.32366	0.235359	-0.0798287	0.0348253
O14593;A0A024R7P0;O14593-3;O14593-2;K7ENE6;H0YGQ6;F5GY33	O14593;A0A024R7P0;O14593-3;O14593-2	DNA-binding protein RFXANK	RFXANK			0.128456	1.29292	5	5	5	34.6	28.102	50.106	0.0420556	0.123004	0.238175	0.110589
P62750;H7BY10;K7EJV9;K7ERT8;A8MUS3;K7EMA7	P62750;H7BY10;K7EJV9;K7ERT8;A8MUS3;K7EMA7	60S ribosomal protein L23a	RPL23A			0.128442	1.02941	13	13	13	57.1	17.695	76.616	0.0985828	-0.00733303	0.195096	0.227422
Q6P996-4;Q6P996-5;Q6P996;A0A0G2JPZ1;H3BND4;Q6P996-3;Q86XE2;Q6P996-2;J3KNK7;Q6P474;Q6XYB5;H3BNL6;H3BPV5;H3BM88;H3BU11;H3BQ54	Q6P996-4;Q6P996-5;Q6P996;A0A0G2JPZ1;H3BND4;Q6P996-3;Q86XE2	Pyridoxal-dependent decarboxylase domain-containing protein 1	PDXDC1			0.128202	0.634319	34	34	34	61.4	83.571	276.57	0.0262639	-0.0449849	0.194465	0.337065
A0A0C4DGS1;P39656;P39656-3;P39656-2;U3KQ84	A0A0C4DGS1;P39656;P39656-3;P39656-2	Dolichyl-diphosphooligosaccharide--protein glycosyltransferase 48 kDa subunit	DDOST			0.128142	0.734581	22	22	22	65.8	48.799	323.31	0.293465	0.126576	-0.0677574	0.160282
Q8N511;J3KRW7;J3KS81	Q8N511;J3KRW7;J3KS81	Transmembrane protein 199	TMEM199			0.127992	0.377676	8	8	8	27.4	23.13	41.522	0.26067	-0.28207	0.244156	0.28921
Q9BRA0;I3L4V0;I3L3Z2;Q9BRA0-2;A0A0B4J297;I3L310	Q9BRA0;I3L4V0;I3L3Z2;Q9BRA0-2	N-alpha-acetyltransferase 38, NatC auxiliary subunit	NAA38			0.127903	0.744394	5	5	5	60.8	13.514	14.778	0.0310614	NaN	0.10608	0.246567
P62873;P62873-2;B3KVK2;F6UT28;F6X3N5;B1AKQ8	P62873;P62873-2;B3KVK2	Guanine nucleotide-binding protein G(I)/G(S)/G(T) subunit beta-1	GNB1		+	0.127653	2.35286	18	11	10	74.4	37.377	240.47	0.136299	0.0794293	0.152768	0.142115
A0A087X0Q9;Q9BVL4	A0A087X0Q9;Q9BVL4	Selenoprotein O	SELO			0.127592	0.637005	11	11	11	26.6	73.338	61.878	0.355848	0.135404	0.0680517	-0.0489337
Q9Y6A5;C9JWI7;E7EMT0;C9JA91;Q8IX09;F8WC55;H0Y8F2	Q9Y6A5	Transforming acidic coiled-coil-containing protein 3	TACC3		+	0.127424	1.92125	20	20	20	36.6	90.359	166.22	0.185671	0.138945	0.109026	0.0760523
W4VSQ9;Q15642-4;Q15642-2;Q15642-3;Q15642;M0R2H7;M0R0F9;Q15642-5;M0R070	W4VSQ9;Q15642-4;Q15642-2;Q15642-3;Q15642;M0R2H7;M0R0F9;Q15642-5	Cdc42-interacting protein 4	TRIP10			0.127378	0.150781	6	6	6	15	67.73	20.454	-0.271187	-0.524189	0.675184	0.629702
Q9Y2Z2-4;Q9Y2Z2-6;Q9Y2Z2;Q9Y2Z2-2;Q9Y2Z2-3;E7EWI1;H0YBI9;H0YB81;E5RFF7;H7C2S9;H0YC00	Q9Y2Z2-4;Q9Y2Z2-6;Q9Y2Z2;Q9Y2Z2-2;Q9Y2Z2-3	Protein MTO1 homolog, mitochondrial	MTO1			0.127289	0.43956	21	21	3	36.4	77.3	51.889	-0.0745054	-0.0828814	0.319271	0.34727
Q9Y3U8;J3QSB5;J3KTD3	Q9Y3U8;J3QSB5	60S ribosomal protein L36	RPL36			0.127212	0.923009	13	13	13	47.6	12.254	96.899	-0.0164963	0.0888201	0.256045	0.180479
Q9HD34;C9JY28;C9JRX8;F5H189;H7C4Q5;C9J799	Q9HD34;C9JY28;C9JRX8;F5H189;H7C4Q5	LYR motif-containing protein 4	LYRM4			0.127208	0.686748	6	6	6	54.9	10.758	16.253	0.0156075	-0.0265871	0.217727	0.302084
A0A087WVA8;Q8IWB9;Q8IWB9-2;J3KRZ8	A0A087WVA8;Q8IWB9;Q8IWB9-2;J3KRZ8	Testis-expressed sequence 2 protein	TEX2			0.127052	0.907882	6	6	6	6.4	125.38	8.0856	0.087013	0.00719549	0.291132	0.122868
P20042	P20042	Eukaryotic translation initiation factor 2 subunit 2	EIF2S2			0.127025	0.9319	39	39	39	85	38.388	323.31	-0.00259445	0.0947765	0.277509	0.13841
Q03518	Q03518	Antigen peptide transporter 1	TAP1			0.126879	0.511688	14	14	14	29	87.217	125.44	0.310343	-0.0280426	-0.0752312	0.300448
P22570;P22570-7;P22570-5;P22570-3;P22570-4;P22570-2;A0A0C4DFN8;A0A0A0MSZ4;A0A0A0MTR6;A0A0A0MT64;A0A0A0MTN9;A0A0C4DGN7;P22570-6;J3QQX3;J3QKZ8;J3QQW7;J3KS64	P22570;P22570-7;P22570-5;P22570-3;P22570-4;P22570-2;A0A0C4DFN8;A0A0A0MSZ4;A0A0A0MTR6;A0A0A0MT64;A0A0A0MTN9;A0A0C4DGN7;P22570-6;J3QQX3	NADPH:adrenodoxin oxidoreductase, mitochondrial	FDXR			0.126868	0.256045	28	28	28	62.7	53.836	128.98	-0.0304066	-0.30139	0.247198	0.592071
P32969;H0Y9V9;D6RAN4;E7ESE0;H0Y9R4	P32969;H0Y9V9;D6RAN4;E7ESE0	60S ribosomal protein L9	RPL9			0.126778	0.978083	12	12	12	66.7	21.863	323.31	0.172295	-0.0357862	0.209516	0.161088
P61513;C9J4Z3;Q6P4E4;E9PEL3;G5E9R3;M0R0A1;M0R2L6;A6NKH3	P61513;C9J4Z3;Q6P4E4;E9PEL3;G5E9R3;M0R0A1;M0R2L6	60S ribosomal protein L37a	RPL37A			0.126723	0.806867	6	6	6	58.7	10.275	52.214	-0.016211	0.1121	0.308477	0.102527
Q969M3;Q969M3-3;E5RGR9;E5RHH4;Q969M3-2	Q969M3;Q969M3-3;E5RGR9;E5RHH4;Q969M3-2	Protein YIPF5;Protein YIPF	YIPF5			0.126688	0.739632	2	2	2	8.2	27.989	6.3213	0.114738	-0.074441	0.210015	0.256442
A0A087WWK8;Q6DN90;A0A0C4DGT3;Q6DN90-2;A0A0G2JLG2;Q9UPP2-2;Q9UPP2	A0A087WWK8;Q6DN90;A0A0C4DGT3;Q6DN90-2	IQ motif and SEC7 domain-containing protein 1	IQSEC1			0.126639	0.183842	31	31	26	30.3	124.48	85.731	0.571472	0.56881	-0.309145	-0.32458
Q14114-2;Q14114-4;Q14114-3;Q14114;A0A087WW84;E9PP15;H0YEV6	Q14114-2;Q14114-4;Q14114-3;Q14114;A0A087WW84;E9PP15	Low-density lipoprotein receptor-related protein 8	LRP8			0.126505	0.332124	5	5	5	10	77.844	7.7715	0.286814	-0.15547	0.24817	NaN
B7WPE2;Q32P44;H0Y3M3;Q32P44-2;G3V1D0;G3V195;H7C355;C9J6V3;E9PJV5;E9PSB4;Q32P44-3	B7WPE2;Q32P44;H0Y3M3;Q32P44-2;G3V1D0;G3V195	Echinoderm microtubule-associated protein-like 3	EML3			0.126384	0.591087	21	21	21	29.5	95.283	59.143	-0.0102069	-0.045223	0.315102	0.245865
Q9Y376;A0A087X0K1	Q9Y376;A0A087X0K1	Calcium-binding protein 39	CAB39			0.126348	0.640179	25	25	21	65.4	39.869	196.36	-0.051024	0.15549	0.343806	0.0571215
X1WI28;P27635;Q96L21;B8A6G2;A6QRI9	X1WI28;P27635;Q96L21	60S ribosomal protein L10;60S ribosomal protein L10-like	RPL10;RPL10L			0.126332	0.756989	14	14	4	57.7	23.072	177	0.00530433	0.000144286	0.254957	0.244924
Q6P1M0;Q6P1M0-2	Q6P1M0	Long-chain fatty acid transport protein 4	SLC27A4			0.126315	0.387888	18	18	18	36.5	72.063	73.306	0.17811	-0.192249	0.0732718	0.446128
E7ESC7;Q7L5Y9-3;Q7L5Y9;Q7L5Y9-2;B4DQT1;B4DVN3;D6RIB6;Q7L5Y9-4;D6RDW4;D6REW7;Q7L5Y9-5;D6RID6;D6RE80;D6RA86;D6R8Z3	E7ESC7;Q7L5Y9-3;Q7L5Y9;Q7L5Y9-2;B4DQT1;B4DVN3;D6RIB6;Q7L5Y9-4;D6RDW4;D6REW7;Q7L5Y9-5	Macrophage erythroblast attacher	MAEA			0.126307	0.791433	12	12	12	29.3	49.392	26.832	0.0601866	-0.0176945	0.297837	0.164901
Q7Z2W9;Q7Z2W9-2;H3BUY0;F5H7V8	Q7Z2W9;Q7Z2W9-2;H3BUY0;F5H7V8	39S ribosomal protein L21, mitochondrial	MRPL21			0.126069	0.428105	10	10	10	46.3	22.814	66.908	-0.0418037	-0.120498	0.339936	0.326643
Q96MD7-1;F6X0R3;Q96MD7;E9PN32;Q96MD7-2	Q96MD7-1	Uncharacterized protein C9orf85	C9orf85			0.126065	0.936651	5	5	5	25.5	18.264	20.925	0.0413726	0.133958	0.285698	0.0432296
Q13451;Q13451-2	Q13451	Peptidyl-prolyl cis-trans isomerase FKBP5;Peptidyl-prolyl cis-trans isomerase FKBP5, N-terminally processed	FKBP5			0.125693	0.557075	34	34	34	66.1	51.212	323.31	-0.0264459	-0.0504726	0.294547	0.285143
Q9UFM8;Q9Y639-3;Q9Y639-1;Q9Y639-4;Q9Y639-5;Q9Y639;H3BU51	Q9UFM8;Q9Y639-3;Q9Y639-1;Q9Y639-4;Q9Y639-5;Q9Y639	Neuroplastin	DKFZp566H1924;NPTN			0.125385	0.2341	4	4	4	15.9	34.815	16.052	-0.175812	-0.277901	0.49774	0.457514
E9PLI6;E9PS76;Q8N9N8;E9PS30;E9PQD0;E9PNH5	E9PLI6;E9PS76;Q8N9N8;E9PS30	Probable RNA-binding protein EIF1AD	EIF1AD			0.125379	0.32607	7	7	7	72.6	13.062	56.498	-0.065848	-0.202705	0.40806	0.36201
Q7L8L6	Q7L8L6	FAST kinase domain-containing protein 5	FASTKD5			0.125234	0.551322	21	21	21	37.4	86.573	150.22	-0.081067	0.0082	0.266157	0.307644
Q96IY1;Q5SY74;Q96IY1-2;Q5SY76	Q96IY1;Q5SY74;Q96IY1-2	Kinetochore-associated protein NSL1 homolog	NSL1		+	0.125128	1.35076	9	9	9	43.4	32.162	58.84	0.0589387	0.087327	0.123799	0.230448
Q9Y3I0	Q9Y3I0	tRNA-splicing ligase RtcB homolog	RTCB			0.124995	0.583015	31	31	31	71.1	55.21	323.31	-0.0471196	-0.0143247	0.300651	0.260774
Q9Y619;Q5VZD9;F2Z354	Q9Y619;Q5VZD9	Mitochondrial ornithine transporter 1	SLC25A15			0.124994	0.195237	7	7	7	37.9	32.736	27.084	0.583917	0.468844	-0.413576	-0.139208
P60468;S4R3B5	P60468	Protein transport protein Sec61 subunit beta	SEC61B			0.124962	0.255483	3	3	3	37.5	9.9743	15.917	0.490254	-0.0586383	-0.315127	0.38336
Q12792;Q12792-3;Q12792-4;F8VS81;F8W1Q9;F8W645;F8VRG3	Q12792;Q12792-3;Q12792-4;F8VS81	Twinfilin-1	TWF1			0.124955	0.703725	24	19	19	63.4	40.282	276.47	0.263092	0.235482	0.0586628	-0.0574155
P46779;H0YKD8;P46779-2;P46779-3	P46779;H0YKD8;P46779-2;P46779-3	60S ribosomal protein L28	RPL28			0.124561	0.639155	12	12	5	60.6	15.747	21.727	0.0457143	-0.0688768	0.288654	0.232752
Q6N063;F5H145;Q6N063-4;Q6N063-2	Q6N063;F5H145;Q6N063-4;Q6N063-2	2-oxoglutarate and iron-dependent oxygenase domain-containing protein 2	OGFOD2		+	0.124552	1.61549	3	3	3	19.1	38.996	33.644	0.0559362	0.109962	0.198117	0.134192
M0QZR4;Q92888;Q92888-3;Q92888-2;Q92888-4;M0QYC1;M0R2C7;M0QYS3;M0QZH8;M0R3H5;M0QXV6;REV__Q9BZR6;REV__H7C0V4;REV__H7C215	M0QZR4;Q92888;Q92888-3;Q92888-2;Q92888-4;M0QYC1	Rho guanine nucleotide exchange factor 1	ARHGEF1			0.124535	0.532752	54	54	54	50.8	108.32	323.31	-0.0846086	-0.000375143	0.2949	0.288223
Q9NWU2	Q9NWU2	Glucose-induced degradation protein 8 homolog	GID8			0.124496	0.651536	9	9	9	53.5	26.748	100.27	0.00637642	-0.0344854	0.234379	0.291716
F8WF49;A0A0B4J2C2;Q9Y2H0-3;Q9Y2H0-1;Q9Y2H0;A0A087X246	F8WF49;A0A0B4J2C2;Q9Y2H0-3;Q9Y2H0-1;Q9Y2H0	Disks large-associated protein 4	DLGAP4			0.124278	0.302829	3	3	3	13.5	26.941	6.1248	-0.0040339	-0.049039	NaN	0.425908
P0CAP2-3;P0CAP2;H8Y6P7;P0CAP2-2;Q9BZD3;P0CAP1-11;E9PP13	P0CAP2-3;P0CAP2;H8Y6P7;P0CAP2-2;Q9BZD3	DNA-directed RNA polymerase II subunit GRINL1A;Putative GRINL1B complex locus protein 2	POLR2M;GCOM1;GCOM2			0.124168	0.745156	11	11	11	33.9	40.733	38.26	-0.0563061	0.0899048	0.185993	0.277079
Q86TS9-3;Q86TS9;Q86TS9-2;G3V3U6;G5E9P5	Q86TS9-3;Q86TS9;Q86TS9-2;G3V3U6	39S ribosomal protein L52, mitochondrial	MRPL52			0.124088	0.553381	4	4	4	49.2	13.592	61.281	0.0120243	0.000144286	0.0825663	0.401616
F5GZ78;P49023-2;P49023;P49023-3;P49023-4;H0YIE4;F5H836	F5GZ78;P49023-2;P49023;P49023-3;P49023-4	Paxillin	PXN			0.124077	0.421449	10	10	10	22.4	64.232	54.837	0.0586382	-0.0202381	0.481092	-0.0231843
K7ELC2;P62841;K7EM56;A0A0B4J2B4;S4R417;K7EQJ5;K7EJ78;S4R456	K7ELC2;P62841;K7EM56;A0A0B4J2B4;S4R417;K7EQJ5;K7EJ78;S4R456	40S ribosomal protein S15	RPS15			0.124055	0.825812	8	8	8	64.5	17.723	212.29	0.118132	-0.0447318	0.157303	0.265518
Q9HB58-6;Q9HB58;G5E9C0;Q9HB58-5;Q9HB58-3;Q9HB58-7;E9PHK4;E7EM70;Q9HB58-2;C9JZQ4;Q9HB58-4	Q9HB58-6;Q9HB58;G5E9C0;Q9HB58-5;Q9HB58-3;Q9HB58-7;E9PHK4;E7EM70	Sp110 nuclear body protein	SP110			0.124021	0.293761	7	6	6	11.9	81.168	20.533	-0.107822	0.0618453	-0.0669864	0.609046
P40818;P40818-2;A0A075B720;H0YNL5;H0YM47;H0YKV1;H0YLH2;H0YM17;H0YLS3	P40818;P40818-2;A0A075B720	Ubiquitin carboxyl-terminal hydrolase 8	USP8			0.123924	0.403384	36	36	36	37.9	127.52	130.03	-0.0549179	-0.114473	0.410124	0.25496
Q49AQ3;H0YI10;F8VXY1;Q8N5B7-2;Q8N5B7;Q6ZMG9;Q6ZMG9-2	Q49AQ3;H0YI10;F8VXY1;Q8N5B7-2;Q8N5B7	Ceramide synthase 5	LASS5;CERS5			0.123913	0.276797	3	3	3	12.3	22.187	2.4946	0.36898	-0.356846	0.0899048	0.393615
P11142;E9PKE3;P11142-2;E9PNE6;E9PLF4;E9PQQ4;E9PQK7;E9PK54;E9PPY6;E9PN25	P11142;E9PKE3;P11142-2;E9PNE6	Heat shock cognate 71 kDa protein	HSPA8			0.123852	0.739798	51	48	1	68.6	70.897	323.31	-0.0184918	0.0635029	0.317536	0.132863
Q969Y2-3;Q969Y2;Q969Y2-4;Q969Y2-2;M0R0S9;M0R1X0	Q969Y2-3;Q969Y2;Q969Y2-4;Q969Y2-2	tRNA modification GTPase GTPBP3, mitochondrial	GTPBP3			0.123765	1.0339	16	16	16	42.7	49.846	97.176	0.116958	0.0187766	0.0973411	0.261984
Q15437;Q5QPE2;Q5QPE1	Q15437	Protein transport protein Sec23B	SEC23B			0.123628	1.0064	41	41	38	67.9	86.478	323.31	0.22484	0.0877344	-0.00649231	0.18843
Q9HBH1	Q9HBH1	Peptide deformylase, mitochondrial	PDF			0.123621	0.416446	10	10	10	53.1	27.013	36.208	0.321459	0.0292761	-0.176414	0.320162
F8VXI8;F8VX10;Q9H9L4;H0YIQ8;F8VUX5;Q9H9L4-4;H0YID1;H0YHR2;F8VRX7;F8VP38	F8VXI8;F8VX10;Q9H9L4;H0YIQ8;F8VUX5;Q9H9L4-4	KAT8 regulatory NSL complex subunit 2	KANSL2			0.123586	0.649787	9	9	9	24.2	50.956	60.086	0.111087	-0.0902653	0.177599	0.295925
Q96EV2;H0Y3K4;A0A0C4DFS3;H7C0H2;H0Y3K3;H7BXM6;A8MTF7;Q96EV2-2	Q96EV2;H0Y3K4	RNA-binding protein 33	RBM33			0.123456	1.27198	23	23	23	24.8	129.98	201.14	0.0765542	0.0802483	0.0945064	0.242516
Q9NRR4-2;Q9NRR4-4;Q9NRR4;Q9NRR4-3;H7C5U6	Q9NRR4-2;Q9NRR4-4;Q9NRR4;Q9NRR4-3	Ribonuclease 3	DROSHA			0.123416	0.364499	5	5	5	4.1	151.29	14.95	0.098382	NaN	0.353888	-0.0820213
P61254;J3QRI7;J3QQQ9;J3QQV1;J3QRC4;J3KTJ8;E5RIT6;J3KS10;J3KSS0;E5RHH1	P61254;J3QRI7;J3QQQ9;J3QQV1;J3QRC4;J3KTJ8;E5RIT6	60S ribosomal protein L26	RPL26;RPL26L1			0.123397	0.60318	12	12	2	54.5	17.258	79.135	-0.0093472	-0.0423231	0.285816	0.259444
S4R329;H0YK61;H0YNK0;H0YNK8;Q5J8M3-3;Q5J8M3-2;Q5J8M3;H0YLP8;H0YMH5;H0YN63	S4R329;H0YK61;H0YNK0;H0YNK8;Q5J8M3-3;Q5J8M3-2;Q5J8M3;H0YLP8;H0YMH5	ER membrane protein complex subunit 4	EMC4			0.123285	0.405504	4	4	4	77.8	7.8036	14.386	0.166066	-0.137045	0.0187766	0.445342
Q9H1N7;Q9H1N7-2;Q9H1N7-3	Q9H1N7;Q9H1N7-2;Q9H1N7-3	Adenosine 3-phospho 5-phosphosulfate transporter 2	SLC35B3			0.123245	0.326445	2	2	2	5.2	44.592	3.5092	0.285671	-0.155518	NaN	0.239583
Q9UJ70;H7C3G9;Q9UJ70-2;C9JEV6;H7C286;H7C1L7;H0YEB7;E9PPU6;H0YC94;H0YE82;H0YF44	Q9UJ70;H7C3G9;Q9UJ70-2;C9JEV6;H7C286	N-acetyl-D-glucosamine kinase	NAGK		+	0.123093	1.3598	21	21	21	87.2	37.375	217.91	0.172717	0.0359054	0.0903115	0.193437
Q9BV81	Q9BV81	ER membrane protein complex subunit 6	EMC6			0.12304	0.405623	1	1	1	11.8	12.017	1.9128	0.188463	-0.0986445	NaN	0.279301
A0A087X0V5;P29728-2;P29728;F8W1C5;P29728-3	A0A087X0V5;P29728-2;P29728	2-5-oligoadenylate synthase 2	OAS2			0.122958	0.204872	22	22	22	38.8	83.234	219.6	0.531969	0.493955	-0.303276	-0.230818
P53990-2;P53990;P53990-4;H3BMU1;H3BUI0;P53990-3;P53990-5;H3BQF7;J3KR23;F5GXM3;H3BRE2;P53990-6;H3BPP6;H3BQ38;E9PF00	P53990-2;P53990;P53990-4;H3BMU1;H3BUI0;P53990-3;P53990-5;H3BQF7;J3KR23;F5GXM3	IST1 homolog	IST1			0.122889	0.986687	14	14	14	46.3	36.622	96.415	-0.0107799	0.095587	0.23585	0.170897
P46778;M0R181;G3V1B3	P46778;M0R181;G3V1B3	60S ribosomal protein L21	RPL21			0.122883	0.778272	8	8	8	41.2	18.565	72.555	0.120529	-0.0672283	0.210638	0.227591
Q9H4M9;A0A024R571;C9JC03;C9J2Z4;C9JDQ8;C9JIJ3;C9IZH1	Q9H4M9;A0A024R571;C9JC03;C9J2Z4	EH domain-containing protein 1	EHD1			0.122836	0.660649	43	43	28	84.6	60.626	323.31	0.0788075	-0.0598107	0.151989	0.32036
Q9H773;H3BSA6;H3BPN2	Q9H773	dCTP pyrophosphatase 1	DCTPP1			0.122836	0.393864	13	13	13	79.4	18.681	168.54	0.032979	-0.195385	0.326997	0.326751
P23511-2;P23511	P23511-2;P23511	Nuclear transcription factor Y subunit alpha	NFYA			0.122797	0.0829208	3	3	3	15.4	33.939	97.933	1.62073	-0.124094	-0.688148	-0.317304
O94921-3;O94921-2;O94921;E7EUK8;C9IYJ9;C9JWL6;F8WF96;Q96Q40-2;Q96Q40-4;Q96Q40-3;Q96Q40-5;Q96Q40	O94921-3;O94921-2;O94921;E7EUK8	Cyclin-dependent kinase 14	CDK14			0.122663	0.385214	14	13	12	40.2	47.759	42.224	-0.104873	-0.0692854	0.224781	0.440029
Q9UJX3-2;Q9UJX3;H0YIW2;H0YIX7	Q9UJX3-2;Q9UJX3	Anaphase-promoting complex subunit 7	ANAPC7			0.122553	0.375581	25	25	25	59.2	60.002	179.39	-0.108759	-0.102744	0.346531	0.355184
P00558;P00558-2	P00558;P00558-2	Phosphoglycerate kinase 1	PGK1		+	0.122299	2.00356	30	30	26	81.1	44.614	323.31	0.0836762	0.131326	0.177216	0.0969771
J3KN29;O00233;F5H5V4;F5GX23;O00233-2;F5H7X1;F5H169;O00233-3	J3KN29;O00233;F5H5V4;F5GX23;O00233-2;F5H7X1;F5H169	26S proteasome non-ATPase regulatory subunit 9	PSMD9			0.122275	0.947729	12	12	12	43.2	24.553	323.31	-0.0149266	0.0875986	0.23585	0.180577
P35268;K7ERI7;K7ELC4;K7EMH1;K7EP65;K7EKS7;K7EJT5	P35268;K7ERI7;K7ELC4;K7EMH1;K7EP65;K7EKS7	60S ribosomal protein L22	RPL22			0.122193	0.679009	7	7	6	59.4	14.787	282.37	0.0550517	-0.0612099	0.224287	0.270643
Q6ZSZ5;Q6ZSZ5-2;M0QZS0	Q6ZSZ5;Q6ZSZ5-2;M0QZS0	Rho guanine nucleotide exchange factor 18	ARHGEF18			0.122086	0.913164	39	39	1	42.7	130.78	323.31	-0.0139267	0.0966667	0.261832	0.143771
A0A0C4DFT3;Q12959-5;Q12959-3;Q12959-6;Q12959-4;Q12959;Q12959-7;Q12959-2;E7EQD7;B4E2H8;H7C166;B7Z264;E9PIW2;B7Z2T4;E9PN83;Q15700-3;Q15700;Q15700-4;Q15700-2;C9IYP1;H7C325;C9JCP6;A8MUT6;A8MUT9;B5MCC5;Q6ZSU2;Q15700-5;C9J110;F2Z2L0;C9JUA9;C9JN61;F8W750;C9JWP9;C9JYG3;O14909	A0A0C4DFT3;Q12959-5;Q12959-3;Q12959-6;Q12959-4;Q12959;Q12959-7;Q12959-2;E7EQD7	Disks large homolog 1	DLG1			0.122031	0.464001	20	20	2	35.9	99.813	323.31	0.214742	0.362779	0.054779	-0.144177
A2A376;O95786-2;O95786	A2A376;O95786-2;O95786	Probable ATP-dependent RNA helicase DDX58	DDX58			0.122004	0.0641834	3	3	3	5.7	82.612	16.712	-0.367595	-0.623554	NaN	1.35716
Q9UIJ7;Q9UIJ7-3;Q9UIJ7-2	Q9UIJ7;Q9UIJ7-3;Q9UIJ7-2	GTP:AMP phosphotransferase AK3, mitochondrial	AK3			0.121735	0.240226	17	17	17	78.9	25.565	128.04	-0.150949	-0.261483	0.360083	0.539289
P30519;A0A087WT44;I3L159;I3L1F5;I3L4P8;I3L463;I3L276;I3L1Y2	P30519;A0A087WT44;I3L159;I3L1F5;I3L4P8;I3L463	Heme oxygenase 2	HMOX2			0.121681	0.876169	20	20	2	68.4	36.032	323.31	0.036807	0.00302647	0.236829	0.210062
Q9NR31;Q9NR31-2;H0Y5E8;Q5SQT8;X1WI22	Q9NR31;Q9NR31-2	GTP-binding protein SAR1a	SAR1A		+	0.121679	1.36906	17	17	13	78.3	22.367	272.4	0.0767975	0.0754641	0.10742	0.227033
Q9H9J2	Q9H9J2	39S ribosomal protein L44, mitochondrial	MRPL44			0.121361	0.578129	15	15	15	44.9	37.535	165.79	0.0550666	-0.0783047	0.169155	0.339528
Q969V3-2;Q969V3;K7EMW4;A0A0C4DGP7;K7ELZ9;K7ENM2;K7EQ66;K7EN96	Q969V3-2;Q969V3;K7EMW4;A0A0C4DGP7;K7ELZ9;K7ENM2	Nicalin	NCLN			0.121303	0.936641	26	26	26	41.3	62.846	323.31	0.10743	-0.00296053	0.114634	0.266108
Q8WTT2	Q8WTT2	Nucleolar complex protein 3 homolog	NOC3L			0.121277	0.319317	26	26	26	35.6	92.547	161.77	-0.0124972	-0.231532	0.289834	0.439305
J3KNW7;Q9Y592;Q9Y592-2;H0YHH5;F8VYN8;A0A0A0MS84	J3KNW7;Q9Y592;Q9Y592-2	Centrosomal protein of 83 kDa	CEP83			0.121146	0.179579	3	3	3	5.4	82.939	3.2607	0.0459378	0.565792	NaN	-0.248292
P20645;F5GX30;H0YGT2;H0YGE9;H0YF90;F5GXE0;F5GXU0;F5H883	P20645;F5GX30;H0YGT2	Cation-dependent mannose-6-phosphate receptor	M6PR			0.121135	0.305687	6	6	6	25.6	30.993	163	-0.0124972	-0.238783	0.258941	0.47688
X6R700;Q9Y3Y2-4;Q9Y3Y2;Q9Y3Y2-3;A0A087X1B7;Q5T7Y7	X6R700;Q9Y3Y2-4;Q9Y3Y2;Q9Y3Y2-3;A0A087X1B7	Chromatin target of PRMT1 protein	CHTOP			0.121009	0.545054	6	6	6	32.3	23.661	103.47	0.147777	0.355016	0.0766959	-0.0954519
Q2M296-2;Q2M296;H3BUU0;H3BP93;H3BSD1;H3BQU0;Q2M296-4;Q2M296-3;H3BSW8;H3BPD2;H3BVG2;A0A087WX22;H3BNE5;F5H0M7	Q2M296-2;Q2M296;H3BUU0;H3BP93;H3BSD1;H3BQU0;Q2M296-4;Q2M296-3	Methenyltetrahydrofolate synthase domain-containing protein	MTHFSD			0.120909	0.491785	4	4	4	11.5	42.073	37.886	0.305824	0.0413831	NaN	0.01552
Q8IWJ2;B8ZZW2;A0A087WZR8;B8ZZA5;H7BYJ9;U3KPU4;U3KQE0;H7C010	Q8IWJ2;B8ZZW2	GRIP and coiled-coil domain-containing protein 2	GCC2			0.120772	0.559347	55	55	53	37.3	195.91	303.47	-0.0779266	0.0147838	0.304277	0.241953
F5H8H2;Q03426;F5H092;F5GXC0;F5H163;F5H368;A0A0B4J236	F5H8H2;Q03426;F5H092;F5GXC0	Mevalonate kinase	MVK		+	0.120711	1.72695	8	8	8	36	37.171	135.18	0.138029	0.141825	0.0440444	0.158945
J3KPF0;F8VWT9;Q9Y4D8-4;Q9Y4D8;Q9Y4D8-2;Q9Y4D8-3	J3KPF0;F8VWT9;Q9Y4D8-4;Q9Y4D8;Q9Y4D8-2	Probable E3 ubiquitin-protein ligase HECTD4	HECTD4			0.120658	0.840702	11	11	8	3	468.65	15.092	-0.0059029	0.0603242	0.15017	0.278041
A0A087WU02;Q96RQ1;H0YI50;H0YI58;F8VPA6;F8W0R1;F8VR88;F8VUZ2;H0YHS0;H0YHJ8	A0A087WU02;Q96RQ1;H0YI50;H0YI58	Endoplasmic reticulum-Golgi intermediate compartment protein 2	ERGIC2			0.120643	0.265325	8	8	8	27.2	43.432	32.197	0.108083	-0.34183	0.206518	0.5098
O60231;Q5SQH5;A2AB15	O60231	Putative pre-mRNA-splicing factor ATP-dependent RNA helicase DHX16	DHX16			0.120564	0.574757	34	33	33	41.8	119.26	224.89	0.0386731	-0.0883468	0.24062	0.29131
P07602;C9JIZ6;P07602-2;Q5BJH1	P07602;C9JIZ6;P07602-2	Prosaposin;Saposin-A;Saposin-B-Val;Saposin-B;Saposin-C;Saposin-D	PSAP			0.120524	0.118189	19	19	1	31.9	58.112	80.909	-0.451646	-0.54886	0.608147	0.874455
Q9Y6K0;A0A0C4DGS9;F8W1B3;Q8WUD6	Q9Y6K0;A0A0C4DGS9	Choline/ethanolaminephosphotransferase 1	CEPT1			0.120371	0.544344	6	6	6	17.5	46.553	26.757	-0.0556121	-0.0117189	0.212881	0.335936
Q14457;K7ER46;E7EV84;K7ELY9;K7EMA2;K7EN35;K7EQQ7	Q14457;K7ER46;E7EV84	Beclin-1	BECN1			0.120323	0.462759	12	12	12	31.8	51.896	252.75	-0.071488	0.0289935	0.0984196	0.425366
Q5SZL2;Q5SZL2-4;A2A3P3;Q5SZL2-3;Q5SZL2-5;Q5SZL2-2;REV__G3V160;REV__Q969H4-2;REV__Q969H4;E0CX11	Q5SZL2;Q5SZL2-4;A2A3P3	Centrosomal protein of 85 kDa-like	CEP85L			0.120283	0.358966	8	8	8	9.2	91.807	15.43	-0.129877	-0.0844256	0.417272	0.278164
P08567	P08567	Pleckstrin	PLEK			0.120207	0.322274	18	18	18	52.6	40.124	323.31	-0.00388998	-0.226864	0.266397	0.445185
Q9NV66;A0A087WUV9;A0A087WZB2;Q6NUM6;A0A087WWV6;Q6NUM6-2;Q9NV66-2;A0A087X1V1	Q9NV66;A0A087WUV9;A0A087WZB2;Q6NUM6	S-adenosyl-L-methionine-dependent tRNA 4-demethylwyosine synthase	TYW1;TYW1B			0.119951	0.242179	8	8	8	13.3	83.701	35.77	-0.158079	-0.237456	0.323543	0.551797
Q2NL82;I3L1Q5;I3L4E8	Q2NL82	Pre-rRNA-processing protein TSR1 homolog	TSR1			0.119892	0.470732	25	25	25	38.4	91.809	134.56	-0.0043216	-0.107057	0.245861	0.345088
O43676;C9JKQ2	O43676;C9JKQ2	NADH dehydrogenase [ubiquinone] 1 beta subcomplex subunit 3	NDUFB3			0.119886	0.367004	8	8	8	53.1	11.402	13.441	0.0803625	-0.231041	0.256165	0.374056
P30050;P30050-2	P30050;P30050-2	60S ribosomal protein L12	RPL12		+	0.119849	1.35294	12	12	12	73.3	17.818	117.47	0.0656873	0.0646069	0.216238	0.132863
Q6RFH5;Q6RFH5-2;E9PS41;H0YFP2;F5GYL6;F5H0Q8	Q6RFH5;Q6RFH5-2;E9PS41	WD repeat-containing protein 74	WDR74			0.119841	0.580036	22	22	22	60.3	42.441	164.8	0.153944	-0.128219	0.173639	0.280002
P11413;P11413-2;P11413-3;E9PD92	P11413;P11413-2;P11413-3;E9PD92	Glucose-6-phosphate 1-dehydrogenase	G6PD			0.119759	0.819637	46	46	16	92.6	59.256	323.31	-0.0126402	0.0387171	0.233152	0.219807
A0A087WXU0;Q9NWS8;Q5SZ82;Q9NWS8-2	A0A087WXU0;Q9NWS8;Q5SZ82;Q9NWS8-2	Required for meiotic nuclear division protein 1 homolog	RMND1		+	0.119734	1.42055	7	7	7	26.5	32.26	16.556	0.0803166	0.0951818	0.0831111	0.220328
P05388;F8VWS0;P05388-2;F8VW21;F8VU65;F8VPE8;Q8NHW5;G3V210;F8VZS0;F8VQY6;F8VRK7;F8VWV4;F8VS58;F8W1K8	P05388;F8VWS0;P05388-2;F8VW21;F8VU65;F8VPE8;Q8NHW5;G3V210;F8VZS0;F8VQY6;F8VRK7	60S acidic ribosomal protein P0;60S acidic ribosomal protein P0-like	RPLP0;RPLP0P6			0.119619	1.01525	20	20	20	66.2	34.273	281.32	0.0438987	0.0297002	0.237564	0.167313
Q8NB46	Q8NB46	Serine/threonine-protein phosphatase 6 regulatory ankyrin repeat subunit C	ANKRD52			0.119618	0.473527	12	11	11	15.8	115.08	53.925	0.0989845	-0.151939	0.180148	0.351277
P62072	P62072	Mitochondrial import inner membrane translocase subunit Tim10	TIMM10			0.119544	0.505346	6	6	6	58.9	10.333	115.62	0.12312	0.382391	0.064469	-0.0918015
Q9UPU7;Q9UPU7-2;Q9UPU7-3;C9JW56	Q9UPU7;Q9UPU7-2	TBC1 domain family member 2B	TBC1D2B			0.119525	0.279466	18	18	18	21.7	109.88	60.449	-0.255803	-0.0649024	0.36446	0.434344
O75691	O75691	Small subunit processome component 20 homolog	UTP20			0.119515	0.400423	92	92	92	38.7	318.38	323.31	-0.095587	-0.0861091	0.327457	0.332299
Q8N5F7;Q5M9Q1	Q8N5F7	NF-kappa-B-activating protein	NKAP			0.119415	0.198406	3	3	3	12	47.138	11.52	0.52899	0.0234682	NaN	-0.194213
Q9BXK1;A0A087WWX5	Q9BXK1;A0A087WWX5	Krueppel-like factor 16	KLF16			0.119403	0.224501	2	2	2	11.1	25.43	6.2042	0.386827	NaN	-0.251436	0.222818
Q96JM7-2;Q96JM7	Q96JM7-2;Q96JM7	Lethal(3)malignant brain tumor-like protein 3	L3MBTL3			0.119399	0.83124	6	6	6	7.9	85.756	16.055	0.261984	0.0896338	-0.0313562	0.157335
P18077;C9K025;F8WBS5;F8WB72	P18077;C9K025;F8WBS5;F8WB72	60S ribosomal protein L35a	RPL35A			0.119126	0.786124	13	13	13	70.9	12.538	29.604	0.0173294	0.00100953	0.260748	0.197418
Q96JG6;Q96JG6-3;Q96JG6-2;H0Y7Q2;H7BZP1;C9JA29	Q96JG6;Q96JG6-3	Coiled-coil domain-containing protein 132	CCDC132			0.119118	0.582843	25	25	25	30.7	111.17	127.82	-0.0565835	0.0192037	0.329411	0.184441
O00400;H7C562;H7C577	O00400	Acetyl-coenzyme A transporter 1	SLC33A1			0.119084	0.655659	7	7	7	17.9	60.908	24.207	0.296031	-0.0804387	0.11836	0.142385
O43747;O43747-2;H3BNR4;H3BR36;H3BUN9;H3BN71;B4DGE1;H3BRM7;H3BS13;H3BV30;B3KNW1;H3BN75;H3BNN2	O43747;O43747-2	AP-1 complex subunit gamma-1	AP1G1			0.118759	0.964597	35	35	35	56.2	91.35	268.36	-0.00374608	0.0780633	0.239276	0.161443
P18440;F5H5R8	P18440;F5H5R8	Arylamine N-acetyltransferase 1	NAT1			0.11873	0.742503	14	14	14	61.7	33.898	131.59	0.0148784	-0.00685463	0.193204	0.273692
Q13405;H0YDP7;E9PNF1;E9PI78	Q13405;H0YDP7	39S ribosomal protein L49, mitochondrial	MRPL49			0.118685	0.570821	9	9	9	50.6	19.198	49.789	0.0518327	-0.0683018	0.144308	0.346903
Q9BRT9;E5RFF9;E5RH56;Q9BRT9-2	Q9BRT9;E5RFF9	DNA replication complex GINS protein SLD5;DNA replication complex GINS protein SLD5, N-terminally processed;DNA replication complex GINS protein SLD5	GINS4			0.118597	1.11134	10	10	10	55.2	26.047	46.319	0.0289843	0.0590784	0.220082	0.166244
Q96CD2;H3BQB0;H3BRQ0;H3BSE3;Q96CD2-2;H3BU34;H3BU63;H3BPW5	Q96CD2;H3BQB0;H3BRQ0;H3BSE3;Q96CD2-2	Phosphopantothenoylcysteine decarboxylase	PPCDC			0.11856	0.565712	5	5	5	38.2	22.395	18.954	0.0667747	-0.0354018	0.0698396	0.373028
D6RBS5;Q8IZ81;V9GY58;D6RHX2	D6RBS5;Q8IZ81	ELMO domain-containing protein 2	ELMOD2			0.118523	0.320629	7	7	7	33.9	20.204	30.987	-0.140255	-0.0821329	0.198117	0.498362
D6R992;Q01201;D6RIV7	D6R992;Q01201	Transcription factor RelB	RELB			0.118348	0.435504	15	15	15	37	61.776	60.056	0.382871	0.124328	-0.16343	0.129623
C9K0J5;Q70E73;C9J164;Q70E73-5;Q70E73-2;Q70E73-8;Q70E73-7;Q70E73-4;Q70E73-3;Q70E73-9;Q70E73-6	C9K0J5;Q70E73;C9J164;Q70E73-5;Q70E73-2;Q70E73-8;Q70E73-7;Q70E73-4;Q70E73-3;Q70E73-9;Q70E73-6	Ras-associated and pleckstrin homology domains-containing protein 1	RAPH1			0.11824	0.14424	4	3	3	2.8	141.18	3.3129	-0.126444	-0.202937	0.684101	NaN
P49207	P49207	60S ribosomal protein L34	RPL34			0.118218	0.655024	6	6	6	29.9	13.293	13.921	-0.0243196	0.0515809	0.332622	0.11299
Q6ZS81;Q6ZS81-4;Q6ZS81-5;H3BLT2;Q6ZS81-3;Q6ZS81-2;H7BYA1	Q6ZS81;Q6ZS81-4;Q6ZS81-5	WD repeat- and FYVE domain-containing protein 4	WDFY4			0.118126	0.795738	78	78	78	32.6	353.61	323.31	0.267201	0.178109	-0.00639082	0.0335843
P46776;E9PJD9;E9PLL6;E9PLX7	P46776;E9PJD9;E9PLL6	60S ribosomal protein L27a	RPL27A			0.118047	0.889636	6	6	6	35.1	16.561	23.35	0.036733	0.0054719	0.231555	0.198427
Q66GS9;Q66GS9-2	Q66GS9	Centrosomal protein of 135 kDa	CEP135			0.118023	0.421065	26	26	26	27	133.49	116.44	-0.183201	0.0625362	0.311968	0.28079
A0A075B7F8;A8CG34;A0A087WY75;A8CG34-2;Q96HA1;Q96HA1-2;Q96HA1-3;A6NF01;C9JER0;C9J370;Q6PJE2-5;Q6PJE2;C9JFL1;A8MY32	A0A075B7F8;A8CG34;A0A087WY75;A8CG34-2;Q96HA1;Q96HA1-2;Q96HA1-3	Nuclear envelope pore membrane protein POM 121C;Nuclear envelope pore membrane protein POM 121	POM121C;POM121			0.117953	0.393806	17	17	17	19.6	125.09	108.12	0.351295	-0.183589	0.0297002	0.274407
Q99543;Q99543-2;H7C3L7;F2Z3N9;F2Z3H0;C9IZ83	Q99543;Q99543-2	DnaJ homolog subfamily C member 2;DnaJ homolog subfamily C member 2, N-terminally processed	DNAJC2		+	0.117788	1.30422	31	31	31	56.8	71.996	323.31	0.053853	0.0886844	0.223793	0.104821
Q9UHD2;F5H206;F5H1A3;F5GZI4	Q9UHD2	Serine/threonine-protein kinase TBK1	TBK1			0.11736	0.569208	35	35	34	50.3	83.641	212.22	-0.0610158	-0.00218015	0.273814	0.258822
P05387;H0YDD8	P05387	60S acidic ribosomal protein P2	RPLP2			0.117312	0.809819	9	9	8	93	11.665	206.34	-0.0313952	0.0717627	0.253868	0.175012
Q643R3;A0A0C4DGT4;H3BMK4	Q643R3;A0A0C4DGT4	Lysophospholipid acyltransferase LPCAT4	LPCAT4			0.117214	0.120406	5	5	5	15.3	57.218	15.566	-0.682573	1.01006	0.0211954	0.120169
A0A0A0MT60;Q5T1M5;Q5T1M5-2;X6RKW4;Q5T1M5-3	A0A0A0MT60;Q5T1M5;Q5T1M5-2	Peptidyl-prolyl cis-trans isomerase;FK506-binding protein 15	FKBP15			0.117091	1.10035	37	37	37	43.8	136.27	323.31	0.0123299	0.102053	0.230326	0.123654
Q9NZC3;H3BU22;H3BNA5;H3BRL5	Q9NZC3;H3BU22	Glycerophosphodiester phosphodiesterase 1	GDE1			0.117051	0.282276	4	4	4	12.7	37.718	12.443	0.0842879	-0.290056	0.496922	0.17705
P48444;B0YIW6;P48444-2;Q6P1Q5;E9PK34	P48444;B0YIW6;P48444-2	Coatomer subunit delta	ARCN1		+	0.117045	2.15627	39	39	39	61.6	57.21	323.31	0.0721642	0.116631	0.158337	0.121047
P04843;B7Z4L4;F8WF32	P04843;B7Z4L4	Dolichyl-diphosphooligosaccharide--protein glycosyltransferase subunit 1	RPN1			0.11685	0.635939	47	47	47	77.9	68.569	323.31	0.303419	0.0618453	-0.0642537	0.166389
F8VX04;Q9H2H9;F8VX12	F8VX04;Q9H2H9;F8VX12	Sodium-coupled neutral amino acid transporter 1	SLC38A1			0.11683	0.188563	8	8	8	14.1	56.195	20.674	-0.369159	-0.184441	0.46999	0.55093
Q9NY61;A0A087WWS8;A0A087WTH8	Q9NY61	Protein AATF	AATF			0.11668	0.587376	19	19	19	46.6	63.132	174.87	-0.0526941	-0.00215121	0.251689	0.269877
P21912;A0A087WWT1;A0A087WXX8	P21912;A0A087WWT1;A0A087WXX8	Succinate dehydrogenase [ubiquinone] iron-sulfur subunit, mitochondrial	SDHB			0.11667	0.707872	20	20	20	55.7	31.629	149.85	-0.00676469	0.000144286	0.206393	0.266906
Q15121;Q15121-2;B1AKZ5	Q15121;Q15121-2;B1AKZ5	Astrocytic phosphoprotein PEA-15	PEA15			0.116653	0.509225	8	8	8	72.3	15.04	84.976	0.00721706	0.123931	0.382723	-0.0472592
Q9HAB8;Q9HAB8-2;Q5VVM3	Q9HAB8;Q9HAB8-2	Phosphopantothenate--cysteine ligase	PPCS		+	0.116519	1.53149	15	15	15	48.2	34.005	65.416	0.0577971	0.198368	0.0961269	0.113785
O60524-4;O60524-3;O60524;G3V5V3;O60524-5;G3V4D9;G3V547;O60524-2	O60524-4;O60524-3;O60524;G3V5V3;O60524-5	Nuclear export mediator factor NEMF	NEMF			0.116452	0.964974	28	28	28	30.9	118.02	143.25	0.023299	0.0618453	0.122739	0.257925
P42677;C9J1C5;Q5T4L4	P42677;C9J1C5;Q5T4L4	40S ribosomal protein S27	RPS27;RPS27L			0.116436	0.558051	6	1	1	42.9	9.461	4.5361	0.149985	-0.100391	0.090718	0.325431
Q9NWT6;E9PL41	Q9NWT6	Hypoxia-inducible factor 1-alpha inhibitor	HIF1AN			0.116334	0.205231	6	6	6	32.1	40.285	23.874	-0.0546401	-0.407861	0.451963	0.475876
B3KY94;O14735-3;O14735;H3BUR9	B3KY94;O14735-3;O14735;H3BUR9	CDP-diacylglycerol--inositol 3-phosphatidyltransferase	CDIPT			0.116207	0.314937	2	2	2	8.9	25.946	5.3657	NaN	-0.0384359	0.388355	-0.00129785
P61247;D6RAT0;D6RG13;H0Y8L7;E9PFI5;H0Y9Y4;D6RB09;D6R9B6;D6RAS7;D6RI02;D6RED7;D6RGE0	P61247;D6RAT0;D6RG13;H0Y8L7;E9PFI5;H0Y9Y4;D6RB09;D6R9B6	40S ribosomal protein S3a	RPS3A			0.116065	0.673935	27	27	27	65.5	29.945	323.31	-0.0126402	0.00288247	0.291721	0.182295
Q9BX68	Q9BX68	Histidine triad nucleotide-binding protein 2, mitochondrial	HINT2			0.115757	0.474645	9	9	9	62	17.162	190.1	0.0112535	-0.0908644	0.169797	0.372841
Q8IZ73;Q8IZ73-2;A0A087WXE2	Q8IZ73;Q8IZ73-2	RNA pseudouridylate synthase domain-containing protein 2	RPUSD2			0.115634	1.09575	19	19	19	42.9	61.311	78.639	0.232176	0.0339339	0.0606008	0.135824
A0A0A0MSJ9;Q15283-2;Q15283	A0A0A0MSJ9;Q15283-2;Q15283	Ras GTPase-activating protein 2	RASA2			0.115554	0.934429	17	17	17	21.9	96.999	31.571	0.076326	-0.0107447	0.164915	0.231718
Q96CG3	Q96CG3	TRAF-interacting protein with FHA domain-containing protein A	TIFA			0.115364	0.53087	11	11	11	46.2	21.445	153.91	-0.013498	-0.0323592	0.146916	0.360397
P61020;P61020-2;F8VUA5	P61020;P61020-2	Ras-related protein Rab-5B	RAB5B			0.115281	0.497423	9	6	6	60.5	23.707	58.258	0.230753	-0.126612	0.0521377	0.304844
P51798-2;P51798;H0Y2M6;I3L470;H3BNG8	P51798-2;P51798;H0Y2M6	H(+)/Cl(-) exchange transporter 7	CLCN7			0.115255	0.927298	7	7	7	9	86.025	6.5696	0.250131	0.126312	-0.0068256	0.0914023
Q9H6F5;Q9H6F5-2;H0YG79	Q9H6F5	Coiled-coil domain-containing protein 86	CCDC86			0.115207	0.356554	19	19	19	50.6	40.235	160.65	0.109701	-0.214408	0.146395	0.419141
Q86YT6	Q86YT6	E3 ubiquitin-protein ligase MIB1	MIB1			0.115146	0.305812	11	11	11	13.2	110.13	31.014	-0.0669503	-0.192052	0.266877	0.452708
Q05655;Q05655-2;C9K0E3;C9J9P1;C9JZU8	Q05655;Q05655-2	Protein kinase C delta type;Protein kinase C delta type regulatory subunit;Protein kinase C delta type catalytic subunit	PRKCD			0.11513	0.360144	28	28	27	49.1	77.504	135.83	-0.142217	0.000721115	0.458802	0.143213
E7ET07;Q9NXR8	E7ET07;Q9NXR8	Inhibitor of growth protein;Inhibitor of growth protein 3	ING3			0.115034	0.304789	3	3	3	10.7	44.86	15.461	0.381367	0.052555	NaN	-0.0888201
P62241;Q5JR95	P62241;Q5JR95	40S ribosomal protein S8	RPS8			0.114751	0.773695	20	20	20	62.5	24.205	323.31	0.0279102	-0.0156805	0.213378	0.233397
Q8IUI8-2	Q8IUI8-2	Cytokine receptor-like factor 3	CRLF3			0.114593	0.371592	17	17	1	48.2	49.35	286.8	-0.0652966	-0.131645	0.295841	0.359472
Q9HB07;F8VQQ3;F8VR84;H3BPH3	Q9HB07;F8VQQ3;F8VR84	UPF0160 protein MYG1, mitochondrial	C12orf10		+	0.114561	2.8098	16	16	16	51.9	42.449	213.78	0.128503	0.100978	0.0932897	0.135475
Q92820	Q92820	Gamma-glutamyl hydrolase	GGH			0.114471	0.290806	15	15	15	46.5	35.964	142	-0.0798389	-0.204167	0.284988	0.4569
Q5QPA5;Q9NVS2;Q9NVS2-2;Q9NVS2-3	Q5QPA5;Q9NVS2;Q9NVS2-2;Q9NVS2-3	28S ribosomal protein S18a, mitochondrial	MRPS18A			0.11439	0.310869	8	8	8	31.8	29.714	29.412	0.0964063	-0.256614	0.167486	0.450282
G5EA36;I3L328	G5EA36		CDC27			0.11434	0.316672	25	1	1	43.5	91.737	2.7915	-0.10675	-0.15388	0.31034	0.407651
H3BSG0;Q9BSU1-2;Q9BSU1;H3BRA5;H3BS58	H3BSG0;Q9BSU1-2;Q9BSU1	UPF0183 protein C16orf70	C16orf70			0.114235	0.191734	3	3	3	15.9	35.989	9.8949	-0.287709	-0.231752	0.359521	0.616879
G3V1A6;P57764;E9PIB2;E9PNZ0;E9PQR9;E9PQ48;E9PRF1	G3V1A6;P57764;E9PIB2	Gasdermin-D	GSDMD			0.114224	0.530135	15	15	15	44.4	57.734	164.21	-0.0601858	-0.00673869	0.329296	0.194526
E9PL01;A0A087WUC6;Q15005;E9PI68;E9PRB9;H0YE04	E9PL01;A0A087WUC6;Q15005;E9PI68;E9PRB9	Signal peptidase complex subunit 2	SPCS2			0.114202	0.407175	10	10	10	58	17.027	187.73	0.104294	-0.184228	0.167743	0.368998
O00743;O00743-3;O00743-2;Q5T1S7	O00743;O00743-3;O00743-2	Serine/threonine-protein phosphatase 6 catalytic subunit;Serine/threonine-protein phosphatase 6 catalytic subunit, N-terminally processed	PPP6C			0.114126	0.596071	15	15	15	63	35.144	126.15	-0.0399806	-0.0103233	0.271306	0.235501
Q9Y617	Q9Y617	Phosphoserine aminotransferase	PSAT1			0.114034	0.297616	27	27	3	73.8	40.422	304.58	-0.269273	0.181929	0.459956	0.0835233
Q14161;Q14161-5;Q14161-3;Q14161-9;Q14161-8;R4GNG3;Q14161-4;F8VXI9;F8WAK2;Q14161-10;Q14161-7;Q14161-11;Q14161-6;Q14161-2;F8W822	Q14161;Q14161-5;Q14161-3;Q14161-9;Q14161-8;R4GNG3;Q14161-4;F8VXI9;F8WAK2;Q14161-10;Q14161-7;Q14161-11;Q14161-6;Q14161-2;F8W822	ARF GTPase-activating protein GIT2	GIT2		+	0.114034	1.30975	33	33	30	58.2	84.542	217.47	0.0151846	0.116365	0.181293	0.143293
A0A087WW39;P55198;A0A087WVY1	A0A087WW39;P55198	Protein AF-17	MLLT6			0.113928	0.191275	5	4	4	5.6	112.05	3.1829	-0.214498	0.0478175	NaN	0.508465
P52594-2;P52594-3;P52594;P52594-4;B8ZZY2;C9J2I0	P52594-2;P52594-3;P52594;P52594-4;B8ZZY2;C9J2I0	Arf-GAP domain and FG repeat-containing protein 1	AGFG1			0.113859	0.867933	13	13	13	34.7	54.181	152.75	-0.0354831	0.0930192	0.181802	0.216099
Q86TI0;Q86TI0-2;H0Y8P0;C9JIE2;A0JNU9;H0YA01;H7C380;B5MCJ2;H7C0Z7	Q86TI0;Q86TI0-2;H0Y8P0	TBC1 domain family member 1	TBC1D1			0.113766	1.24527	39	37	37	39.2	133.08	192.89	0.0589838	0.207768	0.141302	0.0470105
Q6Y1H2	Q6Y1H2	Very-long-chain (3R)-3-hydroxyacyl-CoA dehydratase 2	HACD2			0.113739	0.733359	2	2	2	7.5	28.368	4.6576	0.087948	-0.0471297	0.140779	0.273361
O95822-2;O95822	O95822-2;O95822	Malonyl-CoA decarboxylase, mitochondrial	MLYCD			0.113739	0.321239	12	12	12	31.9	50.945	54.47	0.145158	-0.236554	0.0969364	0.449415
Q7L7X3;Q7L7X3-3;Q7L7X3-2;J3QS76	Q7L7X3;Q7L7X3-3;Q7L7X3-2	Serine/threonine-protein kinase TAO1	TAOK1			0.113698	0.988187	16	11	11	15.6	116.07	36.313	0.12301	0.147697	0.207268	-0.0231843
Q9UKK9;A6NFX8;A6NJU6;A6NCQ0;C9JYY9;H0YEY4	Q9UKK9;A6NFX8;A6NJU6	ADP-sugar pyrophosphatase	NUDT5		+	0.11363	1.8545	16	16	16	73.1	24.327	106.32	0.0632886	0.134878	0.162597	0.0937559
F8VY35;F5H4R6;P55209-2;P55209;F8VUX1;F8W0J6;H0YIV4;F8W020;F8VXI6;F8VVB5;H0YH88;H0YHC3;B7Z4K9	F8VY35;F5H4R6;P55209-2;P55209;F8VUX1;F8W0J6;H0YIV4;F8W020;F8VXI6	Nucleosome assembly protein 1-like 1	NAP1L1			0.113357	0.480041	17	17	6	79.5	31.02	323.31	-0.00302645	-0.0993708	0.311619	0.244207
A0A0G2JN29;A0A087X117;Q15155;A0A0G2JP90;A0A087WW46;H3BUC9;I3L0Q6;H3BTW1	A0A0G2JN29;A0A087X117;Q15155;A0A0G2JP90;A0A087WW46	Nodal modulator 1	NOMO1			0.113237	0.234583	53	2	2	57.7	139.54	45.782	-0.0816123	-0.0397848	0.461109	NaN
O94768;C9JZJ1;U3KQF8	O94768	Serine/threonine-protein kinase 17B	STK17B			0.113224	1.15631	8	8	8	23.7	42.344	22.848	0.185491	0.0614305	0.180403	0.0255735
O14545;F8VNX8;F8VVF3;O14545-2;F8VWK2;S4R2Z9	O14545;F8VNX8	TRAF-type zinc finger domain-containing protein 1	TRAFD1			0.113221	0.658679	10	10	10	22.9	64.84	41.428	-0.081885	0.153805	0.269751	0.111212
Q9UKV8;Q9UKV8-2	Q9UKV8;Q9UKV8-2	Protein argonaute-2	AGO2			0.113155	0.43718	28	22	21	37.6	97.207	96.779	-0.0771063	-0.0627159	0.32458	0.267861
Q14289;Q14289-2;E9PBI4;C9JHV9;E5RJ77;E5RK84;E5RHL2;H0YB74	Q14289;Q14289-2	Protein-tyrosine kinase 2-beta	PTK2B			0.112912	0.3611	45	45	44	52.3	115.87	257.39	-0.0848807	-0.124031	0.330329	0.33023
S4R400	S4R400		FOCAD			0.112803	0.585378	16	1	1	14.7	136.37	20.44	-0.0147838	0.236095	NaN	0.117099
E9PMJ2;J3KP39;Q9BPY3;G3V179;E9PIM5;E9PMW3	E9PMJ2;J3KP39;Q9BPY3;G3V179;E9PIM5	Protein FAM118B	FAM118B			0.112791	1.16811	9	9	9	25.6	39.136	20.983	0.0476515	0.0453032	0.148348	0.209862
Q9H1I8;Q9H1I8-3;B1AH59;Q9H1I8-2;F2Z2W4;F8WAQ6	Q9H1I8;Q9H1I8-3	Activating signal cointegrator 1 complex subunit 2	ASCC2			0.112788	0.447841	17	17	17	26.8	86.359	70.214	0.00881294	-0.0746689	0.115699	0.401311
Q96K31;Q96EF9	Q96K31;Q96EF9	Uncharacterized protein C8orf76;Zinc fingers and homeoboxes protein 1, isoform 2	C8orf76;ZHX1-C8orf76			0.112607	0.141445	3	3	3	12.6	43.273	23.282	-0.0775164	-0.239583	NaN	0.654922
P62081;B5MCP9	P62081;B5MCP9	40S ribosomal protein S7	RPS7			0.112444	0.691102	17	17	17	75.8	22.127	323.31	0.0455952	-0.0511899	0.227002	0.228368
Q7L1V2;E7EW32;Q7L1V2-2;H3BUX9;H3BR21	Q7L1V2;E7EW32;Q7L1V2-2	Vacuolar fusion protein MON1 homolog B	MON1B			0.112307	0.428995	16	16	16	34.2	59.217	76.3	0.0741526	-0.165078	0.198871	0.341281
Q14687-2;Q14687-3;Q14687;H0Y613;H7C3B5;C9JLW9	Q14687-2;Q14687-3;Q14687;H0Y613	Genetic suppressor element 1	GSE1			0.112263	0.670705	21	21	21	25.9	125.84	102.37	-0.0551957	0.0426443	0.227988	0.233617
Q13287;C9JW17	Q13287	N-myc-interactor	NMI			0.112255	0.380431	17	17	17	56.4	35.056	79.953	-0.11703	-0.0688011	0.344828	0.290021
A0A0A0MTI2;O14492;C9JK89	A0A0A0MTI2;O14492;C9JK89	SH2B adapter protein 2	SH2B2			0.111989	0.574534	17	17	17	31.3	72.286	145.57	0.296988	0.021764	-0.066231	0.195434
O43399-2;O43399-4;O43399-3;O43399-6	O43399-2;O43399-4;O43399-3;O43399-6	Tumor protein D54	TPD52L2			0.111965	0.208423	14	2	2	81.7	19.901	6.9618	-0.00374608	0.486972	-0.14733	NaN
E9PS74;Q8NBI5;Q8NBI5-2;H0YD64	E9PS74;Q8NBI5;Q8NBI5-2;H0YD64	Solute carrier family 43 member 3	SLC43A3			0.111601	0.29755	5	5	5	14.5	36.797	73.478	-0.0600475	-0.210162	0.413161	0.303454
A0A087X1G7;A0A0B4J1S4;O60613;A0A087WXL0;A0A0B4J1T0;A8MZD0;O60613-2	A0A087X1G7;A0A0B4J1S4;O60613	15 kDa selenoprotein	2016-09-15		+	0.11115	1.71023	5	5	5	31.1	17.942	36.415	0.141446	0.146395	0.115433	0.0413281
Q06187;Q06187-2;U3NG26;Q5JY90;J3KR66;F8W9W0;C9JXA2;Q96L35;B1AKC9;F8VP57;B7ZKW7;B7ZKJ3;A0A0B4J1T8;Q9UF33-2;Q9UF33-3;P54762-5;P54756-3;P29317;P29320;P54762;P29323-2;P54760;P29323-3;P54753;P29322;P54756-2;Q9UF33;P54756;P29323	Q06187;Q06187-2;U3NG26;Q5JY90	Tyrosine-protein kinase BTK;Non-specific protein-tyrosine kinase	BTK			0.111108	1.24338	45	45	44	71.9	76.28	267.76	0.0926017	0.0149266	0.177216	0.159686
P38935;H3BRR1;F5GX64;F5H5K3	P38935	DNA-binding protein SMUBP-2	IGHMBP2			0.110842	0.188042	9	9	9	12.1	109.15	22.127	-0.119688	-0.075444	NaN	0.527658
O95365	O95365	Zinc finger and BTB domain-containing protein 7A	ZBTB7A			0.110723	0.202306	6	6	6	17.6	61.438	25.683	0.202522	-0.263663	NaN	0.393311
O95478;A0A0A0MQZ6;H0YAI9	O95478;A0A0A0MQZ6	Ribosome biogenesis protein NSA2 homolog	NSA2			0.110581	0.545962	14	14	14	51.5	30.065	44.686	0.182049	-0.0775129	0.0282862	0.309503
Q13445;K7EIN4;K7EQ63	Q13445	Transmembrane emp24 domain-containing protein 1	TMED1			0.110426	0.620874	3	3	3	17.2	25.206	39.384	0.139109	0.158208	-0.104217	0.248605
Q9P0I2;Q9P0I2-2;C9JLM9;S4R3U9	Q9P0I2;Q9P0I2-2	ER membrane protein complex subunit 3	EMC3			0.110023	0.528432	13	13	13	50.6	29.952	100.33	0.102326	-0.0284841	0.00805652	0.358195
Q15042;Q15042-3;Q15042-4;C9J1R5	Q15042;Q15042-3;Q15042-4	Rab3 GTPase-activating protein catalytic subunit	RAB3GAP1			0.109892	0.339304	51	51	51	60.9	110.52	323.31	-0.10916	-0.118633	0.32262	0.34474
Q14197;J3KS15;J3QRF8	Q14197;J3KS15	Peptidyl-tRNA hydrolase ICT1, mitochondrial	ICT1			0.109876	0.446888	14	14	14	52.9	23.63	64.59	0.0833094	-0.151106	0.173255	0.334043
F5GYQ1;P61421;R4GN72;J3QL14;H3BQJ1;H3BQB4;H3BSG7	F5GYQ1;P61421;R4GN72;J3QL14	V-type proton ATPase subunit d 1	ATP6V0D1			0.109548	0.501727	13	13	13	39.8	44.659	157.28	0.148657	-0.138203	0.128161	0.299578
Q9BRG1;K7EKV4;K7ENE3;K7EP45	Q9BRG1;K7EKV4;K7ENE3	Vacuolar protein-sorting-associated protein 25	VPS25			0.109438	0.371493	15	15	15	79	20.747	116.57	-0.0318186	-0.151971	0.320543	0.300999
Q8NEZ2;Q8NEZ2-2;H0YBN0;E5RG91;Q8NEZ2-3;E5RJ10;E5RHB8;E5RJX6	Q8NEZ2;Q8NEZ2-2;H0YBN0;E5RG91	Vacuolar protein sorting-associated protein 37A	VPS37A			0.109229	1.2659	10	10	10	36	44.314	68.607	0.0358749	0.0799754	0.203013	0.118054
Q86W56-3;Q86W56-2;Q86W56;Q86W56-5	Q86W56-3;Q86W56-2;Q86W56;Q86W56-5	Poly(ADP-ribose) glycohydrolase	PARG			0.109142	0.350915	16	16	7	19.9	99.431	67.735	0.00901616	0.00619029	0.480162	-0.0588014
Q99707;Q99707-2;B1ANE3	Q99707;Q99707-2;B1ANE3	Methionine synthase	MTR			0.108852	0.370558	18	18	18	18.5	140.53	58.414	-0.033934	-0.143883	0.25181	0.361416
P07237;H7BZ94;H0Y3Z3;I3L398;I3L312;I3L0S0;I3L4M2;I3NI03;I3L3P5;I3L3U6;I3L514;I3L1Y5	P07237;H7BZ94;H0Y3Z3	Protein disulfide-isomerase	P4HB			0.108594	0.438799	44	44	44	79.7	57.116	323.31	0.106482	-0.138426	0.106348	0.359971
Q7Z6J8;D6RHY9;D6RD24;H0Y359	Q7Z6J8;D6RHY9;D6RD24	E3 ubiquitin-protein ligase E3D	UBE3D			0.108336	0.829951	3	3	3	9.5	43.656	3.3625	-0.0588014	0.169925	0.151599	0.170621
Q92466;A0A087X0X5;Q92466-2;Q92466-5;Q92466-4;A0A087WYT8;A0A087WW71;Q92466-3;A0A087WTQ7;A0A087WV56	Q92466;A0A087X0X5;Q92466-2;Q92466-5;Q92466-4	DNA damage-binding protein 2	DDB2			0.10832	0.989677	5	5	5	15	47.863	13.275	-0.0265876	0.162597	0.120352	0.176919
Q6P4R8-3;Q6P4R8;Q6P4R8-2;E9PQ59;E9PQB0;E9PJU3;E9PJG2	Q6P4R8-3;Q6P4R8;Q6P4R8-2;E9PQ59	Nuclear factor related to kappa-B-binding protein	NFRKB			0.108251	0.47117	18	18	18	19.9	138.87	65.809	-0.0419438	-0.0543923	0.337882	0.191458
K7ELL7;P14314-2;P14314;K7EPW7;K7EKX1;K7EJ70;A0A0C4DGP4;K7EIP3	K7ELL7;P14314-2;P14314	Glucosidase 2 subunit beta	PRKCSH			0.108174	0.536903	27	27	27	46.7	60.192	323.31	0.205164	-0.0980885	0.0450235	0.280597
Q4V328;A0A075B793;Q4V328-4;A0A087WT45;Q4V328-2;Q4V328-3;A0A087WXA6;A0A087WW92;A0A087WV84	Q4V328;A0A075B793;Q4V328-4;A0A087WT45;Q4V328-2;Q4V328-3	GRIP1-associated protein 1	GRIPAP1			0.108131	0.401127	42	42	37	61.4	95.988	323.31	-0.166073	0.0618453	0.35727	0.179482
Q9BWH6;Q9BWH6-2;H3BRE8;Q9BWH6-3;H3BPM3;H3BPY8;H3BTJ6	Q9BWH6;Q9BWH6-2;H3BRE8	RNA polymerase II-associated protein 1	RPAP1			0.108082	0.434368	20	20	20	17.5	152.75	87.442	0.0916328	-0.159992	0.170694	0.329994
Q86YS7;Q86YS7-3;Q86YS7-2;Q86YS7-4;Q86YS7-5;H0YFE9;H0YFC4	Q86YS7;Q86YS7-3;Q86YS7-2;Q86YS7-4;Q86YS7-5	C2 domain-containing protein 5	C2CD5			0.107988	0.375551	22	22	22	26.1	110.45	80.989	-0.0281449	-0.148897	0.31429	0.294703
Q9UHG3;F8W8W4;Q9UHG3-2;C9K055;C9JM55;C9JGT6	Q9UHG3;F8W8W4;Q9UHG3-2;C9K055	Prenylcysteine oxidase 1	PCYOX1			0.107983	0.253991	9	9	9	25.5	56.639	58.368	-0.030548	-0.290074	0.353888	0.398665
O43447;C9JQD4;O43447-2;H0YEL5;A6NM32	O43447;C9JQD4;O43447-2;H0YEL5	Peptidyl-prolyl cis-trans isomerase H;Peptidyl-prolyl cis-trans isomerase	PPIH		+	0.107982	3.08077	14	14	14	80.8	19.208	165.29	0.090634	0.114367	0.126444	0.100484
Q8N573-2;Q8N573-5;Q8N573-8;Q8N573;Q8N573-3;H0YC07;Q8N573-7;Q8N573-4;E5RII8;Q8N573-6;E9PLW2	Q8N573-2;Q8N573-5;Q8N573-8;Q8N573;Q8N573-3;H0YC07	Oxidation resistance protein 1	OXR1			0.10791	0.211305	11	11	11	22.3	93.733	38.556	0.12926	-0.356994	0.0736831	0.585691
A0A0C4DGQ5;P04632;K7ELJ7;A0A075B7C0;U3KQE2;K7EKD8;K7EM73;K7EIV0;U3KPR7;K7EMQ1;K7ES78;Q96L46	A0A0C4DGQ5;P04632;K7ELJ7;A0A075B7C0;U3KQE2;K7EKD8;K7EM73;K7EIV0	Calpain small subunit 1	CAPNS1			0.107819	0.621376	18	18	18	70.8	33.786	244.78	-0.0382958	0.00158601	0.249991	0.217994
Q9Y5T5;Q9Y5T5-4;Q9Y5T5-5;H9KVB6	Q9Y5T5;Q9Y5T5-4	Ubiquitin carboxyl-terminal hydrolase 16	USP16			0.107375	1.1227	21	21	1	33.4	93.569	85.41	0.026837	0.0500489	0.181929	0.170686
Q9HD15;R4GMW4	Q9HD15	Steroid receptor RNA activator 1	SRA1			0.107287	0.807032	12	12	12	52.5	25.673	199.41	-0.00848689	0.0418037	0.149129	0.246704
O43572;E7EMD6;J3QR74;J3QL61	O43572;E7EMD6	A-kinase anchor protein 10, mitochondrial	AKAP10			0.107282	0.096134	7	7	7	15.1	73.817	14.626	-0.782828	-0.112288	1.09518	0.229061
Q9P2D3;Q9P2D3-3;Q9P2D3-2;H7C2X3	Q9P2D3;Q9P2D3-3	HEAT repeat-containing protein 5B	HEATR5B			0.107207	0.562368	46	46	46	31.6	224.3	273.79	0.00475436	-0.0633338	0.228603	0.258805
P15880;H0YEN5;I3L404;E9PMM9;E9PQD7;E9PM36;E9PPT0;H3BNG3;H0YE27	P15880;H0YEN5;I3L404;E9PMM9;E9PQD7;E9PM36;E9PPT0	40S ribosomal protein S2	RPS2			0.107108	0.737008	21	21	21	61.1	31.324	153.33	-0.0092038	0.0123541	0.240497	0.184785
Q9UBZ4	Q9UBZ4	DNA-(apurinic or apyrimidinic site) lyase 2	APEX2			0.10706	0.252872	3	3	3	7.9	57.4	6.2414	0.393008	-0.134604	NaN	0.0627761
P05386;P05386-2	P05386	60S acidic ribosomal protein P1	RPLP1			0.107042	0.900527	4	3	3	89.5	11.514	274.63	0.0252357	0.0137839	0.206018	0.18313
Q9C0B5-2;Q9C0B5;H0YEF4	Q9C0B5-2;Q9C0B5;H0YEF4	Palmitoyltransferase ZDHHC5;Palmitoyltransferase	ZDHHC5			0.106956	0.388613	9	9	9	19.9	71.951	37.169	-0.123004	-0.032979	0.357721	0.226088
Q9Y248;M0QXS3;M0R043	Q9Y248	DNA replication complex GINS protein PSF2	GINS2			0.106882	0.552801	8	8	8	57.3	21.427	53.349	-0.0224744	-0.0137274	0.323428	0.140301
Q9NPA0;H0YDX2;H0YDT8	Q9NPA0;H0YDX2;H0YDT8	ER membrane protein complex subunit 7	EMC7			0.106753	0.274194	9	9	9	47.1	26.47	45.516	0.293748	-0.229349	-0.0600062	0.422617
C9JP00;A0A0A0MQX8;Q9NR56;Q9NR56-7;Q86VM6;C9J4T8;C9JCX1;H7C4Y1	C9JP00;A0A0A0MQX8;Q9NR56;Q9NR56-7;Q86VM6	Muscleblind-like protein 1	MBNL1			0.106536	0.525082	12	12	2	42.5	37.898	116.39	-0.0192036	-0.0578271	0.223052	0.280124
Q7Z2E3-7;Q7Z2E3;Q7Z2E3-9;Q7Z2E3-11;Q7Z2E3-8;A0A0A0MRW7;Q7Z2E3-5;Q7Z2E3-10;C9JZ40;Q7Z2E3-4;Q7Z2E3-3;F8W6G5;Q7Z2E3-13;C9J8U3;Q7Z2E3-2;Q7Z2E3-6;F8WBD6;E7EUY4;F8WBM3;Q6JV79;E7EVB7;Q7Z2E3-12	Q7Z2E3-7;Q7Z2E3;Q7Z2E3-9;Q7Z2E3-11;Q7Z2E3-8;A0A0A0MRW7;Q7Z2E3-5;Q7Z2E3-10;C9JZ40;Q7Z2E3-4;Q7Z2E3-3;F8W6G5;Q7Z2E3-13	Aprataxin	APTX			0.10641	0.519774	9	9	9	33.9	39.104	30.243	0.000793654	-0.076828	0.223546	0.278129
E5RI99;P62888;A0A0B4J213;A0A0C4DH44;E5RJH3	E5RI99;P62888	60S ribosomal protein L30	RPL30			0.106324	0.772857	8	8	8	61.4	12.656	203.25	-0.0319598	0.0852886	0.254352	0.117615
J3QR09;J3KTE4;P84098;J3QL15	J3QR09;J3KTE4;P84098	Ribosomal protein L19;60S ribosomal protein L19	RPL19			0.106243	0.74068	16	16	16	43	23.134	58.692	-0.0405417	0.0592169	0.239276	0.167021
Q8TCT9-5;Q8TCT9;A0A075B6F6;A0A0C4DGU3	Q8TCT9-5;Q8TCT9;A0A075B6F6	Minor histocompatibility antigen H13	HM13			0.106198	0.286787	8	8	2	26	36.813	71.656	0.43692	-0.138061	-0.135966	0.261898
Q8IV04;E9PSB7	Q8IV04	Carabin	TBC1D10C			0.106085	0.539116	10	10	10	29.4	49.712	63.613	0.0194774	-0.0651439	0.158466	0.311542
P21796;C9JI87	P21796;C9JI87	Voltage-dependent anion-selective channel protein 1	VDAC1		+	0.105909	1.63469	25	25	25	88	30.772	323.31	0.0925709	0.0721745	0.0801119	0.17878
Q9ULG6-2;Q9ULG6;Q9ULG6-5;Q9ULG6-4;Q9ULG6-3	Q9ULG6-2;Q9ULG6;Q9ULG6-5;Q9ULG6-4	Cell cycle progression protein 1	CCPG1			0.105876	0.165622	3	3	3	7.2	71.853	7.356	0.0849303	-0.271096	NaN	0.503793
P49917;A0A0C4DGV9	P49917;A0A0C4DGV9	DNA ligase 4;DNA ligase	LIG4		+	0.105863	1.70136	32	32	32	41.4	103.97	127.02	0.172132	0.0806577	0.0676387	0.103023
O75157-2;O75157	O75157-2;O75157	TSC22 domain family protein 2	TSC22D2			0.105853	0.494987	4	1	1	4.6	76.391	2.8547	0.202638	0.169284	NaN	-0.0543624
F8VNT9;F8VV56;F8W022;F8VWK8;P08962-3;P08962-2;P08962	F8VNT9;F8VV56;F8W022;F8VWK8;P08962-3;P08962-2;P08962	Tetraspanin;CD63 antigen	CD63			0.105827	0.204718	2	2	2	13.5	14.265	3.9627	-0.128162	-0.287026	0.574538	0.263958
Q8TB37;F8W0A2;H0YHR7;F8W061;Q8TB37-2;F8VP02;F8VZR8	Q8TB37;F8W0A2	Iron-sulfur protein NUBPL	NUBPL			0.105825	0.2664	5	5	5	20.4	34.082	12.552	0.201543	-0.0132905	-0.243882	0.478929
P62269;J3JS69;A0A0G2JQH2;Q5GGW2	P62269	40S ribosomal protein S18	RPS18			0.105803	0.803022	15	15	15	55.3	17.718	85.14	-0.0123541	0.0565835	0.251931	0.127053
Q6DKI1;R4GMU7;Q6DKI1-2	Q6DKI1;R4GMU7;Q6DKI1-2	60S ribosomal protein L7-like 1	RPL7L1			0.105733	0.452503	14	14	14	50.8	28.661	58.006	0.198676	-0.150161	0.0775164	0.296899
D3YTB1;F8W727;P62910;D3YTI8	D3YTB1;F8W727;P62910	60S ribosomal protein L32	RPL32			0.10564	0.725261	11	11	11	59.4	15.616	76.643	-0.0127833	0.0321009	0.267356	0.135887
Q9BRP8;Q9BRP8-2	Q9BRP8;Q9BRP8-2	Partner of Y14 and mago	WIBG			0.105616	0.447196	11	11	11	70.6	22.655	205.68	0.318038	0.221939	-0.0799201	-0.0375931
Q32NB8;Q32NB8-2;K7ELT9;Q32NB8-3;K7EJP6;K7EL44;K7EPX0	Q32NB8;Q32NB8-2;K7ELT9;Q32NB8-3;K7EJP6;K7EL44	CDP-diacylglycerol--glycerol-3-phosphate 3-phosphatidyltransferase, mitochondrial	PGS1			0.105235	0.376322	9	9	9	24.1	62.73	16.39	0.144616	-0.116238	-0.0111518	0.403714
Q9H993;F5GZY1	Q9H993;F5GZY1	Protein-glutamate O-methyltransferase	ARMT1			0.105085	0.85532	17	17	17	48.1	51.172	156.37	-0.033652	0.0844725	0.204892	0.164626
Q8TAE8	Q8TAE8	Growth arrest and DNA damage-inducible proteins-interacting protein 1	GADD45GIP1			0.105015	0.366232	8	8	8	40.5	25.384	28.929	0.221943	-0.226628	0.130535	0.294208
Q6NXE6-2;Q6NXE6;B4E1N1;F5H4P3;F5GWV0;H0YH65;H0YGL0;F5H2X2;F5H2K4;F5H052;F5H3X1;F5H6J3;F5GZP0;H0YGQ5;F5H7V0	Q6NXE6-2;Q6NXE6;B4E1N1;F5H4P3	Armadillo repeat-containing protein 6	ARMC6			0.104958	0.606417	23	23	23	56.9	51.547	156.78	-0.0440444	0.00805652	0.264116	0.191706
E7ETK0;A0A087WUS0;P62847-2;P62847-3;P62847;P62847-4	E7ETK0;A0A087WUS0;P62847-2;P62847-3;P62847;P62847-4	40S ribosomal protein S24	RPS24			0.104943	0.529144	4	4	4	35.1	15.197	29.618	0.0454314	-0.0922017	0.294312	0.17223
P62851	P62851	40S ribosomal protein S25	RPS25			0.104904	0.762969	5	5	5	29.6	13.742	10.482	0.000447258	0.0274371	0.259423	0.132309
Q6IQ32;H0YLN6;H0YM09	Q6IQ32	ADNP homeobox protein 2	ADNP2			0.104854	0.218024	10	10	10	9.6	122.83	16.592	0.565545	0.183328	-0.296368	-0.0330883
Q9BVC6	Q9BVC6	Transmembrane protein 109	TMEM109			0.104558	0.455705	7	7	7	17.3	26.21	14.213	0.266802	-0.127226	0.0271541	0.251504
Q14739;C9JXK0;C9JES9	Q14739;C9JXK0	Lamin-B receptor	LBR			0.104422	1.11156	23	23	23	28.8	70.702	121.37	0.180037	0.113567	-0.00620245	0.130286
Q8WU79;A0A087WV97;Q8WU79-2;Q8WU79-3;X6RCC3	Q8WU79;A0A087WV97;Q8WU79-2;Q8WU79-3;X6RCC3	Stromal membrane-associated protein 2	SMAP2			0.104237	0.884545	17	17	16	36.1	46.785	164.87	0.118852	-0.0391917	0.142217	0.195071
Q4KMQ2-3;Q4KMQ2;Q4KMQ2-2;Q4KMQ2-4	Q4KMQ2-3;Q4KMQ2;Q4KMQ2-2;Q4KMQ2-4	Anoctamin-6	ANO6			0.10392	0.19219	4	4	4	6.8	103.96	15.614	-0.311852	-0.0572715	0.143132	0.641671
Q9ULV4;Q9ULV4-2;Q9ULV4-3;B4E3S0;H0YHL7;F8W1H8;F8VUX3;F8VSA4;F8VRE9;F8VTT6;F8VVB7;J3QLV6;J3KSS5;Q6QEF8-4;Q6QEF8-3;Q6QEF8-2;Q6QEF8-5;Q6QEF8;F8VV53	Q9ULV4;Q9ULV4-2;Q9ULV4-3;B4E3S0;H0YHL7	Coronin-1C;Coronin	CORO1C		+	0.103834	1.68893	27	26	26	54	53.248	228.79	0.114988	0.15082	0.0404014	0.109125
O94826	O94826	Mitochondrial import receptor subunit TOM70	TOMM70A			0.103807	0.564303	34	34	34	70.6	67.454	323.31	0.083447	-0.0582326	0.0751904	0.314822
Q9NYU2-2;Q9NYU2;Q9NYU1;H7BZG0;F8WCI2;F8WCE6	Q9NYU2-2;Q9NYU2	UDP-glucose:glycoprotein glucosyltransferase 1	UGGT1			0.103659	0.757668	79	79	79	64.4	174.97	323.31	0.198676	0.0116388	-0.00650674	0.21083
Q86U06-4;Q86U06-5;Q86U06-2;Q86U06;G3XAP0;Q86U06-3;G3V5Z6;H0YJJ3;G3V546;G3V225;G3V2B4	Q86U06-4;Q86U06-5;Q86U06-2;Q86U06;G3XAP0;Q86U06-3;G3V5Z6;H0YJJ3	Probable RNA-binding protein 23	RBM23			0.103506	0.217847	5	2	2	14.3	44.494	3.4368	0.22164	-0.232599	NaN	0.321477
Q14CX7;Q14CX7-2;H0YHR9;F8VSB9;F8W0N5	Q14CX7;Q14CX7-2	N-alpha-acetyltransferase 25, NatB auxiliary subunit	NAA25			0.10317	0.346974	40	40	40	47.7	112.29	270.08	-0.169797	-0.0205892	0.328607	0.27446
O76021;J3QSV6;I3L3U9;I3L3C4;O76021-2;I3L234;J3KPU7;I3L2F2;I3L4T8;I3L1Y4;I3L1A3	O76021;J3QSV6;I3L3U9	Ribosomal L1 domain-containing protein 1	RSL1D1			0.103083	0.465038	25	25	25	47.1	54.972	263.52	0.0815527	-0.139617	0.177727	0.29267
Q9H8G2-2;Q9H8G2	Q9H8G2-2;Q9H8G2	Caspase activity and apoptosis inhibitor 1	CAAP1			0.102759	0.188528	4	4	4	13	23.511	5.9203	0.0686801	-0.213387	NaN	0.452985
Q8NEJ9-2;Q8NEJ9;H0YJ17;G3V4G1;H0YJQ1	Q8NEJ9-2;Q8NEJ9;H0YJ17	Neuroguidin	NGDN			0.102531	0.457661	13	13	13	55	35.25	187.86	-0.0412431	-0.0707393	0.231432	0.290674
Q86W50;Q86W50-2;I3L362;I3L4V1;I3L3W3;K7EKQ8	Q86W50;Q86W50-2;I3L362	Methyltransferase-like protein 16	METTL16			0.102189	0.632564	18	18	18	37.5	63.62	104.84	0.213286	-0.0918788	0.104873	0.182475
B5MDE0;Q96AA3;C9JP01	B5MDE0;Q96AA3	Protein RFT1 homolog	RFT1			0.102116	0.129589	3	3	3	5.8	55.835	4.2953	0.241458	-0.420105	NaN	0.484994
P47813;O14602;X6RAC9;A6NJH9	P47813;O14602;X6RAC9	Eukaryotic translation initiation factor 1A, X-chromosomal;Eukaryotic translation initiation factor 1A, Y-chromosomal	EIF1AX;EIF1AY			0.102041	0.445096	10	10	10	47.9	16.46	136.72	-0.126709	0.0597706	0.327228	0.147873
O43670-2;J3QRS9;O43670;O43670-4;X6R4W8;O43670-3;J3KS31;J3QS27;J3KTL1;J3KRB6;J3KRW6;H0Y3M2	O43670-2;J3QRS9;O43670;O43670-4;X6R4W8;O43670-3	BUB3-interacting and GLEBS motif-containing protein ZNF207	ZNF207			0.101976	0.637668	11	11	11	26.3	49.692	150.69	-0.017637	-0.0111663	0.242694	0.194014
Q12846;Q12846-2;A0A087WWW0;C9JFM5;H3BMK2	Q12846;Q12846-2	Syntaxin-4	STX4			0.101817	0.820726	12	12	12	48.1	34.18	131.22	0.0269398	0.00805652	0.237319	0.134952
P08579	P08579	U2 small nuclear ribonucleoprotein B	SNRPB2			0.101815	0.683174	14	14	11	55.1	25.486	132.15	-0.030548	0.0234682	0.243181	0.171157
Q01813;B1APP8;B1APP6;H0Y757;Q5VSR5;V9GYV7;V9GY25;H0Y3Y3	Q01813	ATP-dependent 6-phosphofructokinase, platelet type	PFKP			0.101747	0.532934	40	38	2	56.5	85.595	323.31	-0.0524158	-0.0135381	0.278104	0.19484
P25054;P25054-2;B7Z2B6;E9PFT7	P25054;P25054-2	Adenomatous polyposis coli protein	APC			0.101585	0.599446	5	5	5	2.6	311.64	15.295	0.0309877	0.228603	NaN	0.0451636
Q9UGV2-2;Q9UGV2;Q5TH30;Q9UGV2-3;F8WBF9;Q5TH29	Q9UGV2-2;Q9UGV2;Q5TH30;Q9UGV2-3;F8WBF9	Protein NDRG3	NDRG3			0.101543	0.282904	14	14	14	54.5	39.982	159.6	-0.123931	-0.152596	0.289008	0.39369
Q6P2E9;Q6P2E9-2;I3L2F4;I3L0V0;I3L3M2	Q6P2E9;Q6P2E9-2	Enhancer of mRNA-decapping protein 4	EDC4			0.101417	0.519262	54	54	54	52.2	151.66	323.31	-0.0698397	-0.00660824	0.244644	0.237473
Q5H909;Q9UNF1-2;Q9UNF1;Q5H907;A0A087X070;Q12816-5;Q12816-3;Q12816-4	Q5H909;Q9UNF1-2;Q9UNF1;Q5H907	Melanoma-associated antigen D2	MAGED2			0.101389	0.483445	13	13	10	29.1	63.138	81.929	0.144983	-0.148033	0.15082	0.257787
Q96PE7;H7BZS7;F5GZ54	Q96PE7;H7BZS7	Methylmalonyl-CoA epimerase, mitochondrial	MCEE			0.101304	0.367887	6	6	6	47.7	18.749	34.577	0.377332	0.149259	-0.152436	0.0310614
Q96BT7;Q96BT7-4;Q96BT7-3;Q96BT7-2;C9JQN2	Q96BT7;Q96BT7-4	Alkylated DNA repair protein alkB homolog 8	ALKBH8			0.101223	0.631379	8	8	8	15.5	75.208	17.845	0.300164	0.0764222	0.0250288	0.00327856
O15234;J3KSY7;J3QSC4	O15234;J3KSY7	Protein CASC3	CASC3			0.101194	0.819225	11	11	11	15.9	76.277	32.375	0.0282486	-0.00304731	0.160791	0.218783
K7EMZ9	K7EMZ9		LSM14A			0.101177	0.480648	11	1	1	41.1	34.488	3.583	-0.100978	0.059909	0.321351	0.124424
Q5F1R6;Q5F1R6-3;Q5F1R6-2	Q5F1R6;Q5F1R6-3;Q5F1R6-2	DnaJ homolog subfamily C member 21	DNAJC21			0.101117	0.455334	13	13	13	26.9	62.027	49.834	0.0939098	-0.0620681	0.358959	0.0136692
K7ES61;Q9BYD3;X6RAY8;Q9BYD3-2;K7ELQ0;K7EKI4;K7ELF1;K7EJ73	K7ES61;Q9BYD3;X6RAY8;Q9BYD3-2;K7ELQ0;K7EKI4;K7ELF1	39S ribosomal protein L4, mitochondrial	MRPL4			0.100949	0.205877	15	15	15	60.7	33.792	248.21	0.168106	-0.39261	0.127369	0.500932
P28482;P28482-2;Q16659	P28482;P28482-2	Mitogen-activated protein kinase 1	MAPK1			0.100685	0.865975	24	24	18	77.8	41.389	177.41	0.0742891	-0.0268957	0.156785	0.19856
Q16204	Q16204	Coiled-coil domain-containing protein 6	CCDC6			0.100567	0.713213	24	24	24	46.4	53.29	184.14	0.132894	0.238787	0.0817487	-0.0511633
J3KMZ7;Q9H0H0;J3KRH0	J3KMZ7;Q9H0H0	Integrator complex subunit 2	INTS2			0.100448	0.3458	20	20	20	22	133.38	112.5	0.0765237	-0.179106	0.115566	0.388809
Q8IZD4;F5H4R4;B4DVJ6;Q8IZD4-2;F5GZK9	Q8IZD4;F5H4R4;B4DVJ6	mRNA-decapping enzyme 1B	DCP1B			0.100334	0.312264	15	15	15	29.5	67.722	93.892	-0.095722	-0.142306	0.324234	0.315127
Q9HCU8;Q9HCU8-2;E9PL15;A0A087WWV3	Q9HCU8;Q9HCU8-2	DNA polymerase delta subunit 4	POLD4			0.100322	0.199258	4	4	4	43.9	12.433	4.08	0.15674	-0.310397	-0.033348	0.588292
P22694-2;A0A0A0MS54;P22694-4;P22694-3;P22694;P22694-5;P22694-7;P22694-6;P22694-9;P22694-10;B1APG1;B1APG0;B1APG2;B1APF8;B1APF9;B1APG3;P22694-8;B1APF7	P22694-2;A0A0A0MS54;P22694-4;P22694-3;P22694;P22694-5;P22694-7;P22694-6;P22694-9;P22694-10;B1APG1;B1APG0;B1APG2;B1APF8;B1APF9;B1APG3;P22694-8;B1APF7	cAMP-dependent protein kinase catalytic subunit beta	PRKACB			0.100295	0.664042	20	20	4	52	46.235	120.42	0.0253973	-0.0278514	0.14274	0.260895
A0A087WWP8;A0A0C4DGT8;Q5VWQ0;A0A0C4DH79;Q5VWQ0-4	A0A087WWP8;A0A0C4DGT8;Q5VWQ0;A0A0C4DH79	Round spermatid basic protein 1	RSBN1			0.100225	0.733626	9	6	6	12.6	84.975	25.997	-0.0253123	0.0942361	0.0751904	0.256787
Q9BU23-2;Q9BU23;Q9BU23-3	Q9BU23-2;Q9BU23;Q9BU23-3	Lipase maturation factor 2	LMF2			0.10016	0.405001	5	5	5	8.9	76.914	49.544	0.199703	-0.194278	0.141564	0.253653
Q5C9Z4	Q5C9Z4	Nucleolar MIF4G domain-containing protein 1	NOM1			0.100141	0.254906	18	18	18	25.1	96.256	68.197	-0.174151	-0.125416	0.461109	0.239021
Q14151;Q14151-2;K7EQU4;K7ERX3	Q14151	Scaffold attachment factor B2	SAFB2			0.100076	1.11819	59	59	43	52.3	107.47	323.31	-0.00173015	0.113567	0.179638	0.10883
Q9UBH6-2;Q9UBH6	Q9UBH6-2;Q9UBH6	Xenotropic and polytropic retrovirus receptor 1	XPR1			0.100014	0.224232	7	7	7	16.5	73.918	38.297	0.00288831	-0.330284	0.438612	0.28884
Q6P1N0;Q6P1N0-2;K7EMP1;K7EJY5	Q6P1N0;Q6P1N0-2;K7EMP1	Coiled-coil and C2 domain-containing protein 1A	CC2D1A			0.100009	0.31226	42	42	42	48.6	104.06	238.22	-0.117429	-0.105302	0.229096	0.393672
O15228;O15228-2;Q5TBH8;Q5TBH6	O15228;O15228-2;Q5TBH8	Dihydroxyacetone phosphate acyltransferase	GNPAT			0.0999916	0.676551	29	29	29	46.5	77.187	109.28	0.269704	0.116365	0.0316775	-0.0177795
Q6IN84;A0A087WZC1;Q6IN84-2	Q6IN84	rRNA methyltransferase 1, mitochondrial	MRM1			0.0999861	0.169038	15	15	15	48.7	38.638	82.318	-0.0725861	-0.413576	0.299831	0.586276
P04183;K7ERV3;K7ES52;K7ERJ1;K7ENW5	P04183;K7ERV3;K7ES52;K7ERJ1	Thymidine kinase, cytosolic;Thymidine kinase	TK1			0.099884	0.403385	13	13	13	57.3	25.468	77.665	0.177882	-0.184212	0.119157	0.286709
Q9H7B2;Q5VXN0	Q9H7B2;Q5VXN0	Ribosome production factor 2 homolog	RPF2			0.0998565	0.296311	16	16	16	44.1	35.582	168.78	0.0259847	-0.221758	0.189919	0.40528
I3VM54;Q9Y2K7;Q9Y2K7-2;Q9Y2K7-4;Q9Y2K7-5;Q9Y2K7-3	I3VM54;Q9Y2K7;Q9Y2K7-2;Q9Y2K7-4;Q9Y2K7-5	Lysine-specific demethylase 2A	KDM2A			0.0998473	1.15738	17	17	17	17.6	130.66	41.766	0.0714363	0.0243196	0.108892	0.194741
Q99808;Q99808-2	Q99808;Q99808-2	Equilibrative nucleoside transporter 1	SLC29A1			0.0997171	0.228087	3	3	3	9.6	50.219	45.599	-0.0278618	-0.273308	0.511164	0.188874
Q9UNA1-2;Q9UNA1;H0Y4P9;F8W8N5;H0Y835;H7BZZ0;H7C3P8;H7C1J1	Q9UNA1-2;Q9UNA1;H0Y4P9	Rho GTPase-activating protein 26	ARHGAP26			0.0996707	0.58861	6	6	6	9.2	86.164	14.464	0.0246926	0.109427	0.295958	-0.0313952
Q5VIR6-4;Q5VIR6;Q5VIR6-2;Q5VIR6-3;F6VX93;E7EVT8;I3L184;I3L0S6	Q5VIR6-4;Q5VIR6;Q5VIR6-2;Q5VIR6-3;F6VX93;E7EVT8	Vacuolar protein sorting-associated protein 53 homolog	VPS53			0.0994714	0.769797	29	29	29	42.5	94.404	110.73	-0.0517201	0.086512	0.191563	0.171531
Q96LW7-2;Q96LW7	Q96LW7-2;Q96LW7	Bcl10-interacting CARD protein	C9orf89			0.0993165	0.297594	5	5	5	29	20.625	14.746	0.362733	0.258217	-0.218212	-0.00547193
Q9UGJ1-2;Q9UGJ1;H3BPU4;H3BN56;H3BQY4;H3BQ12;H3BS59	Q9UGJ1-2;Q9UGJ1;H3BPU4	Gamma-tubulin complex component 4	TUBGCP4			0.0992222	0.74306	20	20	20	36.6	76.017	97.3	0.205863	-0.0332151	0.182438	0.0418032
Q08378;Q08378-2;Q08378-4;A0A087WV43	Q08378;Q08378-2;Q08378-4	Golgin subfamily A member 3	GOLGA3			0.0992019	1.0415	67	67	67	52.5	167.35	323.31	0.15157	0.181166	0.054779	0.00929199
O95140;Q5JXC5	O95140	Mitofusin-2	MFN2			0.0991538	0.556748	19	17	5	28	86.401	42.42	-0.000576859	-0.0509956	0.181421	0.266767
P05091;P05091-2;F8VP50;S4R3S4;P00352;Q5SYQ7;Q5SYQ9;Q5SYQ8	P05091;P05091-2	Aldehyde dehydrogenase, mitochondrial	ALDH2			0.0990393	0.256724	28	28	26	66.7	56.381	218.37	0.387336	0.323197	-0.185819	-0.128557
C9J0W7;C9JNM5;Q96A54;F8W782	C9J0W7;C9JNM5;Q96A54;F8W782	Adiponectin receptor protein 1	ADIPOR1			0.0990356	0.262754	2	2	2	11.7	23.58	3.0277	0.366113	NaN	-0.090972	0.0219656
Q5T2E6;Q5T2E7;Q5T2E6-2	Q5T2E6	UPF0668 protein C10orf76	C10orf76			0.0989675	0.289794	9	9	9	19.4	78.71	56.803	-0.178747	-0.0595701	0.410341	0.223845
D6REX3;O94979;O94979-3;O94979-9;O94979-2;O94979-8;O94979-4;O94979-6;O94979-10;D6RHZ5;H7BXG7;O94979-7;O94979-5;H0YAB3;H0Y8V7;H0Y9K1;H0Y9T9;H0Y8W8;D6RE64;D6RCQ9;H0YAF5;H0Y9V3;D6RBT0;D6RHE8	D6REX3;O94979;O94979-3;O94979-9;O94979-2;O94979-8;O94979-4;O94979-6;O94979-10;D6RHZ5;H7BXG7;O94979-7;O94979-5	Protein transport protein Sec31A	SEC31A			0.0988588	1.04486	44	44	44	43	136.22	323.31	0.193981	0.0856966	0.000144286	0.115613
Q9BWD1;Q9BWD1-2	Q9BWD1;Q9BWD1-2	Acetyl-CoA acetyltransferase, cytosolic	ACAT2			0.098778	0.638158	22	22	22	79.3	41.35	323.31	0.212935	0.1956	0.0533895	-0.0668125
Q99570;D6RJ98;D6RAC3;D6RBB7	Q99570	Phosphoinositide 3-kinase regulatory subunit 4	PIK3R4			0.0985829	0.934142	40	40	40	37.8	153.1	184.46	0.00010095	0.0462816	0.157561	0.190388
P20340-2;P20340-4;Q9H0N0	P20340-2;P20340-4	Ras-related protein Rab-6A	RAB6A			0.0985736	0.497075	19	19	2	80.8	23.548	155.58	-0.0434844	-0.0264843	0.160275	0.303988
A0A0A0MTH9;O14981;O14981-2	A0A0A0MTH9;O14981	TATA-binding protein-associated factor 172	BTAF1			0.0985046	0.623356	53	53	53	35.5	206.93	240.38	0.0989226	-0.0673189	0.101381	0.261033
Q96H20-2;Q96H20;D6RJ86;D6RFY6;H0Y8S5;D6RBI1	Q96H20-2;Q96H20	Vacuolar-sorting protein SNF8	SNF8			0.0984252	0.472891	5	5	5	19.1	28.736	12.705	-0.0867838	0.0137839	0.157949	0.308752
P49257	P49257	Protein ERGIC-53	LMAN1			0.0983717	0.317537	22	22	22	46.3	57.548	323.31	0.389319	-0.00818885	-0.177767	0.190125
Q5U8S2;O60499;X6R2W0;K7EIY4;K7EPP9;K7ELY2;O60499-2;K7EJ05;F6RTM7;K7EQ84;K7EK75	Q5U8S2;O60499;X6R2W0;K7EIY4;K7EPP9;K7ELY2;O60499-2	Syntaxin-10	STX10			0.0982964	0.525077	9	9	9	58.9	27.56	35.279	-0.0441843	-0.00602862	0.299245	0.144154
O00116;B8ZZ81	O00116	Alkyldihydroxyacetonephosphate synthase, peroxisomal	AGPS			0.0980837	0.620287	38	38	38	67.2	72.911	323.31	0.0121116	-0.0401111	0.17594	0.244395
Q8TDD1;Q8TDD1-2;F8VRX4;H0YHH7;H0YHZ9	Q8TDD1;Q8TDD1-2	ATP-dependent RNA helicase DDX54	DDX54			0.0980468	0.260047	37	37	37	45.3	98.594	188.72	0.0537932	-0.246515	0.120883	0.464027
P14373-2;P14373;A0A0G2JIZ4	P14373-2;P14373;A0A0G2JIZ4	Zinc finger protein RFP	TRIM27			0.0979322	0.232507	5	5	5	17.3	41.439	12.983	0.494109	0.087327	-0.293288	0.103581
Q9BXJ9;A0A0B4J1W3;Q9BXJ9-4	Q9BXJ9;A0A0B4J1W3;Q9BXJ9-4	N-alpha-acetyltransferase 15, NatA auxiliary subunit	NAA15			0.0979214	0.731662	71	71	61	74.7	101.27	323.31	-0.0282861	0.0721745	0.248535	0.0992626
O60942;O60942-2;O60942-4;O60942-3	O60942;O60942-2;O60942-4;O60942-3	mRNA-capping enzyme;Polynucleotide 5-triphosphatase;mRNA guanylyltransferase	RNGTT			0.0975519	0.733293	23	23	23	51.9	68.556	105.5	-0.0504668	0.0749164	0.213129	0.152628
B4DR61;P61619;P61619-3;F8W776;Q8TC24;Q9H9S3-2;Q9H9S3-3;Q9H9S3;H7C1Q9;C9JXC6;H7C069;A6NK38;F2Z2C7;A6NIF9;C9JJV4;H7C1S8	B4DR61;P61619;P61619-3	Protein transport protein Sec61 subunit alpha isoform 1	SEC61A1			0.0975358	0.838646	14	14	14	25.7	52.949	48.341	0.194311	0.0301242	-0.00491356	0.170621
Q3LIE7;Q15392-2;Q15392;H7C4B7	Q3LIE7;Q15392-2;Q15392	Delta(24)-sterol reductase	Nbla03646;DHCR24			0.0974993	0.421059	19	19	19	44.3	49.436	70.946	0.360749	0.0299829	-0.0862776	0.0855426
P15498;P15498-2;F5H5P4;Q96D37;A0A0A0MR07	P15498;P15498-2;F5H5P4;Q96D37;A0A0A0MR07	Proto-oncogene vav	VAV1			0.0973452	0.997623	42	42	41	48	98.313	298.33	0.15756	0.165558	0.0784732	-0.012211
P15170-2;P15170-3;P15170;H3BR35;H3BSV8	P15170-2;P15170-3;P15170;H3BR35	Eukaryotic peptide chain release factor GTP-binding subunit ERF3A	GSPT1		+	0.0972703	1.40357	35	35	16	53.5	68.6	323.31	0.0559511	0.0430645	0.15056	0.139506
Q9Y2R4;A0A087X1P7;A0A087WTD6;A0A087X069;A0A087X121	Q9Y2R4	Probable ATP-dependent RNA helicase DDX52	DDX52			0.0970736	0.276773	25	25	25	48.2	67.497	201.99	-0.0614305	-0.190635	0.228973	0.411387
H0Y6Y8;B1AL05;Q8N983-4;Q8N983-3;Q8N983-2;Q8N983;Q8N983-6;Q8N983-7;M0R051;H0YBU8	H0Y6Y8;B1AL05;Q8N983-4;Q8N983-3;Q8N983-2;Q8N983;Q8N983-6;Q8N983-7	39S ribosomal protein L43, mitochondrial	MRPL43			0.0970463	0.485516	7	7	7	35.5	18.657	18.669	-0.00259445	-0.0700272	0.162081	0.298726
P62913-2;P62913;Q5VVC8;Q5VVC9	P62913-2;P62913;Q5VVC8;Q5VVC9	60S ribosomal protein L11	RPL11			0.0969204	0.562837	16	16	16	72.9	20.124	196.22	-0.095722	0.105946	0.255924	0.121534
Q9H0G5;A0A024QZ33;K7ERM9;J3KT62;J3QLV5;J3QRI6;K7EQJ6;K7EMD8;K7EK40	Q9H0G5;A0A024QZ33	Nuclear speckle splicing regulatory protein 1	NSRP1;CCDC55			0.0967511	0.294474	17	17	17	31.4	66.389	84.255	-0.170053	-0.0784418	0.314058	0.321441
U3KQU8;C9JLB7;Q96HP4	U3KQU8;C9JLB7;Q96HP4	Oxidoreductase NAD-binding domain-containing protein 1	OXNAD1			0.096626	0.968933	8	8	8	29.3	34.725	31.101	0.207378	0.000721115	0.0832474	0.0951576
Q96KP4;Q96KP4-2;J3QKT2;J3KSV5;A0A087WYZ1;J3QKQ0;J3QRD0;J3QRA8;J3QQN6;J3QR27;J3QLU1;J3QL02;A0A087WVS2;J3KSS4;J3QRH4;J3KRD5;J3QRP4;J3KRJ8	Q96KP4;Q96KP4-2	Cytosolic non-specific dipeptidase	CNDP2			0.0966136	0.881496	38	38	38	86.1	52.878	323.31	-0.0024506	0.144568	0.202637	0.0416993
P35790-2;P35790;E9PM06	P35790-2;P35790	Choline kinase alpha	CHKA			0.0965954	0.567625	5	5	5	14.1	50.154	12.609	0.17909	0.140255	NaN	-0.0295589
P61313;E7EQV9;E7ENU7;E7EX53;P61313-2;E7ERA2	P61313;E7EQV9;E7ENU7	60S ribosomal protein L15;Ribosomal protein L15	RPL15			0.0965493	0.973102	17	17	17	52	24.146	211.74	0.0119662	0.0361869	0.161565	0.176479
Q9NTJ5;F8WCQ2	Q9NTJ5	Phosphatidylinositide phosphatase SAC1	SACM1L			0.0964768	1.17057	32	32	8	49.6	66.966	171.14	0.133052	0.0821575	0.00662125	0.164076
Q86U38;Q86U38-2;H0YJP7	Q86U38;Q86U38-2	Nucleolar protein 9	NOP9			0.0964645	0.9533	15	15	15	34.9	69.437	188.79	0.00875482	0.0368901	0.159112	0.1811
O00154-4;O00154-6;O00154-7;O00154;O00154-5;K7EKP8;O00154-2;O00154-3	O00154-4;O00154-6;O00154-7;O00154;O00154-5;K7EKP8;O00154-2;O00154-3	Cytosolic acyl coenzyme A thioester hydrolase	ACOT7			0.096196	0.325185	18	18	17	67.5	37.419	192.25	-0.127369	-0.0824995	0.33514	0.259513
Q6FI81;H3BV90;Q6FI81-3;H3BT65;H3BUG4;H3BPG7;H3BQ23;Q6FI81-2;H3BTT4;H3BTZ8	Q6FI81;H3BV90;Q6FI81-3;H3BT65;H3BUG4;H3BPG7	Anamorsin	CIAPIN1			0.0961118	1.1467	19	19	19	66.7	33.582	269.45	0.114597	-0.0064778	0.124725	0.151602
Q8TB61-3;Q8TB61-2;Q8TB61;Q8TB61-5;Q8TB61-4	Q8TB61-3;Q8TB61-2;Q8TB61;Q8TB61-5;Q8TB61-4	Adenosine 3-phospho 5-phosphosulfate transporter 1	SLC35B2			0.0960419	0.162812	5	5	5	10.2	42.127	7.4972	-0.0612924	-0.414595	0.265917	0.594138
P16435;H0Y4R2;E7EMD0;C9JU80;E7EWU0	P16435;H0Y4R2;E7EMD0	NADPH--cytochrome P450 reductase	POR			0.0959847	0.420769	30	30	30	51.4	76.689	323.31	0.0785027	-0.141653	0.136191	0.310898
O95881;V9GY50;V9GYV4	O95881	Thioredoxin domain-containing protein 12	TXNDC12			0.0959378	0.510678	9	9	9	63.4	19.206	62.223	0.0428283	-0.0839208	0.136585	0.288258
O75832;B1AJY5;B1AJY7;O75832-2;B1AJY6	O75832;B1AJY5;B1AJY7;O75832-2	26S proteasome non-ATPase regulatory subunit 10	PSMD10			0.095868	0.973413	12	12	12	72.6	24.428	177.95	0.0354017	0.012068	0.16543	0.170573
E7EVH9;Q08623-3;Q08623;Q08623-4;Q08623-2	E7EVH9;Q08623-3;Q08623;Q08623-4;Q08623-2	Pseudouridine-5-phosphatase	HDHD1			0.0958293	0.921388	10	10	10	77.5	21.466	106.17	0.03552	0.0962619	0.0302654	0.22127
O95169;O95169-3;E9PQ68;O95169-2;K9J7I2;E9PIZ8	O95169;O95169-3;E9PQ68;O95169-2;K9J7I2	NADH dehydrogenase [ubiquinone] 1 beta subcomplex subunit 8, mitochondrial	NDUFB8			0.0956541	0.213887	7	7	7	51.6	21.766	47.964	0.0823925	-0.309574	0.0915306	0.518267
P78344;D3DQV9;P78344-2;H0Y3P2;H0YCH5;H0YD77;H0YEC5;H0YCF8;H0YE22;H0YEN8;H0YDC0;H0YD99;H0YE44;H0YEW3;H0YEI7	P78344;D3DQV9;P78344-2;H0Y3P2;H0YCH5	Eukaryotic translation initiation factor 4 gamma 2	EIF4G2			0.0956432	0.846248	59	59	46	62.6	102.36	323.31	0.0111663	0.0137839	0.1644	0.193222
Q7Z3T8;Q7Z3T8-3	Q7Z3T8;Q7Z3T8-3	Zinc finger FYVE domain-containing protein 16	ZFYVE16			0.0955471	0.857619	10	10	10	9.3	168.9	40.873	-0.0282861	0.0698396	0.163112	0.177523
Q5HYK3;B4DP72;F8VVX6;F8VP53;F8VVW7;Q5HYK3-2;F8VVD5	Q5HYK3;B4DP72;F8VVX6	2-methoxy-6-polyprenyl-1,4-benzoquinol methylase, mitochondrial	COQ5			0.0954884	0.21773	14	14	14	51.4	37.14	62.185	-0.234133	-0.124031	0.261471	0.478648
P29992;K7EL62;P50148;A0A087WVZ3	P29992;K7EL62	Guanine nucleotide-binding protein subunit alpha-11	GNA11			0.0953644	0.296579	7	7	5	25.9	42.123	23.611	0.208161	-0.234567	0.0517201	0.356144
Q9BRT3;J3KTI2	Q9BRT3;J3KTI2	Migration and invasion enhancer 1	MIEN1			0.095187	0.263096	6	6	6	65.2	12.403	14.856	-0.261711	0.0223323	0.382723	0.237405
Q5JSH3;Q5JSH3-2;Q5JSH3-4;H7BY83;Q5JSH3-3	Q5JSH3;Q5JSH3-2;Q5JSH3-4;H7BY83	WD repeat-containing protein 44	WDR44			0.0950988	0.959361	33	33	33	44.4	101.37	98.673	0.0888224	0.136585	0.175045	-0.0200577
Q9BQP7;Q5QPE7;Q5QPE8	Q9BQP7;Q5QPE7;Q5QPE8	Mitochondrial genome maintenance exonuclease 1	MGME1			0.0950762	0.899397	19	19	19	60.8	39.42	69.984	0.0203844	0.0207689	0.135666	0.203485
Q8WWH5	Q8WWH5	Probable tRNA pseudouridine synthase 1	TRUB1			0.0950747	0.404557	14	14	14	47.6	37.252	54.861	-0.0954519	-0.0318429	0.313942	0.193651
P78332;E9PGM9;F8WCA5;P78332-2;P78332-3;F8WF63;C9JMC8;C9J250;C9JSL1;F8WCT0	P78332;E9PGM9;F8WCA5;P78332-2	RNA-binding protein 6	RBM6		+	0.0949067	1.62865	24	22	21	24	128.64	87.393	0.130602	0.054779	0.0582473	0.135998
Q0VDF9;H7C2A1;B0YIZ1	Q0VDF9	Heat shock 70 kDa protein 14	HSPA14			0.0949012	1.01815	26	26	26	67.6	54.794	323.31	0.0169645	0.0536674	0.110363	0.19861
P62701;A6NH36;Q8TD47;C9JEH7;P22090	P62701	40S ribosomal protein S4, X isoform	RPS4X			0.0947409	0.629152	26	26	26	72.2	29.597	280.41	0.00432009	-0.0344115	0.210015	0.19904
Q9BW91-2;Q9BW91;D6RAW2;H7C386;D6R8Z6	Q9BW91-2;Q9BW91;D6RAW2;H7C386	ADP-ribose pyrophosphatase, mitochondrial	NUDT9		+	0.0946653	1.40439	13	13	13	63.3	33.775	58.538	0.0161911	0.1137	0.139862	0.108907
P50748;E7ES84;P50748-2;F5H5V0;H0YFL5;J3KQF2	P50748;E7ES84	Kinetochore-associated protein 1	KNTC1			0.0945494	0.232334	59	59	59	29.9	250.75	193.46	-0.168129	-0.180724	0.365245	0.361806
Q14697;Q14697-2;F5H6X6;E9PKU7;E9PNH1;Q14697-3	Q14697;Q14697-2;F5H6X6;E9PKU7	Neutral alpha-glucosidase AB	GANAB			0.0943356	0.404187	62	62	62	66.5	106.87	323.31	0.171482	-0.156225	0.0698396	0.292245
P46736-2;P46736-3;P46736;A0A087WZR3;H9KVA9;A0A0D9SF50;X6RJS7;P46736-4;P46736-5;A0A0A0MS96	P46736-2;P46736-3;P46736;A0A087WZR3;H9KVA9;A0A0D9SF50;X6RJS7;P46736-4;P46736-5	Lys-63-specific deubiquitinase BRCC36	BRCC3			0.0942787	0.989132	12	12	12	54	33.149	112.11	0.110106	0.0110662	0.0563061	0.199636
P11279;P11279-2	P11279;P11279-2	Lysosome-associated membrane glycoprotein 1	LAMP1			0.0942653	0.562556	9	9	9	16.8	44.882	66.407	0.0702091	-0.0959283	0.204767	0.198014
Q86Y37;Q86Y37-2;Q86Y37-4	Q86Y37;Q86Y37-2;Q86Y37-4	CDK2-associated and cullin domain-containing protein 1	CACUL1			0.0942379	0.308025	6	6	6	21.4	41.063	24.869	-0.0137839	-0.180806	0.370164	0.201377
Q14586;H3BPW2	Q14586	Zinc finger protein 267	ZNF267			0.0941627	0.195449	7	7	7	10.9	87.375	31.026	-0.410775	0.22132	0.437334	0.128771
Q86V81;E9PB61	Q86V81;E9PB61	THO complex subunit 4	ALYREF			0.094069	0.328691	11	11	11	51	26.888	323.31	-0.134089	-0.0651891	0.249021	0.326534
O94992	O94992	Protein HEXIM1	HEXIM1			0.0939697	0.71803	10	10	10	29.8	40.623	44.941	-0.0189191	0.0186342	0.161823	0.214341
P17861-2;B1AHH2;P17861;B1AHH1	P17861-2;B1AHH2;P17861	X-box-binding protein 1;X-box-binding protein 1, cytoplasmic form;X-box-binding protein 1, luminal form	XBP1			0.0937618	0.44741	5	5	5	14.4	40.148	16.853	-0.040121	0.346758	0.0486547	0.0197553
O00442;O00442-2;A6NIC1	O00442;O00442-2	RNA 3-terminal phosphate cyclase	RTCA			0.0937009	0.931609	16	16	16	64.5	39.336	193.4	0.190421	0.108892	-0.018235	0.0937251
Q15084-5;Q15084-3;Q15084;Q15084-4;Q15084-2	Q15084-5;Q15084-3;Q15084;Q15084-4;Q15084-2	Protein disulfide-isomerase A6	PDIA6			0.0935951	0.509248	24	24	24	55.3	53.261	323.31	0.291504	0.0526941	-0.0782895	0.108472
Q5T123;A0A087WV23;Q9H299	Q5T123;A0A087WV23;Q9H299	SH3 domain-binding glutamic acid-rich-like protein 3	SH3BGRL3			0.093579	0.275463	3	3	3	34.1	9.3804	80.721	-0.239276	0.230818	0.366364	0.0164098
P62829;J3KT29;C9JD32;B9ZVP7;J3KTJ3;J3QQT9	P62829;J3KT29;C9JD32;B9ZVP7	60S ribosomal protein L23	RPL23			0.0934309	0.738395	14	14	14	77.1	14.865	239.52	0.100654	-0.0589087	0.140124	0.191854
Q7Z6J9;J3QLM6;J3KRC5;Q7Z6J9-2	Q7Z6J9	tRNA-splicing endonuclease subunit Sen54	TSEN54			0.0934114	0.656718	8	8	8	24.3	58.819	44.689	-0.0672258	0.14104	0.218843	0.0809879
P42898;P42898-2;Q5SNW5	P42898;P42898-2	Methylenetetrahydrofolate reductase	MTHFR			0.0933783	0.842193	13	13	13	21.6	74.596	35.28	0.0449849	-0.0155346	0.156914	0.187149
F5GX51;Q9Y4F9;F5H029;B7Z6U4;Q9Y4F9-2;A0A0C4DGT0	F5GX51;Q9Y4F9;F5H029;B7Z6U4;Q9Y4F9-2;A0A0C4DGT0	Protein FAM65B	FAM65B			0.0933205	0.0388806	18	18	18	23.4	116.05	247.9	-0.85997	-0.936166	-0.279091	2.44851
Q9BZI7-2;Q9BZI7;A0A087WYC8	Q9BZI7-2;Q9BZI7;A0A087WYC8	Regulator of nonsense transcripts 3B	UPF3B			0.0932094	0.472877	15	15	15	41.1	56.213	60.751	-0.00776948	-0.0707393	0.288418	0.162929
P61956-2;P61956;Q6EEV6	P61956-2;P61956	Small ubiquitin-related modifier 2	SUMO2			0.0931449	0.987128	3	3	2	36.6	8.1111	28.247	0.0176945	0.0780633	0.206643	0.0701786
Q9HD33-2;Q9HD33;Q9HD33-3	Q9HD33-2;Q9HD33;Q9HD33-3	39S ribosomal protein L47, mitochondrial	MRPL47			0.0930558	0.250684	15	15	15	50.4	27.085	39.946	-0.00776948	-0.246276	0.205893	0.420376
Q9Y4F3-3;Q9Y4F3-5;Q9Y4F3;Q9Y4F3-4;G8JLP4;F8VVB8;F8VRS5;Q9Y4F3-6	Q9Y4F3-3;Q9Y4F3-5;Q9Y4F3;Q9Y4F3-4;G8JLP4;F8VVB8	Meiosis arrest female protein 1	KIAA0430			0.0930236	1.29179	14	13	13	11.1	186.44	23.423	0.132436	0.0193461	0.0723116	0.148001
Q9H7E2-3;Q9H7E2;Q9H7E2-2;B1AMN9;F2Z2Y2	Q9H7E2-3;Q9H7E2;Q9H7E2-2	Tudor domain-containing protein 3	TDRD3			0.0929832	0.774567	21	21	21	37.4	83.102	65.23	-0.00028853	0.0614305	0.239642	0.0711484
P62266;D6RD47;D6RDJ2;D6RIX0;D6R9I7	P62266;D6RD47	40S ribosomal protein S23	RPS23			0.0928493	0.566662	10	10	10	49.7	15.807	103.45	-0.0024506	-0.046325	0.185232	0.234941
Q8TBX8;Q8TBX8-3;Q8TBX8-2;F8VNT5;F8VU68;H0YIJ6	Q8TBX8;Q8TBX8-3;Q8TBX8-2;F8VNT5	Phosphatidylinositol 5-phosphate 4-kinase type-2 gamma	PIP4K2C			0.0926744	0.899736	17	17	17	39	47.299	70.886	0.0251036	0.0519985	0.221568	0.0720277
P34932;A0A087WYC1;A0A087WTS8;P34932-2	P34932;A0A087WYC1;A0A087WTS8	Heat shock 70 kDa protein 4	HSPA4			0.0925593	0.498294	77	77	73	83.3	94.33	323.31	-0.0790197	0.0238941	0.279055	0.146308
F8VVA7;P61923;P61923-4;F8VYZ4;P61923-5;F8VXB1;F8W156;F8W651;F8VXR1;P61923-3;F8VUC5;F8VYK5;F8VYE0;P61923-2	F8VVA7;P61923;P61923-4;F8VYZ4;P61923-5;F8VXB1;F8W156;F8W651;F8VXR1;P61923-3	Coatomer subunit zeta-1	COPZ1		+	0.0925478	1.4168	9	9	9	58.1	22.34	135.7	0.143867	0.128294	0.0333701	0.0646609
Q5BJF2;J3KT68;Q86XC5;J3KTD1	Q5BJF2;J3KT68	Transmembrane protein 97	TMEM97			0.0925018	0.165906	3	3	3	18.8	20.848	4.9489	0.0744562	-0.468651	0.278461	0.485741
A0A0G2JNB1;A0A0G2JQF4;A0A0G2JNT7;Q7Z3B3;I3L4J3;A0A0G2JQF5;I3L233;I3L243;Q7Z3B3-2	A0A0G2JNB1;A0A0G2JQF4;A0A0G2JNT7;Q7Z3B3;I3L4J3;A0A0G2JQF5	KAT8 regulatory NSL complex subunit 1	KANSL1			0.0924178	0.343537	15	15	14	21.7	120.85	38.068	0.133559	-0.223003	0.226262	0.232854
Q9UKD2	Q9UKD2	mRNA turnover protein 4 homolog	MRTO4			0.0924115	0.667569	13	13	13	58.6	27.56	71.585	8.66766e-05	-0.0180597	0.208268	0.179351
E7EWM1;Q15596	E7EWM1;Q15596	Nuclear receptor coactivator 2	NCOA2			0.09236	0.106412	4	4	4	4.8	102.73	5.1101	0.181755	0.549817	NaN	-0.454492
Q9NS86	Q9NS86	LanC-like protein 2	LANCL2			0.092199	0.759229	11	11	11	31.6	50.854	55.09	0.235076	-0.0127664	0.0621218	0.0843643
P27986;P27986-4;P27986-3;P27986-2;P27986-5;H0YBC2;E5RJY0;H0YB27;E5RGI8;E5RHI0	P27986;P27986-4;P27986-3;P27986-2;P27986-5	Phosphatidylinositol 3-kinase regulatory subunit alpha	PIK3R1		+	0.0921315	1.80223	29	28	25	37.8	83.597	119.18	0.0986136	0.0529723	0.140386	0.0765542
Q96G03;E7ENQ8;Q96G03-2;E9PD70;H0Y921	Q96G03	Phosphoglucomutase-2	PGM2			0.0920825	0.669749	37	37	37	60.9	68.283	323.31	-0.0116388	0.208018	0.177854	-0.0059029
O43242;O43242-2;H0YGV8;F5H8K4	O43242;O43242-2	26S proteasome non-ATPase regulatory subunit 3	PSMD3			0.0919346	0.505614	48	48	48	70.8	60.977	323.31	-0.0405417	-0.0382433	0.226632	0.219891
Q9H1E5	Q9H1E5	Thioredoxin-related transmembrane protein 4	TMX4			0.0913622	0.397875	3	3	3	12	38.952	20.22	0.143612	-0.0950189	-0.0121407	0.328997
P26006;P26006-1;H0YA32;K7EMU3;D6R9X8;H0YA49	P26006;P26006-1	Integrin alpha-3;Integrin alpha-3 heavy chain;Integrin alpha-3 light chain	ITGA3			0.0913044	0.0894154	5	5	5	3.8	116.61	7.1283	-0.342555	-0.147266	NaN	0.763734
E7ESL0;A0A0C4DGX2;J3KQY1;Q9NWU5;Q9NWU5-2;Q9NWU5-3	E7ESL0;A0A0C4DGX2;J3KQY1;Q9NWU5;Q9NWU5-2;Q9NWU5-3	39S ribosomal protein L22, mitochondrial	MRPL22			0.0912446	0.533924	10	10	10	46.2	24.325	73.51	0.116379	-0.107306	0.121015	0.23489
Q69YN2;Q69YN2-3;X6R7M0;Q69YN2-2	Q69YN2;Q69YN2-3	CWF19-like protein 1	CWF19L1			0.0911841	0.702373	28	28	28	72.5	60.618	213.95	-0.014641	0.016211	0.224534	0.138632
O00308;O00308-2;O00308-3;O00308-4;H3BPJ8;H3BRX8;H3BS79;Q9H0M0-6;Q9H0M0-3;Q9H0M0	O00308;O00308-2	NEDD4-like E3 ubiquitin-protein ligase WWP2	WWP2			0.0910848	0.311442	18	18	17	23.6	98.911	31.729	-0.140386	-0.0534189	0.192068	0.366076
O14745;O14745-2;J3QRP6;J3QRA3	O14745;O14745-2	Na(+)/H(+) exchange regulatory cofactor NHE-RF1	SLC9A3R1			0.0910426	0.741345	24	24	24	71.2	38.868	231.75	0.0109192	-0.00773913	0.201885	0.159106
Q8IUR7-7;Q8IUR7;Q8IUR7-2;B7Z637;Q8IUR7-8;Q8IUR7-3;C9J2I1;H7C4J4	Q8IUR7-7;Q8IUR7;Q8IUR7-2;B7Z637;Q8IUR7-8;Q8IUR7-3	Armadillo repeat-containing protein 8	ARMC8			0.0909705	0.55704	19	19	8	34.1	71.898	78.238	0.00536224	-0.0544822	0.23352	0.179482
O60711;O60711-2;B7Z5P7;E9PNX9	O60711;O60711-2;B7Z5P7	Leupaxin	LPXN			0.0908304	0.540816	19	19	19	67.4	43.332	237.07	0.232379	-0.0587133	0.00216244	0.187494
P60660-2;G8JLA2;F8VZU9;F8W180;F8VXL3	P60660-2;G8JLA2	Myosin light polypeptide 6	MYL6			0.0908303	0.874224	11	11	1	82.8	16.961	217.03	0.0214821	0.0829751	0.218471	0.0403931
P41227;P41227-2;F8W808;A8MWP7;C9JN83;C9JW55;Q9BSU3;H0Y8T0	P41227;P41227-2;F8W808;A8MWP7;C9JN83	N-alpha-acetyltransferase 10	NAA10			0.0906495	1.0114	18	18	18	77	26.458	323.31	0.0427837	0.0863761	0.1995	0.0339386
Q9NSD9;Q9NSD9-2	Q9NSD9;Q9NSD9-2	Phenylalanine--tRNA ligase beta subunit	FARSB			0.0906179	0.749049	39	39	39	65.2	66.115	323.31	-0.0265876	0.0448837	0.211012	0.133163
O43615;M0QXU7;M0R301;M0QXM9;M0R124	O43615;M0QXU7	Mitochondrial import inner membrane translocase subunit TIM44	TIMM44			0.0906115	0.51741	26	26	26	53.1	51.355	274.8	0.0263227	-0.0807286	0.169412	0.24744
P04406;E7EUT5;O14556	P04406;E7EUT5	Glyceraldehyde-3-phosphate dehydrogenase	GAPDH			0.090607	0.453317	33	33	3	89.3	36.053	323.31	-0.0732718	-0.0254266	0.262914	0.198212
Q96AB6;A0A087X0T5;H3BPN7;H3BNJ5	Q96AB6;A0A087X0T5	Protein N-terminal asparagine amidohydrolase	NTAN1			0.090556	0.464258	4	4	4	19.4	34.677	13.008	-0.0897694	0.0846086	0.302407	0.0649779
Q5TEJ8;Q5TEJ8-3;Q5TEJ8-5;H7C124;Q5TEJ8-6;Q5TEJ8-2;Q5TEK2;X6RK39;Q5TEJ8-4	Q5TEJ8;Q5TEJ8-3;Q5TEJ8-5;H7C124;Q5TEJ8-6	Protein THEMIS2	THEMIS2			0.0902499	0.20161	11	11	11	25.8	72.048	29.775	0.364255	-0.378044	0.0736831	0.301106
O43264;O43264-2;F5H3C1	O43264;O43264-2	Centromere/kinetochore protein zw10 homolog	ZW10			0.0901694	0.424067	43	43	43	61	88.828	292.58	-0.104203	0.00388999	0.287118	0.173873
E7EMN6;P41236;E7EUI7;Q6NXS1	E7EMN6;P41236;E7EUI7	Protein phosphatase inhibitor 2	PPP1R2		+	0.0901229	1.74955	13	13	13	61.8	19.245	119.74	0.124943	0.117296	0.0743684	0.0438839
Q8N5N7;Q8N5N7-2	Q8N5N7;Q8N5N7-2	39S ribosomal protein L50, mitochondrial	MRPL50			0.0900879	0.300578	11	11	11	71.5	18.325	109.46	0.116755	-0.205763	0.0790197	0.37034
Q15910;Q15910-3;Q15910-2;G3XAL2;A0A0A0MSY9;Q92800-5;Q92800-4;Q92800-3;Q92800;Q92800-2;E9PDH6;K7EIH5	Q15910;Q15910-3;Q15910-2	Histone-lysine N-methyltransferase EZH2	EZH2			0.0898813	0.58833	20	20	2	37.3	85.362	167.09	-0.00475299	-0.0350469	0.173895	0.22543
O43829;J3KRQ2;J3QL74;J3QLI2	O43829	Zinc finger and BTB domain-containing protein 14	ZBTB14			0.0898771	0.879338	5	5	5	12.2	50.956	9.2196	0.0614206	-0.0175047	0.183963	0.131629
Q9UHD1;Q9UHD1-2;E9PPQ5;E9PIZ4;E9PSD5;E9PHZ2;E9PL00;E9PIF7	Q9UHD1;Q9UHD1-2;E9PPQ5	Cysteine and histidine-rich domain-containing protein 1	CHORDC1			0.0898108	0.342979	22	22	22	70.2	37.489	323.31	-0.12618	-0.0515786	0.246469	0.290533
D6W601;Q96EY9	D6W601;Q96EY9	Probable inactive tRNA-specific adenosine deaminase-like protein 3	ADAT3			0.0897482	0.298462	6	6	6	22.6	39.844	12.904	0.343568	-0.0936481	-0.12874	0.237813
C9J4J4;Q02080-2;B8ZZJ5;B3KQ23;D6RJ95;H0YNI2	C9J4J4;Q02080-2;B8ZZJ5;B3KQ23	Myocyte-specific enhancer factor 2B	MEF2B			0.089743	0.190437	20	20	6	51.2	39.81	109.81	0.0565512	-0.340861	0.125387	0.517895
H0Y9G6;E7ETU7;P09001;E9PF06;D6RC14;D6RBQ5	H0Y9G6;E7ETU7;P09001;E9PF06;D6RC14	39S ribosomal protein L3, mitochondrial	MRPL3			0.0896581	0.318102	15	15	15	47.1	40.47	43.003	0.274896	-0.203934	0.0360461	0.251625
Q8NCD3-3;Q8NCD3-2;Q8NCD3;C9JWC4;H7C3V8	Q8NCD3-3;Q8NCD3-2;Q8NCD3;C9JWC4	Holliday junction recognition protein	HJURP			0.089623	0.30119	5	5	5	10.4	74.371	9.7851	0.31838	0.259303	-0.154859	-0.0643311
Q9NQ88	Q9NQ88	Fructose-2,6-bisphosphatase TIGAR	TIGAR			0.0895118	0.318063	10	10	10	54.1	30.062	61.077	-0.0801119	-0.123025	0.31371	0.247474
Q15286;F5H157;Q15286-2;F5H7F8	Q15286;F5H157;Q15286-2	Ras-related protein Rab-35	RAB35			0.0894697	1.15541	11	11	11	68.2	23.025	120.45	0.0270721	0.0433446	0.161952	0.12551
F5GZS6;P08195;J3KPF3;P08195-3;P08195-4;F5GZI0;H0YFS2;H0YFX4;F5GZR9	F5GZS6;P08195;J3KPF3;P08195-3;P08195-4	4F2 cell-surface antigen heavy chain	SLC3A2			0.0893821	0.537906	40	40	3	61.3	64.872	323.31	-0.0231843	-0.0384211	0.195474	0.22366
P30040;F8VY02;F8W1G0;P30040-2	P30040;F8VY02	Endoplasmic reticulum resident protein 29	ERP29			0.0891395	0.456439	15	15	15	60.9	28.993	127.59	0.0126791	-0.0782438	0.12618	0.295942
O00232;O00232-2;J3KTJ5;J3KSK1	O00232;O00232-2	26S proteasome non-ATPase regulatory subunit 12	PSMD12			0.0890535	0.496534	30	30	30	69.5	52.904	323.31	-0.0657101	-0.0115298	0.227741	0.205713
Q9HCN8	Q9HCN8	Stromal cell-derived factor 2-like protein 1	SDF2L1			0.0890517	0.487193	14	14	14	79.2	23.598	301.93	0.26609	-0.0442854	-0.0306929	0.165095
Q9P270;D6RIF6	Q9P270	SLAIN motif-containing protein 2	SLAIN2			0.089044	0.530971	9	9	9	18.8	62.543	39.646	0.00933556	-0.00814535	0.29537	0.0596153
Q13206;E9PIF2	Q13206;E9PIF2	Probable ATP-dependent RNA helicase DDX10	DDX10			0.0889636	0.769877	36	36	36	41.8	100.89	229.92	0.00724615	0.000288558	0.186247	0.162073
Q13509;A0A0B4J269;Q13509-2;G3V2A3;G3V5W4;G3V2R8;G3V3R4;G3V2N6;G3V542;G3V3J6;G3V3W7	Q13509;A0A0B4J269;Q13509-2	Tubulin beta-3 chain	TUBB3			0.0887877	0.794534	27	14	11	68.4	50.432	323.31	0.0478603	-0.022874	0.194087	0.136077
Q5HYI7-5;Q5HYI7;Q5HYI7-4;Q5HYI7-2	Q5HYI7-5;Q5HYI7;Q5HYI7-4	Metaxin-3	MTX3			0.088785	0.38067	5	5	5	16.3	28.608	7.7953	-0.00805654	0.0557509	-0.0560112	0.363457
Q9Y5X3;Q5QPE5;Q5QPE4;A0A087WUY5;U3KQL0;U3KQP5;Q9Y5X3-2;G3V2U1	Q9Y5X3;Q5QPE5;Q5QPE4	Sorting nexin-5	SNX5			0.0886997	0.639136	25	24	24	50	46.816	200.03	-0.0227584	0.0586628	0.255319	0.063575
A0A0B4J1S8;Q9UBF8-2;Q9UBF8;Q9UBF8-3;F8W860;E9PL47;A0A0A0MSL0;H0YCW3;H0Y4F8;A6PVV8	A0A0B4J1S8;Q9UBF8-2;Q9UBF8;Q9UBF8-3	Phosphatidylinositol 4-kinase beta	PI4KB			0.0886923	1.2122	14	14	14	22.7	92.723	28.033	0.115832	0.0360461	0.0413831	0.161508
D6RDX7;Q6PCB8-2;Q6PCB8	D6RDX7;Q6PCB8-2;Q6PCB8	Embigin	EMB			0.0885997	1.24217	6	6	6	22.7	30.874	27.024	0.00206455	0.132379	0.116498	0.103457
Q96DF8;F8WEF8	Q96DF8;F8WEF8	Protein DGCR14	DGCR14			0.0885883	0.260374	12	12	12	37.2	52.567	87.328	0.315935	-0.213588	-0.050114	0.302119
Q08J23;Q08J23-2;Q08J23-3	Q08J23;Q08J23-2;Q08J23-3	tRNA (cytosine(34)-C(5))-methyltransferase	NSUN2			0.0884763	0.374151	47	47	47	73.8	86.47	323.31	0.0259259	-0.147937	0.188274	0.287642
Q14232;F5H0D0;Q14232-2;H0YGG4	Q14232;F5H0D0;Q14232-2	Translation initiation factor eIF-2B subunit alpha	EIF2B1			0.0884319	0.743947	27	27	27	76.7	33.712	211.14	-0.0319598	0.0454429	0.195852	0.144393
Q9H8K7	Q9H8K7	Uncharacterized protein C10orf88	C10orf88			0.0883519	0.18779	5	5	5	15.3	49.248	15.205	-0.0640551	-0.220883	0.0514416	0.586904
Q9NQT8;E7ERX9;H0YBA8;H0Y307;Q9NQT8-2;F2Z2F9	Q9NQT8;E7ERX9	Kinesin-like protein KIF13B;Kinesin-like protein	KIF13B			0.0883372	0.27423	35	35	33	25.2	202.79	105.16	-0.0856966	-0.157303	0.227741	0.368607
O95644-5;O95644-4;O95644-6;O95644;O95644-8;O95644-11;O95644-3;O95644-10;O95644-2;F5H4S8;K7ER53;O95644-17	O95644-5;O95644-4;O95644-6;O95644;O95644-8;O95644-11;O95644-3;O95644-10;O95644-2;F5H4S8;K7ER53;O95644-17	Nuclear factor of activated T-cells, cytoplasmic 1	NFATC1			0.0882393	0.129391	16	14	11	24.5	87.856	63.841	-0.338339	-0.322307	0.601602	0.412002
O15213	O15213	WD repeat-containing protein 46	WDR46			0.0882192	0.279606	18	18	11	38.5	68.07	170.2	0.148129	-0.22705	0.0639171	0.367881
Q14573	Q14573	Inositol 1,4,5-trisphosphate receptor type 3	ITPR3		+	0.0881993	1.6366	56	56	46	26.6	304.1	209.74	0.142815	0.0606008	0.0962619	0.0531195
F5GXX5;P61803;F5H895;A0A0B4J239	F5GXX5;P61803;F5H895;A0A0B4J239	Dolichyl-diphosphooligosaccharide--protein glycosyltransferase subunit DAD1	DAD1			0.0881159	0.196092	3	3	3	37.6	9.5541	8.7432	0.431015	-0.238272	-0.160314	0.320036
Q9NSY1;H0Y9P1;Q9NSY1-2;Q9NSY1-3;K4DI97	Q9NSY1;H0Y9P1;Q9NSY1-2;Q9NSY1-3	BMP-2-inducible protein kinase	BMP2K			0.0881	0.578213	17	17	16	20.7	129.17	93.135	0.00882747	-0.0258525	0.108357	0.261068
P48729;P48729-3;P48729-2;D6REM4;E7ETM0;Q8N752;H0Y9X2;U3KQK7;U3KPX3;U3KQ83;E5RG27;D6RGE5	P48729;P48729-3;P48729-2;D6REM4;E7ETM0;Q8N752	Casein kinase I isoform alpha;Casein kinase I isoform alpha-like	CSNK1A1;CSNK1A1L			0.0879508	0.43184	19	19	19	58.8	38.914	136.55	-0.0528332	-0.0607283	0.229711	0.235654
Q9BRT6	Q9BRT6	Protein LLP homolog	LLPH			0.0879041	0.568342	5	5	5	39.5	15.225	174.3	-0.0350608	-0.0142373	0.206768	0.194146
H0YLN8;Q96QT4;A0A0C4DGL2;Q9BX84-6;Q9BX84-5;Q9BX84-4;Q9BX84-3;Q9BX84-2;Q9BX84	H0YLN8;Q96QT4	Transient receptor potential cation channel subfamily M member 7	TRPM7			0.0878707	0.155547	7	7	7	5.4	212.62	5.8199	0.416442	-0.51237	0.278104	0.169306
Q3B7T1;Q3B7T1-5;Q3B7T1-3;Q3B7T1-4;H0Y353;E9PJ07;H0YCQ0;H0YCS2	Q3B7T1;Q3B7T1-5	Erythroid differentiation-related factor 1	EDRF1			0.0878459	0.44194	27	27	27	26.8	138.53	58.082	-0.0684644	-0.0365555	0.249991	0.206412
O15127;H3BV04;H3BN93;H3BUB6;H3BPL9	O15127	Secretory carrier-associated membrane protein 2	SCAMP2			0.0878037	0.544525	5	5	5	14.6	36.648	196.86	-0.0304066	0.276794	0.0899048	0.0149222
Q8TCS8;H7C3C5;H7BXF6;F8WBI3	Q8TCS8	Polyribonucleotide nucleotidyltransferase 1, mitochondrial	PNPT1			0.0876951	0.431316	49	49	49	67	85.95	323.31	0.0926633	-0.137521	0.132511	0.263127
Q9Y4C8;H0YIL2	Q9Y4C8	Probable RNA-binding protein 19	RBM19			0.087695	0.986296	35	35	35	39.7	107.33	196.86	0.00417537	0.0450235	0.165044	0.136537
P11021	P11021	78 kDa glucose-regulated protein	HSPA5			0.0874753	0.540793	55	55	53	64.5	72.332	323.31	0.25689	0.0831111	-0.0755048	0.0854049
J3QLB2;Q8N1S5-2;Q8N1S5;J3KRX2;J3QS49;J3KTP1;J3QQP1;J3QRN3;J3KS66;J3QLA9	J3QLB2;Q8N1S5-2;Q8N1S5;J3KRX2;J3QS49	Zinc transporter ZIP11	SLC39A11			0.0873883	0.0875994	3	3	3	24.2	19.35	13.688	0.508609	-0.128267	-0.789437	0.758648
Q92890;Q92890-1;Q92890-3;C9JNP9;C9IZG3;C9J6N9	Q92890;Q92890-1;Q92890-3	Ubiquitin fusion degradation protein 1 homolog	UFD1L			0.0873598	0.297649	15	15	15	58.3	34.5	93.823	0.0149222	-0.194509	0.186374	0.342653
Q9P2J5;Q9P2J5-2;Q9P2J5-3;A0A087WXY1	Q9P2J5;Q9P2J5-2	Leucine--tRNA ligase, cytoplasmic	LARS			0.0872891	0.360855	76	76	76	63.3	134.46	323.31	-0.108491	-0.0514739	0.253747	0.255374
O15355	O15355	Protein phosphatase 1G	PPM1G			0.0872887	0.481961	20	20	20	46.9	59.271	315.13	-0.0024506	-0.038273	0.297015	0.0928632
P35606;P35606-2;D6R997;H0YAC7;H0Y938;D6RBT6;D6RBZ7;D6RCL6;D6RBG7	P35606;P35606-2	Coatomer subunit beta	COPB2		+	0.0865878	1.73372	60	60	60	75.7	102.49	323.31	0.116974	0.049352	0.0601858	0.11984
Q96RG2;Q96RG2-2;Q96RG2-4;C9J4R3	Q96RG2;Q96RG2-2;Q96RG2-4	PAS domain-containing serine/threonine-protein kinase	PASK			0.0864753	0.199023	12	12	12	12.4	142.93	21.219	0.461482	0.101784	0.116631	-0.333996
J3KP26;Q86W74-2;Q86W74;E5RHV2;E5RI20;E5RFM7;E5RI04	J3KP26;Q86W74-2;Q86W74;E5RHV2;E5RI20;E5RFM7;E5RI04	Ankyrin repeat domain-containing protein 46	ANKRD46			0.0864727	0.133922	4	4	4	27.2	21.706	11.216	0.43082	-0.368476	-0.256287	0.539834
Q8N4T8;Q8N4T8-2;H0Y962;D6RAV8;D6RJF4;D6RGF2	Q8N4T8;Q8N4T8-2;H0Y962	Carbonyl reductase family member 4	CBR4		+	0.0863877	2.14572	12	12	12	59.1	25.301	116.77	0.112537	0.0855606	0.0968015	0.0506518
E7ET49;Q8NCG7-2;Q8NCG7-4;Q8NCG7	E7ET49;Q8NCG7-2;Q8NCG7-4;Q8NCG7	Sn1-specific diacylglycerol lipase beta	DAGLB			0.086354	0.627758	8	8	8	15.1	68.951	26.144	0.0955429	0.240009	-0.0394735	0.0493376
Q5VST6;Q5VST6-2	Q5VST6;Q5VST6-2	Alpha/beta hydrolase domain-containing protein 17B	ABHD17B			0.0862915	0.605019	7	7	7	36.1	32.214	75.1	0.11832	0.0126402	-0.0278661	0.242072
O00754-2;O00754;M0QZ24;M0R2P5;M0R174;M0QZG6	O00754-2;O00754	Lysosomal alpha-mannosidase;Lysosomal alpha-mannosidase A peptide;Lysosomal alpha-mannosidase B peptide;Lysosomal alpha-mannosidase C peptide;Lysosomal alpha-mannosidase D peptide;Lysosomal alpha-mannosidase E peptide	MAN2B1			0.08604	0.154954	29	29	29	39.1	113.61	250.03	0.55633	0.283922	-0.31811	-0.177981
O00505;H0Y4S9	O00505	Importin subunit alpha-4	KPNA3			0.0860232	1.12162	25	25	17	56	57.81	323.31	0.0322412	0.0409626	0.171719	0.0991699
Q9Y2I7;E9PDH4;Q9Y2I7-4;Q9Y2I7-2;Q9Y2I7-3;F8WEZ0;C9JL08	Q9Y2I7;E9PDH4	1-phosphatidylinositol 3-phosphate 5-kinase	PIKFYVE			0.0859699	1.22243	22	22	22	13.6	237.13	38.768	0.133052	0.0106367	0.130799	0.0693913
Q9UII2;A0A0B4J230;Q9UII2-3;Q9UII2-2	Q9UII2	ATPase inhibitor, mitochondrial	ATPIF1			0.0858032	0.80074	13	13	13	45.3	12.249	70.84	-0.0236102	0.0440444	0.169027	0.153752
O60884;A0A087WT48;I3L320	O60884	DnaJ homolog subfamily A member 2	DNAJA2			0.0857487	0.464518	28	28	28	64.6	45.745	204.51	0.0299415	-0.0978878	0.158337	0.252604
Q96LD8;H3BTJ8;H3BS71;H3BTK5	Q96LD8	Sentrin-specific protease 8	SENP8			0.0856977	0.677017	3	3	3	17.9	24.107	26.273	0.0977798	NaN	-0.00122684	0.16054
Q12830-2;Q12830;Q12830-4;E7ETD6;F5GXF5;A0A0A0MR81;E9PE19;J3KSK9;J3QQQ8;J3QQK4;J3KSY0;F5H176	Q12830-2;Q12830;Q12830-4;E7ETD6;F5GXF5	Nucleosome-remodeling factor subunit BPTF	BPTF			0.0856972	0.347519	66	66	66	24.9	325.12	307	-0.0844725	-0.0858182	0.246226	0.266854
P67809;A0A087X1S2;H0Y449;C9J5V9;Q9Y2T7	P67809;A0A087X1S2;H0Y449	Nuclease-sensitive element-binding protein 1	YBX1			0.0855206	0.769701	25	25	17	74.4	35.924	323.31	-0.0464211	0.0926134	0.178619	0.117271
Q9C0B0;K7EQ93;K7ELF5;A0A0A0MRZ1;E9PDK2	Q9C0B0	RING finger protein unkempt homolog	UNK			0.0853832	0.469851	15	15	15	23.1	88.084	52.703	-0.122076	0.0753272	0.218099	0.170183
O43566	O43566	Regulator of G-protein signaling 14	RGS14			0.0852898	0.429147	23	23	4	53	61.446	158.01	0.199719	-0.0687103	-0.0400667	0.250217
Q9BR76;A9Z1Z3-3	Q9BR76	Coronin-1B	CORO1B		+	0.0851652	2.44956	24	24	13	49.5	54.234	126.27	0.0839208	0.0663992	0.0766959	0.113645
I3L2N2;O14641;I3L2W9;I3L0Z8;I3L0M7;A0A087WWA7;P54792-2;P54792;O14640-2;O14640	I3L2N2;O14641;I3L2W9	Segment polarity protein dishevelled homolog DVL-2	DVL2			0.0851527	0.452801	13	13	12	21.6	78.375	38.678	-0.0469799	-0.0513692	0.222928	0.216032
P06340	P06340	HLA class II histocompatibility antigen, DO alpha chain	HLA-DOA			0.0851518	0.303923	4	4	4	22.4	27.598	17.518	0.364311	-0.121314	-0.058518	0.156129
Q68DH5	Q68DH5	LMBR1 domain-containing protein 2	LMBRD2			0.0851329	0.748164	3	3	3	4.7	81.171	6.3639	0.228824	0.0446039	0.0133551	0.0537483
P68133;P68032;P62736;P63267;A6NL76;P63267-2;F8WB63;B8ZZJ2;C9JFL5;F6UVQ4;F6QUT6	P68133;P68032;P62736;P63267;A6NL76;P63267-2	Actin, alpha skeletal muscle;Actin, alpha cardiac muscle 1;Actin, aortic smooth muscle;Actin, gamma-enteric smooth muscle	ACTA1;ACTC1;ACTA2;ACTG2			0.0851181	0.931145	20	4	4	50.7	42.051	51.153	0.158204	-0.0181912	0.070252	0.130208
Q9BYX4;Q9BYX4-2	Q9BYX4	Interferon-induced helicase C domain-containing protein 1	IFIH1			0.0851101	0.675018	18	18	18	18.8	116.69	46.344	0.0383916	0.0319598	0.024036	0.246053
Q9NYB0;H3BMI8	Q9NYB0	Telomeric repeat-binding factor 2-interacting protein 1	TERF2IP			0.0850566	0.464336	25	25	25	64.7	44.259	293.57	0.0810338	-0.127778	0.188907	0.198063
Q9HCE5;A0A0D9SF88;A0A0D9SFW0;D6RBL4;D6RD73	Q9HCE5	N6-adenosine-methyltransferase subunit METTL14	METTL14			0.0849909	0.624648	14	14	14	29.8	52.15	82.172	0.0512048	-0.0638615	0.174151	0.178469
P56937-3;P56937;P56937-2;Q5T249;F2Z2C2;Q5T248;V9GYN3	P56937-3;P56937;P56937-2	3-keto-steroid reductase	HSD17B7			0.0849403	0.690413	10	10	10	48	34.475	45.195	-0.0147838	0.122606	0.215368	0.0165705
A0A087WUW9;Q9NXU5;A0A0B4J222;R4GN67	A0A087WUW9;Q9NXU5;A0A0B4J222	ADP-ribosylation factor-like protein 15	ARL15			0.0848837	0.554215	5	5	5	30.4	22.876	35.192	0.184015	0.189793	-0.0808812	0.0466081
Q9H6Y2;G3V1J0;Q9H6Y2-2;D6RGJ8	Q9H6Y2;G3V1J0	WD repeat-containing protein 55	WDR55			0.0848736	0.175708	15	15	15	43.3	42.07	103.23	-0.0618453	-0.329831	0.238909	0.492261
F8U8C0;O00220	F8U8C0;O00220	Tumor necrosis factor receptor superfamily member 10A	TNFRSF10A			0.0846156	0.460232	4	4	4	17.4	33.91	11.35	0.110573	-0.101211	0.0614305	0.26767
P61966;H7C1E4;P61966-2	P61966;H7C1E4	AP-1 complex subunit sigma-1A	AP1S1			0.0845637	0.371123	6	6	6	38.6	18.733	22.576	-0.137897	0.0751904	0.3122	0.0887609
O15382;M0QXF9;B3KSI3;M0QZ10;O15382-2;M0QZP4;M0R2K7	O15382;M0QXF9;B3KSI3;M0QZ10;O15382-2;M0QZP4	Branched-chain-amino-acid aminotransferase, mitochondrial;Branched-chain-amino-acid aminotransferase	BCAT2			0.0845552	0.241784	21	21	21	56.9	44.287	229.18	0.0253973	-0.2227	0.108491	0.427033
P25942;A0A087X1D0;H0YE23;P25942-2	P25942;A0A087X1D0;H0YE23;P25942-2	Tumor necrosis factor receptor superfamily member 5	CD40			0.0845068	0.417028	4	4	4	15.2	30.619	20.58	0.158896	0.0370308	-0.121581	0.263681
O00231;O00231-2;J3QS13;J3KSW3	O00231;O00231-2	26S proteasome non-ATPase regulatory subunit 11	PSMD11			0.0844678	0.42575	32	32	21	71.6	47.463	323.31	-0.0647449	-0.0475173	0.218347	0.231786
Q9NQ50	Q9NQ50	39S ribosomal protein L40, mitochondrial	MRPL40			0.084458	0.219333	10	10	10	45.6	24.49	100.57	0.163365	-0.221354	-0.0573016	0.453123
P53992;G5EA31;P53992-2	P53992;G5EA31	Protein transport protein Sec24C	SEC24C			0.0844381	1.03856	39	37	36	42.8	118.32	323.31	0.155984	0.110096	-0.00733303	0.0790055
O60476;H0Y7H1;Q5T9E3;H0Y543	O60476	Mannosyl-oligosaccharide 1,2-alpha-mannosidase IB	MAN1A2			0.0843708	0.526607	7	7	7	14.2	73.003	12.704	0.28186	-0.0171688	0.0423642	0.0304277
O75165;H0Y8Q2;H0YA63	O75165	DnaJ homolog subfamily C member 13	DNAJC13		+	0.0843652	2.45895	90	90	90	49.4	254.41	323.31	0.0867832	0.10809	0.0593554	0.0832329
Q86XZ4;F8VS10;F8VXB3;F8VZS5;F8VXP9;F8VRH4	Q86XZ4;F8VS10	Spermatogenesis-associated serine-rich protein 2	SPATS2			0.0842438	0.309882	12	12	12	30.3	59.544	64.664	0.225042	0.303927	-0.0446872	-0.147307
Q14257;Q14257-2;H0YL43;A8MXP8	Q14257;Q14257-2;H0YL43;A8MXP8	Reticulocalbin-2	RCN2			0.0842266	0.346905	11	11	11	45.4	36.876	80.584	0.0736361	-0.168431	0.130008	0.301693
Q8WYQ5-3;Q8WYQ5;Q8WYQ5-2;C9JSD5	Q8WYQ5-3;Q8WYQ5	Microprocessor complex subunit DGCR8	DGCR8			0.0841628	0.494512	11	11	11	16.2	82.75	21.562	0.11566	-0.0909412	0.0604624	0.25147
P54687-4;P54687;P54687-5;P54687-3;P54687-2;F5H2F2;A0A087WYF2	P54687-4;P54687;P54687-5;P54687-3;P54687-2	Branched-chain-amino-acid aminotransferase, cytosolic	BCAT1			0.0839366	0.263276	21	21	21	49.9	42.837	315.77	-0.190804	-0.0575118	0.312897	0.271165
P55010;H0YLZ1;H0YN40;H0YMJ8;H0YM54;H0YK11;H0YK29	P55010	Eukaryotic translation initiation factor 5	EIF5			0.0839157	0.455485	27	27	27	49.4	49.222	143.73	-0.0739573	0.0747794	0.290778	0.0440624
Q9BU64;Q9BU64-2	Q9BU64;Q9BU64-2	Centromere protein O	CENPO			0.083912	0.144549	8	8	8	34.3	33.785	22.676	0.548924	-0.277919	-0.267201	0.331845
Q6PIJ6;Q6PIJ6-2;Q6PIJ6-3	Q6PIJ6;Q6PIJ6-2;Q6PIJ6-3	F-box only protein 38	FBXO38			0.0838461	1.02472	6	6	6	7.2	133.94	7.4813	0.0356235	0.0840642	NaN	0.131851
A0A0G2JIW1;P0DMV9;P0DMV8	A0A0G2JIW1;P0DMV9;P0DMV8	Heat shock 70 kDa protein 1B;Heat shock 70 kDa protein 1A	HSPA1B;HSPA1A			0.083813	0.185204	38	31	3	69.8	70.108	323.31	-0.182819	-0.231684	0.381726	0.36803
P25398	P25398	40S ribosomal protein S12	RPS12			0.0838061	0.65633	10	10	10	72	14.515	201.28	-0.0378742	0.054779	0.22404	0.0942794
P14735;P14735-2;Q5T5N3	P14735;P14735-2	Insulin-degrading enzyme	IDE		+	0.0838049	2.64581	51	51	51	51.9	117.97	323.31	0.0786551	0.106616	0.0843364	0.0656119
O95630;C9JK83;O95630-2;F5H5B9;C9JEK5;C9JZ93	O95630;C9JK83;O95630-2	STAM-binding protein	STAMBP			0.0837715	0.292229	19	19	19	53.8	48.076	146.05	-0.0954519	-0.125683	0.27011	0.286111
Q5SSJ5;Q5SSJ5-2;Q5SSJ5-3;X6RGJ2;B0QZK4;Q5SWC8;B0QZK9;B0QZK8	Q5SSJ5;Q5SSJ5-2;Q5SSJ5-3;X6RGJ2;B0QZK4;Q5SWC8	Heterochromatin protein 1-binding protein 3	HP1BP3			0.0836688	0.189896	24	24	21	42.3	61.206	82.017	0.205979	-0.296421	-0.0439136	0.46903
Q6P1L8	Q6P1L8	39S ribosomal protein L14, mitochondrial	MRPL14			0.083665	0.260983	8	8	8	55.9	15.947	84.964	0.162024	-0.233888	0.0467006	0.359823
P13639;M0R0I6	P13639	Elongation factor 2	EEF2			0.0835391	0.74684	80	80	79	82.8	95.337	323.31	0.035668	-0.0263226	0.180657	0.144154
A0A0A0MRU8;Q9Y4X4;Q9Y4X4-3;Q9Y4X4-2;P57682	A0A0A0MRU8;Q9Y4X4;Q9Y4X4-3;Q9Y4X4-2	Krueppel-like factor 12	KLF12			0.0834691	0.188323	5	5	5	22.3	41.208	19.993	-0.0359054	-0.28891	0.165558	0.493134
P07900;P07900-2;G3V2J8;Q58FG0;Q14568	P07900;P07900-2	Heat shock protein HSP 90-alpha	HSP90AA1			0.0834584	0.218838	67	48	46	77.5	84.659	323.31	-0.218223	-0.0757024	0.432639	0.195121
Q9H501;A0A087WX71	Q9H501	ESF1 homolog	ESF1			0.083367	0.663078	35	35	35	39.1	98.795	153.07	0.0133487	-0.0238857	0.205643	0.138362
Q96RL7-4;Q96RL7-2;Q96RL7-3;Q96RL7;H0Y7P8	Q96RL7-4;Q96RL7-2;Q96RL7-3;Q96RL7	Vacuolar protein sorting-associated protein 13A	VPS13A			0.0832857	0.404397	31	31	31	13.4	347.67	93.759	0.165742	-0.168366	0.173	0.162767
Q8TEQ6	Q8TEQ6	Gem-associated protein 5	GEMIN5			0.0831636	0.681834	68	68	68	57.4	168.59	323.31	0.0872736	-0.0639671	0.171335	0.138013
H0YA20;P52824;D6RJB4	H0YA20;P52824	Diacylglycerol kinase;Diacylglycerol kinase theta	DGKQ			0.0830911	0.570487	4	4	4	5.6	94.828	8.384	0.154281	-0.024722	NaN	0.119714
P11717;S4R328	P11717	Cation-independent mannose-6-phosphate receptor	IGF2R			0.0830611	0.186006	51	51	51	24.6	274.37	213.32	-0.244034	-0.161879	0.390558	0.347601
Q9Y5J7;G3V502;G3V2F3	Q9Y5J7;G3V502;G3V2F3	Mitochondrial import inner membrane translocase subunit Tim9	TIMM9			0.0828982	0.963487	6	6	6	77.5	10.378	59.345	0.190668	0.0640551	0.0284276	0.0484421
Q6P1X5;H0YC37;H0YEX2;H0YB55	Q6P1X5	Transcription initiation factor TFIID subunit 2	TAF2			0.0827884	0.661266	16	16	16	15.5	136.97	27.615	-0.00518435	-0.0136109	0.169797	0.180152
P24666;P24666-3;G5E9R5;P24666-4;F2Z2Q9	P24666;P24666-3;G5E9R5;P24666-4	Low molecular weight phosphotyrosine protein phosphatase	ACP1			0.0827791	0.840731	14	14	5	77.2	18.042	186.67	0.10656	-0.0041899	0.0395595	0.189187
Q6P1A2;F5H0M4;Q6P1A2-2;F5GYT3;F5H680;F5H7K7;B7Z3N5	Q6P1A2;F5H0M4;Q6P1A2-2	Lysophospholipid acyltransferase 5	LPCAT3			0.0826272	0.15964	7	7	7	19.1	56.034	15.006	0.0761738	-0.399787	0.128294	0.525829
Q5VYH9;Q9HBG7-2;Q9HBG7-4;Q9HBG7;Q9HBG7-3;Q5VYI1;A0A0C4DFU4	Q5VYH9;Q9HBG7-2;Q9HBG7-4;Q9HBG7;Q9HBG7-3;Q5VYI1	T-lymphocyte surface antigen Ly-9	LY9			0.0825635	0.0774711	4	4	4	8.3	62.112	4.8301	0.148369	-0.558283	NaN	0.657605
P46976-2;P46976;C9JQ42;G5E9W8;P46976-3;C9J8R8;C9J7C7	P46976-2;P46976;C9JQ42;G5E9W8;P46976-3	Glycogenin-1	GYG1			0.082534	0.873892	13	13	13	52	37.478	95.2	-0.0253123	0.158725	0.127105	0.0696184
O95905;O95905-3;C9J316;O95905-2;C9JGV1;F2Z2R1	O95905;O95905-3;C9J316;O95905-2	Protein SGT1	ECD			0.0824353	0.195991	10	10	10	22.2	72.757	35.206	-0.0859685	-0.214793	0.12499	0.505513
Q13190;Q13190-2;Q13190-4;Q13190-3;E9PNU4;H7C3X5;E9PP18;E9PRW9;H0YEJ8	Q13190;Q13190-2;Q13190-4;Q13190-3;E9PNU4	Syntaxin-5	STX5			0.0823881	0.846784	17	17	17	61.7	39.672	250.05	0.0294113	0.206143	0.037312	0.0566862
Q96SU4-7;Q96SU4-2;Q96SU4;Q96SU4-6;Q96SU4-3;Q96SU4-5;Q96SU4-4;A0A096LPC8;H0YE19;E9PKX6;H0YCW0;E9PJ80;E9PLH0;E9PNR1;G8JLK0	Q96SU4-7;Q96SU4-2;Q96SU4;Q96SU4-6;Q96SU4-3;Q96SU4-5;Q96SU4-4	Oxysterol-binding protein-related protein 9	OSBPL9		+	0.0823581	1.90345	21	21	19	31	81.165	116.1	0.0678481	0.0507454	0.0892269	0.121612
O15439-2;O15439;O15439-4;O15439-3	O15439-2;O15439	Multidrug resistance-associated protein 4	ABCC4			0.0822955	0.393709	11	10	10	11.6	144.2	47.561	0.0888683	0.0132121	-0.0861245	0.313226
Q9Y5Q8-2;Q9Y5Q8;Q9Y5Q8-3;Q5T7U1;Q5T7U0;Q5T7U4	Q9Y5Q8-2;Q9Y5Q8;Q9Y5Q8-3;Q5T7U1	General transcription factor 3C polypeptide 5	GTF3C5			0.0822261	0.335496	25	25	9	52.3	58.266	148.57	-0.0156403	-0.133068	0.308128	0.169485
Q5VVD7;Q8IWE5	Q5VVD7;Q8IWE5	Pleckstrin homology domain-containing family M member 2	PLEKHM2			0.0821828	0.30615	2	2	2	2.9	110.55	1.9696	-0.0965318	0.0973411	0.245739	NaN
J3KQ32;Q9NTK5;Q9NTK5-2;Q9NTK5-3;C9JCJ9;C9JTK6	J3KQ32;Q9NTK5;Q9NTK5-2;Q9NTK5-3	Obg-like ATPase 1	OLA1			0.0821669	0.655573	32	32	32	76.9	46.937	275.84	0.186278	0.159371	-0.0295734	0.0125918
P23396;P23396-2;E9PL09;E9PPU1;F2Z2S8;H0YCJ7;H0YEU2;E9PQ96;E9PJH4;H0YF32;E9PK82;E9PSF4;E9PQX2;H0YES8	P23396;P23396-2;E9PL09;E9PPU1;F2Z2S8;H0YCJ7;H0YEU2	40S ribosomal protein S3	RPS3			0.0820009	0.674131	30	30	29	86	26.688	323.31	0.0545272	-0.0459824	0.120883	0.198576
Q5T8U5;O15260-2;O15260;O15260-3;B7Z1G8	Q5T8U5;O15260-2;O15260;O15260-3	Surfeit locus protein 4	SURF4			0.0819357	0.337737	7	7	7	41.4	21.127	56.677	0.288505	-0.0370438	-0.122758	0.19904
D6RFG8;P27707;D6RCP9;D6RG38	D6RFG8;P27707;D6RCP9	Deoxycytidine kinase	DCK			0.0818926	0.491381	18	18	18	49.2	36.764	216.55	0.0346331	-0.0801642	0.126312	0.246789
Q86WR0;Q86WR0-2;G3V121;B7Z2L8;Q0VGD4	Q86WR0;Q86WR0-2	Coiled-coil domain-containing protein 25	CCDC25			0.0818075	0.46952	17	17	17	61.5	24.479	94.339	-0.094236	0.0353423	0.240742	0.145382
Q9UJX2;Q9UJX2-3;Q9UJX2-2;D6RBY8;D6RCF8;H0Y936	Q9UJX2;Q9UJX2-3	Cell division cycle protein 23 homolog	CDC23			0.0817844	0.473816	28	28	28	59.3	68.833	129.29	-0.0388575	-0.0400667	0.166972	0.239089
Q13188;Q13188-2;A0A087WZ06;E5RFQ9;Q8NBU1;E5RIM6	Q13188;Q13188-2;A0A087WZ06	Serine/threonine-protein kinase 3;Serine/threonine-protein kinase 3 36kDa subunit;Serine/threonine-protein kinase 3 20kDa subunit	STK3			0.0817691	0.102457	18	10	10	41.3	56.3	16.821	-0.364012	-0.440303	0.6219	0.509491
Q96L92;Q96L92-3;Q96L92-2;A0A0C4DFU6;Q96L92-4;H7C603	Q96L92;Q96L92-3;Q96L92-2;A0A0C4DFU6	Sorting nexin-27	SNX27			0.0817549	0.437683	25	25	25	54.9	61.264	106.4	-0.10608	0.0480967	0.262433	0.12257
O43402;M0R1B0;O43402-2	O43402;M0R1B0	ER membrane protein complex subunit 8	EMC8			0.0815153	1.068	7	7	7	38.6	23.773	28.748	0.0885461	-0.00168891	0.15562	0.0835845
Q6ULP2-5;Q6ULP2-2;Q6ULP2-4;Q6ULP2;Q6ULP2-3;B8ZZI9;A0A0A0MSN6	Q6ULP2-5;Q6ULP2-2;Q6ULP2-4;Q6ULP2;Q6ULP2-3;B8ZZI9	Aftiphilin	AFTPH			0.0814576	0.855242	16	16	16	24.8	99.37	55.362	0.0977025	-0.00309065	0.187007	0.044211
P07910;G3V2Q1;G3V576;G3V555;G3V575	P07910;G3V2Q1;G3V576;G3V555;G3V575	Heterogeneous nuclear ribonucleoproteins C1/C2	HNRNPC			0.0813568	0.179489	25	3	2	72.2	33.67	170.71	0.194493	-0.236265	-0.136062	0.503262
O95551;O95551-2;X6R5A3;O95551-3	O95551;O95551-2;X6R5A3;O95551-3	Tyrosyl-DNA phosphodiesterase 2	TDP2			0.0813497	0.24097	11	11	11	38.1	40.929	55.972	-0.00532813	-0.179858	0.435095	0.0754896
Q8N6T3;F8W1U7;F8VWH9;Q8N6T3-5;Q8N6T3-2;Q8N6T3-3;E5RHT6;E5RHC5;Q8N6T3-4;E5RHH7;H0YIQ0;F8VWB3	Q8N6T3;F8W1U7;F8VWH9;Q8N6T3-5;Q8N6T3-2;Q8N6T3-3;E5RHT6;E5RHC5;Q8N6T3-4	ADP-ribosylation factor GTPase-activating protein 1	ARFGAP1			0.0812865	0.946194	13	13	13	41.6	44.667	135.24	0.0188634	0.0997664	0.0294175	0.177099
P62879;E7EP32;P62879-2;C9JXA5;C9JIS1;C9JZN1	P62879;E7EP32;P62879-2;C9JXA5;C9JIS1	Guanine nucleotide-binding protein G(I)/G(S)/G(T) subunit beta-2	GNB2			0.0812492	0.624355	19	19	9	66.5	37.331	238.55	0.154249	0.090718	0.15782	-0.0777899
B4DJV2;O75390;A0A0C4DGI3;H0YIC4;F8VPA1;H0YH82;F8VRI6;F8VPF9;F8W1S4;F8VRP1;F8VX68;F8W4S1;F8VTT8;F8VZK9;F8VR34;F8W642;F8VWQ5;F8VU34;F8W0J2	B4DJV2;O75390;A0A0C4DGI3	Citrate synthase;Citrate synthase, mitochondrial	CS			0.0810343	0.503038	25	25	19	60.3	50.431	323.31	0.141892	-0.0686649	0.015783	0.235127
Q8WU76;Q8WU76-2;A0A087WUD7	Q8WU76;Q8WU76-2;A0A087WUD7	Sec1 family domain-containing protein 2	SCFD2			0.0810231	0.757794	16	16	16	30.3	75.126	96.732	0.0272631	-0.00114018	0.0931545	0.204815
P49773;D6REP8;D6RE99;D6RD60;D6RC06	P49773	Histidine triad nucleotide-binding protein 1	HINT1			0.0810095	0.747931	12	12	12	84.9	13.802	323.31	-0.033934	0.0882773	0.192699	0.0769954
Q58EX2-2;Q58EX2-3;Q58EX2;Q58EX2-4;H7C2P2	Q58EX2-2;Q58EX2-3;Q58EX2;Q58EX2-4;H7C2P2	Protein sidekick-2	SDK2			0.0809687	0.270576	2	2	2	1.1	211.18	2.5655	0.118163	0.384271	-0.0154471	-0.163112
P23284	P23284	Peptidyl-prolyl cis-trans isomerase B	PPIB			0.0809605	0.789425	20	20	20	57.9	23.742	187.37	0.167669	0.139076	-0.0210283	0.0381248
O14617;O14617-5;O14617-4;O14617-2;O14617-3;A0A087WYN6;K7ELX8;K7ERW8	O14617;O14617-5;O14617-4;O14617-2;O14617-3	AP-3 complex subunit delta-1	AP3D1			0.080958	1.00302	45	45	45	46.4	130.16	255.65	0.0419368	0.0356239	0.182184	0.0640877
P63244;J3KPE3;D6RAC2;H0YAF8;D6RHH4;H0Y8W2;D6REE5;H0YAM7;D6R9Z1;D6R9L0;D6RAU2;E9PD14;D6RFX4;D6RFZ9;D6RBD0;D6RF23;H0Y8R5;D6RGK8;D6RHJ5;D6R909;H0Y9P0;D6RDI0	P63244;J3KPE3;D6RAC2;H0YAF8;D6RHH4;H0Y8W2;D6REE5;H0YAM7;D6R9Z1;D6R9L0;D6RAU2;E9PD14;D6RFX4;D6RFZ9	Guanine nucleotide-binding protein subunit beta-2-like 1;Guanine nucleotide-binding protein subunit beta-2-like 1, N-terminally processed	GNB2L1			0.0808241	0.597607	28	28	28	85.8	35.076	323.31	-0.0270125	0.00388999	0.221444	0.124975
H0YN78;Q9BV29;Q9BV29-2;H0YLN5;H0YM19;H0YLI5;H0YMC0;Q9BV29-3	H0YN78;Q9BV29;Q9BV29-2;H0YLN5;H0YM19;H0YLI5;H0YMC0;Q9BV29-3	Uncharacterized protein C15orf57	C15orf57			0.0806436	0.183701	2	2	2	17.6	19.175	8.3749	0.452728	0.241474	-0.104511	-0.267116
Q9Y3C1;D6RIC3;A0A0C4DGU5;A0A087X2G6;Q9Y3C1-3;Q9Y3C1-2;A0A087X1T1;D6RC60;A0A087WU10	Q9Y3C1;D6RIC3;A0A0C4DGU5;A0A087X2G6;Q9Y3C1-3;Q9Y3C1-2	Nucleolar protein 16	NOP16			0.0805535	0.627491	15	15	15	64	21.188	162.88	0.0938637	-0.0734692	0.181039	0.12078
H7C0S8;O75575;O75575-2;O75575-3	H7C0S8;O75575	DNA-directed RNA polymerase III subunit RPC9	CRCP			0.0803391	0.11158	5	3	3	16.3	34.546	127.17	-0.135272	-0.191392	NaN	0.567682
P26038;V9GZ54	P26038	Moesin	MSN			0.0802479	0.362949	51	39	34	71.2	67.819	323.31	0.112787	0.275961	0.0877344	-0.15549
Q9BRU9;G3XAM4;E5RGP0;Q9BRU9-2;E5RH13;E5RIC4	Q9BRU9	rRNA-processing protein UTP23 homolog	UTP23			0.0802429	0.520085	5	5	5	36.9	28.402	38.622	-0.0409626	-0.021614	0.193835	0.189713
Q9Y6A4;H3BPA3	Q9Y6A4	Cilia- and flagella-associated protein 20	CFAP20			0.0801934	0.984995	14	14	14	78.2	22.774	55.982	0.0382434	0.159758	0.00848693	0.114285
P56182;D6RE82	P56182	Ribosomal RNA processing protein 1 homolog A	RRP1			0.080177	0.357537	12	12	12	27.8	52.839	58.822	0.00789865	-0.115035	0.11836	0.309484
Q9P2R7-2;Q9P2R7;Q5T9Q5;Q5T9Q8	Q9P2R7-2;Q9P2R7;Q5T9Q5	Succinyl-CoA ligase [ADP-forming] subunit beta, mitochondrial	SUCLA2			0.0800094	0.422982	31	31	31	71.2	48.039	300.19	0.0495166	-0.107912	0.1121	0.266333
F2Z2X4;Q9C0E2	F2Z2X4;Q9C0E2	Exportin-4	XPO4		+	0.0799913	1.31351	31	31	31	32.6	130.15	209.33	0.0972702	0.0663992	0.0193461	0.13695
Q9BYG3;C9J808;C9J6C5;H7BZL0	Q9BYG3;C9J808;C9J6C5	MKI67 FHA domain-interacting nucleolar phosphoprotein	NIFK			0.0799297	0.295483	16	16	16	64.2	34.222	150.03	0.108083	-0.184097	0.0617071	0.334025
G3XAN4;Q15629-2;Q15629	G3XAN4;Q15629-2;Q15629	Translocating chain-associated membrane protein 1	TRAM1			0.079882	0.197871	6	6	6	18.1	33.435	108.07	0.367285	-0.0836151	-0.262832	0.298691
Q9Y696;A6PVS0;Q9NZA1-3;O15247;Q9NZA1-2;Q9NZA1;Q96NY7-2;Q96NY7	Q9Y696	Chloride intracellular channel protein 4	CLIC4			0.0797846	1.01021	21	21	21	83.8	28.772	323.31	0.166422	0.00273846	0.0734089	0.0765693
Q8N5G2;Q8N5G2-2;Q8N5G2-3	Q8N5G2;Q8N5G2-2;Q8N5G2-3	Macoilin	TMEM57			0.0797782	0.952341	13	13	13	27	76.177	29.015	0.0315774	0.012068	0.166715	0.108752
Q15257;Q15257-2;A6PVN5;F6WIT2;Q15257-3;Q5T949;Q5T948;A6PVN9;Q15257-4;A6PVN6;Q68CR8;A6PVN8;C9IZ76;A6PVN7;B7ZBQ0;B7ZBP9;B7ZBP7;B4DDQ6;H0Y6E5	Q15257;Q15257-2;A6PVN5;F6WIT2;Q15257-3;Q5T949;Q5T948;A6PVN9;Q15257-4	Serine/threonine-protein phosphatase 2A activator	PPP2R4		+	0.0796481	1.39763	16	16	16	52.8	40.667	99.338	0.0717244	0.0615688	0.145351	0.039948
Q15048;E9PP40;E9PNL0;E9PRP5	Q15048;E9PP40	Leucine-rich repeat-containing protein 14	LRRC14			0.0796003	0.446529	11	11	11	32.7	54.513	28.793	0.166989	0.183836	-0.134176	0.101753
Q6PL24	Q6PL24	Protein TMED8	TMED8			0.079504	0.329915	11	11	11	50.2	35.74	137.83	-0.00417774	-0.0960825	0.0697022	0.348574
Q9UKA8-3;Q9UKA8-2;Q9UKA8	Q9UKA8-3;Q9UKA8-2;Q9UKA8	Calcipressin-3	RCAN3			0.0794332	0.0802026	2	2	2	14.5	20.747	2.3974	-0.103934	-0.374935	NaN	0.717169
P54709;P54709-2;C9JA36;C9JXZ1;H7C4L9;H7C547;F8WBY4;C9J6S2	P54709;P54709-2;C9JA36;C9JXZ1	Sodium/potassium-transporting ATPase subunit beta-3	ATP1B3			0.0794036	0.364789	18	18	18	58.8	31.512	99.436	0.229129	-0.119448	-0.0164682	0.224402
F6WFU6;Q9NZJ7-2;Q9NZJ7;H0Y8C3;Q9NZJ7-3;H7C196	F6WFU6;Q9NZJ7-2;Q9NZJ7;H0Y8C3;Q9NZJ7-3	Mitochondrial carrier homolog 1	MTCH1			0.0792292	0.300503	6	6	6	17.4	39.97	12.594	-0.109962	-0.0906186	0.253626	0.263871
Q13769;F8WCP5;C9JXG5;H7C441;H7C072;C9JCL9;F5GZF3;C9JXU6;F8WES8	Q13769;F8WCP5	THO complex subunit 5 homolog	THOC5		+	0.0792045	1.33667	31	31	31	62.5	78.507	239.13	0.0610291	0.0194884	0.114767	0.121534
Q05823;Q05823-2	Q05823;Q05823-2	2-5A-dependent ribonuclease	RNASEL			0.0791902	0.213958	26	25	25	35.8	83.532	50.183	-0.0859685	-0.22651	0.273576	0.355664
Q13496;Q13496-2;C9J2A2	Q13496;Q13496-2	Myotubularin	MTM1			0.0791478	0.793083	21	21	21	42.6	69.931	143.87	0.0586081	-0.00168891	0.199876	0.0597956
H0Y858;Q9NR96-4;Q9NR96-5;Q9NR96;Q9NR96-3;Q9NR96-2	H0Y858;Q9NR96-4	Toll-like receptor 9	TLR9			0.0790715	0.0859202	18	6	6	15.3	133.52	6.8863	0.574841	-0.480841	NaN	0.143213
O75879;D6REA0;D6RDU9;H0Y8G7;H0Y9F2;B4E0P2;D6RGY4;H0Y9W6	O75879;D6REA0;D6RDU9	Glutamyl-tRNA(Gln) amidotransferase subunit B, mitochondrial	GATB;PET112			0.0789546	0.472556	14	14	14	34.3	61.863	65.059	0.28086	-0.0300446	0.0160683	0.0489345
Q15008;Q15008-4;Q15008-3;Q15008-2;C9J0E9;C9J7B7	Q15008;Q15008-4;Q15008-3;Q15008-2	26S proteasome non-ATPase regulatory subunit 6	PSMD6			0.0788517	0.415429	26	26	22	59.9	45.531	193.88	-0.0270125	-0.0806218	0.198117	0.224924
P56192;P56192-2;H0YIP0;F5H2V6;H0YHV5;H0YI94;F8VS26;F8W0M7;F8W0S4;F8VZZ9;F8VPL7;H0YHL6;H0YI27	P56192;P56192-2	Methionine--tRNA ligase, cytoplasmic	MARS			0.0786054	1.07852	45	45	45	59.3	101.11	323.31	0.0523262	0.0050406	0.139862	0.117193
P62249;M0R210;A0A087WZ27;M0R3H0;M0R1M5;Q6IPX4;M0QX76	P62249;M0R210;A0A087WZ27;M0R3H0;M0R1M5;Q6IPX4	40S ribosomal protein S16	RPS16;ZNF90			0.078605	0.52101	18	18	18	80.1	16.445	33.042	0.025779	-0.0751704	0.182057	0.181755
A6NEP9;Q8NG11-2;Q8NG11;H7BXY6;Q8NG11-3	A6NEP9;Q8NG11-2;Q8NG11;H7BXY6;Q8NG11-3	Tetraspanin;Tetraspanin-14	TSPAN14			0.0784589	0.137262	3	3	3	17	25.196	26.746	-0.318114	-0.223744	0.333309	0.522385
Q9H3D4-9;Q9H3D4-11;Q9H3D4;Q9H3D4-10;Q9H3D4-12;Q9H3D4-2;Q9H3D4-7;Q9H3D4-3;Q9H3D4-8;Q9H3D4-4;Q9H3D4-5;Q9H3D4-6	Q9H3D4-9;Q9H3D4-11;Q9H3D4;Q9H3D4-10;Q9H3D4-12;Q9H3D4-2;Q9H3D4-7;Q9H3D4-3;Q9H3D4-8;Q9H3D4-4;Q9H3D4-5;Q9H3D4-6	Tumor protein 63	TP63			0.078441	0.281968	13	13	13	30.4	67.778	88.959	0.305949	-0.0880554	-0.125652	0.221522
P14324-2;P14324;A0A087WVN4;A0A087X090;A0A087X1D8;A0A087WTP2	P14324-2;P14324;A0A087WVN4;A0A087X090	Farnesyl pyrophosphate synthase	FDPS			0.0783552	0.74354	15	15	15	43.9	40.532	234.56	0.00181894	0.184217	0.122341	0.00504385
Q9H5X1;H0YKV4;Q9H5X1-2;H0YLH6	Q9H5X1;H0YKV4;Q9H5X1-2	MIP18 family protein FAM96A	FAM96A		+	0.0783386	1.69669	6	6	6	36.9	18.355	38.547	0.111212	0.0411028	0.104068	0.0569714
P62280;M0QZC5;M0R1H5;M0R1H6	P62280;M0QZC5	40S ribosomal protein S11	RPS11			0.0782744	0.398069	19	19	19	62	18.431	168.78	-0.0154976	-0.0920941	0.255319	0.16537
C9JSE3;O15287	C9JSE3;O15287	Fanconi anemia group G protein	FANCG			0.0781674	0.182625	2	2	2	7.9	23.693	3.6144	0.242448	0.430928	-0.275961	-0.0847446
O14966;O14966-2;E9PL56;O14966-3	O14966;O14966-2;E9PL56	Ras-related protein Rab-7L1	RAB29			0.078079	0.156185	7	7	7	33.5	23.155	13.74	-0.215617	-0.226105	0.230326	0.523712
Q92882	Q92882	Osteoclast-stimulating factor 1	OSTF1			0.0780015	0.73007	12	12	12	58.4	23.787	201.35	0.0690129	-0.0320641	0.0839282	0.191129
Q96EL3;B9A051	Q96EL3	39S ribosomal protein L53, mitochondrial	MRPL53			0.0779646	0.460234	7	7	7	74.1	12.107	30.876	-0.00647763	-0.0662763	0.143785	0.240827
P60059	P60059	Protein transport protein Sec61 subunit gamma	SEC61G			0.0779217	0.653437	3	3	3	42.6	7.7412	13.973	0.156595	0.130931	-0.0691945	0.0933557
Q9UBK8-2;Q9UBK8;H0Y8S9;D6RAZ2;D6RGC7;D6RF21;H0Y963;H0Y9D5;D6RIS8;D6RAY3;H0Y9Q0;Q9UBK8-3	Q9UBK8-2;Q9UBK8;H0Y8S9	Methionine synthase reductase	MTRR			0.0778798	0.454614	13	13	13	23.1	77.673	46.628	0.0117043	-0.0829121	0.235972	0.146755
A0A087WUK2;O14979	A0A087WUK2;O14979	Heterogeneous nuclear ribonucleoprotein D-like	HNRNPDL		+	0.077867	1.61709	15	14	3	37.2	40.04	162.36	0.0230499	0.0900404	0.0984196	0.0999582
P27987;P27987-2	P27987;P27987-2	Inositol-trisphosphate 3-kinase B	ITPKB			0.077719	0.120406	4	4	3	5.2	102.38	3.9357	-0.272979	0.0223323	NaN	0.483803
Q9Y697-2;Q9Y697;Q9Y697-3;F2Z2E7;A2A2M1;F8WER8;F8WB23;Q8WV90;H7C0I5;H0YGN5	Q9Y697-2;Q9Y697;Q9Y697-3;F2Z2E7	Cysteine desulfurase, mitochondrial	NFS1		+	0.0777123	1.4135	22	22	22	73.3	44.017	254.68	0.0429174	0.0490731	0.0797024	0.139156
A1L0T0;M0R026;E9PJS0;M0QZX5;M0R1B5;E9PL44	A1L0T0;M0R026	Acetolactate synthase-like protein	ILVBL			0.0776084	0.316423	23	23	23	53.5	67.867	266.29	0.0138294	-0.128393	0.0894982	0.335499
O00203-3;O00203;H0YBD0	O00203-3;O00203	AP-3 complex subunit beta-1	AP3B1			0.0775619	1.09023	49	49	40	50	116.19	316.72	0.0409422	0.0237521	0.15782	0.0877335
Q15020;Q15020-4;F8VV04;Q15020-2;H0YHU8;F8W667;F8VZM2;F8VVK9;Q15020-3	Q15020;Q15020-4;F8VV04	Squamous cell carcinoma antigen recognized by T-cells 3	SART3			0.0773515	0.664146	44	44	44	53.3	109.93	323.31	-0.0023065	-0.0145287	0.161049	0.165192
Q9UKG1;C9JAB0;C9K0C4;H0YH86;Q8NEU8-2;Q8NEU8;Q8NEU8-3	Q9UKG1	DCC-interacting protein 13-alpha	APPL1			0.0773246	0.808585	18	18	18	35.7	79.663	90.401	0.129024	0.1038	-0.0444937	0.120969
Q5JRA6;Q5JRA6-2;A0A0A0MRH6;Q5JRA6-4;Q5JRA6-3	Q5JRA6;Q5JRA6-2;A0A0A0MRH6	Melanoma inhibitory activity protein 3	MIA3			0.0773224	0.321824	40	40	40	27	213.7	209.9	0.013538	-0.159557	0.184978	0.27033
Q10570;A0A087X101;E9PIM1;A0A087WTV4	Q10570	Cleavage and polyadenylation specificity factor subunit 1	CPSF1			0.0772772	0.77082	54	54	54	45.4	160.88	323.31	0.0565663	-0.0283369	0.104873	0.176006
Q9ULR5	Q9ULR5	Polyadenylate-binding protein-interacting protein 2B	PAIP2B			0.0771593	0.17998	5	5	5	52.8	14.237	25.817	0.135744	-0.238817	-0.0831107	0.49482
P46783;F6U211;Q9NQ39	P46783;F6U211	40S ribosomal protein S10	RPS10		+	0.0771586	2.05725	15	13	2	66.1	18.898	90.866	0.0575568	0.054779	0.0897694	0.106529
Q4U2R6;A0A087WU28;A0A0B4J2C1;M0R176	Q4U2R6	39S ribosomal protein L51, mitochondrial	MRPL51			0.0771333	0.205629	6	6	6	42.2	15.095	43.307	-0.0817486	-0.235705	0.263996	0.361991
Q9UHY1;F8W6G1;C9JHZ6	Q9UHY1;F8W6G1	Nuclear receptor-binding protein	NRBP1			0.0768065	0.994899	13	13	13	43.9	59.844	148.08	0.113785	-0.0182496	0.0854246	0.126266
Q6P4I2;H0YMT3;H0YMX2;H0YLH0	Q6P4I2;H0YMT3	WD repeat-containing protein 73	WDR73			0.0767651	0.870798	8	8	8	26.7	41.685	16.251	0.091387	-0.0101344	0.0550568	0.170751
P35240-4;P35240-6;P35240-5;P35240-8;P35240-3;P35240;P35240-2	P35240-4;P35240-6;P35240-5;P35240-8;P35240-3;P35240;P35240-2	Merlin	NF2			0.0767575	0.294848	2	2	2	3.9	59.095	5.6214	0.111773	NaN	0.222434	-0.103934
Q9BX95	Q9BX95	Sphingosine-1-phosphate phosphatase 1	SGPP1			0.0766563	0.113711	4	4	4	9.3	49.107	12.004	0.0566113	-0.309538	NaN	0.482896
P53803;E5RGX2	P53803	DNA-directed RNA polymerases I, II, and III subunit RPABC4	POLR2K			0.0766202	0.776558	3	3	3	44.8	7.0041	5.8068	0.0683473	-0.00982928	0.192447	0.0555163
P62854;Q5JNZ5	P62854;Q5JNZ5	40S ribosomal protein S26;Putative 40S ribosomal protein S26-like 1	RPS26;RPS26P11			0.0764985	0.603779	5	5	5	37.4	13.015	49.16	0.00103909	-0.0316806	0.179638	0.156997
Q9H981-2;Q9H981;H0Y849;Q9H981-3;C9J7L6	Q9H981-2;Q9H981;H0Y849	Actin-related protein 8	ACTR8			0.0763942	0.607194	8	8	8	16.2	58.044	11.595	0.0862317	-0.0580975	0.0750534	0.202389
E5RGS2;Q9H6H4;Q9H6H4-2	E5RGS2;Q9H6H4;Q9H6H4-2	Receptor expression-enhancing protein;Receptor expression-enhancing protein 4	REEP4			0.0761491	0.238216	7	7	7	27.1	28.214	9.6285	0.12636	0.0213375	0.373509	-0.21661
P49588;P49588-2;H3BPK7	P49588;P49588-2	Alanine--tRNA ligase, cytoplasmic	AARS			0.0759897	0.369746	61	61	61	75.9	106.81	323.31	-0.108357	-0.0101053	0.258459	0.163963
Q8WUX2	Q8WUX2	Putative glutathione-specific gamma-glutamylcyclotransferase 2	CHAC2			0.0757599	0.365285	9	9	9	50.5	20.874	72.324	-0.0447438	-0.0812627	0.269392	0.159654
Q9GZY8-5;Q9GZY8-2;Q9GZY8;Q9GZY8-4;Q9GZY8-3;C9JHF5;C9JI76;E9PPR7;C9JU19;C9JAF1	Q9GZY8-5;Q9GZY8-2;Q9GZY8;Q9GZY8-4;Q9GZY8-3;C9JHF5	Mitochondrial fission factor	MFF			0.0756775	0.337484	6	6	2	46.2	27.105	31.636	0.197534	-0.134097	-0.00945167	0.248725
Q9UNM6;Q9UNM6-2;A0A087WUL9;J3KNQ3;E9PL38;H0YD73;E9PQG3;E9PPD2;F8W8J6	Q9UNM6;Q9UNM6-2;A0A087WUL9;J3KNQ3;E9PL38;H0YD73	26S proteasome non-ATPase regulatory subunit 13	PSMD13			0.0756762	0.518217	25	25	25	74.5	42.945	323.31	-0.00460935	-0.0504128	0.15562	0.202107
Q9NVH1-3;Q9NVH1;Q9NVH1-2;B1AK20;Q5TH61	Q9NVH1-3;Q9NVH1;Q9NVH1-2	DnaJ homolog subfamily C member 11	DNAJC11			0.0755167	0.217621	25	25	25	57.6	57.196	229.41	-0.0454429	-0.219606	0.185993	0.381122
H0YL18;P61769;H0YLF3;F5H6I0	H0YL18;P61769;H0YLF3;F5H6I0	Beta-2-microglobulin;Beta-2-microglobulin;Beta-2-microglobulin form pI 5.3	B2M			0.0754852	0.372041	5	5	5	50	13.972	79.631	0.0404227	-0.121973	0.110497	0.272994
O43252;O95340;O95340-2	O43252	Bifunctional 3-phosphoadenosine 5-phosphosulfate synthase 1;Sulfate adenylyltransferase;Adenylyl-sulfate kinase	PAPSS1			0.0754128	0.660852	41	41	41	77.9	70.832	323.31	-0.0147838	-0.00193447	0.168128	0.150241
Q15527	Q15527	Surfeit locus protein 2	SURF2			0.0752415	0.203411	5	5	5	23.4	29.647	10.043	-0.0681893	-0.0448658	NaN	0.33878
J9JIE6;Q9UM00-2;Q9UM00;J3QQY2;J3KS45;J3KTQ7	J9JIE6;Q9UM00-2;Q9UM00;J3QQY2;J3KS45	Transmembrane and coiled-coil domain-containing protein 1	TMCO1			0.0752396	0.163063	4	4	4	20.1	27.079	21.031	0.332862	-0.202788	-0.231075	0.401959
P21359;P21359-2;P21359-6;H0Y465;J3KSB5;P21359-4;P21359-3;P21359-5;J3QSG6;J3QQN8;J3KRT8;K7EID4;K7EP94;J3QLS2;J3KSX8	P21359;P21359-2;P21359-6;H0Y465;J3KSB5;P21359-4	Neurofibromin;Neurofibromin truncated	NF1			0.0751544	0.233738	41	41	41	17.3	319.37	112.85	-0.151599	-0.122052	0.267356	0.306912
P48449;P48449-3;P48449-2;A0A0G2JQD0;C9J315;A0A0G2JS81;H7C3A5	P48449;P48449-3;P48449-2;A0A0G2JQD0	Lanosterol synthase	LSS			0.0751384	0.798212	36	36	36	52.5	83.308	179.5	0.0454462	-0.0162201	0.0973411	0.173986
Q9P015;E5RIZ4;E5RHF4	Q9P015;E5RIZ4;E5RHF4	39S ribosomal protein L15, mitochondrial	MRPL15			0.0749465	0.237126	25	25	25	77.7	33.419	185.12	0.110464	-0.241322	0.0835197	0.347123
J3KS94;J3QQK6;P02686-2;P02686;E9PLU9;J3QKN5;E9PLQ9;J3KT34;E9PSE2;F5H7N4;E9PQE7;F8WEU6;E9PNZ1;E9PMR5;H0YF02;E9PKX9;H0YEA2;J3QL64;J3QKL5;A8MZH3;H7BYR8;P02686-6;P02686-5;P02686-4;P02686-3	J3KS94;J3QQK6;P02686-2;P02686	Myelin basic protein	MBP			0.0748946	0.42444	3	3	3	24.5	17.442	5.0905	-0.013498	-0.0424716	0.0779266	0.277621
B7Z6D5;Q96GQ7;A0A087X059;A0A087WYH5	B7Z6D5;Q96GQ7	Probable ATP-dependent RNA helicase DDX27	DDX27			0.0748723	0.741283	39	39	39	48.9	86.604	323.31	0.0146452	-0.0123299	0.136585	0.160588
P49790;P49790-3;P49790-2	P49790;P49790-3;P49790-2	Nuclear pore complex protein Nup153	NUP153			0.0748283	1.09932	62	62	62	52.7	153.94	323.31	0.131819	0.037312	0.0150693	0.115113
P60709;G5E9R0;E7EVS6;C9JZR7;C9JUM1;C9JTX5	P60709	Actin, cytoplasmic 1;Actin, cytoplasmic 1, N-terminally processed	ACTB		+	0.0747325	1.68325	34	34	1	82.9	41.736	323.31	0.0835233	0.106214	0.0275787	0.0816138
D6RF48;Q9P2W9;D6RC71	D6RF48;Q9P2W9	Syntaxin-18	STX18			0.0746806	0.545046	13	13	13	52.3	35.42	90.111	-0.0931544	0.101516	0.16633	0.124031
Q86YS6;Q86YS6-2;C9JFM7;C9JJQ5;A4D1S5;A4D1S5-2	Q86YS6	Ras-related protein Rab-43	RAB43			0.0746507	0.563541	9	9	9	45.3	23.339	23.831	0.0209991	0.0326651	0.00388999	0.241049
A0A087X1B1;Q9Y6K9;Q9Y6K9-2;A0A087X0G7;A0A087WUW6;C9JN51;A0A087WV30;Q9Y6K9-3;C9J2V2;C9JH59;C9JCG6;A0A087X1K7	A0A087X1B1;Q9Y6K9;Q9Y6K9-2;A0A087X0G7;A0A087WUW6;C9JN51	NF-kappa-B essential modulator	IKBKG			0.0744993	0.197582	9	9	9	30.9	48.069	141.77	-0.237931	-0.0742588	0.387032	0.223155
Q68CJ6;C9JSP2	Q68CJ6	Nuclear GTPase SLIP-GC	NUGGC			0.0744124	0.270048	29	29	29	41.6	91.131	82.686	-0.0391385	-0.146132	0.341872	0.141048
O75534;O75534-4;E9PLD4;E9PKN4	O75534;O75534-4	Cold shock domain-containing protein E1	CSDE1			0.0743823	0.414978	53	53	1	64	88.884	323.31	0.0561761	-0.124078	0.207018	0.158413
P42166;P42167-3	P42166	Lamina-associated polypeptide 2, isoform alpha;Thymopoietin;Thymopentin	TMPO			0.0743638	0.67888	46	46	33	75.6	75.491	323.31	0.0911871	-0.0556213	0.0950467	0.166843
Q9Y228-2;Q9Y228;E2QRE5;Q9Y228-3;B1AJU2;C9JBA0;C9J0C0;H0YF09	Q9Y228-2;Q9Y228;E2QRE5;Q9Y228-3;B1AJU2;C9JBA0	TRAF3-interacting JNK-activating modulator	TRAF3IP3			0.0741826	0.116305	8	8	8	18.3	61.374	148.91	0.517895	0.361544	-0.478909	-0.1038
P60842;J3KT12;P60842-2;J3QS69;J3KTB5;J3KSZ0;J3QL43;J3QR64;J3KTN0;J3QLN6;J3KS25;J3QKZ9;J3QL52;J3KS93;J3KT04;J3QQP0;E7EMV8	P60842;J3KT12;P60842-2;J3QS69;J3KTB5;J3KSZ0;J3QL43	Eukaryotic initiation factor 4A-I	EIF4A1			0.0740769	0.9436	42	42	23	76.1	46.153	323.31	-0.00504058	0.0426443	0.136323	0.122381
Q8WV92;H7C3Q6;B8ZZL5;F8WED5	Q8WV92;H7C3Q6;B8ZZL5	MIT domain-containing protein 1	MITD1			0.0740109	0.321266	5	5	5	28.5	29.314	37.32	-0.012068	0.267116	0.178237	-0.137241
E9PK67;E9PNI7;Q53GL7;E9PPE7;E9PJI2;E9PPV8;F8W8G7;E9PM86;E9PSE7;E9PIA6;E9PIK9;E9PSG8;E9PLE8;E9PPU2;E9PQQ6	E9PK67;E9PNI7;Q53GL7;E9PPE7	Poly [ADP-ribose] polymerase 10	PARP10			0.0739649	0.403313	9	9	9	14.1	109.1	27.41	-0.0396999	-0.0601566	0.146134	0.249582
Q9BT40-2;Q9BT40;C9JZB0;I3L0Y0;I3L4A5;I3L2L1	Q9BT40-2;Q9BT40;C9JZB0	Inositol polyphosphate 5-phosphatase K	INPP5K		+	0.0738491	1.55325	7	7	7	27.2	42.783	10.923	0.0419666	0.0701145	0.0568609	0.126454
P63173;J3KT73;J3QL01;J3KSP2	P63173;J3KT73;J3QL01;J3KSP2	60S ribosomal protein L38	RPL38			0.073845	0.926612	4	4	4	50	8.2178	7.0727	0.000144286	0.0468402	0.160662	0.0877335
P51665;H3BNT7;H3BTM8;H3BQV2	P51665;H3BNT7;H3BTM8	26S proteasome non-ATPase regulatory subunit 7	PSMD7			0.073788	0.394133	13	13	13	53.7	37.025	237.5	-0.0220482	-0.0811559	0.1503	0.248057
Q92499;F1T0B3;A0A087X2G1;Q92499-3;Q92499-2	Q92499;F1T0B3;A0A087X2G1;Q92499-3;Q92499-2	ATP-dependent RNA helicase DDX1	DDX1			0.0737766	0.460646	49	49	49	68.4	82.431	323.31	-0.0282861	-0.0524011	0.178492	0.197302
Q96Q05-3;Q96Q05;Q96Q05-2;H0YBR0	Q96Q05-3;Q96Q05;Q96Q05-2;H0YBR0	Trafficking protein particle complex subunit 9	TRAPPC9			0.0736017	0.430517	16	16	16	16.2	127.61	30.946	0.0751248	-0.100082	0.0758749	0.243489
P61011;P61011-2;G3V4F7;G3V480;G3V346;A0A0D9SFN7;G3V3L9	P61011;P61011-2;G3V4F7	Signal recognition particle 54 kDa protein	SRP54			0.0735647	0.289506	30	30	30	61.9	55.704	203.39	-0.138552	-0.0470105	0.284751	0.195071
E7EQ69;B0AZT5;C9J5J3;C9JZU6	E7EQ69;B0AZT5		NAA50			0.0735553	0.679818	14	14	1	73.8	19.311	97.611	-0.0103502	-0.000995779	0.166458	0.139109
A0A087WTM7;P04114	A0A087WTM7;P04114	Apolipoprotein B-100;Apolipoprotein B-48	APOB			0.0734816	0.023451	13	10	10	3.2	489.83	24.328	2.64647	-2.37834	-0.029809	0.0556063
O95396	O95396	Adenylyltransferase and sulfurtransferase MOCS3;Molybdopterin-synthase adenylyltransferase;Molybdopterin-synthase sulfurtransferase	MOCS3			0.0733672	0.835736	11	11	11	36.3	49.669	197.65	0.0071445	0.0116388	0.120485	0.154201
P41250;H7C443;F8WCK4	P41250	Glycine--tRNA ligase	GARS			0.0732258	0.52758	52	52	52	70	83.165	323.31	-0.0695647	0.0382958	0.201634	0.122538
P14921-2;P14921;P14921-3;P14921-5;P14921-4;V9GYD6;P15036	P14921-2;P14921;P14921-3;P14921-5	Protein C-ets-1	ETS1			0.073206	0.478234	11	11	11	50.6	40.786	37.045	-0.0507454	0.101516	0.00345838	0.238596
Q96R06;K7ELC8;J3KTQ0;K7ELG0;E9PMD0;J3QS12;F5GZT2	Q96R06	Sperm-associated antigen 5	SPAG5			0.0732043	0.169324	16	16	16	17.5	134.42	70.097	-0.174023	-0.229264	0.326883	0.369222
A0A024RAC6;Q14241	A0A024RAC6;Q14241	Transcription elongation factor B polypeptide 3	TCEB3			0.0730029	0.603695	13	13	13	18	87.229	29.754	-0.0159258	-0.00953884	0.126973	0.190503
P47897;P47897-2;H7C0R3;C9J165;F2Z2V6	P47897;P47897-2	Glutamine--tRNA ligase	QARS			0.0729942	0.724931	54	53	53	77.2	87.798	323.31	0.012039	-0.0109482	0.167358	0.123528
Q9P2W1;Q9P2W1-2;K7ELD8;K7EQS1;K7ERB6;Q9P2W1-3	Q9P2W1;Q9P2W1-2;K7ELD8;K7EQS1;K7ERB6	Homologous-pairing protein 2 homolog	PSMC3IP			0.0729255	0.207719	6	6	3	37.3	24.906	44.299	-0.321928	0.204391	0.237074	0.172165
O00148;O00148-2;O00148-3;K7EQN7;K7EPJ3;K7EN69;K7ENP6;K7EL56;K7EIL8;F6SXL5	O00148;O00148-2;O00148-3;K7EQN7	ATP-dependent RNA helicase DDX39A	DDX39A		+	0.0729058	1.57554	29	29	9	68.6	49.129	323.31	0.01996	0.0913952	0.0833836	0.0968845
Q9Y5B0;Q9Y5B0-4;A0A0A0MR03;K7EJD2	Q9Y5B0;Q9Y5B0-4;A0A0A0MR03;K7EJD2	RNA polymerase II subunit A C-terminal domain phosphatase	CTDP1			0.0728651	0.247032	28	28	28	33.1	104.4	168.76	0.0690583	-0.193552	0.0550568	0.360897
Q9UHA4;Q9UHA4-2	Q9UHA4;Q9UHA4-2	Ragulator complex protein LAMTOR3	LAMTOR3			0.0727225	0.176391	6	6	6	66.9	13.623	95.783	0.313262	-0.321622	-0.0149806	0.31423
Q9NZ09-2;Q9NZ09;Q9NZ09-4;A0A0D9SG79;Q9NZ09-3	Q9NZ09-2;Q9NZ09;Q9NZ09-4;A0A0D9SG79;Q9NZ09-3	Ubiquitin-associated protein 1	UBAP1			0.0726558	0.190314	8	8	8	26.1	48.246	51.311	-0.200253	-0.142449	0.359634	0.273692
P00491;G3V5M2;G3V2H3;G3V393	P00491;G3V5M2	Purine nucleoside phosphorylase	PNP		+	0.0726285	1.44062	23	23	23	88.6	32.118	323.31	0.0466379	0.0306892	0.0999011	0.113286
Q13469-3;Q13469-4;Q13469-2;Q13469;Q13469-5	Q13469-3;Q13469-4;Q13469-2;Q13469;Q13469-5	Nuclear factor of activated T-cells, cytoplasmic 2	NFATC2			0.0726177	0.238879	23	23	21	31.9	97.691	109.38	0.0579473	-0.231718	0.135009	0.329232
J3KPT4;Q9H4I3;Q9H4I3-2	J3KPT4;Q9H4I3;Q9H4I3-2	TraB domain-containing protein	TRABD			0.0724734	0.260714	16	16	16	50.4	42.692	134.44	0.0220681	-0.183949	0.117695	0.33408
P16615;P16615-5;P16615-2;P16615-3;P16615-4;H7C5W9;J3QSY6;A0A0C4DH86	P16615;P16615-5;P16615-2;P16615-3;P16615-4;H7C5W9	Sarcoplasmic/endoplasmic reticulum calcium ATPase 2	ATP2A2			0.0724023	0.57117	53	53	36	51.2	114.76	323.31	0.185376	-0.0282781	-0.00887091	0.141382
Q5JPE7-2;Q5JPE7;J3KN36;P69849;Q5JPE7-3;A0A0G2JM40;A0A087WTD5;H3BPS9;I3L1G6	Q5JPE7-2;Q5JPE7;J3KN36;P69849;Q5JPE7-3;A0A0G2JM40	Nodal modulator 2;Nodal modulator 3	NOMO2;NOMO3			0.0723939	0.360003	55	55	4	62.8	134.19	323.31	0.144792	-0.114894	0.00432164	0.255357
P62273;P62273-2;A0A087WTT6	P62273;P62273-2;A0A087WTT6	40S ribosomal protein S29	RPS29			0.0723394	0.453456	4	4	4	48.2	6.6767	49.757	-0.00489682	0.0264459	0.268674	-0.000865332
P59768;G3V3J9;G3V2N0;G3V2C9;G3V415	P59768;G3V3J9;G3V2N0;G3V2C9	Guanine nucleotide-binding protein G(I)/G(S)/G(O) subunit gamma-2;Guanine nucleotide-binding protein subunit gamma	GNG2			0.0723167	0.130399	6	6	6	76.1	7.8501	36.462	0.387298	0.196985	-0.5113	0.216284
Q9Y6B7;B1ALD0;B1ALD1;B1ALD2;B1ALD3;Q9Y6B7-2	Q9Y6B7;B1ALD0;B1ALD1	AP-4 complex subunit beta-1;AP complex subunit beta	AP4B1			0.0721836	0.343471	21	21	21	36.3	83.259	36.107	0.00189109	-0.132499	0.215741	0.203602
P0CW22;P08708;H0YN88;A0A075B716;H0YN73;H3BNC9	P0CW22;P08708;H0YN88;A0A075B716	40S ribosomal protein S17-like;40S ribosomal protein S17	RPS17L;RPS17			0.0721785	0.445824	10	10	10	63	15.55	150.22	0.080637	-0.101072	0.0850168	0.224132
Q9NZI8;Q9NZI8-2;REV__M0QZ54;REV__M0R118;Q2L6G8;G8JLG2;Q15517	Q9NZI8;Q9NZI8-2	Insulin-like growth factor 2 mRNA-binding protein 1	IGF2BP1			0.0721246	0.252239	34	34	31	53.7	63.48	323.31	-0.117961	-0.118931	0.24817	0.277219
Q9Y316;Q9Y316-3;Q9Y316-2;B5MCI6	Q9Y316;Q9Y316-3;Q9Y316-2	Protein MEMO1	MEMO1			0.0720601	1.18562	19	19	19	80.5	33.733	212.36	0.120278	0.0219061	0.0353423	0.110713
O00217;E9PPW7;E9PKH6;E9PN51;F8W9K7;Q08E91;H0YDT4	O00217;E9PPW7;E9PKH6;E9PN51;F8W9K7	NADH dehydrogenase [ubiquinone] iron-sulfur protein 8, mitochondrial	NDUFS8			0.0720479	0.927581	11	11	11	49	23.705	64.668	0.0862163	-0.0219069	0.0897694	0.134113
P60228;E5RGA2;H0YBR5;E5RHS5;E5RIT4;H0YAW4;E5RII3;E5RIP5;E5RJ25;H0YBP5	P60228;E5RGA2	Eukaryotic translation initiation factor 3 subunit E	EIF3E			0.0719052	0.907035	33	33	33	72.6	52.22	323.31	0.0250596	0.0117819	0.158854	0.091925
O94913;E9PKN0;E9PQ01;A0A0C4DGU6;E9PQF9;E9PNY7	O94913;E9PKN0;E9PQ01;A0A0C4DGU6	Pre-mRNA cleavage complex 2 protein Pcf11	PCF11			0.0715796	1.24691	42	42	42	33.1	173.05	220.09	0.0904649	0.00848693	0.067088	0.120278
Q6YHU6;Q6YHU6-3;Q6YHU6-2;Q6YHU6-6;Q6YHU6-5;B5MC89;H0Y3V5;F5H3M9;B6ZDE5;H7BYZ4;Q6YHU6-4	Q6YHU6;Q6YHU6-3;Q6YHU6-2;Q6YHU6-6;Q6YHU6-5;B5MC89	Thyroid adenoma-associated protein	THADA		+	0.0715679	2.34067	29	29	29	18.9	219.6	76.689	0.047085	0.0911243	0.0787465	0.0693157
Q9Y3L3;Q9Y3L3-2;F8WEQ3	Q9Y3L3;Q9Y3L3-2	SH3 domain-binding protein 1	SH3BP1			0.0714649	0.367421	27	27	27	44.7	75.712	224.37	-0.0267293	-0.0969772	0.213752	0.195814
L0R6Q1	L0R6Q1		SLC35A4			0.0714388	0.194058	5	5	5	28.2	11.133	7.0209	-0.0976109	-0.222313	0.355016	0.250663
F8WA32;Q9BZW7;B8ZZZ9	F8WA32;Q9BZW7;B8ZZZ9	Testis-specific gene 10 protein	TSGA10			0.0713809	0.76055	3	3	3	5.8	80.379	2.1365	0.0466826	0.0281448	NaN	0.139315
Q8NI27;A0A0C4DG98;H0Y815;Q8NI27-2;F2Z2V2;H0Y7U4;B7ZBA0;H0Y594;H7C477;B7ZB98	Q8NI27;A0A0C4DG98	THO complex subunit 2	THOC2			0.0712743	0.948446	58	58	58	43.6	182.77	323.31	0.0309288	0.00733906	0.0992279	0.147601
Q9ULG1;H0YMN5	Q9ULG1;H0YMN5	DNA helicase INO80	INO80			0.0711611	0.177522	8	8	8	5.7	176.75	32.694	-0.0716254	-0.268834	0.235237	0.389867
Q9H0S4;Q9H0S4-2;F5H1N9	Q9H0S4;Q9H0S4-2	Probable ATP-dependent RNA helicase DDX47	DDX47			0.0711556	0.247599	21	21	21	59.8	50.646	143.98	-0.0419438	-0.167977	0.162081	0.332462
Q9NTM9;Q5TCZ7;A0A0B4J226	Q9NTM9;Q5TCZ7	Copper homeostasis protein cutC homolog	CUTC			0.0710201	0.314931	12	12	12	59.7	29.341	142.2	-0.166201	0.1129	0.264717	0.0726648
X6RKB4;Q9UGC7-3;Q9UGC7;Q5TF45;Q9UGC7-4;Q9UGC7-2	X6RKB4;Q9UGC7-3;Q9UGC7;Q5TF45;Q9UGC7-4;Q9UGC7-2	Peptide chain release factor 1-like, mitochondrial	MTRF1L			0.0708044	0.131295	4	4	4	26.4	25.975	17.235	0.199421	-0.29442	NaN	0.307412
J3KR55;P35236;P35236-2;P35236-3;H7C5I3;E9PE54;E7EUM0;F8WF66;C9IYI6;C9JBA9;H7C4T8;REV__O75330-4;REV__O75330-2;REV__O75330;REV__O75330-3	J3KR55;P35236;P35236-2;P35236-3;H7C5I3	Tyrosine-protein phosphatase non-receptor type 7	PTPN7 / LC-PTP			0.0705395	0.407458	14	14	14	39.2	49.138	76.173	-0.063641	-0.0391621	0.196103	0.188858
Q9NX58;D6RDJ1	Q9NX58	Cell growth-regulating nucleolar protein	LYAR			0.070449	0.563792	22	22	22	52.2	43.614	224.6	0.190931	-0.0564612	0.0377336	0.109592
A0A0A6YYC7;Q96JP5-2;Q96JP5;H3BTR0	A0A0A6YYC7;Q96JP5-2;Q96JP5;H3BTR0	E3 ubiquitin-protein ligase ZFP91	ZFP91-CNTF;ZFP91			0.0704197	0.234599	9	9	9	21.9	59.57	20.823	0.295447	0.0328061	-0.233329	0.186754
Q9Y6I9;C9JXQ7;C9JHH5;A0A087WTU3;C9JL43;C9JUC3;C9J7N0	Q9Y6I9;C9JXQ7;C9JHH5;A0A087WTU3	Testis-expressed sequence 264 protein	TEX264			0.0704129	0.187972	9	9	9	32.6	34.188	33.599	-0.0457225	-0.0818123	-0.0792646	0.488451
P51570;P51570-2;K7EII7;K7ERJ9;K7ERN9	P51570;P51570-2	Galactokinase	GALK1			0.070357	0.384398	31	31	31	76.5	42.272	323.31	0.12122	-0.122695	0.0519985	0.230905
Q9BVJ6;Q9BVJ6-3;Q9BVJ6-2;Q5TAP6;X6RJY0	Q9BVJ6;Q9BVJ6-3;Q9BVJ6-2	U3 small nucleolar RNA-associated protein 14 homolog A	UTP14A			0.0703309	0.259394	36	36	36	51.9	87.977	268.45	0.0913716	-0.217457	0.123004	0.284405
O95999;A0A087WWW9	O95999;A0A087WWW9	B-cell lymphoma/leukemia 10	BCL10			0.0702871	0.441427	7	7	7	42.9	26.251	39.207	-0.014641	-0.0579923	0.126444	0.227337
Q13630;E9PKL9;E9PP14;E9PLH9;H0YCP7;H0YE90;E9PP60	Q13630;E9PKL9;E9PP14	GDP-L-fucose synthase	TSTA3			0.0701944	0.436996	16	16	16	71.3	35.892	164.21	0.130413	0.225522	-0.012068	-0.0630888
Q00169;F5GWE5;I3L4H1;I3L459;I3L4C0;I3L2X8;I3L471;I3NI10;I3L4U7;I3L3W1	Q00169;F5GWE5;I3L4H1;I3L459	Phosphatidylinositol transfer protein alpha isoform	PITPNA			0.0701706	0.413697	23	23	21	74.1	31.806	137.47	-0.131721	0.101112	0.130404	0.180888
O94903;E5RFX7;E5RG77;H0YBG2;E5RFZ4	O94903;E5RFX7;E5RG77	Proline synthase co-transcribed bacterial homolog protein	PROSC		+	0.0701656	2.11669	10	10	10	42.2	30.344	59.146	0.0422191	0.0716254	0.0712136	0.0956045
P49795	P49795	Regulator of G-protein signaling 19	RGS19			0.0698508	0.232644	4	4	4	14.3	24.635	6.782	0.181493	0.237197	-0.267427	0.128141
Q15397;S4R3K8	Q15397	Pumilio domain-containing protein KIAA0020	KIAA0020			0.0697457	0.444666	32	32	32	59.6	73.584	323.31	0.0418924	-0.0898506	0.107688	0.219253
O00487;C9JW37	O00487	26S proteasome non-ATPase regulatory subunit 14	PSMD14			0.0696219	0.33334	17	17	17	81.9	34.577	170.06	0.0319165	-0.136521	0.122871	0.260221
P53621;P53621-2	P53621;P53621-2	Coatomer subunit alpha;Xenin;Proxenin	COPA		+	0.0695401	1.5472	92	92	92	75	138.34	323.31	0.0807439	0.0335111	0.0508847	0.113021
A0A0C4DGP2;A0A0C4DGP5;Q86Y91-2;Q86Y91-3;Q86Y91;Q86Y91-4	A0A0C4DGP2;A0A0C4DGP5;Q86Y91-2;Q86Y91-3;Q86Y91;Q86Y91-4	Kinesin-like protein;Kinesin-like protein KIF18B	KIF18B			0.0694797	0.17933	7	7	6	12.8	91.054	19.2	0.062731	-0.310307	0.143132	0.382363
O00418;H3BRH4	O00418;H3BRH4	Eukaryotic elongation factor 2 kinase	EEF2K			0.0692623	0.179026	25	25	25	39.2	82.143	80.037	-0.153935	-0.162606	0.437654	0.155936
Q9NYY8;Q9NYY8-2	Q9NYY8;Q9NYY8-2	FAST kinase domain-containing protein 2	FASTKD2			0.069226	0.420667	24	24	24	37	81.462	154.4	0.205148	-0.0811863	-0.00482667	0.157769
F8W7C6;A0A087WV22;H7C123;H7C2C5;H7C2U2	F8W7C6;A0A087WV22;H7C123;H7C2C5		RPL10			0.0692029	0.260757	11	1	1	54	18.565	2.2406	0.172669	-0.201062	0.032524	0.272681
H7C613;H7C5T6;Q8N5I4;C9JB06	H7C613;H7C5T6;Q8N5I4;C9JB06	Dehydrogenase/reductase SDR family member on chromosome X	DHRSX			0.0691661	0.278749	3	3	3	60.3	6.7737	11.313	0.130523	0.186754	-0.109779	NaN
Q6ICB0	Q6ICB0	Desumoylating isopeptidase 1	DESI1			0.0691605	0.31289	4	4	4	33.3	18.262	3.9754	-0.174534	0.0659858	0.162726	0.222465
P51809;P51809-3;P51809-2;E5RH06	P51809;P51809-3;P51809-2	Vesicle-associated membrane protein 7	VAMP7			0.0691448	0.650405	14	14	14	49.5	24.935	54.881	0.0549168	-0.0397255	0.0812032	0.180185
P09972;A8MVZ9;J3KSV6;J3QKP5;C9J8F3;J3QKK1;K7EKH5	P09972;A8MVZ9;J3KSV6;J3QKP5	Fructose-bisphosphate aldolase C;Fructose-bisphosphate aldolase	ALDOC			0.0691307	0.636458	30	26	26	88.5	39.455	323.31	-0.0626743	0.111966	0.148088	0.0791428
Q9ULM6	Q9ULM6	CCR4-NOT transcription complex subunit 6	CNOT6			0.0690463	0.164415	8	4	4	18	63.306	7.5233	0.430956	-0.100592	0.204642	-0.25882
Q9UJX5;Q9UJX5-3;Q9UJX5-2;D6RAP6;D6RFM7	Q9UJX5;Q9UJX5-3;Q9UJX5-2	Anaphase-promoting complex subunit 4	ANAPC4			0.068803	0.275928	24	24	24	39.4	92.115	163.29	0.049651	-0.198792	0.205267	0.219085
Q9BQC6	Q9BQC6	Ribosomal protein 63, mitochondrial	MRPL57			0.068625	0.203593	4	4	4	40.2	12.266	7.5854	-0.271784	0.0238941	0.279174	0.243216
P43307;C9J3L8;C9J5W0;E9PAL7;C9IZQ1;P43307-2;C9JBX5	P43307;C9J3L8;C9J5W0;E9PAL7;C9IZQ1;P43307-2	Translocon-associated protein subunit alpha	SSR1			0.0684801	0.186284	5	5	5	29	32.235	61.659	0.431812	0.0621218	-0.230381	0.0103669
P39019;A0A075B6E2;M0R2L9;M0QXK4;M0QYF7;M0R140	P39019;A0A075B6E2	40S ribosomal protein S19	RPS19			0.068421	0.517423	15	15	15	63.4	16.06	58.197	-0.0526941	0.0732718	0.213752	0.0393548
O60488-2;O60488;H0Y9A0;D6RF95;D6RD96;D6RFW9;D6RDA8	O60488-2;O60488	Long-chain-fatty-acid--CoA ligase 4	ACSL4			0.0684031	0.790749	41	41	39	72.4	74.435	323.31	0.0436757	-0.0154471	0.0844725	0.160911
O43324;D6RBD7;C9J1V9;O43324-2;H0YAL7;D6RCQ0;H0YAH9	O43324;D6RBD7;C9J1V9;O43324-2;H0YAL7	Eukaryotic translation elongation factor 1 epsilon-1	EEF1E1;EEF1E1-BLOC1S5			0.0683973	0.771068	12	12	12	83.3	19.81	92.422	-0.00201834	0.0633648	0.174918	0.0373251
Q96MW5;H3BQV3;H3BSH5;A0A087X1T3;H3BMQ9;J3QRV3;H3BUN2	Q96MW5;H3BQV3;H3BSH5	Conserved oligomeric Golgi complex subunit 8	COG8			0.0679491	0.78311	14	14	14	32.7	68.423	61.369	-0.0263043	0.100978	0.0500489	0.147074
Q9Y5J1;J3KSR7;J3QR85;J3QRG0;J3QLD6;F6VJE8	Q9Y5J1	U3 small nucleolar RNA-associated protein 18 homolog	UTP18			0.0677598	0.363317	26	26	26	62.4	62.003	162.31	-0.0542234	-0.0700272	0.19774	0.19755
O75794;X6RA30;H7BZW7;X6RF82;X6RKY7	O75794;X6RA30;H7BZW7	Cell division cycle protein 123 homolog	CDC123			0.0676677	0.127859	14	14	14	43.5	39.134	44.225	-0.229219	-0.29108	0.406537	0.384433
P49761-1;P49761;P49761-3;H3BQG1;H3BNC8;H3BNQ5;H3BUL5;H3BVF8;H3BRW2	P49761-1;P49761;P49761-3	Dual specificity protein kinase CLK3	CLK3			0.067652	0.446454	11	11	7	33.5	58.588	74.195	-0.0226164	0.0210533	0.0197731	0.252398
O15066;O15066-2;F8WAR6;F8WER6;A0A087WX26;O14782;H3BTL6;B7Z896;F5H3M2;A0A0A0MRS8;Q9BVG8-5;Q9BVG8-2;Q9BVG8;Q9BVG8-6;Q9P2E2-3;Q9P2E2	O15066;O15066-2	Kinesin-like protein KIF3B;Kinesin-like protein KIF3B, N-terminally processed	KIF3B			0.06747	0.820724	31	30	30	52.6	85.124	197.94	0.0493376	-0.0218483	0.14104	0.10135
Q6P3W7;F8VSC5;H0YI32;H0YIK6;F8VPW3	Q6P3W7;F8VSC5	SCY1-like protein 2	SCYL2			0.0674031	1.03947	26	26	26	34.9	103.71	135.75	0.0324921	0.0359054	0.148739	0.052476
J3KQ45;F8W8W7;O43493-2;O43493-5;O43493-3;O43493;O43493-4;O43493-6	J3KQ45;F8W8W7;O43493-2;O43493-5;O43493-3;O43493;O43493-4;O43493-6	Trans-Golgi network integral membrane protein 2	TGOLN2			0.0673813	0.119949	6	6	6	15.2	47.879	18.911	0.256115	-0.494393	0.0801119	0.427692
J3QQW9;Q15022	J3QQW9;Q15022	Polycomb protein SUZ12	SUZ12			0.0673124	0.227555	27	27	27	58.7	80.321	182.58	-0.0795658	-0.170475	0.267116	0.252174
P62263;E5RH77;H0YB22	P62263;E5RH77	40S ribosomal protein S14	RPS14			0.0673037	0.426925	10	10	10	67.5	16.273	323.31	0.0227422	-0.0926939	0.141302	0.197865
Q29960-2;Q29960	Q29960-2;Q29960	HLA class I histocompatibility antigen, Cw-16 alpha chain	HLA-C			0.0673009	0.311672	13	9	1	48.5	36.797	138.49	0.00501489	-0.142449	0.167872	0.238766
O14579;A0A087X0I4;M0QXB4;O14579-3;O14579-2;M0R061	O14579;A0A087X0I4;M0QXB4;O14579-3;O14579-2	Coatomer subunit epsilon	COPE			0.0672266	1.09486	21	21	21	80.2	34.482	323.31	0.0532841	0.0931545	0.12075	0.00171777
P62244;I3L3P7;I3L246;H3BV27;H3BT37;I3L303;H3BVC7	P62244;I3L3P7;I3L246	40S ribosomal protein S15a	RPS15A			0.0671697	0.545452	12	12	6	69.2	14.839	323.31	-0.0472592	0.0528332	0.204015	0.0590891
Q92572;F5H459	Q92572	AP-3 complex subunit sigma-1	AP3S1			0.0671121	0.850305	7	7	7	36.8	21.732	20.533	0.0857569	0.148348	0.0468402	-0.0124972
Q9Y5K5-2;Q9Y5K5-4;Q9Y5K5-3;Q5LJA5;Q5LJB0;H0Y636;H0Y4K0	Q9Y5K5-2;Q9Y5K5-4;Q9Y5K5-3;Q5LJA5;Q5LJB0	Ubiquitin carboxyl-terminal hydrolase isozyme L5;Ubiquitin carboxyl-terminal hydrolase	UCHL5			0.0670395	0.986268	21	21	1	81.6	36.079	180.99	0.119793	0.111031	0.0364681	0.000865845
Q2NKJ3;Q2NKJ3-2	Q2NKJ3;Q2NKJ3-2	CST complex subunit CTC1	CTC1			0.06694	0.108011	3	3	3	3	134.61	7.3276	NaN	-0.0721642	0.479127	-0.206143
Q6UWP7-3;Q6UWP7;C9K0C3;Q6UWP7-2	Q6UWP7-3;Q6UWP7	Lysocardiolipin acyltransferase 1	LCLAT1			0.0668798	0.130565	7	7	7	17.6	44.561	21.061	0.112256	-0.302671	-0.098969	0.556903
Q02750;Q02750-2;H3BRW9	Q02750;Q02750-2	Dual specificity mitogen-activated protein kinase kinase 1	MAP2K1			0.0667887	0.665156	27	27	16	75.3	43.439	242.92	0.0144122	-0.0257497	0.131194	0.147298
Q9NVI7-2;Q9NVI7;H0Y2W2;Q9NVI7-3;Q5SV16	Q9NVI7-2;Q9NVI7;H0Y2W2;Q9NVI7-3	ATPase family AAA domain-containing protein 3A	ATAD3A			0.0667442	0.476211	50	50	13	74.2	66.217	323.31	0.0802709	-0.0889144	0.0829751	0.192645
J3QR07;Q96MU7-2;Q96MU7;J3KS01;J3KRG5	J3QR07;Q96MU7-2;Q96MU7	YTH domain-containing protein 1	YTHDC1			0.0665406	0.784884	20	20	20	24.5	85.586	104.09	-0.0354831	0.091666	0.0749164	0.135063
Q96ER9;Q96ER9-2;C9JSW8;C9JPZ8	Q96ER9;Q96ER9-2	Coiled-coil domain-containing protein 51	CCDC51			0.0665096	0.330834	19	19	19	58.2	45.811	116.46	0.0973013	-0.131519	0.0436244	0.256632
Q92581-3;Q92581-2;Q92581;A0A0D9SGH0;A0A0D9SFM4	Q92581-3;Q92581-2;Q92581;A0A0D9SGH0	Sodium/hydrogen exchanger 6	SLC9A6			0.0665023	0.480496	5	5	5	10.8	72.259	23.166	-0.0813395	0.037593	0.180148	0.129608
Q92696;H0YLH3;H0YLG7;H0YMG5;H0YKZ8;H0YKP6	Q92696;H0YLH3	Geranylgeranyl transferase type-2 subunit alpha	RABGGTA			0.0664587	0.755127	27	27	27	60.8	65.071	126.68	0.0195213	0.15549	0.10017	-0.0093472
Q4KMP7;H3BSE1;Q4KMP7-2	Q4KMP7	TBC1 domain family member 10B	TBC1D10B			0.0663831	1.04429	16	16	16	30.7	87.198	153.61	0.0393548	0.0561673	0.0251707	0.14484
Q9H900;Q9H900-2;H3BQ07;H3BSG1	Q9H900;Q9H900-2	Protein zwilch homolog	ZWILCH			0.0662251	0.198975	15	15	15	36.5	67.213	83.377	-0.147698	-0.140444	0.347212	0.20583
A0A0D9SEI3;B7ZVY7;A0A0D9SER5;A0A0D9SEN2;P21127-8;P21127-3;P21127-2;J3QR29;J3QR44;P21127-6;P21127-9;P21127;J3QKR5;P21127-10;P21127-12;P21127-4;P21127-5;Q9UQ88-9;J3KS35;E7ESP2;A0A087WYI9;A0A087X1I0;Q5QPQ9;E9PFJ2;Q13882	A0A0D9SEI3;B7ZVY7;A0A0D9SER5;A0A0D9SEN2;P21127-8;P21127-3;P21127-2;J3QR29;J3QR44;P21127-6;P21127-9;P21127;J3QKR5;P21127-10;P21127-12;P21127-4;P21127-5;Q9UQ88-9	Cyclin-dependent kinase 11B;Cyclin-dependent kinase 11A	CDK11B;CDC2L1;CDK11A			0.0661412	0.42437	37	37	5	38.6	89.437	141.21	-0.0209111	-0.0656571	0.178237	0.172896
Q96SN8-3;Q96SN8-2;Q96SN8;Q96SN8-4;B1AMJ5;A0A0A0MRG9;Q5JTU8;F8WCI3;C9K0C9;F8WF55	Q96SN8-3;Q96SN8-2;Q96SN8;Q96SN8-4;B1AMJ5;A0A0A0MRG9;Q5JTU8	CDK5 regulatory subunit-associated protein 2	CDK5RAP2			0.0660142	0.206081	18	18	18	12.7	210.47	49.471	0.0205159	-0.209745	0.37629	0.0769954
Q9NXG6;Q9NXG6-3;Q9NXG6-2;A0A0C4DGS7;V9GY20;H7C153	Q9NXG6;Q9NXG6-3;Q9NXG6-2	Transmembrane prolyl 4-hydroxylase	P4HTM			0.0659722	0.114245	3	3	3	8.2	56.66	5.4644	-0.190678	-0.0627913	NaN	0.451386
Q9NZB2-6;Q9NZB2;Q9NZB2-4;Q9NZB2-5;A0A0C4DG79;Q9NZB2-2;A0A0C4DH52;Q5T035	Q9NZB2-6;Q9NZB2;Q9NZB2-4;Q9NZB2-5;A0A0C4DG79	Constitutive coactivator of PPAR-gamma-like protein 1	FAM120A			0.0659407	1.01683	44	44	42	51.4	125.27	323.31	0.0834316	-0.00285938	0.0546401	0.128551
Q9BVS4;Q9BVS4-2;H0Y919;H0Y8R4	Q9BVS4;Q9BVS4-2	Serine/threonine-protein kinase RIO2	RIOK2			0.0659377	0.130802	8	8	8	21	63.282	29.301	0.0493673	-0.424513	0.429536	0.209361
Q16543;K7EQA9;K7EKQ2;K7EL68;K7EIU0	Q16543;K7EQA9;K7EKQ2	Hsp90 co-chaperone Cdc37;Hsp90 co-chaperone Cdc37, N-terminally processed	CDC37			0.0658414	0.401665	18	18	18	49.5	44.468	217.66	-0.0779266	-0.00157338	0.225892	0.116974
M0R0F0;P46782;M0R0R2;M0QZN2	M0R0F0;P46782;M0R0R2;M0QZN2	40S ribosomal protein S5;40S ribosomal protein S5, N-terminally processed	RPS5			0.0656146	0.564543	13	13	13	56.5	22.391	100.23	-0.0361869	0.00374607	0.171591	0.123308
Q9NR50;Q9NR50-3;Q9NR50-2;H0Y580;A0A0D9SEN0	Q9NR50;Q9NR50-3;Q9NR50-2;H0Y580	Translation initiation factor eIF-2B subunit gamma	EIF2B3			0.0654772	1.10459	30	30	30	83.2	50.24	302.93	0.0406157	0.0140695	0.0781998	0.129024
D6REL5;Q6UWZ7;A0A087WWJ9;A0A087WZ78;A0A087WXK1	D6REL5;Q6UWZ7;A0A087WWJ9;A0A087WZ78	BRCA1-A complex subunit Abraxas	FAM175A			0.0654404	0.289798	8	8	8	28.1	41.578	10.152	-0.0507454	-0.0919403	0.10675	0.297697
G3V599;O15320-4;O15320-3;O15320-10;O15320;O15320-8;O15320-5;O15320-9;O15320-6;O15320-7;O15320-2;A4FU28;G3V5K6;Q8IX94;Q86UF2;P0CG41;A4D2H0;Q8IX95;G3V4M1;G3V3C4;Q96PC5-2	G3V599;O15320-4;O15320-3;O15320-10;O15320;O15320-8;O15320-5;O15320-9;O15320-6;O15320-7;O15320-2	cTAGE family member 5	CTAGE5			0.0649669	0.297403	28	28	15	23.8	151.72	135.29	-0.149519	0.00230651	0.210638	0.196442
C9J494;Q9H000;Q9H000-2	C9J494;Q9H000;Q9H000-2	Probable E3 ubiquitin-protein ligase makorin-2	MKRN2			0.0647592	0.58739	10	10	10	23.2	46.68	17.868	-0.0717627	0.0908535	0.102457	0.137489
C9J3D7;Q9UKG9;Q9UKG9-3	C9J3D7;Q9UKG9;Q9UKG9-3	Peroxisomal carnitine O-octanoyltransferase	CROT			0.0647114	0.0607946	2	2	2	5.9	65.883	4.7628	0.629612	-0.270173	-0.795709	0.695115
Q9C0J8;Q9C0J8-3;C9J8B4;Q9C0J8-2;B9A053	Q9C0J8	pre-mRNA 3 end processing protein WDR33	WDR33			0.0646921	0.22179	34	34	34	31.4	145.89	154.83	0.161201	-0.137093	-0.0966223	0.331282
Q9Y2T2;H0YBM0	Q9Y2T2	AP-3 complex subunit mu-1	AP3M1			0.0646149	0.278009	21	21	18	66.7	46.939	167.24	0.180953	-0.127116	-0.0483078	0.252931
Q5TEC6	Q5TEC6	Histone H3	HIST2H3PS2			0.0645448	1.20757	9	4	4	53.7	15.43	25.222	0.0525808	0.108759	0.0889556	0.00788429
Q8NBU5;Q8NBU5-2	Q8NBU5;Q8NBU5-2	ATPase family AAA domain-containing protein 1	ATAD1			0.0643791	0.283176	14	14	14	39.1	40.744	74.68	-0.0238941	-0.0935404	0.0617071	0.313244
O95985-3;O95985-2;O95985;H0Y6W0;H7C4B0;C9JEI7;C9JKE2;C9JT00;F2Z2A5;C9JEQ1;C9J9X4	O95985-3;O95985-2;O95985;H0Y6W0	DNA topoisomerase 3-beta-1;DNA topoisomerase	TOP3B			0.0642884	0.381659	22	22	21	41	79.838	114.67	0.0351652	-0.0688162	0.255078	0.0357271
Q9HD26-2;Q9HD26;F5H1Y4;Q9HD26-3	Q9HD26-2;Q9HD26;F5H1Y4;Q9HD26-3	Golgi-associated PDZ and coiled-coil motif-containing protein	GOPC			0.0642718	0.280768	24	24	24	55.9	49.721	113.22	0.301088	0.0806577	-0.123073	-0.00158604
Q8IWA0;F8WE20;F8WC81	Q8IWA0	WD repeat-containing protein 75	WDR75			0.0641757	0.286674	34	34	34	49	94.498	250.8	0.00309065	-0.147713	0.145091	0.256235
P35998;P35998-2;C9JLS9	P35998;P35998-2	26S protease regulatory subunit 7	PSMC2			0.06403	0.410021	37	37	37	79.7	48.633	249.22	-0.0174944	-0.0717851	0.16954	0.175859
Q96F86;H3BPN4;H3BSQ0;H3BPW9;H3BQ37;H3BTD6;H3BQP5;H3BU87;H3BTF8;H3BNJ7;H3BMB8;H3BTH0	Q96F86	Enhancer of mRNA-decapping protein 3	EDC3			0.0639767	0.204001	23	23	23	60.8	56.077	166.11	-0.191689	-0.0797372	0.240131	0.287202
Q99871-3;Q99871;Q99871-2;A6NDA1	Q99871-3;Q99871;Q99871-2;A6NDA1	HAUS augmin-like complex subunit 7	HAUS7			0.0638826	0.158453	6	6	6	24.9	37.524	14.339	0.0909259	-0.348574	0.166715	0.346463
Q8WVC2;P63220;Q9BYK1;Q9BYK2	Q8WVC2;P63220;Q9BYK1	40S ribosomal protein S21	RPS21			0.0637927	0.491617	8	8	8	74.1	8.85	157.22	-0.063779	0.0801119	0.197614	0.0412242
Q4LE39-2;Q4LE39;Q4LE39-3;X6RCR8;Q4LE39-4;H7C5R6;H0Y7Y8	Q4LE39-2;Q4LE39;Q4LE39-3;X6RCR8	AT-rich interactive domain-containing protein 4B	ARID4B			0.0636994	0.586314	15	13	13	16.6	137.61	66.54	0.0401705	0.138159	0.132774	-0.0563061
A0A0G2JKZ1;A2AB90;A0A0G2JH37;A0A0A0MSV9;O15533-2;O15533;O15533-3;Q6P1N7;A0A0A0MT98;O15533-4;C9JA35;A0A0G2JJI5	A0A0G2JKZ1;A2AB90;A0A0G2JH37;A0A0A0MSV9;O15533-2;O15533;O15533-3;Q6P1N7;A0A0A0MT98;O15533-4	Tapasin	TAPBP			0.0636954	0.132177	8	8	8	26.8	47.606	33.361	0.359305	-0.196459	-0.273936	0.365872
Q9NUL5-3;Q9NUL5-4;Q9NUL5;Q9NUL5-2;K7EML3	Q9NUL5-3;Q9NUL5-4;Q9NUL5;Q9NUL5-2	UPF0515 protein C19orf66	C19orf66			0.0636253	0.533862	5	5	3	36.8	18.87	5.8317	-0.0506062	0.0106367	0.154583	0.139887
Q9UBT2;Q9UBT2-2;K7EPL2;K7ESK7;U3KQ93;U3KQ55;K7ES38	Q9UBT2;Q9UBT2-2	SUMO-activating enzyme subunit 2	UBA2			0.0634514	0.540474	35	35	35	68.4	71.223	323.31	0.0106285	-0.0363188	0.188401	0.0910949
Q99797	Q99797	Mitochondrial intermediate peptidase	MIPEP			0.0634459	0.375847	24	24	24	43.3	80.64	68.148	0.265362	0.0102069	-0.0350469	0.0132615
A8MXF1;E9PLZ4;P54829-2;P54829-3;P54829	A8MXF1;E9PLZ4;P54829-2;P54829-3;P54829	Protein-tyrosine-phosphatase;Tyrosine-protein phosphatase non-receptor type 5	PTPN5			0.0633864	0.320181	2	2	2	21.6	19.363	1.9935	0.28379	0.0680517	-0.0486658	-0.0496307
Q9H3H5-2;Q9H3H5;F8W681;F8WE55;Q9H3H5-3	Q9H3H5-2;Q9H3H5;F8W681;F8WE55	UDP-N-acetylglucosamine--dolichyl-phosphate N-acetylglucosaminephosphotransferase	DPAGT1			0.0633734	0.217613	3	3	3	6.2	45.127	3.0434	0.198543	-0.106374	-0.14108	0.302404
Q14789-4;Q14789-3;Q14789;Q14789-2;E7EU81;H0Y867;H7C5I7	Q14789-4;Q14789-3;Q14789;Q14789-2;E7EU81	Golgin subfamily B member 1	GOLGB1		+	0.0633665	1.69239	126	126	126	44.9	367.42	323.31	0.0333185	0.0524158	0.0680517	0.0996799
Q5W111;Q5W111-2	Q5W111;Q5W111-2	SPRY domain-containing protein 7	SPRYD7			0.0630742	0.216664	8	8	8	66.8	21.666	31.532	0.00268593	-0.204034	0.134221	0.319424
Q15050	Q15050	Ribosome biogenesis regulatory protein homolog	RRS1			0.0630036	0.502536	20	20	20	52.6	41.193	283.56	0.00469642	-0.0172273	0.0506061	0.213939
Q8N668-2;Q8N668;E9PE85;H7C169	Q8N668-2;Q8N668	COMM domain-containing protein 1	COMMD1			0.0629519	0.681164	8	8	8	73.6	17.665	115.27	0.179547	0.0356239	0.0060466	0.0305897
Q96HS1;Q96HS1-2;F5GXG4	Q96HS1;Q96HS1-2	Serine/threonine-protein phosphatase PGAM5, mitochondrial	PGAM5			0.0628756	0.509139	20	20	20	63.3	32.004	183.61	0.0744562	-0.075368	0.0781998	0.174214
O15269;O15269-2	O15269	Serine palmitoyltransferase 1	SPTLC1			0.0628726	0.341809	19	19	19	44.8	52.743	164.04	-0.116631	0.00273846	0.194339	0.171044
Q9Y487;Q8TBM3;F5H5F3;F5H847;F5GX48	Q9Y487;Q8TBM3	V-type proton ATPase 116 kDa subunit a isoform 2;V-type proton ATPase subunit a	ATP6V0A2			0.0628082	0.227527	17	17	17	25.6	98.081	58.436	-0.0578315	-0.164884	0.184598	0.289351
A0A087WW40;Q9Y371;Q9Y371-2;Q9Y371-3	A0A087WW40;Q9Y371;Q9Y371-2;Q9Y371-3	Endophilin-B1	SH3GLB1		+	0.0628074	2.06224	18	17	17	43.7	44.26	101.83	0.0714363	0.038998	0.0546401	0.086155
A0A0G2JJQ8;P13762	A0A0G2JJQ8;P13762	HLA class II histocompatibility antigen, DR beta 4 chain	HLA-DRB4			0.0627462	0.0985461	4	4	1	16.9	29.971	7.9415	-0.336626	-0.310969	0.464041	0.434539
Q2KHT3-2;Q2KHT3;H7BZJ9;H7BZI2;H7BXG1	Q2KHT3-2;Q2KHT3	Protein CLEC16A	CLEC16A			0.0626881	0.233879	10	10	10	14.2	103.55	20.405	-0.193835	0.27274	0.171847	0
Q9NSI2-2;Q9NSI2;C9JJU7	Q9NSI2-2;Q9NSI2;C9JJU7	Protein FAM207A	FAM207A			0.0626874	0.368687	8	8	8	43.7	23.944	38.145	0.100592	-0.101118	0.0251707	0.226105
O14523;O14523-2;E9PK05	O14523;O14523-2;E9PK05	C2 domain-containing protein 2-like	C2CD2L			0.062616	0.383643	4	4	4	9.2	76.18	10.712	0.210146	0.132248	-0.0794322	-0.0124972
Q9NUY8;Q9NUY8-2;E9PGE5;C9IZ32;C9JAM5	Q9NUY8;Q9NUY8-2;E9PGE5	TBC1 domain family member 23	TBC1D23			0.0625242	0.214026	16	16	16	30.6	78.321	54.594	-0.105276	0.000432815	-0.0322264	0.387166
Q15052;Q15052-2	Q15052;Q15052-2	Rho guanine nucleotide exchange factor 6	ARHGEF6			0.0624366	0.565304	26	22	22	43	87.498	169.18	-0.0130691	-0.0211308	0.124196	0.15975
P01111;G3V4K2;G3V5T7	P01111	GTPase NRas	NRAS			0.062407	0.631551	10	10	3	71.4	21.229	81.69	0.096175	0.128029	-0.0605478	0.0859713
P62857	P62857	40S ribosomal protein S28	RPS28			0.0622761	0.399325	8	8	8	58	7.8409	224.92	-0.0938305	0.0802483	0.215244	0.0474428
O43765;K7EMD6;K7ERW5	O43765;K7EMD6	Small glutamine-rich tetratricopeptide repeat-containing protein alpha	SGTA			0.0622392	0.220855	14	14	14	42.2	34.063	62.349	-0.149519	-0.0808964	0.306379	0.172994
Q8WVM8;Q8WVM8-2;Q8WVM8-3;J3KNG4;G3V2M8;G3V4I1;G3V5F3;G3V363;H0YJS6;G3V3K9;H0YJY1;G3V5E2;H0YIZ7	Q8WVM8;Q8WVM8-2;Q8WVM8-3	Sec1 family domain-containing protein 1	SCFD1			0.062208	0.554482	36	36	36	70.4	72.379	323.31	0.123434	0.141694	-0.0662159	0.0499198
Q5R3B4;O95563	Q5R3B4;O95563	Mitochondrial pyruvate carrier 2	MPC2			0.0620898	0.191017	5	5	5	44.8	11.681	19.088	0.310969	0.0193461	-0.255064	0.173108
P53618;E9PP73;E9PP63;E9PKQ1	P53618	Coatomer subunit beta	COPB1		+	0.0619133	1.63513	61	61	61	67.6	107.14	323.31	0.0861704	0.0272955	0.0490731	0.085114
P49406;S4R3W9;A0A0A0MRF4;S4R455;H7C2J0	P49406;S4R3W9	39S ribosomal protein L19, mitochondrial	MRPL19			0.0616282	0.185262	18	18	18	52.7	33.535	54.66	0.0852518	-0.249719	0.0556121	0.355368
Q9HB66	Q9HB66		MKKS			0.0615577	0.156449	2	2	2	41.3	7.2634	13.44	0.152869	-0.247097	-0.0757329	0.416192
P10606	P10606	Cytochrome c oxidase subunit 5B, mitochondrial	COX5B			0.0614702	0.126712	7	7	7	51.2	13.696	41.09	0.0348844	-0.389092	0.1503	0.449789
O75554-2;O75554	O75554-2;O75554	WW domain-binding protein 4	WBP4			0.0614435	0.540908	5	5	5	18.6	40.03	27.919	0.198692	0.0150693	0.0487942	-0.0167816
Q9ULX3;H3BUR4	Q9ULX3	RNA-binding protein NOB1	NOB1			0.0612222	0.171523	17	17	17	53.6	46.674	275.37	0.0130285	-0.27446	0.154454	0.351866
Q04446;E9PGM4	Q04446;E9PGM4	1,4-alpha-glucan-branching enzyme	GBE1			0.0611528	0.503821	33	33	33	58.1	80.473	286.68	-0.0532505	0.00662125	0.131458	0.159782
Q9NVM4-3;Q9NVM4;H3BNC0;Q9NVM4-4;H3BPZ8;Q9NVM4-2;H3BSS9;H3BRD3;H3BNS2;H3BRQ9	Q9NVM4-3;Q9NVM4;H3BNC0;Q9NVM4-4;H3BPZ8;Q9NVM4-2	Protein arginine N-methyltransferase 7	PRMT7			0.0611431	0.1113	6	6	6	13.4	73.153	19.055	-0.127765	-0.317912	0.583519	0.106731
C9J2Y9;P30876;C9J4M6;C9JMN3;C9JZW8	C9J2Y9;P30876;C9J4M6	DNA-directed RNA polymerase;DNA-directed RNA polymerase II subunit RPB2	POLR2B			0.0611092	0.574722	66	66	66	60.4	133.06	323.31	0.0196236	-0.0431404	0.1125	0.155454
P52294;C9JYI4;C9JWD9;C9J4U1;C9J352;F2Z3G4	P52294;C9JYI4	Importin subunit alpha-5;Importin subunit alpha-5, N-terminally processed	KPNA1			0.0610305	0.732473	23	23	13	44.4	60.221	249.26	-0.00877375	0.00805652	0.120352	0.124487
Q9UJY5-4;Q9UJY5;Q9UJY5-3;Q9UJY5-6;B0QYR6;Q9UJY5-2;A0A0E3D6L7;B0QYS5;B0QYS3;B0QYS2;B0QYR5;B0QYR9;B0QYS0;B0QYS1;B0QYR8	Q9UJY5-4;Q9UJY5;Q9UJY5-3;Q9UJY5-6;B0QYR6;Q9UJY5-2	ADP-ribosylation factor-binding protein GGA1	GGA1			0.0609687	0.253854	14	12	12	28.8	61.378	86.771	-0.150949	0.204642	0.227495	-0.037312
A6PW57;Q99755-2;Q99755-3;Q99755;Q99755-4;A6PW58;A2A5X0;O14986-3;O14986;O14986-2	A6PW57;Q99755-2;Q99755-3;Q99755;Q99755-4	Phosphatidylinositol 4-phosphate 5-kinase type-1 alpha	PIP5K1A			0.0608599	0.213521	12	12	4	31.8	61.257	67.898	0.227776	-0.237337	0.0432046	0.209795
Q8N6N3;Q8N6N3-2;Q8N6N3-3	Q8N6N3;Q8N6N3-2;Q8N6N3-3	UPF0690 protein C1orf52	C1orf52			0.0608597	0.310904	4	4	4	26.4	20.599	12.058	0.22016	-0.143357	0.0404014	0.126234
O95628-8;O95628-4;O95628-9;O95628-10;O95628-6;O95628-3;O95628-2;O95628;O95628-7;O95628-5	O95628-8;O95628-4;O95628-9;O95628-10;O95628-6;O95628-3;O95628-2;O95628;O95628-7;O95628-5	CCR4-NOT transcription complex subunit 4	CNOT4			0.0608563	0.365218	17	17	17	37.7	70.338	94.16	0.156836	-0.10855	0.0156403	0.179498
O60506;O60506-2;F6UXX1	O60506;O60506-2	Heterogeneous nuclear ribonucleoprotein Q	SYNCRIP			0.0608422	0.781216	36	27	2	63.4	69.602	323.31	0.026984	-0.00945167	0.0827026	0.143134
P18754;P18754-2;C9JW69;C9JRH2;C9JMJ4;C9J3R0;C9JQZ4	P18754;P18754-2;C9JW69;C9JRH2;C9JMJ4;C9J3R0;C9JQZ4	Regulator of chromosome condensation	RCC1			0.0608196	0.468724	26	26	26	69.4	44.969	323.31	-0.00690829	-0.0467273	0.109026	0.187888
Q6I9Y2;A0A024R341;F8WF22;H7C5E3	Q6I9Y2;A0A024R341	THO complex subunit 7 homolog	THOC7;NIF3L1BP1			0.0607796	0.634346	12	12	12	77.5	23.743	98.277	-0.0475383	0.0446039	0.115166	0.130887
Q96H22-4;Q96H22;Q96H22-5;Q96H22-3;H3BMD5;H3BMC7;Q96H22-2;H3BRU7	Q96H22-4;Q96H22;Q96H22-5;Q96H22-3	Centromere protein N	CENPN			0.0606717	1.10702	6	6	6	24.1	37.082	17.457	0.0804692	0.0294175	0.116098	0.0167017
O95163;F5H2T0;H0YDF3	O95163;F5H2T0	Elongator complex protein 1	IKBKAP			0.0605641	0.330331	53	53	53	51.1	150.25	323.31	-0.0754641	-0.0407491	0.238175	0.120294
Q9BYV8;Q9BYV8-2;Q9BYV8-5;C9JXA0;Q9BYV8-3;C9JCX6;F8WF85;C9J9X8;C9IZ34;F8WAV3;C9J6R3;Q9BYV8-4	Q9BYV8;Q9BYV8-2;Q9BYV8-5	Centrosomal protein of 41 kDa	CEP41			0.0605203	0.530195	11	11	11	42.9	41.368	60.459	0.0861704	-0.0809422	0.1129	0.123953
I3L2C7;P57678;I3L399;I3L4A4;I3L4M4;E7EN12;I3L1J7	I3L2C7;P57678	Gem-associated protein 4	GEMIN4			0.0604562	0.588788	32	32	32	33.4	118.82	177.66	0.0967148	-0.0358306	0.0190613	0.161879
H0YMV8;Q71UM5;C9JLI6	H0YMV8;Q71UM5;C9JLI6	40S ribosomal protein S27;40S ribosomal protein S27-like	RPS27L			0.0603889	0.756749	6	6	1	36	11.345	27.562	-0.00834348	0.0119249	0.1141	0.123874
Q9Y221;Q9Y221-2;J3QLW7;J3QRD6;J3QRR4	Q9Y221;Q9Y221-2;J3QLW7	60S ribosome subunit biogenesis protein NIP7 homolog	NIP7			0.0603463	0.259474	14	14	14	85.6	20.462	241.46	-0.0199154	-0.142879	0.134615	0.269564
P30101	P30101	Protein disulfide-isomerase A3	PDIA3			0.0603162	0.343362	48	47	39	78.2	56.782	323.31	0.243865	0.00273846	-0.087059	0.0817206
E7EU96;Q5U5J2;P68400;Q8NEV1;P68400-2;A0A087WY74;V9GYA2;V9GY80;V9GYW6	E7EU96;Q5U5J2;P68400;Q8NEV1;P68400-2	Casein kinase II subunit alpha;Casein kinase II subunit alpha 3	CSNK2A1;CSNK2A3			0.0602042	0.562726	23	23	23	61	45.31	292.61	0.133242	-0.0682716	0.109962	0.0658837
A0A0B4J220;E9PLD3;E9PRG8	A0A0B4J220;E9PLD3;E9PRG8	Uncharacterized protein C11orf98	C11orf98			0.0601337	0.550847	7	7	7	38.2	14.234	30.481	-0.040121	0.088413	0.173	0.0192434
Q8TBB5-3;Q8TBB5;Q8TBB5-2;H3BQH3;H3BV82;Q9UF94;H3BP99;H3BQ90;H3BQL0	Q8TBB5-3;Q8TBB5;Q8TBB5-2;H3BQH3	Kelch domain-containing protein 4	KLHDC4			0.0599956	0.402731	12	12	12	29.2	54.495	53.713	0.238	0.0342158	-0.00536231	-0.0268709
Q12907;D6RBV2;D6RDX1;D6RIU4;D6RBH1	Q12907;D6RBV2;D6RDX1;D6RIU4	Vesicular integral-membrane protein VIP36	LMAN2			0.0598966	0.223903	22	22	22	61.2	40.228	323.31	0.325666	-0.0253826	-0.152468	0.0917713
Q13444-8;Q13444-2;Q13444-7;Q13444-6;Q13444-12;Q13444-5;Q13444-4;Q13444-3;Q13444;Q13444-11;Q13444-13;Q13444-10;Q13444-9	Q13444-8;Q13444-2;Q13444-7;Q13444-6;Q13444-12;Q13444-5;Q13444-4;Q13444-3;Q13444;Q13444-11;Q13444-13;Q13444-10;Q13444-9	Disintegrin and metalloproteinase domain-containing protein 15	ADAM15			0.0598893	0.0782765	3	3	3	5.5	86.139	2.1729	0.522903	-0.349438	NaN	0.00620245
P51116;I3L1Z2	P51116	Fragile X mental retardation syndrome-related protein 2	FXR2			0.0598838	0.690307	27	25	24	48.1	74.222	260.87	0.00200667	-0.00254139	0.0888201	0.15125
Q8N4Q1;Q8N4Q1-2	Q8N4Q1;Q8N4Q1-2	Mitochondrial intermembrane space import and assembly protein 40	CHCHD4			0.0598559	0.306381	6	6	6	51.4	15.996	271.18	0.193503	-0.120812	-0.0157096	0.182442
J3KP15;Q01130;J3QL05;Q01130-2	J3KP15;Q01130;J3QL05;Q01130-2	Serine/arginine-rich splicing factor 2	SRSF2			0.0597131	0.584506	12	12	10	64.2	15.527	187.89	0.0651439	0.112233	0.125254	-0.063779
O00186	O00186	Syntaxin-binding protein 3	STXBP3			0.0595806	0.548886	25	25	25	47.5	67.764	166.39	0.0251918	-0.0358158	0.180403	0.0685439
Q8WV60-3;Q8WV60;F6S289;D6RGK0;Q8WV60-2;E5RHU2;D6RIZ0;B7Z8R2	Q8WV60-3;Q8WV60;F6S289;D6RGK0;Q8WV60-2	Pentatricopeptide repeat-containing protein 2, mitochondrial	PTCD2			0.0595437	0.208506	3	3	3	10.8	30.97	7.2418	-0.172744	-0.0745474	0.243547	0.241919
Q9UBM7;E9PM00;E9PJ54;E9PRL8;E9PQ71;E9PIP9;E9PLZ2;H0YE57	Q9UBM7;E9PM00;E9PJ54	7-dehydrocholesterol reductase	DHCR7			0.0594979	0.263504	8	8	8	17.3	54.489	33.263	0.288805	-0.000808115	-0.128188	0.0781829
Q9NY33;G3V1D3;G3V180;Q9NY33-4;Q9NY33-2;E9PQ14;E9PPK9;E9PKK8;E9PNX5;E9PQF2	Q9NY33;G3V1D3;G3V180;Q9NY33-4	Dipeptidyl peptidase 3	DPP3			0.0594323	1.25575	36	36	36	71.5	82.588	323.31	0.0361708	0.044464	0.117695	0.0393994
Q16186;A0A087WX59;A0A087WUX6	Q16186;A0A087WX59	Proteasomal ubiquitin receptor ADRM1	ADRM1			0.0594008	0.320872	9	9	9	24.6	42.153	67.716	0.0951576	-0.148129	0.0924781	0.198096
Q01804;Q01804-5;Q01804-3;D6RI06;D6RA27;Q01804-4	Q01804;Q01804-5;Q01804-3	OTU domain-containing protein 4	OTUD4			0.0593677	0.348431	20	20	20	22.2	124.04	154.33	0.0566562	0.240864	-0.0889451	0.028896
Q15006;H0YAS9;E5RGJ2	Q15006	ER membrane protein complex subunit 2	EMC2			0.0593241	0.394166	12	12	12	39.1	34.833	108.21	0.0865381	-0.0663066	0.000144286	0.21692
Q9Y3B7;Q9Y3B7-2;Q9Y3B7-3;E9PQB6;H0YCD5	Q9Y3B7;Q9Y3B7-2;Q9Y3B7-3	39S ribosomal protein L11, mitochondrial	MRPL11			0.0593179	0.27303	13	13	13	67.7	20.683	51.995	0.0293966	-0.149281	0.0984196	0.258736
Q92917	Q92917	G patch domain and KOW motifs-containing protein	GPKOW			0.059113	0.654789	25	25	25	60.1	52.228	267.99	0.155566	-0.0311498	0.0668125	0.0452231
Q9BWF3-2	Q9BWF3-2					0.0591032	0.189269	11	2	1	68.4	20.044	5.2731	-0.0429245	-0.166227	0.067914	0.377651
P17096-2	P17096-2	High mobility group protein HMG-I/HMG-Y	HMGA1			0.0590934	0.105805	4	1	1	38.5	10.679	6.6314	0.31955	-0.310397	-0.243728	0.470949
Q9NXW9;Q9NXW9-2	Q9NXW9	Alpha-ketoglutarate-dependent dioxygenase alkB homolog 4	ALKBH4			0.0590526	0.221918	8	8	8	35.8	33.837	17.059	0.0431553	-0.133606	0.341303	-0.014641
A0A087WV46;C9JXA7;Q0VGL1;A0A087X1E5;A0A087WT92	A0A087WV46;C9JXA7;Q0VGL1;A0A087X1E5;A0A087WT92	Ragulator complex protein LAMTOR4;Ragulator complex protein LAMTOR4, N-terminally processed	LAMTOR4			0.0590003	0.571988	2	2	2	20.7	8.8779	3.8796	-0.0639171	0.0592169	0.125651	0.11505
O95777;C9JIZ0;F2Z2Y6;C9JNV3	O95777;C9JIZ0;F2Z2Y6;C9JNV3	U6 snRNA-associated Sm-like protein LSm8	LSM8			0.0589305	0.470494	8	8	8	99	10.403	231.38	-0.0308304	0.10608	0.182947	-0.0224744
A0A087WY55;Q9NP79;Q5TGM0;Q9NP79-2	A0A087WY55;Q9NP79;Q5TGM0;Q9NP79-2	Vacuolar protein sorting-associated protein VTA1 homolog	VTA1			0.0589295	0.393431	14	14	14	47.9	31.102	126.43	-0.0831112	0.0732718	0.211884	0.0336729
P62277;J3KMX5;E9PS50	P62277;J3KMX5	40S ribosomal protein S13	RPS13			0.0588637	0.428668	13	13	13	55.6	17.222	50.125	0.0501888	-0.095435	0.11929	0.161411
Q9BPX7;Q9BPX7-2;C9JF90;C9K0L6	Q9BPX7;Q9BPX7-2	UPF0415 protein C7orf25	C7orf25			0.0588496	0.349309	6	6	6	24.2	46.45	11.815	0.00977122	0.174406	0.161049	-0.109829
Q86VP6;Q86VP6-2;A0A0C4DGH5;H0YH27;Q86VP6-3;F5H6I6	Q86VP6;Q86VP6-2;A0A0C4DGH5	Cullin-associated NEDD8-dissociated protein 1	CAND1			0.058557	0.827564	70	70	68	64	136.37	323.31	0.0010824	0.125519	0.0936954	0.0139314
Q495G5;Q8IVH4;D6RIS5	Q495G5;Q8IVH4	Methylmalonic aciduria type A protein, mitochondrial	MMAA			0.0584735	1.14972	9	9	9	26.7	47.135	19.971	0.0219361	0.113034	0.0275787	0.0713455
P60866;P60866-2;G3XAN0;E5RJX2;E5RIP1	P60866;P60866-2;G3XAN0	40S ribosomal protein S20	RPS20			0.0584596	0.413808	7	7	7	52.9	13.373	30.44	0.039948	-0.0942795	0.115566	0.172604
Q9NRX2;E9PKV2	Q9NRX2;E9PKV2	39S ribosomal protein L17, mitochondrial	MRPL17			0.0583628	0.311379	13	13	13	58.3	20.05	150.17	-0.0180643	-0.109701	0.15017	0.211047
Q14156-2;Q14156;Q14156-3;E5RJS1	Q14156-2;Q14156;Q14156-3	Protein EFR3 homolog A	EFR3A			0.058145	0.304456	5	5	5	7.4	88.8	11.636	0.0396514	-0.124126	0.0740944	0.24296
O75146;O75146-2;H0YH66	O75146;O75146-2	Huntingtin-interacting protein 1-related protein	HIP1R			0.0580717	0.169079	51	51	49	52.5	119.39	186.35	-0.205267	-0.0966686	0.342896	0.191327
Q9NWH9;H7C3F4;Q9NWH9-3;H7BXE3;H0YMM0;H0YL55;H0YKH2;H0YNF3;H0YMR6;H0YLE6;H0YKU6;H0YLW7;H0YMW8	Q9NWH9;H7C3F4;Q9NWH9-3	SAFB-like transcription modulator	SLTM		+	0.0580054	1.39928	44	43	43	41.2	117.15	323.31	0.0238271	0.0506061	0.0539454	0.103643
Q96QP1;Q96QP1-2;B3KUH8;B4E0R2;D6RDN6;D6RB29	Q96QP1;Q96QP1-2	Alpha-protein kinase 1	ALPK1			0.0579538	0.164624	7	7	7	7.3	138.86	7.0276	-0.284514	0.311619	0.18954	0.0151702
K7EM09;K7EPR0;K7ELQ9;Q6UW68	K7EM09;K7EPR0;K7ELQ9;Q6UW68	Transmembrane protein 205	TMEM205			0.0576052	0.0956507	5	5	5	29.2	13.389	45.924	0.349364	-0.359102	-0.244856	0.485014
Q5TFE4;Q5TFE4-2;Q5QPD0;H0YDA5	Q5TFE4;Q5TFE4-2	5-nucleotidase domain-containing protein 1	NT5DC1			0.0575356	0.802716	23	23	23	66.6	51.844	216.99	0.0940793	0.121413	0.0278618	-0.0132121
Q7L1Q6;Q7L1Q6-4;Q7L1Q6-3;Q7L1Q6-2;C9IZ80;C9JFN4;H0Y503;C9J188;C9JWF5;C9JV57	Q7L1Q6;Q7L1Q6-4;Q7L1Q6-3;Q7L1Q6-2;C9IZ80	Basic leucine zipper and W2 domain-containing protein 1	BZW1			0.0574979	0.682369	25	24	24	62.5	48.043	178.46	0.00685457	0.00331442	0.157303	0.06252
Q9P031;F8VNY5	Q9P031;F8VNY5	Thyroid transcription factor 1-associated protein 26	CCDC59			0.0574955	0.081549	6	6	6	27	28.669	21.072	-0.262794	-0.403542	0.66421	0.232108
Q9BXK5;A0A087WX97;Q9BXK5-2;A0A087WTL4;E9PDD6;Q9BXK5-4;F2Z2C3;A0A087WW80;A0A0A0MR90;F6VJB4	Q9BXK5;A0A087WX97;Q9BXK5-2;A0A087WTL4	Bcl-2-like protein 13	BCL2L13			0.0574504	0.299175	14	14	14	42.3	52.723	91.487	0.0600514	-0.12677	0.0533895	0.24313
Q5TC82-2;Q5TC82;A6NHN2;Q9HBD1-2;Q9HBD1-3;Q9HBD1-6;Q9HBD1-4;Q9HBD1	Q5TC82-2;Q5TC82	Roquin-1	RC3H1			0.0573394	0.711892	10	10	10	10.9	124.84	37.762	0.0828661	-0.0221999	0.138028	0.0306634
O43808;B0QYW5;F6RTR7;F8WE74;F8WA85;B1AHN4;F8WEC6	O43808;B0QYW5;F6RTR7;F8WE74	Peroxisomal membrane protein PMP34	SLC25A17			0.0573388	0.268522	6	6	6	23.8	34.566	18.861	0.0288372	-0.117193	0.0352017	0.282509
A0A087WWS1;Q96FV9;Q96FV9-2;A0A087WY84;R4GMN4;J3KT14;R4GN58;J3KRD7;J3QQZ3	A0A087WWS1;Q96FV9;Q96FV9-2;A0A087WY84	THO complex subunit 1	THOC1			0.0571455	0.381631	39	39	39	62.4	75.651	282.83	-0.00115369	-0.0682564	0.0854246	0.212568
Q01543;Q01543-3;Q01543-2;Q01543-4;A0A0A0MSR4;V9GY62;V9GZ02;A0A0C4DG41;B5MDW0;A8MX39;A8MZ24;P11308-2;P11308-1;P11308-4;P11308	Q01543;Q01543-3;Q01543-2	Friend leukemia integration 1 transcription factor	FLI1			0.0571415	0.193537	13	13	13	46.9	50.981	106.99	0.240742	0.160146	-0.260515	0.0881933
P47224	P47224	Guanine nucleotide exchange factor MSS4	RABIF			0.0566076	0.193006	4	4	4	35.8	13.839	7.3733	-0.094236	-0.0795847	0.375735	0.0245166
P55735;A0A0C4DFR6;P55735-3;E7ERC8	P55735;A0A0C4DFR6;P55735-3	Protein SEC13 homolog	SEC13			0.0566058	0.519585	14	14	1	63.7	35.54	225.1	0.177898	0.0754641	-0.0160159	-0.0109229
O15116;E5RJ47;E5RH18	O15116	U6 snRNA-associated Sm-like protein LSm1	LSM1			0.0565673	0.274117	6	6	6	65.4	15.179	113.35	-0.0309717	-0.0671527	0.0354831	0.28891
P43034;I3L3N5;P43034-2;I3L495	P43034	Platelet-activating factor acetylhydrolase IB subunit alpha	PAFAH1B1			0.0564868	0.893862	31	31	31	76.3	46.637	274.66	-0.0113525	0.0458623	0.117695	0.0737425
O60271-4;A0A087X2D8;O60271-2;O60271;O60271-9;O60271-5;O60271-3;E9PFH7;A0A087WYG2;Q9UPT6;H0YBE9;D6RHI8;H0YBS5;Q9UPT6-2;H0Y981	O60271-4;A0A087X2D8;O60271-2;O60271;O60271-9;O60271-5;O60271-3	C-Jun-amino-terminal kinase-interacting protein 4	SPAG9			0.0563542	0.140066	63	63	63	58.4	144.68	323.31	-0.218223	-0.17184	0.315102	0.300377
[truncated: 4,211 more rows]
