# Supplementary material for: Quantitative proteomics identifies PTP1B as modulator of B cell antigen receptor signaling
Source: Life Sci Alliance. 2021 Sep 15;4(11):e202101084. doi: 10.26508/lsa.202101084 (PMC8473724; doi:10.26508/lsa.202101084)
Supplement: Supplementary file 13 [file LSA-2021-01084_TableS10.xlsx]

## Sheet: Information
	Quantitative Proteomics Identifies PTP1B as Modulator of B Cell Antigen Receptor Signaling
	Jennifer J. Schwarz, Lorenz Grundmann, Thomas Kokot, Kathrin Kläsener, Sandra Fotteler, David Medgyesi, Maja Köhn, Michael Reth, Bettina Warscheid
Supplemental Table 10	Plasmids and Peptides
Sheet 1	Information
Sheet 2	pMIG plasmids with PTP1B
Sheet 3	plasmids of the inducible system
Sheet 4	CD22 plasmids
Sheet 5	Peptides of the phosphatase assay

## Sheet: pMIG PTP1B
pMIG plasmids
Primer sequence forward 5'-3'	Primer sequence reverse 5'-3'	Method	PCR Template	Origin of template	New plasmid
GCATGAATTCCTATGTGTTGCTGTTGAACAG	CAAAAACCGAAATAGGTTCAGAGACGTCAGTC	Fusion PCR + EcoRI Restriction Digest	pMIG FLAG-PTP1B-D181A	Medgyesi et al 2014 DOI: 10.1084/jem.20131196	pMIG FLAG-PTP1B-D181A-Y46F
GACTGACGTCTCTGAACCTATTTCGGTTTTTG	TAAGCCTCCGCCTCCTCT		pMIG FLAG-PTP1B-D181A
TAAGCCTCCGCCTCCTCT	GAATTCCTAGTAACTCAGTGCATGGTCCTC	PCR + EcoRI Restriction Digest	pMIG FLAG-PTP1B-D181A-Y46F		pMIG FLAG-PTP1B truncated TM

## Sheet: inducible PTP1B
inducible PTP1B constructs
Primer sequence forward 5'-3'	Primer sequence reverse 5'-3'	Method	PCR Template	Origin of template	New plasmid
CGTTCATCCATAGTTGCCTGAC	CACTGGTCAACTTGGCCATGGTTGTGGCCATATTATCATCGT	Gibson cloning	SH582	Haug et al. 2015 DOI: 10.1002/ijc.29289	SH582 Bleomycin
CCGAGGAGCAGGACTGAGCACTTCGTGGCCGAG	GGAGTCAGGCAACTATGGA	Gibson cloning	SH582
ACGATGATAATATGGCCACAACCATGGCCAAGTTGACCAGTG	CTCGGCCACGAAGTGCTCAGTCCTGCTCCTCGG	Gibson cloning	pGIPZ non silencing	OpenBiosystems, Huntsville, USA
CGTTCATCCATAGTTGCCTGAC	TTCCTGTTCAACAGCAACACATAGACGAATTCCGCCCCTCTC	Gibson cloning	pSH461MK-EV-GFP	Haug et al. 2015 DOI: 10.1002/ijc.29289	pSH461MK-EV-GFP-FLAG-PTP1B WT
ATCGTCATCGTCTTTGTAGTCCATTAGCTTGGTACCTAAGCGTAGTCT	GGAGTCAGGCAACTATGGA	Gibson cloning	pSH461MK-EV-GFP
GAGAGGGGCGGAATTCGTCTATGTGTTGCTGTTGAACAGGAA	AGACTACGCTTAGGTACCAAGCTAATGGACTACAAAGACGATGACGAT	Gibson cloning	pMIG FLAG-PTP1B	Medgyesi et al 2014 DOI: 10.1084/jem.20131196
CGTTCATCCATAGTTGCCTGAC	TTCCTGTTCAACAGCAACACATAGACGAATTCCGCCCCTCTC	Gibson cloning	pSH461MK-EV-GFP		pSH461MK-EV-GFP-FLAG-PTP1B D181A-Y46F
ATCGTCATCGTCTTTGTAGTCCATTAGCTTGGTACCTAAGCGTAGTCT	GGAGTCAGGCAACTATGGA	Gibson cloning	pSH461MK-EV-GFP
GAGAGGGGCGGAATTCGTCTATGTGTTGCTGTTGAACAGGAA	AGACTACGCTTAGGTACCAAGCTAATGGACTACAAAGACGATGACGAT	Gibson cloning	pMIG FLAG-PTP1B D181A-Y46F
CGTTCATCCATAGTTGCCTGAC	AGGACCATGCACTGAGTTACTAGACGAATTCCGCCCCTCTC	Gibson cloning	pSH461MK-EV-GFP		pSH461MK-EV-GFP-FLAG-PTP1B truncated TM
ATCGTCATCGTCTTTGTAGTCCATTAGCTTGGTACCTAAGCGTAGTCT	GGAGTCAGGCAACTATGGA	Gibson cloning	pSH461MK-EV-GFP
GAGAGGGGCGGAATTCGTCTAGTAACTCAGTGCATGGTCCT	AGACTACGCTTAGGTACCAAGCTAATGGACTACAAAGACGATGACGAT	Gibson cloning	pMIG FLAG-PTP1B truncated TM

## Sheet: CD22
CD22 constructs
Primer sequence forward 5'-3'	Primer sequence reverse 5'-3'	Method	PCR Template	Origin of template	New plasmid
AAAAACTCATCTCAGAAGAGGATCTGTGACTTAATTAACAATTCCGCCCC (myc)	GGAGTCAGGCAACTATGGA	Gibson cloning	pMICD8 mb1 FLAG	Herzog and Jumaa 2007 DOI: https://doi.org/10.4049/jimmunol.178.4.2336; Infantino et al, DOI: 10.1084/jem.20091303	pMICD8 human CD22-Myc
CGTTCATCCATAGTTGCCTGAC	CCTCGAGAGATCTAATTCCGGC	Gibson cloning	pMICD8 mb1 FLAG
CTCTAGGCGCCGGAATTAGATCTCTCGAGGATGCATCTCCTCGGCCC (myc)	CTTCTGAGATGAGTTTTTGTTCTCCGGAATGTTTGAGGATCACATAGTCC	Gibson cloning	pMSCV Twin Strep human CD22	Lars Nitschke, University of Erlangen, Germany, DOI: https://doi.org/10.4049/jimmunol.1900925
CACTCCCTGGGATGCTTCAATCCAATGATG	CATCATTGGATTGAAGCATCCCAGGGAGTG	Site directed mutagenesis	pMICD8 human CD22-Myc		pMICD8 human CD22-Myc Y752F
GAAGATGGCATTAGCTTCACCACCCTGCGCTTTC	GAAAGCGCAGGGTGGTGAAGCTAATGCCATCTTC	Site directed mutagenesis	pMICD8 human CD22-Myc		pMICD8 human CD22-Myc Y762F
GCGATGACACGGTCACTTTTTCAGCATTGCACAAGC	GCTTGTGCAATGCTGAAAAAGTGACCGTGTCATCGC	Site directed mutagenesis	pMICD8 human CD22-Myc		pMICD8 human CD22-Myc Y796F
CAAGTGGGCGACTTTGAGAACGTCATTCC	GGAATGACGTTCTCAAAGTCGCCCACTTG	Site directed mutagenesis	pMICD8 human CD22-Myc		pMICD8 human CD22-Myc Y807F
GAAGATGAGGGGATTCATTTCTCAGAGCTGATCCAG	CTGGATCAGCTCTGAGAAATGAATCCCCTCATCTTC	Site directed mutagenesis	pMICD8 human CD22-Myc		pMICD8 human CD22-Myc Y822F
ACAAGAAAATGTGGACTTTGTGATCCTCAAACATTC	GAATGTTTGAGGATCACAAAGTCCACATTTTCTTGT	Site directed mutagenesis	pMICD8 human CD22-Myc		pMICD8 human CD22-Myc Y842F

## Sheet: Peptides
Synthesized phosphopeptides
CD22 11-mer peptide	Phosphosite
EDGISpYTTLRF	762
DDTVTpYSALHK	796
RQVGDpYENVIP	807
DEGIHpYSELIQ	822
KKKKpYPKK	Control peptide
